# Supplementary material for: Forecasting contrail climate forcing for flight planning and air traffic management applications: The CocipGrid model in pycontrails 0.51.0
Source: Copernicus journal article supplement (doi:10.5194/egusphere-2024-1361), 2024-06-20
Supplement: Supplementary file 1 [file egusphere-2024-1361-supplement.pdf]

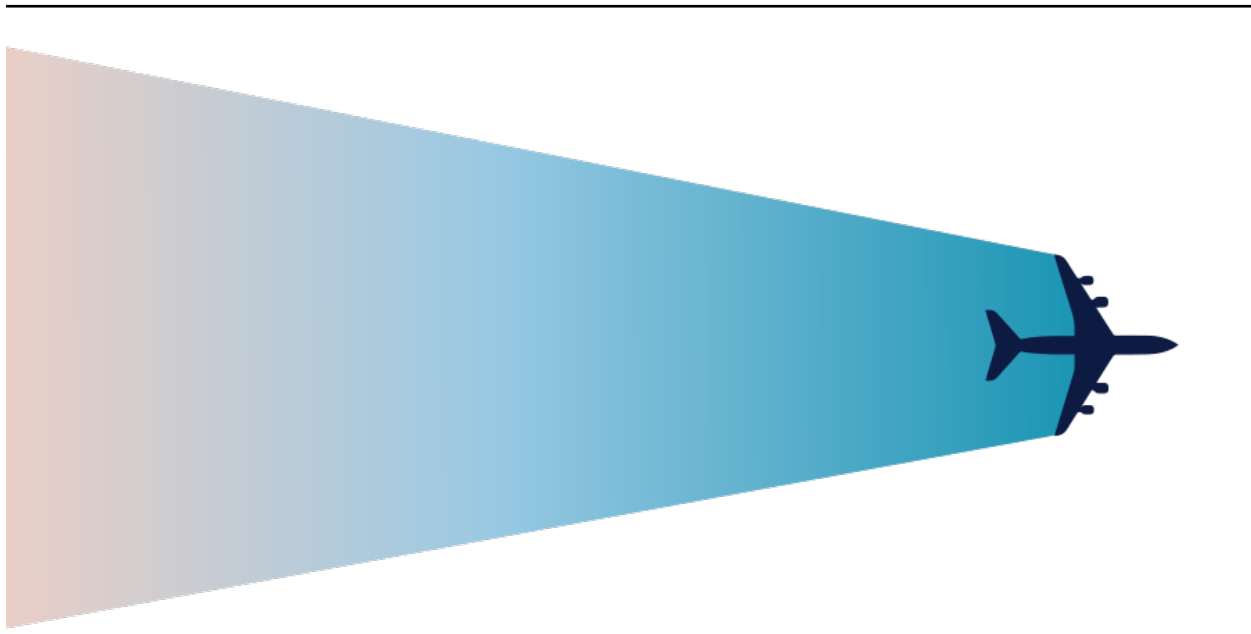

# **pycontrails**

*Release 0.51.0*

**Breakthrough Energy**

**May 28, 2024**



## GETTING STARTED

|           |                                        |            |
|-----------|----------------------------------------|------------|
| <b>1</b>  | <b>Install</b>                         | <b>3</b>   |
| <b>2</b>  | <b>Develop</b>                         | <b>7</b>   |
| <b>3</b>  | <b>Running Notebooks</b>               | <b>13</b>  |
| <b>4</b>  | <b>Flight data</b>                     | <b>17</b>  |
| <b>5</b>  | <b>Meteorology</b>                     | <b>31</b>  |
| <b>6</b>  | <b>Models</b>                          | <b>59</b>  |
| <b>7</b>  | <b>Observations</b>                    | <b>105</b> |
| <b>8</b>  | <b>Utilities</b>                       | <b>111</b> |
| <b>9</b>  | <b>Tutorials</b>                       | <b>113</b> |
| <b>10</b> | <b>Specific humidity interpolation</b> | <b>137</b> |
| <b>11</b> | <b>API Reference</b>                   | <b>153</b> |
| <b>12</b> | <b>Literature</b>                      | <b>547</b> |
| <b>13</b> | <b>Contributing</b>                    | <b>549</b> |
| <b>14</b> | <b>Changelog</b>                       | <b>551</b> |
|           | <b>Bibliography</b>                    | <b>579</b> |
|           | <b>Python Module Index</b>             | <b>585</b> |



*Python library for modeling contrails and other aviation climate impacts.*

Learn more on [contrails.org](https://contrails.org).

|                  |                                                                                                         |
|------------------|---------------------------------------------------------------------------------------------------------|
| <b>Version</b>   | <a href="#">pypi v0.51.0</a> <a href="#">python 3.9   3.10   3.11   3.12</a>                            |
| <b>Citation</b>  | <a href="#">DOI: 10.5281/zenodo.11263806</a>                                                            |
| <b>Tests</b>     | <a href="#">Unit tests passing</a> <a href="#">Docs passing</a> <a href="#">Release passing</a>         |
| <b>License</b>   | <a href="#">license Apache-2.0</a>                                                                      |
| <b>Community</b> | <a href="#">discussions 19 total</a> <a href="#">issues 9 open</a> <a href="#">pull requests 5 open</a> |



## 1.1 Requires

- Python (3.9 or later)

## 1.2 Core

Install the latest release using pip:

```
# core installation
$ pip install pycontrails

# install with all optional dependencies
$ pip install "pycontrails[complete]"
```

Install the latest development version directly from GitHub:

```
$ pip install git+https://github.com/contrailcirrus/pycontrails.git
```

## 1.3 Optional Dependencies

The pycontrails package uses optional dependencies for specific features:

```
# install all non-development optional dependencies
$ pip install "pycontrails[complete]"

# install specific optional dependencies
$ pip install "pycontrails[dev]"           # Development dependencies
$ pip install "pycontrails[docs]"         # Documentation / Sphinx dependencies
$ pip install "pycontrails[ecmwf]"        # ECMWF datalib interfaces
$ pip install "pycontrails[gcp]"          # Google Cloud Platform caching interface
$ pip install "pycontrails[gfs]"          # GFS datalib interfaces
$ pip install "pycontrails[jupyter]"      # Jupyter notebook and lab interface
$ pip install "pycontrails[vis]"          # Polygon construction methods and plotting support
$ pip install "pycontrails[zarr]"         # Load data from remote Zarr stores

# These packages may not support the latest python version
```

(continues on next page)

(continued from previous page)

```
# and are excluded from "complete"  
$ pip install "pycontrails[open3d]" # Polyhedra construction methods
```

See [project.optional-dependencies] in `pyproject.toml` for the latest optional dependencies.

## 1.4 Pre-built wheels

Wheels for common platforms are available on [PyPI](#). Currently, wheels are available for:

- Linux (x86\_64)
- macOS (x86\_64 and arm64)
- Windows (x86\_64)

It's possible to build the wheels from source using [Cython](#) and a C compiler with the usual `pip install` process. The source distribution on PyPI includes the C files, so it's not necessary to have Cython installed to build from source.

## 1.5 Extensions

Some features of `pycontrails` are written as extensions that can be added manually:

### 1.5.1 BADA

This extension is private due to license restrictions

`pycontrails-bada` is an extension to interface with [BADA](#) aircraft performance data.

```
pip install "pycontrails-bada @ git+ssh://git@github.com/contrailcirrus/pycontrails-bada.  
↳git"
```

### 1.5.2 Cirium

This extension is private due to license restrictions

`pycontrails-cirium` is an extension to the [Cirium](#) database of jet engines.

```
pip install "pycontrails-cirium @ git+ssh://git@github.com/contrailcirrus/pycontrails-  
↳cirium.git"
```



### 1.5.3 ACCF

Interface to DLR / UMadrid ACCF model using a forked version of the climaccf repository.

```
pip install "climaccf @ git+ssh://git@github.com/contrailcirrus/climaccf.git"
```



## 2.1 Requires

- `git`
- `Make`. See `Makefile` for a list of `make` commands.

Developing documentation requires:

- `pandoc` for interpreting Jupyter notebooks
- `LaTeX` for pdf outputs. If you are using a Mac, `MacTeX` is the best option. Note that `LaTeX` can be fairly large to install (~6GB).

## 2.2 Environment

Create a dedicated virtual environment for development:

```
# create environment in <DIR>
$ python3 -m venv <DIR>

# activate environment (Unix-like)
$ source <DIR>/bin/activate
```

If using `Anaconda` / `Miniconda` Python, create a dedicated `Anaconda` environment:

```
# create conda environment
$ conda create -n contrails

# activate environment
$ conda activate contrails
```

## 2.3 Install

After activating the virtual environment, clone the pycontrails repository:

```
$ cd <install-path>
$ git clone git@github.com:contrailcirrus/pycontrails.git
$ cd pycontrails
```

These commands clone via SSH and may require adding an SSH key to your GitHub account. Alternatively, you can clone via HTTPS by running

```
$ cd <install-path>
$ git clone https://github.com/contrailcirrus/pycontrails.git
$ cd pycontrails
```

Install the development version of pycontrails using make:

```
$ make dev-install
```

or install dependencies manually using pip in editable mode:

```
# core development installation
$ pip install -e ".[docs,dev]"

# install optional dependencies as above
$ pip install -e ".[ecmwf,ghfs]"

# make sure to add pre-commit hooks if installing manually
$ pre-commit install
```

## 2.4 Test

Run all code quality checks and unit tests. This is run in the `test` workflow, but should also be run locally before submitting PRs:

```
$ make test
```

Lint the repository with ruff:

```
$ make ruff
```

Autoformat the repository with black:

```
$ make black
```

Run type checking with mypy:

```
$ make mypy
```

Run unit tests with pytest:

```
$ make pytest
```

Run notebook validation with `nbval`:

```
$ make nb-test
```

Run doctests with `pytest`:

```
$ make doctest
```

Notebook validation and doctests require [Copernicus Climate Data Store \(CDS\) credentials](#), and doctests additionally require [Google application credentials](#). If either are missing, the test suite will issue a warning and exit.

## 2.5 Documentation

Documentation is written in [reStructuredText \(rst\)](#) and built with [Sphinx](#). The [quick reStructuredText reference](#) provides a decent rst syntax overview.

Sphinx includes many additional [roles](#), [directives](#), and [extensions](#) to enhance documentation.

Sphinx configuration is written in `docs/conf.py`. See the [Sphinx configuration docs](#) for the full list of configuration options.

Build HTML documentation:

```
# docs build to directory docs/_build/html
$ make docs-build

# automatically build docs on changes
# docs will be served at http://127.0.0.1:8000
$ make docs-serve

# clean up built documentation
$ make docs-clean
```

Build manually with `sphinx-build`:

```
$ sphinx-build -b html docs docs/_build/html # HTML output
```

Sphinx caches builds between changes. To force the whole site to rebuild, use the options `-aE`:

```
$ sphinx-build -aE -b html docs docs/_build/html # rebuild all output
```

See `sphinx-build` for a list of all the possible output builders.

### 2.5.1 Notebooks

Examples and tutorials should be written as isolated executable [Jupyter Notebooks](#). The `nbsphinx` extension includes notebooks in the static documentation.

Notebooks will be automatically evaluated during tests, unless explicitly ignored. To exclude a notebook cell from evaluation during testing or automatic execution, [add the tags `nbval-skip` and `skip-execution`](#) to cell metadata.

To test notebooks locally, run:

```
$ make nb-test
```

To re-execute all notebooks, run:

```
$ make nb-execute
```

## 2.5.2 PDF Output

Building PDF output requires a [LaTeX](#) distribution.

Build pdf documentation:

```
$ make docs-pdf
```

A single pdf output (i.e. `pycontrails.pdf`) will be built within `docs/_build/latex`.

To build manually, run:

```
$ sphinx-build -b latex docs docs/_build/latex
$ cd docs/_build/latex
$ make
```

## 2.5.3 References

Literature references managed in the [pycontrails Zotero](#) library.

The documentation uses [sphinxcontrib-bibtex](#) to include citations and a bibliography.

All references should be cited through documentation and docstrings using the `:cite: role`.

To automatically sync the Zotero library with the `docs/_static/pycontrails.bib` Bibtex file:

- Install [Zotero](#) and add the [pycontrails](#) library.
- Install the [Zotero Better Bibtex](#) extension. Leave defaults during setup.
- Right click on the **pycontrails** library and select *Export Library*
- Export as *Better Bibtex*. You can optionally check *Keep Updated* if you want this file to update every time you make a change to the library.
- Select the file `_static/pycontrails.bib` and press *Save* to overwrite the file.
- Commit the updated `_static/pycontrails.bib`

## 2.5.4 Test

All doc tests first ensure ERA5 data is cached locally:

```
$ make ensure-era5-cached
```

Run rst linter with `doc8`:

```
$ make doc8
```

Run docstring example tests with `doctest`:

```
$ make doctest
```

Test notebook examples with `nbval` `pytest` plugin:

```
$ make nb-test
```

## 2.6 Conventions

### 2.6.1 Code

`pycontrails` aims to implement clear, consistent, performant data structures and models.

The project uses `mypy` for static type checking. All code should have specific, clear type annotations.

The project uses `Black`, `ruff` and `doc8` to standardize code-formatting. These tools are run automatically in a pre-commit hook.

The project uses `pytest` to run unit tests. New code should include clear unit tests for implementation and output values. New test files should be included in the `/tests/unit/` directory.

The project uses `Github Actions` to run code quality and unit tests on each pull request. Test locally before pushing using:

```
$ make test
```

### 2.6.2 Docstrings

Wherever possible, we adhere to the `NumPy docstring conventions`.

The following links are good references for writing `numpy` docstrings:

- [numpydoc docstring guide](#)
- [pandas docstring guide](#)
- [scipy docstring guideline](#)

General guidelines:

```
Use italics, bold and monospace if needed in any explanations
( but not for variable names and doctest code or multi-line code ).
Variable, module, function, and class names
should be written between single back-ticks (numpy).
```

When specifying types in **Parameters** or **See Also**, Sphinx will automatically replace the text with the `napolean_type_aliases` specified in `conf.py`, e.g.

```
"""
Parameters
-----
x : np.ndarray
    Sphinx will automatically replace
    "np.ndarray" with the napolean type alias "numpy.ndarray"
"""
```

The **See Also** section is *not a list*. All of the following work:

```
"""  
See Also  
-----  
:func:`segment_lengths`  
segment_lengths  
:class:`numpy.datetime64`  
np.datetime64  
"""
```

When you specify a type outside of **Parameters**, you have to use the sphinx cross-referencing syntax with the full module name:

```
"""  
This is a :func:`pd.to_datetime` # NO  
and :func:`pandas.to_datetime` # YES  
  
This is a :class:`np.datetime64` # NO  
and :class:`numpy.datetime64` # YES  
"""
```



## RUNNING NOTEBOOKS

The `/docs/notebooks` directory in the repository contains [Jupyter Notebooks](#) demonstrating pycontrails.

### 3.1 Local

To run these notebooks locally, clone or download the repository, enter the docs directory, and launch `jupyter lab`:

```
$ git clone https://github.com/contrailcirrus/pycontrails.git
$ cd pycontrails/docs
$ jupyter lab      # or notebook
```

If you don't have [Jupyter](#) installed, install the optional `pycontrails[jupyter]` dependencies:

```
$ pip install "pycontrails[jupyter]" # Jupyter notebook and lab interface
```

### 3.2 Colab

Notebooks can also be opened in [Google Colab](#). Select *File -> Open -> Github*, enter `contrailcirrus/pycontrails`, then select the Notebook to open.

The screenshot shows the 'Open notebook' interface. On the left, there are navigation options for 'Examples' and 'GitHub'. The main area contains a search bar with the text 'contrailcirrus/pycontrails'. To the right of the search bar is a checkbox labeled 'Include private repos'. Below the search bar, there are two dropdown menus: 'Repository' (set to 'contrailcirrus/pycontrails') and 'Branch' (set to 'main'). Below these, there is a 'Path' section with a list of notebooks: 'docs/integrations/ACCF.ipynb', 'docs/notebooks/AircraftPerformance.ipynb', 'docs/notebooks/Cache.ipynb', and 'docs/notebooks/CoCiP.ipynb'. Each notebook entry has a search icon and a share icon.

Alternatively, any notebook directly with the url <https://colab.research.google.com/github/> + the path to the notebook file on github.com (e.g. [CoCiP.ipynb](#))

pycontrails must be installed into Colab environment by adding the top cell:

```
!pip install pycontrails
```

Credentials and data must be added to each Colab environment. Colab integrates with Google Drive to [load and save data](#) and [store secrets](#).

## 3.3 Data

### 3.3.1 ERA5

Many of these example notebooks make use of ERA5 met data. To avoid waiting for repeated CDS requests to load, it's best to request the full dataset up front (the full ERA5 request downloads and caches ~1GB of meteorology data).

For compatibility with the pycontrails cache, you can initiate this request through the pycontrails data interface. The snippet below coincides with the ERA5 request in [CoCiP.ipynb](#). We recommend that you either run the CoCiP.ipynb notebook first, or run the snippet below before interacting with other notebooks.

```
from pycontrails.datalib.ecmwf import ERA5

time = ("2022-03-01 00:00:00", "2022-03-01 23:00:00")
pressure_levels = [350, 300, 250, 225, 200, 175, 150]
met_variables = ["t", "q", "u", "v", "w", "ciwc", "z", "cc"]
rad_variables = ["tsr", "ttr"]
```

```
ERA5(time=time, variables=met_variables, pressure_levels=pressure_levels).open_
```

(continues on next page)

(continued from previous page)

```
↪metdataset()
ERA5(time=time, variables=rad_variables).open_metdataset()
```

### 3.3.2 OpenSky

Because persistent contrails are a sparse phenomenon, it is a nontrivial task to construct authentic flights exhibiting characteristics from the vantage of contrail research. The data in the `data/flight.csv` file was constructed from the OpenSky database. We document the process here to ensure reproducibility.

OpenSky provides access to an `impala shell` to query their database of ADS-B flight data. The query below identifies flights at low altitude in the hour after 2022-03-01T00 (1646092800). Such flights are expected to be in an initial climb phase or a terminal descent phase. The two cases can be distinguished by consider the `vertrate`.

```
SELECT icao24, SUM(vertrate)
FROM state_vectors_data4
WHERE hour BETWEEN 1646092800 AND 1646092800 + 3600
      AND lon BETWEEN -80 and -30
      AND lat BETWEEN 30 and 40
      AND baroaltitude < 2000
GROUP BY icao24;
```

The query below selects one of the flights from the first output, keeping one waypoint at the start of each minute (the OpenSky database typically contains waypoint data with 1 second frequency.)

```
SELECT *
FROM state_vectors_data4
WHERE hour BETWEEN 1646092800 AND 1646092800 + 8 * 3600
      AND icao24 = 'acdd1b'
      AND time % 60 = 0
      AND baroaltitude IS NOT NULL
ORDER BY time;
```

The OpenSky `impala shell` simply streams text data over SSH. To convert to a CSV, the output of the `impala shell` can be piped (or copy-pasted) into the `query_output.txt` text file referenced below. The pandas code below converts the output of the above query to the `data/flight.csv` file included here.

```
import pandas as pd
df = pd.read_csv("query_output.txt", sep="|", skiprows=[0, 2], skipfooter=1, engine=
↪"python")
df = df.loc[:, ~df.columns.str.startswith("Unnamed")]
df.columns = df.columns.str.strip()

df = df.rename(columns={"lon": "longitude", "lat": "latitude", "baroaltitude": "altitude
↪"})
df["time"] = pd.to_datetime(df["time"], unit="s")
df = df[["longitude", "latitude", "altitude", "time"]]

# artificially clip at 38000 ft to ensure we stay within met bounds
df["altitude"] = df["altitude"].clip(upper=11582.4)
df.to_csv("data/flight.csv", index=False)
```



## FLIGHT DATA

See *Running Notebooks* to interact with these notebooks

### 4.1 Load flight data

Create Flight data structure for working with flight trajectories.

```
[1]: import pandas as pd
import numpy as np

from pycontrails import Flight
from pycontrails.datalib.ecmwf import ERA5
```

#### 4.1.1 Create Flight instance

##### From Numpy Arrays

```
[2]: # waypoints
longitude = np.linspace(0, 50, 100)
latitude = np.linspace(0, 10, 100)
altitude = np.linspace(11000, 11500, 100)
time = pd.date_range("2022-03-01 00:00:00", "2022-03-01 02:00:00", periods=100)

fl = Flight(longitude=longitude, latitude=latitude, altitude=altitude, time=time, flight_
↳id="id")
fl
```

```
[2]: Flight [4 keys x 100 length, 2 attributes]
Keys: longitude, latitude, time, altitude
Attributes:
time          [2022-03-01 00:00:00, 2022-03-01 02:00:00]
longitude     [0.0, 50.0]
latitude      [0.0, 10.0]
altitude      [11000.0, 11500.0]
flight_id     id
crs           EPSG:4326
```

### From Pandas DataFrame

```
[3]: # Example flight
df = pd.DataFrame()
df["longitude"] = np.linspace(0, 50, 100)
df["latitude"] = np.linspace(0, 10, 100)
df["altitude"] = 11000
df["time"] = pd.date_range("2022-03-01 00:00:00", "2022-03-01 02:00:00", periods=100)
fl = Flight(data=df, flight_id="ABC")
fl
```

```
[3]: Flight [4 keys x 100 length, 2 attributes]
      Keys: longitude, latitude, altitude, time
      Attributes:
      time           [2022-03-01 00:00:00, 2022-03-01 02:00:00]
      longitude      [0.0, 50.0]
      latitude       [0.0, 10.0]
      altitude       [11000.0, 11000.0]
      flight_id      ABC
      crs            EPSG:4326
```

### Create Flight without Waypoints

```
[4]: # Example flight
attrs = dict(flight_id="1234", equip="A532")
fl = Flight.create_empty(attrs=attrs)
fl
```

```
[4]: Flight [4 keys x 0 length, 3 attributes]
      Keys: longitude, latitude, time, altitude
      Attributes:
      flight_id      1234
      equip          A532
      crs            EPSG:4326
```

### Create from CSV file

```
[5]: # load flight
df = pd.read_csv("data/flight.csv")
fl = Flight(data=df, flight_id="csv")
fl
```

```
[5]: Flight [4 keys x 175 length, 2 attributes]
      Keys: longitude, latitude, altitude, time
      Attributes:
      time           [2022-03-01 00:50:00, 2022-03-01 03:47:00]
      longitude      [-97.026, -77.036]
      latitude       [32.931, 38.854]
      altitude       [190.5, 11582.4]
      flight_id      csv
      crs            EPSG:4326
```

## 4.1.2 Using the Flight instance

The `flight.data` attribute is a dictionary with `np.ndarray` values

```
[6]: # waypoints
longitude = np.linspace(0, 50, 10)
latitude = np.linspace(0, 10, 10)
altitude = np.linspace(11000, 11500, 10)
time = pd.date_range("2022-03-01 00:00:00", "2022-03-01 02:00:00", periods=10)
attrs = {"flight_id": "ABC123"}
fl = Flight(longitude=longitude, latitude=latitude, altitude=altitude, time=time,
            ↪attrs=attrs)
```

```
[7]: fl.data.keys()
```

```
[7]: dict_keys(['longitude', 'latitude', 'time', 'altitude'])
```

Flight attributes are stored in a dictionary on the `attrs` attribute. The `crs` attribute is always added by default, if not specified.

```
[8]: fl.attrs
```

```
[8]: {'flight_id': 'ABC123', 'crs': 'EPSG:4326'}
```

Data can be set / get from the Flight like a dictionary

```
[9]: # get
lat = fl["latitude"]

# set
lat[5] = 20
fl["latitude"] = lat

# get updated
fl["latitude"][5]
```

```
[9]: 20.0
```

The Flight class contains the following convenience properties

```
[10]: # Pressure altitude, in hPa
fl.level
```

```
[10]: array([226.3170091 , 224.34300442, 222.3862176 , 220.44649846,
          218.52369813, 216.61766904, 214.7282649 , 212.85534072,
          210.99875274, 209.15835847])
```

```
[11]: # Altitude, in ft
fl.altitude_ft
```

```
[11]: array([36089.23884514, 36271.5077282 , 36453.77661126, 36636.04549431,
          36818.31437737, 37000.58326043, 37182.85214348, 37365.12102654,
          37547.38990959, 37729.65879265])
```

```
[12]: # Values that are constant along the flight path
```

(continues on next page)

(continued from previous page)

```
# set constant value along flight waypoints
fl["constant"] = np.full(shape=fl.shape, fill_value=100)

fl.constants
```

```
[12]: {'constant': 100, 'flight_id': 'ABC123', 'crs': 'EPSG:4326'}
```

```
[13]: # Flight distance, in meters
fl.length
```

```
[13]: 7818835.115366629
```

```
[14]: # Time start/end
print(fl.time_start)
print(fl.time_end)
```

```
2022-03-01 00:00:00
2022-03-01 02:00:00
```

```
[15]: # Flight duration, as a pandas Timedelta
fl.duration
```

```
[15]: Timedelta('0 days 02:00:00')
```

```
[16]: # Max time gap between waypoints, as a pandas Timedelta
fl.max_time_gap
```

```
[16]: Timedelta('0 days 00:13:20')
```

```
[17]: # Max distance gap between waypoints, in meters
fl.max_distance_gap
```

```
[17]: 1831403.3492360476
```

### 4.1.3 Intersect with Met data

```
[18]: # waypoints
longitude = np.linspace(0, 50, 50)
latitude = np.linspace(0, 10, 50)
altitude = np.linspace(11000, 11500, 50)
time = pd.date_range("2022-03-01 00:00:00", "2022-03-01 02:00:00", periods=50)
fl = Flight(longitude=longitude, latitude=latitude, altitude=altitude, time=time, flight_
↪ id="ABC")
```

```
[19]: # domain
time = ("2022-03-01 00:00:00", "2022-03-01 03:00:00")
variables = ["t", "q", "u", "v", "w", "ciwc", "z", "cc"]
pressure_levels = [300, 250, 200]
```

```
# get met data
era5 = ERA5(time=time, variables=variables, pressure_levels=pressure_levels)
met = era5.open_metdataset()
```



```
[20]: # interpolate to nearest grid member
fl.intersect_met(met["air_temperature"], method="nearest")

[20]: array([231.6297 , 231.5037 , 231.73001, 231.08833, 218.8252 , 218.8393 ,
        219.00676, 218.07823, 218.66353, 219.61859, 219.48346, 219.66501,
        219.8988 , 219.86067, 219.95186, 220.16989, 220.15166, 220.06793,
        219.71309, 219.5191 , 219.5647 , 219.54646, 219.39972, 219.1908 ,
        219.0192 , 219.02084, 219.36572, 219.42708, 219.39308, 219.49672,
        219.63931, 219.63351, 219.80347, 219.72304, 218.88406, 218.68758,
        219.5904 , 219.66667, 219.75786, 219.57713, 219.53734, 219.87642,
        219.74045, 219.47931, 219.345 , 219.28697, 219.14354, 219.04074,
        218.90147, 218.93463], dtype=float32)
```

```
[21]: # linear interpolation
fl.intersect_met(met["air_temperature"], method="linear")

[21]: array([225.77794, 225.39075, 225.21887, 224.88387, 225.13017, 224.75333,
        224.69849, 224.51218, 224.65642, 225.06851, 225.2779 , 225.23737,
        225.27412, 225.21637, 225.02275, 225.16205, 225.02489, 224.83875,
        224.50832, 224.36188, 224.2705 , 224.0278 , 223.71686, 223.553 ,
        223.37677, 223.35237, 223.489 , 223.45067, 223.46031, 223.51036,
        223.47456, 223.33977, 223.33707, 223.19572, 222.68132, 222.43277,
        222.99377, 222.90991, 222.94348, 222.70607, 222.66989, 222.84317,
        222.59155, 222.31973, 222.06894, 221.91066, 221.70157, 221.5247 ,
        221.33913, 221.26541], dtype=float32)
```

#### 4.1.4 Get Lengths

```
[22]: # total flight length in meters
fl.length
```

```
[22]: 5642421.5973290345
```

```
[23]: # intersect flight with air temperature
fl["temp"] = fl.intersect_met(met["air_temperature"], method="nearest")

# get the length of the flight where ambient temperature is > 226 K
fl.length_met("temp", threshold=226)
```

```
[23]: 462850.7958842697
```

#### 4.1.5 Plot and Resample

```
[24]: fl.dataframe.plot.scatter(x="longitude", y="latitude", figsize=(12, 8))
fl.max_distance_gap
```

```
[24]: 115715.16936791067
```

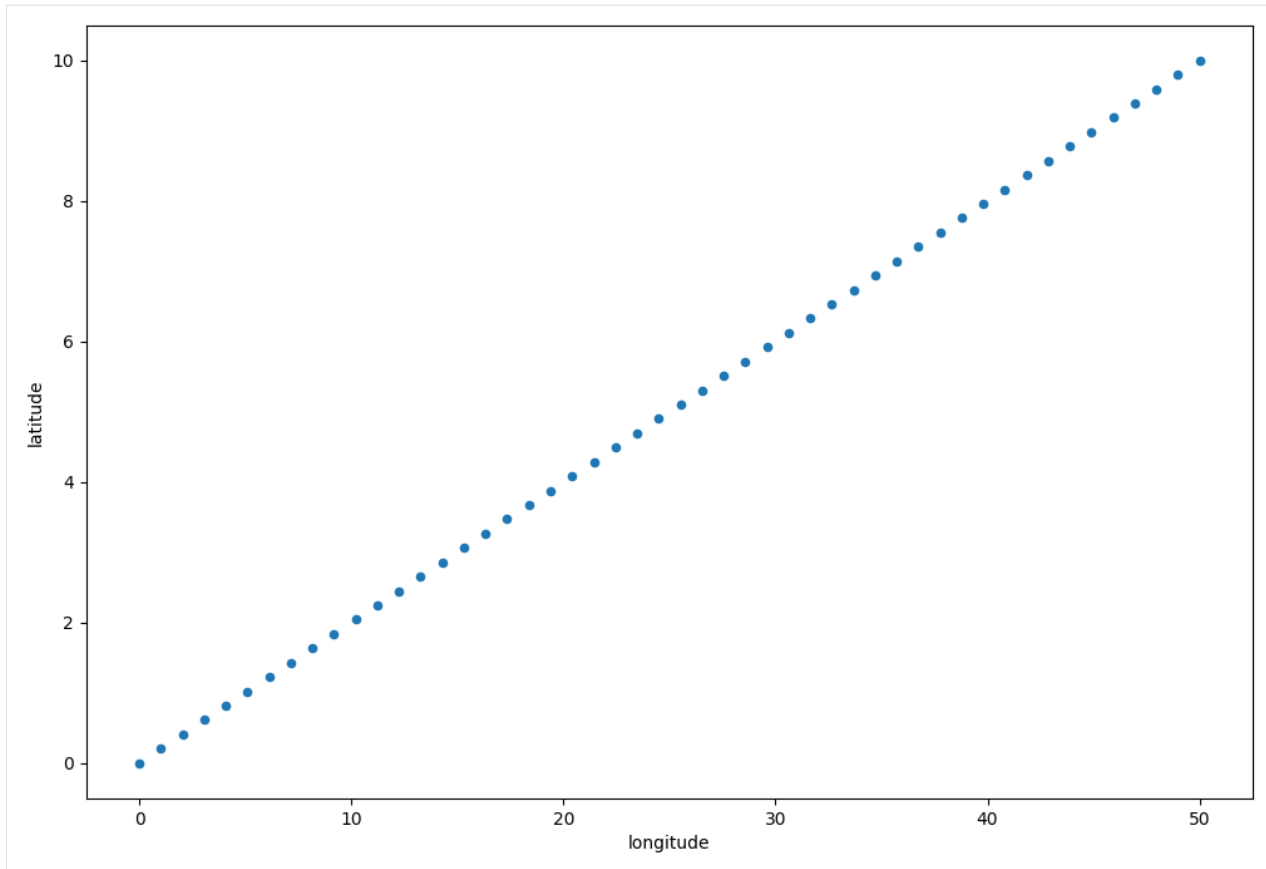

```
[25]: # resample with 10 minute waypoints
fl = fl.resample_and_fill("10min")

fl.dataframe.plot.scatter(x="longitude", y="latitude", figsize=(12, 8))
fl.max_distance_gap
```

```
[25]: 472488.41576537804
```

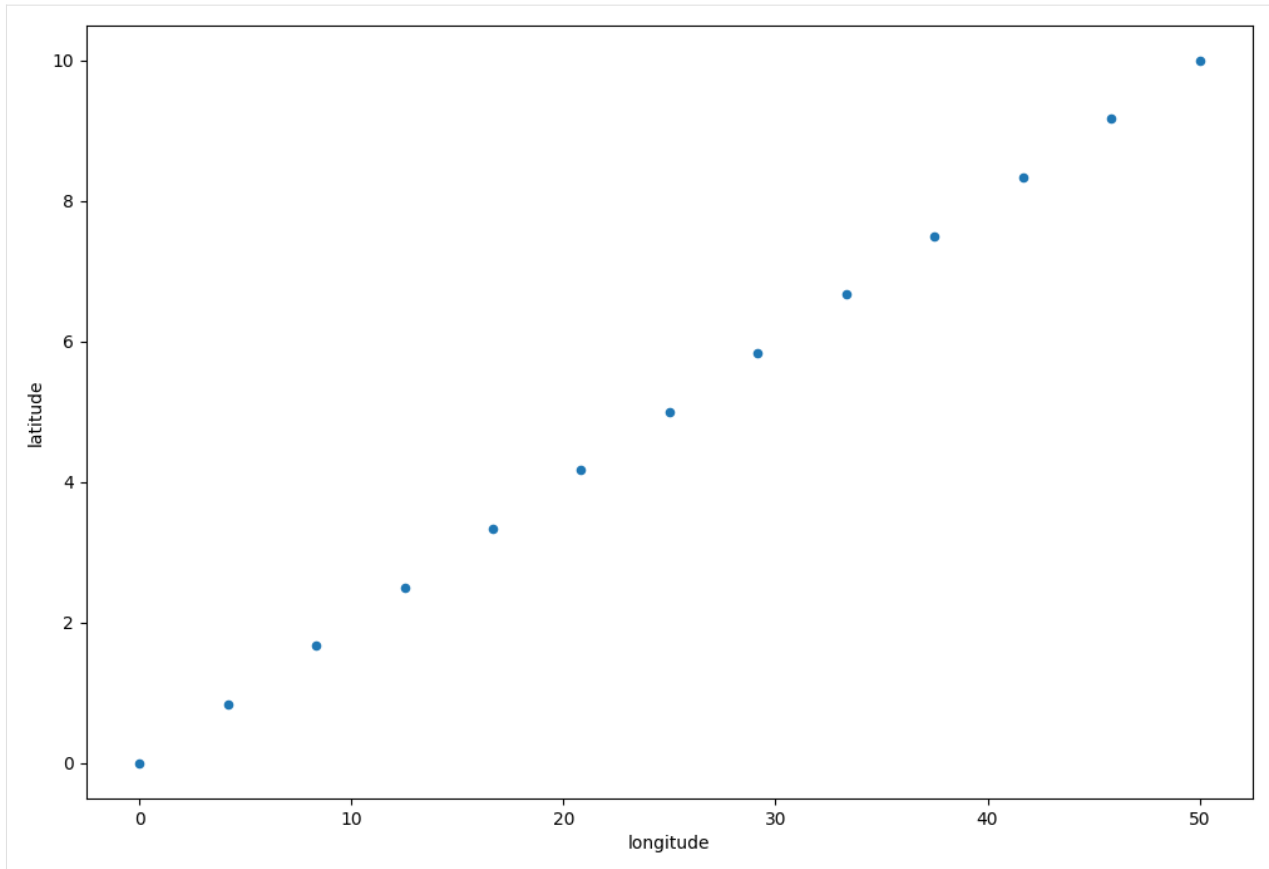

```
[26]: # resample with 10 second waypoints
fl = fl.resample_and_fill("10s")

fl.dataframe.plot.scatter(x="longitude", y="latitude", figsize=(12, 8))
fl.max_distance_gap
```

```
[26]: 7874.969421029368
```

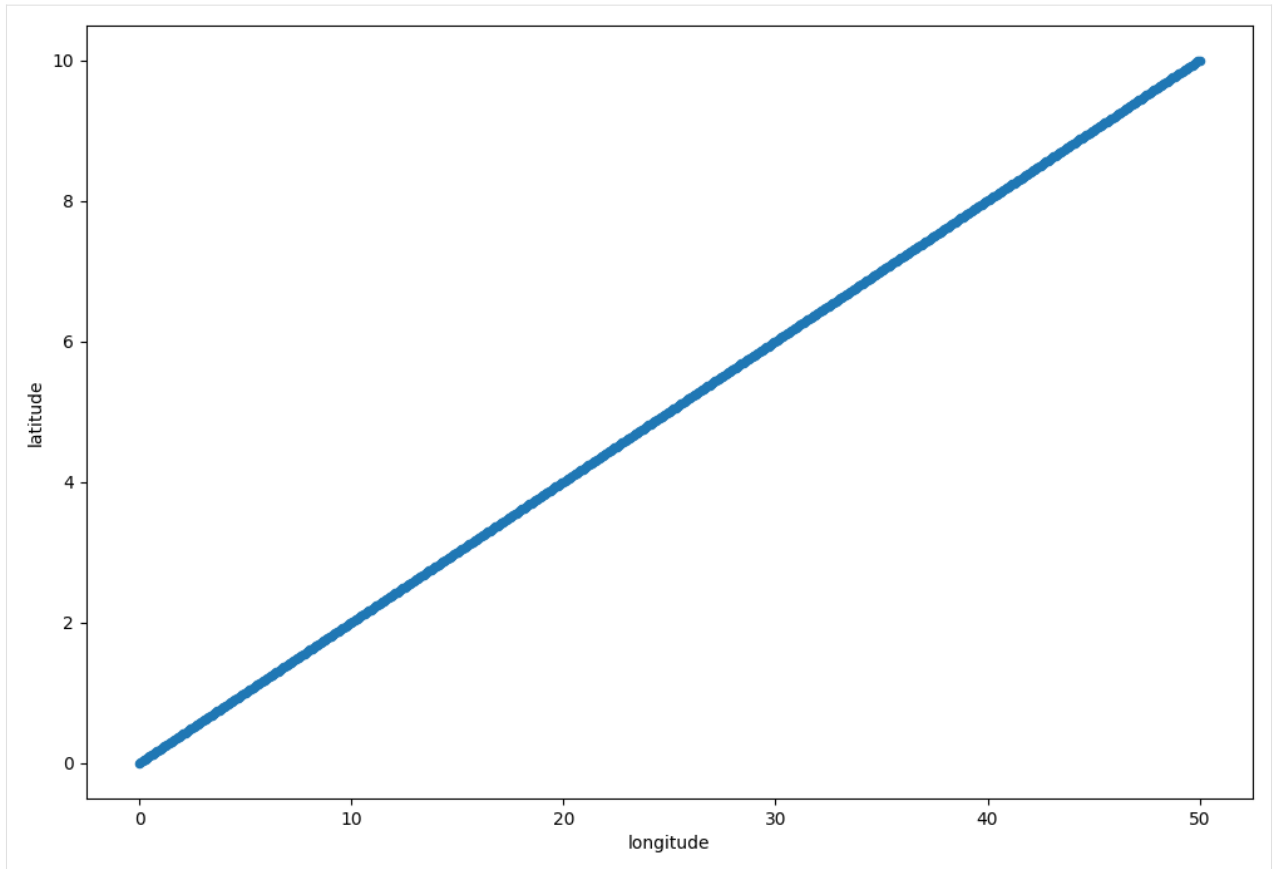

#### 4.1.6 Clean and smooth a noisy flight with gaps

```
[27]: df = pd.read_csv("data/flight-noisy.csv")
df["time"] = df["time"].map(lambda t: np.datetime64(t))
f = Flight(df, drop_duplicated_times=True)
_ = f.dataframe.plot.scatter(x="time", y="altitude_ft")
```

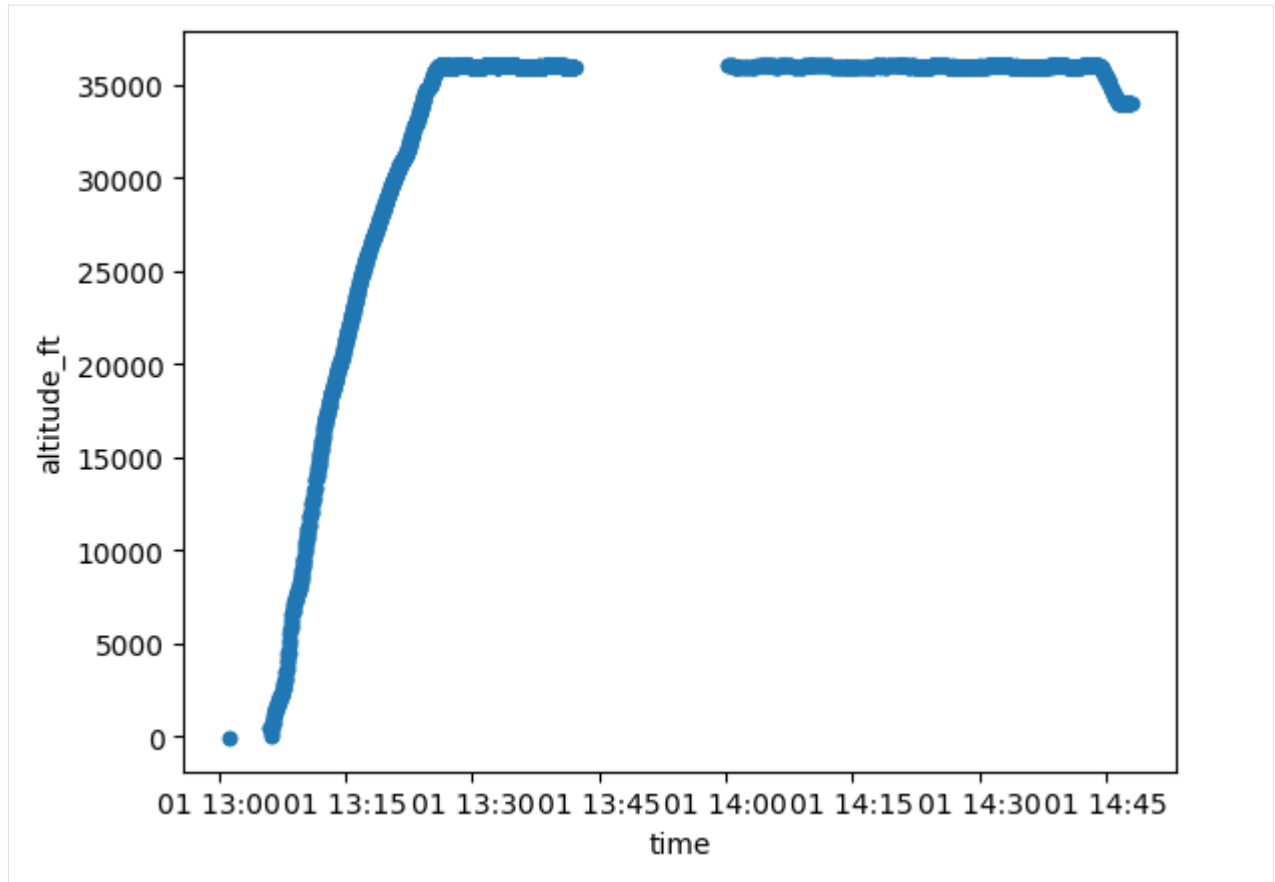

```
[28]: f = f.clean_and_resample(nominal_rocd=20)
      _ = f.dataframe.plot.scatter(x="time", y="altitude")
```

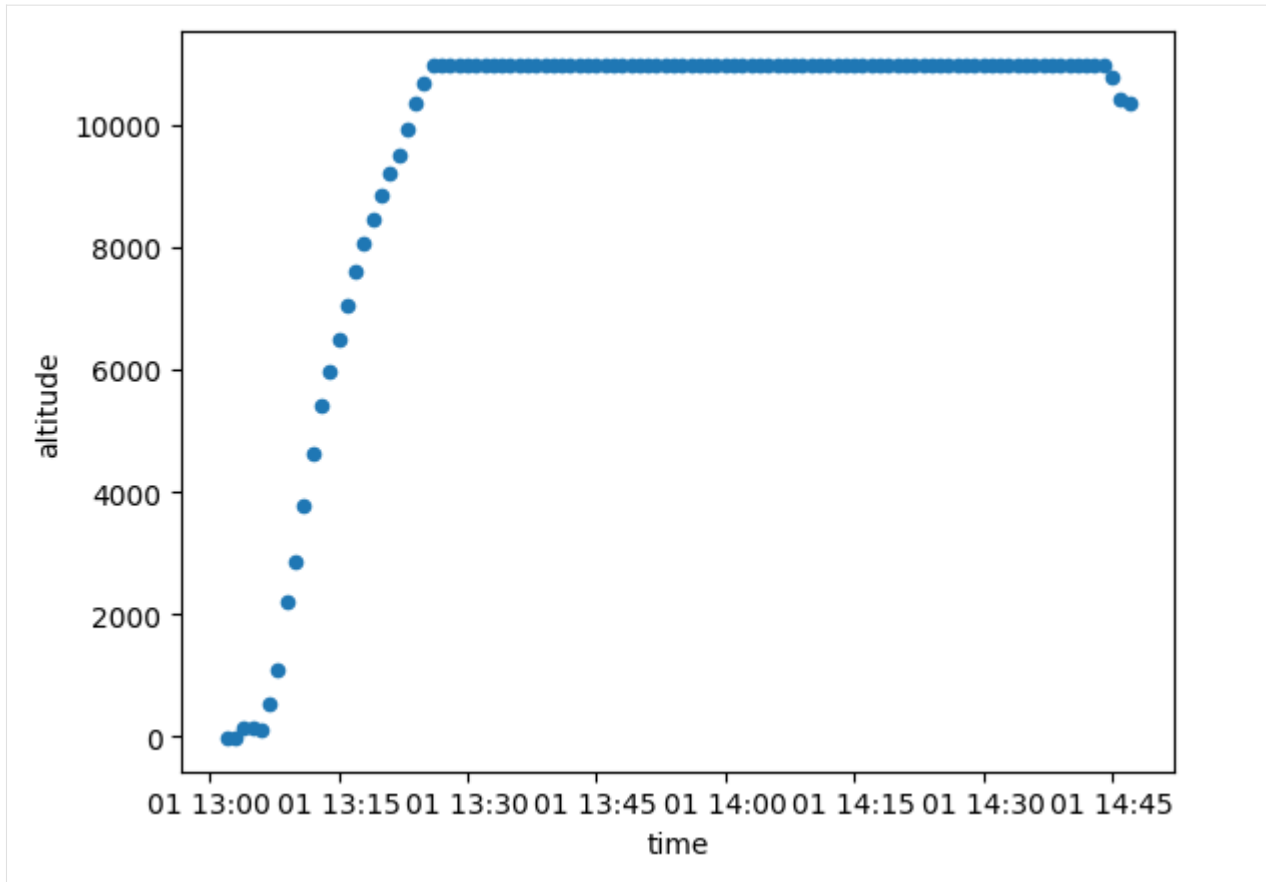

## 4.2 Access airport data

The `pycontrails.core.airports` module provides access to global airport data and helper functions for working with airport data.

Airport data is loaded at runtime from [Our Airports](#) from a fork of the [ourairports-data](#) repository.

```
[1]: from pycontrails.core import airports
```

### 4.2.1 Download global airport database

The `global_airport_database` method downloads and caches airport data.

```
[2]: db = airports.global_airport_database()
db.head()
```

```
[2]:
```

|   | type          | name                     | latitude   | longitude  | \ |
|---|---------------|--------------------------|------------|------------|---|
| 0 | small_airport | Rothera Point Airport    | -67.566941 | -68.126993 |   |
| 1 | small_airport | Angeles City Flying Club | 15.254326  | 120.677772 |   |
| 2 | small_airport | Afutara Aerodrome        | -9.191389  | 160.948611 |   |
| 3 | small_airport | Ulawu Airport            | -9.860544  | 161.979547 |   |
| 4 | small_airport | Uru Harbour Airport      | -8.873330  | 161.011002 |   |

(continues on next page)

(continued from previous page)

```

    elevation_ft iso_country iso_region  municipality scheduled_service \
0           0.0         AQ      AQ-U-A  Rothera Point             no
1          100.0         PH      PH-U-A              MG             no
2           23.0         SB      SB-ML           Bila             yes
3           40.0         SB      SB-MK           Arona            no
4           0.0         SB      SB-ML           Atoifi           yes

    icao_code iata_code  elevation_m
0      AAXX      NaN         0.0000
1      ACFC      AFC         30.4800
2      AGAF      AFT         7.0104
3      AGAR      RNA         12.1920
4      AGAT      ATD         0.0000

```

You can override the cache location by passing in a pycontrails `CacheStore` to the `cachestore` argument:

```
[3]: from pycontrails import DiskCacheStore
```

```
[4]: cache = DiskCacheStore(cache_dir="data/airports")
db = airports.global_airport_database(cachestore=cache)
db.head()
```

```
[4]:
    type                name  latitude  longitude \
0  small_airport  Rothera Point Airport -67.566941 -68.126993
1  small_airport  Angeles City Flying Club  15.254326  120.677772
2  small_airport  Afutara Aerodrome -9.191389  160.948611
3  small_airport  Ulawa Airport -9.860544  161.979547
4  small_airport  Uru Harbour Airport -8.873330  161.011002

    elevation_ft iso_country iso_region  municipality scheduled_service \
0           0.0         AQ      AQ-U-A  Rothera Point             no
1          100.0         PH      PH-U-A              MG             no
2           23.0         SB      SB-ML           Bila             yes
3           40.0         SB      SB-MK           Arona            no
4           0.0         SB      SB-ML           Atoifi           yes

    icao_code iata_code  elevation_m
0      AAXX      NaN         0.0000
1      ACFC      AFC         30.4800
2      AGAF      AFT         7.0104
3      AGAR      RNA         12.1920
4      AGAT      ATD         0.0000

```

You can force an update of the cached airports by passing in `update_cache=True`:

```
[5]: # redownloads airport database
db = airports.global_airport_database(update_cache=True)
```

## 4.2.2 Find nearest airport

Find the nearest airport to waypoint location

```
[6]: # a point in the Massachusetts bay close to BOS
longitude = -70.842554
latitude = 42.387466
altitude = 1000

# open the airport database
db = airports.global_airport_database()

# returns the icao code of the closest airport
airports.find_nearest_airport(db, longitude, latitude, altitude)

[6]: 'KBOS'
```

The function returns None if no airport is found within the default bounding box (2°)

```
[7]: # Somewhere in the atlantic
longitude = -50
latitude = 35
altitude = 1000

airports.find_nearest_airport(db, longitude, latitude, altitude)
```

Pass in the bbox parameter (in units of °) to increase the search distance

```
[8]: airports.find_nearest_airport(db, longitude, latitude, altitude, bbox=20)

[8]: 'CYYT'
```

## 4.2.3 Find distance to airports

Calculate the haversine distance (in m) to all input airports

```
[9]: db = airports.global_airport_database()

# select BOS and JFK
subset = db[db["iata_code"].isin(["BOS", "JFK"])]

# Find distance to a point in the massachusetts bay close to BOS
longitude = -70.842554
latitude = 42.387466
altitude = 500

airports.distance_to_airports(subset, longitude, latitude, altitude)

[9]: array([ 13616.14944594, 312341.96236736])
```



## 4.3 Parse a flight plan

The `pycontrails.core.flightplan` module provides utilities for working with standard flight plan formats.

Only ICAO ATC flight plan supported currently.

### 4.3.1 References

- ICAO Doc 4444 ATM/501 - Procedures for Air Navigation Services (Appendix 2)
- FAA Form 7233-4 - International Flight Plan

```
[1]: from pycontrails.core import flightplan
```

```
[2]: atc_plan = """
(FPL-GEC8145-IN -B77L/H-SDE2E3FGHIJ3J4J5M1RWXYZ/SB1D1
-EGGL1040 -N0474F360 IMVUR1Z IMVUR N63 SAM N19 ADKIK DCT
MOPAT DCT LIMRI/M083F360 DCT 51N020W 47N030W/M083F380 40N040W
34N045W 28N050W/M083F400 24N055W 19N060W DCT AMTTO DCT ANU DCT
-PBN/A1B1C1D1L1O1S1S2 NAV/RNVD1E2A1 DAT/SVM DOF/140501 REG/DALFA
EET/OKAC0037 ORBB0052 LTAA0159 UKFV0308 UKOV0333 LUUU0344 UKLV0406
EPWW0427 ESAA0521 EKDK0540 ENOR0557 SEL/DFBH OPR/GEC RVR/200)
-E/0740 P/3 R/E S/ J/ A/WHITE BLUE TAIL
"""
```

```
[3]: # parse flight plan into a dictionary
plan_dict = flightplan.parse_atc_plan(atc_plan)
plan_dict
```

```
[3]: {'callsign': 'GEC8145',
'flight_rules': 'I',
'type_of_flight': 'N',
'type_of_aircraft': 'B77L',
'wake_category': 'H',
'equipment': 'SDE2E3FGHIJ3J4J5M1RWXYZ',
'transponder': 'SB1D1',
'departure_icao': 'EGGL',
'time': '1040',
'speed_type': 'N',
'speed': '0474',
'level_type': 'F',
'level': '360',
'route': 'IMVUR1Z IMVUR N63 SAM N19 ADKIK DCT MOPAT DCT LIMRI/M083F360 DCT 51N020W_
↪47N030W/M083F380 40N040W 34N045W 28N050W/M083F400 24N055W 19N060W DCT AMTTO DCT ANU_
↪DCT',
'other_info': 'E/0740 P/3 R/E S/ J/ A/WHITE BLUE TAIL'}
```

```
[4]: # write flight plan dictionary back to a string
flightplan.to_atc_plan(plan_dict)
```

```
[4]: '(FPL-GEC8145-IN\n-B77L/H-SDE2E3FGHIJ3J4J5M1RWXYZ/SB1D1\n-EGGL1040\n-N0474F360 IMVUR1Z_
↪IMVUR N63 SAM N19 ADKIK DCT MOPAT DCT LIMRI/M083F360 DCT 51N020W 47N030W/M083F380_
```

(continues on next page)

(continued from previous page)

```
↪40N040W 34N045W 28N050W/M083F400 24N055W 19N060W DCT AMTTO DCT ANU DCT\n\n-E/0740 P/3  
↪R/E S/ J/ A/WHITE BLUE TAIL)'
```

## METEOROLOGY

See *Running Notebooks* to interact with these notebooks

### 5.1 Create meteorology data

Create `MetDataset` and `MetDataArray` data structures for working with meteorology data.

```
[1]: from datetime import datetime

import xarray as xr
import numpy as np

from pycontrails import MetDataset, MetDataArray, MetVariable
```

#### 5.1.1 MetDataArray

Thin wrapper around `xr.DataArray`

```
[2]: rng = np.random.default_rng(seed=2020)

# construct an xarray DataArray with coordinate labels for data
da = xr.DataArray(
    name="random",
    data=rng.random((20, 15, 4, 5)),
    dims=["longitude", "latitude", "level", "time"],
    coords={
        "longitude": np.arange(-100, -80, 1.0),
        "latitude": np.arange(30, 45, 1.0),
        "level": np.arange(100, 500, 100),
        "time": [datetime(2021, 1, 1, h) for h in range(5)],
    },
)
da
```

```
[2]: <xarray.DataArray 'random' (longitude: 20, latitude: 15, level: 4, time: 5)>
array([[[[4.68307543e-01, 5.14342231e-01, 8.63988281e-01,
          7.19386871e-01, 3.33497882e-01],
        [8.81663616e-01, 5.18664864e-01, 5.23219417e-01,
          7.22388696e-01, 4.46782561e-01],
```

(continues on next page)

(continued from previous page)

```

    [8.50357081e-01, 6.83936263e-01, 6.65900069e-01,
     9.46717074e-01, 7.53638850e-01],
    [9.17964165e-02, 8.26090137e-01, 5.55186777e-01,
     2.31152608e-01, 9.82958913e-01]],

    [[5.84613086e-01, 4.26518507e-01, 8.45336094e-01,
     5.07850470e-01, 7.10216629e-01],
     [1.37352673e-01, 4.84569777e-01, 8.89744202e-01,
     9.52976849e-01, 3.76043941e-02],
     [9.54223457e-01, 8.98512171e-01, 4.14081276e-01,
     4.20221061e-01, 6.91400341e-02],
     [4.21756867e-01, 4.93848391e-01, 1.51696284e-01,
     9.41137061e-01, 1.88116189e-01]],

    [[1.90065507e-02, 9.44932088e-01, 9.93219943e-01,
     6.81811974e-01, 7.84335294e-01],
     ...
     [8.92843751e-01, 4.07684237e-01, 3.05168469e-01,
     1.73576037e-01, 3.34321840e-01]],

     [[7.61263799e-01, 9.91563651e-01, 9.47543921e-01,
     6.68735461e-01, 2.71486792e-01],
     [2.05356394e-01, 7.42337468e-01, 2.70578729e-01,
     7.15520327e-01, 7.30134504e-01],
     [6.68886804e-01, 5.15651993e-01, 8.40987212e-01,
     5.37939968e-01, 3.71399439e-01],
     [1.67243220e-01, 9.76645528e-01, 3.08876242e-01,
     8.19142068e-01, 9.69391866e-01]],

     [[4.44617360e-01, 5.02274334e-01, 2.32060554e-01,
     3.54429329e-01, 1.36471633e-01],
     [6.30717612e-01, 2.40955809e-01, 2.54390888e-01,
     7.20384123e-01, 3.42038201e-01],
     [8.20903975e-01, 6.73148542e-01, 8.67869039e-01,
     4.79726457e-01, 8.34115517e-01],
     [3.59797874e-01, 7.61370564e-01, 4.16116300e-01,
     7.46702020e-01, 6.39419576e-01]]]]

Coordinates:
  * longitude (longitude) float64 -100.0 -99.0 -98.0 ... -83.0 -82.0 -81.0
  * latitude  (latitude) float64  30.0 31.0 32.0 33.0 ... 41.0 42.0 43.0 44.0
  * level     (level) int64  100 200 300 400
  * time      (time) datetime64[ns] 2021-01-01 ... 2021-01-01T04:00:00

```

```
[3]: met = MetDataArray(da)
      met
```

```
[3]: MetDataArray with data:
```

```
<xarray.DataArray 'random' (longitude: 20, latitude: 15, level: 4, time: 5)>
array([[[[4.68307543e-01, 5.14342231e-01, 8.63988281e-01,
          7.19386871e-01, 3.33497882e-01],
         [8.81663616e-01, 5.18664864e-01, 5.23219417e-01,
```

(continues on next page)

(continued from previous page)

```

    7.22388696e-01, 4.46782561e-01],
    [8.50357081e-01, 6.83936263e-01, 6.65900069e-01,
     9.46717074e-01, 7.53638850e-01],
    [9.17964165e-02, 8.26090137e-01, 5.55186777e-01,
     2.31152608e-01, 9.82958913e-01]],

    [[5.84613086e-01, 4.26518507e-01, 8.45336094e-01,
      5.07850470e-01, 7.10216629e-01],
     [1.37352673e-01, 4.84569777e-01, 8.89744202e-01,
      9.52976849e-01, 3.76043941e-02],
     [9.54223457e-01, 8.98512171e-01, 4.14081276e-01,
      4.20221061e-01, 6.91400341e-02],
     [4.21756867e-01, 4.93848391e-01, 1.51696284e-01,
      9.41137061e-01, 1.88116189e-01]],

    [[1.90065507e-02, 9.44932088e-01, 9.93219943e-01,
      6.81811974e-01, 7.84335294e-01],
     ...
     [8.92843751e-01, 4.07684237e-01, 3.05168469e-01,
      1.73576037e-01, 3.34321840e-01]],

    [[7.61263799e-01, 9.91563651e-01, 9.47543921e-01,
      6.68735461e-01, 2.71486792e-01],
     [2.05356394e-01, 7.42337468e-01, 2.70578729e-01,
      7.15520327e-01, 7.30134504e-01],
     [6.68886804e-01, 5.15651993e-01, 8.40987212e-01,
      5.37939968e-01, 3.71399439e-01],
     [1.67243220e-01, 9.76645528e-01, 3.08876242e-01,
      8.19142068e-01, 9.69391866e-01]],

    [[4.44617360e-01, 5.02274334e-01, 2.32060554e-01,
      3.54429329e-01, 1.36471633e-01],
     [6.30717612e-01, 2.40955809e-01, 2.54390888e-01,
      7.20384123e-01, 3.42038201e-01],
     [8.20903975e-01, 6.73148542e-01, 8.67869039e-01,
      4.79726457e-01, 8.34115517e-01],
     [3.59797874e-01, 7.61370564e-01, 4.16116300e-01,
      7.46702020e-01, 6.39419576e-01]]])
Coordinates:
  * longitude    (longitude) float64 -100.0 -99.0 -98.0 ... -83.0 -82.0 -81.0
  * latitude     (latitude) float64 30.0 31.0 32.0 33.0 ... 41.0 42.0 43.0 44.0
  * level        (level) float64 100.0 200.0 300.0 400.0
  * time         (time) datetime64[ns] 2021-01-01 ... 2021-01-01T04:00:00
  air_pressure  (level) float64 1e+04 2e+04 3e+04 4e+04
  altitude      (level) float64 1.618e+04 1.178e+04 9.164e+03 7.185e+03

```

```
[4]: # data attribute contains copy of the original xr.DataArray
      isinstance(met.data, xr.DataArray)
```

```
[4]: True
```

```
[5]: # broadcast coords to the DataArray
met.broadcast_coords("air_pressure")

[5]: <xarray.DataArray 'air_pressure' (longitude: 20, latitude: 15, level: 4, time: 5)>
array([[[[10000., 10000., 10000., 10000., 10000.],
         [20000., 20000., 20000., 20000., 20000.],
         [30000., 30000., 30000., 30000., 30000.],
         [40000., 40000., 40000., 40000., 40000.]],

        [[10000., 10000., 10000., 10000., 10000.],
         [20000., 20000., 20000., 20000., 20000.],
         [30000., 30000., 30000., 30000., 30000.],
         [40000., 40000., 40000., 40000., 40000.]],

        [[10000., 10000., 10000., 10000., 10000.],
         [20000., 20000., 20000., 20000., 20000.],
         [30000., 30000., 30000., 30000., 30000.],
         [40000., 40000., 40000., 40000., 40000.]],

        ...,

        [[10000., 10000., 10000., 10000., 10000.],
         [20000., 20000., 20000., 20000., 20000.],
         [30000., 30000., 30000., 30000., 30000.]],

        ...

        [20000., 20000., 20000., 20000., 20000.],
        [30000., 30000., 30000., 30000., 30000.],
        [40000., 40000., 40000., 40000., 40000.]],

        ...,

        [[10000., 10000., 10000., 10000., 10000.],
         [20000., 20000., 20000., 20000., 20000.],
         [30000., 30000., 30000., 30000., 30000.],
         [40000., 40000., 40000., 40000., 40000.]],

        [[10000., 10000., 10000., 10000., 10000.],
         [20000., 20000., 20000., 20000., 20000.],
         [30000., 30000., 30000., 30000., 30000.],
         [40000., 40000., 40000., 40000., 40000.]],

        [[10000., 10000., 10000., 10000., 10000.],
         [20000., 20000., 20000., 20000., 20000.],
         [30000., 30000., 30000., 30000., 30000.],
         [40000., 40000., 40000., 40000., 40000.]]]])

Coordinates:
  * longitude      (longitude) float64 -100.0 -99.0 -98.0 ... -83.0 -82.0 -81.0
  * latitude      (latitude) float64 30.0 31.0 32.0 33.0 ... 41.0 42.0 43.0 44.0
  * level         (level) float64 100.0 200.0 300.0 400.0
  * time          (time) datetime64[ns] 2021-01-01 ... 2021-01-01T04:00:00
  air_pressure    (level) float64 1e+04 2e+04 3e+04 4e+04
  altitude        (level) float64 1.618e+04 1.178e+04 9.164e+03 7.185e+03
```

## 5.1.2 MetDataset

Thin wrapper around `xr.Dataset`

```
[6]: ds = xr.Dataset(
    {
        "random": ([ "longitude", "latitude", "level", "time"], rng.random((20, 15, 4, 5))),
        "ones": ([ "longitude", "latitude", "level", "time"], np.ones((20, 15, 4, 5))),
    },
    coords={
        "longitude": np.arange(-100, -80, 1.0),
        "latitude": np.arange(30, 45, 1.0),
        "level": np.arange(100, 500, 100),
        "time": [datetime(2021, 1, 1, h) for h in range(5)],
    },
)
```

```
[7]: ds
```

```
[7]: <xarray.Dataset>
Dimensions:   (longitude: 20, latitude: 15, level: 4, time: 5)
Coordinates:
  * longitude  (longitude) float64 -100.0 -99.0 -98.0 ... -83.0 -82.0 -81.0
  * latitude   (latitude) float64 30.0 31.0 32.0 33.0 ... 41.0 42.0 43.0 44.0
  * level      (level) int64 100 200 300 400
  * time       (time) datetime64[ns] 2021-01-01 ... 2021-01-01T04:00:00
Data variables:
  random      (longitude, latitude, level, time) float64 0.08219 ... 0.3966
  ones        (longitude, latitude, level, time) float64 1.0 1.0 ... 1.0 1.0
```

```
[8]: met = MetDataset(ds)
met
```

```
[8]: MetDataset with data:
```

```
<xarray.Dataset>
Dimensions:   (longitude: 20, latitude: 15, level: 4, time: 5)
Coordinates:
  * longitude  (longitude) float64 -100.0 -99.0 -98.0 ... -83.0 -82.0 -81.0
  * latitude   (latitude) float64 30.0 31.0 32.0 33.0 ... 41.0 42.0 43.0 44.0
  * level      (level) float64 100.0 200.0 300.0 400.0
  * time       (time) datetime64[ns] 2021-01-01 ... 2021-01-01T04:00:00
  air_pressure (level) float64 1e+04 2e+04 3e+04 4e+04
  altitude     (level) float64 1.618e+04 1.178e+04 9.164e+03 7.185e+03
Data variables:
  random      (longitude, latitude, level, time) float64 0.08219 ... 0.3966
  ones        (longitude, latitude, level, time) float64 1.0 1.0 ... 1.0 1.0
```

```
[9]: # broadcast coords to the DataArray
met.broadcast_coords("air_pressure")
```

```
[9]: <xarray.DataArray 'air_pressure' (longitude: 20, latitude: 15, level: 4, time: 5)>
array([[[[10000., 10000., 10000., 10000., 10000.],
```

(continues on next page)

(continued from previous page)

```

[20000., 20000., 20000., 20000., 20000.],
[30000., 30000., 30000., 30000., 30000.],
[40000., 40000., 40000., 40000., 40000.]],

[[10000., 10000., 10000., 10000., 10000.],
 [20000., 20000., 20000., 20000., 20000.],
 [30000., 30000., 30000., 30000., 30000.],
 [40000., 40000., 40000., 40000., 40000.]],

[[10000., 10000., 10000., 10000., 10000.],
 [20000., 20000., 20000., 20000., 20000.],
 [30000., 30000., 30000., 30000., 30000.],
 [40000., 40000., 40000., 40000., 40000.]],

...,

[[10000., 10000., 10000., 10000., 10000.],
 [20000., 20000., 20000., 20000., 20000.],
 [30000., 30000., 30000., 30000., 30000.],
 ...

[20000., 20000., 20000., 20000., 20000.],
[30000., 30000., 30000., 30000., 30000.],
[40000., 40000., 40000., 40000., 40000.]],

...,

[[10000., 10000., 10000., 10000., 10000.],
 [20000., 20000., 20000., 20000., 20000.],
 [30000., 30000., 30000., 30000., 30000.],
 [40000., 40000., 40000., 40000., 40000.]],

[[10000., 10000., 10000., 10000., 10000.],
 [20000., 20000., 20000., 20000., 20000.],
 [30000., 30000., 30000., 30000., 30000.],
 [40000., 40000., 40000., 40000., 40000.]],

[[10000., 10000., 10000., 10000., 10000.],
 [20000., 20000., 20000., 20000., 20000.],
 [30000., 30000., 30000., 30000., 30000.],
 [40000., 40000., 40000., 40000., 40000.]]])
Coordinates:
 * longitude      (longitude) float64 -100.0 -99.0 -98.0 ... -83.0 -82.0 -81.0
 * latitude      (latitude) float64 30.0 31.0 32.0 33.0 ... 41.0 42.0 43.0 44.0
 * level        (level) float64 100.0 200.0 300.0 400.0
 * time         (time) datetime64[ns] 2021-01-01 ... 2021-01-01T04:00:00
 air_pressure   (level) float64 1e+04 2e+04 3e+04 4e+04
 altitude       (level) float64 1.618e+04 1.178e+04 9.164e+03 7.185e+03

```



### 5.1.3 MetVariable

Dataclass to contain metadata for meteorology variables.

```
[10]: mv = MetVariable(short_name="mv", standard_name="met_variable", long_name="Custom Met_
      ↪Variable")
      mv
[10]: MetVariable(short_name='mv', standard_name='met_variable', long_name='Custom Met Variable
      ↪', level_type=None, ecmwf_id=None, grib1_id=None, grib2_id=None, units=None, amip=None,
      ↪ description=None)

[11]: # attrs shorthand
      mv.attrs
[11]: {'short_name': 'mv',
      'standard_name': 'met_variable',
      'long_name': 'Custom Met Variable'}
```

### Built-in Variables

pycontrails contains many standard met variables in the `pycontrails.core.met_var` module.

The `standard_name` attribute is used by default as string references through the repository.

```
[12]: from pycontrails.core.met_var import (
      AirTemperature,
      SpecificHumidity,
      )
```

```
[13]: AirTemperature.attrs
```

```
[13]: {'short_name': 't',
      'standard_name': 'air_temperature',
      'long_name': 'Air Temperature',
      'units': 'K'}
```

```
[14]: SpecificHumidity.attrs
```

```
[14]: {'short_name': 'q',
      'standard_name': 'specific_humidity',
      'long_name': 'Specific Humidity',
      'units': 'kg kg**-1'}
```

## 5.2 Load ECMWF data

Requires [ecmwf] optional dependencies:

```
$ pip install pycontrails[ecmwf]
```

Support provided for:

- ERA5 via the Copernicus Data Store (CDS) using `cdsapi` or user provided files

- HRES and ENS via MARS using `ecmwf-api-client` or user provided files.

For both ERA5 and HRES, we provide interfaces for accessing “pressure-level data” (fields pre-interpolated to a fixed set of pressure levels) or “model-level data” (fields retrieved on the native vertical grid and *interpolated after retrieval to an arbitrary set of pressure levels*). We recommend using model-level data when possible, as the resolution of pressure-level data is coarse relative to the vertical scale of ice-supersaturated regions.

**Note that tools for accessing ECMWF data are not thoroughly tested in CI because they are vulnerable to upstream failures in external APIs.** If you think you have found a problem please [open an issue!](#)

## 5.2.1 ERA5

### Access

- Requires account with [Copernicus Data Portal](#)
- Provide url and key credentials on input, or refer to the [CDS API Documentation](#) for how to create `~/cndsapirc` file to configure access.

### Reference

- [ERA 5 Data Documentation](#)
- [ERA5 Parameter Listing](#)

### ERA5 Pressure Levels

- [ERA5 Pressure Level Parameters](#)

```
[1]: from pycontrails.datalib.ecmwf import ERA5
```

```
[2]: # get a single time
era5 = ERA5(
    time="2022-03-01 00:00:00",
    variables=["t", "q", "u", "v", "w", "ciwc", "z", "cc"], # supports CF name or short_
    ↪names
    pressure_levels=[200, 250, 300],
    # url="https://cds.climate.copernicus.eu/api/v2",
    # key="<key>"
)
```

```
[2]: ERA5
      Timesteps: ['2022-03-01 00']
      Variables: ['t', 'q', 'u', 'v', 'w', 'ciwc', 'z', 'cc']
      Pressure levels: [200, 250, 300]
      Grid: 0.25
      Dataset: reanalysis-era5-pressure-levels
      Product type: reanalysis
```

```
[3]: # get a range of time and all available pressure levels between 450 and 125 hPa
era5 = ERA5(
    time=("2022-03-01 00:00:00", "2022-03-01 03:00:00"),
```

(continues on next page)

(continued from previous page)

```

variables=[
    "air_temperature",
    "q",
    "u",
    "v",
    "w",
    "ciwc",
    "z",
    "cc",
], # supports CF name or short names
pressure_levels=[300, 250, 200],
# url="https://cds.climate.copernicus.eu/api/v2",
# key="<key>"
)
era5

```

[3]: ERA5

```

Timesteps: ['2022-03-01 00', '2022-03-01 01', '2022-03-01 02', '2022-03-01 03']
Variables: ['t', 'q', 'u', 'v', 'w', 'ciwc', 'z', 'cc']
Pressure levels: [200, 250, 300]
Grid: 0.25
Dataset: reanalysis-era5-pressure-levels
Product type: reanalysis

```

[4]: # this triggers a download from CDS if file isn't in cache store

```

met_pl = era5.open_metdataset()
met_pl

```

[4]: MetDataset with data:

```

<xarray.Dataset> Size: 797MB
Dimensions:                (longitude: 1440, latitude: 721,
                             level: 3, time: 4)
Coordinates:
  * latitude                (latitude) float64 6kB -90.0 ... 90.0
  * level                   (level) float64 24B 200.0 250.0 300.0
  * time                   (time) datetime64[ns] 32B 2022-03-01...
  * longitude              (longitude) float64 12kB -180.0 ... ...
  air_pressure             (level) float64 24B 2e+04 2.5e+04 3e+04
  altitude                (level) float64 24B 1.178e+04 ... 9...
Data variables:
  air_temperature         (longitude, latitude, level, time) float64_
↪100MB dask.array<chunksize=(1440, 721, 3, 1), meta=np.ndarray>
  specific_humidity       (longitude, latitude, level, time) float64_
↪100MB dask.array<chunksize=(1440, 721, 3, 1), meta=np.ndarray>
  eastward_wind          (longitude, latitude, level, time) float64_
↪100MB dask.array<chunksize=(1440, 721, 3, 1), meta=np.ndarray>
  northward_wind         (longitude, latitude, level, time) float64_
↪100MB dask.array<chunksize=(1440, 721, 3, 1), meta=np.ndarray>
  lagrangian_tendency_of_air_pressure (longitude, latitude, level, time) float64_
↪100MB dask.array<chunksize=(1440, 721, 3, 1), meta=np.ndarray>
  specific_cloud_ice_water_content (longitude, latitude, level, time) float64_
↪100MB dask.array<chunksize=(1440, 721, 3, 1), meta=np.ndarray>

```

(continues on next page)

(continued from previous page)

```

geopotential                (longitude, latitude, level, time) float64
↳100MB dask.array<chunksize=(1440, 721, 3, 1), meta=np.ndarray>
fraction_of_cloud_cover     (longitude, latitude, level, time) float64
↳100MB dask.array<chunksize=(1440, 721, 3, 1), meta=np.ndarray>
Attributes:
Conventions:                CF-1.6
history:                    2024-04-17 23:08:13 GMT by grib_to_netcdf-2.25.1: /...
pycontrails_version:       0.50.3.dev18
provider:                   ECMWF
dataset:                    ERA5
product:                    reanalysis

```

## ERA5 Single Level

- ERA5 Single Level Parameters (invariant)
- ERA5 Single Level Parameters (instantaneous)
- ERA5 Single Level Parameters (accumulations)

```

[5]: era5 = ERA5(
      time=("2022-03-01 00:00:00", "2022-03-01 03:00:00"),
      variables=["tsr", "ttr"],
      # url="https://cds.climate.copernicus.eu/api/v2",
      # key="<key>"
    )
era5

```

```

[5]: ERA5
      Timesteps: ['2022-03-01 00', '2022-03-01 01', '2022-03-01 02', '2022-03-01 03']
      Variables: ['tsr', 'ttr']
      Pressure levels: [-1]
      Grid: 0.25
      Dataset: reanalysis-era5-single-levels
      Product type: reanalysis

```

```

[6]: met = era5.open_metdataset()
met

```

```

[6]: MetDataset with data:
<xarray.Dataset> Size: 66MB
Dimensions:                (level: 1, time: 4, latitude: 721,
                             longitude: 1440)
Coordinates:
  * level                   (level) float64 8B -1.0
  * latitude                 (latitude) float64 6kB -90.0 -89.75 ... 90.0
  * time                    (time) datetime64[ns] 32B 2022-03-01 ... 2022-...
  * longitude               (longitude) float64 12kB -180.0 -179.8 ... 179.8
Data variables:
  top_net_solar_radiation   (longitude, latitude, level, time) float64 33MB dask.array
↳<chunksize=(1440, 721, 1, 1), meta=np.ndarray>
  top_net_thermal_radiation (longitude, latitude, level, time) float64 33MB dask.array

```

(continues on next page)

(continued from previous page)

```

↪<chunksize=(1440, 721, 1, 1), meta=np.ndarray>
Attributes:
  Conventions:          CF-1.6
  history:              2024-04-24 21:36:27 GMT by grib_to_netcdf-2.28.1: /...
  pycontrails_version: 0.50.3.dev18
  provider:            ECMWF
  dataset:             ERA5
  product:             reanalysis

```

## ERA5 Model Levels

- ERA5 Model Level Parameters
- ERA5 Catalog (nominal reanalysis)
- ERA5 Catalog (ensemble members)

```
[7]: from pycontrails.datalib.ecmwf import ERA5ModelLevel
```

Model-level data has much higher vertical resolution than pressure-level data, so we download at coarser horizontal resolution to decrease data volume.

If target pressure levels are not explicitly provided, `ERA5ModelLevel` defaults to pressure levels near model levels between 20,000 and 50,000 feet. These levels are determined by reading a static file based on <https://confluence.ecmwf.int/display/UDOC/L137+model+level+definitions>.

```
[8]: era5 = ERA5ModelLevel(
    time=("2022-03-01 00:00:00", "2022-03-01 03:00:00"),
    variables=["t", "q", "u", "v", "w", "ciwc"],
    grid=1.0,
)
era5
```

```
[8]: ERA5ModelLevel
    Timesteps: ['2022-03-01 00', '2022-03-01 01', '2022-03-01 02', '2022-03-01 03']
    Variables: ['t', 'q', 'u', 'v', 'w', 'ciwc']
    Pressure levels: [121, 127, 134, 141, 148, 155, 163, 171, 180, 188, 197, 207, ↵
↪217, 227, 237, 248, 260, 272, 284, 297, 310, 323, 337, 352, 367, 383, 399, 416, 433, ↵
↪451]
    Grid: 1.0
    Dataset: reanalysis-era5-complete
    Product type: reanalysis
```

```
[9]: met_ml = era5.open_metdataset()
met_ml
```

```
[9]: MetDataset with data:
```

```

<xarray.Dataset> Size: 188MB
Dimensions:                (longitude: 360, latitude: 181,
                             level: 30, time: 4)
Coordinates:
  * time                    (time) datetime64[ns] 32B 2022-03-01...

```

(continues on next page)

(continued from previous page)

```

step                                timedelta64[ns] 8B 00:00:00
* level                              (level) float64 240B 121.0 ... 451.0
* latitude                            (latitude) float64 1kB -90.0 ... 90.0
valid_time                           (time) datetime64[ns] 32B 2022-03-01...
* longitude                           (longitude) float64 3kB -180.0 ... 1...
air_pressure                          (level) float32 120B 1.21e+04 ... 4...
altitude                              (level) float32 120B 1.497e+04 ... 6...
Data variables:
air_temperature                       (longitude, latitude, level, time) float32 31MB
↪dask.array<chunks=(360, 181, 30, 1), meta=np.ndarray>
specific_humidity                     (longitude, latitude, level, time) float32 31MB
↪dask.array<chunks=(360, 181, 30, 1), meta=np.ndarray>
eastward_wind                         (longitude, latitude, level, time) float32 31MB
↪dask.array<chunks=(360, 181, 30, 1), meta=np.ndarray>
northward_wind                       (longitude, latitude, level, time) float32 31MB
↪dask.array<chunks=(360, 181, 30, 1), meta=np.ndarray>
lagrangian_tendency_of_air_pressure  (longitude, latitude, level, time) float32 31MB
↪dask.array<chunks=(360, 181, 30, 1), meta=np.ndarray>
specific_cloud_ice_water_content      (longitude, latitude, level, time) float32 31MB
↪dask.array<chunks=(360, 181, 30, 1), meta=np.ndarray>
Attributes:
GRIB_edition:                         2
GRIB_centre:                          ecmf
GRIB_centreDescription:               European Centre for Medium-Range Weather Forecasts
GRIB_subCentre:                       0
Conventions:                          CF-1.7
institution:                          European Centre for Medium-Range Weather Forecasts
history:                               2024-04-24T23:56 GRIB to CDM+CF via cfgrib-0.9.1...
pycontrails_version:                  0.50.3.dev24
provider:                              ECMWF
dataset:                               ERA5
product:                               reanalysis

```

## 5.2.2 HRES

### Access

Users within ECMWF Member and Co-operating States may contact their Computing Representative to obtain access to MARS. All other users may [request a username and password](#) and then [get an api key](#).

Provide `url`, `key`, and `email` credentials on input, or see [ECMWF API Client documentation](#) to configure local `~/ecmwfapirc` file:

```

{
  "url": "https://api.ecmwf.int/v1",
  "email": "<email>",
  "key": "<key>"
}

```

## Reference

- HRES High resolution forecast
- ENS Ensemble forecast

## HRES Pressure Levels

```
[10]: from datetime import datetime
```

```
from pycontrails.datalib.ecmwf import HRES
```

```
[11]: # NOTE / TODO: Including the "ciwc" variable here, the HRES request
# fails with on historic data. However, the request seems to go through
# when the time field is recent (within the last 48 hours?)
time = datetime(2022, 3, 26, 0), datetime(2022, 3, 26, 2)
hres = HRES(
    time=time,
    variables=["t", "q", "u", "v", "w", "z"],
    pressure_levels=[300, 250, 200],
    grid=1,
    # url="https://api.ecmwf.int/v1",
    # key="<key>"
    # email="<email>"
)
hres
```

```
[11]: HRES
```

```
  Timesteps: ['2022-03-26 00', '2022-03-26 01', '2022-03-26 02']
  Variables: ['t', 'q', 'u', 'v', 'w', 'z']
  Pressure levels: [200, 250, 300]
  Grid: 1
  Forecast time: 2022-03-26 00:00:00
  Steps: [0, 1, 2]
```

```
[12]: # convience method to see the underlying MARS request
```

```
print(hres.generate_mars_request())
```

```
retrieve,
  class=od,
  stream=oper,
  expver=1,
  date=20220326,
  time=00,
  type=fc,
  param=t/q/u/v/w/z,
  step=0/1/2,
  grid=1/1,
  levtype=pl,
  levelist=200/250/300
```

```
[13]: # this triggers a download if file isn't in cache store
met_pl = hres.open_metdataset()
met_pl
```

```
[13]: MetDataset with data:
```

```
<xarray.Dataset> Size: 14MB
Dimensions:                (longitude: 360, latitude: 181,
                             level: 3, time: 3)
Coordinates:
  forecast_time             datetime64[ns] 8B 2022-03-26
  * level                   (level) float64 24B 200.0 250.0 300.0
  * latitude                (latitude) float64 1kB -90.0 ... 90.0
  * time                    (time) datetime64[ns] 24B 2022-03-26...
  * longitude               (longitude) float64 3kB -180.0 ... 1...
  air_pressure              (level) float32 12B 2e+04 2.5e+04 3e+04
  altitude                  (level) float32 12B 1.178e+04 ... 9...
Data variables:
  air_temperature           (longitude, latitude, level, time) float32 2MB
↪ dask.array<chunks=(360, 181, 3, 1), meta=np.ndarray>
  specific_humidity         (longitude, latitude, level, time) float32 2MB
↪ dask.array<chunks=(360, 181, 3, 1), meta=np.ndarray>
  eastward_wind             (longitude, latitude, level, time) float32 2MB
↪ dask.array<chunks=(360, 181, 3, 1), meta=np.ndarray>
  northward_wind           (longitude, latitude, level, time) float32 2MB
↪ dask.array<chunks=(360, 181, 3, 1), meta=np.ndarray>
  lagrangian_tendency_of_air_pressure (longitude, latitude, level, time) float32 2MB
↪ dask.array<chunks=(360, 181, 3, 1), meta=np.ndarray>
  geopotential              (longitude, latitude, level, time) float32 2MB
↪ dask.array<chunks=(360, 181, 3, 1), meta=np.ndarray>
Attributes:
  GRIB_edition:            1
  GRIB_centre:             ecmf
  GRIB_centreDescription: European Centre for Medium-Range Weather Forecasts
  GRIB_subCentre:         0
  Conventions:            CF-1.7
  institution:            European Centre for Medium-Range Weather Forecasts
  history:                 2024-04-24T23:57 GRIB to CDM+CF via cfgrib-0.9.1...
  pycontrails_version:    0.50.3.dev24
  provider:               ECMWF
  dataset:                HRES
  product:                forecast
  radiation_accumulated:  True
```



## HRES Single Level

Note that accumulated parameters (i.e. `top_net_thermal_radiation`, `toa_incident_solar_radiation` and other radiation parameters) are accumulated from the *start of the forecast*

```
[14]: hres = HRES(
    time=time,
    variables=["tsr", "ttr"],
    grid=1,
    # url="https://api.ecmwf.int/v1",
    # key="<key>"
    # email="<email>"
)
```

```
[15]: met = hres.open_metdataset()
met
```

```
[15]: MetDataset with data:
```

```
<xarray.Dataset> Size: 2MB
Dimensions:                (level: 1, time: 3, latitude: 181, longitude: 360)
Coordinates:
  * level                    (level) float64 8B -1.0
  forecast_time              datetime64[ns] 8B 2022-03-26
  surface                    float64 8B 0.0
  * latitude                 (latitude) float64 1kB -90.0 -89.0 ... 89.0 90.0
  * time                     (time) datetime64[ns] 24B 2022-03-26 ... 2022-...
  * longitude                (longitude) float64 3kB -180.0 -179.0 ... 179.0
Data variables:
  top_net_solar_radiation    (longitude, latitude, level, time) float32 782kB disk.
  ↪array<chunksize=(360, 181, 1, 1), meta=np.ndarray>
  top_net_thermal_radiation  (longitude, latitude, level, time) float32 782kB disk.
  ↪array<chunksize=(360, 181, 1, 1), meta=np.ndarray>
Attributes:
  GRIB_edition:              1
  GRIB_centre:               ecmf
  GRIB_centreDescription:    European Centre for Medium-Range Weather Forecasts
  GRIB_subCentre:            0
  Conventions:               CF-1.7
  institution:               European Centre for Medium-Range Weather Forecasts
  history:                   2024-04-24T23:57 GRIB to CDM+CF via cfgrib-0.9.1...
  pycontrails_version:       0.50.3.dev24
  provider:                   ECMWF
  dataset:                   HRES
  product:                   forecast
  radiation_accumulated:     True
```

## Specify forecast by runtime

Select data from specific forecast run by `forecast_time`

```
[16]: hres = HRES(
        time=("2022-03-26 01:00:00", "2022-03-26 02:00:00"),
        variables=["t", "q"],
        pressure_levels=[300, 250, 200],
        forecast_time="2022-03-25 12:00:00",
        # url="https://api.ecmwf.int/v1",
        # key="<key>"
        # email="<email>"
    )
hres
```

```
[16]: HRES
      Timesteps: ['2022-03-26 01', '2022-03-26 02']
      Variables: ['t', 'q']
      Pressure levels: [200, 250, 300]
      Grid: 0.25
      Forecast time: 2022-03-25 12:00:00
      Steps: [13, 14]
```

## HRES Model Levels

- [Operational Archive Catalog](#)

```
[17]: from pycontrails.datalib.ecmwf import HRESModelLevel
```

Similar to the model-level ERA5 demo, we download at a relatively coarse horizontal resolution to decrease data volume.

```
[18]: hres = HRESModelLevel(
        time=("2022-03-26 01:00:00", "2022-03-26 02:00:00"),
        variables=["t", "q"],
        forecast_time="2022-03-25 12:00:00",
        grid=1.0,
    )
hres
```

```
[18]: HRESModelLevel
      Timesteps: ['2022-03-26 01', '2022-03-26 02']
      Variables: ['t', 'q']
      Pressure levels: [121, 127, 134, 141, 148, 155, 163, 171, 180, 188, 197, 207, ↵
↵217, 227, 237, 248, 260, 272, 284, 297, 310, 323, 337, 352, 367, 383, 399, 416, 433, ↵
↵451]
      Grid: 1.0
      Forecast time: 2022-03-25 12:00:00
      Steps: [13, 14]
```

```
[19]: met_ml = hres.open_metdataset()
met_ml
```

[19]: MetDataset with data:

```

<xarray.Dataset> Size: 31MB
Dimensions:                (longitude: 360, latitude: 181, level: 30, time: 2)
Coordinates:
  initialization_time      datetime64[ns] 8B 2022-03-25T12:00:00
  * time                   (time) datetime64[ns] 16B 2022-03-26T01:00:00 2022-0...
  * level                  (level) float64 240B 121.0 127.0 134.0 ... 433.0 451.0
  * latitude              (latitude) float64 1kB -90.0 -89.0 -88.0 ... 89.0 90.0
  valid_time              (time) datetime64[ns] 16B 2022-03-26T01:00:00 2022-0...
  * longitude             (longitude) float64 3kB -180.0 -179.0 ... 178.0 179.0
  air_pressure            (level) float32 120B 1.21e+04 1.27e+04 ... 4.51e+04
  altitude                (level) float32 120B 1.497e+04 1.466e+04 ... 6.328e+03
Data variables:
  air_temperature         (longitude, latitude, level, time) float32 16MB dask.array
  ↳<chunksize=(360, 181, 30, 1), meta=np.ndarray>
  specific_humidity       (longitude, latitude, level, time) float32 16MB dask.array
  ↳<chunksize=(360, 181, 30, 1), meta=np.ndarray>
Attributes:
  GRIB_edition:          2
  GRIB_centre:           ecmf
  GRIB_centreDescription: European Centre for Medium-Range Weather Forecasts
  GRIB_subCentre:        0
  Conventions:           CF-1.7
  institution:           European Centre for Medium-Range Weather Forecasts
  history:               2024-04-24T23:59 GRIB to CDM+CF via cfgrib-0.9.1...
  pycontrails_version:   0.50.3.dev24
  provider:              ECMWF
  dataset:               HRES
  product:               forecast
  radiation_accumulated: True

```

### 5.2.3 IFS

In development

Integrated Forecasting System from ECMWF

- [IFS Documentation](#)

## Access

IFS files must be downloaded to a local directory before accessing.

## Reference

- IFS Confluence

```
[20]: from pycontrails.datalib.ecmwf import IFS
```

```
[21]: ifs = IFS(  
    time=("2021-10-02 00:00:00", "2021-10-02 14:00:00"),  
    variables=["air_temperature"],  
    forecast_path="ifs",  
    forecast_date="2021-10-01",  
)
```

## 5.2.4 ECMWF Variables

ECMWF\_VARIABLES attribute lists the supported parameters from the ECMWF Parameter DB as a list [MetVariable]

```
[22]: from pycontrails.datalib.ecmwf import ECMWF_VARIABLES
```

```
[23]: [met_var.standard_name for met_var in ECMWF_VARIABLES]
```

```
[23]: ['air_temperature',  
    'specific_humidity',  
    'geopotential',  
    'eastward_wind',  
    'northward_wind',  
    'lagrangian_tendency_of_air_pressure',  
    'relative_humidity',  
    'atmosphere_upward_relative_vorticity',  
    'fraction_of_cloud_cover',  
    'specific_cloud_ice_water_content',  
    'specific_cloud_liquid_water_content',  
    'potential_vorticity',  
    'surface_air_pressure',  
    'toa_incident_solar_radiation',  
    'top_net_solar_radiation',  
    'top_net_thermal_radiation',  
    'total_cloud_cover',  
    'surface_solar_downward_radiation']
```

```
[24]: from pycontrails.datalib.ecmwf import TopNetSolarRadiation
```

```
[25]: # ECMWF variables contain a link to the param-db entry  
TopNetSolarRadiation.ecmwf_link
```

```
[25]: 'https://apps.ecmwf.int/codes/grib/param-db?id=178'
```

## 5.2.5 Cache Data Files to GCP

Requires [gcp] optional dependencies:

```
$ pip install pycontrails[gcp]
```

By default, data files are cached to the local disk in the users Caches directory.

To cache files to a remote Google Cloud Storage bucket, use the GCPCacheStore

### ERA5

```
[26]: from pycontrails import GCPCacheStore
```

```
[27]: variables = ["air_temperature", "relative_humidity"]

gcp = GCPCacheStore(bucket="contrails-301217-unit-test", cache_dir="test/era5", read_
↳ only=False)

era5 = ERA5(
    time=(datetime(2019, 1, 1, 0), datetime(2019, 1, 1, 2)),
    variables=variables,
    pressure_levels=[300, 250, 150],
    cachestore=gcp,
    # url="https://cds.climate.copernicus.eu/api/v2",
    # key="<key>"
)
```

```
[28]: # download data to cache - uncomment to run
# met = era5.open_metdataset()
```

## 5.3 Load GFS data

Requires [gfs] optional dependencies:

```
$ pip install pycontrails[gfs]
```

### 5.3.1 References

- [NOAA GFS - AWS Open Data Registry](#)
- [NCEI GFS Documentation](#)
- [NOAA GFS Documentation](#)
- [Parameter definitions](#)

See [API Reference](#) for usage.

```
[1]: import numpy as np

from pycontrails.datalib.gfs import GFSForecast
```

```
[2]: # get a single time
gfs = GFSForecast(
    time="2022-03-01 01:00:00",
    variables=["t", "q"], # Supports CF name or short names
    pressure_levels=[200, 250, 300],
    show_progress=True, # Shows download progress from AWS
)
gfs
```

```
[2]: GFSForecast
      Timesteps: ['2022-03-01 01']
      Variables: ['t', 'q']
      Pressure levels: [200, 250, 300]
      Grid: 0.25
      Forecast time: 2022-03-01 00:00:00
```

```
[3]: # get a range of time
gfs = GFSForecast(
    time=("2022-03-01 00:00:00", "2022-03-01 02:00:00"),
    variables=[
        "air_temperature",
        "q",
    ], # supports CF name or short names
    pressure_levels=[200, 250, 300],
    show_progress=True,
)
gfs
```

```
[3]: GFSForecast
      Timesteps: ['2022-03-01 00', '2022-03-01 01', '2022-03-01 02']
      Variables: ['t', 'q']
      Pressure levels: [200, 250, 300]
      Grid: 0.25
      Forecast time: 2022-03-01 00:00:00
```

```
[4]: # this triggers a download from AWS if file isn't in cache store
met = gfs.open_metdataset()
met
```

```
[4]: MetDataset with data:

<xarray.Dataset>
Dimensions:          (longitude: 1440, latitude: 721, level: 3, time: 3)
Coordinates:
  * level             (level) float64 200.0 250.0 300.0
  * latitude          (latitude) float64 -90.0 -89.75 -89.5 ... 89.5 89.75 90.0
  * longitude         (longitude) float64 -180.0 -179.8 -179.5 ... 179.5 179.8
  forecast_time      datetime64[ns] 2022-03-01
  * time              (time) datetime64[ns] 2022-03-01 ... 2022-03-01T02:00:00
  air_pressure       (level) float32 2e+04 2.5e+04 3e+04
  altitude           (level) float32 1.178e+04 1.036e+04 9.164e+03
Data variables:
  air_temperature    (longitude, latitude, level, time) float32 dask.array
↔<chunksize=(1440, 721, 3, 1), meta=np.ndarray>
```

(continues on next page)

(continued from previous page)

```

    specific_humidity (longitude, latitude, level, time) float32 dask.array
    ↳<chunksize=(1440, 721, 3, 1), meta=np.ndarray>
Attributes:
  GRIB_edition:          2
  GRIB_centre:          kwbc
  GRIB_centreDescription: US National Weather Service - NCEP
  GRIB_subCentre:       0
  Conventions:          CF-1.7
  institution:          US National Weather Service - NCEP
  history:               2023-07-12T15:51 GRIB to CDM+CF via cfgrib-0.9.1...
  pycontrails_version:  0.49.3.dev50
  provider:              NCEP
  dataset:               GFS
  product:               forecast

```

```

[5]: # get steps for a specific forecast time
time_bounds = ("2022-11-18 16:00:00", "2022-11-18 18:00:00")
gfs = GFSForecast(
    time_bounds,
    variables=["t", "q"],
    pressure_levels=[200, 250, 300, 350],
    forecast_time=np.datetime64("2022-11-17 00:06:00"),
    show_progress=True,
)
gfs

```

```

[5]: GFSForecast
      Timesteps: ['2022-11-18 16', '2022-11-18 17', '2022-11-18 18']
      Variables: ['t', 'q']
      Pressure levels: [200, 250, 300, 350]
      Grid: 0.25
      Forecast time: 2022-11-17 00:00:00

```

### Run CoCiP with GFS

See the [CoCiP Notebook](#) for more details on running the CoCiP model.

```

[6]: from pycontrails.models.cocip import Cocip
      from pycontrails.physics import units
      from pycontrails import Flight

      import numpy as np
      import pandas as pd

```

```

[7]: time_bounds = ("2022-03-01 00:00:00", "2022-03-01 23:00:00")
      pressure_levels = [300, 250, 200]

      gfs_met = GFSForecast(
          time_bounds, variables=Cocip.met_variables, pressure_levels=pressure_levels, show_
          ↳progress=True
      )

```

(continues on next page)

(continued from previous page)

```
gfs_rad = GFSForecast(time_bounds, variables=Cocip.rad_variables, show_progress=True)
```

```
[8]: # download data from AWS (or open from cache)
```

```
met = gfs_met.open_metdataset()
rad = gfs_rad.open_metdataset()
```

```
[9]: # demo synthetic flight
```

```
flight_attrs = {
    "flight_id": "test",
    # set constants along flight path
    "true_airspeed": 226.099920796651, # true airspeed, m/s
    "thrust": 0.22, # thrust_setting
    "nvpm_ei_n": 1.897462e15, # non-volatile emissions index
    "aircraft_type": "E190",
    "wingspan": 48, # m
    "n_engine": 2,
}

# Example flight
df = pd.DataFrame()
df["longitude"] = np.linspace(-25, -40, 100)
df["latitude"] = np.linspace(34, 40, 100)
df["altitude"] = np.linspace(10900, 10900, 100)
df["engine_efficiency"] = np.linspace(0.34, 0.35, 100)
df["fuel_flow"] = np.linspace(2.1, 2.4, 100) # kg/s
df["aircraft_mass"] = np.linspace(154445, 154345, 100) # kg
df["time"] = pd.date_range("2022-03-01T00:15:00", "2022-03-01T02:30:00", periods=100)

flight = Flight(df, attrs=flight_attrs)
```

```
[10]: # set up CoCiP model with GFS meteorology and radiation
```

```
params = {"dt_integration": np.timedelta64(10, "m")}
cocip = Cocip(met=met, rad=rad, params=params)
```

```
[11]: # evaluate flight in CoCiP model
```

```
output_flight = cocip.eval(source=flight)
```

```
[12]: # review the energy forcing from flight segments
```

```
ax = cocip.source.dataframe.plot("longitude", "latitude", color="k", figsize=(12, 8))
cocip.contrail.plot.scatter(
    "longitude", "latitude", c="ef", cmap="coolwarm", vmin=-1e12, vmax=1e12, ax=ax
);
```



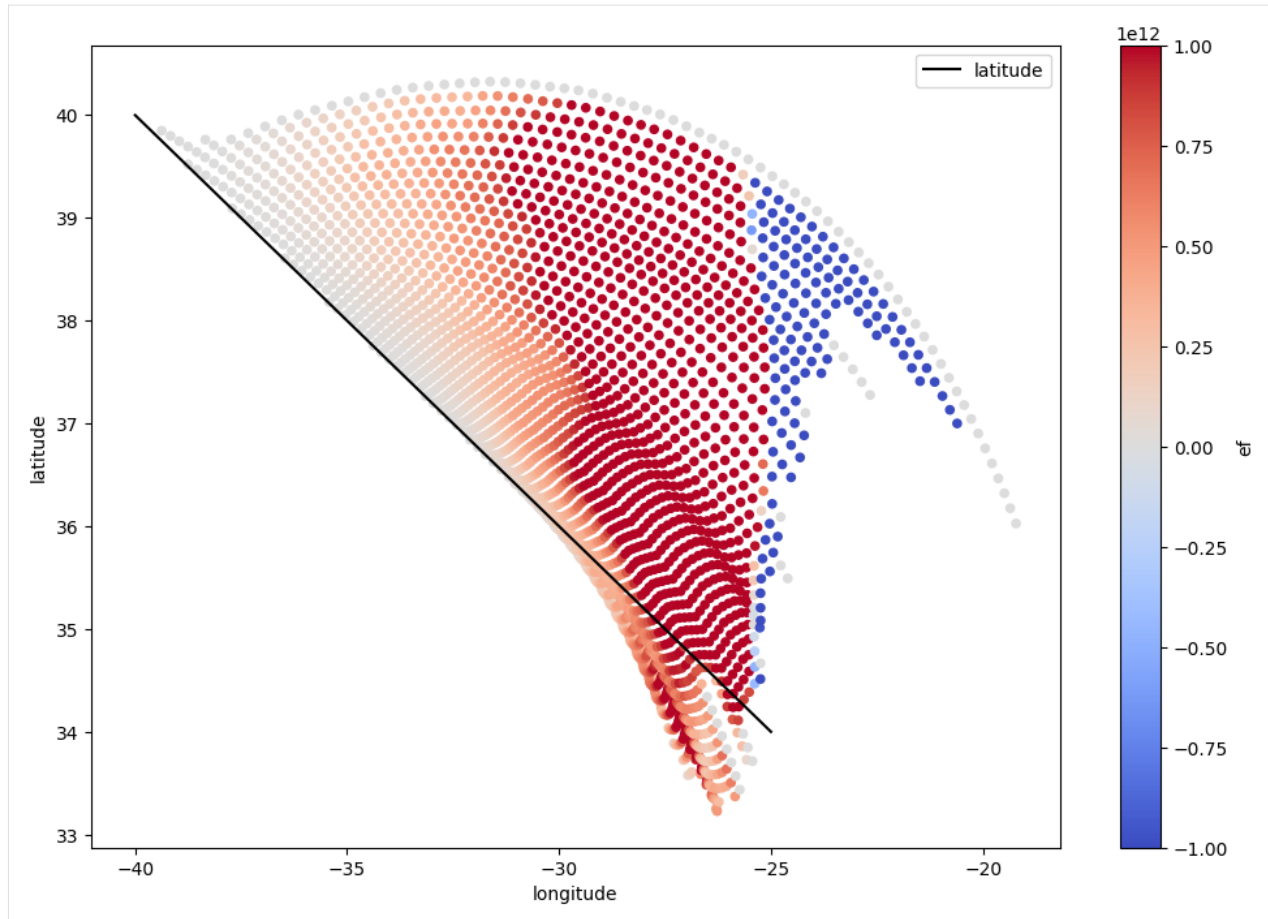

## 5.4 ARCO ERA5

This notebook demonstrates how to load [ARCO ERA5](#) data from [Google Cloud Storage](#) through the `pycontrails ARCOERA5` interface.

The `ARCOERA5` interface requires the [Metview Python API](#), which itself requires a working installation of the Metview binary. Installing the Metview binary is beyond the scope of this notebook, but you can follow the [ECMWF instructions](#). We have had success with the conda installation method.

```
[1]: import matplotlib.pyplot as plt
import numpy as np
import pandas as pd
import xarray as xr

from pycontrails import Flight, MetDataset
from pycontrails.datalib.ecmwf import ARCOERA5
from pycontrails.models.cocip import Cocip
from pycontrails.models.humidity_scaling import ConstantHumidityScaling
from pycontrails.models.issr import ISSR
from pycontrails.models.ps_model import PSflight
from pycontrails.physics import units
```

Load 13 hours of pressure level and single level data from the ARCO ERA5 dataset. Select all the variables needed for the Cocip model.

```
[2]: time = ("2019-01-01T00", "2019-01-01T12")

era5_pl = ARCOERA5(
    time=time,
    variables=(*Cocip.met_variables, *Cocip.optional_met_variables),
    n_jobs=4, # run conversion in parallel among 4 separate processes
)
met = era5_pl.open_metdataset()

era5_sl = ARCOERA5(
    time=time,
    variables=Cocip.rad_variables,
    pressure_levels=-1,
)
rad = era5_sl.open_metdataset()
```

### 5.4.1 ISSRs

Visualize ISSRs over common cruise altitudes over the continental US.

```
[3]: issr = ISSR(met=met, humidity_scaling=ConstantHumidityScaling(rhi_adj=0.95))
source = MetDataset(
    xr.Dataset(
        coords={
            "time": ["2019-01-01T00"],
            "longitude": np.arange(-125, -60, 0.25),
            "latitude": np.arange(25, 50, 0.25),
            "level": units.ft_to_pl(np.arange(27000, 45000, 1000)),
        }
    )
)
da = issr.eval(source).data["issr"]

# Use altitude_ft as the vertical coordinate for plotting
da["altitude_ft"] = units.pl_to_ft(da["level"]).round().astype(int)
da = da.swap_dims(level="altitude_ft")
da = da.sel(altitude_ft=da["altitude_ft"].values[:-1])
da = da.squeeze()

da.plot(x="longitude", y="latitude", col="altitude_ft", col_wrap=4, add_colorbar=False);
```

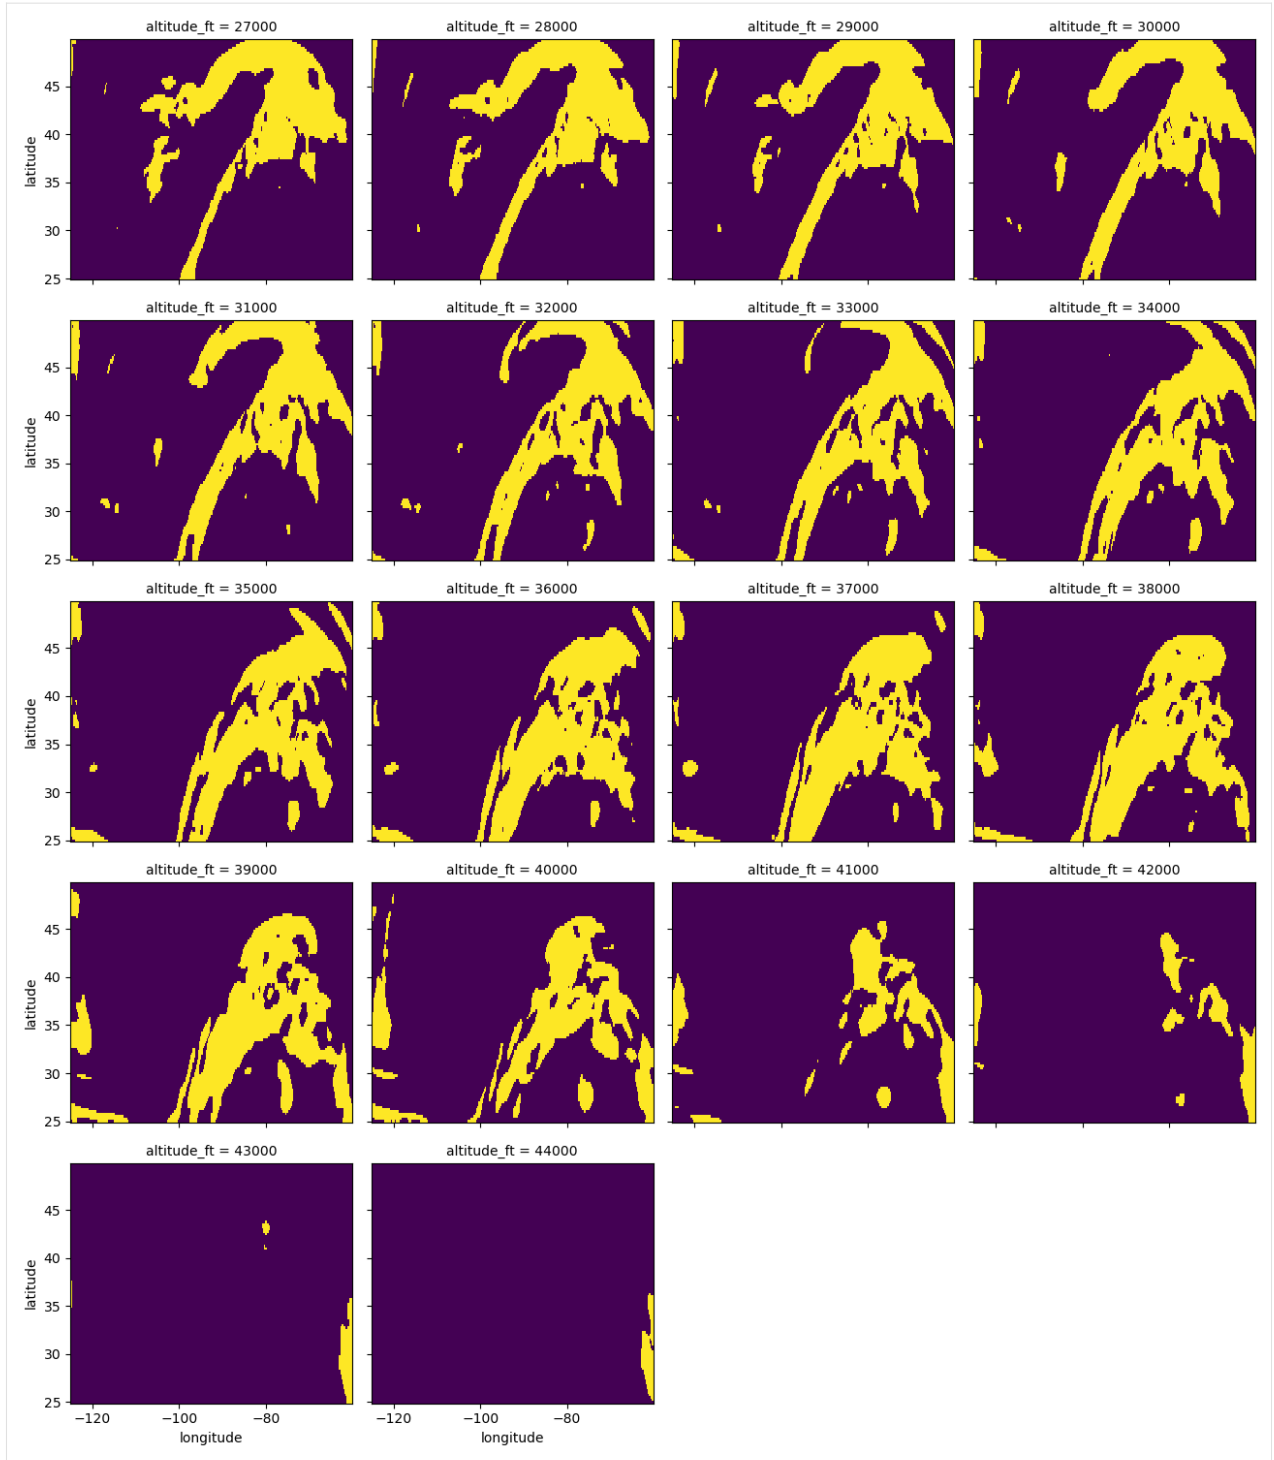

## 5.4.2 CoCiP

Run CoCiP on a collection of synthetic flights at different cruise altitudes over the continental US.

The flights constructed below are in no way realistic. They are simply used to showcase running CoCiP with model level met data.

```
[4]: jfk = 40.64, -73.78
lax = 33.94, -118.40

fl_list = [
    Flight(
        longitude=[lax[1], jfk[1]],
        latitude=[lax[0], jfk[0]],
        altitude_ft=[altitude_ft, altitude_ft],
        time=[np.datetime64("2019-01-01T00"), np.datetime64("2019-01-01T04:30")],
        aircraft_type="B738",
        flight_id=f"cruise {altitude_ft} ft",
        origin="LAX",
        destination="JFK",
    ).resample_and_fill()
    for altitude_ft in range(27000, 45000, 1000)
]
```

```
[5]: cocip = Cocip(
    met=met,
    rad=rad,
    dt_integration="1min",
    max_age="8h",
    aircraft_performance=PSFlight(),
    humidity_scaling=ConstantHumidityScaling(rhi_adj=0.95),
)
fl_list = cocip.eval(fl_list)
```

## 5.4.3 Visualize CoCiP results

Visualize the results of CoCiP on the synthetic flights.

```
[6]: summary = {fl.attrs["flight_id"]: fl["ef"].sum() / 1e12 for fl in fl_list}
pd.Series(summary).to_frame("Energy Forcing [TJ]").astype(int)
```

```
[6]:
```

|                 | Energy Forcing [TJ] |
|-----------------|---------------------|
| cruise 27000 ft | 0                   |
| cruise 28000 ft | 4                   |
| cruise 29000 ft | 44                  |
| cruise 30000 ft | 18                  |
| cruise 31000 ft | 0                   |
| cruise 32000 ft | 0                   |
| cruise 33000 ft | 0                   |
| cruise 34000 ft | 0                   |
| cruise 35000 ft | 50                  |
| cruise 36000 ft | 88                  |
| cruise 37000 ft | 208                 |

(continues on next page)

(continued from previous page)

|                 |     |
|-----------------|-----|
| cruise 38000 ft | 188 |
| cruise 39000 ft | 155 |
| cruise 40000 ft | 185 |
| cruise 41000 ft | 42  |
| cruise 42000 ft | 8   |
| cruise 43000 ft | 0   |
| cruise 44000 ft | 0   |

```
[7]: fig, ax = plt.subplots(figsize=(10, 6))

for fl in fl_list:
    x = fl["time"]
    y = fl["ef"]
    ax.plot(x, y, label=fl.attrs["flight_id"])
    ax.fill_between(x, y, alpha=0.1)

ax.set_ylabel("Energy forcing [J]")
ax.set_xlabel("Waypoint time")

for tick in ax.get_xticklabels():
    tick.set_rotation(45)

ax.set_yscale("symlog", linthresh=1e10)
ax.set_ylim(-1e9, 3e13)

ax.legend();
```

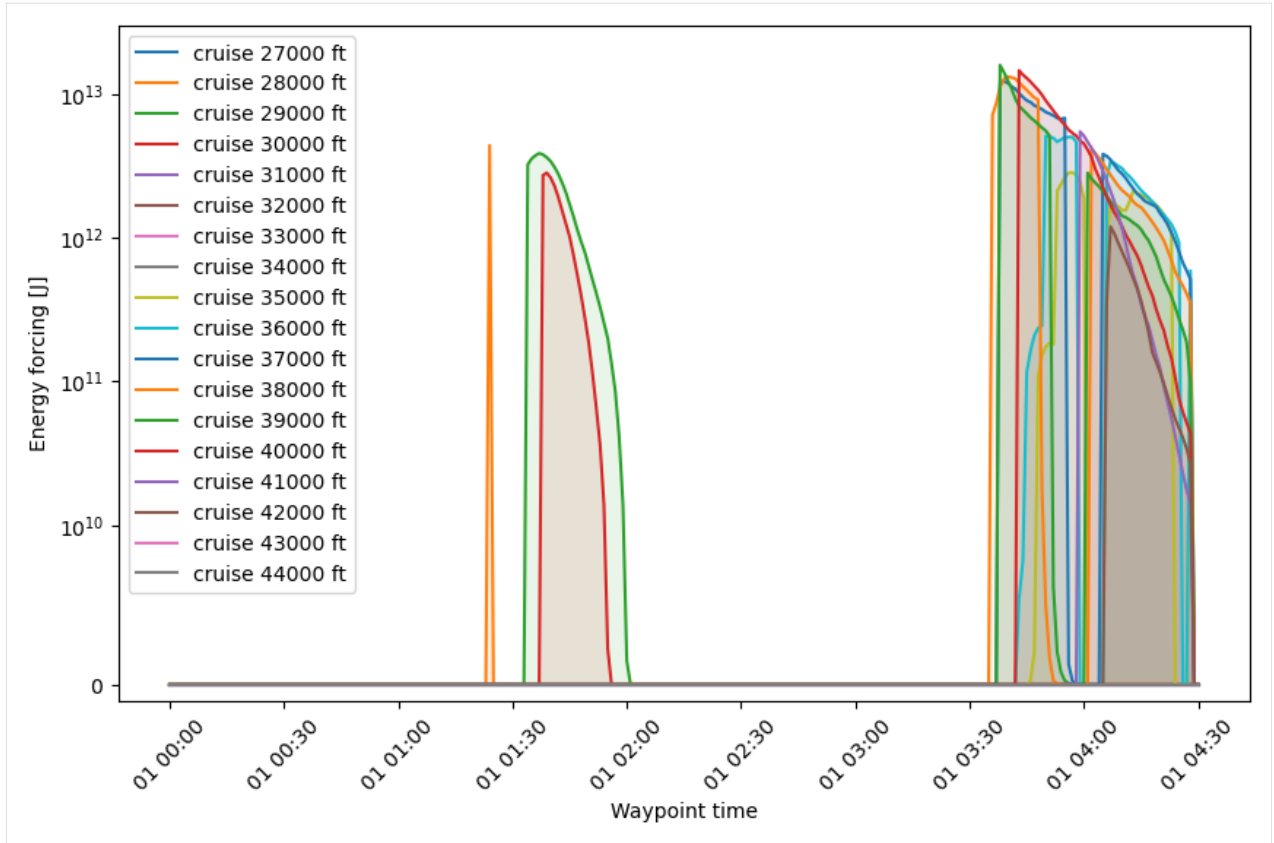

See *Running Notebooks* to interact with these notebooks

## 6.1 ISSR

Model ice super-saturated regions (ISSR) of the atmosphere.

### 6.1.1 Met Data

- Requires account with [Copernicus Data Portal](#) and local `~/ .cdsapirc` file with credentials.

```
[1]: import matplotlib.pyplot as plt
import pandas as pd
from matplotlib.colors import ListedColormap

from pycontrails import Flight
from pycontrails.datalib.ecmwf import ERA5
from pycontrails.models.issr import ISSR

# ignore pycontrails warning about ECMWF humidity scaling
import warnings

warnings.filterwarnings(message=r"[\s\S]* humidity scaling [\s\S]*", action="ignore")
```

#### Get Data

```
[2]: time = ("2022-03-01 00:00:00", "2022-03-01 08:00:00")
pressure_levels = [300, 250, 200]
variables = ["t", "q"]
```

```
[3]: era5 = ERA5(time=time, variables=variables, pressure_levels=pressure_levels)
met = era5.open_metdataset()
```

### Evaluate model

```
[4]: # run model for across full input domain
      # outputs global ice super-saturated regions as 1.0, all other regions as 0.0
      issr_mds = ISSR(met).eval()
      issr = issr_mds["issr"]
```

```
[5]: # edge detection algorithm using differentiation to reduce the areas to lines
      issr_edges = issr.find_edges()
```

```
[6]: da = issr.data.isel(time=0)
      da.plot(x="longitude", y="latitude", row="level", cmap="Reds", figsize=(6, 12));
```



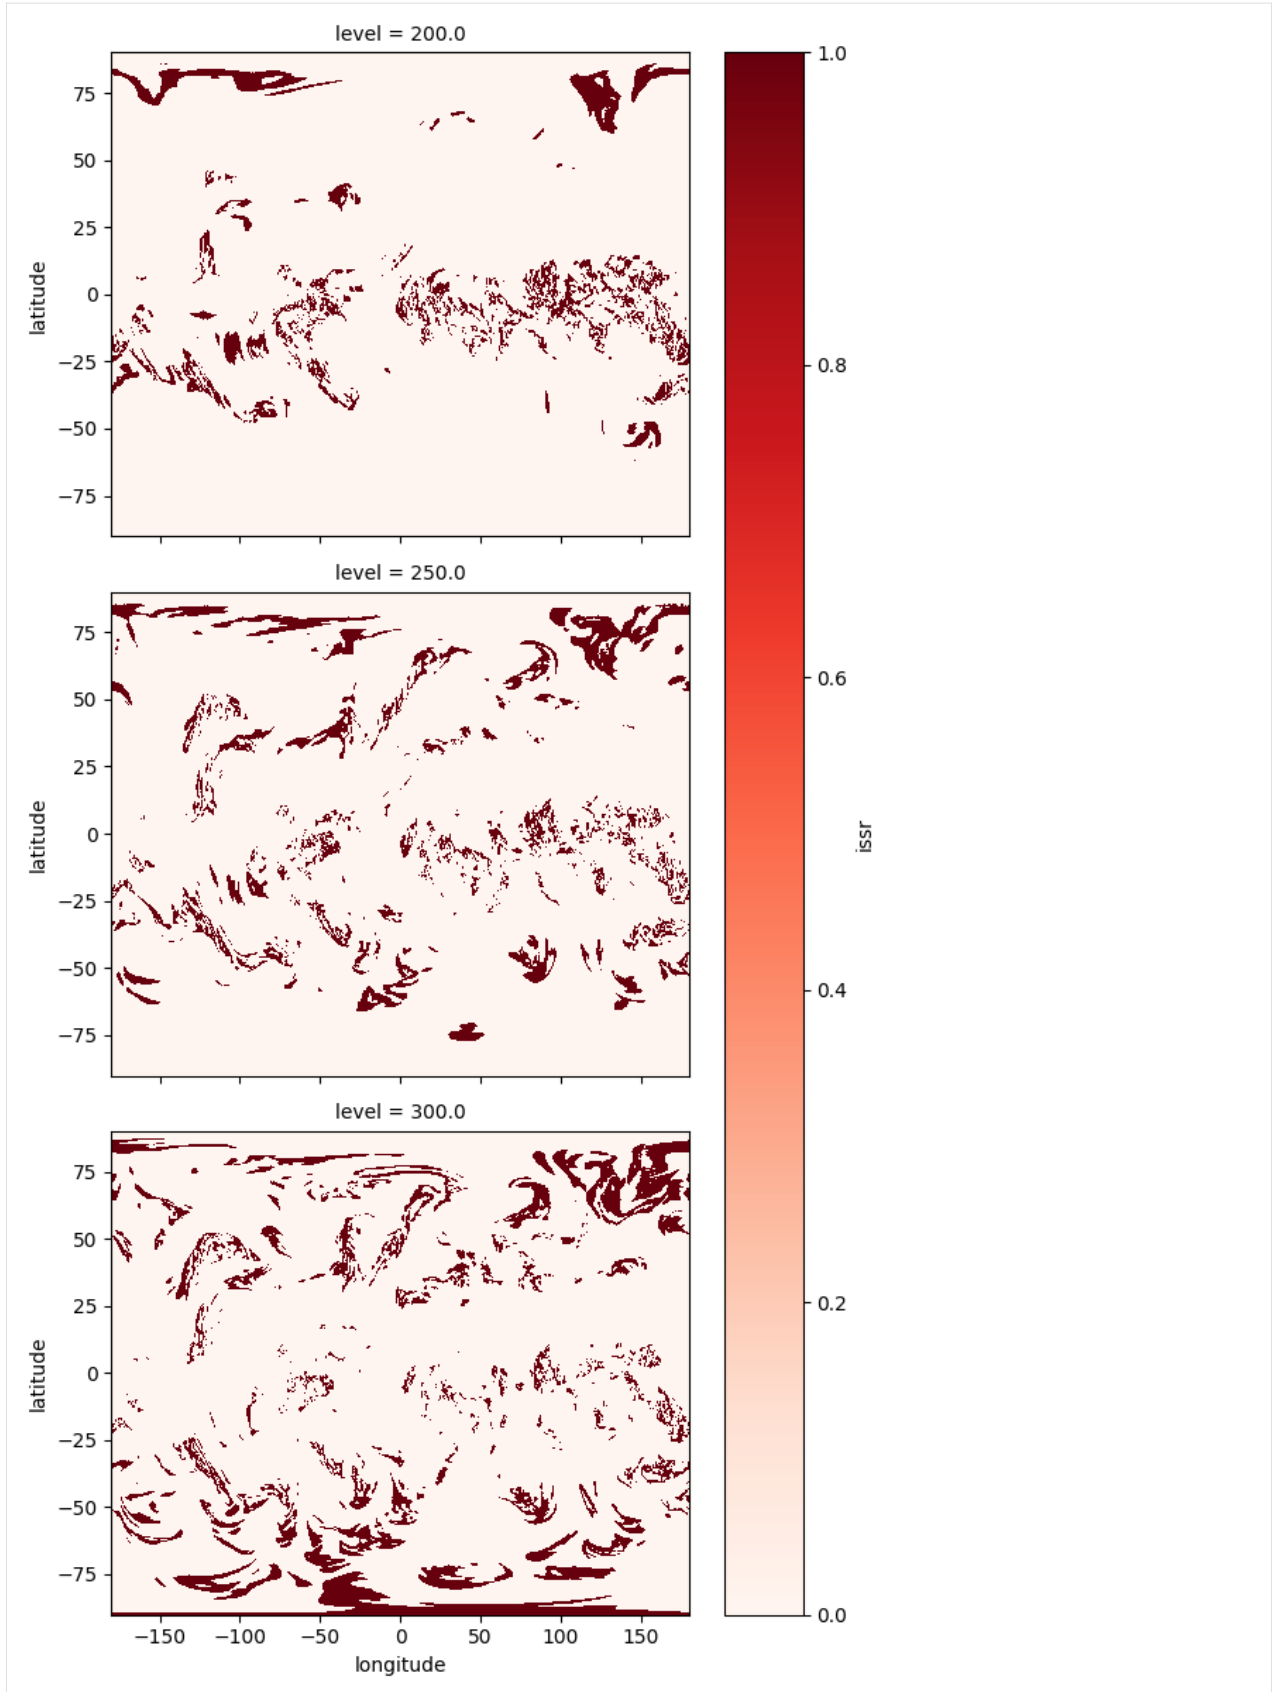

```
[7]: # plot issr edges for each pressure level
da = issr_edges.data.isel(time=0)
da.plot(x="longitude", y="latitude", row="level", cmap="Reds", figsize=(6, 12));
```

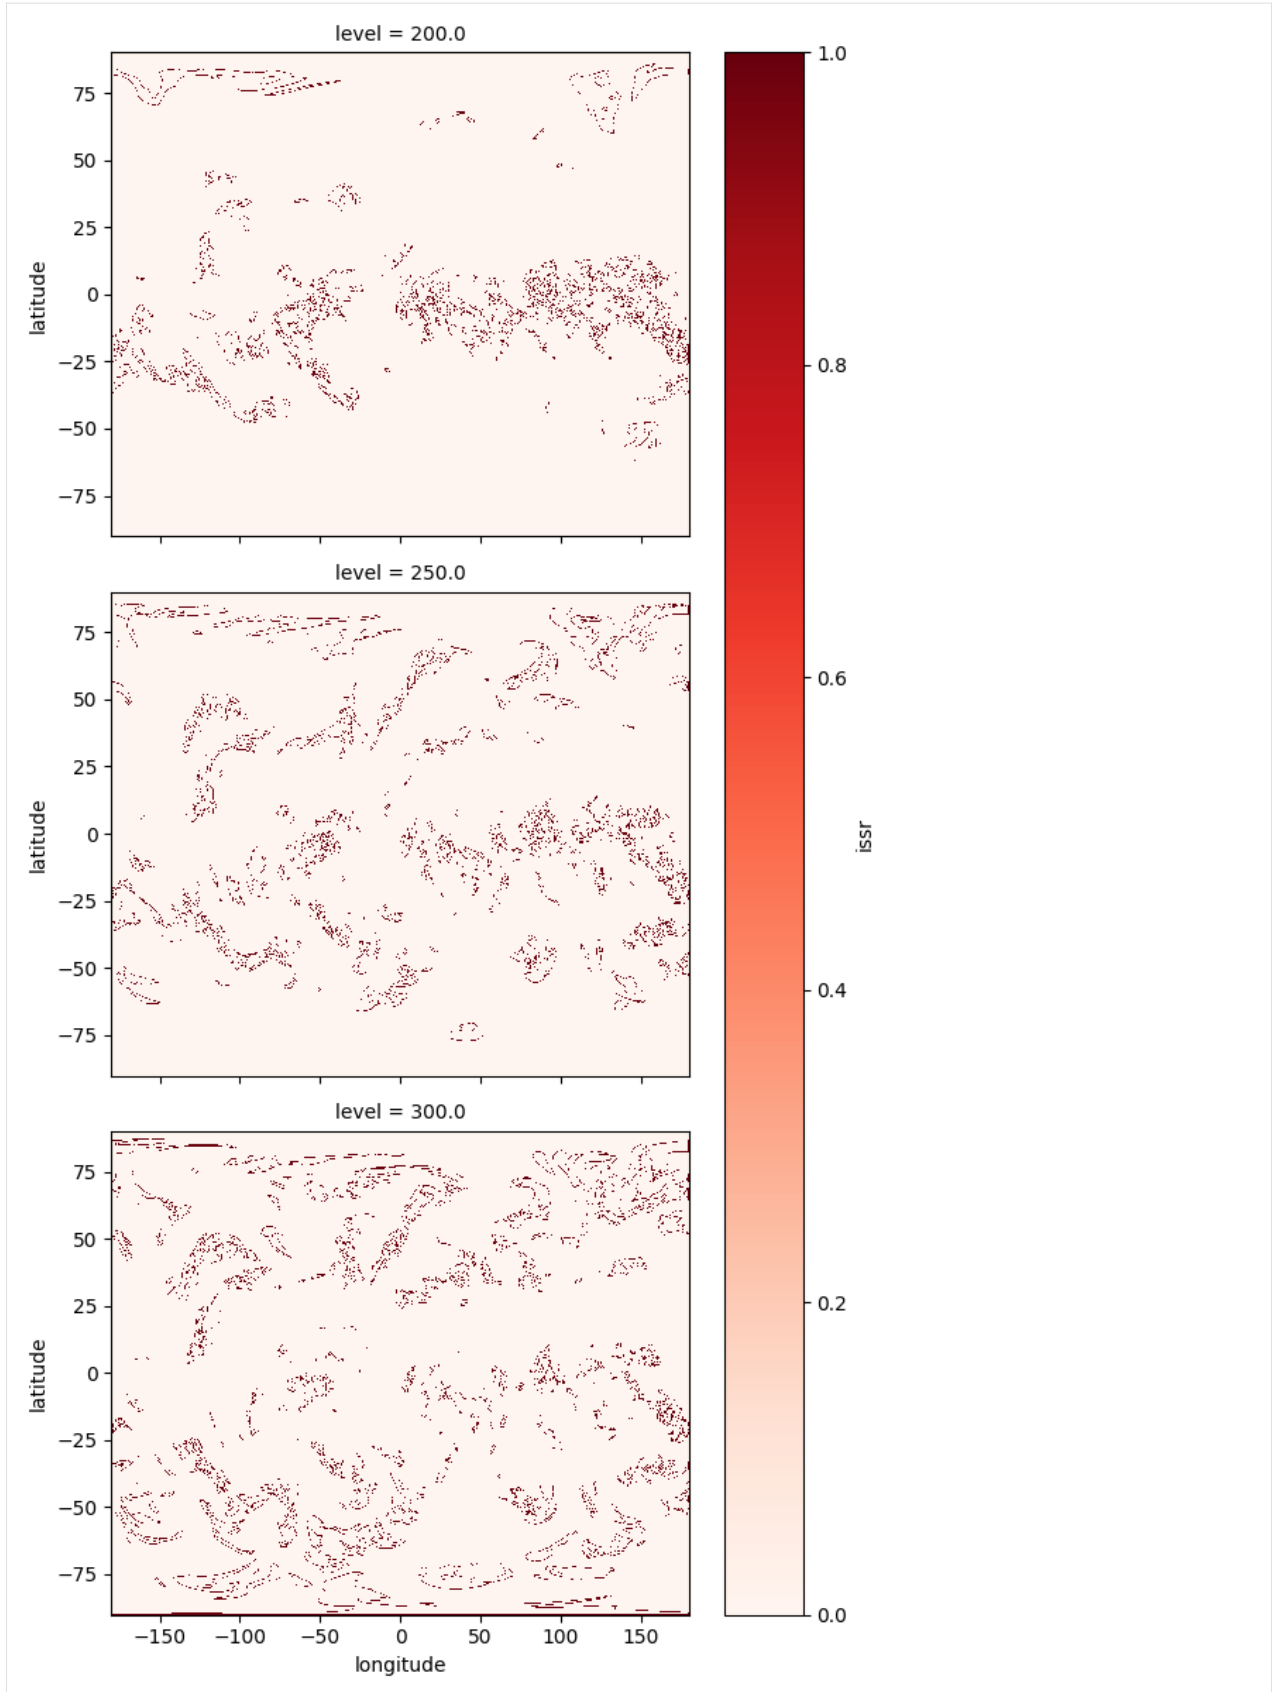

## Interpolate

Run model along a flight path

```
[8]: # Load flight
df = pd.read_csv("data/flight.csv", parse_dates=["time"])
fl = Flight(data=df, flight_id="acdd1b", callsign="AAL1158")

fl
```

```
[8]: Flight [4 keys x 175 length, 3 attributes]
      Keys: longitude, latitude, altitude, time
      Attributes:
      time           [2022-03-01 00:50:00, 2022-03-01 03:47:00]
      longitude      [-97.026, -77.036]
      latitude       [32.931, 38.854]
      altitude       [190.5, 11582.4]
      flight_id      acdd1b
      callsign       AAL1158
      crs            EPSG:4326
```

```
[9]: # run model for across full input domain
      # outputs global ice super-saturated regions as 1, all other regions as 0
      # np.nan is returned outside of the met domain
fl_out = ISSR(met=met).eval(source=fl)
fl_out["issr"]
```

```
[9]: array([[nan, nan,  0., nan, nan,
           0.,  0.,  0.,  0.,  0.,  0.,  0.,  0.,  0.,  0.,  0.,  0.,  0.,
           0.,  0.,  0.,  0.,  0.,  0.,  0.,  0.,  0.,  0.,  0.,  0.,  0.,
           0.,  0.,  0.,  0.,  0.,  0.,  0.,  0.,  0.,  0.,  0.,  0.,  0.,
           0.,  0.,  0.,  0.,  0.,  0.,  0.,  0.,  0.,  0.,  0.,  0.,  0.,
           0.,  0.,  0.,  0.,  0.,  0.,  0.,  0.,  0.,  0.,  0.,  0.,  0.,
           0.,  0.,  0.,  0.,  0.,  0.,  0.,  0.,  0.,  0.,  0.,  0.,  0.,
           0.,  0.,  0.,  0.,  0.,  0.,  0.,  0.,  0.,  0.,  0.,  0.,  0.,
           0.,  0.,  0.,  1.,  1.,  1.,  1.,  1.,  1.,  1.,  1.,  1.,  1.,
           1.,  1.,  1.,  1.,  1.,  1.,  0.,  1., nan, nan, nan, nan,
           nan, nan, nan, nan, nan, nan, nan, nan, nan, nan, nan, nan, nan,
           nan, nan, nan, nan, nan, nan])
```

```
[10]: # Get the length of the Flight in the ISSR region
fl_out.length_met("issr")
```

```
[10]: 190812.60842238227
```

```
[11]: fig, ax = plt.subplots(figsize=(10, 6))

      # Create colormap with red for ISSR and blue for non-ISSR
      cmap = ListedColormap(["b", "r"])

      ax.scatter(fl_out["longitude"], fl_out["latitude"], c=fl_out["issr"], cmap=cmap)
```

(continues on next page)

(continued from previous page)

```
# Create legend
legend_elements = [
    plt.Line2D([0], [0], marker="o", color="w", label="ISSR", markerfacecolor="r",
↳markersize=10),
    plt.Line2D(
        [0], [0], marker="o", color="w", label="non-ISSR", markerfacecolor="b",
↳markersize=10
    ),
]
ax.legend(handles=legend_elements, loc="upper left")

ax.set(xlabel="longitude", ylabel="latitude");
```

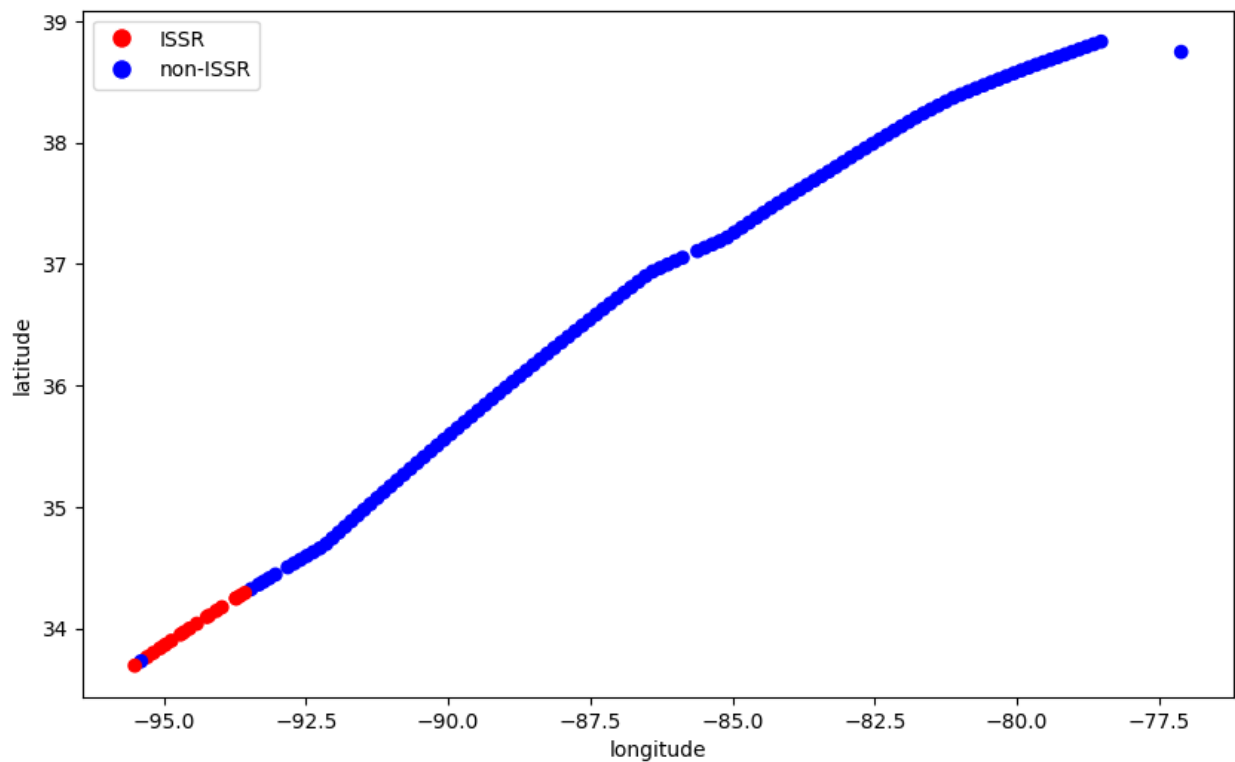

## 6.2 Schmidt-Appleman criterion

Model areas of the atmosphere that satisfy the Schmidt-Appleman criterion (SAC).

## 6.2.1 Met Data

- Requires account with Copernicus Data Portal and local `~/ .cdsapirc` file with credentials.

```
[1]: import pandas as pd

from pycontrails import Flight
from pycontrails.datalib.ecmwf import ERA5
from pycontrails.models.sac import SAC

# ignore pycontrails warning about ECMWF humidity scaling
import warnings

warnings.filterwarnings(message=r"[\s\S]* humidity scaling [\s\S]*", action="ignore")
```

### Get Data

```
[2]: time = ("2022-03-01 00:00:00", "2022-03-01 03:00:00")
pressure_levels = [300, 250, 200]
variables = ["t", "q"] # only temperature and humidity are needed for SAC
```

```
[3]: era5 = ERA5(time=time, variables=variables, pressure_levels=pressure_levels)
met = era5.open_metdataset()
```

### Calculations

```
[4]: # evaluate SAC on met grid
sac_mds = SAC(met=met).eval() # returns a MetDataset
sac = sac_mds["sac"] # extract the SAC MetDataArray

# edge detection algorithm using differentiation to reduce the areas to lines
sac_edges = sac.find_edges()
```

### Figures

```
[5]: # plot sac regions for each pressure level
da = sac.data.isel(time=0)
da.plot(x="longitude", y="latitude", row="level", cmap="Reds", figsize=(6, 12));
```

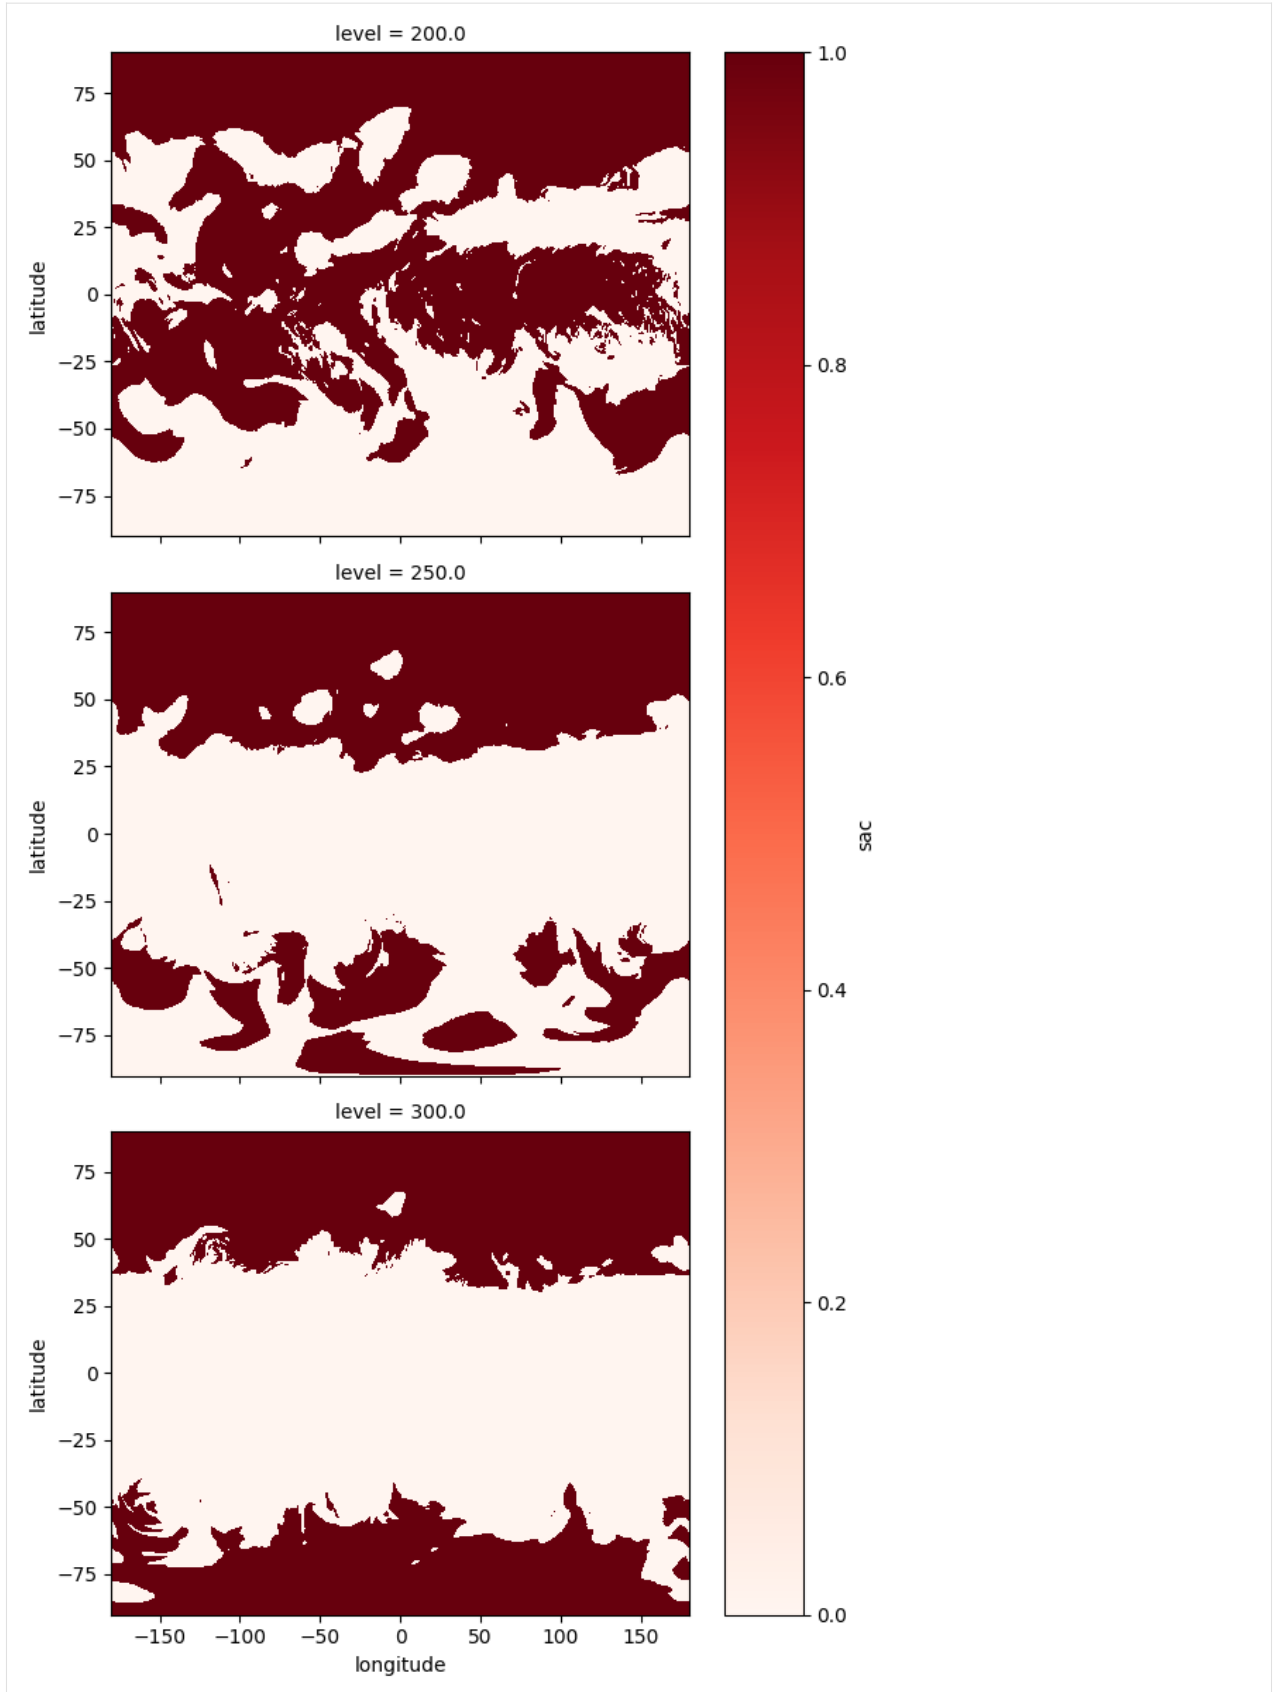

```
[6]: # plot issr edges for each pressure level
da = sac_edges.data.isel(time=0)
da.plot(x="longitude", y="latitude", row="level", cmap="Reds", figsize=(6, 12));
```



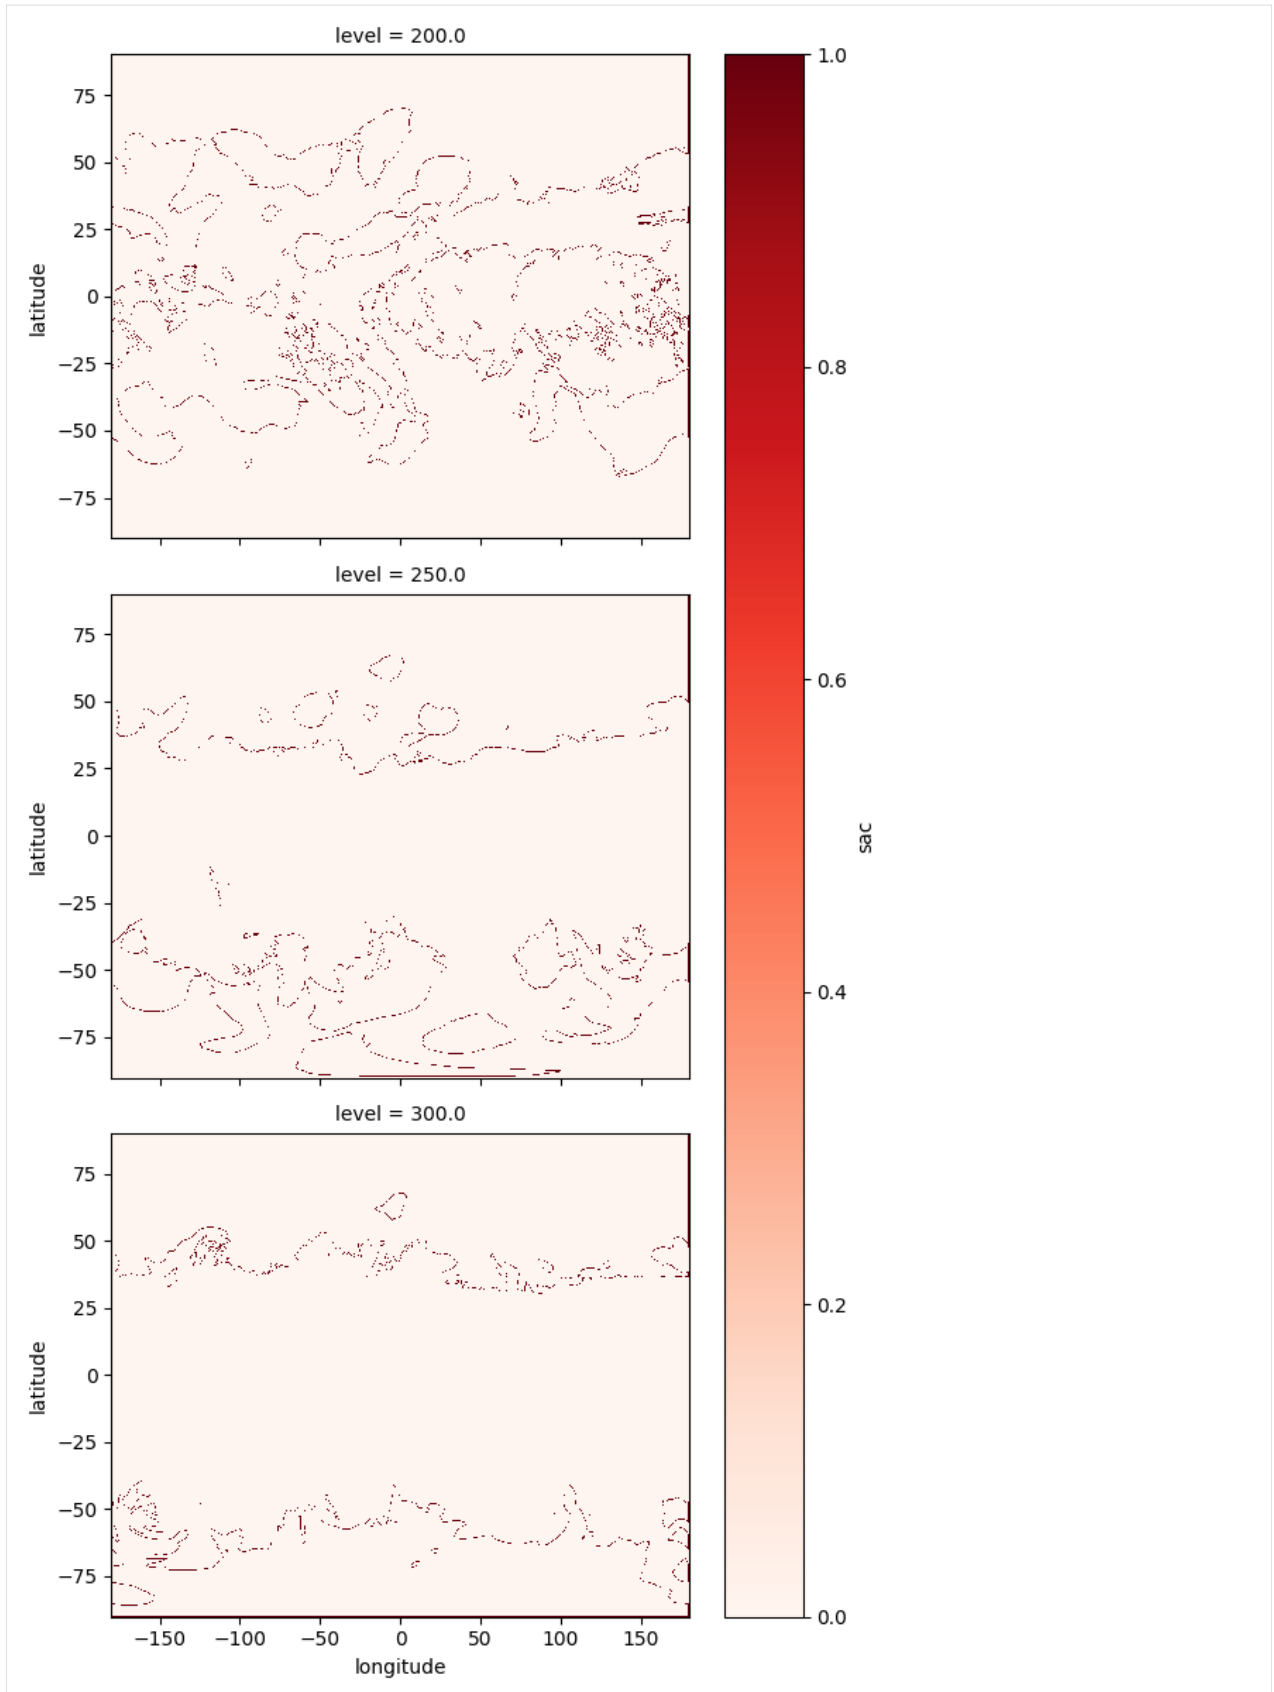



## 6.3 Aircraft Performance

Aircraft performance affects engine emissions and contrail formation.

pycontrails includes built-in support for two aircraft performance models:

- Poll-Schumann Model
- BADA (*Requires pycontrails-bada extension and data files obtained through the BADA license.*)

### 6.3.1 Alternate Models

Aircraft performance can be pre-computed and provided directly to models. Other performance models include:

- OpenAP: Open-source aircraft performance and emissions model
- PianoX: Aircraft design, performance, and emissions tool

Aircraft OEMs and flight planning systems generally have the most accurate performance models.

### 6.3.2 Poll-Schumann Trajectory Model

The Poll-Schumann model was developed to address the need for simple, yet accurate, methods for the estimation of cruise fuel burn and other important aircraft performance parameters.

#### References

- D.I.A. Poll and U. Schumann. An estimation method for the fuel burn and other performance characteristics of civil transport aircraft in the cruise. Part 1 fundamental quantities and governing relations for a general atmosphere. The Aeronautical Journal, 125(1284):257–295, February 2021. doi:10.1017/aer.2020.62.
- D.I.A. Poll and U. Schumann. An estimation method for the fuel burn and other performance characteristics of civil transport aircraft during cruise: part 2, determining the aircraft's characteristic parameters. The Aeronautical Journal, 125(1284):296–340, February 2021. doi:10.1017/aer.2020.124.

```
[1]: import pandas as pd

from pycontrails import Flight
from pycontrails.physics import units

from pycontrails.models.ps_model import PSFlight

[2]: # load flight
attrs = {"flight_id": "1", "aircraft_type": "A320"}
flight = Flight(data=pd.read_csv("data/flight-ap.csv"), attrs=attrs)

# select waypoints between initial climb and final descent
flight = flight.filter(flight["altitude"] > units.ft_to_m(33000))

# Estimate temperature using ISA
flight["air_temperature"] = units.m_to_T_isa(flight["altitude"])

# Estimate airspeed by using groundspeed
flight["true_airspeed"] = flight.segment_groundspeed()
```

```
[3]: # Create PS Flight model and evaluate
ps_model = PSFlight()
out = ps_model.eval(flight)
```

```
[4]: # Visualize outputs
out.dataframe.plot(x="time", y="aircraft_mass")
out.dataframe.plot(x="time", y="engine_efficiency")
out.dataframe.plot(x="time", y="fuel_flow")
out.dataframe.plot(x="time", y="thrust");
```

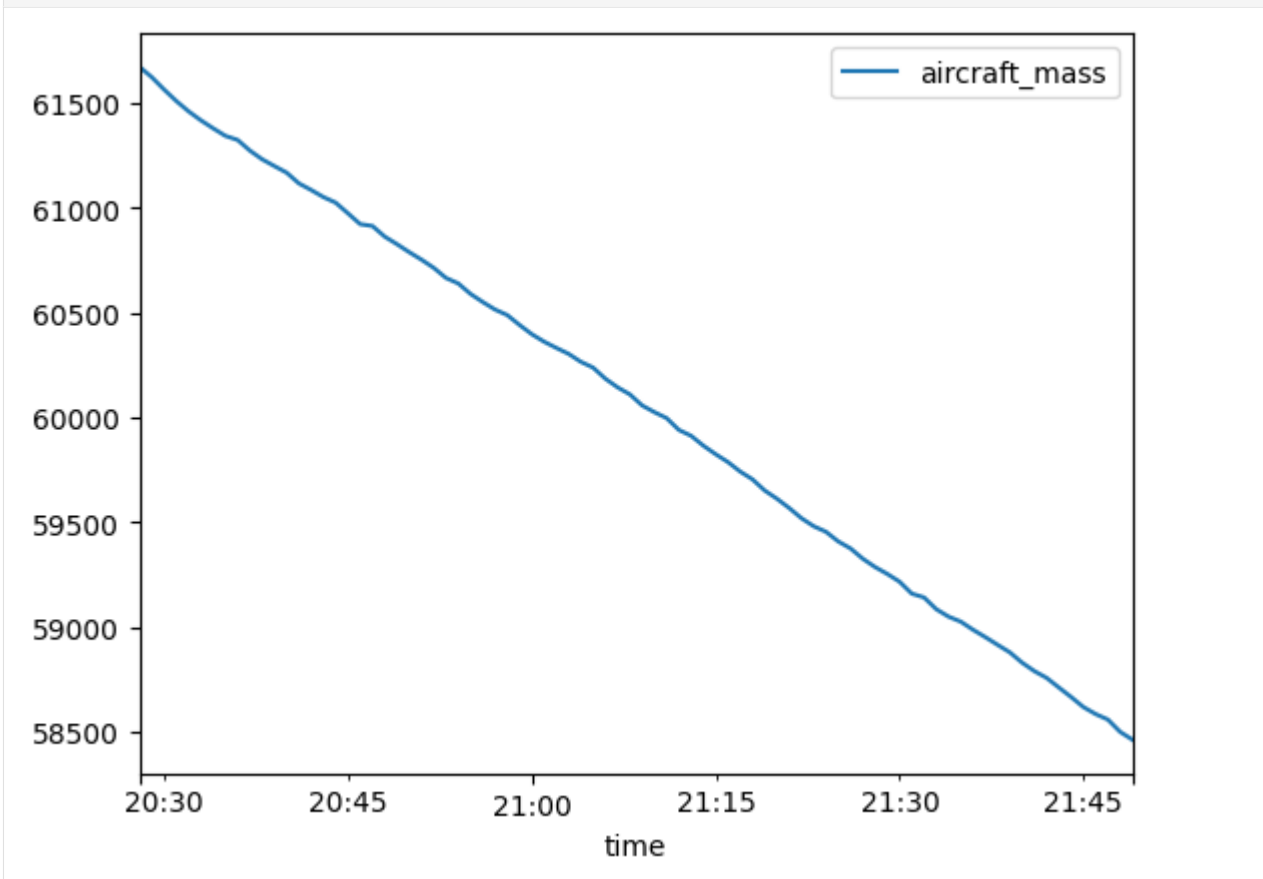

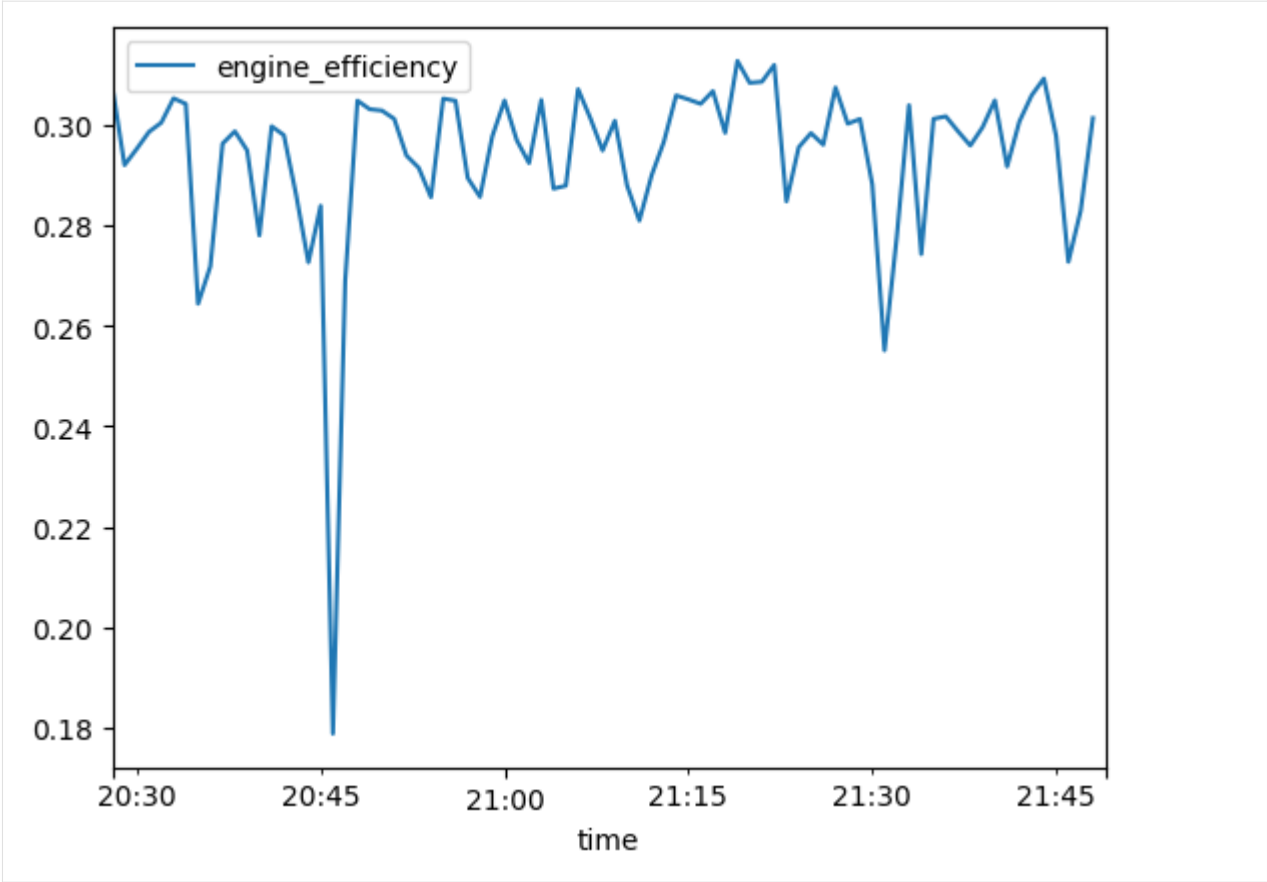

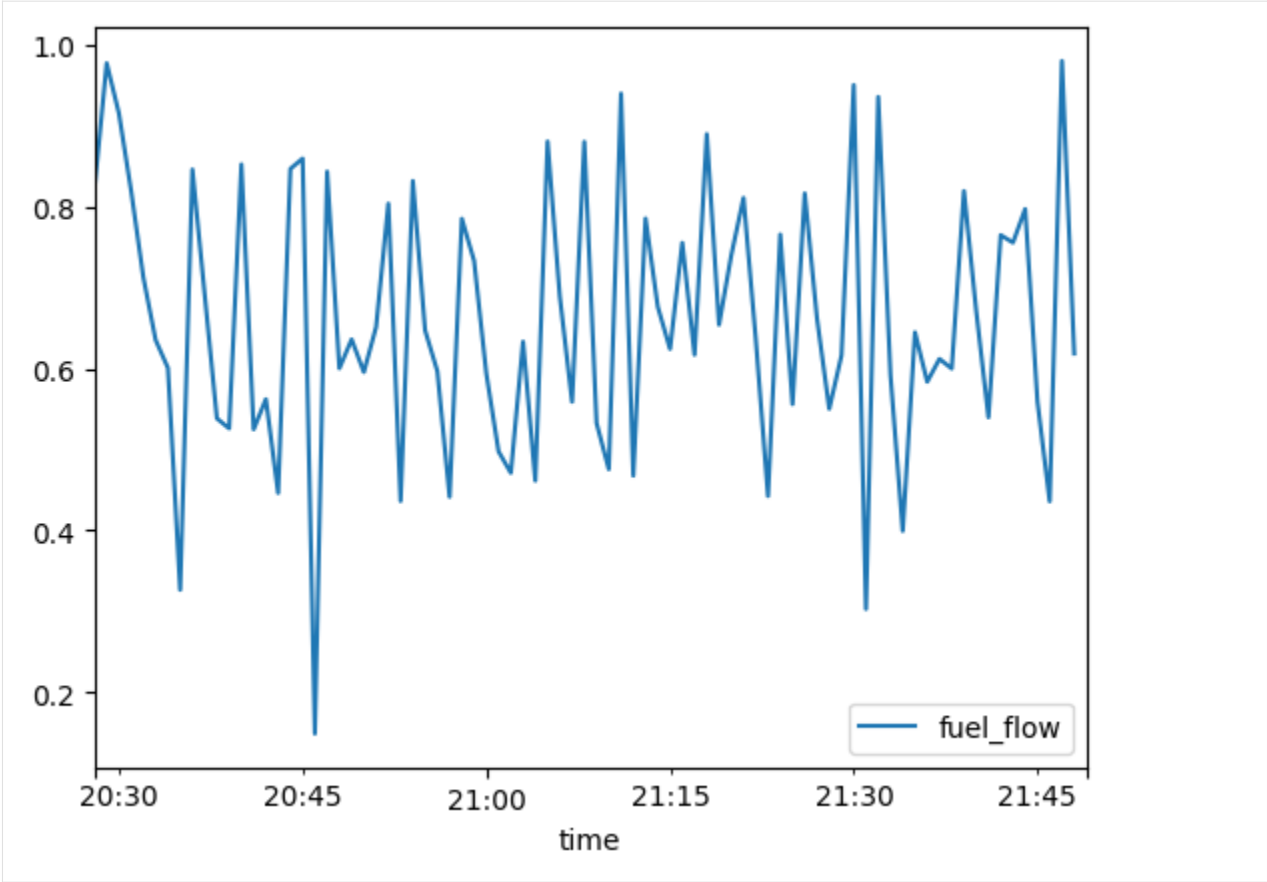

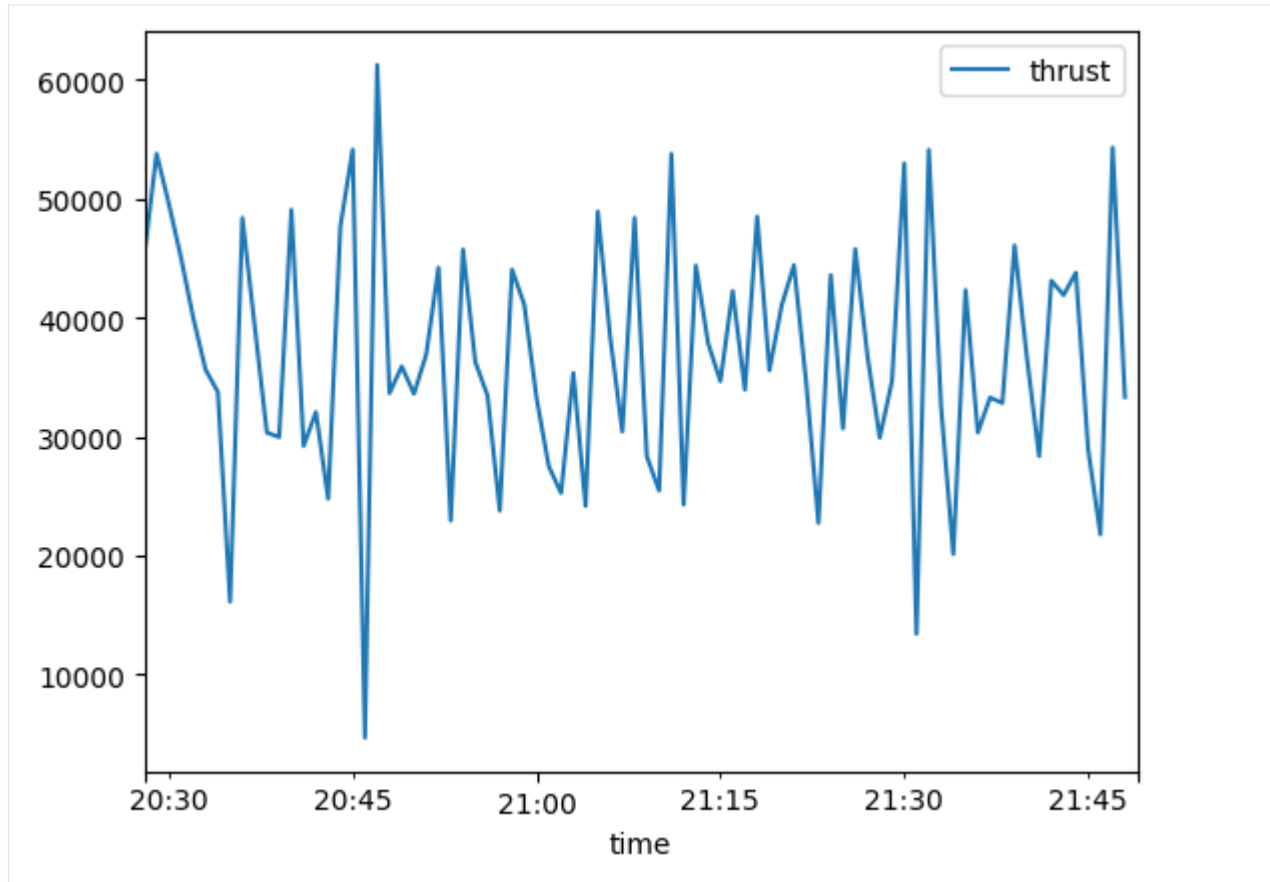

### 6.3.3 Poll-Schumann Grid Model

The PSGrid model exists to compute nominal Poll-Schumann aircraft performance on a meteorological grid.

#### Goal

For a given aircraft type, altitude, aircraft mass, air temperature, and mach number, the PS model computes a theoretical engine efficiency and fuel flow rate for an aircraft under cruise conditions. Letting the aircraft mass vary and fixing the other parameters, the engine efficiency curve attains a single maximum at a particular aircraft mass. By solving this implicit equation, the PS model can be used to compute the aircraft mass that maximizes engine efficiency for a given set of parameters. This is the “nominal” aircraft mass computed by this model.

This nominal aircraft mass is not always realizable. For example, the maximum engine efficiency may be attained at an aircraft mass that is less than the operating empty mass of the aircraft. This model determines the minimum and maximum possible aircraft mass for a given set of parameters using a simple heuristic. The nominal aircraft mass is then clipped to this range.

```
[5]: from matplotlib import pyplot as plt
      from pycontrails.datalib.ecmwf import ERA5
      from pycontrails.models.ps_model import PSGrid
```

```
[6]: # load meteorology data
time = "2022-03-01 07:00:00"
pressure_levels = [250]
variables = ["air_temperature"]

era5 = ERA5(time=time, variables=variables, pressure_levels=pressure_levels)
met = era5.open_metdataset()
```

```
[7]: # Run PSGrid model
model = PSGrid(met, aircraft_type="A320")
out = model.eval()
```

```
[8]: out["aircraft_mass"].data.plot(x="longitude", y="latitude")
plt.title(f"Nominal aircraft mass [kg]\n at pressure level {out.data['level'].values[0]}\n ↪hPa");
```

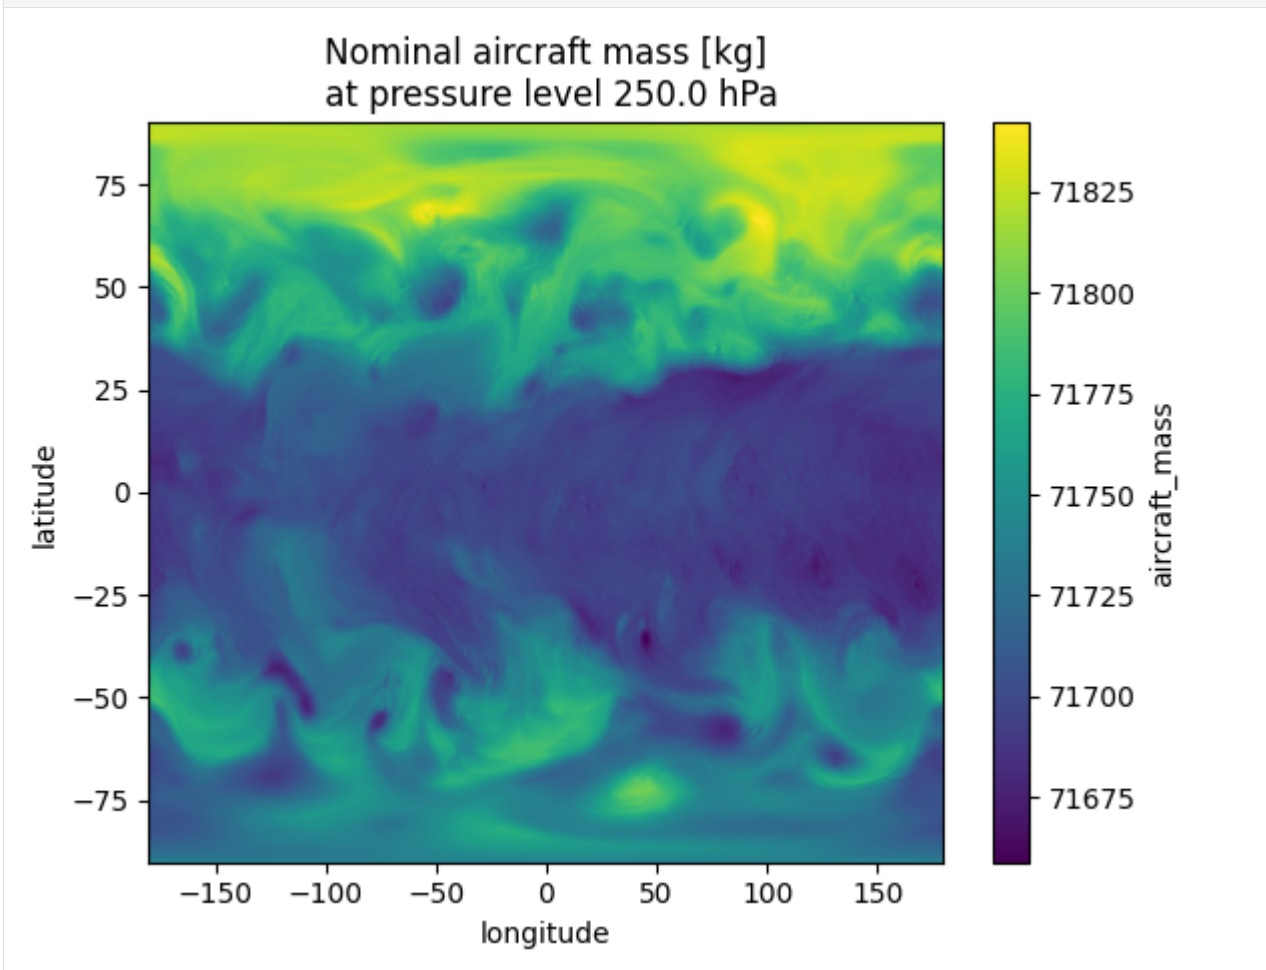

```
[9]: out["fuel_flow"].data.plot(x="longitude", y="latitude")
plt.title(f"Nominal fuel flow [kg/s]\n at pressure level {out.data['level'].values[0]}\n ↪hPa");
```



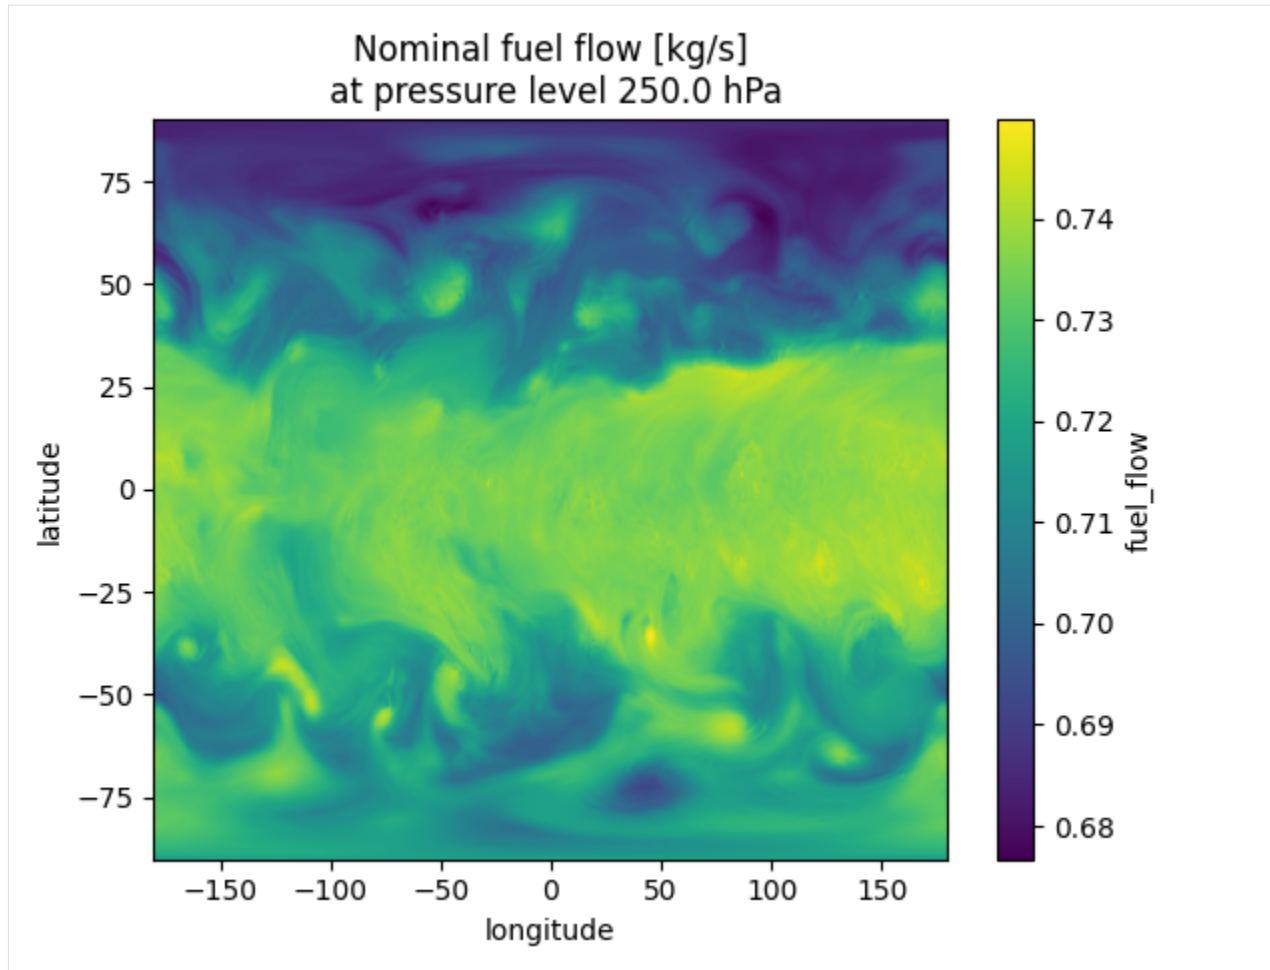

## 6.4 CoCiP

Contrail Cirrus Prediction (CoCiP) model evaluation along a flight trajectory.

### 6.4.1 References

- Schumann, U. “A Contrail Cirrus Prediction Model.” *Geoscientific Model Development* 5, no. 3 (May 3, 2012): 543–80. <https://doi.org/10.5194/gmd-5-543-2012>.
- Schumann, U., B. Mayer, K. Graf, and H. Mannstein. “A Parametric Radiative Forcing Model for Contrail Cirrus.” *Journal of Applied Meteorology and Climatology* 51, no. 7 (July 2012): 1391–1406. <https://doi.org/10.1175/JAMC-D-11-0242.1>.
- Schumann, Ulrich, Robert Baumann, Darrel Baumgardner, Sarah T. Bedka, David P. Duda, Volker Freudenthaler, Jean-Francois Gayet, et al. 2017. “Properties of Individual Contrails: A Compilation of Observations and Some Comparisons.” *Atmospheric Chemistry and Physics* 17 (1): 403–38. <https://doi.org/10.5194/acp-17-403-2017>.
- Teoh, Roger, Ulrich Schumann, Arnab Majumdar, and Marc E. J. Stettler. “Mitigating the Climate Forcing of Aircraft Contrails by Small-Scale Diversions and Technology Adoption.” *Environmental Science & Technology* 54, no. 5 (March 3, 2020): 2941–50. <https://doi.org/10.1021/acs.est.9b05608>.

- Teoh, Roger, Ulrich Schumann, Edward Gryspeerd, Marc Shapiro, Jarlath Molloy, George Koudis, Christiane Voigt, and Marc E. J. Stettler. 2022. “Aviation Contrail Climate Effects in the North Atlantic from 2016 to 2021.” *Atmospheric Chemistry and Physics* 22 (16): 10919–35. <https://doi.org/10.5194/acp-22-10919-2022>.
- Teoh, Roger, Ulrich Schumann, Christiane Voigt, Tobias Schripp, Marc Shapiro, Zebediah Engberg, Jarlath Molloy, George Koudis, and Marc E. J. Stettler. 2022. “Targeted Use of Sustainable Aviation Fuel to Maximize Climate Benefits.” *Environmental Science & Technology*, November. <https://doi.org/10.1021/acs.est.2c05781>.

```
[1]: import numpy as np
import pandas as pd
from matplotlib import pyplot as plt

from pycontrails import Flight, MetDataset
from pycontrails.datalib.ecmwf import ERA5
from pycontrails.models.cocip import (
    Cocip,
    flight_waypoint_summary_statistics,
    contrail_flight_summary_statistics,
    natural_cirrus_properties_to_hi_res_grid,
)
from pycontrails.models.humidity_scaling import ConstantHumidityScaling

plt.rcParams["figure.figsize"] = (10, 6)
```

## 6.4.2 Download meteorology data from ECMWF

This demo uses ERA5 via the Copernicus Data Store (CDS) for met data. This requires account with Copernicus Data Portal and local `~/.cdsapirc` file with credentials.

Note this will download ~1 GB of meteorology data to your computer

```
[2]: time_bounds = ("2022-03-01 00:00:00", "2022-03-01 23:00:00")
pressure_levels = (300, 250, 200)
```

```
[3]: era5pl = ERA5(
    time=time_bounds,
    variables=Cocip.met_variables + Cocip.optional_met_variables,
    pressure_levels=pressure_levels,
)
era5sl = ERA5(time=time_bounds, variables=Cocip.rad_variables)
```

```
[4]: # download data from ERA5 (or open from cache)
met = era5pl.open_metdataset()
rad = era5sl.open_metdataset()
```

### 6.4.3 Load Flight Data

Flight can be loaded from CSV, parquet, or created from a pandas DataFrame

```
[5]: # demo synthetic flight
flight_attrs = {
    "flight_id": "test",
    # set constants along flight path
    "true_airspeed": 226.099920796651, # true airspeed, m/s
    "thrust": 0.22, # thrust_setting
    "nvpm_ei_n": 1.897462e15, # non-volatile emissions index
    "aircraft_type": "E190",
    "wingspan": 48, # m
    "n_engine": 2,
}

# Example flight
df = pd.DataFrame()
df["longitude"] = np.linspace(-25, -40, 100)
df["latitude"] = np.linspace(34, 40, 100)
df["altitude"] = np.linspace(10900, 10900, 100)
df["engine_efficiency"] = np.linspace(0.34, 0.35, 100)
df["fuel_flow"] = np.linspace(2.1, 2.4, 100) # kg/s
df["aircraft_mass"] = np.linspace(154445, 154345, 100) # kg
df["time"] = pd.date_range("2022-03-01T00:15:00", "2022-03-01T02:30:00", periods=100)

flight = Flight(df, attrs=flight_attrs)
flight
```

```
[5]: Flight [7 keys x 100 length, 8 attributes]
      Keys: longitude, latitude, altitude, engine_efficiency, fuel_flow, ..., time
      Attributes:
      time                [2022-03-01 00:15:00, 2022-03-01 02:30:00]
      longitude           [-40.0, -25.0]
      latitude            [34.0, 40.0]
      altitude            [10900.0, 10900.0]
      flight_id           test
      true_airspeed       226.099920796651
      thrust              0.22
      nvpm_ei_n           1897462000000000.0
      aircraft_type       E190
      wingspan            48
      n_engine            2
      crs                 EPSG:4326
```

## 6.4.4 Run Cocip on a single flight

In this first example, the Flight has aircraft performance (i.e. `nvpm_ei_n`) hardcoded into the data as constants. This data is assumed to be constant at every flight waypoint.

### Caveat

- When the Cocip model is run on one Flight, the default behavior is to **downselect the meteorology** to a region surrounding the flight and **process the meteorology** (i.e. humidity scaling, `tau_cirrus`) on the smaller domain. The implications of this processing is each instance of a single-flight Cocip model should *only be run once*.
- We ignore the warning here about humidity scaling for ECMWF data sources

```
[6]: params = {
      "dt_integration": np.timedelta64(10, "m"),
      # The humidity_scaling parameter is only used for ECMWF ERA5 data
      # based on Teoh 2020 and Teoh 2022 - https://acp.copernicus.org/preprints/acp-2022-
      ↪169/acp-2022-169.pdf
      # Here we use an example of constantly scaling the humidity value by 0.99
      "humidity_scaling": ConstantHumidityScaling(rhi_adj=0.99),
    }
    cocip = Cocip(met=met, rad=rad, params=params)
```

```
[7]: output_flight = cocip.eval(source=flight)
```

## 6.4.5 Explore Flight Output

The `output_flight` object holds roughly 50 variables of interest. The energy forcing `ef` field is a primary model output. Waypoints not producing persistent contrails are assigned an `ef` value of 0.

```
[8]: df = output_flight.dataframe
      df.head()
```

```
[8]:
```

| waypoint | longitude    | latitude  | altitude | engine_efficiency | fuel_flow | \ |
|----------|--------------|-----------|----------|-------------------|-----------|---|
| 0        | 0 -25.000000 | 34.000000 | 10900.0  | 0.340000          | 2.100000  |   |
| 1        | 1 -25.151515 | 34.060606 | 10900.0  | 0.340101          | 2.103030  |   |
| 2        | 2 -25.303030 | 34.121212 | 10900.0  | 0.340202          | 2.106061  |   |
| 3        | 3 -25.454545 | 34.181818 | 10900.0  | 0.340303          | 2.109091  |   |
| 4        | 4 -25.606061 | 34.242424 | 10900.0  | 0.340404          | 2.112121  |   |

  

| aircraft_mass   | time                          | flight_id | level      | ... | \ |
|-----------------|-------------------------------|-----------|------------|-----|---|
| 0 154445.000000 | 2022-03-01 00:15:00.000000000 | test      | 229.908663 | ... |   |
| 1 154443.989899 | 2022-03-01 00:16:21.818181818 | test      | 229.908663 | ... |   |
| 2 154442.979798 | 2022-03-01 00:17:43.636363636 | test      | 229.908663 | ... |   |
| 3 154441.969697 | 2022-03-01 00:19:05.454545454 | test      | 229.908663 | ... |   |
| 4 154440.959596 | 2022-03-01 00:20:27.272727272 | test      | 229.908663 | ... |   |

  

| n_ice_per_m_1  | ef  | contrail_age | sdr_mean | rsr_mean | olr_mean | rf_sw_mean | \ |
|----------------|-----|--------------|----------|----------|----------|------------|---|
| 0 1.211936e+13 | 0.0 | 0 days       | NaN      | NaN      | NaN      | NaN        |   |
| 1 1.299153e+13 | 0.0 | 0 days       | NaN      | NaN      | NaN      | NaN        |   |
| 2 1.363941e+13 | 0.0 | 0 days       | NaN      | NaN      | NaN      | NaN        |   |
| 3 1.410562e+13 | 0.0 | 0 days       | NaN      | NaN      | NaN      | NaN        |   |
| 4 1.438106e+13 | 0.0 | 0 days       | NaN      | NaN      | NaN      | NaN        |   |

(continues on next page)

(continued from previous page)

|   | rf_lw_mean | rf_net_mean | cocip |
|---|------------|-------------|-------|
| 0 | NaN        | NaN         | 0.0   |
| 1 | NaN        | NaN         | 0.0   |
| 2 | NaN        | NaN         | 0.0   |
| 3 | NaN        | NaN         | 0.0   |
| 4 | NaN        | NaN         | 0.0   |

[5 rows x 45 columns]

```
[9]: df.plot.scatter(
      x="longitude",
      y="latitude",
      c="ef",
      cmap="coolwarm",
      vmin=-1e13,
      vmax=1e13,
      title="EF generated by flight waypoint",
    );
```

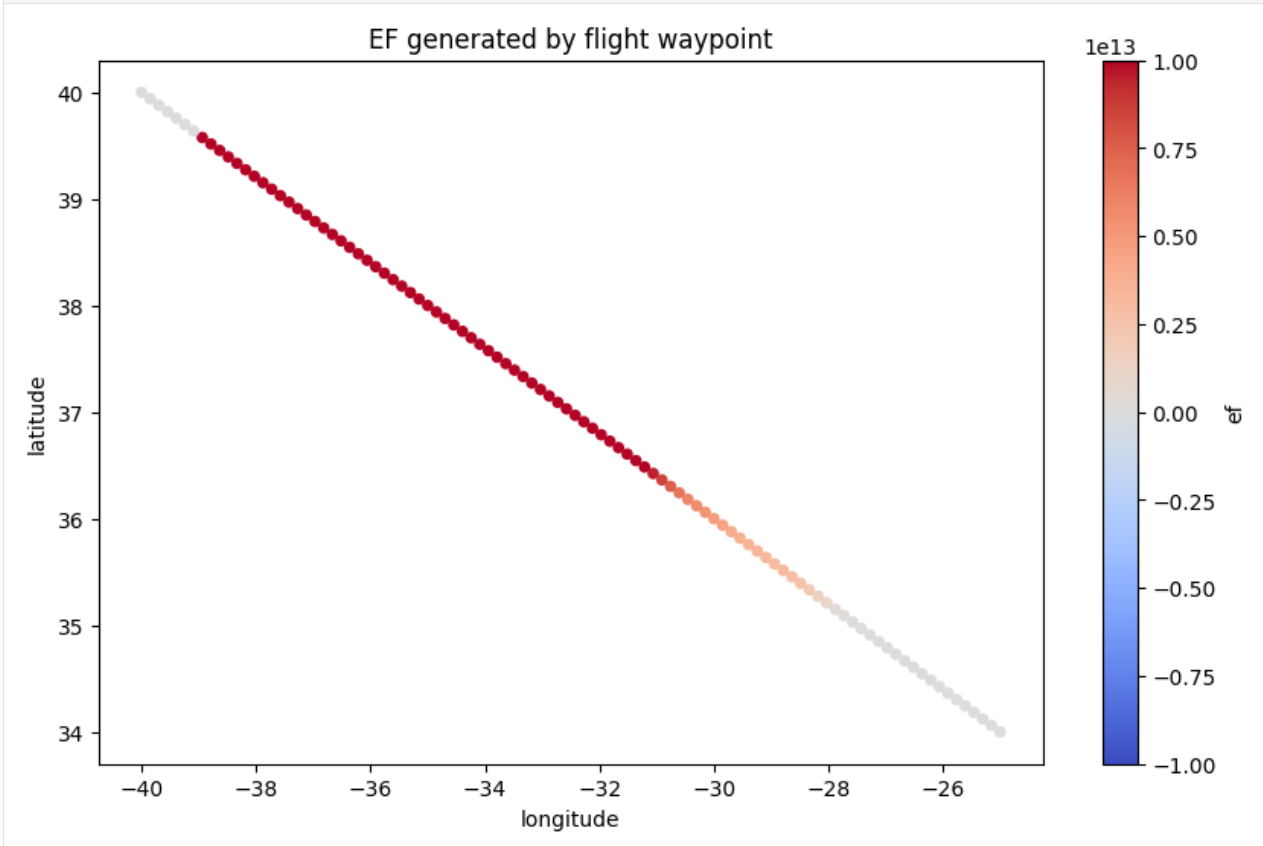

```
[10]: df.plot.scatter(
      x="longitude",
      y="latitude",
      c="rhi_1",
      cmap="magma",
      title="Initial RHi along flight path",
```

(continues on next page)

(continued from previous page)

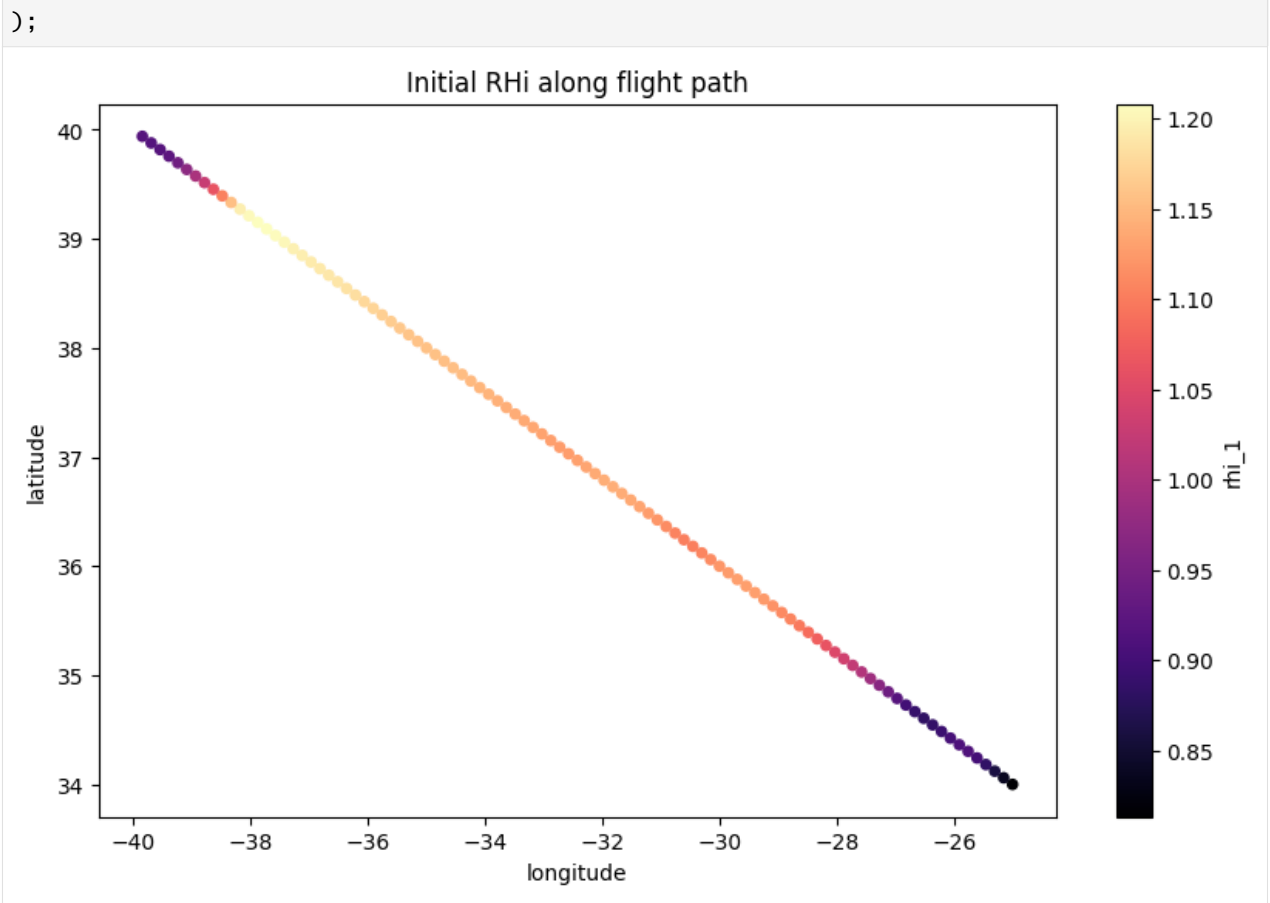

### 6.4.6 Explore Contrail Output

- The `cocip.contrail` attribute is a `pandas.DataFrame` [reference/api/pandas.DataFrame.html](https://pandas.pydata.org/pandas-docs/stable/reference/api/pandas.DataFrame.html) representation of the contrail waypoints.
- The `cocip.contrail_dataset` attribute is a `xarray.Dataset` [reference/api/xarray.Dataset.html](https://xarray.pydata.org/en/stable/generated/xarray.Dataset.html) representation of the contrail waypoints.

```
[11]: contrail = cocip.contrail
contrail.head()
```

```
[11]:   waypoint flight_id      formation_time      time \
0      16      test 2022-03-01 00:36:49.090909090 2022-03-01 00:40:00
1      17      test 2022-03-01 00:38:10.909090909 2022-03-01 00:40:00
2      18      test 2022-03-01 00:39:32.727272727 2022-03-01 00:40:00
0      17      test 2022-03-01 00:38:10.909090909 2022-03-01 00:50:00
1      18      test 2022-03-01 00:39:32.727272727 2022-03-01 00:50:00

      age longitude  latitude  altitude  level \
0 0 days 00:03:10.909090910 -27.378049  34.922418  10855.165152  231.533890
1 0 days 00:01:49.090909091 -27.548832  35.003469  10855.511035  231.521316
2      0 days 00:00:00 -27.720407  35.084249  10855.340639  231.527510
0 0 days 00:11:49.090909091 -27.401596  34.855488  10855.704079  231.514299
```

(continues on next page)

(continued from previous page)

```

1 0 days 00:10:27.272727273 -27.569577 34.937639 10857.240565 231.458453

    continuous ... tau_contrail    dn_dt_agg  dn_dt_turb  rf_sw    rf_lw  \
0      True ...    0.058053  7.476665e-20    0.000051    0.0  0.555465
1      True ...    0.165581  2.538742e-19    0.000077    0.0  1.976229
2     False ...    0.408836  4.056703e-19    0.000233    0.0  4.600390
0      True ...    0.036824  9.873238e-20    0.000026    0.0  0.561865
1      True ...    0.047199  2.494850e-19    0.000030    0.0  0.854236

    rf_net  persistent      ef  timestep  age_hours
0  0.555465      True  1.099225e+09      2    0.053030
1  1.976229      True  9.428853e+08      2    0.030303
2  4.600390      True  0.000000e+00      2    0.000000
0  0.561865      True  7.060254e+09      3    0.196970
1  0.854236      True  8.330392e+09      3    0.174242

```

```
[5 rows x 56 columns]
```

```

[12]: ax = plt.axes()

cocip.source.dataframe.plot(
    "longitude",
    "latitude",
    color="k",
    ax=ax,
    label="Flight path",
)
cocip.contrail.plot.scatter(
    "longitude",
    "latitude",
    c="rf_lw",
    cmap="Reds",
    ax=ax,
    label="Contrail LW RF",
)
ax.legend();

```

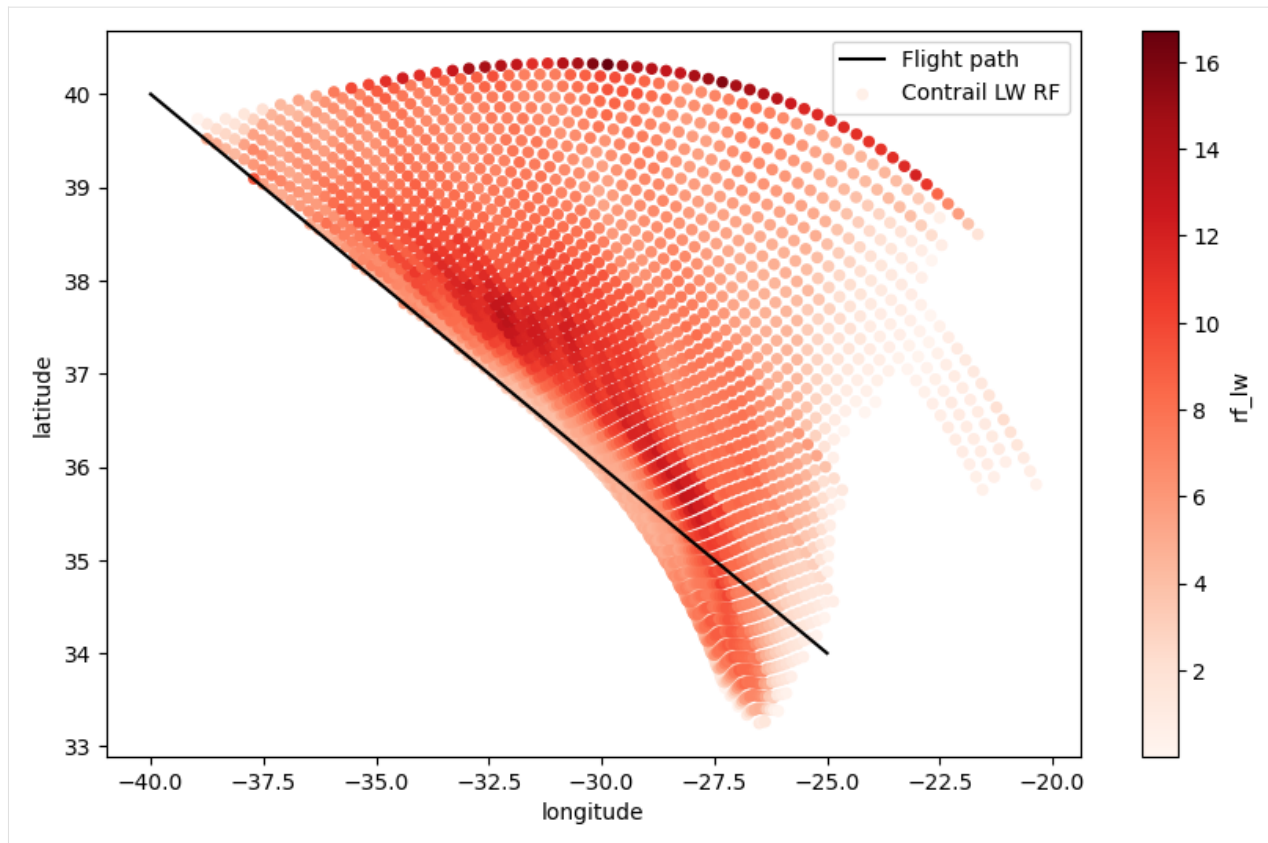

```
[13]: ax = plt.axes()

cocip.source.dataframe.plot(
    "longitude",
    "latitude",
    color="k",
    ax=ax,
    label="Flight path",
)
cocip.contrail.plot.scatter(
    "longitude",
    "latitude",
    c="ef",
    cmap="coolwarm",
    vmin=-1e12,
    vmax=1e12,
    ax=ax,
    label="Contrail EF",
)
ax.legend();
```



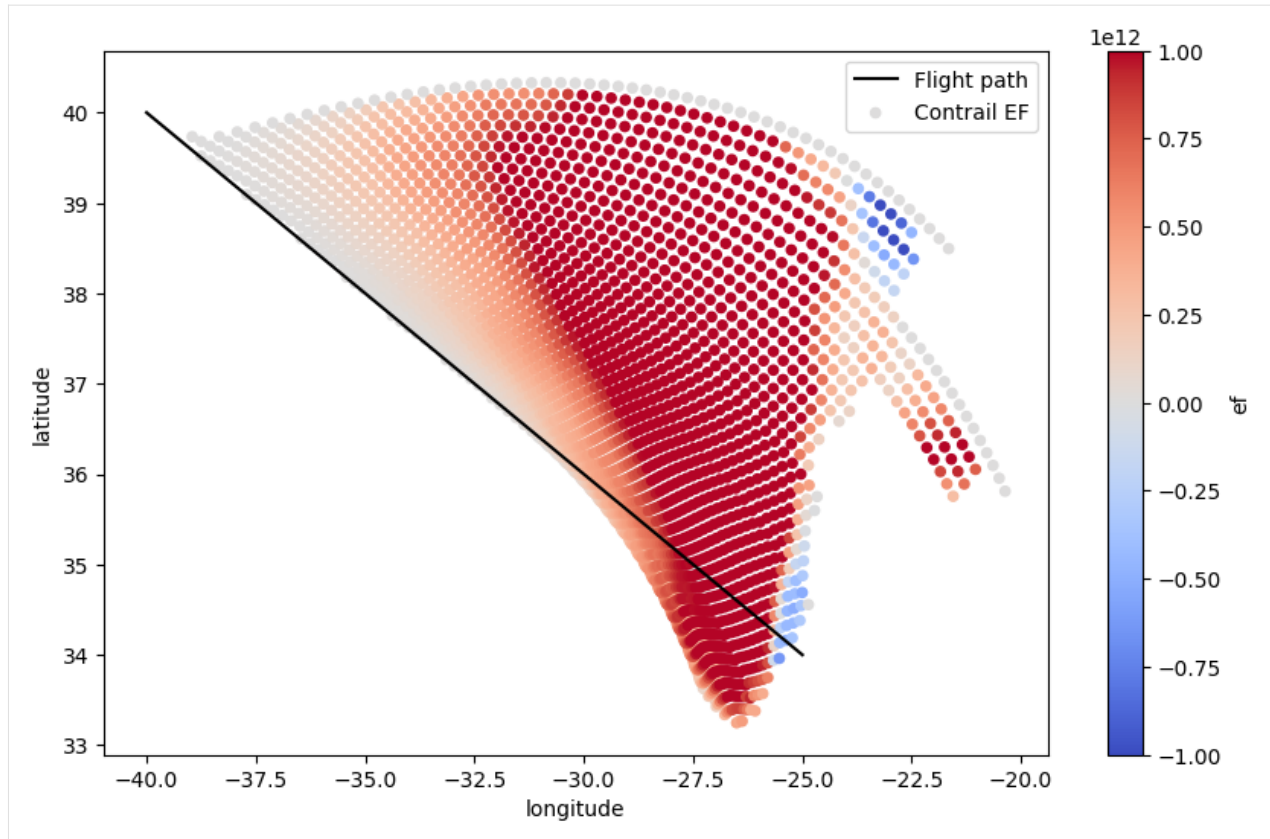

## 6.4.7 Explore Flight Summary

A curated set of statistics available after a Flight has been run through eval

```
[14]: # flight_statistics = cocip.output_flight_statistics()
# flight_statistics

waypoint_summary = flight_waypoint_summary_statistics(cocip.source, cocip.contrail)
flight_summary = contrail_flight_summary_statistics(waypoint_summary)
flight_summary
```

```
[14]: flight_id total_flight_distance_flown total_contrails_formed \
0 test 1.489373e+06 1.489373e+06

total_persistent_contrails_formed mean_lifetime_contrail_altitude \
0 1.489373e+06 10924.967626

mean_lifetime_rhi mean_lifetime_n_ice_per_m mean_lifetime_r_ice_vol \
0 1.115407 9.352614e+12 0.000006

mean_lifetime_contrail_width mean_lifetime_contrail_depth ... \
0 15384.89933 535.5604 ...

mean_lifetime_tau_cirrus mean_contrail_lifetime max_contrail_lifetime \
0 0.251802 5.364979 10.583333
```

(continues on next page)

(continued from previous page)

```
mean_lifetime_rf_sw mean_lifetime_rf_lw mean_lifetime_rf_net \
0          -0.157952          5.550725          5.392773

total_energy_forcing mean_lifetime_olr mean_lifetime_sdr \
0          2.340121e+15          192.821976          22.198721

mean_lifetime_rsr
0          9.819747

[1 rows x 21 columns]
```

## 6.4.8 Run Cocip on Multiple Flights

Run multiple Flight inputs on a single set of meteorology.

For this demo, we'll copy the original flight and tweak its longitude and latitudes values.

```
[15]: flights = []
      for i in range(10):
          fl = flight.copy()
          fl.attrs.update(flight_id=f"test-{i:02d}")
          fl.update(latitude=flight["latitude"] + i)
          fl.update(longitude=flight["longitude"] + i)
          flights.append(fl)

[16]: # Visualize the fleet of 10 flights
      ax = plt.axes()
      for fl in flights:
          fl.plot(ax=ax)
```

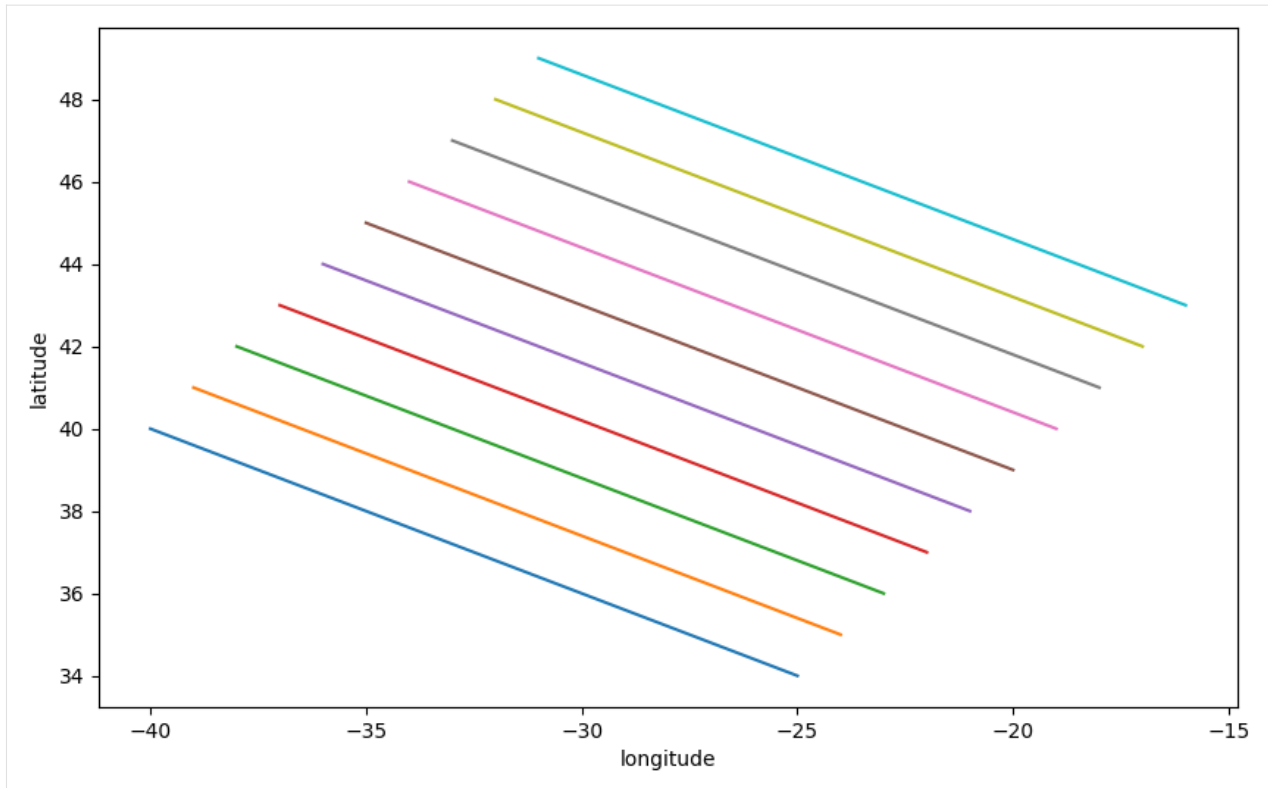

Run the Cocip model over a list[Flight] objects

```
[17]: cocip = Cocip(
    met=met,
    rad=rad,
    process_emissions=False,
    humidity_scaling=ConstantHumidityScaling(rhi_adj=0.99),
)

# returns list of Flight outputs
output_flights = cocip.eval(source=flights)
```

```
[18]: # print EF for each flight
for fl in output_flights:
    print(f"{fl.attrs['flight_id']}: {np.sum(fl['ef'])}")

test-00: 2121480685044636.5
test-01: 1541994819791262.5
test-02: 1319374480518468.0
test-03: 703275057307035.0
test-04: 637174779003.3167
test-05: 4260062451.204625
test-06: 0.0
test-07: 0.0
test-08: 0.0
test-09: 0.0
```

```
[19]: # Visualize the "ef" of each flight
ax = plt.axes()
for fl in output_flights:
    fl.dataframe.plot.scatter(
        x="longitude",
        y="latitude",
        c="ef",
        cmap="coolwarm",
        vmin=-3e13,
        vmax=3e13,
        title="EF generated by waypoint",
        ax=ax,
        colorbar=False,
    );
```

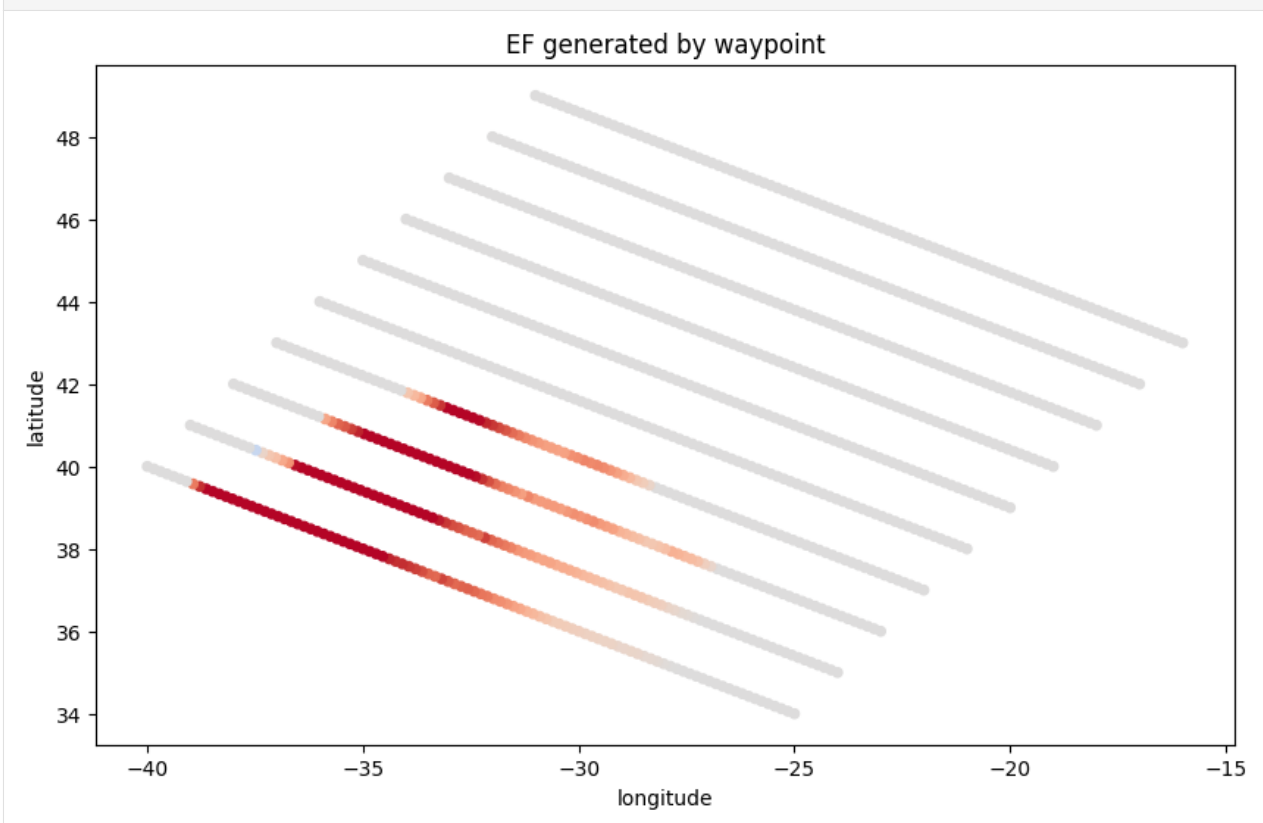

### 6.4.9 Use the Poll-Schumann aircraft performance model

First create a Flight that does not have emissions data associated:

```
[20]: # demo synthetic flight
flight_attrs = {
    "flight_id": "test-ps-model",
    "aircraft_type": "E195",
}

# Example flight
```

(continues on next page)

(continued from previous page)

```
df = pd.DataFrame()
df["longitude"] = np.linspace(-40, -55, 100)
df["latitude"] = np.linspace(38, 45, 100)
df["altitude"] = np.linspace(10900, 10900, 100)
df["time"] = pd.date_range("2022-03-01T00:15:00", "2022-03-01T02:30:00", periods=100)
fl = Flight(data=df, attrs=flight_attrs)
```

```
[21]: from pycontrails.models.ps_model import PSFlight
```

```
[22]: cocip = Cocip(
    met=met,
    rad=rad,
    humidity_scaling=ConstantHumidityScaling(rhi_adj=0.99),
    aircraft_performance=PSFlight(),
)

output_flight = cocip.eval(source=fl)
```

```
[23]: output_flight.dataframe.plot(x="time", y="nvpm_ei_n");
```

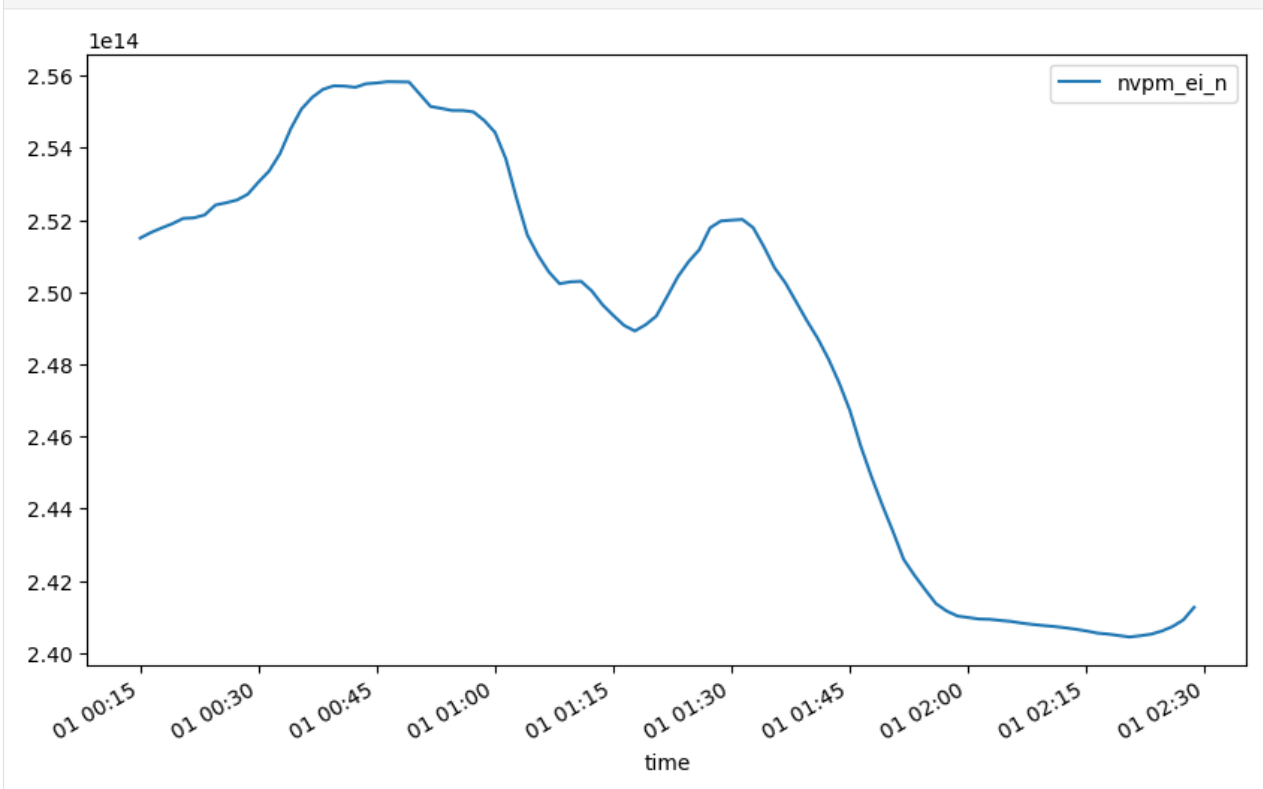

## 6.4.10 Output contrail cirrus optical depth

Note this is only a preliminary implementation and will be changed in the future

The example below uses the contrail cirrus output from 1 flight, but the `df_contrails` input can include contrail cirrus from multiple flights.

To run multiple flights, concatenate `Cocip.contrail` outputs from multiple flights and feed in to `grid_cirrus.<>` methods as `df_contrails`. Unique `flight_id` column will have to be added to the `Cocip.contrail` output before concatenation.

```
[24]: # demo synthetic flight
flight_attrs = {
    "flight_id": "test",
    "true_airspeed": 226.099920796651, # true airspeed, m/s
    "thrust": 0.22, # thrust_setting
    "nvpm_ei_n": 1.897462e15,
    "aircraft_type": "E190",
    "wingspan": 48,
    "n_engine": 2,
}

# Example flight
df = pd.DataFrame()
df["longitude"] = np.linspace(-40, -55, 100)
df["latitude"] = np.linspace(38, 45, 100)
df["altitude"] = np.linspace(10900, 10900, 100)
df["engine_efficiency"] = np.linspace(0.34, 0.35, 100) # ope
df["fuel_flow"] = np.linspace(2.1, 2.4, 100) # kg/s
df["aircraft_mass"] = np.linspace(154445, 154345, 100) # kg
df["time"] = pd.date_range("2022-03-01T00:15:00", "2022-03-01T02:30:00", periods=100)
fl = Flight(data=df, attrs=flight_attrs)
```

```
[25]: # run model
cocip = Cocip(
    met=met,
    rad=rad,
    process_emissions=False,
    humidity_scaling=ConstantHumidityScaling(rhi_adj=0.99),
)
output_flight = cocip.eval(source=fl)
```

```
[26]: # get dataframe of contrail waypoints
df_contrails = cocip.contrail
df_contrails["flight_id"] = cocip.source.attrs["flight_id"]
```

```
[27]: w = df_contrails["longitude"].min()
e = df_contrails["longitude"].max()
s = df_contrails["latitude"].min()
n = df_contrails["latitude"].max()
bbox = (w, s, e, n)

met_bbox = MetDataset(met.data.isel(time=[0])).downselect(bbox)
```

```
[28]: ds_cirrus = natural_cirrus_properties_to_hi_res_grid(met_bbox)
```

```
/Users/marcshapiro/computing/contrailcirrus/pycontrails/pycontrails/core/met.py:755:
↳ UserWarning: Overwriting data in keys `['tau_cirrus']`. Use `.update(...)` to suppress
↳ warning.
warnings.warn(
```

```
[29]: ds_cirrus["cc_natural_cirrus"].data.squeeze().plot(x="longitude", y="latitude");
```

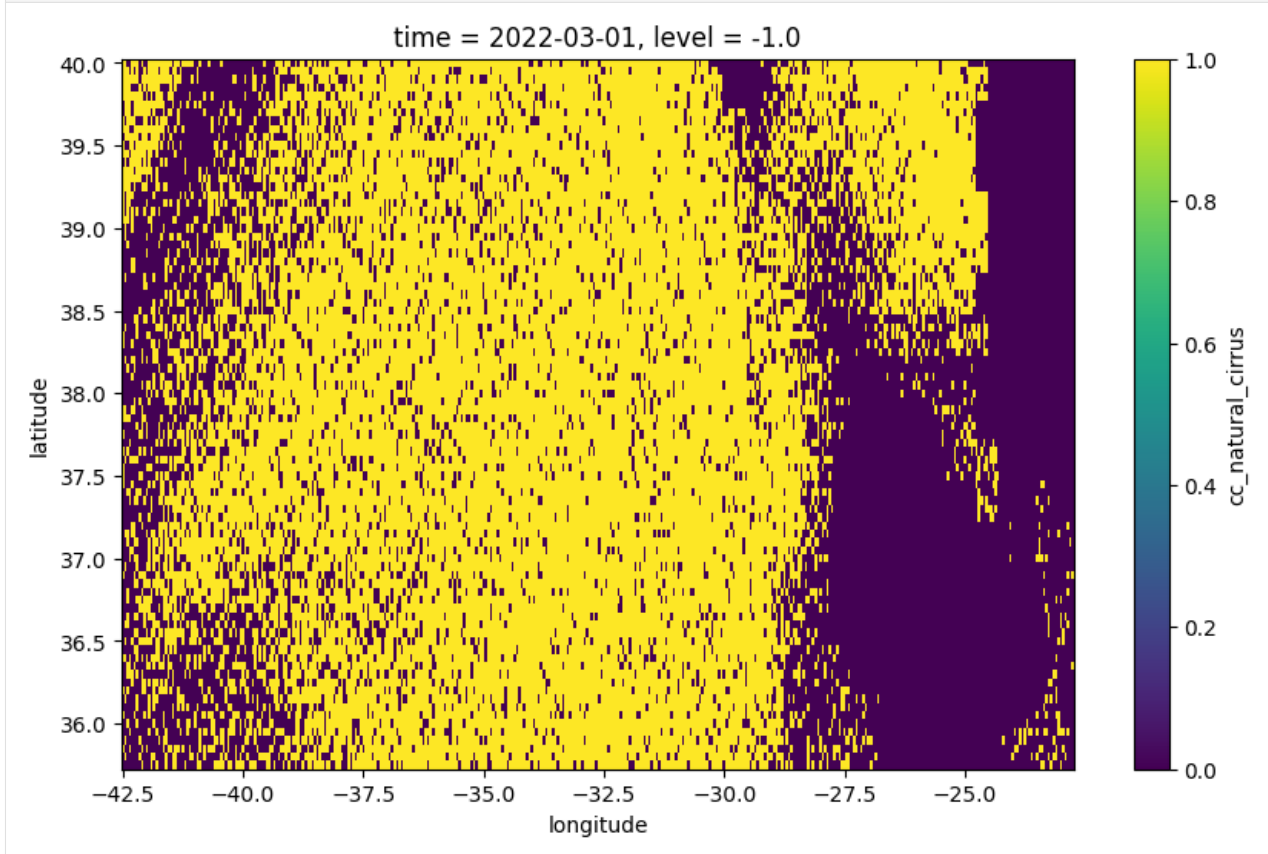

```
[30]: ds_cirrus["tau_cirrus"].data.squeeze().plot(x="longitude", y="latitude");
```

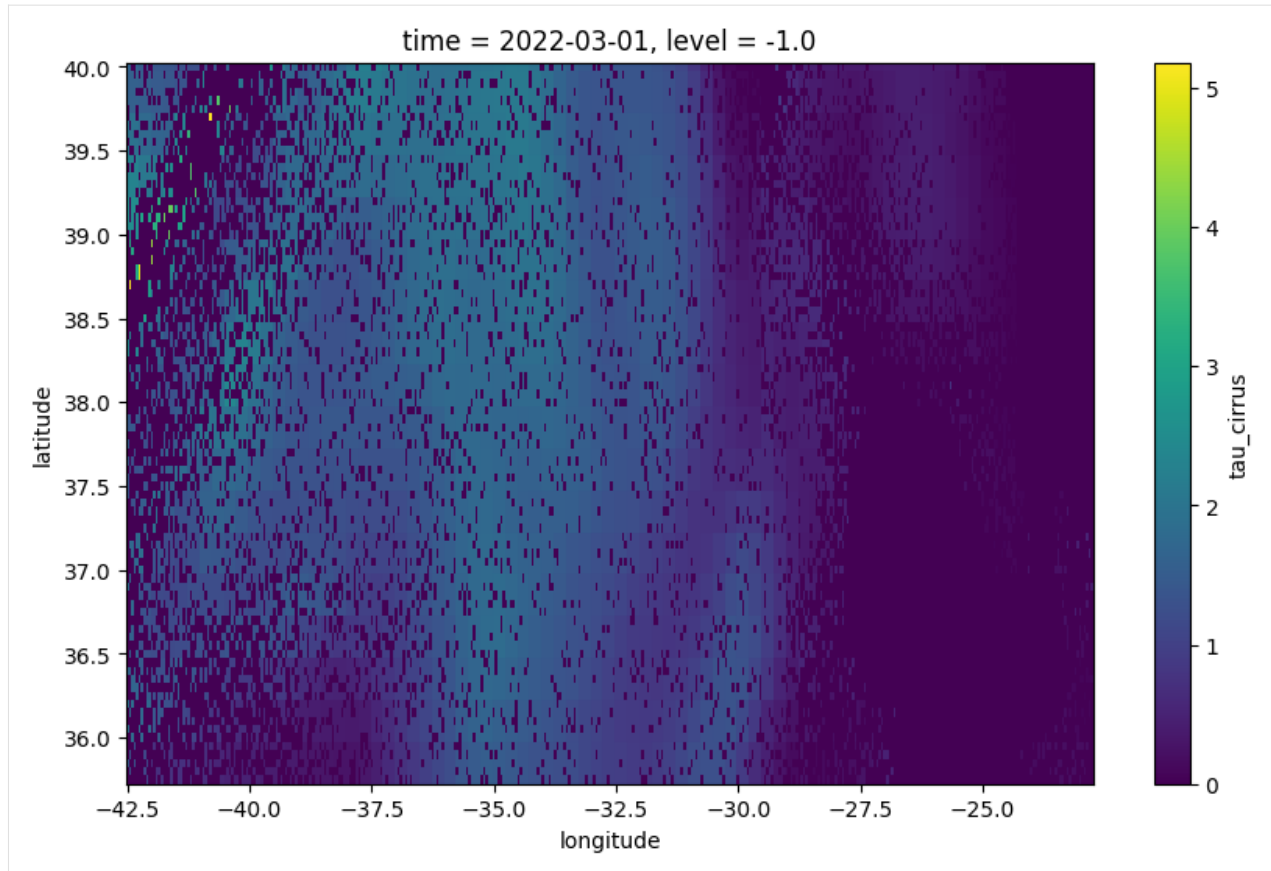

## 6.5 Dry Advection

The Cocip model is designed to simulate the evolution and radiative forcing of a contrail over its lifetime. The model is intricate, relying on a number of meteorological variables and parameters governing the cloud microphysics.

If we are only interested in the evolution of the exhaust plume, we can use the DryAdvection model instead. This model is much simpler, and only requires the initial plume properties and a handful of meteorological variables (wind and temperature). This notebook demonstrates how to use the DryAdvection model and compares the results to the Cocip model.

```
[1]: import pathlib

import matplotlib.pyplot as plt
import pandas as pd

from pycontrails import Flight
from pycontrails.datalib.ecmwf import ERA5
from pycontrails.models.cocip import Cocip
from pycontrails.models.dry_advection import DryAdvection
from pycontrails.models.humidity_scaling import ConstantHumidityScaling
from pycontrails.models.ps_model import PSFlight
from pycontrails.physics import units

plt.rcParams["figure.figsize"] = (10, 6)
```



## 6.5.1 Load data

Following patterns already used in the in the *CoCiP notebook*.

### Meteorological data

```
[2]: time_bounds = ("2022-03-01 00:00:00", "2022-03-01 12:00:00")
     pressure_levels = (300, 250, 200)

     era5pl = ERA5(
         time=time_bounds,
         variables=Cocip.met_variables + Cocip.optional_met_variables,
         pressure_levels=pressure_levels,
     )
     era5sl = ERA5(time=time_bounds, variables=Cocip.rad_variables)

     met = era5pl.open_metdataset()
     rad = era5sl.open_metdataset()
```

## 6.5.2 Example flight

```
[3]: df = pd.read_csv("data/flight.csv")

     # Clip at 33,000 ft to hit more ISSR
     df["altitude"] = df["altitude"].clip(upper=units.ft_to_m(33000))

     # Create a flight instance
     fl = Flight(df, aircraft_type="A320", flight_id="example")
```

## 6.5.3 Run DryAdvection and visualize plume evolution

```
[4]: dt_integration = pd.Timedelta(minutes=2)
     max_age = pd.Timedelta(hours=6)

     params = {
         "dt_integration": dt_integration,
         "max_age": max_age,
         "depth": 50.0, # initial plume depth, [m]
         "width": 40.0, # initial plume width, [m]
     }

     dry_adv = DryAdvection(met, params)
     dry_adv_df = dry_adv.eval(fl).dataframe
```

```
[5]: ax = plt.axes()

     ax.scatter(fl["longitude"], fl["latitude"], s=3, color="red", label="Flight path")
     ax.scatter(
         dry_adv_df["longitude"], dry_adv_df["latitude"], s=0.1, color="purple", label="Plume_
```

(continues on next page)

(continued from previous page)

```

    ↪evolution"
)
ax.legend()
ax.set_title("Flight path and plume evolution under dry advection");

```

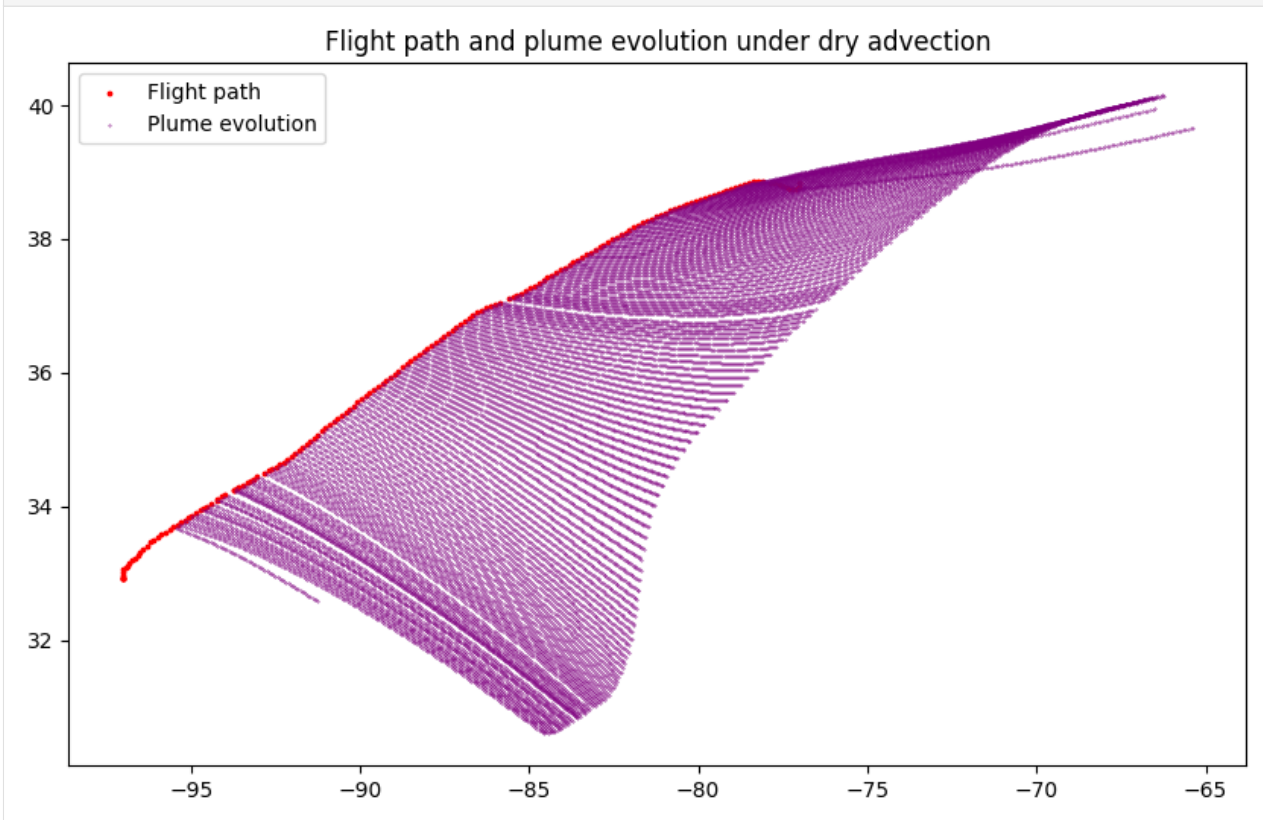

## 6.5.4 Run Cocip and visualize evolution

```

[6]: params = {
      "dt_integration": dt_integration,
      "max_age": max_age,
      "humidity_scaling": ConstantHumidityScaling(rhi_adj=0.9),
      "aircraft_performance": PSFlight(),
    }
cocip = Cocip(met, rad, params)
cocip.eval(fl)
cocip_df = cocip.contrail

```

```

[7]: ax = plt.axes()

ax.scatter(fl["longitude"], fl["latitude"], s=3, color="red", label="Flight path")
ax.scatter(
    cocip_df["longitude"], cocip_df["latitude"], s=0.1, color="orange", label="Plume_
    ↪evolution"
)

```

(continues on next page)

(continued from previous page)

```
ax.legend()
ax.set_title("Flight path and plume evolution under CoCiP");
```

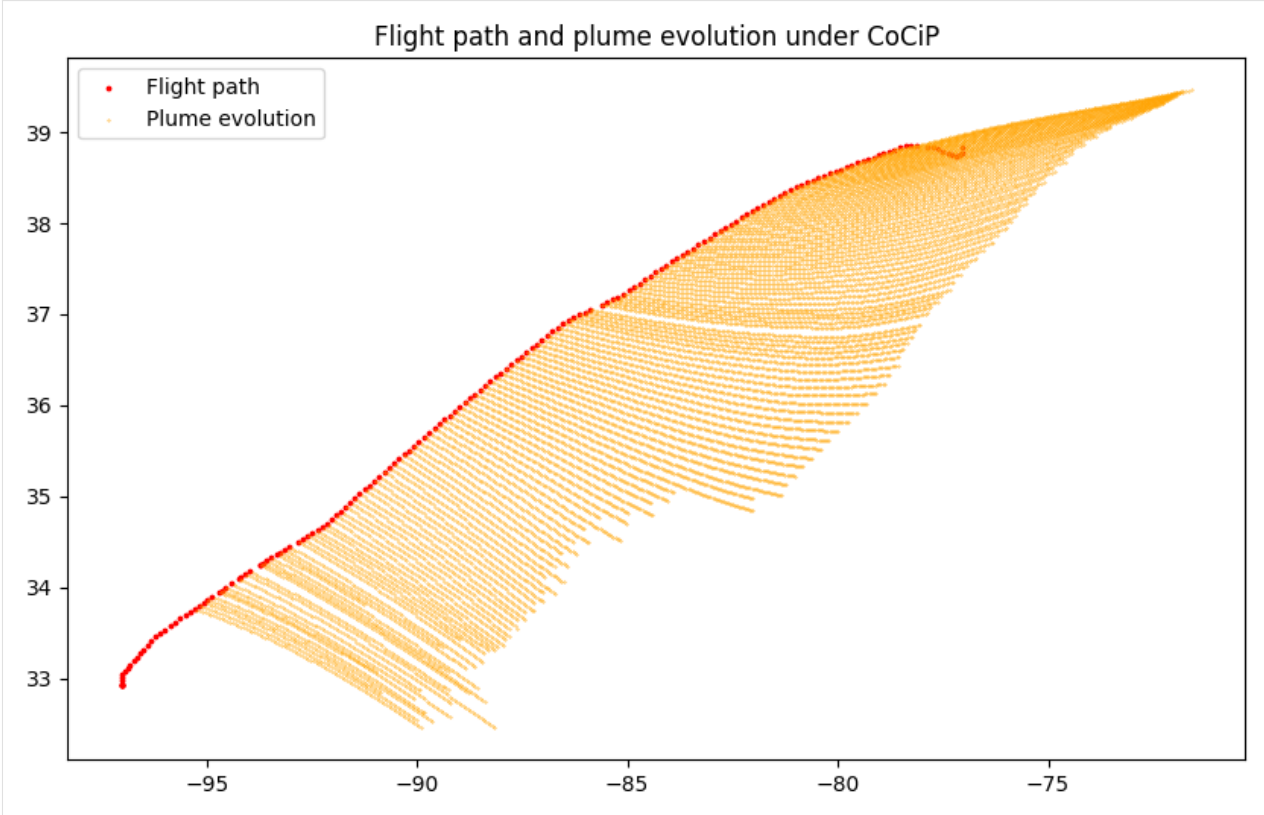

### 6.5.5 Comparison with CoCiP

|                                                            | Dry Advection | CoCiP |
|------------------------------------------------------------|---------------|-------|
| Horizontal advection                                       | Yes           | Yes   |
| Vertical advection                                         | Yes           | Yes   |
| Assumes elliptical plume                                   | Yes           | Yes   |
| Evolves plume geometry (width, depth)                      | Yes           | Yes   |
| Possible to run in pointwise mode (no width nor depth)     | Yes           | No    |
| Considers ice growth and sedimentation                     | No            | Yes   |
| Calculates radiative forcing                               | No            | Yes   |
| Models cloud microphysics                                  | No            | Yes   |
| Calculates end of life condition at each time step         | No            | Yes   |
| Requires aircraft performance model                        | No            | Yes   |
| Allows arbitrary initial ellipse dimensions (width, depth) | Yes           | No    |

## Visualize advected altitude

While the horizontal position of the advected waypoints are relatively similar in both simulations, the altitude of the evolved plume can substantially differ. In CoCiP, the initial contrail is calculated based on an assumed downwash simulation. This typically lowers the contrail depth several hundred meters below the altitude of the flight path. In addition, because CoCiP simulates ice crystal growth and sedimentation, the contrail altitude typically decreases as ice crystals grow and sediment. The dry advection model does not consider sedimentation, and the plume altitude is initially assumed to be the same as the flight altitude. The following figure shows the altitude of the advected waypoints in both simulations.

```
[8]: # Consider a sample waypoint
waypoint = 30
tmp1 = dry_adv_df.query(f"waypoint == {waypoint}")
tmp2 = cocip_df.query(f"waypoint == {waypoint}")

ax = plt.axes()
ax.plot(tmp1["time"], units.pl_to_ft(tmp1["level"]), label="Dry advection")
ax.plot(tmp2["time"], units.pl_to_ft(tmp2["level"]), label="CoCiP advection")
ax.set_xlabel("Time of evolution (s)")
ax.set_ylabel("Altitude (ft)")
ax.set_title(f"Altitude of plume evolution at waypoint {waypoint}")
ax.legend();
```

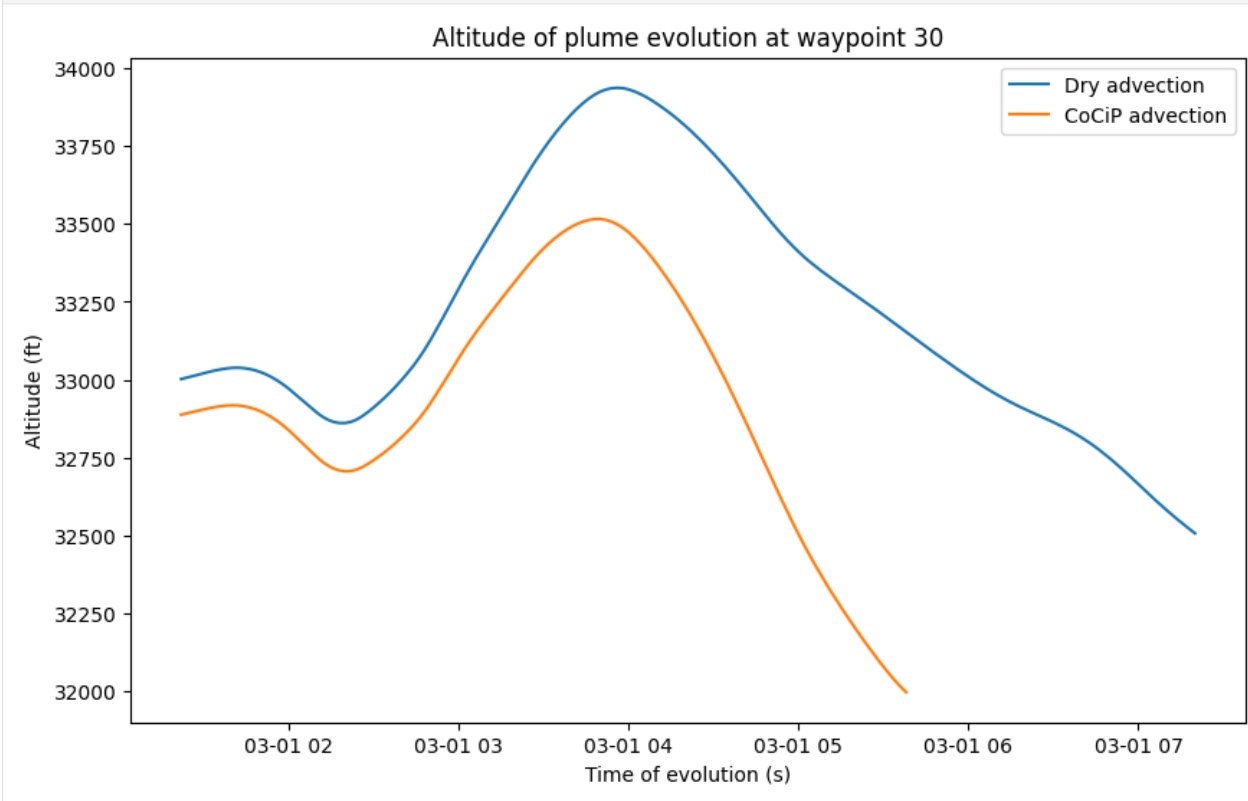

## Visualize advected width

Both CoCiP and dry advection assume the geometry of the plume has an elliptical cross section. The width and depth of this plume evolve according to wind shear effects. Presently, the wind shear enhancement in Cocip is not implemented in DryAdvection. This explains why the Cocip-derived plume is typically wider than the DryAdvection-derived plume.

```
[9]: ax = plt.axes()
ax.plot(tmp1["time"], tmp1["width"], label="Dry advection")
ax.plot(tmp2["time"], tmp2["width"], label="CoCiP advection")
ax.set_xlabel("Time of evolution (s)")
ax.set_ylabel("Width (m)")
ax.set_title(f"Width of plume evolution at waypoint {waypoint}")
ax.legend();
```

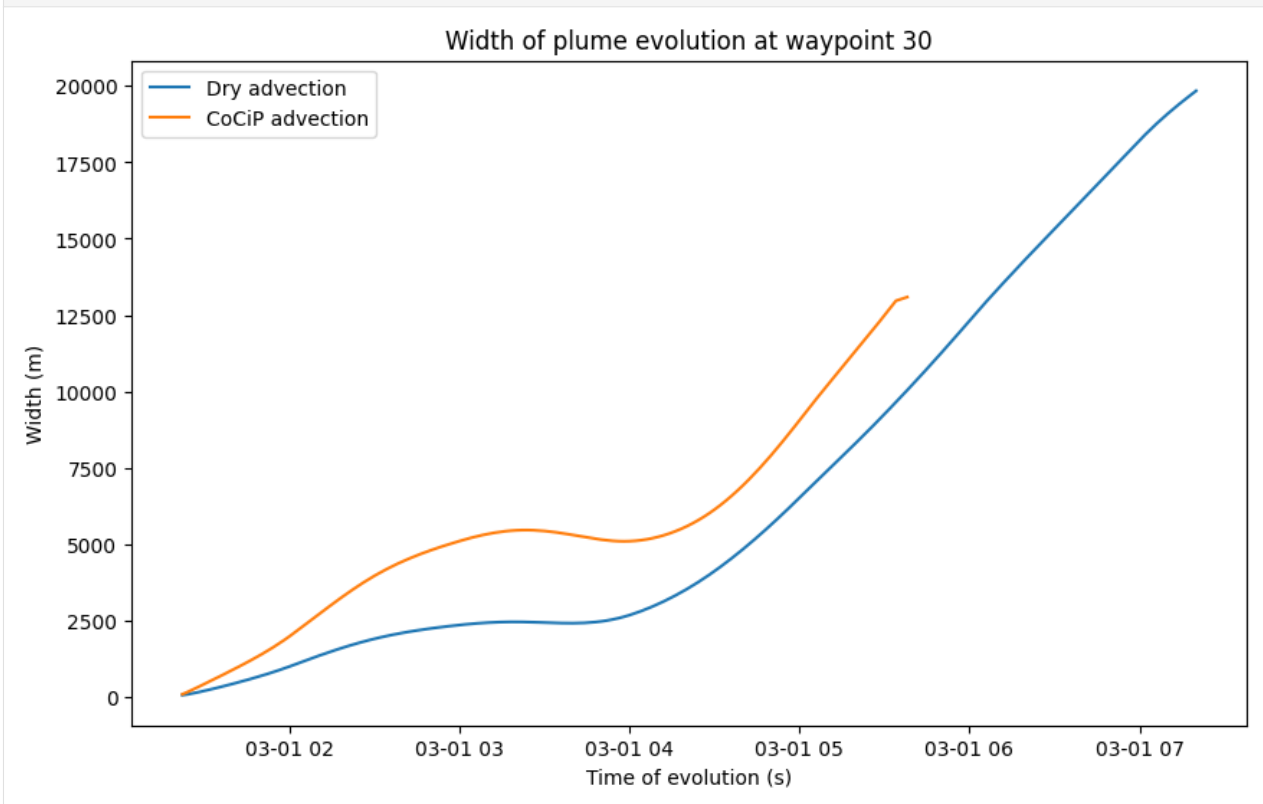

## 6.5.6 Animate the two evolutions

```
[10]: from matplotlib.animation import FuncAnimation, PillowWriter
from IPython.display import Image
```

```
[11]: fig, ax = plt.subplots()
ax.set_xlim(dry_adv_df["longitude"].min() - 2, dry_adv_df["longitude"].max() + 2)
ax.set_ylim(dry_adv_df["latitude"].min() - 2, dry_adv_df["latitude"].max() + 2)

scat1 = ax.scatter([], [], s=2, color="red", label="Flight path")
scat2 = ax.scatter([], [], color="orange", label="CoCiP advection")
```

(continues on next page)

(continued from previous page)

```
scat3 = ax.scatter([], [], color="purple", label="Dry advection")
ax.legend(loc="upper left")

source_frames = fl.dataframe.groupby(fl.dataframe["time"].dt.ceil(dt_integration))
dry_adv_frames = dry_adv_df.groupby(dry_adv_df["time"].dt.ceil(dt_integration))
cocip_frames = cocip_df.groupby(cocip_df["time"].dt.ceil(dt_integration))

times = cocip_frames.indices

def animate(time):
    ax.set_title(time)

    try:
        group = source_frames.get_group(time)
    except KeyError:
        offsets = [[None, None]]
    else:
        offsets = group[["longitude", "latitude"]]
    scat1.set_offsets(offsets)

    group = cocip_frames.get_group(time)
    offsets = group[["longitude", "latitude"]]
    width = 1e-3 * group["width"]
    scat2.set_offsets(offsets)
    scat2.set_sizes(width)

    group = dry_adv_frames.get_group(time)
    offsets = group[["longitude", "latitude"]]
    width = 1e-3 * group["width"]
    scat3.set_offsets(offsets)
    scat3.set_sizes(width)

    return scat1, scat2

plt.close()
ani = FuncAnimation(fig, animate, frames=times)
filename = pathlib.Path("evo.gif")
ani.save(filename, dpi=300, writer=PillowWriter(fps=10))

# Show the gif
display(Image(data=filename.read_bytes(), format="png"))

# Cleanup
filename.unlink()
```



notebooks\_advection\_20\_0.png

## 6.6 ACCF

Interface to the ACCF (algorithmic climate change functions) from the DLR library `climaccf`.

### 6.6.1 References

- Dietmüller, Simone. “Dlr-Pa/Climaccf: Dataset Update for GMDD.” Zenodo, September 13, 2022. <https://doi.org/10.5281/zenodo.7074582>.
- Dietmüller, Simone, Sigrun Matthes, Katrin Dahlmann, Hiroshi Yamashita, Abolfazl Simorgh, Manuel Soler, Florian Linke, et al. “A Python Library for Computing Individual and Merged Non-CO2 Algorithmic Climate Change Functions: CLIMaCCF V1.0.” Preprint. Atmospheric sciences, October 17, 2022. <https://doi.org/10.5194/gmd-2022-203>.

```
[1]: import numpy as np
import pandas as pd
import matplotlib.pyplot as plt

from pycontrails import Flight
from pycontrails.datalib.ecmwf import ERA5
from pycontrails.models.accf import ACCF
from pycontrails.physics import units
```

## 6.6.2 Set Domain

time / altitude

```
[2]: time_bounds = ("2022-01-01 12:00:00", "2022-01-01 15:00:00")
     pressure_levels = [200, 225, 250]
```

## 6.6.3 Download meteorology data from ECMWF

This demo uses ERA5 via the Copernicus Data Store (CDS) for met data. This requires account with Copernicus Data Portal and local `~/.cdsapirc` file with credentials.

```
[3]: # pressure level data
     era5_pl = ERA5(
         time=time_bounds,
         variables=[
             "air_temperature",
             "specific_humidity",
             "potential_vorticity",
             "geopotential",
             "relative_humidity",
             "northward_wind",
             "eastward_wind",
         ],
         pressure_levels=pressure_levels,
     )

     # single level data (radiation)
     era5_sl = ERA5(
         time=time_bounds,
         variables=["surface_solar_downward_radiation", "top_net_thermal_radiation"],
     )

     pl = era5_pl.open_metdataset()
     sl = era5_sl.open_metdataset()
```

## 6.6.4 Create example flight

```
[4]: # Note: ACCF output is in K/kg of fuel so you will need to provide fuel burn of the
     ↪ flight to get impact in K
     n = 10000
     longitude = np.linspace(45, 58, n) + np.linspace(0, 1, n)
     latitude = np.linspace(45, 54, n) - np.linspace(0, 1, n)
     altitude = units.pl_to_m(225) * np.ones(n)

     start = np.datetime64(time_bounds[0])
     end = start + np.timedelta64(90, "m") # 90 minute flight
     time = pd.date_range(start, end, periods=n)
     fl = Flight(
         longitude=longitude,
```

(continues on next page)



(continued from previous page)

```

latitude=latitude,
altitude=altitude,
time=time,
aircraft_type="B737",
flight_id=17,
)
fl["fuel_flow"] = np.linspace(2.1, 2.4, n) # kg/s

```

[5]: fl

```

[5]: Flight [5 keys x 10000 length, 3 attributes]
      Keys: longitude, latitude, time, altitude, fuel_flow
      Attributes:
      time           [2022-01-01 12:00:00, 2022-01-01 13:30:00]
      longitude      [45.0, 59.0]
      latitude       [45.0, 53.0]
      altitude       [11037.0, 11037.0]
      aircraft_type  B737
      flight_id      17
      crs            EPSG:4326

```

## 6.6.5 Initialize ACCF model and evaluate on flight

[7]: ac = ACCF(met=pl, surface=s1)

```

[8]: # Evaluate ACCFs over this flight
      fl = ac.eval(fl)

```

```

selected forecast step: 6.0 HR
UserWarning: For this configuration formation of persistent contrails is possible, if
↳ temperatures are low enough (below 235K) and relative humidity (with respect to ice)
↳ is above or at 90.0%. However keep in mind that the threshold value for the relative
↳ humidity varies with the used forecast model and its resolution. In order to choose
↳ the appropriate threshold value, you should read the details given in Section 5.1 of
↳ the connected publication of Dietmueller et al. 2022

```

## 6.6.6 Explore the output

Raw output:

[9]: fl

```

[9]: Flight [27 keys x 10000 length, 7 attributes]
      Keys: longitude, latitude, time, altitude, fuel_flow, ..., Fin
      Attributes:
      time           [2022-01-01 12:00:00, 2022-01-01 13:30:00]
      longitude      [45.0, 59.0]
      latitude       [45.0, 53.0]

```

(continues on next page)

(continued from previous page)

```
altitude          [11037.0, 11037.0]
aircraft_type     B737
flight_id         17
crs                EPSG:4326
met_source_provider ECMWF
met_source_dataset ERA5
met_source_product reanalysis
pycontrails_version 0.47.3.dev86
```

Now convert fuel flow to total fuel burned by waypoint, and get the impact of each flight waypoint and plot

```
[11]: # Waypoint duration in seconds
dt_sec = fl.segment_duration()

# kg fuel per contrail
fuel_burn = fl["fuel_flow"] * dt_sec

# Get impacts in degrees K per waypoint
warming_contrails = fuel_burn * fl["aCCF_Cont"]
warming_merged = fuel_burn * fl["aCCF_merged"]

[12]: f, (ax0, ax1) = plt.subplots(2, 1, sharex=True, figsize=(12, 8))
ax0.plot(fl["time"], warming_contrails, label="Contrails")
ax0.plot(fl["time"], warming_merged, label="Combined ACCFs")
ax0.set_ylabel("Degrees K")
ax0.set_title("Warming impact by waypoint")
ax0.legend()

ax1.plot(fl["time"], np.cumsum(warming_contrails), label="Contrails")
ax1.plot(fl["time"], np.cumsum(warming_merged), label="Combined ACCFs")
ax1.legend()
ax1.set_xlabel("Waypoint Time")
ax1.set_ylabel("Degrees K")
ax1.set_title("Cumulative warming impact");
```

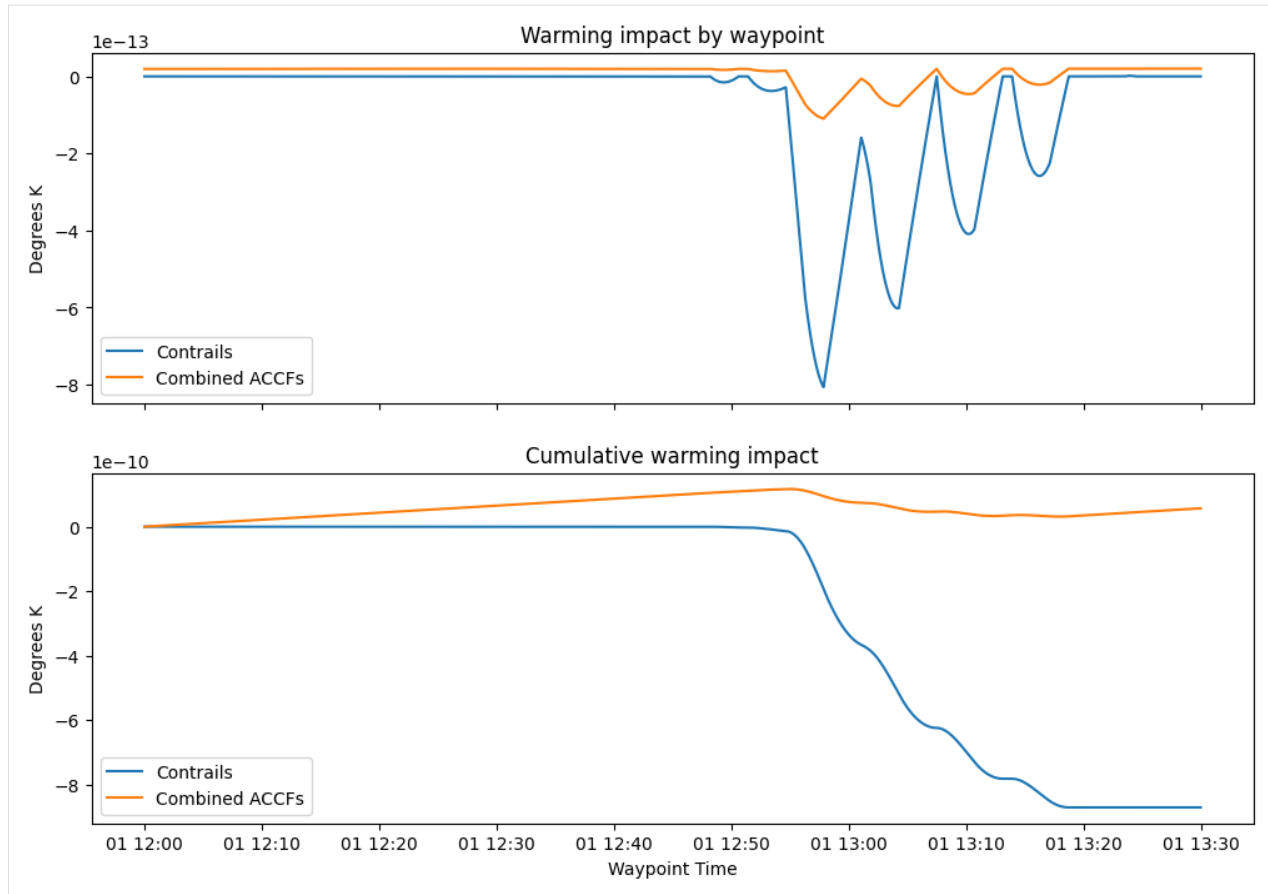

## 6.6.7 Grid ACCF with Parameters

```
[13]: ac = ACCF(pl, sl, {"emission_scenario": "future_scenario", "accf_v": "V1.1"})
      ds = ac.eval() # This will evaluate over the met grid
```

selected forecast step: 6.0 HR

UserWarning: For this configuration formation of persistent contrails is possible, if  
 ↳ temperatures are low enough (below 235K) and relative humidity (with respect to ice)  
 ↳ is above or at 90.0%. However keep in mind that the threshold value for the relative  
 ↳ humidity varies with the used forecast model and its resolution. In order to choose  
 ↳ the appropriate threshold value, you should read the details given in Section 5.1 of  
 ↳ the connected publication of Dietmüller et al. 2022

```
[14]: fig, ax = plt.subplots()
      p = ax.pcolor(
          ds["longitude"].data,
          ds["latitude"].data,
          ds["aCCF_merged"].data[:, :, 0, 0].T,
          cmap="coolwarm",
          vmin=-6e-13,
          vmax=6e-13,
```

(continues on next page)

(continued from previous page)

```
)  
ax.set_xlabel("Longitude")  
ax.set_ylabel("Latitude")  
ax.set_title("Merged ACCF")  
cbar = plt.colorbar(p)  
cbar.set_label("Degrees K/km");
```

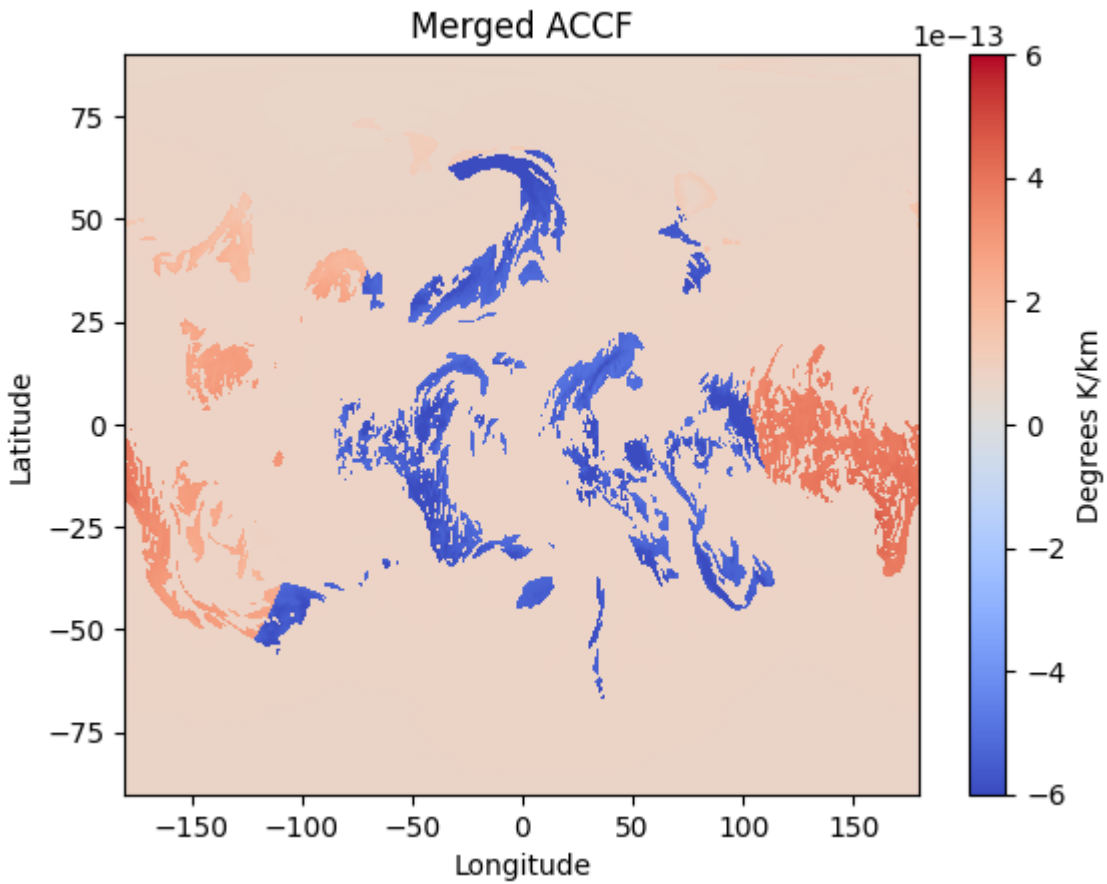

## OBSERVATIONS

See *Running Notebooks* to interact with these notebooks

### 7.1 Load GOES imagery

The ability to load and visualize GOES-16 was added in `pycontrails` 0.47.2. This notebook demonstrates basic usage.

```
[1]: import cartopy.crs as ccrs
import cartopy.feature as cfeature
import matplotlib.pyplot as plt

from pycontrails.datalib import goes
```

#### 7.1.1 Download GOES data

By default, any GOES data will be cached on disk. Set `cachestore=None` to disable caching when defining the GOES object.

We download data for channels 1, 2, and 3. These are needed for creating a true color image.

```
[2]: handler = goes.GOES(region="conus", channels=("C01", "C02", "C03"))

# Download the data
da = handler.get("2023-02-05T18:00:00")
da

[2]: <xarray.DataArray 'CMI' (band_id: 3, y: 3000, x: 5000)>
dask.array<getitem, shape=(3, 3000, 5000), dtype=float32, chunksize=(1, 3000, 5000),
↳ chunktype=numpy.ndarray>
Coordinates:
  t          (band_id) datetime64[ns] 2023-02-05T18:02:35.739931008 ...
  * y        (y) float64 0.1282 0.1282 0.1282 ... 0.04428 0.04425
  * x        (x) float64 -0.1013 -0.1013 -0.1013 ... 0.0386 0.03863
  y_image    float32 0.08624
  x_image    float32 -0.03136
  band_wavelength (band_id) float32 dask.array<chunksize=(1,), meta=np.ndarray>
  * band_id   (band_id) int32 1 2 3
Attributes:
  long_name:          ABI L2+ Cloud and Moisture Imagery reflectanc...
  standard_name:      toa_lambertian_equivalent_albedo_multiplied_b...
```

(continues on next page)

(continued from previous page)

```
sensor_band_bit_depth: 10
valid_range: [ 0 4095]
units: 1
resolution: y: 0.000028 rad x: 0.000028 rad
grid_mapping: goes_imager_projection
cell_methods: t: point area: point
ancillary_variables: DQF
goes_imager_projection: {'long_name': 'GOES-R ABI fixed grid projecti...
geospatial_lat_lon_extent: {'long_name': 'geospatial latitude and longit...
```

## 7.1.2 True color

First we plot a true color image of the CONUS region.

```
[3]: # Extract artifacts for plotting
rgb, src_crs, src_extent = goes.extract_goes_visualization(da, color_scheme="true")
```

### RGB array

The `rgb` array is a 3D array with shape `(3, y, x)`. The first dimension contains the red, green, and blue channels, respectively. The second and third dimensions contain the `y` and `x` coordinates. The plot below shows the earth as seen by the satellite.

```
[4]: fig, ax = plt.subplots(figsize=(10, 10))
ax.imshow(rgb, origin="upper");
```

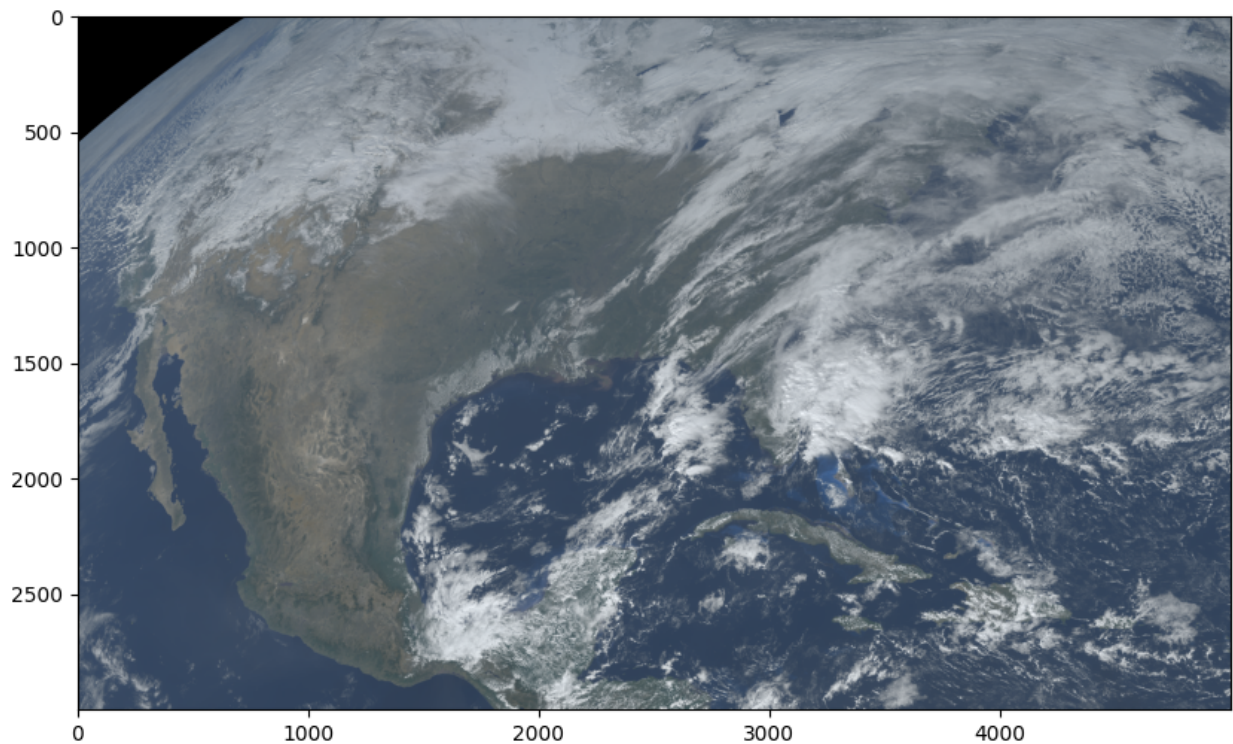

## Projection artifacts

The `src_crs` is a `cartopy.crs.Projection` describing the coordinate reference system of the satellite data. The `src_extent` is a tuple containing the extent of the data in the source coordinate reference system. These can be used to plot the data on a map.

```
[5]: src_crs
```

```
[5]: <Projected CRS: +proj=geos +ellps=WGS84 +lon_0=-75.0 +lat_0=0.0 +h ...>
Name: unknown
Axis Info [cartesian]:
- E[east]: Easting (metre)
- N[north]: Northing (metre)
Area of Use:
- undefined
Coordinate Operation:
- name: unknown
- method: Geostationary Satellite (Sweep X)
Datum: Unknown based on WGS 84 ellipsoid
- Ellipsoid: WGS 84
- Prime Meridian: Greenwich
```

## Visualize

We reproject the image to a Plate Carree projection and add state boundaries and coastlines to the plot.

```
[6]: dst_crs = ccrs.PlateCarree()
```

```
[7]: fig = plt.figure(figsize=(16, 8))
ax = fig.add_subplot(projection=dst_crs, extent=(-125, -55, 12, 50))
ax.coastlines(resolution="50m", color="black", linewidth=0.5)

# add state boundaries to plot
ax.add_feature(cfeature.STATES, edgecolor="black", linewidth=0.5)

ax.imshow(rgb, extent=src_extent, transform=src_crs, origin="upper", interpolation="none
↳")

# Set the x and y ticks to use latitude and longitude labels
gl = ax.gridlines(draw_labels=True, alpha=0.5, linestyle=":")
gl.top_labels = False
gl.right_labels = False
```

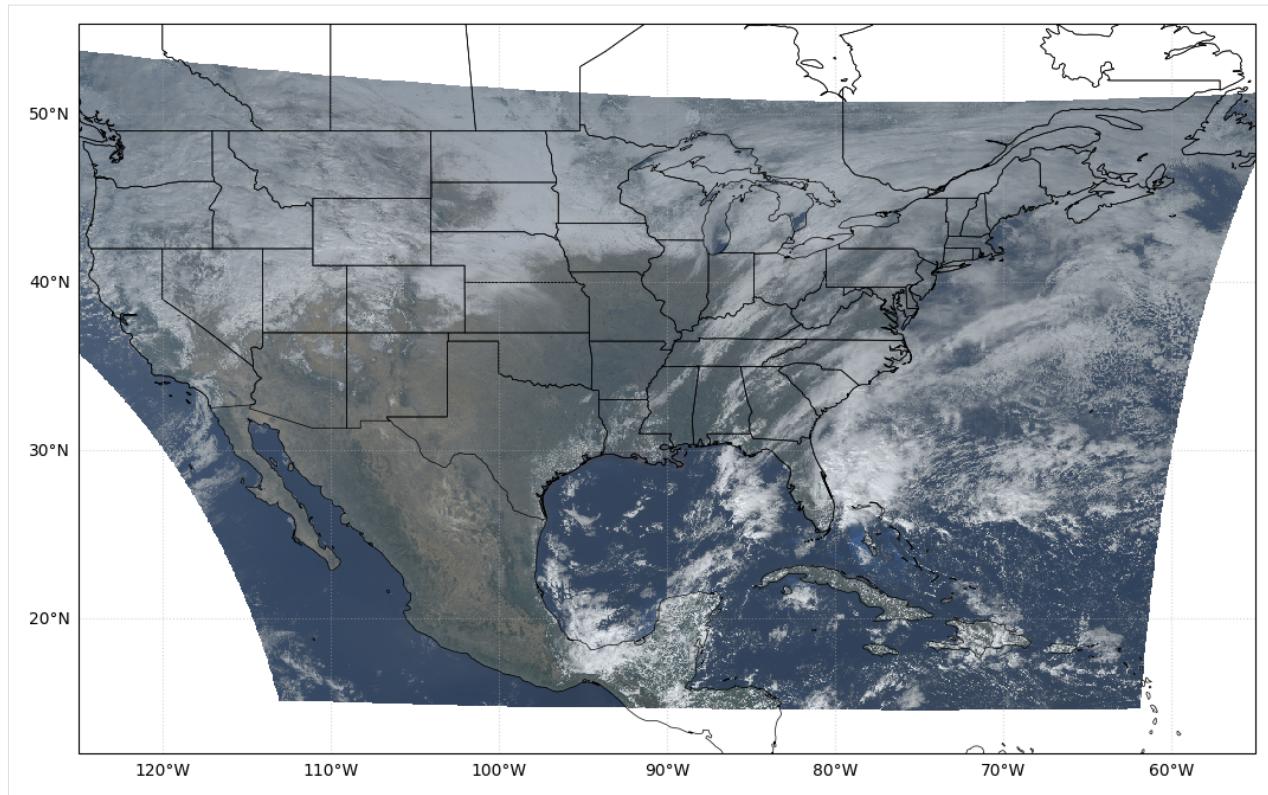

### 7.1.3 Ash color scheme

The ash color scheme was originally developed to visualize volcanic ash. It is also useful for visualizing contrails.

We download data for channels 11, 14, and 15 to create an ash color image.

```
[8]: handler = goes.GOES(region="conus", channels=("C11", "C14", "C15"))

# Download the data
da = handler.get("2023-02-09T18:00:00")

rgb, src_crs, src_extent = goes.extract_goes_visualization(da, color_scheme="ash")

[9]: fig = plt.figure(figsize=(16, 8))
ax = fig.add_subplot(projection=dst_crs, extent=(-125, -55, 12, 50))
ax.coastlines(resolution="50m", color="black", linewidth=0.5)

# add state boundaries to plot
ax.add_feature(cfeature.STATES, edgecolor="black", linewidth=0.5)

ax.imshow(rgb, extent=src_extent, transform=src_crs, origin="upper", interpolation="none")

# Set the x and y ticks to use latitude and longitude labels
gl = ax.gridlines(draw_labels=True, alpha=0.5, linestyle=":")
gl.top_labels = False
gl.right_labels = False
```



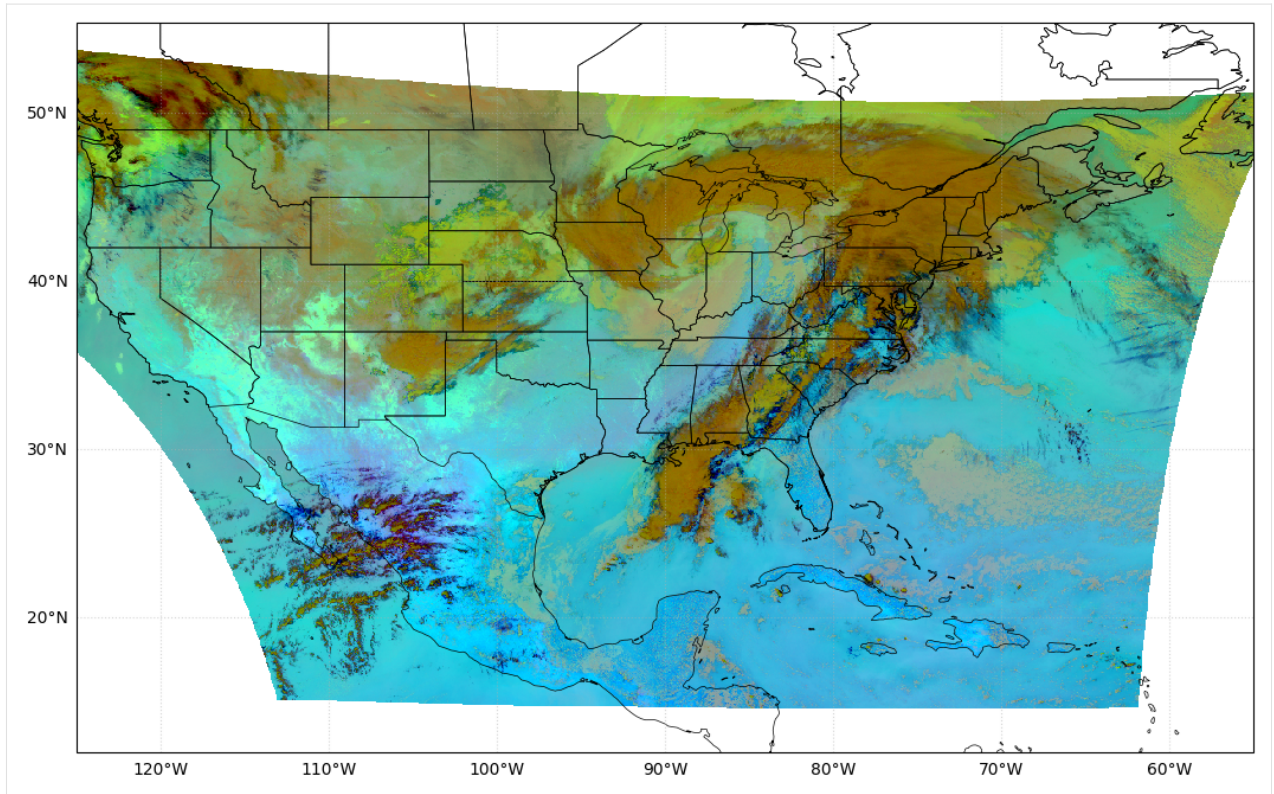



See *Running Notebooks* to interact with these notebooks

## 8.1 Set up a Cache store

The `DiskCacheStore` and `GCPCacheStore` module enables connections to backend storage sources for caching large files.

By default, `pycontrails` uses the `DiskCacheStore` which stores files in the `user cache directory` or the current hard drive.

```
[1]: from pycontrails import DiskCacheStore, GCPCacheStore
```

### 8.1.1 Disk Cache

Store and retrieve files from the local hard drive.

```
[2]: disk = DiskCacheStore()
```

```
[3]: disk.exists("test/cache/path.nc")
```

```
[3]: False
```

```
[4]: # Total cache size, in MB  
disk.size
```

```
[4]: 23709.123237
```

### 8.1.2 GCP Cache

Requires `[gcp]` optional dependencies:

```
$ pip install pycontrails[gcp]
```

Store and retrieve files from `Google Cloud Storage`.

```
[5]: gcp = GCPCacheStore(bucket="contrails-301217-unit-test", cache_dir="test/objects")
```

```
[6]: gcp.bucket
```

```
[6]: 'contrails-301217-unit-test'
```

```
[7]: gcp.path("path.nc")
```

```
[7]: 'test/objects/path.nc'
```

```
[8]: gcp.gs_path("met/ecmwf/some-path.nc")
```

```
[8]: 'gs://contrails-301217-unit-test/test/objects/met/ecmwf/some-path.nc'
```

```
[ ]: gcp.exists("some-path.nc")
```

```
False
```

### Put objects

By default, GCP cache is read only. Pass `read_only=False` to constructor to allow writing

```
[9]: gcp = GPCCacheStore(bucket="contrails-301217-unit-test", cache_dir="test/objects", read_
↳ only=False)
```

```
[ ]: gcp.put("cache.ipynb", "cache.ipynb")
```

```
'cache.ipynb'
```

See *Running Notebooks* to interact with these notebooks

## 9.1 Run CoCiP over a flight

This tutorial walks through an example of running the [Contrail Cirrus Prediction \(CoCiP\)](#) model evaluation along a flight trajectory.

### 9.1.1 References

- Schumann, U. “A Contrail Cirrus Prediction Model.” *Geoscientific Model Development* 5, no. 3 (May 3, 2012): 543–80. <https://doi.org/10.5194/gmd-5-543-2012>.
- Schumann, U., B. Mayer, K. Graf, and H. Mannstein. “A Parametric Radiative Forcing Model for Contrail Cirrus.” *Journal of Applied Meteorology and Climatology* 51, no. 7 (July 2012): 1391–1406. <https://doi.org/10.1175/JAMC-D-11-0242.1>.
- Teoh, Roger, Ulrich Schumann, Arnab Majumdar, and Marc E. J. Stettler. “Mitigating the Climate Forcing of Aircraft Contrails by Small-Scale Diversions and Technology Adoption.” *Environmental Science & Technology* 54, no. 5 (March 3, 2020): 2941–50. <https://doi.org/10.1021/acs.est.9b05608>.
- Teoh, Roger, Ulrich Schumann, Edward Gryspeerdt, Marc Shapiro, Jarlath Molloy, George Koudis, Christiane Voigt, and Marc Stettler. “Aviation Contrail Climate Effects in the North Atlantic from 2016–2021.” *Atmospheric Chemistry and Physics Discussions*, March 30, 2022, 1–27. <https://doi.org/10.5194/acp-2022-169>.

```
[1]: import pandas as pd
import xarray as xr

from pycontrails import Flight
from pycontrails.datalib.ecmwf import ERA5
from pycontrails.models.cocip import Cocip
from pycontrails.models.humidity_scaling import ConstantHumidityScaling
from pycontrails.physics import units
```

## 9.1.2 Load Flight

Load flight trajectory from dataset prepared by Roger Teoh in <https://doi.org/10.5194/acp-2022-169>

```
[2]: # load flight waypoints
df_flight = pd.read_csv("data/flight-cocip.csv")
df_flight.head()
```

|   | Longitude (degrees) | Latitude (degrees) | Altitude (feet) | UTC time \ |
|---|---------------------|--------------------|-----------------|------------|
| 0 | -10.070             | 55.185             | 36000           | 1546651185 |
| 1 | -10.273             | 55.222             | 36000           | 1546651245 |
| 2 | -10.476             | 55.258             | 36000           | 1546651305 |
| 3 | -10.680             | 55.295             | 36000           | 1546651365 |
| 4 | -10.883             | 55.331             | 36000           | 1546651425 |

  

|   | True airspeed (m s <sup>-1</sup> ) | Mach Number | Aircraft mass (kg) \ |
|---|------------------------------------|-------------|----------------------|
| 0 | 230.858                            | 0.791       | 236479.000           |
| 1 | 230.682                            | 0.790       | 236379.755           |
| 2 | 230.563                            | 0.789       | 236280.355           |
| 3 | 230.501                            | 0.789       | 236180.791           |
| 4 | 230.476                            | 0.789       | 236081.128           |

  

|   | Fuel mass flow rate (kg s <sup>-1</sup> ) | Overall propulsion efficiency \ |
|---|-------------------------------------------|---------------------------------|
| 0 | 1.654                                     | 0.4                             |
| 1 | 1.657                                     | 0.4                             |
| 2 | 1.659                                     | 0.4                             |
| 3 | 1.661                                     | 0.4                             |
| 4 | 1.662                                     | 0.4                             |

  

|   | nvPM number emissions index (kg <sup>-1</sup> ) | ICAO Aircraft Type | Wingspan (m) |
|---|-------------------------------------------------|--------------------|--------------|
| 0 | 15000000000000000                               | A359               | 64.75        |
| 1 | 15000000000000000                               | A359               | 64.75        |
| 2 | 15000000000000000                               | A359               | 64.75        |
| 3 | 15000000000000000                               | A359               | 64.75        |
| 4 | 15000000000000000                               | A359               | 64.75        |

```
[3]: # constant properties along the length of the flight
attrs = {
    "flight_id": "fid",
    "aircraft_type": df_flight["ICAO Aircraft Type"].values[0],
    "wingspan": df_flight["Wingspan (m)"].values[0],
}
```

Process the flight into a format expected by pycontrails. See `pycontrails.Flight` for interface details.

```
[4]: # convert UTC timestamp to np.datetime64
df_flight["time"] = pd.to_datetime(df_flight["UTC time"], origin="unix", unit="s")

# set altitude in m
df_flight["altitude"] = units.ft_to_m(df_flight["Altitude (feet)"])

# rename a few columns for compatibility with `Flight` requirements
df_flight = df_flight.rename(
    columns={
```

(continues on next page)

(continued from previous page)

```

        "Longitude (degrees)": "longitude",
        "Latitude (degrees)": "latitude",
        "True airspeed (m s-1)": "true_airspeed",
        "Mach Number": "mach_number",
        "Aircraft mass (kg)": "aircraft_mass",
        "Fuel mass flow rate (kg s-1)": "fuel_flow",
        "Overall propulsion efficiency": "engine_efficiency",
        "nvPM number emissions index (kg-1)": "nvpm_ei_n",
    }
)

# clean up a few columns before building Flight class
df_flight = df_flight.drop(
    columns=["ICAO Aircraft Type", "Wingspan (m)", "UTC time", "Altitude (feet)"]
)

fl = Flight(data=df_flight, attrs=attrs)
fl

```

```

[4]: Flight [10 keys x 162 length, 4 attributes]
      Keys: longitude, latitude, true_airspeed, mach_number, aircraft_mass, ..., time
      Attributes:
      time           [2019-01-05 01:19:45, 2019-01-05 04:00:21]
      longitude      [-50.0, -10.07]
      latitude       [55.185, 61.089]
      altitude       [10972.8, 10972.8]
      flight_id      fid
      aircraft_type  A359
      wingspan       64.75
      crs            EPSG:4326

```

### 9.1.3 Load meteorology from ECMWF

```

[5]: # get met domain from Flight
time = (
    pd.to_datetime(fl["time"][0]).floor("H"),
    pd.to_datetime(fl["time"][-1]).ceil("H") + pd.Timedelta("10H"),
)

# select pressure levels
pressure_levels = [
    400,
    350,
    300,
    250,
    225,
    200,
    175,
    150,
]

```

```
[6]: # downloads met data from CDS
era5pl = ERA5(time=time, variables=Cocip.met_variables, pressure_levels=pressure_levels)
era5sl = ERA5(
    time=time,
    variables=Cocip.rad_variables,
)
```

```
[7]: # create `MetDataset` from sources
met = era5pl.open_metdataset()
rad = era5sl.open_metdataset()
```

### 9.1.4 Set up model

```
[8]: params = {
    "process_emissions": False,
    "verbose_outputs": True,
    "humidity_scaling": ConstantHumidityScaling(rhi_adj=0.98),
}
cocip = Cocip(met=met, rad=rad, params=params)
```

### 9.1.5 Run model

```
[9]: fl_out = cocip.eval(source=fl)

/Users/marcshapiro/computing/contrailcirrus/pycontrails/pycontrails/models/cocip/cocip.
↳py:2189: UserWarning: At time 2019-01-05T15:30:00.000000, the contrail has no
↳intersection with the met data. This is likely due to the contrail being advected
↳outside the met domain.
warnings.warn(
```

### 9.1.6 Review output

The output flight has the original flight data with many new variables added from the evaluation.

```
[10]: fl_out
[10]: Flight [66 keys x 162 length, 9 attributes]
      Keys: waypoint, longitude, latitude, true_airspeed, mach_number, ..., cocip
      Attributes:
      time           [2019-01-05 01:19:45, 2019-01-05 04:00:21]
      longitude      [-50.0, -10.07]
      latitude       [55.185, 61.089]
      altitude       [10972.8, 10972.8]
      flight_id      fid
      aircraft_type  A359
      wingspan       64.75
      crs            EPSG:4326
      rhi_adj        0.98
      humidity_scaling_nameconstant_scale
```

(continues on next page)





(continued from previous page)

```

4          33          fid 2019-01-05 01:52:44 2019-01-05 02:00:00
...          ...          ...          ...          ...
0          55          fid 2019-01-05 02:14:48 2019-01-05 13:00:00
0          55          fid 2019-01-05 02:14:48 2019-01-05 13:30:00
0          55          fid 2019-01-05 02:14:48 2019-01-05 14:00:00
0          55          fid 2019-01-05 02:14:48 2019-01-05 14:30:00
0          55          fid 2019-01-05 02:14:48 2019-01-05 15:00:00

          age longitude latitude altitude level \
index
0  0 days 00:11:16 -16.010456 56.334371 10929.200527 228.855145
1  0 days 00:10:16 -16.243723 56.380602 10926.894766 228.938191
2  0 days 00:09:16 -16.478084 56.425542 10924.667135 229.018447
3  0 days 00:08:16 -16.714148 56.469048 10922.745458 229.087698
4  0 days 00:07:16 -16.951516 56.510025 10921.141514 229.145512
...          ...          ...          ...          ...
0  0 days 00:00:00 -9.957466 74.162396 10938.604760 228.516685
0  0 days 00:00:00 -7.452062 74.581339 10914.404661 229.388471
0  0 days 00:00:00 -4.724895 74.903333 10874.310228 230.838762
0  0 days 00:00:00 -1.807077 75.115034 10854.571581 231.555468
0  0 days 00:00:00 1.202617 75.218719 10856.300880 231.492606

          continuous ... dn_dt_agg dn_dt_turb rf_sw rf_lw rf_net \
index          ...
0          True ... 1.567664e-20 0.000025 0.0 0.092565 0.092565
1          True ... 3.985451e-19 0.000027 0.0 1.043019 1.043019
2          True ... 6.609394e-19 0.000029 0.0 1.955334 1.955334
3          True ... 8.881788e-19 0.000030 0.0 2.946739 2.946739
4          True ... 9.416210e-19 0.000031 0.0 3.009561 3.009561
...          ... ...          ...          ...          ...
0          False ... 1.933380e-18 0.000002 0.0 3.184593 3.184593
0          False ... 1.674621e-18 0.000001 0.0 3.146509 3.146509
0          False ... 1.218293e-18 0.000001 0.0 2.435764 2.435764
0          False ... 1.016172e-18 0.000001 0.0 2.323749 2.323749
0          False ... 1.791175e-18 0.000001 0.0 NaN NaN

          persistent ef timestep age_hours dt_integration
index
0          True 2.118821e+09 0 0.187778 0 days 00:11:16
1          True 5.918572e+09 0 0.171111 0 days 00:10:16
2          True 8.176894e+09 0 0.154444 0 days 00:09:16
3          True 9.090643e+09 0 0.137778 0 days 00:08:16
4          True 6.849343e+09 0 0.121111 0 days 00:07:16
...          ...          ...          ...          ...
0          True 0.000000e+00 22 0.000000 0 days 00:30:00
0          True 0.000000e+00 23 0.000000 0 days 00:30:00
0          True 0.000000e+00 24 0.000000 0 days 00:30:00
0          True 0.000000e+00 25 0.000000 0 days 00:30:00
0          True 0.000000e+00 26 0.000000 0 days 00:30:00

[230 rows x 57 columns]

```

We can visualize the contrail on top of the original flight trajectory using pandas plotting capabilities

```
[14]: ax = cocip.source.dataframe.plot(
        "longitude", "latitude", color="k", label=fl.attrs["flight_id"], figsize=(12, 8)
    )
    cocip.contrail.plot.scatter("longitude", "latitude", c="rf_lw", cmap="Reds", ax=ax);
```

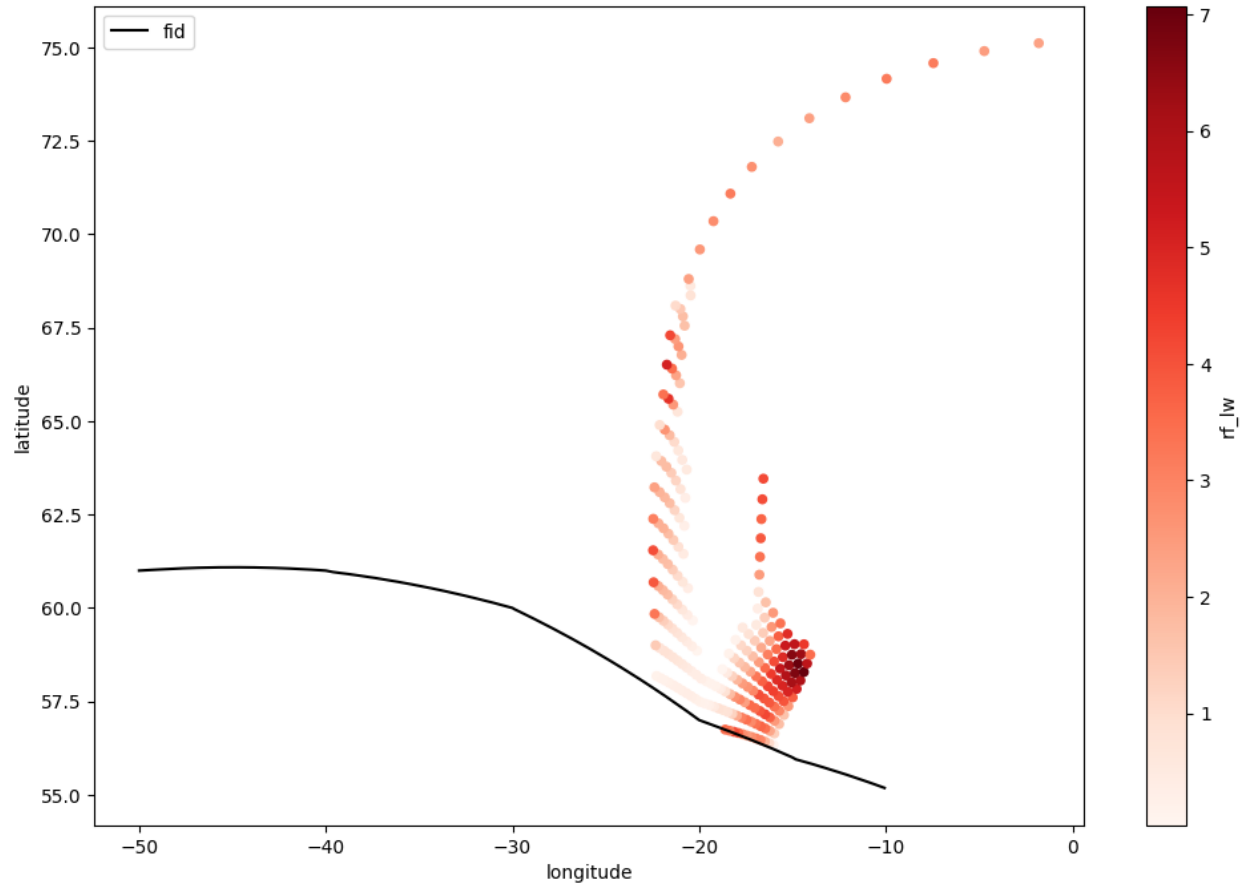

```
[15]: ax = cocip.source.dataframe.plot(
        "longitude", "latitude", color="k", label=fl.attrs["flight_id"], figsize=(12, 8)
    )
    cocip.contrail.plot.scatter(
        "longitude", "latitude", c="ef", cmap="coolwarm", vmin=-1e12, vmax=1e12, ax=ax
    );
```

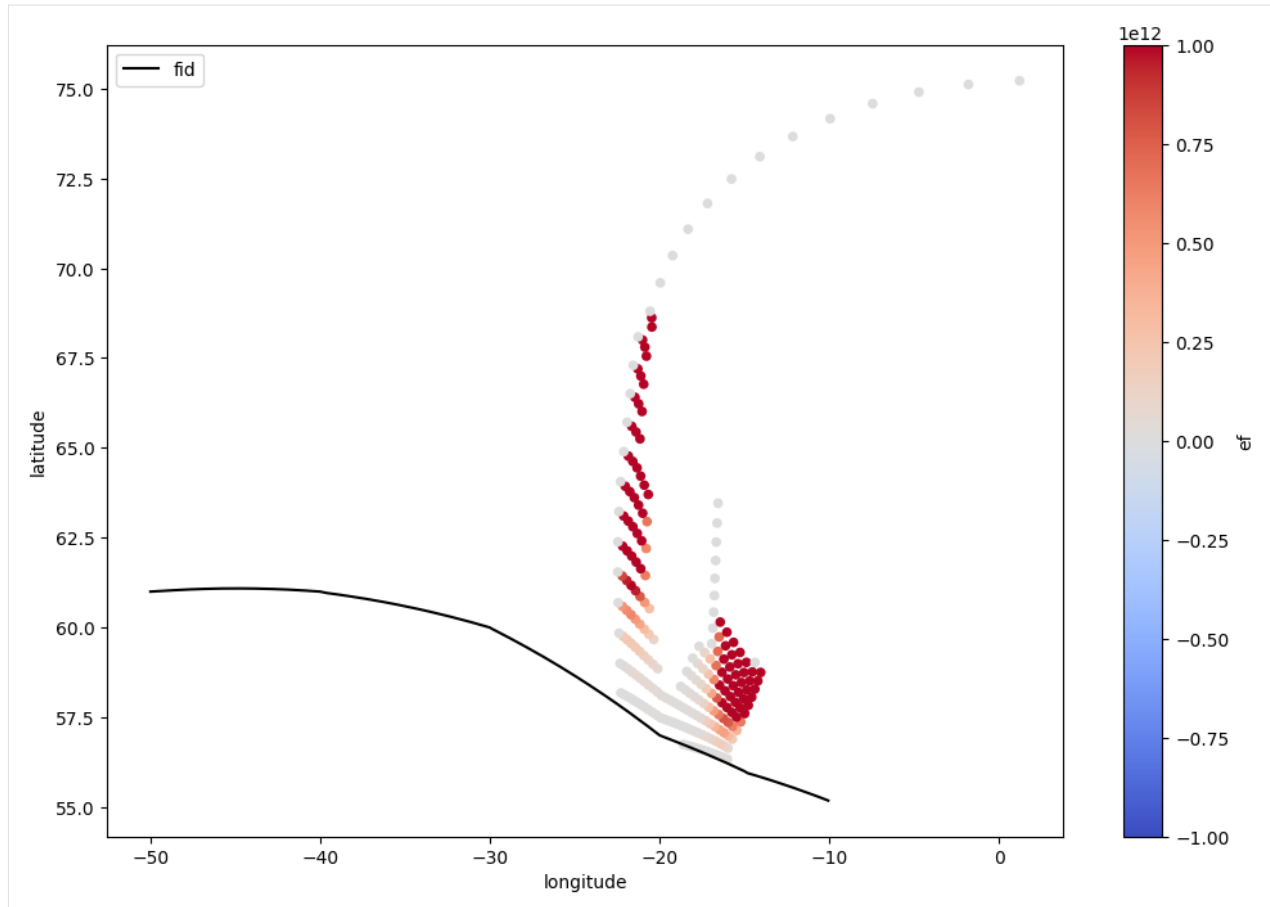

## 9.2 Run CoCiP with FDR or QAR data

### 9.2.1 References

- Schumann, U. “A Contrail Cirrus Prediction Model.” *Geoscientific Model Development* 5, no. 3 (May 3, 2012): 543–80. <https://doi.org/10.5194/gmd-5-543-2012>.
- EASA: ICAO Aircraft Engine Emissions Databank (07/2021), 2021.
- ICAO: Annex 16: Environmental Protection - Volume II - Aircraft Engine Emissions: <https://store.icao.int/en/annex-16-environmental-protection-volume-ii-aircraft-engine-emissions>, 2008. Last access: 18 August 2022.

```
[1]: import numpy as np
import xarray as xr
import pandas as pd
from matplotlib import pyplot as plt
import scipy

from pycontrails import Flight
from pycontrails.datalib.ecmwf import ERA5
from pycontrails.models.cocip import Cocip
from pycontrails.models.humidity_scaling import HistogramMatching
```

(continues on next page)

(continued from previous page)

```
from pycontrails.models.ps_model import PSFlight
from pycontrails.models.emissions import Emissions
```

## 9.2.2 Download met data

```
[2]: time_bounds = ("2022-03-01 00:00:00", "2022-03-01 23:00:00")
pressure_levels = (300, 250, 200) # 30,000 ft to 38,000 ft

era5pl = ERA5(
    time=time_bounds,
    variables=Cocip.met_variables + Cocip.optional_met_variables,
    pressure_levels=pressure_levels,
)
era5sl = ERA5(time=time_bounds, variables=Cocip.rad_variables)

# download data from ERA5 (or open from cache)
met = era5pl.open_metdataset()
rad = era5sl.open_metdataset()
```

## 9.2.3 Read in data and resample

In this example, the sample data provides TAS, aircraft mass, and fuel flow per engine. Any values provided as input to the CoCiP model will not be overwritten when CoCiP is run, and so we should make sure we are saving the most accurate portions of the FDR data. Typically, thrust values provided by FDRs are noisy and innaccurate and so it is recommended to drop the thrust value if provided and recompute thrust through an aircraft performance model (below).

In this case, fuel flow is provided per engine, and so total fuel flow must be computed by summing the two values together.

Here we are also resampling the FDR data to a one minute sampling period, which is recommended when running CoCiP. Note that the `resample_and_fill` function will interpolate time, position, and altitude, but for the remaining columns, it will simply choose the nearest value. There are much more accurate ways to resample fuel flow data, but this should generally be sufficient to estimate contrail impacts.

```
[3]: attrs = {
    "flight_id": "test",
    "aircraft_type": "B77W",
    "engine_uid": "01P21GE217", # 01P21GE217 -> GE90-115B
    # "n_engine": 2 # This shouldn't be needed?
}

df = pd.read_csv("data/flight-fdr.csv")
df["fuel_flow"] = df["fuel_flow_1"] + df["fuel_flow_2"] # Checked
fl = Flight(df, attrs=attrs)

fl = fl.resample_and_fill(freq="60s", drop=False)
fl

[3]: Flight [10 keys x 136 length, 4 attributes]
      Keys: longitude, latitude, altitude, flight_id, true_airspeed, ..., time
      Attributes:
```

(continues on next page)

(continued from previous page)

```
time          [2022-03-01 00:15:00, 2022-03-01 02:30:00]
longitude     [-39.926, -25.0]
latitude      [34.0, 39.97]
altitude      [10900.0, 10900.0]
flight_id     test
aircraft_type B77W
engine_uid    01P21GE217
crs           EPSG:4326
```

## 9.2.4 (Optional) Run Aircraft Performance Model

The CoCiP module will automatically run an aircraft performance model to compute any missing values needed. In this case, we still need to compute engine efficiency and estimated thrust force. For completeness, we show how this can be computed directly from the an aircraft performance model.

```
[4]: perf = PSFlight(met=met)
     fp = perf.eval(fl)
```

```
[5]: fig, ax = plt.subplots()
     ax2 = ax.twinx()
     ax3 = ax2.twinx()
     ax2.set_yticks([])
     fp.dataframe.plot(ax=ax, x="time", y="engine_efficiency", style="r", legend=False)
     fp.dataframe.plot(ax=ax2, x="time", y="thrust", style="b", legend=False)
     fp.dataframe.plot(ax=ax3, x="time", y="fuel_flow", style="k", legend=False)
     _ = ax3.legend(
         [ax.get_lines()[0], ax2.get_lines()[0], ax3.get_lines()[0]],
         ["Engine Efficiency", "Thrust", "Fuel Flow"],
         bbox_to_anchor=(1.15, 0.5),
     )
```

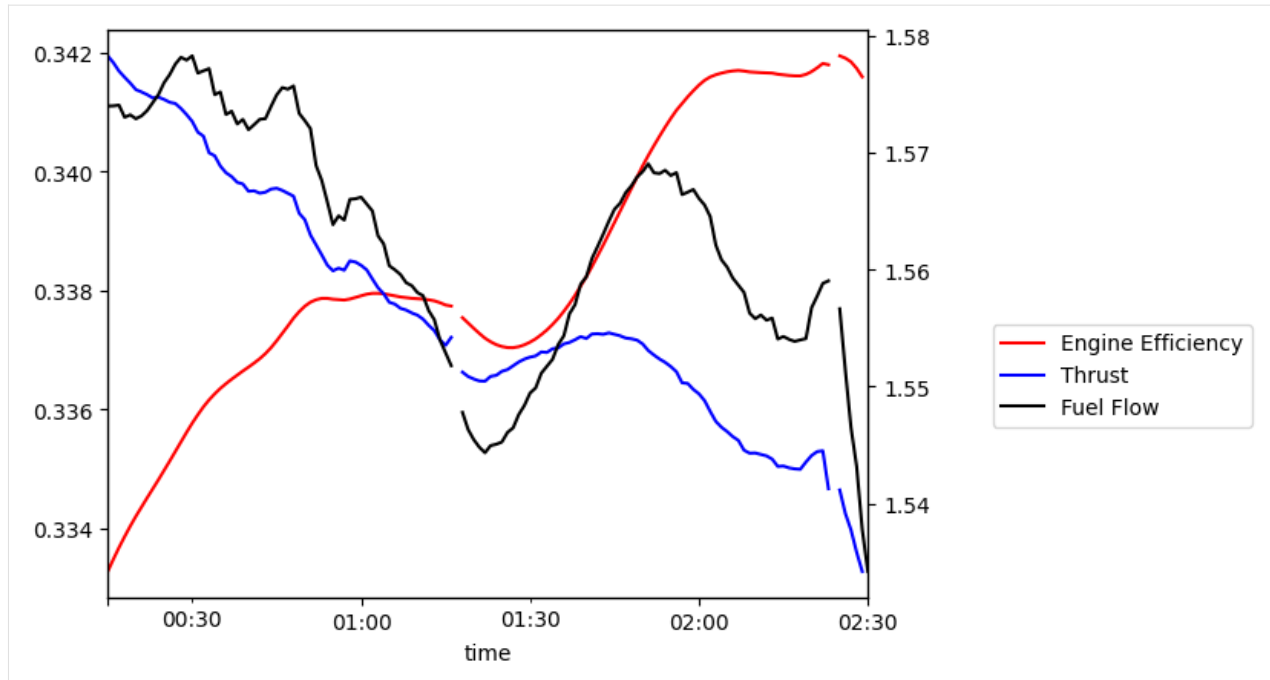

## 9.2.5 Compute Aircraft Emissions

Given fuel flow data, met data, aircraft, and engine type, we have sufficient information to run the emissions module and compute nvPM estimates needed as input for CoCiP. We have not specified engine type, so in the case, the default engine type will be assumed, which for the B77W is the GE-90 115B. To specify a different engine type, add the key `engine_uid` to the `attrs` dict when creating the `Flight` object.

Note that the emissions module estimates the aircraft thrust setting by comparing the fuel flow to the maximum fuel flow. This is the preferred way to estimate emissions using the ICAO emissions inventory and is the default behavior of the emissions module even when aircraft thrust is provided in the input.

```
[6]: emissions = Emissions(met=met, humidity_scaling=HistogramMatching())
fl = emissions.eval(fl)
fl
```

```
[6]: Flight [31 keys x 136 length, 17 attributes]
      Keys: longitude, latitude, altitude, flight_id, true_airspeed, ..., nvpm_number
      Attributes:
      time                [2022-03-01 00:15:00, 2022-03-01 02:30:00]
      longitude           [-39.926, -25.0]
      latitude            [34.0, 39.97]
      altitude            [10900.0, 10900.0]
      flight_id           test
      aircraft_type       B77W
      engine_uid          01P21GE217
      crs                 EPSG:4326
      n_engine            2
      gaseous_data_source FFM2
      nvpm_data_source    ICAO EDB
      total_co2           39390.76441156896
      total_h2o           15337.3346711712
```

(continues on next page)

(continued from previous page)

```
total_so2      14.963253337727998
total_sulphates 0.30537251709648977
total_oc       0.2493875556288
total_nox      192.979281298076
total_co       2.915210297723201
total_hc       0.6230983842461807
total_nvpm_mass 0.18164446517898938
total_nvpm_number 3.54753797881968e+18
```

```
[7]: fig, ax = plt.subplots()
      ax2 = ax.twinx()
      fl_dataframe.plot(ax=ax, x="time", y="nvpm_mass", style="r", legend=False)
      fl_dataframe.plot(ax=ax2, x="time", y="fuel_flow", style="b", legend=False)
      ax2.legend(
          [
              ax.get_lines()[0],
              ax2.get_lines()[0],
          ],
          ["nvPM Mass", "Fuel Flow"],
          bbox_to_anchor=(1.15, 0.5),
      )
```

```
[7]: <matplotlib.legend.Legend at 0x176d15010>
```

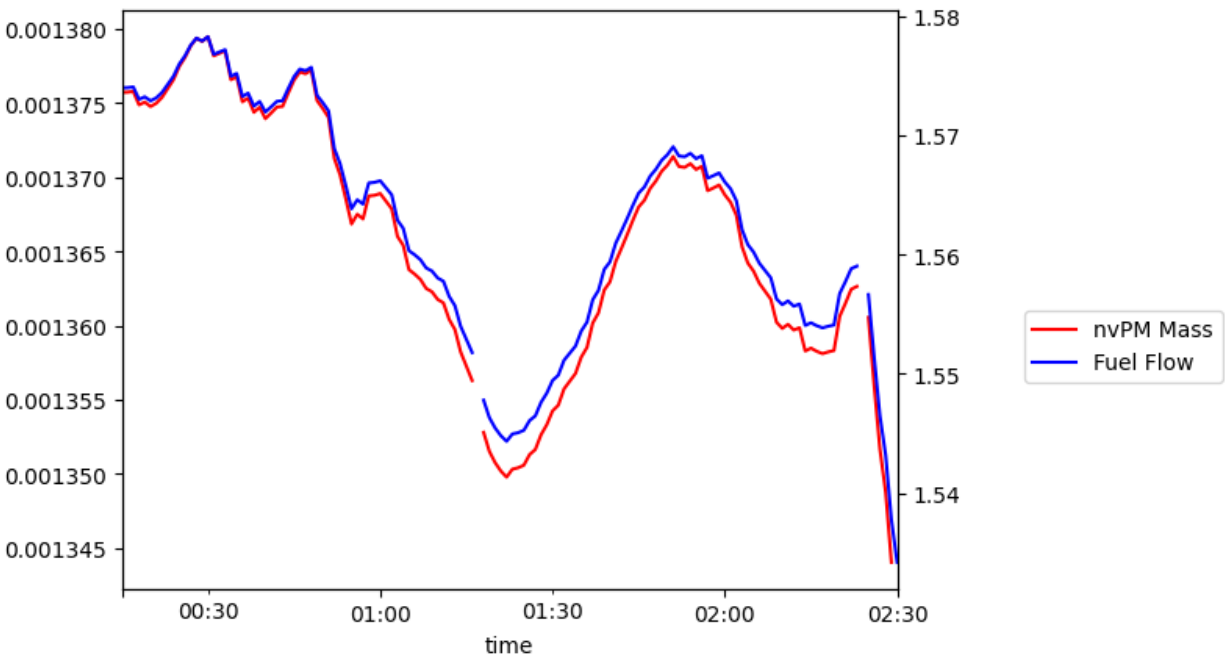



## 9.2.6 Run CoCiP over the flight

In order to predict contrail impact, we still need an estimate of engine efficiency, which is needed to determine if the Schmidt-Appleman Criteria is satisfied. If we provide the CoCiP module with an aircraft performance model, in this case the Poll-Schumann model, then this value will be estimated for us.

In the code below, the CoCiP module will run the Poll-Schumann model over the flight using the provided aircraft mass in order to estimate the thrust force required for the plane to fly the specified trajectory. This value will then be used along with the provided fuel flow data to estimate engine efficiency. Fuel flow and emissions numbers will not be recomputed here, and the warning from `aircraft_performance.py` can be ignored — three iterations of the performance model are only needed to estimate aircraft mass, which in this case is taken from the FDR data.

```
[8]: cocip = Cocip(
      met=met, rad=rad, aircraft_performance=PSFlight(), humidity_
      ↪scaling=HistogramMatching()
    )
    fl = cocip.eval(fl)
    fl
```

```
[8]: Flight [67 keys x 136 length, 25 attributes]
      Keys: waypoint, longitude, latitude, altitude, flight_id, ..., cocip
      Attributes:
      time                [2022-03-01 00:15:00, 2022-03-01 02:30:00]
      longitude           [-39.926, -25.0]
      latitude            [34.0, 39.97]
      altitude            [10900.0, 10900.0]
      flight_id           test
      aircraft_type       B77W
      engine_uid          01P21GE217
      crs                  EPSG:4326
      n_engine            2
      gaseous_data_source FFM2
      nvpm_data_source    ICAO EDB
      total_co2           39390.76441156896
      total_h2o           15337.3346711712
      total_so2           14.963253337727998
      total_sulphates     0.30537251709648977
      total_oc            0.2493875556288
      total_nox           192.979281298076
      total_co            2.915210297723201
      total_hc            0.6230983842461807
      total_nvpm_mass     0.18164446517898938
      total_nvpm_number   3.54753797881968e+18
      aircraft_performance_modelPSFlight
      wingspan            64.8
      max_mach            0.89
      max_altitude        13136.8800000000001
      total_fuel_burn     12469.37778144
      humidity_scaling_namehistogram_matching
      humidity_scaling_formulaera5_quantiles -> iagos_quantiles
      pycontrails_version 0.49.3.dev50
```

## 9.2.7 Visualize Contrail Impact

First, we plot cumulative EF by flight waypoint (one minute sample period)

```
[9]: fl.dataframe.plot.scatter(
    x="longitude",
    y="latitude",
    c="ef",
    cmap="coolwarm",
    vmin=-1e13,
    vmax=1e13,
    title="EF generated by flight waypoint",
);
```

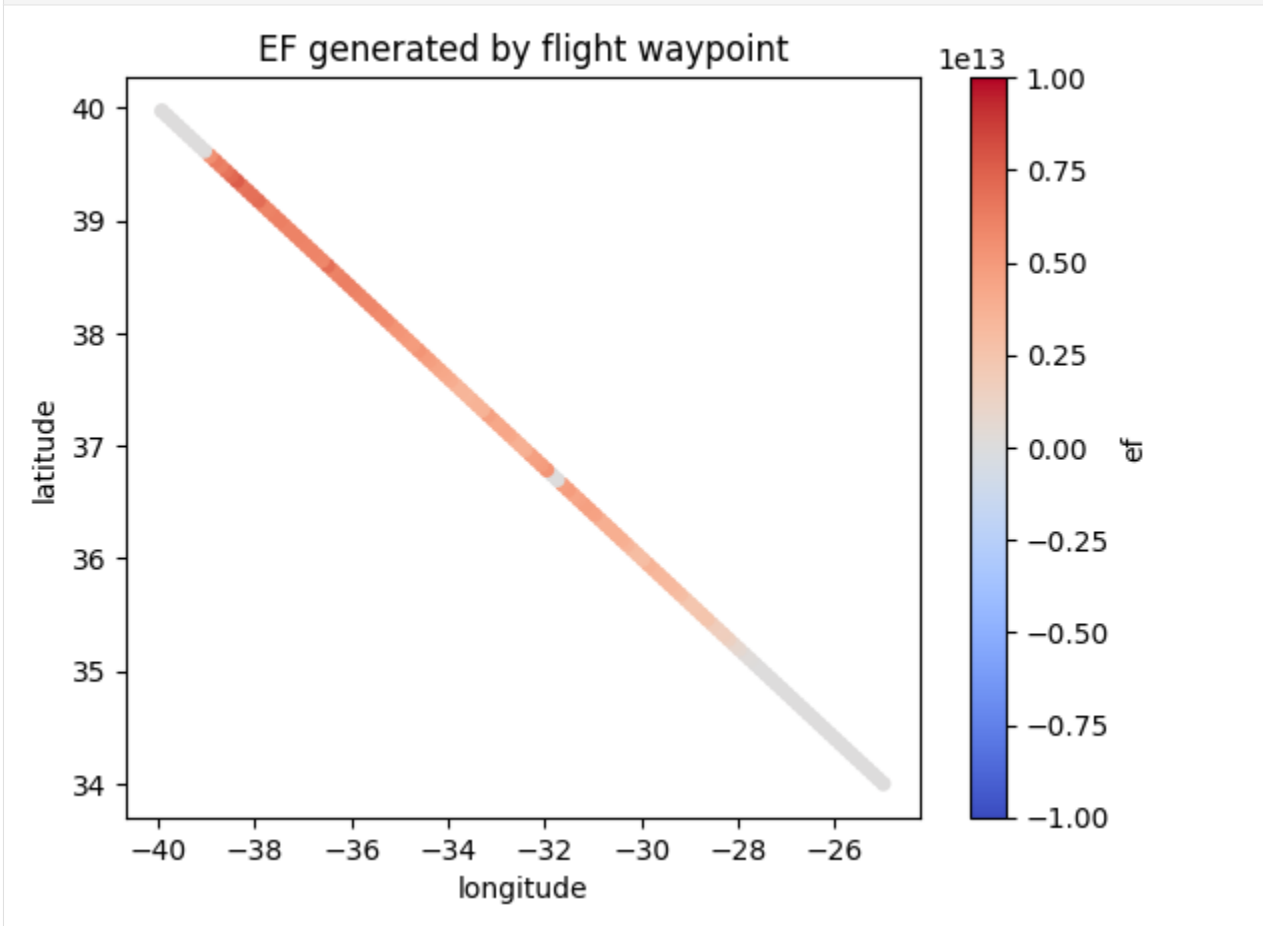

Next, we plot the evolution of the contrail as it advects along each flight segment

```
[10]: ax = plt.axes()

cocip.source.dataframe.plot(
    "longitude",
    "latitude",
    color="k",
    ax=ax,
    label="Flight path",
```

(continues on next page)

(continued from previous page)

```

)
cocip.contrail.plot.scatter(
    "longitude",
    "latitude",
    c="rf_lw",
    cmap="Reds",
    ax=ax,
    label="Contrail LW RF", # Contrail age?
)
ax.legend();

```

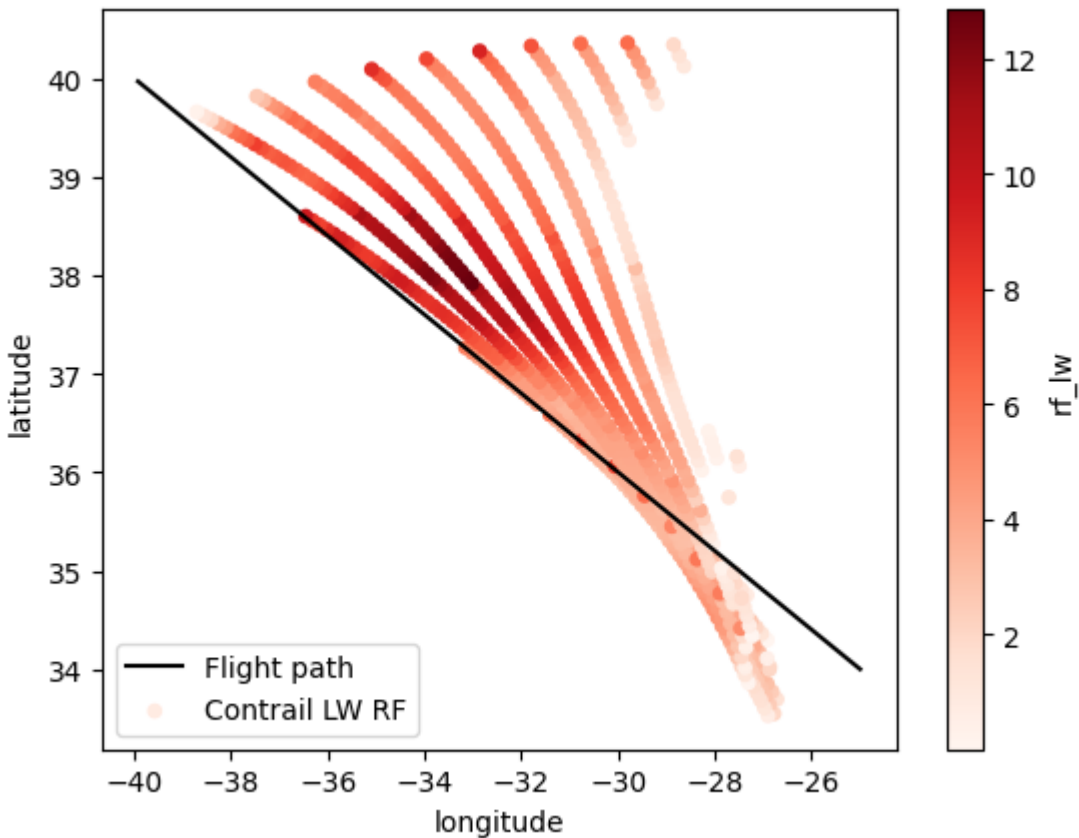

### 9.3 Working with Model Level Met

Meteorology providers may choose to compute their data on different vertical levels. For example, the ECMWF IFS product is computed on [137 model levels](#). The pressure of a given model level is not constant, but varies with time and horizontal position. The pressure at a given point can be computed [following ECMWF guidelines](#). This notebook uses the `metview` library to convert from ECMWF model levels to pressure levels.

The `metview` package can be difficult to install. [Installation with conda](#) may be the easiest way to get started. This notebook assumes a working installation of `metview`.

```
[1]: import os
```

(continues on next page)

(continued from previous page)

```
import cdsapi
import matplotlib.pyplot as plt
import metview as mv
import numpy as np
import pandas as pd
import xarray as xr

from pycontrails import Fleet, Flight, MetDataset
from pycontrails.datalib.ecmwf import PRESSURE_LEVEL_VARIABLES, SURFACE_VARIABLES
from pycontrails.models.cocip import Cocip
from pycontrails.models.humidity_scaling import HistogramMatching
from pycontrails.models.ps_model import PSFlight
```

### 9.3.1 Define CDS model level request

We make three requests to the CDS API.

- `ml_request` is a request for the model levels meteorology data
- `lnsp_request` is a request for the surface pressure data needed for interpolating from model levels to pressure levels
- `sl_request` is a request for the single level top of atmosphere radiation data needed for CoCiP

```
[2]: date = "2024-01-15"
time = list(range(18))
grid = "1/1"

ml_variables = ["t", "q", "u", "v", "w", "ciwc"]
sl_variables = ["tsr", "ttr"]

ml_request = {
    "levtype": "ml",
    "levellist": "70/to/90/by/1",
    "param": ml_variables,
    "date": date,
    "time": time,
    "grid": grid,
}

lnsp_request = {
    "levtype": "ml",
    "levelist": "1",
    "param": "lnsp",
    "date": date,
    "time": time,
    "grid": grid,
}

sl_request = {
    "levtype": "sfc",
    "product_type": "reanalysis",
```

(continues on next page)

(continued from previous page)

```

    "param": sl_variables,
    "date": date,
    "time": time,
    "grid": grid,
    "format": "netcdf",
}

```

### 9.3.2 Make the request

Download the data if it is not already sitting on disk. Depending on the load on the Copernicus server, we may get queued here for a while.

```

[3]: client = cdsapi.Client()

target = "ml.grib"
if not os.path.isfile(target):
    client.retrieve("reanalysis-era5-complete", ml_request, target)

target = "lnsp.grib"
if not os.path.isfile(target):
    client.retrieve("reanalysis-era5-complete", lnsp_request, target)

target = "sl.nc"
if not os.path.isfile(target):
    client.retrieve("reanalysis-era5-single-levels", sl_request, target)

```

### 9.3.3 Target pressure levels

In order to use the metview library to convert from model levels to pressure levels, we must specify target pressure levels for the re-interpolation.

Assuming a constant surface pressure of 1013.25 hPa, the table below shows that ECMWF model levels occur roughly every 10 hPa at altitudes for which contrails form. This informs how we set our target pressure levels: We define our target pressure levels ranging from 170 hPa to 390 hPa, spaced every 10 hPa. A finer spacing than this may be redundant (pycontrails models perform linear interpolation between pressure levels), and a coarser spacing would result in loss of information.

```

[4]: url = "https://confluence.ecmwf.int/display/UDOC/L137+model+level+definitions"
df = pd.read_html(url, na_values="-", index_col="n")[0].rename_axis("hybrid")
df.loc[70:90] # model levels 70 - 90 agree with our ml_request

```

```

[4]:

```

| hybrid | a [Pa]       | b        | ph [hPa] | pf [hPa] | Geopotential | Altitude [m] | \ |
|--------|--------------|----------|----------|----------|--------------|--------------|---|
| 70     | 15508.256836 | 0.011806 | 167.0450 | 163.0927 |              | 13077.79     |   |
| 71     | 16026.115234 | 0.014816 | 175.2731 | 171.1591 |              | 12771.64     |   |
| 72     | 16527.322266 | 0.018318 | 183.8344 | 179.5537 |              | 12467.99     |   |
| 73     | 17008.789063 | 0.022355 | 192.7389 | 188.2867 |              | 12166.81     |   |
| 74     | 17467.613281 | 0.026964 | 201.9969 | 197.3679 |              | 11868.08     |   |
| 75     | 17901.621094 | 0.032176 | 211.6186 | 206.8078 |              | 11571.79     |   |
| 76     | 18308.433594 | 0.038026 | 221.6146 | 216.6166 |              | 11277.92     |   |
| 77     | 18685.718750 | 0.044548 | 231.9954 | 226.8050 |              | 10986.70     |   |

(continues on next page)

(continued from previous page)

|        |                        |                 |                  |          |          |
|--------|------------------------|-----------------|------------------|----------|----------|
| 78     | 19031.289063           | 0.051773        | 242.7719         | 237.3837 | 10696.22 |
| 79     | 19343.511719           | 0.059728        | 253.9549         | 248.3634 | 10405.61 |
| 80     | 19620.042969           | 0.068448        | 265.5556         | 259.7553 | 10114.89 |
| 81     | 19859.390625           | 0.077958        | 277.5852         | 271.5704 | 9824.08  |
| 82     | 20059.931641           | 0.088286        | 290.0548         | 283.8200 | 9533.20  |
| 83     | 20219.664063           | 0.099462        | 302.9762         | 296.5155 | 9242.26  |
| 84     | 20337.863281           | 0.111505        | 316.3607         | 309.6684 | 8951.30  |
| 85     | 20412.308594           | 0.124448        | 330.2202         | 323.2904 | 8660.32  |
| 86     | 20442.078125           | 0.138313        | 344.5663         | 337.3932 | 8369.35  |
| 87     | 20425.718750           | 0.153125        | 359.4111         | 351.9887 | 8078.41  |
| 88     | 20361.816406           | 0.168910        | 374.7666         | 367.0889 | 7787.51  |
| 89     | 20249.511719           | 0.185689        | 390.6450         | 382.7058 | 7496.68  |
| 90     | 20087.085938           | 0.203491        | 407.0583         | 398.8516 | 7205.93  |
|        | Geometric Altitude [m] | Temperature [K] | Density [kg/m^3] |          |          |
| hybrid |                        |                 |                  |          |          |
| 70     | 13104.70               | 216.65          | 0.262244         |          |          |
| 71     | 12797.30               | 216.65          | 0.275215         |          |          |
| 72     | 12492.44               | 216.65          | 0.288713         |          |          |
| 73     | 12190.10               | 216.65          | 0.302755         |          |          |
| 74     | 11890.24               | 216.65          | 0.317357         |          |          |
| 75     | 11592.86               | 216.65          | 0.332536         |          |          |
| 76     | 11297.93               | 216.65          | 0.348308         |          |          |
| 77     | 11005.69               | 216.74          | 0.364545         |          |          |
| 78     | 10714.22               | 218.62          | 0.378253         |          |          |
| 79     | 10422.64               | 220.51          | 0.392358         |          |          |
| 80     | 10130.98               | 222.40          | 0.406868         |          |          |
| 81     | 9839.26                | 224.29          | 0.421790         |          |          |
| 82     | 9547.49                | 226.18          | 0.437130         |          |          |
| 83     | 9255.70                | 228.08          | 0.452897         |          |          |
| 84     | 8963.90                | 229.97          | 0.469097         |          |          |
| 85     | 8672.11                | 231.86          | 0.485737         |          |          |
| 86     | 8380.36                | 233.75          | 0.502825         |          |          |
| 87     | 8088.67                | 235.64          | 0.520367         |          |          |
| 88     | 7797.04                | 237.53          | 0.538370         |          |          |
| 89     | 7505.51                | 239.42          | 0.556842         |          |          |
| 90     | 7214.09                | 241.31          | 0.575790         |          |          |

### 9.3.4 Interpolate from model levels to pressure levels

We use the `mv1_ml2hPa` metview function to interpolate from model levels to pressure levels. This function has some constraints:

- Only a single met parameter can be interpolated in a given function call
- Only a single time can be interpolated in a given function call
- The target pressure levels are assumed to be integers

We loop over all parameters and times to interpolate each parameter at each time. We then concatenate the results into a single `xr.Dataset`.

```
[5]: pressures = np.arange(170, 400, 10)

ds_dict = {}
for param in ml_variables:
    da_list = []
    for t in time:
        lnspl = mv.read(source="lnsp.grib", time=t)
        fsm1 = mv.read(source="ml.grib", param=param, time=t)
        fspl = mv.mvl_ml2hPa(lnspl, fsm1, pressures)
        ds = fspl.to_dataset()
        da = ds.expand_dims("time")[param]
        da_list.append(da)

    da = xr.concat(da_list, dim="time")
    ds_dict[param] = da

ds = xr.Dataset(ds_dict)
```

```
[6]: # Ready the Dataset for pycontrails
met = MetDataset(
    ds.rename(isobaricInhPa="level"),
    provider="ECMWF",
    dataset="ERA5",
    product="reanalysis",
)
met.standardize_variables(PRESSURE_LEVEL_VARIABLES)
met
```

[6]: MetDataset with data:

```
<xarray.Dataset> Size: 647MB
Dimensions:                (time: 18, level: 23, latitude: 181,
                             longitude: 360)
Coordinates:
  * time                    (time) datetime64[ns] 144B 2024-01-1...
  step                    timedelta64[ns] 8B 00:00:00
  * level                   (level) float64 184B 170.0 ... 390.0
  * latitude               (latitude) float64 1kB -90.0 ... 90.0
  valid_time              (time) datetime64[ns] 144B 2024-01-1...
  * longitude              (longitude) float64 3kB -180.0 ... 1...
  air_pressure            (level) float32 92B 1.7e+04 ... 3.9e+04
  altitude                (level) float32 92B 1.281e+04 ... 7...
Data variables:
  air_temperature         (longitude, latitude, level, time) float32...
↪ 108MB ...
  specific_humidity       (longitude, latitude, level, time) float32...
↪ 108MB ...
  eastward_wind           (longitude, latitude, level, time) float32...
↪ 108MB ...
  northward_wind         (longitude, latitude, level, time) float32...
↪ 108MB ...
  lagrangian_tendency_of_air_pressure (longitude, latitude, level, time) float32...
↪ 108MB ...
```

(continues on next page)

(continued from previous page)

```

specific_cloud_ice_water_content    (longitude, latitude, level, time) float32...
↳ 108MB ...
Attributes:
  provider:  ECMWF
  dataset:   ERA5
  product:   reanalysis

```

### 9.3.5 Missing values

Converting from model levels to pressure levels will result in some missing values. These are plotted below.

Points at which the surface pressure is significantly lower than the 1013.25 hPa reference surface pressure will result in missing values at the lowest-altitude target pressure levels. Additional model levels can be downloaded to decrease the number of missing values. Missing values do not occur at higher-altitude target pressure levels.

```

[7]: da = met.data["air_temperature"]
da.isnull().groupby("level").mean(...).plot()
plt.ylabel("Proportion of missing values")
plt.title("Missing values by pressure level");

```

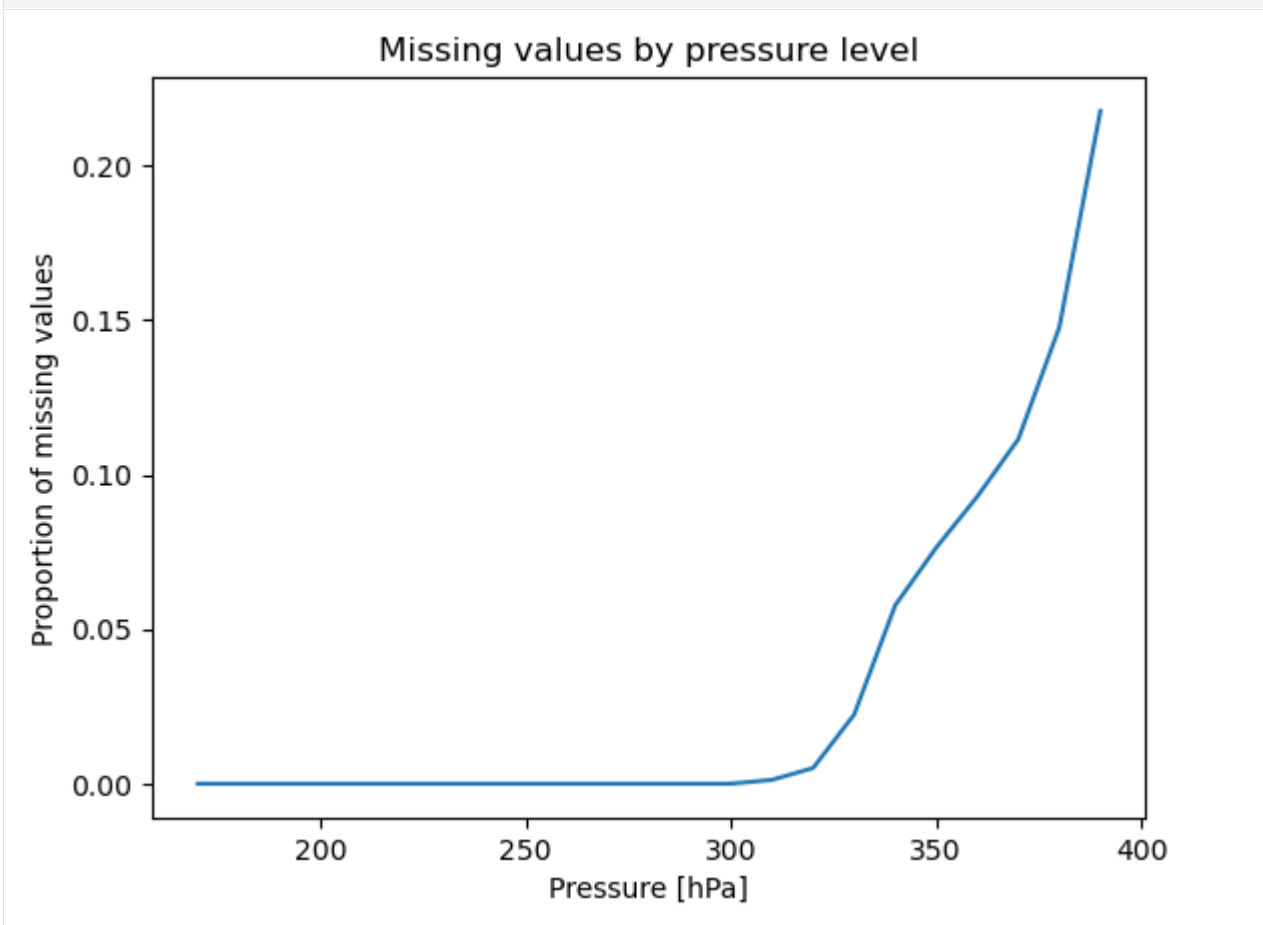

```

[8]: # There are no missing values above 310 hPa
tmp = da.isnull().isel(time=0).sel(level=slice(310, None))

```

(continues on next page)



(continued from previous page)

```
tmp.plot(x="longitude", y="latitude", add_colorbar=False, col="level", col_wrap=3)
plt.gcf().suptitle("Position of missing values by pressure level", y=1.02);
```

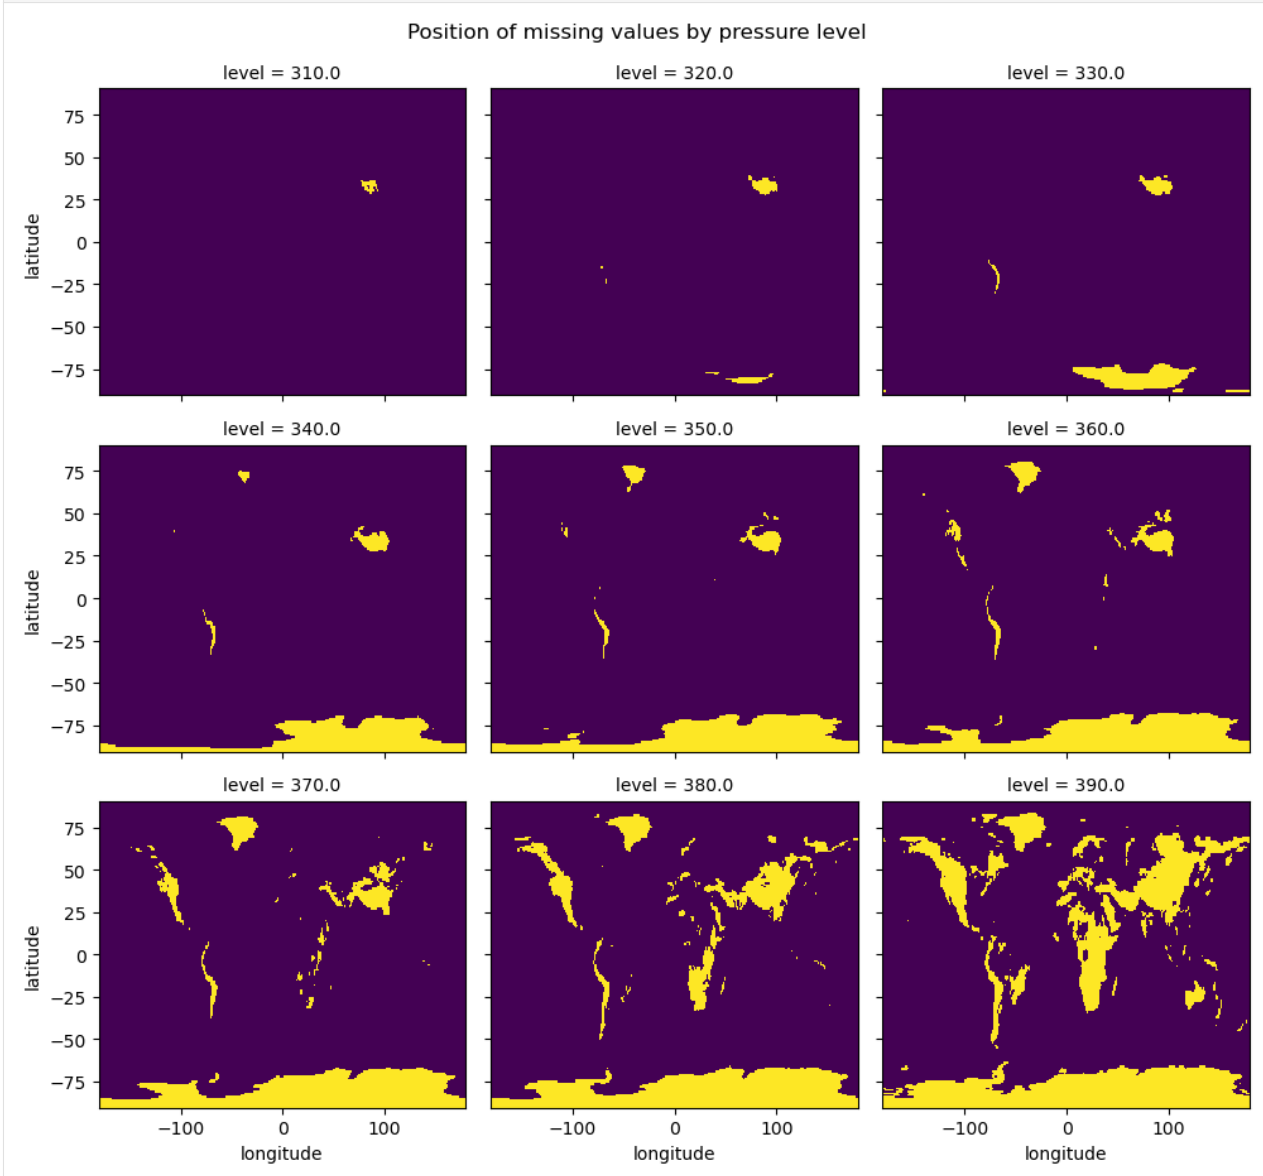

### 9.3.6 Single level data

The single level data is much easier to work with. We can read it directly with xarray using the netcdf4 engine.

```
[9]: # Ready the single level data for pycontrails
ds = xr.open_dataset("sl.nc")
ds = ds.expand_dims(level=[-1])

rad = MetDataset(ds, provider="ECMWF", dataset="ERA5", product="reanalysis")
rad.standardize_variables(SURFACE_VARIABLES)
rad
```

[9]: MetDataset with data:

```
<xarray.Dataset> Size: 9MB
Dimensions:                (level: 1, latitude: 181, time: 18,
                             longitude: 360)
Coordinates:
  * level                   (level) float64 8B -1.0
  * latitude                (latitude) float64 1kB -90.0 -89.0 ... 89.0 90.0
  * time                    (time) datetime64[ns] 144B 2024-01-15 ... 2024...
  * longitude               (longitude) float64 3kB -180.0 -179.0 ... 179.0
Data variables:
  top_net_solar_radiation  (longitude, latitude, level, time) float32 5MB ...
  top_net_thermal_radiation (longitude, latitude, level, time) float32 5MB ...
Attributes:
  Conventions:  CF-1.6
  history:      2024-03-05 06:57:34 GMT by grib_to_netcdf-2.25.1: /opt/ecmw...
  provider:     ECMWF
  dataset:      ERA5
  product:      reanalysis
```

### 9.3.7 Download ADS-B

For flight trajectories, we use a sample from [Contrails API](#). We artificially shift the times of the flight trajectories to overlap the times of the ERA5 data.

```
[10]: df = pd.read_csv("https://apidocs.contrails.org/_static/fleet_sample.csv", parse_dates=[
    ↪ "time"])
df["time"] = df["time"].dt.tz_convert(None)
df = df.rename(columns={"altitude": "altitude_ft"})

# Shift time to the date of interest
df["time"] = df["time"] + (pd.Timestamp(date) - df["time"].min())

# Convert to a pycontrails Fleet instance, keeping only aircraft type covered by the PS_
↪ model
ps_flight = PSFlight()
flights = []
for flight_id, group in df.groupby("flight_id"):
    aircraft_type = group["aircraft_type"].iloc[0]
    if not ps_flight.check_aircraft_type_availability(aircraft_type, raise_error=False):
        continue

    engine_uid = group["engine_uid"].iloc[0]
    group = group.drop(columns=["aircraft_type", "engine_uid", "flight_id"])
    flight = Flight(group, aircraft_type=aircraft_type, engine_uid=engine_uid, flight_
    ↪ id=flight_id)
    flights.append(flight)

fleet = Fleet.from_seq(flights)
```

```
[11]: ax = plt.subplot()
      for flight in flights:
          flight.plot(ax=ax, alpha=0.3)
```

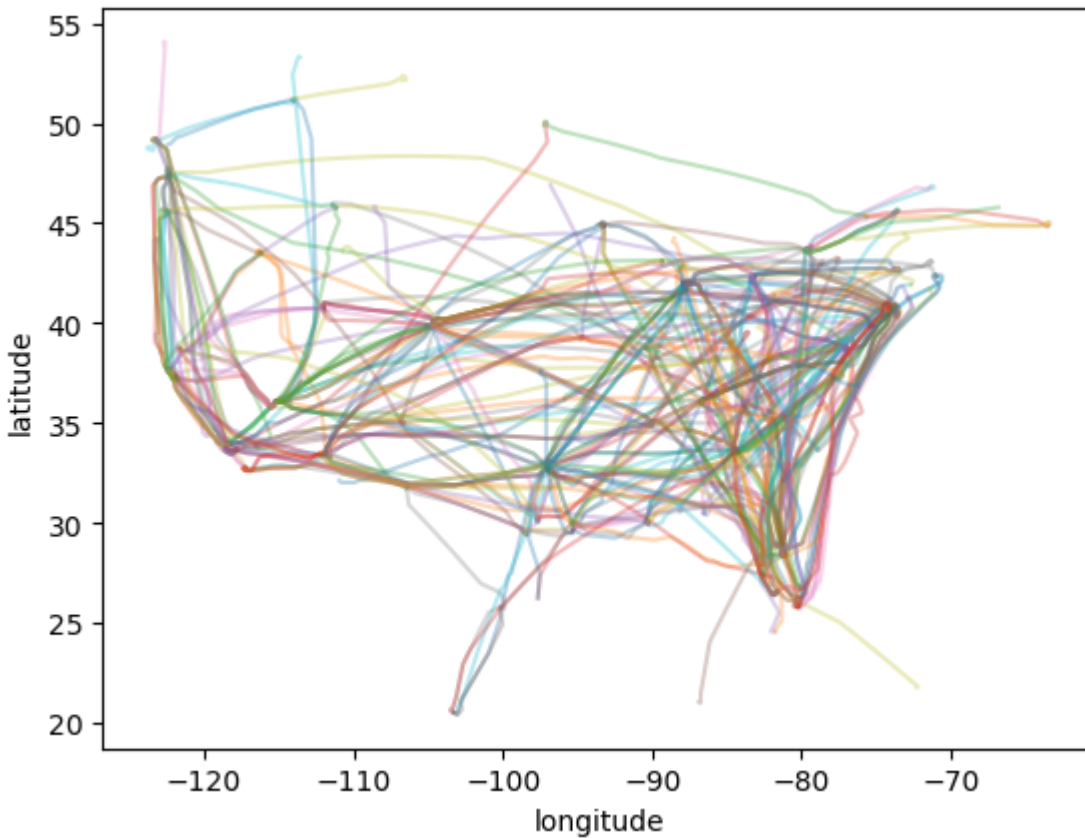

### 9.3.8 Run CoCiP

We run CoCiP on the model-level ERA5 data.

```
[12]: cocip = Cocip(
      met=met,
      rad=rad,
      dt_integration="5 min",
      max_age="12 hours",
      aircraft_performance=PSFlight(),
      humidity_scaling=HistogramMatching(),
  )
  cocip_pred = cocip.eval(fleet)
  contrail = cocip.contrail
```

### 9.3.9 Visualize output

```
[13]: ax = plt.subplot()
      for flight in flights:
          flight.plot(ax=ax, color="gray", alpha=0.05)

      contrail.plot.scatter(
          x="longitude",
          y="latitude",
          s=contrail["width"] / 1000000,
          c=contrail["tau_contrail"],
          vmin=0,
          vmax=0.3,
          alpha=0.05,
          zorder=2,
          ax=ax,
      );
```

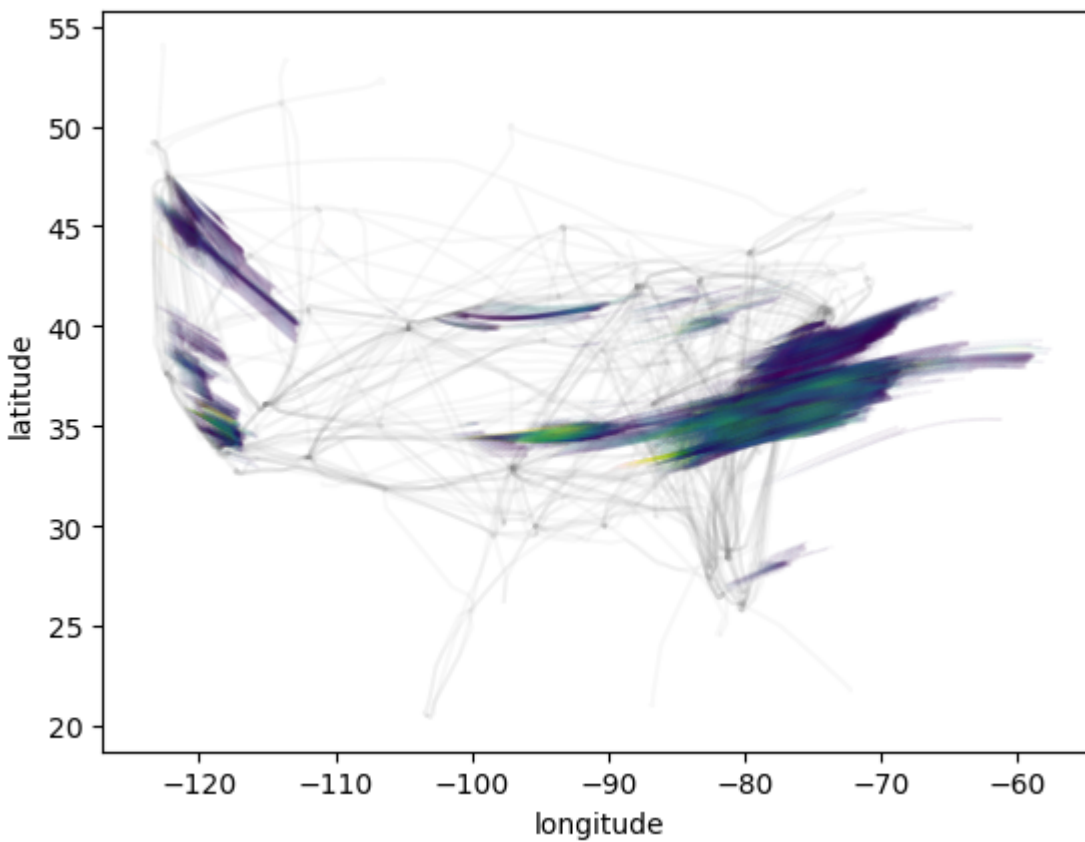

## SPECIFIC HUMIDITY INTERPOLATION

This document discusses best practices for interpolating gridded specific humidity. The focus here is on ECMWF data, but the principles apply to other datasets as well.

Among all meteorology variables, humidity plays a special role in contrail prediction. Generally, contrails will not persist outside of ice super-saturated regions. The energy forcing predictions from CoCiP are themselves extremely sensitive to humidity. Small perturbations in humidity can lead to large changes in radiative forcing.

### 10.1 ERA5 data

In this notebook, we use the ARCOERA5 interface to the publicly available [ARCO ERA5](#) “model-level” data.

```
[1]: import matplotlib.pyplot as plt
import numpy as np
import seaborn as sns
import xarray as xr
from scipy.interpolate import PchipInterpolator

from pycontrails.core import models
from pycontrails.datalib.ecmwf import ARCOERA5
from pycontrails.physics import thermo
```

#### 10.1.1 Regrid to pressure levels

ERA5 data is often provided at discrete pressure levels. Below we regrid the “model level” data from ARCO ERA5 to discrete pressure levels. The spacing of these vertical pressure levels has been chosen to match common spacing of the ERA5 data.

While gridded forecast and reanalysis data is far from perfect, the coarseness of the gridded product can introduce additional errors when interpolating between pressure levels. A model such as CoCiP will proceed with higher precision as additional pressure levels are included in the met data. **We recommend using the highest resolution data available that you can afford to process.** Many of the interpolation artifacts discussed below become negligible when using pressure levels spaced at 10 hPa or less. At cruising altitudes, this is roughly a vertical resolution of 1000 ft or less.

Below we create both a coarsely and finely spaced pressure level dataset for comparison purposes.

```
[2]: pl_coarse = [100, 150, 200, 250, 300, 350, 400]
pl_fine = [200, 210, 220, 230, 240, 250, 260, 270, 280, 290, 300]

time = "2021-03-14T15"
```

(continues on next page)

(continued from previous page)

```

variables = ["t", "q", "ciwc"]

arco_coarse = ARCOERA5(time, variables, pl_coarse)
ds_coarse = arco_coarse.open_metdataset().data
ds_coarse.load()

arco_fine = ARCOERA5(time, variables, pl_fine)
ds_fine = arco_fine.open_metdataset().data
ds_fine.load();

```

```

[3]: # Add RHi to the datasets
for ds in (ds_coarse, ds_fine):
    ds["rhi"] = thermo.rhi(ds["specific_humidity"], ds["air_temperature"], ds["level"] *
↪ 100.0)

```

```

[4]: ds_fine["specific_humidity"].squeeze().plot(col="level", col_wrap=4, cmap="Blues");

```

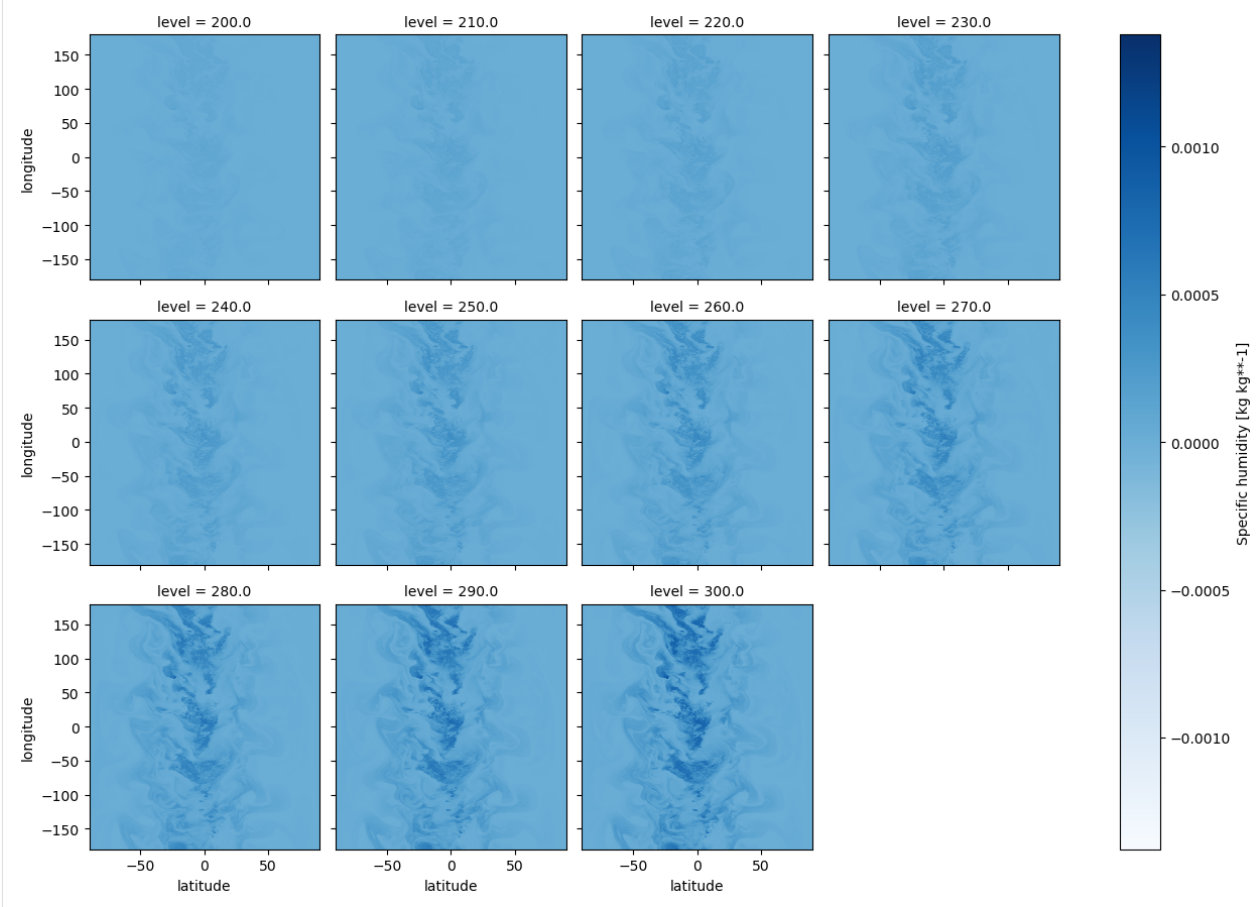

## 10.2 Lapse rates

**Lapse rate** typically refers to the rate at which temperature decreases with atmospheric height. Similarly, we can also consider the rate at which specific humidity or cloud ice water content decreases with height. The lapse rate of specific humidity exhibits important differences from the classic temperature lapse rate.

One can use thermodynamics to derive a [theoretical temperature lapse rate](#). Below, we compute the average temperature of the ERA5 data at each pressure level as another way of thinking about the temperature lapse rate.

```
[5]: ds_coarse_mean = ds_coarse.groupby("level").mean(...)  
     ds_fine_mean = ds_fine.groupby("level").mean(...)
```

### 10.2.1 Temperature lapse rate

Below, we show the mean temperature profile over the entire domain. Importantly, the **temperature profile is roughly linear over the pressure levels** used here.

```
[6]: fig, ax = plt.subplots()  
  
     ax.scatter(ds_fine_mean["air_temperature"].level, ds_fine_mean["air_temperature"], label=  
     ↪ "fine")  
     ax.plot(ds_fine_mean["air_temperature"].level, ds_fine_mean["air_temperature"])  
  
     ax.scatter(  
         ds_coarse_mean["air_temperature"].level, ds_coarse_mean["air_temperature"], label=  
         ↪ "coarse"  
     )  
     ax.plot(ds_coarse_mean["air_temperature"].level, ds_coarse_mean["air_temperature"])  
  
     ax.legend()  
     ax.set_ylabel("Temperature (K)")  
     ax.set_xlabel("Pressure (hPa)");
```

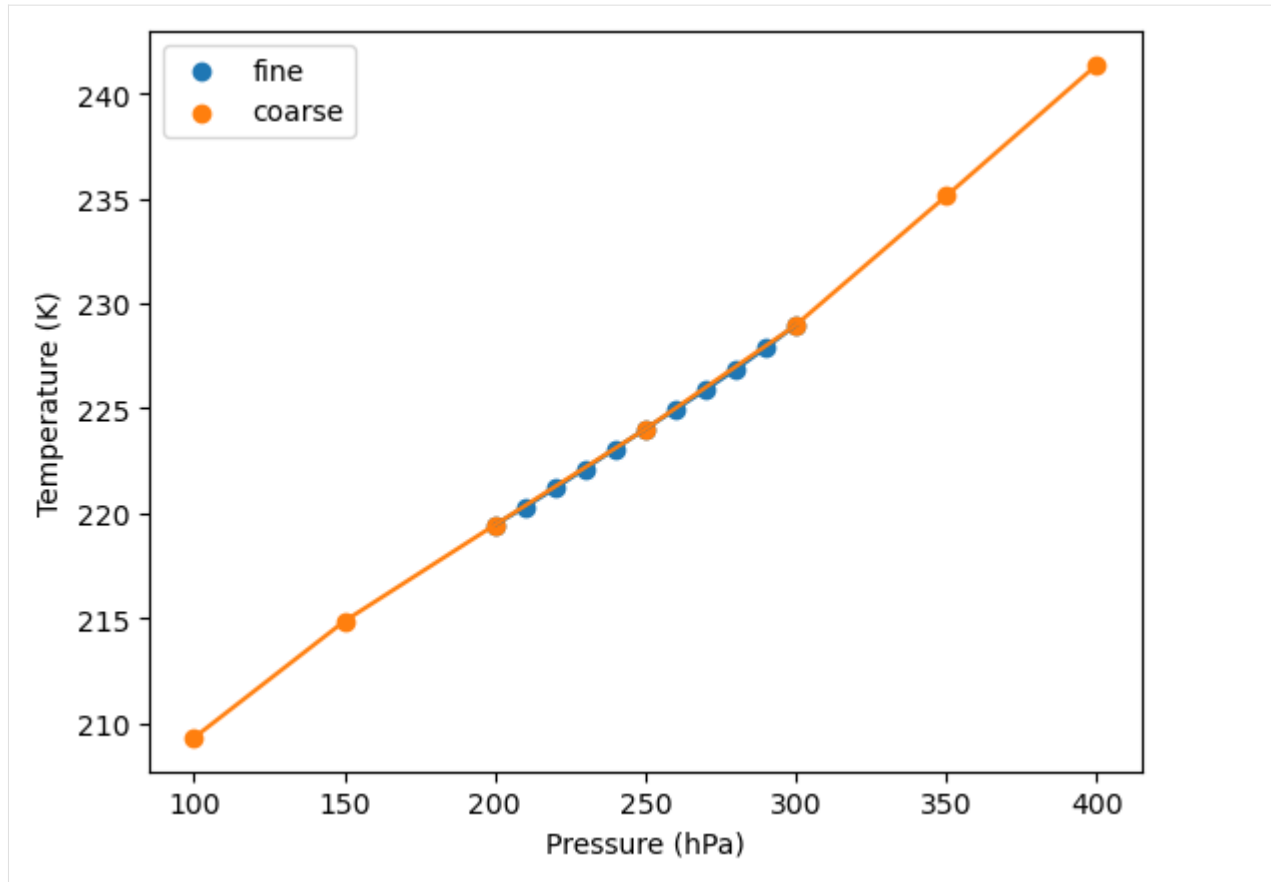

## 10.2.2 Specific humidity lapse rate

Make the same plot for specific humidity. Importantly, the specific humidity profile is **nonlinear**. In particular, the plot shows a pronounced upward concavity, primarily because saturation vapor pressure [varies exponentially with temperature](#).

```
[7]: fig, ax = plt.subplots()

ax.scatter(ds_fine_mean["specific_humidity"].level, ds_fine_mean["specific_humidity"],
           label="fine")
ax.plot(ds_fine_mean["specific_humidity"].level, ds_fine_mean["specific_humidity"])

ax.scatter(
    ds_coarse_mean["specific_humidity"].level, ds_coarse_mean["specific_humidity"],
    label="coarse"
)
ax.plot(ds_coarse_mean["specific_humidity"].level, ds_coarse_mean["specific_humidity"])

ax.legend()
ax.set_ylabel("Specific humidity (kg/kg)")
ax.set_xlabel("Pressure (hPa)");
```



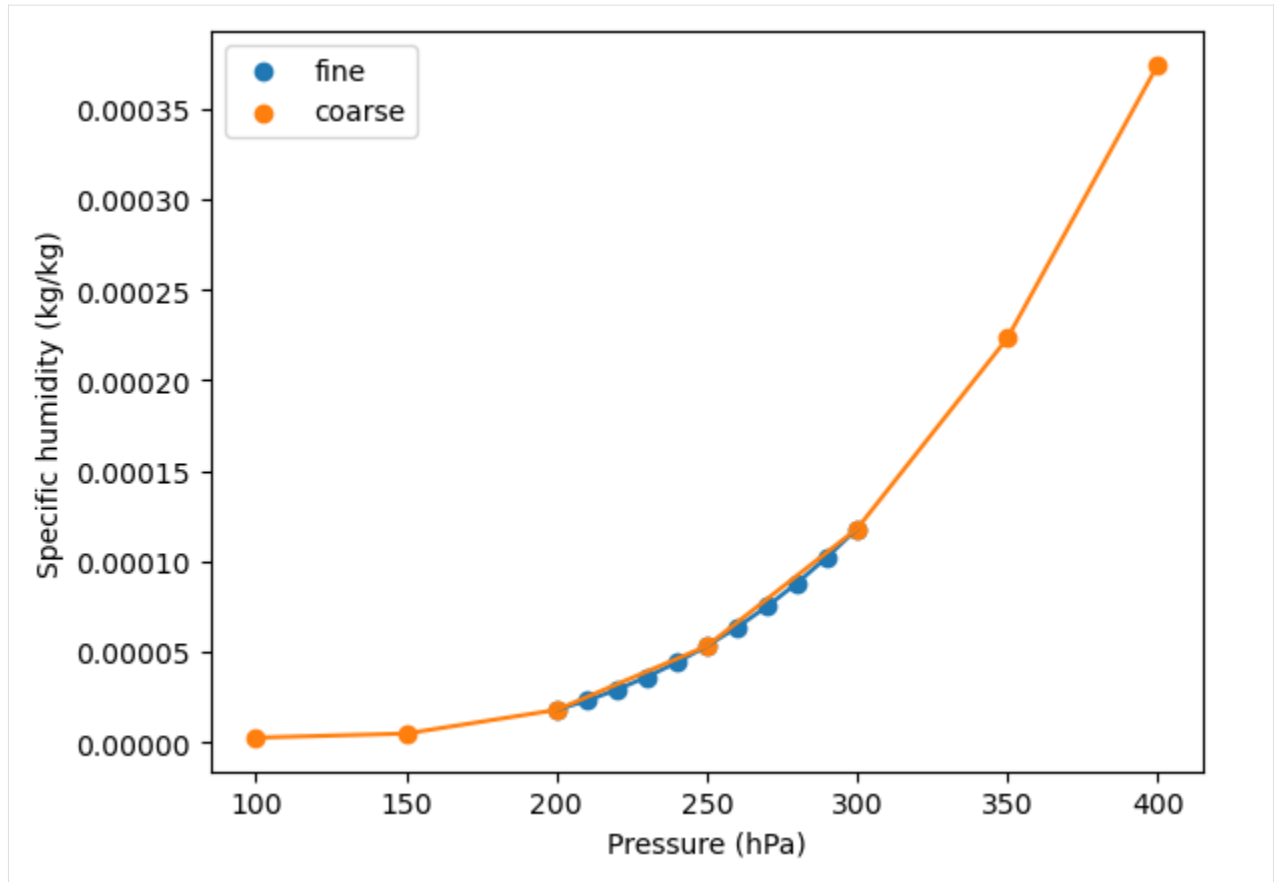

### 10.2.3 Cloud ice water content lapse rate

Showing the same profile for cloud ice water content. This variable is somewhat less critical because CoCiP does not have a high sensitivity on it. We include it here as a point of comparison.

```
[8]: fig, ax = plt.subplots()

ax.scatter(
    ds_fine_mean["specific_cloud_ice_water_content"].level,
    ds_fine_mean["specific_cloud_ice_water_content"],
    label="fine",
)
ax.plot(
    ds_fine_mean["specific_cloud_ice_water_content"].level,
    ds_fine_mean["specific_cloud_ice_water_content"],
)

ax.scatter(
    ds_coarse_mean["specific_cloud_ice_water_content"].level,
    ds_coarse_mean["specific_cloud_ice_water_content"],
    label="coarse",
)
ax.plot(
```

(continues on next page)

(continued from previous page)

```

ds_coarse_mean["specific_cloud_ice_water_content"].level,
ds_coarse_mean["specific_cloud_ice_water_content"],
)

ax.legend()
ax.set_ylabel("Cloud ice (kg/kg)")
ax.set_xlabel("Pressure (hPa)");

```

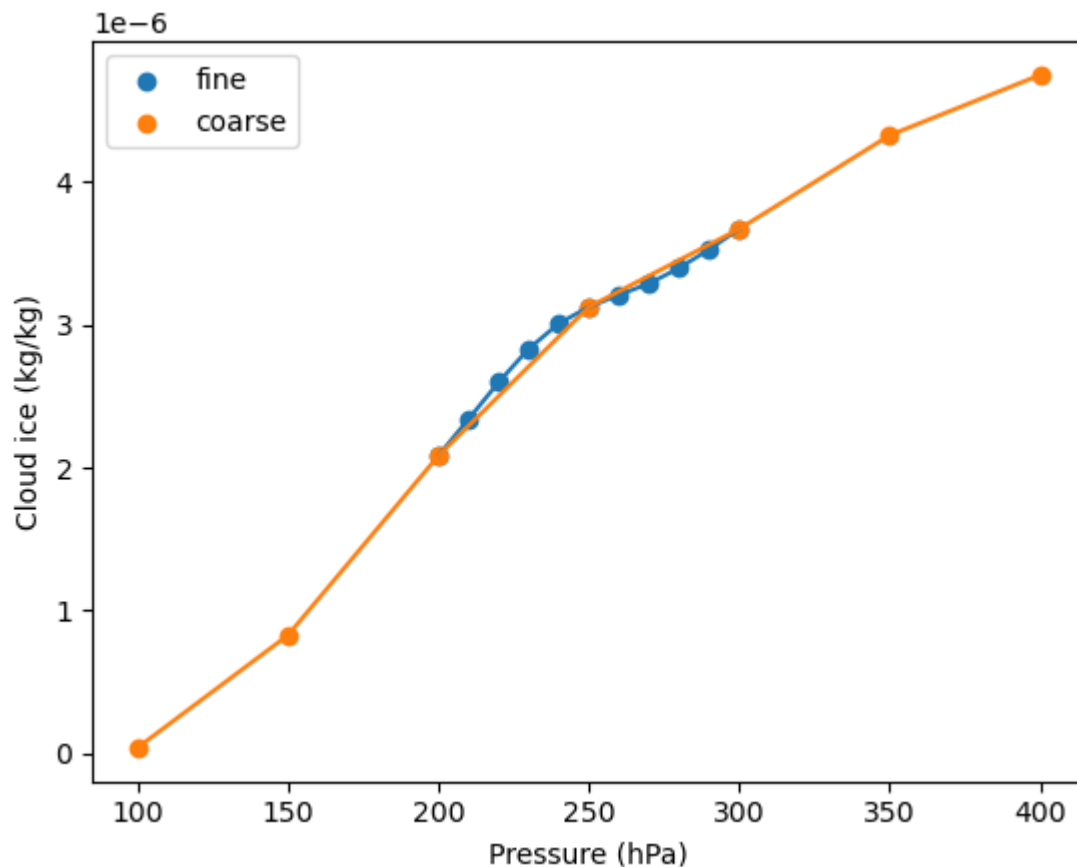

## 10.3 The problem

### A nonlinear lapse rate may lead to bias if using linear interpolation.

Because the specific humidity lapse rate has a positive second derivative, a chord connecting two points on the lapse rate curve will lie above the curve. This means that linear interpolation will tend to overestimate the specific humidity on average at intermediate points.

We demonstrate this below by comparing the coarse and fine pressure level datasets. We also construct a monotonic cubic spline from the coarse pressure level lapse rate as a means of approximating the fine pressure level lapse rate. In particular, this spline approximation is much closer to the fine pressure level lapse rate than a naive linear approximation of the coarse pressure level lapse rate.

```
[9]: fig, ax = plt.subplots()

ax.scatter(ds_fine_mean["specific_humidity"].level, ds_fine_mean["specific_humidity"],
↪label="fine")
ax.plot(ds_fine_mean["specific_humidity"].level, ds_fine_mean["specific_humidity"])

ax.scatter(
    ds_coarse_mean["specific_humidity"].level, ds_coarse_mean["specific_humidity"],
↪label="coarse"
)
ax.plot(ds_coarse_mean["specific_humidity"].level, ds_coarse_mean["specific_humidity"])

pchip = PchipInterpolator(
    ds_coarse_mean["specific_humidity"].level, ds_coarse_mean["specific_humidity"]
)
p = np.linspace(100, 400, 100)
ax.plot(p, pchip(p), label="spline approx", linestyle="--")
ax.legend()

ax.legend()
ax.set_ylabel("Specific humidity (kg/kg)")
ax.set_xlabel("Pressure (hPa)")

ax.set_xlim(190, 310)
ax.set_ylim(0, 0.00015);
```

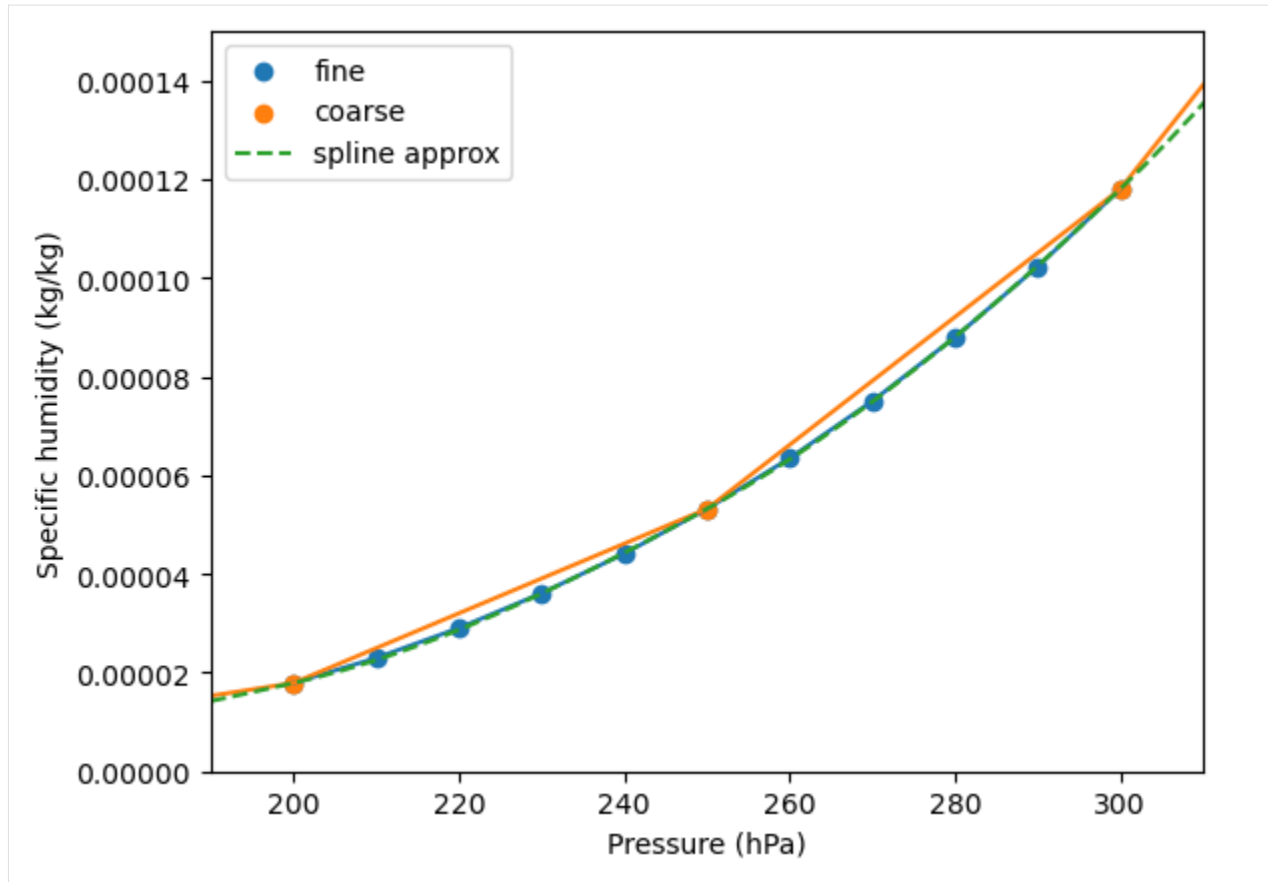

Below, we ignore the fine pressure level dataset lapse rate and only use the coarse pressure level dataset lapse rate to compute an interpolated specific humidity value. In particular, we compare two interpolation methods:

- naive linear interpolation
- monotonic cubic spline interpolation

In light of the previous plot, we expect the monotonic cubic spline to better approximate the lapse rate associated to the fine pressure level dataset. The plot below shows that the two interpolation methods can differ by as much as 5%. This error is a significant, and suggests that linear interpolation in specific humidity may lead to a bias in CoCiP when using coarse pressure level met data.

This sort of data omission experiment is pursued more *rigorously below*.

```
[10]: fig, ax = plt.subplots()

ax.scatter(
    ds_coarse_mean["specific_humidity"].level,
    ds_coarse_mean["specific_humidity"],
    label="linear interp",
)
ax.plot(ds_coarse_mean["specific_humidity"].level, ds_coarse_mean["specific_humidity"])

ax.plot(p, pchip(p), label="spline interp")
ax.legend()
ax.set_xlim(245, 305)
ax.set_ylim(0.000005, 0.00012)
```

(continues on next page)

(continued from previous page)

```

p0 = 275
y0 = ds_coarse_mean["specific_humidity"].interp(level=p0).values
y1 = pchip(p0)
pct = (y0 - y1) / y1 * 100.0

ax.scatter([p0, p0], [y0, y1], color="red")
ax.annotate(f"linear interp: {y0:.7f}", (p0, y0), (p0 + 5, y0))
ax.annotate(f"spline interp: {y1:.7f}", (p0, y1), (p0 + 5, y1))
ax.set_title(f"Interpolation methodologies differ by {pct:.1f}% at {p0} hPa");

```

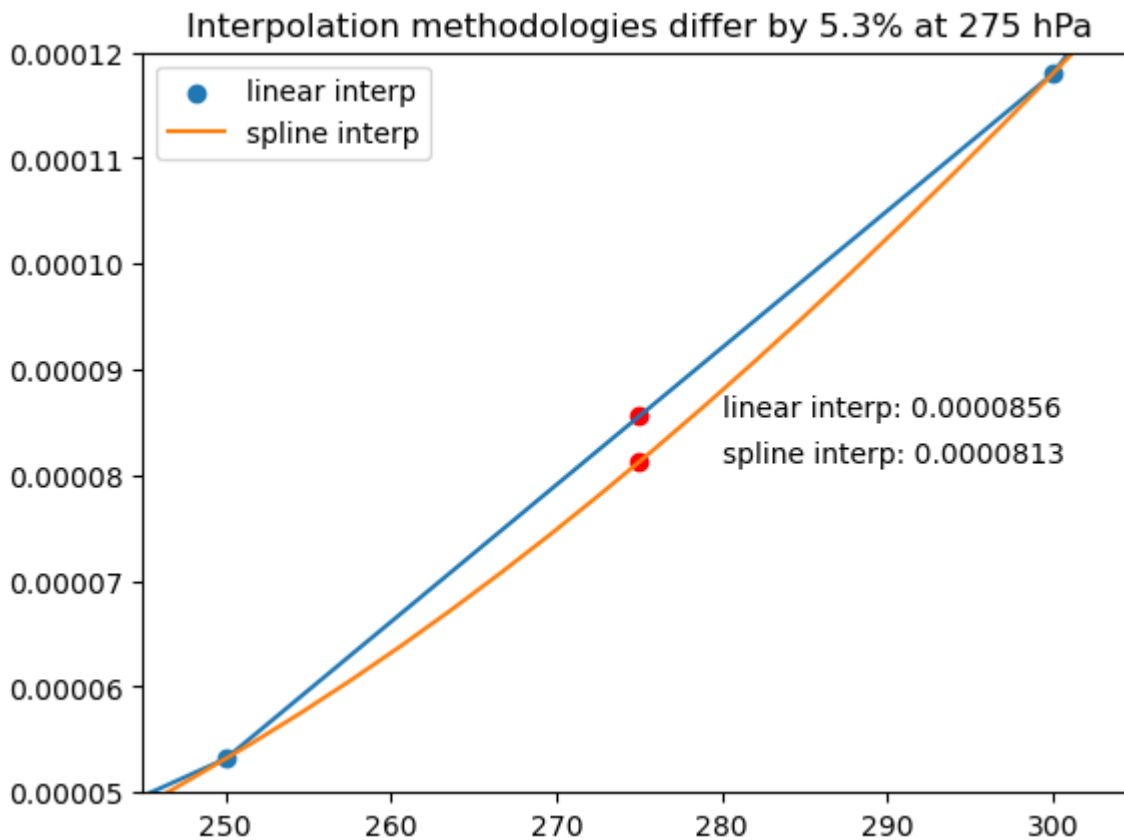

## 10.4 Solutions

### 10.4.1 Interpolate in the log-log domain

Because both pressure and specific humidity are positive quantities that span several orders of magnitude, it is natural to interpolate in the logarithm of each. Below we plot the lapse rate in the log-log domain. Visibly, the log-log lapse rate is more linear than the lapse rate in the original domain.

```

[11]: fig, ax = plt.subplots()

ax.scatter(ds_fine_mean["specific_humidity"].level, ds_fine_mean["specific_humidity"], )

```

(continues on next page)

(continued from previous page)

```
↪label="fine")
ax.plot(ds_fine_mean["specific_humidity"].level, ds_fine_mean["specific_humidity"])

ax.scatter(
    ds_coarse_mean["specific_humidity"].level, ds_coarse_mean["specific_humidity"],
    ↪label="coarse"
)
ax.plot(ds_coarse_mean["specific_humidity"].level, ds_coarse_mean["specific_humidity"])

ax.set_xscale("log")
ax.set_yscale("log")

ax.legend()
ax.set_ylabel("Specific humidity (kg/kg)")
ax.set_xlabel("Pressure (hPa)");
```

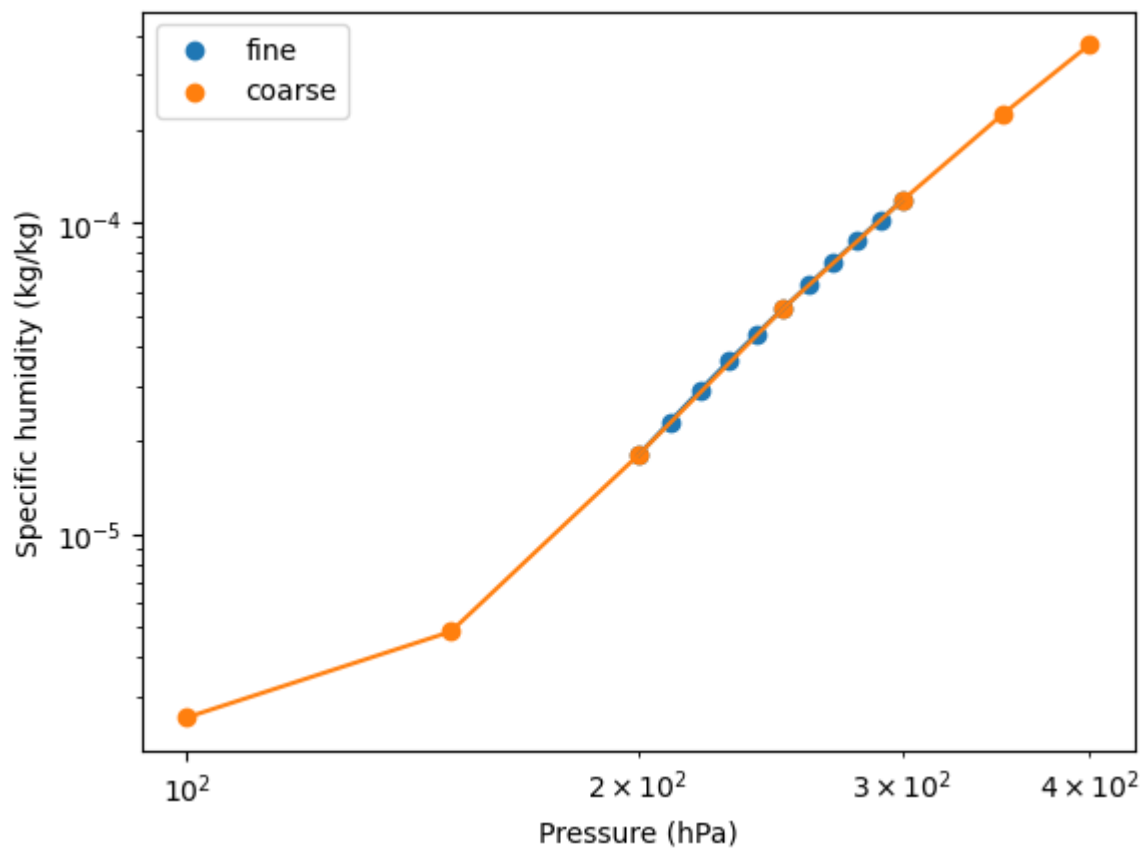

## 10.4.2 Use the cubic-spline to linearize the lapse rate

We can manually transform the lapse rate curve by normalizing the pressure domain by the lapse rate. We use the previously computed cubic spline to achieve this. For this approach to be applicable generally, the lapse rate must be monotonic.

```
[12]: fig, ax = plt.subplots()

ax.scatter(
    pchip(ds_fine_mean["specific_humidity"].level), ds_fine_mean["specific_humidity"],
    label="fine"
)
ax.plot(pchip(ds_fine_mean["specific_humidity"].level), ds_fine_mean["specific_humidity"])

ax.scatter(
    pchip(ds_coarse_mean["specific_humidity"].level),
    ds_coarse_mean["specific_humidity"],
    label="coarse",
)
ax.plot(pchip(ds_coarse_mean["specific_humidity"].level), ds_coarse_mean["specific_humidity"])

ax.legend()
ax.set_ylabel("Specific humidity (kg/kg)")
ax.set_xlabel("Transformed pressured");
```

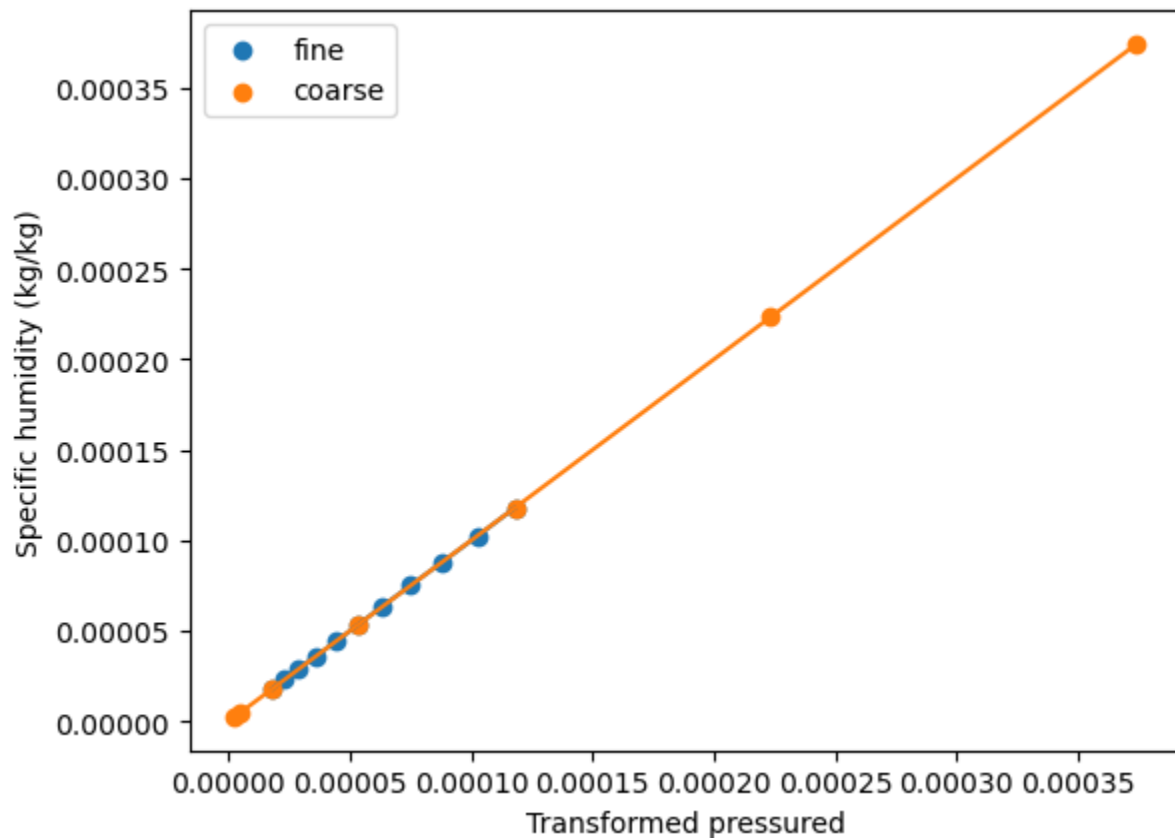

### 10.4.3 Interpolate in the gridded RHi space

Gridded relative humidity over ice (RHi) does not exhibit a clear nonlinear lapse rate. Instead of interpolating specific humidity, we could instead interpolate gridded RHi directly. This approach is intuitive to explain, but also has some drawbacks. In particular, the RHi field is not defined in regions where the temperature is above freezing. This means that we would need to use a different interpolation method in these regions.

## 10.5 Data Omission Experiment

To evaluate each interpolation method, we perform a data omission experiment. For each pressure level in the fine pressure level dataset, we compute the interpolated specific humidity using the coarse pressure level dataset. We then compare this interpolated value to the value in the fine pressure level dataset.

We run this experiment for the four pressure levels 260, 270, 280, and 290 hPa. These are situated between the coarse pressure level dataset levels at 250 and 300 hPa.

### 10.5.1 Error metrics

We look at mean squared error (MSE) and mean absolute error (MAE) for each interpolation method. Instead of working with the full dataset, we compute error metrics only near the ISSR threshold. This is the region of the atmosphere where the specific humidity is most important for contrail prediction.

```
[13]: def run_experiment(level):
    """Compute RHi using different interpolation methods."""

    rhi_true = ds_fine["rhi"].sel(level=level)
    t_true = ds_fine["air_temperature"].sel(level=level)

    q_top_bottom = ds_coarse["specific_humidity"].sel(level=[250, 300])
    rhi_top_bottom = ds_coarse["rhi"].sel(level=[250, 300])

    # linear-q interpolation
    tmp = q_top_bottom.interp(level=level)
    linear_q = thermo.rhi(tmp, t_true, level * 100.0)

    # log-q-log-p interpolation
    tmp = q_top_bottom.where(q_top_bottom > 0)
    tmp = np.log(tmp)
    tmp = tmp.assign_coords(level=np.log(tmp["level"]))
    tmp = tmp.interp(level=np.log(level))
    tmp = np.exp(tmp)
    log_q_log_p = thermo.rhi(tmp, t_true, level * 100.0)

    # cubic-spline; using the pre-computed spline in pycontrails
    # the `models._load_spline()` spline was computed in a similar way to the
    # spline created earlier in this notebook
    pchip = models._load_spline()
    tmp = q_top_bottom.assign_coords(level=pchip(q_top_bottom["level"]))
    tmp = tmp.interp(level=pchip(level))
    cubic_spline = thermo.rhi(tmp, t_true, level * 100.0)
```

(continues on next page)



(continued from previous page)

```

# interp in rhi space
linear_rhi = rhi_top_bottom.interp(level=level)

return rhi_true, linear_q, log_q_log_p, cubic_spline, linear_rhi

rhi_true_list = []
linear_q_list = []
log_q_log_p_list = []
cubic_spline_list = []
linear_rhi_list = []

for level in (260, 270, 280, 290):
    rhi_true, linear_q, log_q_log_p, cubic_spline, linear_rhi = run_experiment(level)
    rhi_true_list.append(rhi_true.expand_dims("level"))
    linear_q_list.append(linear_q.expand_dims("level"))
    log_q_log_p_list.append(log_q_log_p.expand_dims("level"))
    cubic_spline_list.append(cubic_spline.expand_dims("level"))
    linear_rhi_list.append(linear_rhi.expand_dims("level"))

rhi_true = xr.concat(rhi_true_list, "level")
linear_q = xr.concat(linear_q_list, "level")
log_q_log_p = xr.concat(log_q_log_p_list, "level")
cubic_spline = xr.concat(cubic_spline_list, "level")
linear_rhi = xr.concat(linear_rhi_list, "level")

```

## 10.5.2 Visualize residuals

- Linear interpolation in q (“linear-q”) shows a clear bias in the residuals. This is the same bias previously discussed arising from the “concave up” lapse rate.
- Linear interpolation in the RHi grid (“linear-rhi”) shows some bias as well. In particular, the residual mean is further from zero than the other methods.
- Interpolation in the log-log domain (“log-q-log-p”) and the cubic spline method (“cubic-spline”) both appear promising.

```
[14]: fig, ((ax1, ax2), (ax3, ax4)) = plt.subplots(figsize=(8, 6), ncols=2, nrows=2)
```

```

bins = np.linspace(-0.4, 0.4, 100)
cond = (rhi_true > 0.9) & (rhi_true < 1.3)

ax1.hist((rhi_true - linear_q).values[cond], bins=bins)
ax2.hist((rhi_true - log_q_log_p).values[cond], bins=bins)
ax3.hist((rhi_true - cubic_spline).values[cond], bins=bins)
ax4.hist((rhi_true - linear_rhi).values[cond], bins=bins)

ax1.set_xlabel("reanalysis $-$ linear-q interp")
ax2.set_xlabel("reanalysis $-$ log-q-log-p interp")
ax3.set_xlabel("reanalysis $-$ cubic-spline interp")
ax4.set_xlabel("reanalysis $-$ linear-rhi interp")

```

(continues on next page)

(continued from previous page)

```

ax1.set_ylim(0, 80000)
ax2.set_ylim(0, 80000)
ax3.set_ylim(0, 80000)
ax4.set_ylim(0, 80000)

plt.tight_layout()
fig.suptitle("RHi residuals distribution near ISSR threshold", y=1.02);

```

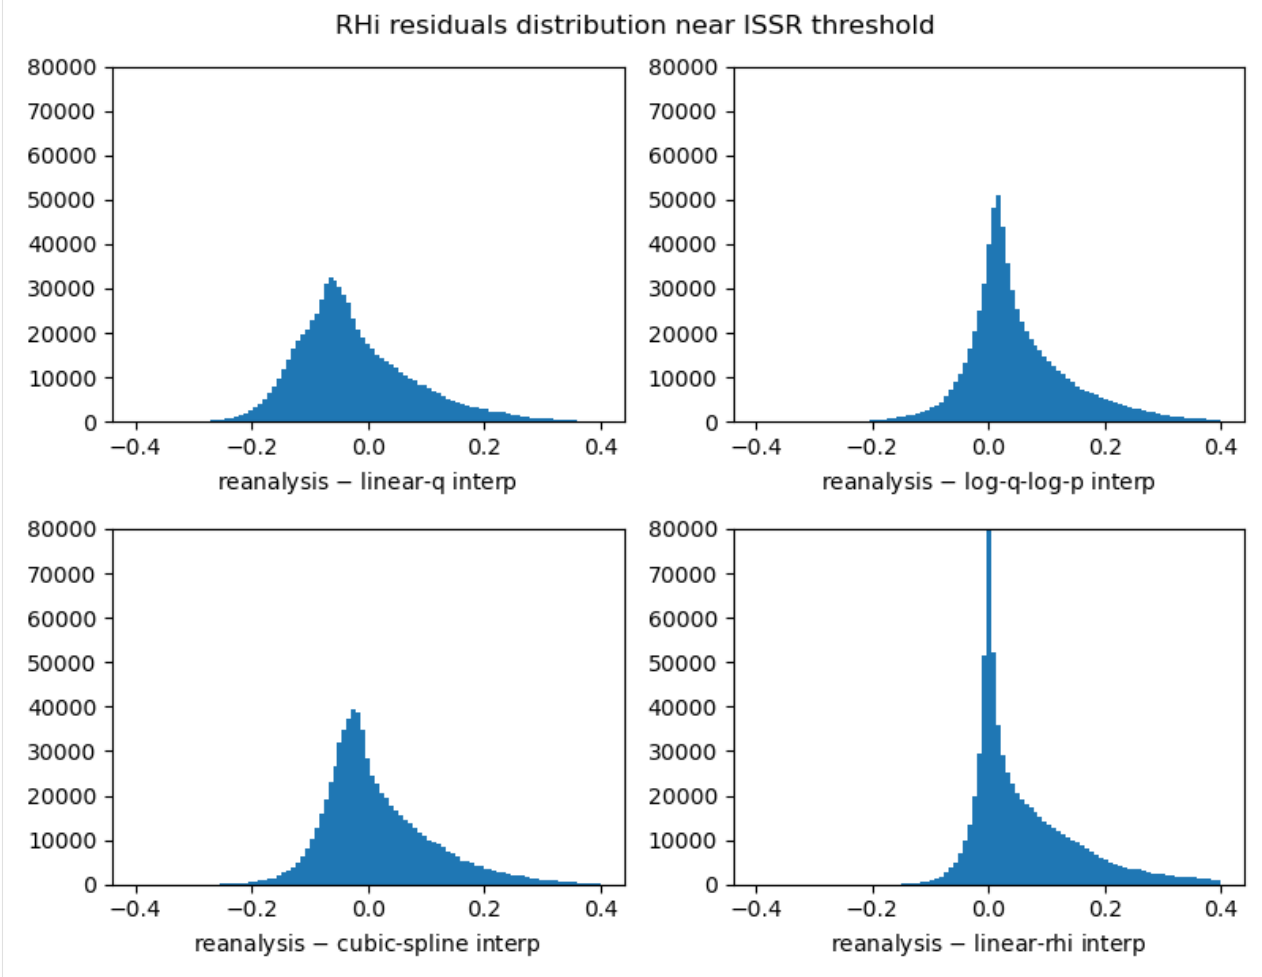

```

[15]: fig, ax = plt.subplots(figsize=(8, 6))

clip = -0.3, 0.3

sns.kdeplot((rhi_true - linear_q).values[cond], clip=clip, ax=ax, label="linear-q")
sns.kdeplot((rhi_true - log_q_log_p).values[cond], clip=clip, ax=ax, label="log-q-log-p")
sns.kdeplot((rhi_true - cubic_spline).values[cond], clip=clip, ax=ax, label="cubic-spline
↪")
sns.kdeplot((rhi_true - linear_rhi).values[cond], clip=clip, ax=ax, label="linear-rhi")

ax.axvline((rhi_true - linear_q).values[cond].mean(), color="C0", linestyle="--",
↪alpha=0.5)

```

(continues on next page)

(continued from previous page)

```

ax.axvline((rhi_true - log_q_log_p).values[cond].mean(), color="C1", linestyle="--",
↪alpha=0.5)
ax.axvline((rhi_true - cubic_spline).values[cond].mean(), color="C2", linestyle="--",
↪alpha=0.5)
ax.axvline((rhi_true - linear_rhi).values[cond].mean(), color="C3", linestyle="--",
↪alpha=0.5)

ax.set_title("RHi residuals distribution near ISSR threshold")
ax.set_xlabel("reanalysis $$ interp")
ax.legend();

```

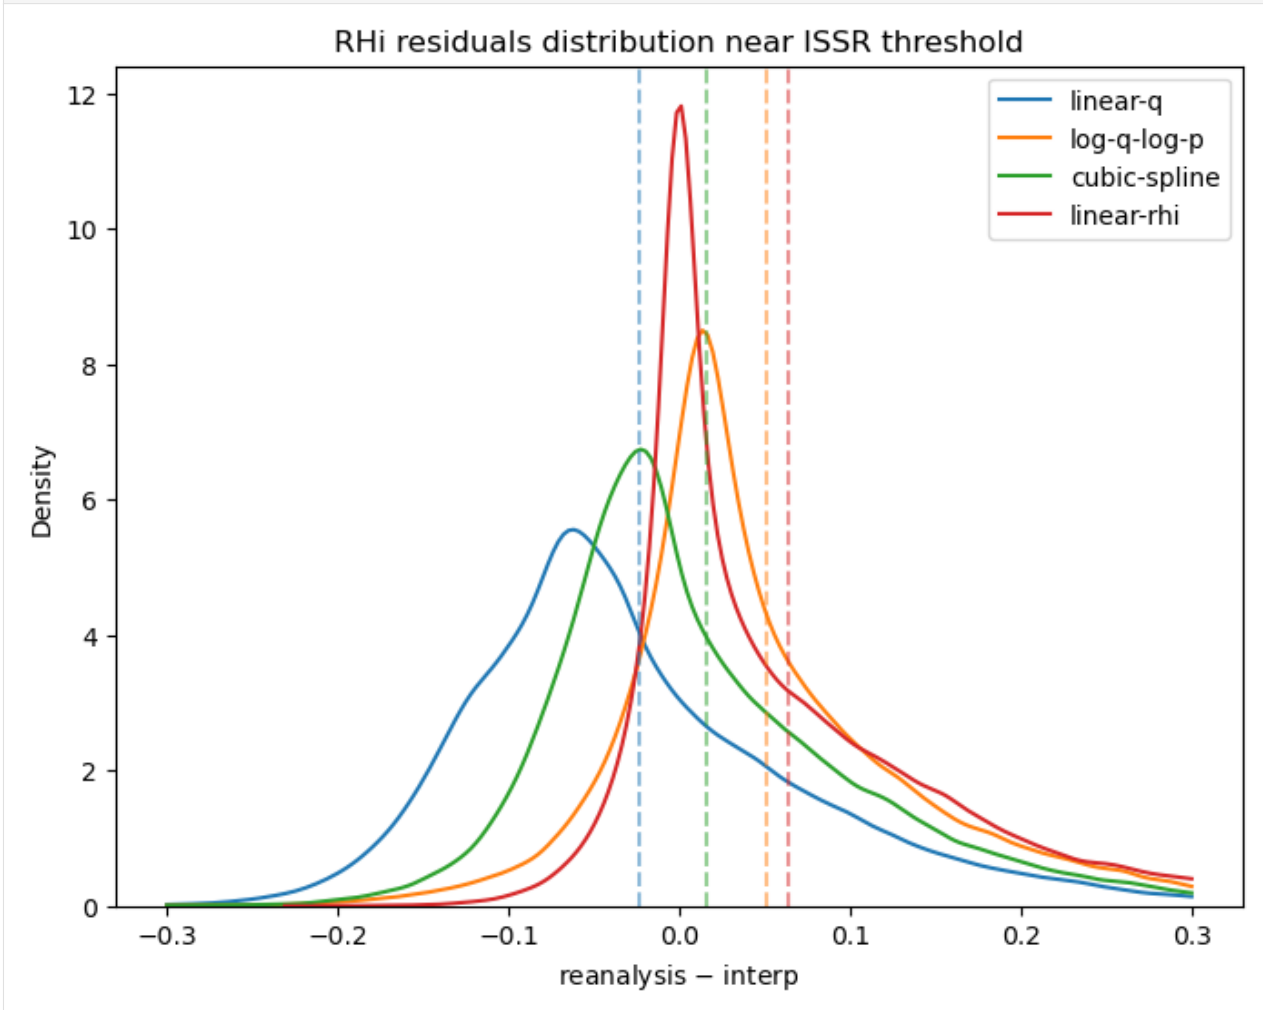

### 10.5.3 Print error metrics

```
[16]: print(f"MSE linear-q near ISSR:      {np.mean((rhi_true - linear_q).values[cond] ** 2):.
      ↪.4f}")
      print(f"MSE log-q-log-p near ISSR: {np.mean((rhi_true - log_q_log_p).values[cond] ** 2):
      ↪.4f}")
      print(f"MSE cubic-spline near ISSR: {np.mean((rhi_true - cubic_spline).values[cond] ** 2):
      ↪.4f}")
      print(f"MSE linear-rhi near ISSR:  {np.mean((rhi_true - linear_rhi).values[cond] ** 2):.
      ↪.4f}")
      print("----")
      print(f"MAE linear-q near ISSR:      {np.mean(np.abs(rhi_true - linear_q).values[cond]):.
      ↪.4f}")
      print(f"MAE log-q-log-p near ISSR:  {np.mean(np.abs(rhi_true - log_q_log_p).
      ↪values[cond]):.4f}")
      print(f"MAE cubic-spline near ISSR: {np.mean(np.abs(rhi_true - cubic_spline).
      ↪values[cond]):.4f}")
      print(f"MAE linear-rhi near ISSR:  {np.mean(np.abs(rhi_true - linear_rhi).values[cond]):
      ↪.4f}")
```

```
MSE linear-q near ISSR:      0.0112
MSE log-q-log-p near ISSR:  0.0110
MSE cubic-spline near ISSR: 0.0092
MSE linear-rhi near ISSR:   0.0138
----
MAE linear-q near ISSR:      0.0848
MAE log-q-log-p near ISSR:  0.0722
MAE cubic-spline near ISSR: 0.0697
MAE linear-rhi near ISSR:   0.0753
```

## 10.6 Conclusions

- When working with gridded met data, use a finer vertical resolution if possible. Using pressure levels spaced at 10 hPa or less at cruising altitudes is recommended for running CoCiP with high precision.
- Linear interpolation in specific humidity appears to introduce bias when working with gridded met data having coarse pressure levels. This bias can be reduced by using more pressure levels.
- Interpolating in the log-log domain appears to be a good solution. An experimental implementation of this is available in `pycontrails` by setting the model parameter `interpolation_q_method="log-q-log-p"`.
- Interpolating with a monotonic cubic spline transformation of the lapse rate also appears to be a good solution. Similarly, this is experimentally available in `pycontrails` by setting a model parameter `interpolation_q_method="cubic-spline"`.
- Interpolating in the gridded RHi space is another possible solution, but it also introduces bias. This is not directly available in `pycontrails`, but could be implemented by the user.

## 11.1 Data

### 11.1.1 Meteorology

|                                                    |                                                 |
|----------------------------------------------------|-------------------------------------------------|
| <code>MetDataset(data[, cachestore, ...])</code>   | Meteorological dataset with multiple variables. |
| <code>MetdataArray(data[, cachestore, ...])</code> | Meteorological DataArray of single variable.    |

---

#### `pycontrails.MetDataset`

**class** `pycontrails.MetDataset`(*data*, *cachestore=None*, *wrap\_longitude=False*, *copy=True*, *attrs=None*,  
*\*\*attrs\_kwargs*)

Bases: `MetBase`

Meteorological dataset with multiple variables.

Composition around `xr.Dataset` to enforce certain variables and dimensions for internal usage

#### Parameters

- **data** (`xarray.Dataset`) – `xarray.Dataset` containing meteorological variables and coordinates
- **cachestore** (`CacheStore`, *optional*) – Cache datastore for staging intermediates with `save()`. Defaults to `None`.
- **wrap\_longitude** (`bool`, *optional*) – Wrap data along the longitude dimension. If `True`, duplicate and shift longitude values (ie, `-180 -> 180`) to ensure that the longitude dimension covers the entire interval `[-180, 180]`. Defaults to `False`.
- **copy** (`bool`, *optional*) – Copy data on construction. Defaults to `True`.
- **attrs** (`dict[str, Any]`, *optional*) – Attributes to add to `data.attrs`. Defaults to `None`. Generally, `pycontrails.Models` may use the following attributes:
  - **provider**: Name of the data provider (e.g. “ECMWF”).
  - **dataset**: Name of the dataset (e.g. “ERA5”).
  - **product**: Name of the product type (e.g. “reanalysis”).
- **\*\*attrs\_kwargs** (`Any`) – Keyword arguments to add to `data.attrs`. Defaults to `None`.

## Examples

```
>>> import numpy as np
>>> import pandas as pd
>>> import xarray as xr
>>> from pycontrails.datalib.ecmwf import ERA5
```

```
>>> time = ("2022-03-01T00", "2022-03-01T02")
>>> variables = ["air_temperature", "specific_humidity"]
>>> pressure_levels = [200, 250, 300]
>>> era5 = ERA5(time, variables, pressure_levels)
```

```
>>> # Open directly as `MetDataset`
>>> met = era5.open_metdataset()
>>> # Use `data` attribute to access `xarray` object
>>> assert isinstance(met.data, xr.Dataset)
```

```
>>> # Alternatively, open with `xarray` and cast to `MetDataset`
>>> ds = xr.open_mfdataset(era5._cachepaths)
>>> met = MetDataset(ds)
```

```
>>> # Access sub-`DataArrays`
>>> mda = met["t"] # `MetDataArray` instance, needed for interpolation operations
>>> da = mda.data # Underlying `xarray` object
```

```
>>> # Check out a few values
>>> da[5:8, 5:8, 1, 1].values
array([[224.08959005, 224.41374427, 224.75945349],
       [224.09456429, 224.42037658, 224.76525676],
       [224.10036756, 224.42617985, 224.77106004]])
```

```
>>> # Mean temperature over entire array
>>> da.mean().load().item()
223.5083
```

```
__init__(data, cachestore=None, wrap_longitude=False, copy=True, attrs=None, **attrs_kwargs)
```

## Methods

|                                                                |                                                                                           |
|----------------------------------------------------------------|-------------------------------------------------------------------------------------------|
| <code>__init__(data[, cachestore, wrap_longitude, ...])</code> |                                                                                           |
| <code>broadcast_coords(name)</code>                            | Broadcast coordinates along other dimensions.                                             |
| <code>copy()</code>                                            | Create a copy of the current class.                                                       |
| <code>downselect(bbox)</code>                                  | Downselect met data within spatial bounding box.                                          |
| <code>downselect_met(met, *[, longitude_buffer, ...])</code>   | Downselect met to encompass a spatiotemporal region of the data.                          |
| <code>ensure_vars(vars[, raise_error])</code>                  | Ensure variables exist in <code>xr.Dataset</code> .                                       |
| <code>from_coords(longitude, latitude, level, time)</code>     | Create a <code>MetDataset</code> containing a coordinate skeleton from coordinate arrays. |
| <code>from_zarr(store, **kwargs)</code>                        | Create a <code>MetDataset</code> from a path to a Zarr store.                             |
| <code>get(key[, default_value])</code>                         | Shortcut to <code>data.get(k, v)()</code> method.                                         |
| <code>load(hash[, cachestore, chunks])</code>                  | Load saved intermediate from cachestore.                                                  |
| <code>save(**kwargs)</code>                                    | Save intermediate to cachestore as netcdf.                                                |
| <code>standardize_variables(variables)</code>                  | Standardize variables <b>in-place</b> .                                                   |
| <code>to_vector([transfer_attrs])</code>                       | Convert a <code>MetDataset</code> to a <code>GeoVectorDataset</code> by raveling data.    |
| <code>update([other])</code>                                   | Shortcut to <code>data.update()</code> .                                                  |
| <code>wrap_longitude()</code>                                  | Wrap longitude coordinates.                                                               |

## Attributes

|                              |                                                                                         |
|------------------------------|-----------------------------------------------------------------------------------------|
| <code>attrs</code>           | Pass through to <code>self.data.attrs</code> .                                          |
| <code>coords</code>          | Get coordinates of underlying <code>data</code> coordinates.                            |
| <code>dataset_attr</code>    | Look up the 'dataset' attribute with a custom error message.                            |
| <code>dim_order</code>       | Default dimension order for <code>DataArray</code> or <code>Dataset</code> (x, y, z, t) |
| <code>hash</code>            | Generate a unique hash for this met instance.                                           |
| <code>indexes</code>         | Low level access to underlying <code>data</code> indexes.                               |
| <code>is_single_level</code> | Check if instance contains "single level" or "surface level" data.                      |
| <code>is_wrapped</code>      | Check if the longitude dimension covers the closed interval <code>[-180, 180]</code> .  |
| <code>is_zarr</code>         | Check if underlying <code>data</code> is sourced from a Zarr group.                     |
| <code>product_attr</code>    | Look up the 'product' attribute with a custom error message.                            |
| <code>provider_attr</code>   | Look up the 'provider' attribute with a custom error message.                           |
| <code>shape</code>           | Return the shape of the dimensions.                                                     |
| <code>size</code>            | Return the size of (each) array in underlying <code>data</code> .                       |
| <code>variables</code>       | See <code>indexes</code> .                                                              |
| <code>data</code>            | <code>DataArray</code> or <code>Dataset</code>                                          |
| <code>cachestore</code>      | Cache datastore to use for <code>save()</code> or <code>load()</code>                   |

### `broadcast_coords(name)`

Broadcast coordinates along other dimensions.

**Parameters**

**name** (*str*) – Coordinate/dimension name to broadcast. Can be a dimension or non-dimension coordinates.

**Returns**

`xarray.DataArray` – DataArray of the coordinate broadcasted along all other dimensions. The DataArray will have the same shape as the gridded data.

**copy()**

Create a copy of the current class.

**Returns**

`MetDataset` – MetDataset copy

**data**

DataArray or Dataset

**property dataset\_attr**

Look up the ‘dataset’ attribute with a custom error message.

**Returns**

*str* – Dataset of the data. If not one of ‘ERA5’, ‘HRES’, ‘IFS’, or ‘GFS’, a warning is issued.

**downselect(bbox)**

Downselect met data within spatial bounding box.

**Parameters**

**bbox** (*list[float]*) – List of coordinates defining a spatial bounding box in WGS84 coordinates. For 2D queries, list is [west, south, east, north]. For 3D queries, list is [west, south, min-level, east, north, max-level] with level defined in [*hPa*].

**Returns**

`MetBase` – Return downselected data

**ensure\_vars(vars, raise\_error=True)**

Ensure variables exist in `xr.Dataset`.

**Parameters**

- **vars** (*MetVariable | str | Sequence[MetVariable | str | list[MetVariable]]*) – List of `MetVariable` (or string key), or individual `MetVariable` (or string key). If `vars` contains an element with a `list[MetVariable]`, then only one variable in the list must be present in dataset.
- **raise\_error** (*bool, optional*) – Raise `KeyError` if data does not contain variables. Defaults to `True`.

**Returns**

*list[str]* – List of met keys verified in `MetDataset`. Returns an empty list if any `MetVariable` is missing.

**Raises**

`KeyError` – Raises when dataset does not contain variable in `vars`

**classmethod from\_coords(longitude, latitude, level, time)**

Create a `MetDataset` containing a coordinate skeleton from coordinate arrays.

**Parameters**

- **longitude, latitude** (*npt.ArrayLike | float*) – Horizontal coordinates, in [deg]
- **level** (*npt.ArrayLike | float*) – Vertical coordinate, in [*hPa*]



- **time** (`npt.ArrayLike` | `np.datetime64`,) – Temporal coordinates, in *[UTC]*. Will be sorted.

### Returns

*MetDataset* – MetDataset with no variables.

### Examples

```
>>> # Create skeleton MetDataset
>>> longitude = np.arange(0, 10, 0.5)
>>> latitude = np.arange(0, 10, 0.5)
>>> level = [250, 300]
>>> time = np.datetime64("2019-01-01")
>>> met = MetDataset.from_coords(longitude, latitude, level, time)
>>> met
MetDataset with data:
<xarray.Dataset> Size: 360B
Dimensions:      (longitude: 20, latitude: 20, level: 2, time: 1)
Coordinates:
  * longitude      (longitude) float64 160B 0.0 0.5 1.0 1.5 ... 8.0 8.5 9.0 9.5
  * latitude      (latitude) float64 160B 0.0 0.5 1.0 1.5 ... 8.0 8.5 9.0 9.5
  * level         (level) float64 16B 250.0 300.0
  * time          (time) datetime64[ns] 8B 2019-01-01
  air_pressure   (level) float32 8B 2.5e+04 3e+04
  altitude       (level) float32 8B 1.036e+04 9.164e+03
Data variables:
  *empty*
```

```
>>> met.shape
(20, 20, 2, 1)
```

```
>>> met.size
800
```

```
>>> # Fill it up with some constant data
>>> met["temperature"] = xr.DataArray(np.full(met.shape, 234.5), coords=met.
↳ coords)
>>> met["humidity"] = xr.DataArray(np.full(met.shape, 0.5), coords=met.coords)
>>> met
MetDataset with data:
<xarray.Dataset> Size: 13kB
Dimensions:      (longitude: 20, latitude: 20, level: 2, time: 1)
Coordinates:
  * longitude      (longitude) float64 160B 0.0 0.5 1.0 1.5 ... 8.0 8.5 9.0 9.5
  * latitude      (latitude) float64 160B 0.0 0.5 1.0 1.5 ... 8.0 8.5 9.0 9.5
  * level         (level) float64 16B 250.0 300.0
  * time          (time) datetime64[ns] 8B 2019-01-01
  air_pressure   (level) float32 8B 2.5e+04 3e+04
  altitude       (level) float32 8B 1.036e+04 9.164e+03
Data variables:
  temperature    (longitude, latitude, level, time) float64 6kB 234.5 ... 234.5
  humidity       (longitude, latitude, level, time) float64 6kB 0.5 0.5 ... 0.5
```

```

>>> # Convert to a GeoVectorDataset
>>> vector = met.to_vector()
>>> vector.dataframe.head()
longitude  latitude  level      time  temperature  humidity
0          0.0      0.0  250.0  2019-01-01      234.5      0.5
1          0.0      0.0  300.0  2019-01-01      234.5      0.5
2          0.0      0.5  250.0  2019-01-01      234.5      0.5
3          0.0      0.5  300.0  2019-01-01      234.5      0.5
4          0.0      1.0  250.0  2019-01-01      234.5      0.5

```

**classmethod** `from_zarr`(*store*, *\*\*kwargs*)

Create a *MetDataset* from a path to a Zarr store.

**Parameters**

- **store** (Any) – Path to Zarr store. Passed into `xarray.open_zarr()`.
- **\*\*kwargs** (Any) – Other keyword only arguments passed into `xarray.open_zarr()`.

**Returns**

*MetDataset* – MetDataset with data from Zarr store.

**get**(*key*, *default\_value=None*)

Shortcut to `data.get(k, v)` method.

**Parameters**

- **key** (str) – Key to get from *data*
- **default\_value** (Any, optional) – Return *default\_value* if *key* not in *data*, by default *None*

**Returns**

Any – Values returned from `data.get(key, default_value)`

**classmethod** `load`(*hash*, *cachestore=None*, *chunks=None*)

Load saved intermediate from *cachestore*.

**Parameters**

- **hash** (str) – Saved hash to load.
- **cachestore** (CacheStore, optional) – Cache datastore to use for sourcing files. Defaults to `DiskCacheStore`.
- **chunks** (dict[str: int], optional) – Chunks kwarg passed to `xarray.open_mfdataset()` when opening files.

**Returns**

*MetDataset* – New `MetDataArray` with loaded data.

**property** `product_attr`

Look up the ‘product’ attribute with a custom error message.

**Returns**

str – Product of the data. If not one of ‘forecast’, ‘ensemble’, or ‘reanalysis’, a warning is issued.

**property** `provider_attr`

Look up the ‘provider’ attribute with a custom error message.

**Returns**

str – Provider of the data. If not one of ‘ECMWF’ or ‘NCEP’, a warning is issued.

**save**(\*\*kwargs)

Save intermediate to cachestore as netcdf.

Load and restore using [load\(\)](#).

**Parameters**

\*\*kwargs (Any) – Keyword arguments passed directly to `xarray.Dataset.to_netcdf()`

**Returns**

list[str] – Returns filenames saved

**property shape**

Return the shape of the dimensions.

**Returns**

tuple[int, int, int, int] – Shape of underlying data

**property size**

Return the size of (each) array in underlying *data*.

**Returns**

int – Total number of grid points in underlying data

**standardize\_variables**(variables)

Standardize variables **in-place**.

**Parameters**

variables (Iterable[MetVariable]) – Data source variables

**See also:**

[standardize\\_variables\(\)](#)

**to\_vector**(transfer\_attrs=True)

Convert a *MetDataset* to a *GeoVectorDataset* by raveling data.

If *data* is lazy, it will be loaded.

**Parameters**

transfer\_attrs (bool, optional) – Transfer attributes from *data* to output *GeoVectorDataset*. By default, True, meaning that attributes are transferred.

**Returns**

*GeoVectorDataset* – Converted *GeoVectorDataset*. The variables on the returned instance include all of those on the input instance, plus the four core spatial temporal variables.

## Examples

```
>>> from pycontrails.datalib.ecmwf import ERA5
>>> times = "2022-03-01", "2022-03-01T01"
>>> variables = ["air_temperature", "specific_humidity"]
>>> levels = [250, 200]
>>> era5 = ERA5(time=times, variables=variables, pressure_levels=levels)
>>> met = era5.open_metdataset()
>>> met.to_vector(transfer_attrs=False)
GeoVectorDataset [6 keys x 4152960 length, 1 attributes]
  Keys: longitude, latitude, level, time, air_temperature, ..., specific_
  ↳ humidity
```

(continues on next page)

(continued from previous page)

```

Attributes:
time          [2022-03-01 00:00:00, 2022-03-01 01:00:00]
longitude     [-180.0, 179.75]
latitude      [-90.0, 90.0]
altitude      [10362.8, 11783.9]
crs           EPSG:4326

```

**update**(*other=None*, *\*\*kwargs*)

Shortcut to `data.update()`.

See `xarray.Dataset.update()` for reference.

#### Parameters

- **other** (*MutableMapping*) – Variables with which to update this dataset
- **\*\*kwargs** (*Any*) – Variables defined by keyword arguments. If a variable exists both in **other** and as a keyword argument, the keyword argument takes precedence.

**See also:**

-

meth:`xarray.Dataset.update`

**wrap\_longitude**()

Wrap longitude coordinates.

#### Returns

*MetDataset* – Copy of *MetDataset* with wrapped longitude values. Returns copy of current *MetDataset* when longitude values are already wrapped

## pycontrails.MetdataArray

**class** `pycontrails.MetdataArray`(*data*, *cachestore=None*, *wrap\_longitude=False*, *copy=True*, *validate=True*, *name=None*, *\*\*kwargs*)

Bases: *MetBase*

Meteorological DataArray of single variable.

Wrapper around `xr.DataArray` to enforce certain variables and dimensions for internal usage.

#### Parameters

- **data** (*ArrayLike*) – `xr.DataArray` or other array-like data source. When array-like input is provided, input **\*\*kwargs** passed directly to `xr.DataArray` constructor.
- **cachestore** (*CacheStore*, *optional*) – Cache datastore for staging intermediates with `save()`. Defaults to `DiskCacheStore`.
- **wrap\_longitude** (*bool*, *optional*) – Wrap data along the longitude dimension. If `True`, duplicate and shift longitude values (ie, -180 -> 180) to ensure that the longitude dimension covers the entire interval `[-180, 180]`. Defaults to `False`.
- **copy** (*bool*, *optional*) – Copy *data* parameter on construction, by default `True`. If *data* is lazy-loaded via *dask*, this parameter has no effect. If *data* is already loaded into memory, a copy of the data (rather than a view) may be created if `True`.

- **validate** (*bool, optional*) – Confirm that the parameter *data* has correct specification. This automatically handled in the case that *copy=True*. Validation only introduces a very small overhead. This parameter should only be set to *False* if working with data derived from an existing `MetDataset` or `:class`MetDataArray``. By default *True*.
- **name** (*Hashable, optional*) – Name of the data variable. If not specified, the name will be set to “met”.
- **\*\*kwargs** – To be removed in future versions. Passed directly to `xr.DataArray` constructor.

## Examples

```
>>> import numpy as np
>>> import xarray as xr
>>> rng = np.random.default_rng(seed=456)
```

```
>>> # Cook up random xarray object
>>> coords = {
...     "longitude": np.arange(-20, 20),
...     "latitude": np.arange(-30, 30),
...     "level": [220, 240, 260, 280],
...     "time": [np.datetime64("2021-08-01T12", "ns"), np.datetime64("2021-08-01T16
↪", "ns")]
...     }
>>> da = xr.DataArray(rng.random((40, 60, 4, 2)), dims=coords.keys(), coords=coords)
```

```
>>> # Cast to `MetDataArray` in order to interpolate
>>> from pycontrails import MetDataArray
>>> mda = MetDataArray(da)
>>> mda.interpolate(-11.4, 5.7, 234, np.datetime64("2021-08-01T13"))
array([0.52358215])
```

```
>>> mda.interpolate(-11.4, 5.7, 234, np.datetime64("2021-08-01T13"), method='nearest
↪')
array([0.4188465])
```

```
>>> da.sel(longitude=-11, latitude=6, level=240, time=np.datetime64("2021-08-01T12
↪")).item()
0.41884649899766946
```

```
__init__(data, cachelstore=None, wrap_longitude=False, copy=True, validate=True, name=None,
         **kwargs)
```

## Methods

|                                                                |                                                                                           |
|----------------------------------------------------------------|-------------------------------------------------------------------------------------------|
| <code>__init__(data[, cachestore, wrap_longitude, ...])</code> |                                                                                           |
| <code>broadcast_coords(name)</code>                            | Broadcast coordinates along other dimensions.                                             |
| <code>copy()</code>                                            | Create a copy of the current class.                                                       |
| <code>downselect(bbox)</code>                                  | Downselect met data within spatial bounding box.                                          |
| <code>downselect_met(met, *[, longitude_buffer, ...])</code>   | Downselect met to encompass a spatiotemporal region of the data.                          |
| <code>find_edges()</code>                                      | Find edges of regions.                                                                    |
| <code>interpolate(longitude, latitude, level, time, *)</code>  | Interpolate values over underlying DataArray.                                             |
| <code>load(hash[, cachestore, chunks])</code>                  | Load saved intermediate from cachestore.                                                  |
| <code>save(**kwargs)</code>                                    | Save intermediate to cachestore as netcdf.                                                |
| <code>to_polygon_feature([level, time, ...])</code>            | Create GeoJSON Feature artifact from spatial array on a single level and time slice.      |
| <code>to_polygon_feature_collection([time, ...])</code>        | Create GeoJSON FeatureCollection artifact from spatial array at time slice.               |
| <code>to_polyhedra(*[, time, iso_value, ...])</code>           | Create a collection of polyhedra from spatial array corresponding to a single time slice. |
| <code>wrap_longitude()</code>                                  | Wrap longitude coordinates.                                                               |

## Attributes

|                              |                                                                                        |
|------------------------------|----------------------------------------------------------------------------------------|
| <code>attrs</code>           | Pass through to <code>self.data.attrs</code> .                                         |
| <code>binary</code>          | Determine if all data is a binary value (0, 1).                                        |
| <code>coords</code>          | Get coordinates of underlying <code>data</code> coordinates.                           |
| <code>dim_order</code>       | Default dimension order for DataArray or Dataset (x, y, z, t)                          |
| <code>hash</code>            | Generate a unique hash for this met instance.                                          |
| <code>in_memory</code>       | Check if underlying <code>data</code> is loaded into memory.                           |
| <code>indexes</code>         | Low level access to underlying <code>data</code> indexes.                              |
| <code>is_single_level</code> | Check if instance contains "single level" or "surface level" data.                     |
| <code>is_wrapped</code>      | Check if the longitude dimension covers the closed interval <code>[-180, 180]</code> . |
| <code>is_zarr</code>         | Check if underlying <code>data</code> is sourced from a Zarr group.                    |
| <code>name</code>            | Return the DataArray name.                                                             |
| <code>proportion</code>      | Compute proportion of points with value 1.                                             |
| <code>shape</code>           | Return the shape of the dimensions.                                                    |
| <code>size</code>            | Return the size of (each) array in underlying <code>data</code> .                      |
| <code>values</code>          | Return underlying numpy array.                                                         |
| <code>variables</code>       | See <code>indexes</code> .                                                             |
| <code>data</code>            | DataArray or Dataset                                                                   |
| <code>cachestore</code>      | Cache datastore to use for <code>save()</code> or <code>load()</code>                  |

### property `binary`

Determine if all data is a binary value (0, 1).

#### Returns

`bool` – True if all data values are binary value (0, 1)

**broadcast\_coords**(*name*)

Broadcast coordinates along other dimensions.

**Parameters**

**name** (*str*) – Coordinate/dimension name to broadcast. Can be a dimension or non-dimension coordinates.

**Returns**

*xarray.DataArray* – DataArray of the coordinate broadcasted along all other dimensions. The DataArray will have the same shape as the gridded data.

**copy**()

Create a copy of the current class.

**Returns**

*MetDataArray* – MetDataArray copy

**data**

DataArray or Dataset

**downselect**(*bbox*)

Downselect met data within spatial bounding box.

**Parameters**

**bbox** (*list*[*float*]) – List of coordinates defining a spatial bounding box in WGS84 coordinates. For 2D queries, list is [west, south, east, north]. For 3D queries, list is [west, south, min-level, east, north, max-level] with level defined in [*hPa*].

**Returns**

*MetBase* – Return downselected data

**find\_edges**()

Find edges of regions.

**Returns**

*MetDataArray* – MetDataArray with a binary field, 1 on the edge of the regions, 0 outside and inside the regions.

**Raises**

*NotImplementedError* – If the instance is not binary.

**property in\_memory**

Check if underlying *data* is loaded into memory.

This method uses protected attributes of underlying *xarray* objects, and may be subject to deprecation.

Changed in version 0.26.0: Rename from *is\_loaded* to *in\_memory*.

**Returns**

*bool* – If underlying data exists as an *np.ndarray* in memory.

**interpolate**(*longitude, latitude, level, time, \*, method='linear', bounds\_error=False, fill\_value=nan, localize=False, indices=None, return\_indices=False*)

Interpolate values over underlying DataArray.

Zero dimensional coordinates are reshaped to 1D arrays.

Method automatically loads underlying *data* into memory.

If method == "nearest", the out array will have the same dtype as the underlying *data*.

If method == "linear", the out array will be promoted to the most precise dtype of:

- underlying *data*
- `data.longitude`
- `data.latitude`
- `data.level`
- `longitude`
- `latitude`

New in version 0.24: This method can now handle singleton dimensions with `method == "linear"`. Previously these degenerate dimensions caused nan values to be returned.

#### Parameters

- **longitude** (`float` | `npt.NDArray[np.float64]`) – Longitude values to interpolate. Assumed to be 0 or 1 dimensional.
- **latitude** (`float` | `npt.NDArray[np.float64]`) – Latitude values to interpolate. Assumed to be 0 or 1 dimensional.
- **level** (`float` | `npt.NDArray[np.float64]`) – Level values to interpolate. Assumed to be 0 or 1 dimensional.
- **time** (`np.datetime64` | `npt.NDArray[np.datetime64]`) – Time values to interpolate. Assumed to be 0 or 1 dimensional.
- **method** (`str`, *optional*) – Additional keyword arguments to pass to `scipy.interpolate.RegularGridInterpolator`. Defaults to “linear”.
- **bounds\_error** (`bool`, *optional*) – Additional keyword arguments to pass to `scipy.interpolate.RegularGridInterpolator`. Defaults to `False`.
- **fill\_value** (`float` | `np.float64`, *optional*) – Additional keyword arguments to pass to `scipy.interpolate.RegularGridInterpolator`. Set to `None` to extrapolate outside the boundary when `method` is `nearest`. Defaults to `np.nan`.
- **localize** (`bool`, *optional*) – Experimental. If `True`, downselect gridded data to smallest bounding box containing all points. By default `False`.
- **indices** (`tuple` | `None`, *optional*) – Experimental. See `interpolation.interp()`. `None` by default.
- **return\_indices** (`bool`, *optional*) – Experimental. See `interpolation.interp()`. `False` by default.

#### Returns

`numpy.ndarray` – Interpolated values

#### See also:

`GeoVectorDataset.intersect_met()`



## Examples

```
>>> from datetime import datetime
>>> import numpy as np
>>> import pandas as pd
>>> from pycontrails.datalib.ecmwf import ERA5
```

```
>>> times = (datetime(2022, 3, 1, 12), datetime(2022, 3, 1, 15))
>>> variables = "air_temperature"
>>> levels = [200, 250, 300]
>>> era5 = ERA5(times, variables, levels)
>>> met = era5.open_metdataset()
>>> mda = met["air_temperature"]
```

```
>>> # Interpolation at a grid point agrees with value
>>> mda.interpolate(1, 2, 300, np.datetime64('2022-03-01T14:00'))
array([241.91972984])
```

```
>>> da = mda.data
>>> da.sel(longitude=1, latitude=2, level=300, time=np.datetime64('2022-03-01T14
↪')).item()
241.9197298421629
```

```
>>> # Interpolation off grid
>>> mda.interpolate(1.1, 2.1, 290, np.datetime64('2022-03-01 13:10'))
array([239.83793798])
```

```
>>> # Interpolate along path
>>> longitude = np.linspace(1, 2, 10)
>>> latitude = np.linspace(2, 3, 10)
>>> level = np.linspace(200, 300, 10)
>>> time = pd.date_range("2022-03-01T14", periods=10, freq="5min")
>>> mda.interpolate(longitude, latitude, level, time)
array([[220.44347694, 223.08900738, 225.74338924, 228.41642088,
        231.10858599, 233.54857391, 235.71504913, 237.86478872,
        239.99274623, 242.10792167]])
```

**classmethod** `load(hash, cachestore=None, chunks=None)`

Load saved intermediate from cachestore.

### Parameters

- **hash** (`str`) – Saved hash to load.
- **cachestore** (`CacheStore`, *optional*) – Cache datastore to use for sourcing files. Defaults to `DiskCacheStore`.
- **chunks** (`dict[str, int]`, *optional*) – Chunks kwarg passed to `xarray.open_mfdataset()` when opening files.

### Returns

`MetdataArray` – New `MetdataArray` with loaded data.

### property name

Return the `DataArray` name.

**Returns**

Hashable – DataArray name

**property proportion**

Compute proportion of points with value 1.

**Returns**

float – Proportion of points with value 1

**Raises**

**NotImplementedError** – If instance does not contain binary data.

**save(\*\*kwargs)**

Save intermediate to cachestore as netcdf.

Load and restore using `load()`.

**Parameters**

**\*\*kwargs** (Any) – Keyword arguments passed directly to `xarray.save_mfdataset()`

**Returns**

list[str] – Returns filenames of saved files

**property shape**

Return the shape of the dimensions.

**Returns**

tuple[int, int, int, int] – Shape of underlying data

**property size**

Return the size of (each) array in underlying `data`.

**Returns**

int – Total number of grid points in underlying data

**to\_polygon\_feature**(*level=None, time=None, fill\_value=nan, iso\_value=None, min\_area=0.0, epsilon=0.0, lower\_bound=True, precision=None, interiors=True, convex\_hull=False, include\_altitude=False, properties=None*)

Create GeoJSON Feature artifact from spatial array on a single level and time slice.

Computed polygons always contain an exterior linear ring as defined by the *GeoJSON Polygon specification* <<https://www.rfc-editor.org/rfc/rfc7946.html#section-3.1.6>>. Polygons may also contain interior linear rings (holes). This method does not support nesting beyond the GeoJSON specification. See the [pycontrails.core.polygon](#) for additional polygon support.

Changed in version 0.25.12: Previous implementation include several additional parameters which have been removed:

- The `approximate` parameter
- An `path` parameter to save output as JSON
- Passing arbitrary kwargs to `skimage.measure.find_contours()`.

New implementation includes new parameters previously lacking:

- `fill_value`
- `min_area`
- `include_altitude`

Changed in version 0.38.0: Change default value of `epsilon` from 0.15 to 0.

Changed in version 0.41.0: Convert continuous fields to binary fields before computing polygons. The parameters `max_area` and `epsilon` are now expressed in terms of longitude/latitude units instead of pixels.

### Parameters

- **level** (`float`, *optional*) – Level slice to create polygons. If the “level” coordinate is length 1, then the single level slice will be selected automatically.
- **time** (`datetime`, *optional*) – Time slice to create polygons. If the “time” coordinate is length 1, then the single time slice will be selected automatically.
- **fill\_value** (`float`, *optional*) – Value used for filling missing data and for padding the underlying data array. Set to `np.nan` by default, which ensures that regions with missing data are never included in polygons.
- **iso\_value** (`float`, *optional*) – Value in field to create iso-surface. Defaults to the average of the min and max value of the array. (This is the same convention as used by `skimage`.)
- **min\_area** (`float`, *optional*) – Minimum area of each polygon. Polygons with area less than `min_area` are not included in the output. The unit of this parameter is in longitude/latitude degrees squared. Set to 0 to omit any polygon filtering based on a minimal area conditional. By default, 0.0.
- **epsilon** (`float`, *optional*) – Control the extent to which the polygon is simplified. A value of 0 does not alter the geometry of the polygon. The unit of this parameter is in longitude/latitude degrees. By default, 0.0.
- **lower\_bound** (`bool`, *optional*) – Whether to use `iso_value` as a lower or upper bound on values in polygon interiors. By default, True.
- **precision** (`int`, *optional*) – Number of decimal places to round coordinates to. If None, no rounding is performed.
- **interiors** (`bool`, *optional*) – If True, include interior linear rings (holes) in the output. True by default.
- **convex\_hull** (`bool`, *optional*) – EXPERIMENTAL. If True, compute the convex hull of each polygon. Only implemented for `depth=1`. False by default. A warning is issued if the underlying algorithm fails to make valid polygons after computing the convex hull.
- **include\_altitude** (`bool`, *optional*) – If True, include the array altitude [*m*] as a z-coordinate in the *GeoJSON output* <<https://www.rfc-editor.org/rfc/rfc7946#section-3.1.1>>. False by default.
- **properties** (`dict`, *optional*) – Additional properties to include in the GeoJSON output. By default, None.

### Returns

`dict[str, Any]` – Python representation of GeoJSON Feature with MultiPolygon geometry.

## Notes

Cocip and CocipGrid set some quantities to 0 and other quantities to `np.nan` in regions where no contrails form. When computing polygons from Cocip or CocipGrid output, take care that the choice of `fill_value` correctly includes or excludes contrail-free regions. See the Cocip documentation for details about `np.nan` in model output.

### See also:

`to_polyhedra()`, `pycontrails.core.polygons.find_multipolygons()`

## Examples

```
>>> from pprint import pprint
>>> from pycontrails.datalib.ecmwf import ERA5
>>> era5 = ERA5("2022-03-01", variables="air_temperature", pressure_levels=250)
>>> mda = era5.open_metdataset()["air_temperature"]
>>> mda.shape
(1440, 721, 1, 1)
```

```
>>> pprint(mda.to_polygon_feature(iso_value=239.5, precision=2, epsilon=0.1))
{'geometry': {'coordinates': [[[167.88, -22.5],
                               [167.75, -22.38],
                               [167.62, -22.5],
                               [167.75, -22.62],
                               [167.88, -22.5]]],
              [[43.38, -33.5],
               [43.5, -34.12],
               [43.62, -33.5],
               [43.5, -33.38],
               [43.38, -33.5]]]},
 'type': 'MultiPolygon'},
 'properties': {},
 'type': 'Feature'}
```

`to_polygon_feature_collection`(*time=None, fill\_value=nan, iso\_value=None, min\_area=0.0, epsilon=0.0, lower\_bound=True, precision=None, interiors=True, convex\_hull=False, include\_altitude=False, properties=None*)

Create GeoJSON FeatureCollection artifact from spatial array at time slice.

See the `to_polygon_feature()` method for a description of the parameters.

### Returns

`dict[str, Any]` – Python representation of GeoJSON FeatureCollection. This dictionary is comprised of individual GeoJSON Features, one per `self.data["level"]`.

`to_polyhedra`(\**, time=None, iso\_value=0.0, simplify\_fraction=1.0, lower\_bound=True, return\_type='geojson', path=None, altitude\_scale=1.0, output\_vertex\_normals=False, closed=True*)

Create a collection of polyhedra from spatial array corresponding to a single time slice.

### Parameters

- **time** (`datetime`, *optional*) – Time slice to create mesh. If the “time” coordinate is length 1, then the single time slice will be selected automatically.

- **iso\_value** (*float, optional*) – Value in field to create iso-surface. Defaults to 0.
- **simplify\_fraction** (*float, optional*) – Apply *open3d simplify\_quadric\_decimation* method to simplify the polyhedra geometry. This parameter must be in the half-open interval (0.0, 1.0]. Defaults to 1.0, corresponding to no reduction.
- **lower\_bound** (*bool, optional*) – Whether to use *iso\_value* as a lower or upper bound on values in polyhedra interiors. By default, True.
- **return\_type** (*str, optional*) – Must be one of “geojson” or “mesh”. Defaults to “geojson”. If “geojson”, this method returns a dictionary representation of a geojson MultiPolygon object whose polygons are polyhedra faces. If “mesh”, this method returns an *open3d TriangleMesh* instance.
- **path** (*str, optional*) – Output geojson or mesh to file. If *return\_type* is “mesh”, see [Open3D File I/O for Mesh](#) for file type options.
- **altitude\_scale** (*float, optional*) – Rescale the altitude dimension of the mesh, [*m*]
- **output\_vertex\_normals** (*bool, optional*) – If path is defined, write out vertex normals. Defaults to False.
- **closed** (*bool, optional*) – If True, pad spatial array along all axes to ensure polyhedra are “closed”. This flag often gives rise to cleaner visualizations. Defaults to True.

**Returns**

dict | :class:`o3d.geometry.TriangleMesh` – Python representation of geojson object or [Open3D Triangle Mesh](#) depending on the *return\_type* parameter.

**Raises**

- **ModuleNotFoundError** – Method requires the *vis* optional dependencies
- **ValueError** – If input parameters are invalid.

**See also:**

`to_polygons()` [skimage.measure.marching\\_cubes](#)

**Notes**

Uses the [scikit-image Marching Cubes](#) algorithm to reconstruct a surface from the point-cloud like arrays.

**property values**

Return underlying numpy array.

This methods loads *data* if it is not already in memory.

**Returns**

`numpy.ndarray` – Underlying numpy array

**See also:**

- `meth:xr.Dataset.load`
- `meth:xr.DataArray.load`

**wrap\_longitude()**

Wrap longitude coordinates.

**Returns**

*MetdataArray* – Copy of MetdataArray with wrapped longitude values. Returns copy of current MetdataArray when longitude values are already wrapped

## 11.1.2 Vector Data

---

|                                                  |                                                             |
|--------------------------------------------------|-------------------------------------------------------------|
| <i>VectorDataset</i> ([data, attrs, copy])       | Base class to hold 1D arrays of consistent size.            |
| <i>GeoVectorDataset</i> ([data, longitude, ...]) | Base class to hold 1D geospatial arrays of consistent size. |

---

### pycontrails.VectorDataset

**class** pycontrails.**VectorDataset**(data=None, \*, attrs=None, copy=True, \*\*attrs\_kwargs)

Bases: `object`

Base class to hold 1D arrays of consistent size.

**Parameters**

- **data** (`dict[str, npt.ArrayLike]` | `pd.DataFrame` | `VectorDataDict` | `VectorDataset` | `None`, *optional*) – Initial data, by default `None`
- **attrs** (`dict[str, Any]` | `AttrDict`, *optional*) – Dictionary of attributes, by default `None`
- **copy** (`bool`, *optional*) – Copy data on class creation, by default `True`
- **\*\*attrs\_kwargs** (`Any`) – Additional attributes passed as keyword arguments

**Raises**

**ValueError** – If “time” variable cannot be converted to numpy array.

**\_\_init\_\_**(data=None, \*, attrs=None, copy=True, \*\*attrs\_kwargs)

## Methods

|                                                                |                                                                                           |
|----------------------------------------------------------------|-------------------------------------------------------------------------------------------|
| <code>__init__([data, attrs, copy])</code>                     |                                                                                           |
| <code>broadcast_attrs(keys[, overwrite, raise_error])</code>   | Attach values from keys in <i>attrs</i> onto <i>data</i> .                                |
| <code>broadcast_numeric_attrs([ignore_keys, overwrite])</code> | Attach numeric values in <i>attrs</i> onto <i>data</i> .                                  |
| <code>copy(**kwargs)</code>                                    | Return a copy of this VectorDatasetType class.                                            |
| <code>create_empty(keys[, attrs])</code>                       | Create instance with variables defined by <i>keys</i> and size 0.                         |
| <code>ensure_vars(vars[, raise_error])</code>                  | Ensure variables exist in column of <i>data</i> or <i>attrs</i> .                         |
| <code>filter(mask[, copy])</code>                              | Filter <i>data</i> according to a boolean array mask.                                     |
| <code>from_dict(obj[, copy])</code>                            | Create instance from dict representation containing data and attrs.                       |
| <code>generate_splits(n_splits[, copy])</code>                 | Split instance into <i>n_split</i> sub-vectors.                                           |
| <code>get(key[, default_value])</code>                         | Get values from <i>data</i> with <i>default_value</i> if key not in <i>data</i> .         |
| <code>get_data_or_attr(key[, default])</code>                  | Get value from <i>data</i> or <i>attrs</i> .                                              |
| <code>select(keys[, copy])</code>                              | Return new class instance only containing specified keys.                                 |
| <code>setdefault(key[, default])</code>                        | Shortcut to <code>VectorDataDict.setdefault()</code> .                                    |
| <code>sort(by)</code>                                          | Sort data by key(s).                                                                      |
| <code>sum(vectors[, infer_attrs, fill_value])</code>           | Sum a list of <i>VectorDataset</i> instances.                                             |
| <code>to_dataframe([copy])</code>                              | Create <code>pd.DataFrame</code> in which each key-value pair in <i>data</i> is a column. |
| <code>to_dict()</code>                                         | Create dictionary with <i>data</i> and <i>attrs</i> .                                     |
| <code>update([other])</code>                                   | Update values in <i>data</i> dict without warning if overwriting.                         |

## Attributes

|                  |                                                                                         |
|------------------|-----------------------------------------------------------------------------------------|
| <i>data</i>      | Vector data with labels as keys and <code>numpy.ndarray</code> as values                |
| <i>attrs</i>     | Generic dataset attributes                                                              |
| <i>dataframe</i> | Shorthand property to access <code>to_dataframe()</code> with <code>copy=False</code> . |
| <i>hash</i>      | Generate a unique hash for this class instance.                                         |
| <i>shape</i>     | Shape of each array in <i>data</i> .                                                    |
| <i>size</i>      | Length of each array in <i>data</i> .                                                   |

### attrs

Generic dataset attributes

### `broadcast_attrs(keys, overwrite=False, raise_error=True)`

Attach values from keys in *attrs* onto *data*.

If possible, use `dtype = np.float32` when broadcasting. If not possible, use whatever `dtype` is inferred from the data by `numpy.full()`.

#### Parameters

- *keys* (`str` | `Iterable[str]`) – Keys to broadcast

- **overwrite** (*bool, optional*) – If True, overwrite existing values in *data*. By default False.
- **raise\_error** (*bool, optional*) – Raise `KeyError` if `self.attrs` does not contain some of keys.

**Raises**

**KeyError** – Not all keys found in *attrs*.

**broadcast\_numeric\_attrs**(*ignore\_keys=None, overwrite=False*)

Attach numeric values in *attrs* onto *data*.

Iterate through values in *attrs* and attach `float` and `int` values to *data*.

This method modifies object in place.

**Parameters**

- **ignore\_keys** (*str | Iterable[str], optional*) – Do not broadcast selected keys. Defaults to None.
- **overwrite** (*bool, optional*) – If True, overwrite existing values in *data*. By default False.

**copy**(*\*\*kwargs*)

Return a copy of this `VectorDatasetType` class.

**Parameters**

**\*\*kwargs** (*Any*) – Additional keyword arguments passed into the constructor of the returned class.

**Returns**

`VectorDatasetType` – Copy of class

**classmethod create\_empty**(*keys, attrs=None, \*\*attrs\_kwargs*)

Create instance with variables defined by *keys* and size 0.

If instance requires additional variables to be defined, these keys will automatically be attached to returned instance.

**Parameters**

- **keys** (*Iterable[str]*) – Keys to include in empty `VectorDataset` instance.
- **attrs** (*dict[str, Any] | None, optional*) – Attributes to attach instance.
- **\*\*attrs\_kwargs** (*Any*) – Define attributes as keyword arguments.

**Returns**

`VectorDatasetType` – Empty `VectorDataset` instance.

**data**

Vector data with labels as keys and `numpy.ndarray` as values

**property dataframe**

Shorthand property to access `to_dataframe()` with `copy=False`.

**Returns**

`pandas.DataFrame` – Equivalent to the output from `to_dataframe()`

**ensure\_vars**(*vars, raise\_error=True*)

Ensure variables exist in column of *data* or *attrs*.

**Parameters**

- **vars** (*str | Iterable[str]*) – A single string variable name or a sequence of string variable names.



- **raise\_error** (*bool, optional*) – Raise `KeyError` if data does not contain variables. Defaults to `True`.

**Returns**

`bool` – True if all variables exist. False otherwise.

**Raises**

**KeyError** – Raises when dataset does not contain variable in vars

**filter**(*mask, copy=True, \*\*kwargs*)

Filter *data* according to a boolean array mask.

Entries corresponding to `mask == True` are kept.

**Parameters**

- **mask** (`npt.NDArray[np.bool_]`) – Boolean array with compatible shape.
- **copy** (*bool, optional*) – Copy data on filter. Defaults to `True`. See [numpy best practices](#) for insight into whether copy is appropriate.
- **\*\*kwargs** (*Any*) – Additional keyword arguments passed into the constructor of the returned class.

**Returns**

`VectorDatasetType` – Containing filtered data

**Raises**

**TypeError** – If mask is not a boolean array.

**classmethod from\_dict**(*obj, copy=True, \*\*obj\_kwargs*)

Create instance from dict representation containing data and attrs.

**Parameters**

- **obj** (`dict[str, Any]`) – Dict representation of `VectorDataset` (e.g. `to_dict()`)
- **copy** (*bool, optional*) – Passed to `VectorDataset` constructor. Defaults to `True`.
- **\*\*obj\_kwargs** (*Any*) – Additional properties passed as keyword arguments.

**Returns**

`VectorDatasetType` – `VectorDataset` instance.

**See also:**

`to_dict()`

**generate\_splits**(*n\_splits, copy=True*)

Split instance into `n_split` sub-vectors.

**Parameters**

- **n\_splits** (*int*) – Number of splits.
- **copy** (*bool, optional*) – Passed into `filter()`. Defaults to `True`. Recommend to keep as `True` based on [numpy best practices](#).

**Returns**

`Generator[VectorDatasetType, None, None]` – Generator of split vectors.

**See also:**

`numpy.array_split()`

**get**(*key*, *default\_value=None*)

Get values from *data* with *default\_value* if *key* not in *data*.

**Parameters**

- **key** (*str*) – Key to get from *data*
- **default\_value** (*Any*, *optional*) – Return *default\_value* if *key* not in *data*, by default *None*

**Returns**

*Any* – Values at *data[key]* or *default\_value*

**get\_data\_or\_attr**(*key*, *default=<object object>*)

Get value from *data* or *attrs*.

This method first checks if *key* is in *data* and returns the value if so. If *key* is not in *data*, then this method checks if *key* is in *attrs* and returns the value if so. If *key* is not in *data* or *attrs*, then the *default* value is returned if provided. Otherwise a *KeyError* is raised.

**Parameters**

- **key** (*str*) – Key to get from *data* or *attrs*
- **default** (*Any*, *optional*) – Default value to return if *key* is not in *data* or *attrs*.

**Returns**

*Any* – Value at *data[key]* or *attrs[key]*

**Raises**

*KeyError* – If *key* is not in *data* or *attrs* and *default* is not provided.

**Examples**

```
>>> vector = VectorDataset({"a": [1, 2, 3]}, attrs={"b": 4})
>>> vector.get_data_or_attr("a")
array([1, 2, 3])
```

```
>>> vector.get_data_or_attr("b")
4
```

```
>>> vector.get_data_or_attr("c")
Traceback (most recent call last):
...
KeyError: "Key 'c' not found in data or attrs."
```

```
>>> vector.get_data_or_attr("c", default=5)
5
```

**property hash**

Generate a unique hash for this class instance.

**Returns**

*str* – Unique hash for flight instance (sha1)

**select**(*keys*, *copy=True*)

Return new class instance only containing specified keys.

**Parameters**

- **keys** (`Iterable[str]`) – An iterable of keys to filter by.
- **copy** (`bool`, *optional*) – Copy data on selection. Defaults to `True`.

**Returns**

`VectorDataset` – `VectorDataset` containing only data associated to `keys`. Note that this method always returns a `VectorDataset`, even if the calling class is a proper subclass of `VectorDataset`.

**setdefault**(*key*, *default=None*)

Shortcut to `VectorDataDict.setdefault()`.

**Parameters**

- **key** (`str`) – Key in `data` dict.
- **default** (`npt.ArrayLike`, *optional*) – Values to use as default, if key is not defined

**Returns**

`numpy.ndarray` – Values at key

**property shape**

Shape of each array in `data`.

**Returns**

`tuple[int]` – Shape of each array in `data`.

**property size**

Length of each array in `data`.

**Returns**

`int` – Length of each array in `data`.

**sort**(*by*)

Sort data by key(s).

This method always creates a copy of the data by calling `pandas.DataFrame.sort_values()`.

**Parameters**

**by** (`str` | `list[str]`) – Key or list of keys to sort by.

**Returns**

`VectorDatasetType` – Instance with sorted data.

**classmethod sum**(*vectors*, *infer\_attrs=True*, *fill\_value=None*)

Sum a list of `VectorDataset` instances.

**Parameters**

- **vectors** (`Sequence[VectorDataset]`) – List of `VectorDataset` instances to concatenate.
- **infer\_attrs** (`bool`, *optional*) – If `True`, infer attributes from the first element in the sequence.
- **fill\_value** (`float`, *optional*) – Fill value to use when concatenating arrays. By default `None`, which raises an error if incompatible keys are found.

**Returns**

`VectorDataset` – Sum of all instances in `vectors`.

**Raises**

**KeyError** – If incompatible *data* keys are found among vectors.

**Examples**

```
>>> from pycontrails import VectorDataset
>>> v1 = VectorDataset({"a": [1, 2, 3], "b": [4, 5, 6]})
>>> v2 = VectorDataset({"a": [7, 8, 9], "b": [10, 11, 12]})
>>> v3 = VectorDataset({"a": [13, 14, 15], "b": [16, 17, 18]})
>>> v = VectorDataset.sum([v1, v2, v3])
>>> v.dataframe
   a  b
0  1  4
1  2  5
2  3  6
3  7 10
4  8 11
5  9 12
6 13 16
7 14 17
8 15 18
```

**to\_dataframe(*copy=True*)**

Create `pd.DataFrame` in which each key-value pair in *data* is a column.

`DataFrame` does **not** copy data by default. Use the `copy` parameter to copy data values on creation.

**Parameters**

**copy** (`bool`, *optional*) – Copy data on `DataFrame` creation.

**Returns**

`pandas.DataFrame` – `DataFrame` holding key-values as columns.

**to\_dict()**

Create dictionary with *data* and *attrs*.

If geo-spatial coordinates (e.g. "latitude", "longitude", "altitude") are present, round to a reasonable precision. If a "time" variable is present, round to unix seconds. When the instance is a `GeoVectorDataset`, disregard any "altitude" or "level" coordinate and only include "altitude\_ft" in the output.

**Returns**

`dict[str, Any]` – Dictionary with *data* and *attrs*.

**See also:**

`from_dict()`

## Examples

```
>>> import pprint
>>> from pycontrails import Flight
>>> fl = Flight(
...     longitude=[-100, -110],
...     latitude=[40, 50],
...     level=[200, 200],
...     time=[np.datetime64("2020-01-01T09"), np.datetime64("2020-01-01T09:30
↵")],
...     aircraft_type="B737",
... )
>>> fl = fl.resample_and_fill("5min")
>>> pprint.pprint(fl.to_dict())
{'aircraft_type': 'B737',
 'altitude_ft': [38661.0, 38661.0, 38661.0, 38661.0, 38661.0, 38661.0, 38661.0],
 'crs': 'EPSG:4326',
 'latitude': [40.0, 41.724, 43.428, 45.111, 46.769, 48.399, 50.0],
 'longitude': [-100.0,
               -101.441,
               -102.959,
               -104.563,
               -106.267,
               -108.076,
               -110.0],
 'time': [1577869200,
          1577869500,
          1577869800,
          1577870100,
          1577870400,
          1577870700,
          1577871000]}
```

**update**(*other=None*, *\*\*kwargs*)

Update values in *data* dict without warning if overwriting.

### Parameters

- **other** (dict[str, npt.ArrayLike] | None, *optional*) – Fields to update as dict
- **\*\*kwargs** (npt.ArrayLike) – Fields to update as kwargs

## pycontrails.GeoVectorDataset

```
class pycontrails.GeoVectorDataset(data=None, *, longitude=None, latitude=None, altitude=None,
                                  altitude_ft=None, level=None, time=None, attrs=None, copy=True,
                                  **attrs_kwargs)
```

Bases: *VectorDataset*

Base class to hold 1D geospatial arrays of consistent size.

GeoVectorDataset is required to have geospatial coordinate keys defined in *required\_keys*.

Expect latitude-longitude CRS in WGS 84. Expect altitude in [*m*]. Expect level in [*hPa*].

Each spatial variable is expected to have “float32” or “float64” dtype. The time variable is expected to have “datetime64[ns]” dtype.

Use the attribute `attr["crs"]` to specify coordinate reference system using [PROJ](#) or [EPSG](#) syntax.

### Parameters

- **data** (`dict[str, npt.ArrayLike] | pd.DataFrame | VectorDataDict | VectorDataset | None, optional`) – Data dictionary or `pandas.DataFrame`. Must include keys/columns `time`, `latitude`, `longitude`, `altitude` or `level`. Keyword arguments for `time`, `latitude`, `longitude`, `altitude` or `level` override data inputs. Expects `altitude` in meters and `time` as a `DatetimeLike` (or array that can processed with `pd.to_datetime()`). Additional waypoint-specific data can be included as additional keys/columns.
- **longitude** (`npt.ArrayLike, optional`) – Longitude data. Defaults to `None`.
- **latitude** (`npt.ArrayLike, optional`) – Latitude data. Defaults to `None`.
- **altitude** (`npt.ArrayLike, optional`) – Altitude data, [*m*]. Defaults to `None`.
- **altitude\_ft** (`npt.ArrayLike, optional`) – Altitude data, [*ft*]. Defaults to `None`.
- **level** (`npt.ArrayLike, optional`) – Level data, [*hPa*]. Defaults to `None`.
- **time** (`npt.ArrayLike, optional`) – Time data. Expects an array of `DatetimeLike` values, or array that can processed with `pd.to_datetime()`. Defaults to `None`.
- **attrs** (`dict[Hashable, Any] | AttrDict, optional`) – Additional properties as a dictionary. Defaults to `{}`.
- **copy** (`bool, optional`) – Copy data on class creation. Defaults to `True`.
- **\*\*attrs\_kwargs** (`Any`) – Additional properties passed as keyword arguments.

### Raises

**KeyError** – Raises if data input does not contain at least `time`, `latitude`, `longitude`, (`altitude` or `level`).

`__init__` (`data=None, *, longitude=None, latitude=None, altitude=None, altitude_ft=None, level=None, time=None, attrs=None, copy=True, **attrs_kwargs`)

## Methods

|                                                                |                                                                                  |
|----------------------------------------------------------------|----------------------------------------------------------------------------------|
| <code>T_isa()</code>                                           | Calculate the ICAO standard atmosphere temperature at each point.                |
| <code>__init__([data, longitude, latitude, ...])</code>        |                                                                                  |
| <code>broadcast_attrs(keys[, overwrite, raise_error])</code>   | Attach values from keys in attrs onto data.                                      |
| <code>broadcast_numeric_attrs([ignore_keys, overwrite])</code> | Attach numeric values in attrs onto data.                                        |
| <code>coords_intersect_met(met)</code>                         | Return boolean mask of data inside the bounding box defined by met.              |
| <code>copy(**kwargs)</code>                                    | Return a copy of this VectorDatasetType class.                                   |
| <code>create_empty([keys, attrs])</code>                       | Create instance with variables defined by keys and size 0.                       |
| <code>downselect_met(met, *[, longitude_buffer, ...])</code>   | Downselect met to encompass a spatiotemporal region of the data.                 |
| <code>ensure_vars(vars[, raise_error])</code>                  | Ensure variables exist in column of data or attrs.                               |
| <code>filter(mask[, copy])</code>                              | Filter data according to a boolean array mask.                                   |
| <code>from_dict(obj[, copy])</code>                            | Create instance from dict representation containing data and attrs.              |
| <code>generate_splits(n_splits[, copy])</code>                 | Split instance into n_split sub-vectors.                                         |
| <code>get(key[, default_value])</code>                         | Get values from data with default_value if key not in data.                      |
| <code>get_data_or_attr(key[, default])</code>                  | Get value from data or attrs.                                                    |
| <code>intersect_met(mda, *[, longitude, latitude, ...])</code> | Intersect waypoints with MetDataArray.                                           |
| <code>select(keys[, copy])</code>                              | Return new class instance only containing specified keys.                        |
| <code>setdefault(key[, default])</code>                        | Shortcut to VectorDataDict.setdefault().                                         |
| <code>sort(by)</code>                                          | Sort data by key(s).                                                             |
| <code>sum(vectors[, infer_attrs, fill_value])</code>           | Sum a list of VectorDataset instances.                                           |
| <code>to_dataframe([copy])</code>                              | Create pd.DataFrame in which each key-value pair in data is a column.            |
| <code>to_dict()</code>                                         | Create dictionary with data and attrs.                                           |
| <code>to_geojson_points()</code>                               | Return dataset as GeoJSON FeatureCollection of Points.                           |
| <code>to_lon_lat_grid(agg, *[, spatial_bbox, ...])</code>      | Convert vectors to a longitude-latitude grid.                                    |
| <code>to_pseudo_mercator([copy])</code>                        | Convert data from attrs["crs"] to Pseudo Mercator (EPSG:3857).                   |
| <code>transform_crs(crs[, copy])</code>                        | Transform trajectory data from one coordinate reference system (CRS) to another. |
| <code>update([other])</code>                                   | Update values in data dict without warning if overwriting.                       |

## Attributes

|                            |                                                                                         |
|----------------------------|-----------------------------------------------------------------------------------------|
| <code>air_pressure</code>  | Get <code>air_pressure</code> values for points.                                        |
| <code>altitude</code>      | Get altitude.                                                                           |
| <code>altitude_ft</code>   | Get altitude in feet.                                                                   |
| <code>attrs</code>         | Generic dataset attributes                                                              |
| <code>constants</code>     | Return a dictionary of constant attributes and data values.                             |
| <code>coords</code>        | Get geospatial coordinates for compatibility with <code>MetdataArray</code> .           |
| <code>data</code>          | Vector data with labels as keys and <code>numpy.ndarray</code> as values                |
| <code>dataframe</code>     | Shorthand property to access <code>to_dataframe()</code> with <code>copy=False</code> . |
| <code>hash</code>          | Generate a unique hash for this class instance.                                         |
| <code>level</code>         | Get pressure <code>level</code> values for points.                                      |
| <code>required_keys</code> | Required keys for creating <code>GeoVectorDataset</code>                                |
| <code>shape</code>         | Shape of each array in <code>data</code> .                                              |
| <code>size</code>          | Length of each array in <code>data</code> .                                             |
| <code>vertical_keys</code> | At least one of these vertical-coordinate keys must also be included                    |

### `T_isa()`

Calculate the ICAO standard atmosphere temperature at each point.

#### Returns

`npt.NDArray[np.float64]` – ISA temperature, [*K*]

#### See also:

`pycontrails.physics.units.m_to_T_isa()`

### property `air_pressure`

Get `air_pressure` values for points.

#### Returns

`npt.NDArray[np.float64]` – Point air pressure values, [*Pa*]

### property `altitude`

Get altitude.

Automatically calculates altitude using `units.pl_to_m()` using `level` key.

Note that if `altitude` key exists in `data`, the data at the `altitude` key will be returned. This allows an override of the default calculation of altitude from pressure level.

#### Returns

`npt.NDArray[np.float64]` – Altitude, [*m*]

### property `altitude_ft`

Get altitude in feet.

#### Returns

`npt.NDArray[np.float64]` – Altitude, [*ft*]



**property constants**

Return a dictionary of constant attributes and data values.

Includes `attrs` and values from columns in `data` with a unique value.

**Returns**

`dict[str, Any]` – Properties and their constant values

**property coords**

Get geospatial coordinates for compatibility with `MetdataArray`.

**Returns**

`pandas.DataFrame` – `pd.DataFrame` with columns `longitude`, `latitude`, `level`, and `time`.

**coords\_intersect\_met(*met*)**

Return boolean mask of data inside the bounding box defined by `met`.

**Parameters**

**met** (`MetDataset` | `MetdataArray`) – `MetDataset` or `MetdataArray` to compare.

**Returns**

`np.ndarray[bool]` – True if point is inside the bounding box defined by `met`.

**classmethod create\_empty(*keys=None, attrs=None, \*\*attrs\_kwargs*)**

Create instance with variables defined by `keys` and size 0.

If instance requires additional variables to be defined, these keys will automatically be attached to returned instance.

**Parameters**

- **keys** (`Iterable[str]`) – Keys to include in empty `VectorDataset` instance.
- **attrs** (`dict[str, Any]` | `None`, *optional*) – Attributes to attach instance.
- **\*\*attrs\_kwargs** (`Any`) – Define attributes as keyword arguments.

**Returns**

`VectorDatasetType` – Empty `VectorDataset` instance.

**downselect\_met(*met, \*, longitude\_buffer=(0.0, 0.0), latitude\_buffer=(0.0, 0.0), level\_buffer=(0.0, 0.0), time\_buffer=(numpy.timedelta64(0, 'h'), numpy.timedelta64(0, 'h')), copy=True*)**

Downselect `met` to encompass a spatiotemporal region of the data.

**Parameters**

- **met** (`MetDataset` | `MetdataArray`) – `MetDataset` or `MetdataArray` to downselect.
- **longitude\_buffer** (`tuple[float, float]`, *optional*) – Extend longitude domain past by `longitude_buffer[0]` on the low side and `longitude_buffer[1]` on the high side. Units must be the same as class coordinates. Defaults to (0, 0) degrees.
- **latitude\_buffer** (`tuple[float, float]`, *optional*) – Extend latitude domain past by `latitude_buffer[0]` on the low side and `latitude_buffer[1]` on the high side. Units must be the same as class coordinates. Defaults to (0, 0) degrees.
- **level\_buffer** (`tuple[float, float]`, *optional*) – Extend level domain past by `level_buffer[0]` on the low side and `level_buffer[1]` on the high side. Units must be the same as class coordinates. Defaults to (0, 0) [hPa].
- **time\_buffer** (`tuple[np.timedelta64, np.timedelta64]`, *optional*) – Extend time domain past by `time_buffer[0]` on the low side and `time_buffer[1]` on the high side.

Units must be the same as class coordinates. Defaults to `(np.timedelta64(0, "h"), np.timedelta64(0, "h"))`.

- **copy** (*bool*) – If returned object is a copy or view of the original. True by default.

#### Returns

`MetDataset` | `MetdataArray` – Copy of downselected `MetDataset` or `MetdataArray`.

**intersect\_met**(*mda*, \*, *longitude=None*, *latitude=None*, *level=None*, *time=None*, *use\_indices=False*, *\*\*interp\_kwargs*)

Intersect waypoints with `MetdataArray`.

#### Parameters

- **mda** (*MetdataArray*) – `MetdataArray` containing a meteorological variable at spatio-temporal coordinates.
- **longitude** (`npt.NDArray[np.float64]`, *optional*) – Override existing coordinates for met interpolation
- **latitude** (`npt.NDArray[np.float64]`, *optional*) – Override existing coordinates for met interpolation
- **level** (`npt.NDArray[np.float64]`, *optional*) – Override existing coordinates for met interpolation
- **time** (`npt.NDArray[np.datetime64]`, *optional*) – Override existing coordinates for met interpolation
- **use\_indices** (*bool*, *optional*) – Experimental.
- **\*\*interp\_kwargs** (*Any*) – Additional keyword arguments to pass to `MetdataArray.intersect_met()`. Examples include `method`, `bounds_error`, and `fill_value`. If an error such as

```
ValueError: One of the requested xi is out of bounds in dimension 2
```

occurs, try calling this function with `bounds_error=False`. In addition, setting `fill_value=0.0` will replace NaN values with 0.0.

#### Returns

`npt.NDArray[np.float64]` – Interpolated values

#### Examples

```
>>> from datetime import datetime
>>> import pandas as pd
>>> import numpy as np
>>> from pycontrails.datalib.ecmwf import ERA5
>>> from pycontrails import Flight
```

```
>>> # Get met data
>>> times = (datetime(2022, 3, 1, 0), datetime(2022, 3, 1, 3))
>>> variables = ["air_temperature", "specific_humidity"]
>>> levels = [300, 250, 200]
>>> era5 = ERA5(time=times, variables=variables, pressure_levels=levels)
>>> met = era5.open_metdataset()
```

```
>>> # Example flight
>>> df = pd.DataFrame()
>>> df['longitude'] = np.linspace(0, 50, 10)
>>> df['latitude'] = np.linspace(0, 10, 10)
>>> df['altitude'] = 11000
>>> df['time'] = pd.date_range("2022-03-01T00", "2022-03-01T02", periods=10)
>>> fl = Flight(df)
```

```
>>> # Intersect
>>> fl.intersect_met(met['air_temperature'], method='nearest')
array([231.62969892, 230.72604651, 232.24318771, 231.88338483,
       231.06429438, 231.59073409, 231.65125393, 231.93064004,
       232.03344087, 231.65954432])
```

```
>>> fl.intersect_met(met['air_temperature'], method='linear')
array([225.77794552, 225.13908414, 226.231218 , 226.31831528,
       225.56102321, 225.81192149, 226.03192642, 226.22056121,
       226.03770174, 225.63226188])
```

```
>>> # Interpolate and attach to `Flight` instance
>>> for key in met:
...     fl[key] = fl.intersect_met(met[key])
```

```
>>> # Show the final three columns of the dataframe
>>> fl.dataframe.iloc[:, -3:].head()
      time  air_temperature  specific_humidity
0 2022-03-01 00:00:00      225.777946          0.000132
1 2022-03-01 00:13:20      225.139084          0.000132
2 2022-03-01 00:26:40      226.231218          0.000107
3 2022-03-01 00:40:00      226.318315          0.000171
4 2022-03-01 00:53:20      225.561022          0.000109
```

### property level

Get pressure level values for points.

Automatically calculates pressure level using `units.m_to_pl()` using `altitude` key.

Note that if `level` key exists in data, the data at the `level` key will be returned. This allows an override of the default calculation of pressure level from altitude.

#### Returns

`npt.NDArray[np.float64]` – Point pressure level values, [*hPa*]

**required\_keys = ('longitude', 'latitude', 'time')**

Required keys for creating `GeoVectorDataset`

**to\_gejson\_points()**

Return dataset as `GeoJSON FeatureCollection` of Points.

Each Feature has a `properties` attribute that includes `time` and other data besides `latitude`, `longitude`, and `altitude` in data.

#### Returns

`dict[str, Any]` – Python representation of `GeoJSON FeatureCollection`

**to\_lon\_lat\_grid**(*agg*, \*, *spatial\_bbox*=(-180.0, -90.0, 180.0, 90.0), *spatial\_grid\_res*=0.5)

Convert vectors to a longitude-latitude grid.

**See also:**

`vector_to_lon_lat_grid`

**to\_pseudo\_mercator**(*copy*=True)

Convert data from `attrs["crs"]` to Pseudo Mercator (EPSG:3857).

**Parameters**

**copy** (*bool*, *optional*) – Copy data on transformation. Defaults to True.

**Returns**

`GeoVectorDatasetType`

**transform\_crs**(*crs*, *copy*=True)

Transform trajectory data from one coordinate reference system (CRS) to another.

**Parameters**

- **crs** (*str*) – Target CRS. Passed into `pyproj.Transformer`. The source CRS is inferred from the `attrs["crs"]` attribute.
- **copy** (*bool*, *optional*) – Copy data on transformation. Defaults to True.

**Returns**

`GeoVectorDatasetType` – Converted dataset with new coordinate reference system. `attrs["crs"]` reflects new crs.

**vertical\_keys** = ('altitude', 'level', 'altitude\_ft')

At least one of these vertical-coordinate keys must also be included

### 11.1.3 Flight & Aircraft

|                                                                                                  |                                                                         |
|--------------------------------------------------------------------------------------------------|-------------------------------------------------------------------------|
| <code>Flight</code> ([ <i>data</i> , <i>longitude</i> , <i>latitude</i> , ...])                  | A single flight trajectory.                                             |
| <code>Fleet</code> ([ <i>data</i> , <i>longitude</i> , <i>latitude</i> , <i>altitude</i> , ...]) | Data structure for holding a sequence of <code>Flight</code> instances. |
| <code>FlightPhase</code> ( <i>value</i> [, <i>names</i> , <i>module</i> , ...])                  | Flight phase enumeration.                                               |
| <code>Fuel</code> ( <i>fuel_name</i> , <i>q_fuel</i> , <i>hydrogen_content</i> , ...)            | Base class for the physical parameters of the fuel.                     |
| <code>JetA</code> ([ <i>fuel_name</i> , <i>q_fuel</i> , <i>hydrogen_content</i> , ...])          | Jet A-1 Fuel.                                                           |
| <code>SAFBlend</code> ( <i>pct_blend</i> )                                                       | Jet A-1 / Sustainable Aviation Fuel Blend.                              |
| <code>HydrogenFuel</code> ([ <i>fuel_name</i> , <i>q_fuel</i> , ...])                            | Hydrogen Fuel.                                                          |

#### pycontrails.Flight

**class** `pycontrails.Flight`(*data*=None, \*, *longitude*=None, *latitude*=None, *altitude*=None, *altitude\_ft*=None, *level*=None, *time*=None, *attrs*=None, *copy*=True, *fuel*=None, *drop\_duplicated\_times*=False, **\*\**attrs\_kwargs***)

Bases: `GeoVectorDataset`

A single flight trajectory.

Expect latitude-longitude coordinates in WGS 84. Expect altitude in [*m*]. Expect pressure level (*level*) in [*hPa*].

Use the attribute `attrs["crs"]` to specify coordinate reference system using PROJ or EPSG syntax.

## Parameters

- **data** (`dict[str, np.ndarray] | pd.DataFrame | VectorDataDict | VectorDataset | None`) – Flight trajectory waypoints as data dictionary or `pandas.DataFrame`. Must include columns `time`, `latitude`, `longitude`, `altitude` or `level`. Keyword arguments for `time`, `latitude`, `longitude`, `altitude` or `level` will override data inputs. Expects `altitude` in meters and `time` as a `DatetimeLike` (or array that can be processed with `pd.to_datetime()`). Additional waypoint-specific data can be included as additional keys/columns.
- **longitude** (`npt.ArrayLike, optional`) – Flight trajectory waypoint longitude. Defaults to `None`.
- **latitude** (`npt.ArrayLike, optional`) – Flight trajectory waypoint latitude. Defaults to `None`.
- **altitude** (`npt.ArrayLike, optional`) – Flight trajectory waypoint altitude, [*m*]. Defaults to `None`.
- **altitude\_ft** (`npt.ArrayLike, optional`) – Flight trajectory waypoint altitude, [*ft*].
- **level** (`npt.ArrayLike, optional`) – Flight trajectory waypoint pressure level, [*hPa*]. Defaults to `None`.
- **time** (`npt.ArrayLike, optional`) – Flight trajectory waypoint time. Defaults to `None`.
- **attrs** (`dict[str, Any], optional`) – Additional flight properties as a dictionary. While different models may utilize Flight attributes differently, pycontrails applies the following conventions:
  - `flight_id`: An internal flight identifier. Used internally for *Fleet* interoperability.
  - `aircraft_type`: Aircraft type ICAO, e.g. "A320".
  - `wingspan`: Aircraft wingspan, [*m*].
  - `n_engine`: Number of aircraft engines.
  - `engine_uid`: Aircraft engine unique identifier. Used for emissions calculations with the ICAO Aircraft Emissions Databank (EDB).
  - `max_mach_number`: Maximum Mach number at cruise altitude. Used by some aircraft performance models to clip true airspeed.

Numeric quantities that are constant over the entire flight trajectory should be included as attributes.
- **copy** (`bool, optional`) – Copy data on Flight creation. Defaults to `True`.
- **fuel** (`Fuel, optional`) – Fuel used in flight trajectory. Defaults to *JetA*.
- **drop\_duplicated\_times** (`bool, optional`) – Drop duplicate times in flight trajectory. Defaults to `False`.
- **\*\*attrs\_kwargs** (`Any`) – Additional flight properties passed as keyword arguments.

## Raises

**KeyError** – Raises if data input does not contain at least `time`, `latitude`, `longitude`, (`altitude` or `level`).

## Notes

The `Traffic` library has many helpful flight processing utilities.

See `traffic.core.Flight` for more information.

## Examples

```
>>> import numpy as np
>>> import pandas as pd
>>> from pycontrails import Flight
```

```
>>> # Create `Flight` from a DataFrame.
>>> df = pd.DataFrame({
...     "longitude": np.linspace(20, 30, 500),
...     "latitude": np.linspace(40, 10, 500),
...     "altitude": 10500,
...     "time": pd.date_range('2021-01-01T10', '2021-01-01T15', periods=500),
... })
>>> fl = Flight(data=df, flight_id=123) # specify a flight_id by keyword
>>> fl
Flight [4 keys x 500 length, 2 attributes]
Keys: longitude, latitude, altitude, time
Attributes:
time          [2021-01-01 10:00:00, 2021-01-01 15:00:00]
longitude     [20.0, 30.0]
latitude      [10.0, 40.0]
altitude      [10500.0, 10500.0]
flight_id     123
crs           EPSG:4326
```

```
>>> # Create `Flight` from keywords
>>> fl = Flight(
...     longitude=np.linspace(20, 30, 200),
...     latitude=np.linspace(40, 30, 200),
...     altitude=11000 * np.ones(200),
...     time=pd.date_range('2021-01-01T12', '2021-01-01T14', periods=200),
... )
>>> fl
Flight [4 keys x 200 length, 1 attributes]
Keys: longitude, latitude, time, altitude
Attributes:
time          [2021-01-01 12:00:00, 2021-01-01 14:00:00]
longitude     [20.0, 30.0]
latitude      [30.0, 40.0]
altitude      [11000.0, 11000.0]
crs           EPSG:4326
```

```
>>> # Access the underlying data as DataFrame
>>> fl.dataframe.head()
   longitude  latitude          time  altitude
0  20.000000  40.000000  2021-01-01 12:00:00.000000000  11000.0
```

(continues on next page)

(continued from previous page)

```

1  20.050251  39.949749  2021-01-01  12:00:36.180904522  11000.0
2  20.100503  39.899497  2021-01-01  12:01:12.361809045  11000.0
3  20.150754  39.849246  2021-01-01  12:01:48.542713567  11000.0
4  20.201005  39.798995  2021-01-01  12:02:24.723618090  11000.0

```

```

__init__(data=None, *, longitude=None, latitude=None, altitude=None, altitude_ft=None, level=None,
         time=None, attrs=None, copy=True, fuel=None, drop_duplicated_times=False, **attrs_kwargs)

```

## Methods

|                                                                |                                                                                         |
|----------------------------------------------------------------|-----------------------------------------------------------------------------------------|
| <code>T_isa()</code>                                           | Calculate the ICAO standard atmosphere temperature at each point.                       |
| <code>__init__([data, longitude, latitude, ...])</code>        |                                                                                         |
| <code>broadcast_attrs(keys[, overwrite, raise_error])</code>   | Attach values from keys in attrs onto data.                                             |
| <code>broadcast_numeric_attrs([ignore_keys, overwrite])</code> | Attach numeric values in attrs onto data.                                               |
| <code>clean_and_resample([freq, fill_method, ...])</code>      | Resample and (possibly) filter a flight trajectory.                                     |
| <code>coords_intersect_met(met)</code>                         | Return boolean mask of data inside the bounding box defined by met.                     |
| <code>copy(**kwargs)</code>                                    | Return a copy of this VectorDatasetType class.                                          |
| <code>create_empty([keys, attrs])</code>                       | Create instance with variables defined by keys and size 0.                              |
| <code>distance_to_coords(distance)</code>                      | Convert distance along flight path to geodesic coordinates.                             |
| <code>downselect_met(met, *, longitude_buffer, ...)</code>     | Downselect met to encompass a spatiotemporal region of the data.                        |
| <code>ensure_vars(vars[, raise_error])</code>                  | Ensure variables exist in column of data or attrs.                                      |
| <code>filter(mask[, copy])</code>                              | Filter data according to a boolean array mask.                                          |
| <code>filter_altitude([kernel_size, cruise_threshold])</code>  | Filter noisy altitude on a single flight.                                               |
| <code>filter_by_first()</code>                                 | Keep first row of group of waypoints with identical coordinates.                        |
| <code>from_dict(obj[, copy])</code>                            | Create instance from dict representation containing data and attrs.                     |
| <code>generate_splits(n_splits[, copy])</code>                 | Split instance into n_split sub-vectors.                                                |
| <code>get(key[, default_value])</code>                         | Get values from data with default_value if key not in data.                             |
| <code>get_data_or_attr(key[, default])</code>                  | Get value from data or attrs.                                                           |
| <code>intersect_met(mda, *, longitude, latitude, ...)</code>   | Intersect waypoints with MetDataArray.                                                  |
| <code>length_met(key[, threshold])</code>                      | Calculate total horizontal distance where column key exceeds threshold.                 |
| <code>plot(**kwargs)</code>                                    | Plot flight trajectory longitude-latitude values.                                       |
| <code>proportion_met(key[, threshold])</code>                  | Calculate proportion of flight with certain meteorological constraint.                  |
| <code>resample_and_fill([freq, fill_method, ...])</code>       | Resample and fill flight trajectory with geodesics and linear interpolation.            |
| <code>segment_angle()</code>                                   | Calculate sine and cosine for the angle between each segment and the longitudinal axis. |
| <code>segment_azimuth()</code>                                 | Calculate (forward) azimuth at each waypoint.                                           |
| <code>segment_duration([dtype])</code>                         | Compute time elapsed between waypoints in seconds.                                      |

continues on next page

Table 1 – continued from previous page

|                                                                 |                                                                                                         |
|-----------------------------------------------------------------|---------------------------------------------------------------------------------------------------------|
| <code>segment_groundspeed</code> ([smooth, window_length, ...]) | Return groundspeed across segments.                                                                     |
| <code>segment_haversine</code> ()                               | Compute Haversine (great circle) distance between flight waypoints.                                     |
| <code>segment_length</code> ()                                  | Compute spherical distance between flight waypoints.                                                    |
| <code>segment_mach_number</code> (true_airspeed, ...)           | Calculate the mach number of each segment.                                                              |
| <code>segment_phase</code> ([threshold_rocd, ...])              | Identify the phase of flight (climb, cruise, descent) for each segment.                                 |
| <code>segment_rocd</code> ()                                    | Calculate the rate of climb and descent (ROCD).                                                         |
| <code>segment_true_airspeed</code> ([u_wind, v_wind, ...])      | Calculate the true airspeed [ <i>m/s</i> ] from the ground speed and horizontal winds.                  |
| <code>select</code> (keys[, copy])                              | Return new class instance only containing specified keys.                                               |
| <code>setdefault</code> (key[, default])                        | Shortcut to <code>VectorDataDict.setdefault()</code> .                                                  |
| <code>sort</code> (by)                                          | Sort data by key(s).                                                                                    |
| <code>sum</code> (vectors[, infer_attrs, fill_value])           | Sum a list of <code>VectorDataset</code> instances.                                                     |
| <code>to_dataframe</code> ([copy])                              | Create <code>pd.DataFrame</code> in which each key-value pair in data is a column.                      |
| <code>to_dict</code> ()                                         | Create dictionary with data and attrs.                                                                  |
| <code>to_geojson_linestring</code> ()                           | Return trajectory as geojson <code>FeatureCollection</code> containing single <code>LineString</code> . |
| <code>to_geojson_multilinestring</code> (key[, ...])            | Return trajectory as GeoJSON <code>FeatureCollection</code> of <code>MultiLineStrings</code> .          |
| <code>to_geojson_points</code> ()                               | Return dataset as GeoJSON <code>FeatureCollection</code> of <code>Points</code> .                       |
| <code>to_lon_lat_grid</code> (agg, *[, spatial_bbox, ...])      | Convert vectors to a longitude-latitude grid.                                                           |
| <code>to_pseudo_mercator</code> ([copy])                        | Convert data from <code>attrs["crs"]</code> to Pseudo Mercator (EPSG:3857).                             |
| <code>to_traffic</code> ()                                      | Convert <code>Flight</code> instance to <code>traffic.core.Flight</code> instance.                      |
| <code>transform_crs</code> (crs[, copy])                        | Transform trajectory data from one coordinate reference system (CRS) to another.                        |
| <code>update</code> ([other])                                   | Update values in data dict without warning if overwriting.                                              |



## Attributes

|                               |                                                                                         |
|-------------------------------|-----------------------------------------------------------------------------------------|
| <code>fuel</code>             | Fuel used in flight trajectory                                                          |
| <code>air_pressure</code>     | Get <code>air_pressure</code> values for points.                                        |
| <code>altitude</code>         | Get altitude.                                                                           |
| <code>altitude_ft</code>      | Get altitude in feet.                                                                   |
| <code>attrs</code>            | Generic dataset attributes                                                              |
| <code>constants</code>        | Return a dictionary of constant attributes and data values.                             |
| <code>coords</code>           | Get geospatial coordinates for compatibility with <code>MetdataArray</code> .           |
| <code>data</code>             | Vector data with labels as keys and <code>numpy.ndarray</code> as values                |
| <code>dataframe</code>        | Shorthand property to access <code>to_dataframe()</code> with <code>copy=False</code> . |
| <code>duration</code>         | Determine flight duration.                                                              |
| <code>hash</code>             | Generate a unique hash for this class instance.                                         |
| <code>length</code>           | Return flight length based on WGS84 geodesic.                                           |
| <code>level</code>            | Get pressure <code>level</code> values for points.                                      |
| <code>max_distance_gap</code> | Return maximum distance gap between waypoints along flight trajectory.                  |
| <code>max_time_gap</code>     | Return maximum time gap between waypoints along flight trajectory.                      |
| <code>required_keys</code>    | Required keys for creating <code>GeoVectorDataset</code>                                |
| <code>shape</code>            | Shape of each array in <code>data</code> .                                              |
| <code>size</code>             | Length of each array in <code>data</code> .                                             |
| <code>time_end</code>         | Last waypoint time.                                                                     |
| <code>time_start</code>       | First waypoint time.                                                                    |
| <code>vertical_keys</code>    | At least one of these vertical-coordinate keys must also be included                    |

`clean_and_resample`(*freq='1min', fill\_method='geodesic', geodesic\_threshold=100000.0, nominal\_rocd=12.7, kernel\_size=17, cruise\_threshold=120.0, force\_filter=False, drop=True, keep\_original\_index=False, climb\_descend\_at\_end=False*)

Resample and (possibly) filter a flight trajectory.

Waypoints are resampled according to the frequency `freq`. If the original flight data has a short sampling period, `filter_altitude` will also be called to clean the data. Large gaps in trajectories may be interpolated as step climbs through `_altitude_interpolation`.

### Parameters

- **freq** (`str`, *optional*) – Resampling frequency, by default “1min”
- **fill\_method** (`{"geodesic", "linear"}`, *optional*) – Choose between "geodesic" and "linear", by default "geodesic". In geodesic mode, large gaps between waypoints are filled with geodesic interpolation and small gaps are filled with linear interpolation. In linear mode, all gaps are filled with linear interpolation.
- **geodesic\_threshold** (`float`, *optional*) – Threshold for geodesic interpolation, [*m*]. If the distance between consecutive waypoints is under this threshold, values are interpolated linearly.
- **nominal\_rocd** (`float`, *optional*) – Nominal rate of climb / descent for aircraft type. Defaults to `constants.nominal_rocd`.

- **kernel\_size** (*int, optional*) – Passed directly to `scipy.signal.medfilt()`, by default 11. Passed also to `scipy.signal.medfilt()`
- **cruise\_threshold** (*float, optional*) – Minimal length of time, in seconds, for a flight to be in cruise to apply median filter
- **force\_filter** (*bool, optional*) – If set to true, meth:`filter_altitude` will always be called. otherwise, it will only be called if the flight has a median sample period under 10 seconds
- **drop** (*bool, optional*) – Drop any columns that are not resampled and filled. Defaults to True, dropping all keys outside of “time”, “latitude”, “longitude” and “altitude”. If set to False, the extra keys will be kept but filled with nan or None values, depending on the data type.
- **keep\_original\_index** (*bool, optional*) – Keep the original index of the `Flight` in addition to the new resampled index. Defaults to False. .. versionadded:: 0.45.2
- **climb\_or\_descend\_at\_end** (*bool*) – If true, the climb or descent will be placed at the end of each segment rather than the start. Default is false (climb or descent immediately).

**Returns**`Flight` – Filled Flight**copy**(*\*\*kwargs*)Return a copy of this `VectorDatasetType` class.**Parameters****\*\*kwargs** (Any) – Additional keyword arguments passed into the constructor of the returned class.**Returns**`VectorDatasetType` – Copy of class**distance\_to\_coords**(*distance*)

Convert distance along flight path to geodesic coordinates.

Will return a tuple containing (*lat, lon, index*), where index indicates which flight segment contains the returned coordinate.**Parameters****distance** (`ArrayOrFloat`) – Distance along flight path, [*m*]**Returns**`(ArrayOrFloat, ArrayOrFloat, int | np.ndarray[int])` – latitude, longitude, and segment index corresponding to distance.**property duration**

Determine flight duration.

**Returns**`pd.Timedelta` – Difference between terminal and initial time**filter**(*mask, copy=True, \*\*kwargs*)

Filter data according to a boolean array mask.

Entries corresponding to `mask == True` are kept.**Parameters**

- **mask** (`np.ndarray[np.bool_]`) – Boolean array with compatible shape.
- **copy** (*bool, optional*) – Copy data on filter. Defaults to True. See [numpy best practices](#) for insight into whether copy is appropriate.

- **\*\*kwargs** (Any) – Additional keyword arguments passed into the constructor of the returned class.

**Returns**

VectorDatasetType – Containing filtered data

**Raises**

**TypeError** – If mask is not a boolean array.

**filter\_altitude**(*kernel\_size=17, cruise\_threshold=120.0*)

Filter noisy altitude on a single flight.

Currently runs altitude through a median filter using `scipy.signal.medfilt()` with `kernel_size`, then a Savitzky-Golay filter to filter noise. The median filter is only applied during cruise segments that are longer than `cruise_threshold`.

**Parameters**

- **kernel\_size** (int, optional) – Passed directly to `scipy.signal.medfilt()`, by default 11. Passed also to `scipy.signal.medfilt()`
- **cruise\_theshold** (float, optional) – Minimal length of time, in seconds, for a flight to be in cruise to apply median filter

**Returns**

*Flight* – Filtered Flight

**Notes**

Algorithm is derived from `traffic.core.flight.Flight.filter()`.

The `traffic` algorithm also computes thresholds on sliding windows and replaces unacceptable values with NaNs.

Errors may raised if the `kernel_size` is too large.

**See also:**

`traffic.core.flight.Flight.filter()`, `scipy.signal.medfilt()`

**filter\_by\_first()**

Keep first row of group of waypoints with identical coordinates.

Chaining this method with `resample_and_fill` often gives a cleaner trajectory when using noisy flight waypoints.

**Returns**

*Flight* – Filtered Flight instance

**Examples**

```
>>> from datetime import datetime
>>> import pandas as pd
```

```
>>> df = pd.DataFrame()
>>> df['longitude'] = [0, 0, 50]
>>> df['latitude'] = 0
>>> df['altitude'] = 0
>>> df['time'] = [datetime(2020, 1, 1, h) for h in range(3)]
```

```
>>> fl = Flight(df)
```

```
>>> fl.filter_by_first().dataframe
   longitude  latitude  altitude          time
0         0.0        0.0         0.0 2020-01-01 00:00:00
1         50.0        0.0         0.0 2020-01-01 02:00:00
```

**fuel**

Fuel used in flight trajectory

**property length**

Return flight length based on WGS84 geodesic.

**Returns**

`float` – Total flight length, [*m*]

**Raises**

**NotImplementedError** – Raises when `attr:attrs["crs"]` is not EPSG:4326

**Examples**

```
>>> import numpy as np
>>> fl = Flight(
...     longitude=np.linspace(20, 30, 200),
...     latitude=np.linspace(40, 30, 200),
...     altitude=11000 * np.ones(200),
...     time=pd.date_range('2021-01-01T12', '2021-01-01T14', periods=200),
... )
>>> fl.length
1436924.67...
```

**length\_met**(*key*, *threshold=1.0*)

Calculate total horizontal distance where column *key* exceeds *threshold*.

**Parameters**

- **key** (`str`) – Column key in data
- **threshold** (`float`) – Consider trajectory waypoints whose associated key value exceeds *threshold*, by default 1.0

**Returns**

`float` – Total distance, [*m*]

**Raises**

- **KeyError** – data does not contain column key
- **NotImplementedError** – Raised when `attrs["crs"]` is not EPSG:4326

## Examples

```
>>> from datetime import datetime
>>> import pandas as pd
>>> import numpy as np
>>> from pycontrails.datalib.ecmwf import ERA5
>>> from pycontrails import Flight
```

```
>>> # Get met data
>>> times = (datetime(2022, 3, 1, 0), datetime(2022, 3, 1, 3))
>>> variables = ["air_temperature", "specific_humidity"]
>>> levels = [300, 250, 200]
>>> era5 = ERA5(time=times, variables=variables, pressure_levels=levels)
>>> met = era5.open_metdataset()
```

```
>>> # Build flight
>>> df = pd.DataFrame()
>>> df['time'] = pd.date_range('2022-03-01T00', '2022-03-01T03', periods=11)
>>> df['longitude'] = np.linspace(-20, 20, 11)
>>> df['latitude'] = np.linspace(-20, 20, 11)
>>> df['altitude'] = np.linspace(9500, 10000, 11)
>>> fl = Flight(df).resample_and_fill('10s')
```

```
>>> # Intersect and attach
>>> fl["air_temperature"] = fl.intersect_met(met['air_temperature'])
>>> fl["air_temperature"]
array([235.94657007, 235.95766965, 235.96873412, ..., 234.59917962,
       234.60387402, 234.60845312])
```

```
>>> # Length (in meters) of waypoints whose temperature exceeds 236K
>>> fl.length_met("air_temperature", threshold=236)
4132178.159...
```

```
>>> # Proportion (with respect to distance) of waypoints whose temperature_
↳ exceeds 236K
>>> fl.proportion_met("air_temperature", threshold=236)
0.663552...
```

### property `max_distance_gap`

Return maximum distance gap between waypoints along flight trajectory.

Distance is calculated based on WGS84 geodesic.

#### Returns

`float` – Maximum distance between waypoints, [*m*]

#### Raises

`NotImplementedError` – Raises when `attr:attrs["crs"]` is not EPSG:4326

## Examples

```
>>> import numpy as np
>>> fl = Flight(
...     longitude=np.linspace(20, 30, 200),
...     latitude=np.linspace(40, 30, 200),
...     altitude=11000 * np.ones(200),
...     time=pd.date_range('2021-01-01T12', '2021-01-01T14', periods=200),
... )
>>> fl.max_distance_gap
7391.27...
```

### property `max_time_gap`

Return maximum time gap between waypoints along flight trajectory.

#### Returns

`pd.Timedelta` – Gap size

## Examples

```
>>> import numpy as np
>>> fl = Flight(
...     longitude=np.linspace(20, 30, 200),
...     latitude=np.linspace(40, 30, 200),
...     altitude=11000 * np.ones(200),
...     time=pd.date_range('2021-01-01T12', '2021-01-01T14', periods=200),
... )
>>> fl.max_time_gap
Timedelta('0 days 00:00:36.180...')
```

### `plot(**kwargs)`

Plot flight trajectory longitude-latitude values.

#### Parameters

**`**kwargs`** (Any) – Additional plot properties to passed to `pd.DataFrame.plot`

#### Returns

`matplotlib.axes.Axes` – Plot

### `proportion_met(key, threshold=1.0)`

Calculate proportion of flight with certain meteorological constraint.

#### Parameters

- **key** (`str`) – Column key in data
- **threshold** (`float`) – Consider trajectory waypoints whose associated key value exceeds threshold, Defaults to 1.0

#### Returns

`float` – Ratio

### `resample_and_fill(freq='1min', fill_method='geodesic', geodesic_threshold=100000.0, nominal_rocd=12.7, drop=True, keep_original_index=False, climb_descend_at_end=False)`

Resample and fill flight trajectory with geodesics and linear interpolation.

Waypoints are resampled according to the frequency `freq`. Values for data columns `longitude`, `latitude`, and `altitude` are interpolated.

Resampled waypoints will include all multiples of `freq` between the flight start and end time. For example, when resampling to a frequency of 1 minute, a flight that starts at 2020/1/1 00:00:59 and ends at 2020/1/1 00:01:01 will return a single waypoint at 2020/1/1 00:01:00, whereas a flight that starts at 2020/1/1 00:01:01 and ends at 2020/1/1 00:01:59 will return an empty flight.

### Parameters

- **freq** (`str`, *optional*) – Resampling frequency, by default “1min”
- **fill\_method** (`{“geodesic”, “linear”}`, *optional*) – Choose between “geodesic” and “linear”, by default “geodesic”. In geodesic mode, large gaps between waypoints are filled with geodesic interpolation and small gaps are filled with linear interpolation. In linear mode, all gaps are filled with linear interpolation.
- **geodesic\_threshold** (`float`, *optional*) – Threshold for geodesic interpolation, [*m*]. If the distance between consecutive waypoints is under this threshold, values are interpolated linearly.
- **nominal\_rocd** (`float | None`, *optional*) – Nominal rate of climb / descent for aircraft type. Defaults to `constants.nominal_rocd`.
- **drop** (`bool`, *optional*) – Drop any columns that are not resampled and filled. Defaults to `True`, dropping all keys outside of “time”, “latitude”, “longitude” and “altitude”. If set to `False`, the extra keys will be kept but filled with `nan` or `None` values, depending on the data type.
- **keep\_original\_index** (`bool`, *optional*) – Keep the original index of the `Flight` in addition to the new resampled index. Defaults to `False`. .. versionadded:: 0.45.2
- **climb\_or\_descend\_at\_end** (`bool`) – If true, the climb or descent will be placed at the end of each segment rather than the start. Default is `false` (climb or descent immediately).

### Returns

`Flight` – Filled Flight

### Raises

`ValueError` – Unknown `fill_method`

### Examples

```
>>> from datetime import datetime
>>> import pandas as pd
```

```
>>> df = pd.DataFrame()
>>> df['longitude'] = [0, 0, 50]
>>> df['latitude'] = 0
>>> df['altitude'] = 0
>>> df['time'] = [datetime(2020, 1, 1, h) for h in range(3)]
```

```
>>> fl = Flight(df)
>>> fl.dataframe
  longitude  latitude  altitude                time
         0         0.0         0.0  0.0 2020-01-01 00:00:00
```

(continues on next page)

(continued from previous page)

|   |      |     |     |                     |
|---|------|-----|-----|---------------------|
| 1 | 0.0  | 0.0 | 0.0 | 2020-01-01 01:00:00 |
| 2 | 50.0 | 0.0 | 0.0 | 2020-01-01 02:00:00 |

```
>>> fl.resample_and_fill('10min').dataframe # resample with 10 minute frequency
   longitude  latitude  altitude  time
0  0.000000    0.0      0.0 2020-01-01 00:00:00
1  0.000000    0.0      0.0 2020-01-01 00:10:00
2  0.000000    0.0      0.0 2020-01-01 00:20:00
3  0.000000    0.0      0.0 2020-01-01 00:30:00
4  0.000000    0.0      0.0 2020-01-01 00:40:00
5  0.000000    0.0      0.0 2020-01-01 00:50:00
6  0.000000    0.0      0.0 2020-01-01 01:00:00
7  8.333333    0.0      0.0 2020-01-01 01:10:00
8  16.666667   0.0      0.0 2020-01-01 01:20:00
9  25.000000   0.0      0.0 2020-01-01 01:30:00
10 33.333333   0.0      0.0 2020-01-01 01:40:00
11 41.666667   0.0      0.0 2020-01-01 01:50:00
12 50.000000   0.0      0.0 2020-01-01 02:00:00
```

**segment\_angle()**

Calculate sine and cosine for the angle between each segment and the longitudinal axis.

This is different from the usual navigational angle between two points known as *bearing*.

*Bearing* in 3D spherical coordinates is referred to as *azimuth*.

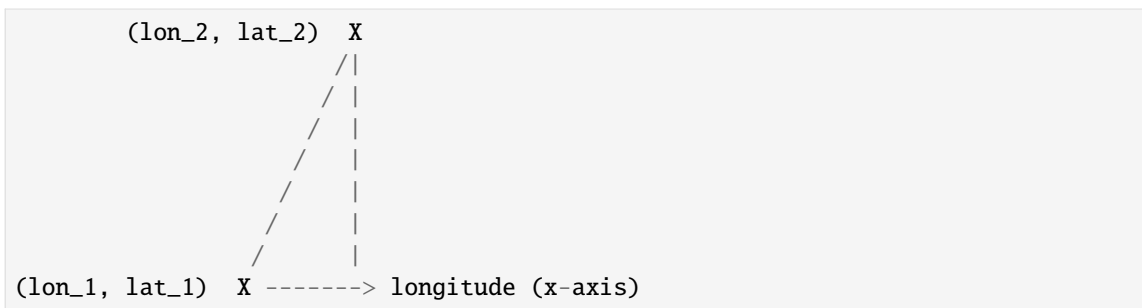

**Returns**

`npt.NDArray[np.float64], npt.NDArray[np.float64]` – Returns  $\sin(a)$ ,  $\cos(a)$ , where  $a$  is the angle between the segment and the longitudinal axis. The final values are of both arrays are `np.nan`.

**See also:**

`geo.segment_angle()`, `units.heading_to_longitudinal_angle()`, `segment_azimuth()`, `geo.forward_azimuth()`



## Examples

```
>>> from pycontrails import Flight
>>> fl = Flight(
... longitude=np.array([1, 2, 3, 5, 8]),
... latitude=np.arange(5),
... altitude=np.full(shape=(5,), fill_value=11000),
... time=pd.date_range('2021-01-01T12', '2021-01-01T14', periods=5),
... )
>>> sin, cos = fl.segment_angle()
>>> sin
array([0.70716063, 0.70737598, 0.44819424, 0.31820671,      nan])
```

```
>>> cos
array([0.70705293, 0.70683748, 0.8939362 , 0.94802136,      nan])
```

### `segment_azimuth()`

Calculate (forward) azimuth at each waypoint.

Method calls `pyproj.Geod.inv`, which is slow. See `geo.forward_azimuth` for an outline of a faster implementation.

Changed in version 0.33.7: The dtype of the output now matches the dtype of `self["longitude"]`.

#### Returns

`npt.NDArray[np.float64]` – Array of azimuths.

#### See also:

`segment_angle()`, `geo.forward_azimuth()`

### `segment_duration(dtype=<class 'numpy.float32'>)`

Compute time elapsed between waypoints in seconds.

`np.nan` appended so the length of the output is the same as number of waypoints.

#### Parameters

**dtype** (`np.dtype`) – Numpy dtype for time difference. Defaults to `np.float64`

#### Returns

`npt.NDArray[np.float64]` – Time difference between waypoints, [s]. Returns an array with dtype specified by ``dtype``

### `segment_airspeed(smooth=False, window_length=7, polyorder=1)`

Return groundspeed across segments.

Calculate by dividing the horizontal segment length by the difference in waypoint times.

#### Parameters

- **smooth** (`bool`, *optional*) – Smooth airspeed with Savitzky-Golay filter. Defaults to `False`.
- **window\_length** (`int`, *optional*) – Passed directly to `scipy.signal.savgol_filter()`, by default 7.
- **polyorder** (`int`, *optional*) – Passed directly to `scipy.signal.savgol_filter()`, by default 1.

#### Returns

`npt.NDArray[np.float64]` – Groundspeed of the segment, [ $ms^{-1}$ ]

**segment\_haversine()**

Compute Haversine (great circle) distance between flight waypoints.

Helper function used in *resample\_and\_fill()*. *np.nan* appended so the length of the output is the same as number of waypoints.

To account for vertical displacements when computing segment lengths, use *segment\_length()*.

**Returns**

`npt.NDArray[np.float64]` – Array of great circle distances in [*m*] between waypoints

**Raises**

**NotImplementedError** – Raises when `attr:attrs["crs"]` is not EPSG:4326

**Examples**

```
>>> from pycontrails import Flight
>>> fl = Flight(
... longitude=np.array([1, 2, 3, 5, 8]),
... latitude=np.arange(5),
... altitude=np.full(shape=(5,), fill_value=11000),
... time=pd.date_range('2021-01-01T12', '2021-01-01T14', periods=5),
... )
>>> fl.segment_haversine()
array([157255.03346286, 157231.08336815, 248456.48781503, 351047.44358851,
       nan])
```

**See also:**

*segment\_haversine()*, *segment\_length()*

**segment\_length()**

Compute spherical distance between flight waypoints.

Helper function used in *length()* and *length\_met()*. *np.nan* appended so the length of the output is the same as number of waypoints.

**Returns**

`npt.NDArray[np.float64]` – Array of distances in [*m*] between waypoints

**Raises**

**NotImplementedError** – Raises when `attr:attrs["crs"]` is not EPSG:4326

**Examples**

```
>>> from pycontrails import Flight
>>> fl = Flight(
... longitude=np.array([1, 2, 3, 5, 8]),
... latitude=np.arange(5),
... altitude=np.full(shape=(5,), fill_value=11000),
... time=pd.date_range('2021-01-01T12', '2021-01-01T14', periods=5),
... )
>>> fl.segment_length()
array([157255.03346286, 157231.08336815, 248456.48781503, 351047.44358851,
       nan])
```

See also:

[`segment\_length\(\)`](#)

**segment\_mach\_number**(*true\_airspeed*, *air\_temperature*)

Calculate the mach number of each segment.

**Parameters**

- **true\_airspeed** (`npt.NDArray[np.float64]`) – True airspeed of the segment, [ $m\ s^{-1}$ ]. See [`segment\_true\_airspeed\(\)`](#).
- **air\_temperature** (`npt.NDArray[np.float64]`) – Average air temperature of each segment, [ $K$ ]

**Returns**

`npt.NDArray[np.float64]` – Mach number of each segment

**segment\_phase**(*threshold\_rocd=250.0*, *min\_cruise\_altitude\_ft=20000.0*)

Identify the phase of flight (climb, cruise, descent) for each segment.

**Parameters**

- **threshold\_rocd** (`float`, *optional*) – ROCD threshold to identify climb and descent, [ $ft\ min^{-1}$ ]. Currently set to 250 ft/min.
- **min\_cruise\_altitude\_ft** (`float`, *optional*) – Minimum altitude for cruise, [ $ft$ ] This is specific for each aircraft type, and can be approximated as 50% of the altitude ceiling. Defaults to 20000 ft.

**Returns**

`npt.NDArray[np.uint8]` – Array of values enumerating the flight phase. See `flight.FlightPhase` for enumeration.

See also:

[`FlightPhase`](#), [`segment\_phase\(\)`](#), [`segment\_rocd\(\)`](#)

**segment\_rocd()**

Calculate the rate of climb and descent (ROCD).

**Returns**

`npt.NDArray[np.float64]` – Rate of climb and descent over segment, [ $ft\ min^{-1}$ ]

See also:

[`segment\_rocd\(\)`](#)

**segment\_true\_airspeed**(*u\_wind=0.0*, *v\_wind=0.0*, *smooth=True*, *window\_length=7*, *polyorder=1*)

Calculate the true airspeed [ $m/s$ ] from the ground speed and horizontal winds.

The calculated ground speed will first be smoothed with a Savitzky-Golay filter if enabled.

**Parameters**

- **u\_wind** (`npt.NDArray[np.float64] | float`) – U wind speed, [ $m\ s^{-1}$ ]. Defaults to 0 for all waypoints.
- **v\_wind** (`npt.NDArray[np.float64] | float`) – V wind speed, [ $m\ s^{-1}$ ]. Defaults to 0 for all waypoints.
- **smooth** (`bool`, *optional*) – Smooth airspeed with Savitzky-Golay filter. Defaults to True.
- **window\_length** (`int`, *optional*) – Passed directly to `scipy.signal.savgol_filter()`, by default 7.

- **polyorder** (*int, optional*) – Passed directly to `scipy.signal.savgol_filter()`, by default 1.

**Returns**

`npt.NDArray[np.float64]` – True wind speed of each segment, [ $m\ s^{-1}$ ]

**sort(*by*)**

Sort data by key(s).

This method always creates a copy of the data by calling `pandas.DataFrame.sort_values()`.

**Parameters**

**by** (*str | list[str]*) – Key or list of keys to sort by.

**Returns**

`VectorDatasetType` – Instance with sorted data.

**property time\_end**

Last waypoint time.

**Returns**

`pandas.Timestamp` – Last waypoint time

**property time\_start**

First waypoint time.

**Returns**

`pandas.Timestamp` – First waypoint time

**to\_geojson\_linestring()**

Return trajectory as geojson FeatureCollection containing single LineString.

**Returns**

`dict[str, Any]` – Python representation of geojson FeatureCollection

**to\_geojson\_multilinestring(*key, split\_antimeridian=True*)**

Return trajectory as GeoJSON FeatureCollection of MultiLineStrings.

Flight data is grouped according to values of *key*. Each group gives rise to a Feature containing a Multi-LineString geometry. LineStrings can be split over the antimeridian.

**Parameters**

- **key** (*str*) – Name of data column to group by
- **split\_antimeridian** (*bool, optional*) – Split linestrings that cross the antimeridian. Defaults to True

**Returns**

`dict[str, Any]` – Python representation of GeoJSON FeatureCollection of MultiLineString Features

**Raises**

**KeyError** – data does not contain column key

**to\_traffic()**

Convert Flight instance to `traffic.core.Flight` instance.

See <https://traffic-viz.github.io/traffic.core.flight.html#traffic.core.Flight>

**Returns**

`traffic.core.Flight` – `traffic.core.Flight` instance

**Raises****ModuleNotFoundError** – *traffic* package not installed**pycontrails.Fleet**

```
class pycontrails.Fleet(data=None, *, longitude=None, latitude=None, altitude=None, altitude_ft=None,
                        level=None, time=None, attrs=None, copy=True, fuel=None, fl_attrs=None,
                        **attrs_kwargs)
```

Bases: *Flight*Data structure for holding a sequence of *Flight* instances.Flight waypoints are merged into a single *Flight*-like object.

```
__init__(data=None, *, longitude=None, latitude=None, altitude=None, altitude_ft=None, level=None,
         time=None, attrs=None, copy=True, fuel=None, fl_attrs=None, **attrs_kwargs)
```

**Methods**

|                                                                     |                                                                                        |
|---------------------------------------------------------------------|----------------------------------------------------------------------------------------|
| <code>T_isa()</code>                                                | Calculate the ICAO standard atmosphere temperature at each point.                      |
| <code><b>__init__</b>([data, longitude, latitude, ...])</code>      |                                                                                        |
| <code>broadcast_attrs(keys[, overwrite, raise_error])</code>        | Attach values from <i>keys</i> in <i>attrs</i> onto <i>data</i> .                      |
| <code>broadcast_numeric_attrs([ignore_keys, overwrite])</code>      | Attach numeric values in <i>attrs</i> onto <i>data</i> .                               |
| <code><i>clean_and_resample</i>([freq, fill_method, ...])</code>    | Resample and (possibly) filter a flight trajectory.                                    |
| <code>coords_intersect_met(met)</code>                              | Return boolean mask of data inside the bounding box defined by <i>met</i> .            |
| <code><i>copy</i>(**kwargs)</code>                                  | Return a copy of this <i>VectorDatasetType</i> class.                                  |
| <code>create_empty([keys, attrs])</code>                            | Create instance with variables defined by <i>keys</i> and size 0.                      |
| <code>distance_to_coords(distance)</code>                           | Convert distance along flight path to geodesic coordinates.                            |
| <code>downselect_met(met, *[, longitude_buffer, ...])</code>        | Downselect <i>met</i> to encompass a spatiotemporal region of the data.                |
| <code>ensure_vars(vars[, raise_error])</code>                       | Ensure variables exist in column of <i>data</i> or <i>attrs</i> .                      |
| <code><i>filter</i>(mask[, copy])</code>                            | Filter data according to a boolean array mask.                                         |
| <code>filter_altitude([kernel_size, cruise_threshold])</code>       | Filter noisy altitude on a single flight.                                              |
| <code>filter_by_first()</code>                                      | Keep first row of group of waypoints with identical coordinates.                       |
| <code>from_dict(obj[, copy])</code>                                 | Create instance from dict representation containing <i>data</i> and <i>attrs</i> .     |
| <code><i>from_seq</i>(seq[, broadcast_numeric, copy, attrs])</code> | Instantiate a <i>Fleet</i> instance from an iterable of <i>Flight</i> .                |
| <code>generate_splits(n_splits[, copy])</code>                      | Split instance into <i>n_split</i> sub-vectors.                                        |
| <code>get(key[, default_value])</code>                              | Get values from <i>data</i> with <i>default_value</i> if key not in <i>data</i> .      |
| <code>get_data_or_attr(key[, default])</code>                       | Get value from <i>data</i> or <i>attrs</i> .                                           |
| <code>intersect_met(mda, *[, longitude, latitude, ...])</code>      | Intersect waypoints with <i>MetDataArray</i> .                                         |
| <code>length_met(key[, threshold])</code>                           | Calculate total horizontal distance where column <i>key</i> exceeds <i>threshold</i> . |

continues on next page

Table 2 – continued from previous page

|                                                           |                                                                                         |
|-----------------------------------------------------------|-----------------------------------------------------------------------------------------|
| <code>plot(**kwargs)</code>                               | Plot flight trajectory longitude-latitude values.                                       |
| <code>proportion_met(key[, threshold])</code>             | Calculate proportion of flight with certain meteorological constraint.                  |
| <code>resample_and_fill(*args, **kwargs)</code>           | Resample and fill flight trajectory with geodesics and linear interpolation.            |
| <code>segment_angle()</code>                              | Calculate sine and cosine for the angle between each segment and the longitudinal axis. |
| <code>segment_azimuth()</code>                            | Calculate (forward) azimuth at each waypoint.                                           |
| <code>segment_duration([dtype])</code>                    | Compute time elapsed between waypoints in seconds.                                      |
| <code>segment_groundspeed(*args, **kwargs)</code>         | Return groundspeed across segments.                                                     |
| <code>segment_haversine()</code>                          | Compute Haversine (great circle) distance between flight waypoints.                     |
| <code>segment_length()</code>                             | Compute spherical distance between flight waypoints.                                    |
| <code>segment_mach_number(true_airspeed, ...)</code>      | Calculate the mach number of each segment.                                              |
| <code>segment_phase([threshold_rocd, ...])</code>         | Identify the phase of flight (climb, cruise, descent) for each segment.                 |
| <code>segment_rocd()</code>                               | Calculate the rate of climb and descent (ROCD).                                         |
| <code>segment_true_airspeed([u_wind, v_wind, ...])</code> | Calculate the true airspeed [ $m/s$ ] from the ground speed and horizontal winds.       |
| <code>select(keys[, copy])</code>                         | Return new class instance only containing specified keys.                               |
| <code>setdefault(key[, default])</code>                   | Shortcut to <code>VectorDataDict.setdefault()</code> .                                  |
| <code>sort(by)</code>                                     | Sort data by key(s).                                                                    |
| <code>sum(vectors[, infer_attrs, fill_value])</code>      | Sum a list of <code>VectorDataset</code> instances.                                     |
| <code>to_dataframe([copy])</code>                         | Create <code>pd.DataFrame</code> in which each key-value pair in data is a column.      |
| <code>to_dict()</code>                                    | Create dictionary with data and attrs.                                                  |
| <code>to_flight_list([copy])</code>                       | De-concatenate merged waypoints into a list of Flight instances.                        |
| <code>to_geojson_linestring()</code>                      | Return trajectory as geojson FeatureCollection containing single LineString.            |
| <code>to_geojson_multilinestring(key[, ...])</code>       | Return trajectory as GeoJSON FeatureCollection of MultiLineStrings.                     |
| <code>to_geojson_points()</code>                          | Return dataset as GeoJSON FeatureCollection of Points.                                  |
| <code>to_lon_lat_grid(agg, *[, spatial_bbox, ...])</code> | Convert vectors to a longitude-latitude grid.                                           |
| <code>to_pseudo_mercator([copy])</code>                   | Convert data from <code>attrs["crs"]</code> to Pseudo Mercator (EPSG:3857).             |
| <code>to_traffic()</code>                                 | Convert Flight instance to <code>traffic.core.Flight</code> instance.                   |
| <code>transform_crs(crs[, copy])</code>                   | Transform trajectory data from one coordinate reference system (CRS) to another.        |
| <code>update([other])</code>                              | Update values in data dict without warning if overwriting.                              |

## Attributes

|                         |                                                                                         |
|-------------------------|-----------------------------------------------------------------------------------------|
| <i>fl_attrs</i>         |                                                                                         |
| <i>final_waypoints</i>  |                                                                                         |
| air_pressure            | Get air_pressure values for points.                                                     |
| altitude                | Get altitude.                                                                           |
| altitude_ft             | Get altitude in feet.                                                                   |
| attrs                   | Generic dataset attributes                                                              |
| constants               | Return a dictionary of constant attributes and data values.                             |
| coords                  | Get geospatial coordinates for compatibility with MetdataArray.                         |
| data                    | Vector data with labels as keys and <code>numpy.ndarray</code> as values                |
| dataframe               | Shorthand property to access <code>to_dataframe()</code> with <code>copy=False</code> . |
| duration                | Determine flight duration.                                                              |
| fuel                    | Fuel used in flight trajectory                                                          |
| hash                    | Generate a unique hash for this class instance.                                         |
| length                  | Return flight length based on WGS84 geodesic.                                           |
| level                   | Get pressure level values for points.                                                   |
| <i>max_distance_gap</i> | Return maximum distance gap between waypoints along flight trajectory.                  |
| max_time_gap            | Return maximum time gap between waypoints along flight trajectory.                      |
| <i>n_flights</i>        | Return number of distinct flights.                                                      |
| required_keys           | Required keys for creating GeoVectorDataset                                             |
| shape                   | Shape of each array in data.                                                            |
| size                    | Length of each array in data.                                                           |
| time_end                | Last waypoint time.                                                                     |
| time_start              | First waypoint time.                                                                    |
| vertical_keys           | At least one of these vertical-coordinate keys must also be included                    |

**clean\_and\_resample**(*freq='1min', fill\_method='geodesic', geodesic\_threshold=100000.0, nominal\_rocd=0.0, kernel\_size=17, cruise\_threshold=120, force\_filter=False, drop=True, keep\_original\_index=False, climb\_descend\_at\_end=False*)

Resample and (possibly) filter a flight trajectory.

Waypoints are resampled according to the frequency `freq`. If the original flight data has a short sampling period, `filter_altitude` will also be called to clean the data. Large gaps in trajectories may be interpolated as step climbs through `_altitude_interpolation`.

### Parameters

- **freq** (`str`, *optional*) – Resampling frequency, by default “1min”
- **fill\_method** (`{"geodesic", "linear"}`, *optional*) – Choose between "geodesic" and "linear", by default "geodesic". In geodesic mode, large gaps between waypoints are filled with geodesic interpolation and small gaps are filled with linear interpolation. In linear mode, all gaps are filled with linear interpolation.

- **geodesic\_threshold** (*float, optional*) – Threshold for geodesic interpolation, [*m*]. If the distance between consecutive waypoints is under this threshold, values are interpolated linearly.
- **nominal\_rocd** (*float, optional*) – Nominal rate of climb / descent for aircraft type. Defaults to `constants.nominal_rocd`.
- **kernel\_size** (*int, optional*) – Passed directly to `scipy.signal.medfilt()`, by default 11. Passed also to `scipy.signal.medfilt()`
- **cruise\_theshold** (*float, optional*) – Minimal length of time, in seconds, for a flight to be in cruise to apply median filter
- **force\_filter** (*bool, optional*) – If set to true, meth:*filter\_altitude* will always be called. otherwise, it will only be called if the flight has a median sample period under 10 seconds
- **drop** (*bool, optional*) – Drop any columns that are not resampled and filled. Defaults to True, dropping all keys outside of “time”, “latitude”, “longitude” and “altitude”. If set to False, the extra keys will be kept but filled with nan or None values, depending on the data type.
- **keep\_original\_index** (*bool, optional*) – Keep the original index of the *Flight* in addition to the new resampled index. Defaults to False. .. versionadded:: 0.45.2
- **climb\_or\_descend\_at\_end** (*bool*) – If true, the climb or descent will be placed at the end of each segment rather than the start. Default is false (climb or descent immediately).

**Returns***Flight* – Filled Flight**copy**(*\*\*kwargs*)

Return a copy of this VectorDatasetType class.

**Parameters****\*\*kwargs** (Any) – Additional keyword arguments passed into the constructor of the returned class.**Returns**

VectorDatasetType – Copy of class

**filter**(*mask, copy=True, \*\*kwargs*)

Filter data according to a boolean array mask.

Entries corresponding to `mask == True` are kept.**Parameters**

- **mask** (`npt.NDArray[np.bool_]`) – Boolean array with compatible shape.
- **copy** (*bool, optional*) – Copy data on filter. Defaults to True. See [numpy best practices](#) for insight into whether copy is appropriate.
- **\*\*kwargs** (Any) – Additional keyword arguments passed into the constructor of the returned class.

**Returns**

VectorDatasetType – Containing filtered data

**Raises****TypeError** – If mask is not a boolean array.**final\_waypoints**



**fl\_attrs**

**classmethod** `from_seq(seq, broadcast_numeric=True, copy=True, attrs=None)`

Instantiate a *Fleet* instance from an iterable of *Flight*.

Changed in version 0.49.3: Empty flights are now filtered out before concatenation.

**Parameters**

- `seq` (`Iterable[Flight]`) – An iterable of *Flight* instances.
- `broadcast_numeric` (`bool`, *optional*) – If True, broadcast numeric attributes to data variables.
- `copy` (`bool`, *optional*) – If True, make copy of each flight instance in `seq`.
- `attrs` (`dict[str, Any] | None`, *optional*) – Global attribute to attach to instance.

**Returns**

*Fleet* – A *Fleet* instance made from concatenating the *Flight* instances in `seq`. The fuel type is taken from the first *Flight* in `seq`.

**property** `max_distance_gap`

Return maximum distance gap between waypoints along flight trajectory.

Distance is calculated based on WGS84 geodesic.

**Returns**

`float` – Maximum distance between waypoints, [*m*]

**Raises**

`NotImplementedError` – Raises when `attr:attrs["crs"]` is not EPSG:4326

**Examples**

```
>>> import numpy as np
>>> fl = Flight(
...     longitude=np.linspace(20, 30, 200),
...     latitude=np.linspace(40, 30, 200),
...     altitude=11000 * np.ones(200),
...     time=pd.date_range('2021-01-01T12', '2021-01-01T14', periods=200),
... )
>>> fl.max_distance_gap
7391.27...
```

**property** `n_flights`

Return number of distinct flights.

**Returns**

`int` – Number of flights

**resample\_and\_fill(\*args, \*\*kwargs)**

Resample and fill flight trajectory with geodesics and linear interpolation.

Waypoints are resampled according to the frequency `freq`. Values for data columns `longitude`, `latitude`, and `altitude` are interpolated.

Resampled waypoints will include all multiples of `freq` between the flight start and end time. For example, when resampling to a frequency of 1 minute, a flight that starts at 2020/1/1 00:00:59 and ends at 2020/1/1

00:01:01 will return a single waypoint at 2020/1/1 00:01:00, whereas a flight that starts at 2020/1/1 00:01:01 and ends at 2020/1/1 00:01:59 will return an empty flight.

### Parameters

- **freq** (*str, optional*) – Resampling frequency, by default “1min”
- **fill\_method** (*{“geodesic”, “linear”}, optional*) – Choose between “geodesic” and “linear”, by default “geodesic”. In geodesic mode, large gaps between waypoints are filled with geodesic interpolation and small gaps are filled with linear interpolation. In linear mode, all gaps are filled with linear interpolation.
- **geodesic\_threshold** (*float, optional*) – Threshold for geodesic interpolation, [*m*]. If the distance between consecutive waypoints is under this threshold, values are interpolated linearly.
- **nominal\_rocd** (*float | None, optional*) – Nominal rate of climb / descent for aircraft type. Defaults to `constants.nominal_rocd`.
- **drop** (*bool, optional*) – Drop any columns that are not resampled and filled. Defaults to True, dropping all keys outside of “time”, “latitude”, “longitude” and “altitude”. If set to False, the extra keys will be kept but filled with nan or None values, depending on the data type.
- **keep\_original\_index** (*bool, optional*) – Keep the original index of the *Flight* in addition to the new resampled index. Defaults to False. .. versionadded:: 0.45.2
- **climb\_or\_descend\_at\_end** (*bool*) – If true, the climb or descent will be placed at the end of each segment rather than the start. Default is false (climb or descent immediately).

### Returns

*Flight* – Filled Flight

### Raises

**ValueError** – Unknown fill\_method

### Examples

```
>>> from datetime import datetime
>>> import pandas as pd
```

```
>>> df = pd.DataFrame()
>>> df['longitude'] = [0, 0, 50]
>>> df['latitude'] = 0
>>> df['altitude'] = 0
>>> df['time'] = [datetime(2020, 1, 1, h) for h in range(3)]
```

```
>>> fl = Flight(df)
>>> fl.dataframe
  longitude  latitude  altitude          time
0         0         0.0        0.0  0.0 2020-01-01 00:00:00
1         0         0.0        0.0  0.0 2020-01-01 01:00:00
2        50         0.0        0.0  0.0 2020-01-01 02:00:00
```

```
>>> fl.resample_and_fill('10min').dataframe # resample with 10 minute frequency
  longitude  latitude  altitude          time
```

(continues on next page)

(continued from previous page)

|    |           |     |     |                     |
|----|-----------|-----|-----|---------------------|
| 0  | 0.000000  | 0.0 | 0.0 | 2020-01-01 00:00:00 |
| 1  | 0.000000  | 0.0 | 0.0 | 2020-01-01 00:10:00 |
| 2  | 0.000000  | 0.0 | 0.0 | 2020-01-01 00:20:00 |
| 3  | 0.000000  | 0.0 | 0.0 | 2020-01-01 00:30:00 |
| 4  | 0.000000  | 0.0 | 0.0 | 2020-01-01 00:40:00 |
| 5  | 0.000000  | 0.0 | 0.0 | 2020-01-01 00:50:00 |
| 6  | 0.000000  | 0.0 | 0.0 | 2020-01-01 01:00:00 |
| 7  | 8.333333  | 0.0 | 0.0 | 2020-01-01 01:10:00 |
| 8  | 16.666667 | 0.0 | 0.0 | 2020-01-01 01:20:00 |
| 9  | 25.000000 | 0.0 | 0.0 | 2020-01-01 01:30:00 |
| 10 | 33.333333 | 0.0 | 0.0 | 2020-01-01 01:40:00 |
| 11 | 41.666667 | 0.0 | 0.0 | 2020-01-01 01:50:00 |
| 12 | 50.000000 | 0.0 | 0.0 | 2020-01-01 02:00:00 |

**segment\_angle()**

Calculate sine and cosine for the angle between each segment and the longitudinal axis.

This is different from the usual navigational angle between two points known as *bearing*.

*Bearing* in 3D spherical coordinates is referred to as *azimuth*.

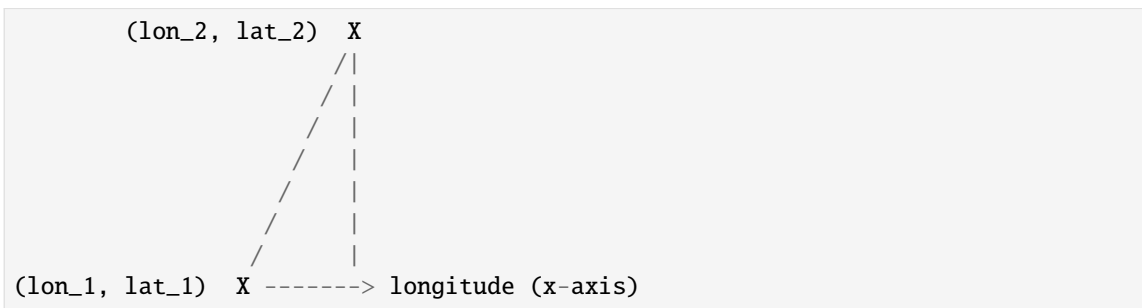**Returns**

`npt.NDArray[np.float64]`, `npt.NDArray[np.float64]` – Returns  $\sin(a)$ ,  $\cos(a)$ , where  $a$  is the angle between the segment and the longitudinal axis. The final values are of both arrays are `np.nan`.

**See also:**

`geo.segment_angle()`, `units.heading_to_longitudinal_angle()`, `segment_azimuth()`, `geo.forward_azimuth()`

**Examples**

```
>>> from pycontrails import Flight
>>> fl = Flight(
... longitude=np.array([1, 2, 3, 5, 8]),
... latitude=np.arange(5),
... altitude=np.full(shape=(5,), fill_value=11000),
... time=pd.date_range('2021-01-01T12', '2021-01-01T14', periods=5),
... )
>>> sin, cos = fl.segment_angle()
```

(continues on next page)

(continued from previous page)

```
>>> sin
array([0.70716063, 0.70737598, 0.44819424, 0.31820671, nan])
```

```
>>> cos
array([0.70705293, 0.70683748, 0.8939362 , 0.94802136, nan])
```

**segment\_azimuth()**

Calculate (forward) azimuth at each waypoint.

Method calls `pyproj.Geod.inv`, which is slow. See `geo.forward_azimuth` for an outline of a faster implementation.

Changed in version 0.33.7: The dtype of the output now matches the dtype of `self["longitude"]`.

**Returns**

`npt.NDArray[np.float64]` – Array of azimuths.

**See also:**

`segment_angle()`, `geo.forward_azimuth()`

**segment\_groundspeed(\*args, \*\*kwargs)**

Return groundspeed across segments.

Calculate by dividing the horizontal segment length by the difference in waypoint times.

**Parameters**

- **smooth** (`bool`, *optional*) – Smooth airspeed with Savitzky-Golay filter. Defaults to `False`.
- **window\_length** (`int`, *optional*) – Passed directly to `scipy.signal.savgol_filter()`, by default 7.
- **polyorder** (`int`, *optional*) – Passed directly to `scipy.signal.savgol_filter()`, by default 1.

**Returns**

`npt.NDArray[np.float64]` – Groundspeed of the segment, [ $m s^{-1}$ ]

**segment\_length()**

Compute spherical distance between flight waypoints.

Helper function used in `length()` and `length_met()`. `np.nan` appended so the length of the output is the same as number of waypoints.

**Returns**

`npt.NDArray[np.float64]` – Array of distances in [ $m$ ] between waypoints

**Raises**

**NotImplementedError** – Raises when `attr:attrs["crs"]` is not EPSG:4326

## Examples

```
>>> from pycontrails import Flight
>>> fl = Flight(
... longitude=np.array([1, 2, 3, 5, 8]),
... latitude=np.arange(5),
... altitude=np.full(shape=(5,), fill_value=11000),
... time=pd.date_range('2021-01-01T12', '2021-01-01T14', periods=5),
... )
>>> fl.segment_length()
array([157255.03346286, 157231.08336815, 248456.48781503, 351047.44358851,
       nan])
```

### See also:

[`segment\_length\(\)`](#)

**segment\_true\_airspeed**(*u\_wind=0.0, v\_wind=0.0, smooth=True, window\_length=7, polyorder=1*)

Calculate the true airspeed [*m/s*] from the ground speed and horizontal winds.

Because `Flight.segment_true_airspeed` uses a smoothing pattern, waypoints in data are not independent. Moreover, we expect the final waypoint of each flight to have a nan value associated to any segment property. Consequently, we need to define a custom method here to deal with these issues when applying this method on a fleet of flights.

See docstring for `Flight.segment_true_airspeed()`.

### Raises

**RuntimeError** – Unexpected key `__u_wind` or `__v_wind` found in data.

**sort**(*by*)

Sort data by key(s).

This method always creates a copy of the data by calling `pandas.DataFrame.sort_values()`.

### Parameters

**by** (*str | list[str]*) – Key or list of keys to sort by.

### Returns

`VectorDatasetType` – Instance with sorted data.

**to\_flight\_list**(*copy=True*)

De-concatenate merged waypoints into a list of Flight instances.

Any global attrs are lost.

### Parameters

**copy** (*bool, optional*) – If True, make copy of each flight instance in *seq*.

### Returns

`list[Flight]` – List of Flights in the same order as was passed into the *Fleet* instance.

## pycontrails.FlightPhase

**class** pycontrails.FlightPhase(*value, names=None, \*, module=None, qualname=None, type=None, start=1, boundary=None*)

Bases: `IntEnum`

Flight phase enumeration.

Use `segment_phase()` or `Flight.segment_phase()` to determine flight phase.

`__init__(*args, **kwargs)`

### Methods

|                                                    |                                                                            |
|----------------------------------------------------|----------------------------------------------------------------------------|
| <code>__init__(*args, **kwargs)</code>             |                                                                            |
| <code>as_integer_ratio()</code>                    | Return integer ratio.                                                      |
| <code>bit_count()</code>                           | Number of ones in the binary representation of the absolute value of self. |
| <code>bit_length()</code>                          | Number of bits necessary to represent self in binary.                      |
| <code>conjugate</code>                             | Returns self, the complex conjugate of any int.                            |
| <code>from_bytes([byteorder, signed])</code>       | Return the integer represented by the given array of bytes.                |
| <code>to_bytes([length, byteorder, signed])</code> | Return an array of bytes representing an integer.                          |

### Attributes

|                           |                                                                            |
|---------------------------|----------------------------------------------------------------------------|
| <code>CLIMB</code>        | Waypoints at which the flight is in a climb phase                          |
| <code>CRUISE</code>       | Waypoints at which the flight is in a cruise phase                         |
| <code>DESCENT</code>      | Waypoints at which the flight is in a descent phase                        |
| <code>LEVEL_FLIGHT</code> | Waypoints at which the flight is not in a climb, cruise, or descent phase. |
| <code>NAN</code>          | Waypoints at which the ROCD is not defined.                                |
| <code>denominator</code>  | the denominator of a rational number in lowest terms                       |
| <code>imag</code>         | the imaginary part of a complex number                                     |
| <code>numerator</code>    | the numerator of a rational number in lowest terms                         |
| <code>real</code>         | the real part of a complex number                                          |

**CLIMB = 1**

Waypoints at which the flight is in a climb phase

**CRUISE = 2**

Waypoints at which the flight is in a cruise phase

**DESCENT = 3**

Waypoints at which the flight is in a descent phase

**LEVEL\_FLIGHT = 4**

Waypoints at which the flight is not in a climb, cruise, or descent phase. In practice, this category is used for waypoints at which the ROCD resembles that of a cruise phase, but the altitude is below the minimum cruise altitude.

**NAN = 5**

Waypoints at which the ROCD is not defined.

## pycontrails.Fuel

**class** pycontrails.Fuel(*fuel\_name, q\_fuel, hydrogen\_content, ei\_co2, ei\_h2o, ei\_so2, ei\_sulphates, ei\_oc*)

Bases: `object`

Base class for the physical parameters of the fuel.

`__init__`(*fuel\_name, q\_fuel, hydrogen\_content, ei\_co2, ei\_h2o, ei\_so2, ei\_sulphates, ei\_oc*)

## Methods

`__init__`(*fuel\_name, q\_fuel, ...*)

## Attributes

|                         |                                                                                                   |
|-------------------------|---------------------------------------------------------------------------------------------------|
| <i>fuel_name</i>        | Fuel Name                                                                                         |
| <i>q_fuel</i>           | Lower calorific value (LCV) of fuel, [ $J \text{ kg}_{fuel}^{-1}$ ]                               |
| <i>hydrogen_content</i> | Percentage of hydrogen mass content in the fuel                                                   |
| <i>ei_co2</i>           | CO2 emissions index for fuel, [ $\text{kg}_{CO_2} \text{ kg}_{fuel}^{-1}$ ]                       |
| <i>ei_h2o</i>           | Water vapour emissions index for fuel, [ $\text{kg}_{H_2O} \text{ kg}_{fuel}^{-1}$ ]              |
| <i>ei_so2</i>           | Sulphur oxide, SO2-S gas, emissions index for fuel, [ $\text{kg}_{SO_2} \text{ kg}_{fuel}^{-1}$ ] |
| <i>ei_sulphates</i>     | Sulphates, S(VI)-S particle, emissions index for fuel, [ $\text{kg}_S \text{ kg}_{fuel}^{-1}$ ]   |
| <i>ei_oc</i>            | Organic carbon emissions index for fuel, [ $\text{kg}_{OC} \text{ kg}_{fuel}^{-1}$ ]              |

### *ei\_co2*

CO2 emissions index for fuel, [ $\text{kg}_{CO_2} \text{ kg}_{fuel}^{-1}$ ]

### *ei\_h2o*

Water vapour emissions index for fuel, [ $\text{kg}_{H_2O} \text{ kg}_{fuel}^{-1}$ ]

### *ei\_oc*

Organic carbon emissions index for fuel, [ $\text{kg}_{OC} \text{ kg}_{fuel}^{-1}$ ]

### *ei\_so2*

Sulphur oxide, SO2-S gas, emissions index for fuel, [ $\text{kg}_{SO_2} \text{ kg}_{fuel}^{-1}$ ]

### *ei\_sulphates*

Sulphates, S(VI)-S particle, emissions index for fuel, [ $\text{kg}_S \text{ kg}_{fuel}^{-1}$ ]

**fuel\_name**

Fuel Name

**hydrogen\_content**

Percentage of hydrogen mass content in the fuel

**q\_fuel**

Lower calorific value (LCV) of fuel, [ $J \text{ kg}_{fuel}^{-1}$ ]

**pycontrails.JetA**

```
class pycontrails.JetA(fuel_name='Jet A-1', q_fuel=43130000.0, hydrogen_content=13.8, ei_co2=3.159,
                      ei_h2o=1.23, ei_so2=0.0012, ei_sulphates=2.4489795918367345e-05,
                      ei_oc=1.9999999999999998e-05)
```

Bases: *Fuel*

Jet A-1 Fuel.

**References**

- [Celikel and Jelinek, 2001]
- [Lee *et al.*, 2021]
- [Stettler *et al.*, 2011]
- [Wilkerson *et al.*, 2010]

```
__init__(fuel_name='Jet A-1', q_fuel=43130000.0, hydrogen_content=13.8, ei_co2=3.159, ei_h2o=1.23,
          ei_so2=0.0012, ei_sulphates=2.4489795918367345e-05, ei_oc=1.9999999999999998e-05)
```

**Methods**

```
__init__([fuel_name, q_fuel, ...])
```



## Attributes

|                         |                                                                                                                                                                                                                                                                      |
|-------------------------|----------------------------------------------------------------------------------------------------------------------------------------------------------------------------------------------------------------------------------------------------------------------|
| <i>ei_co2</i>           | CO2 emissions index for fuel, [ $kg_{CO_2} kg_{fuel}^{-1}$ ]                                                                                                                                                                                                         |
| <i>ei_h2o</i>           | Water vapour emissions index for fuel, [ $kg_{H_2O} kg_{fuel}^{-1}$ ]                                                                                                                                                                                                |
| <i>ei_oc</i>            | Organic carbon emissions index for fuel, [ $kg_{OC} kg_{fuel}^{-1}$ ] - High uncertainty - Wilkerson et al. (2010): EI_OC = 15 mg/kg-fuel - Stettler et al. (2011): EI_OC = 20 [1, 40] mg/kg-fuel.                                                                   |
| <i>ei_so2</i>           | Sulphur oxide, SO2-S gas, emissions index for fuel, [ $kg_{SO_2} kg_{fuel}^{-1}$ ] - The EI SO2 is proportional to the fuel sulphur content - Celikel (2001): EI_SO2 = 0.84 g/kg-fuel for 450 ppm fuel - Lee et al. (2021): EI_SO2 = 1.2 g/kg-fuel for 600 ppm fuel. |
| <i>ei_sulphates</i>     | Sulphates, S(VI)-S particle, emissions index for fuel, [ $kg_S kg_{fuel}^{-1}$ ] - The SOx-S is partitioned into 98% SO2-S gas and 2% S(VI)-S particle - References: Wilkerson et al. (2010) & Stettler et al. (2011).                                               |
| <i>fuel_name</i>        | Fuel Name                                                                                                                                                                                                                                                            |
| <i>hydrogen_content</i> | Percentage of hydrogen mass content in the fuel                                                                                                                                                                                                                      |
| <i>q_fuel</i>           | Lower calorific value (LCV) of fuel, [ $J kg_{fuel}^{-1}$ ]                                                                                                                                                                                                          |

**ei\_co2 = 3.159**

CO2 emissions index for fuel, [ $kg_{CO_2} kg_{fuel}^{-1}$ ]

**ei\_h2o = 1.23**

Water vapour emissions index for fuel, [ $kg_{H_2O} kg_{fuel}^{-1}$ ]

**ei\_oc = 1.9999999999999998e-05**

Organic carbon emissions index for fuel, [ $kg_{OC} kg_{fuel}^{-1}$ ] - High uncertainty - Wilkerson et al. (2010): EI\_OC = 15 mg/kg-fuel - Stettler et al. (2011): EI\_OC = 20 [1, 40] mg/kg-fuel

**ei\_so2 = 0.0012**

Sulphur oxide, SO2-S gas, emissions index for fuel, [ $kg_{SO_2} kg_{fuel}^{-1}$ ] - The EI SO2 is proportional to the fuel sulphur content - Celikel (2001): EI\_SO2 = 0.84 g/kg-fuel for 450 ppm fuel - Lee et al. (2021): EI\_SO2 = 1.2 g/kg-fuel for 600 ppm fuel

**ei\_sulphates = 2.4489795918367345e-05**

Sulphates, S(VI)-S particle, emissions index for fuel, [ $kg_S kg_{fuel}^{-1}$ ] - The SOx-S is partitioned into 98% SO2-S gas and 2% S(VI)-S particle - References: Wilkerson et al. (2010) & Stettler et al. (2011)

**fuel\_name = 'Jet A-1'**

Fuel Name

**hydrogen\_content = 13.8**

Percentage of hydrogen mass content in the fuel

**q\_fuel = 43130000.0**

Lower calorific value (LCV) of fuel, [ $J kg_{fuel}^{-1}$ ]

## pycontrails.SAFBlend

**class** pycontrails.SAFBlend(*pct\_blend*)

Bases: *Fuel*

Jet A-1 / Sustainable Aviation Fuel Blend.

SAF only changes the CO2 lifecycle emissions, not the CO2 emissions emitted at the aircraft exhaust. We assume that the EI OC stays the same as Jet A-1 fuel due to lack of data.

### Parameters

**pct\_blend** (*float*) – Sustainable aviation fuel percentage blend ratio by volume, %. Expected to be in the interval [0, 100].

### References

- [Teoh *et al.*, 2022]
- [Schripp *et al.*, 2022]

`__init__`(*pct\_blend*)

### Methods

`__init__`(*pct\_blend*)

### Attributes

|                               |                                                                                                   |
|-------------------------------|---------------------------------------------------------------------------------------------------|
| <code>fuel_name</code>        | Fuel Name                                                                                         |
| <code>q_fuel</code>           | Lower calorific value (LCV) of fuel, [ $J \text{ kg}_{fuel}^{-1}$ ]                               |
| <code>hydrogen_content</code> | Percentage of hydrogen mass content in the fuel                                                   |
| <code>ei_co2</code>           | CO2 emissions index for fuel, [ $\text{kg}_{CO_2} \text{ kg}_{fuel}^{-1}$ ]                       |
| <code>ei_h2o</code>           | Water vapour emissions index for fuel, [ $\text{kg}_{H_2O} \text{ kg}_{fuel}^{-1}$ ]              |
| <code>ei_so2</code>           | Sulphur oxide, SO2-S gas, emissions index for fuel, [ $\text{kg}_{SO_2} \text{ kg}_{fuel}^{-1}$ ] |
| <code>ei_sulphates</code>     | Sulphates, S(VI)-S particle, emissions index for fuel, [ $\text{kg}_S \text{ kg}_{fuel}^{-1}$ ]   |
| <code>ei_oc</code>            | Organic carbon emissions index for fuel, [ $\text{kg}_{OC} \text{ kg}_{fuel}^{-1}$ ]              |

**pycontrails.HydrogenFuel**

```
class pycontrails.HydrogenFuel (fuel_name='Hydrogen', q_fuel=122800000.0, hydrogen_content=nan,
                               ei_co2=0.0, ei_h2o=9.21, ei_so2=0.0, ei_sulphates=0.0, ei_oc=0.0)
```

Bases: *Fuel*

Hydrogen Fuel.

**References**

- [Khan *et al.*, 2022]

```
__init__ (fuel_name='Hydrogen', q_fuel=122800000.0, hydrogen_content=nan, ei_co2=0.0, ei_h2o=9.21,
          ei_so2=0.0, ei_sulphates=0.0, ei_oc=0.0)
```

**Methods**

```
__init__ ([fuel_name, q_fuel, ...])
```

**Attributes**

|                         |                                                                                    |
|-------------------------|------------------------------------------------------------------------------------|
| <i>ei_co2</i>           | CO2 emissions index for fuel, [ $kg_{CO_2} kg_{fuel}^{-1}$ ]                       |
| <i>ei_h2o</i>           | Water vapour emissions index for fuel, [ $kg_{H_2O} kg_{fuel}^{-1}$ ]              |
| <i>ei_oc</i>            | Organic carbon emissions index for fuel, [ $kg_{OC} kg_{fuel}^{-1}$ ]              |
| <i>ei_so2</i>           | Sulphur oxide, SO2-S gas, emissions index for fuel, [ $kg_{SO_2} kg_{fuel}^{-1}$ ] |
| <i>ei_sulphates</i>     | Sulphates, S(VI)-S particle, emissions index for fuel, [ $kg_S kg_{fuel}^{-1}$ ]   |
| <i>fuel_name</i>        | Fuel Name                                                                          |
| <i>hydrogen_content</i> | Percentage of hydrogen mass content in the fuel                                    |
| <i>q_fuel</i>           | Lower calorific value (LCV) of fuel, [ $J kg_{fuel}^{-1}$ ]                        |

**ei\_co2 = 0.0**

CO2 emissions index for fuel, [ $kg_{CO_2} kg_{fuel}^{-1}$ ]

**ei\_h2o = 9.21**

Water vapour emissions index for fuel, [ $kg_{H_2O} kg_{fuel}^{-1}$ ]

**ei\_oc = 0.0**

Organic carbon emissions index for fuel, [ $kg_{OC} kg_{fuel}^{-1}$ ]

**ei\_so2 = 0.0**

Sulphur oxide, SO2-S gas, emissions index for fuel, [ $kg_{SO_2} kg_{fuel}^{-1}$ ]

**ei\_sulphates = 0.0**

Sulphates, S(VI)-S particle, emissions index for fuel, [ $kg_S kg_{fuel}^{-1}$ ]

**fuel\_name = 'Hydrogen'**

Fuel Name

**hydrogen\_content = nan**

Percentage of hydrogen mass content in the fuel

**q\_fuel = 122800000.0**

Lower calorific value (LCV) of fuel, [ $J kg_{fuel}^{-1}$ ]

## 11.2 Datalib

### 11.2.1 ECMWF

|                                                             |                                                                  |
|-------------------------------------------------------------|------------------------------------------------------------------|
| <code>datalib.ecmwf.ERA5</code> (time, variables[, ...])    | Class to support ERA5 data access, download, and organization.   |
| <code>datalib.ecmwf.era5_model_level</code>                 | Model-level ERA5 data access.                                    |
| <code>datalib.ecmwf.HRES</code> (time, variables[, ...])    | Class to support HRES data access, download, and organization.   |
| <code>datalib.ecmwf.hres_model_level</code>                 | Model-level HRES data access from the ECMWF operational archive. |
| <code>datalib.ecmwf.hres.get_forecast_filename</code> (...) | Create forecast filename from ECMWF dissemination products.      |
| <code>datalib.ecmwf.model_levels</code>                     | Utilities for working with ECMWF model-level data.               |
| <code>datalib.ecmwf.IFS</code> (time, variables[, ...])     | ECMWF Integrated Forecasting System (IFS) data source.           |
| <code>datalib.ecmwf.variables</code>                        | ECMWF Parameter Support.                                         |

#### pycontrails.datalib.ecmwf.ERA5

```
class pycontrails.datalib.ecmwf.ERA5(time, variables, pressure_levels=-1, paths=None,
timestep_freq=None, product_type='reanalysis', grid=None,
cachestore=<object object>, url=None, key=None)
```

Bases: ECMWFAPI

Class to support ERA5 data access, download, and organization.

Requires account with [Copernicus Data Portal](#) and local credentials.

API credentials can be stored in a `~/ .cdsapirc` file or as `CDSAPI_URL` and `CDSAPI_KEY` environment variables.

```
export CDSAPI_URL=... export CDSAPI_KEY=...
```

Credentials can also be provided directly `url` and `key` keyword args.

See [cdsapi](#) documentation for more information.

#### Parameters

- **time** (`datalib.TimeInput` | `None`) – The time range for data retrieval, either a single datetime or (start, end) datetime range. Input must be datetime-like or tuple of datetime-like (`datetime`, `pd.Timestamp`, `np.datetime64`) specifying the (start, end) of the date range,

inclusive. Datafiles will be downloaded from CDS for each day to reduce requests. If None, paths must be defined and all time coordinates will be loaded from files.

- **variables** (`datalib.VariableInput`) – Variable name (i.e. “t”, “air\_temperature”, [“air\_temperature, relative\_humidity”])
- **pressure\_levels** (`datalib.PressureLevelInput`, *optional*) – Pressure levels for data, in hPa (mbar) Set to -1 for to download surface level parameters. Defaults to -1.
- **paths** (`str` | `list[str]` | `pathlib.Path` | `list[pathlib.Path]` | `None`, *optional*) – Path to CDS NetCDF files to load manually. Can include glob patterns to load specific files. Defaults to None, which looks for files in the cachestore or CDS.
- **timestep\_freq** (`str`, *optional*) – Manually set the timestep interval within the bounds defined by time. Supports any string that can be passed to `pd.date_range(freq=...)`. By default, this is set to “1h” for reanalysis products and “3h” for ensemble products.
- **product\_type** (`str`, *optional*) – Product type, one of “reanalysis”, “ensemble\_mean”, “ensemble\_members”, “ensemble\_spread”
- **grid** (`float`, *optional*) – Specify latitude/longitude grid spacing in data. By default, this is set to 0.25 for reanalysis products and 0.5 for ensemble products.
- **cachestore** (`cache.CacheStore` | `None`, *optional*) – Cache data store for staging ECMWF ERA5 files. Defaults to `cache.DiskCacheStore`. If None, cache is turned off.
- **url** (`str`) – Override `cdsapi` url
- **key** (`str`) – Override `cdsapi` key

## Notes

ERA5 parameter list: <https://confluence.ecmwf.int/pages/viewpage.action?pageId=82870405#ERA5:datadocumentation-Parameterlistings>

All radiative quantities are accumulated. See <https://www.ecmwf.int/sites/default/files/elibrary/2015/18490-radiation-quantities-ecmwf-model-and-mars.pdf> for more information.

Local paths are loaded using `xarray.open_mfdataset()`. Pass `xr_kwargs` inputs to `open_metdataset()` to customize file loading.

## Examples

```
>>> from datetime import datetime
>>> from pycontrails.datalib.ecmwf import ERA5
>>> from pycontrails import GCPCacheStore
```

```
>>> # Store data files from CDS to local disk (default behavior)
>>> era5 = ERA5(
...     "2020-06-01 12:00:00",
...     variables=["air_temperature", "relative_humidity"],
...     pressure_levels=[350, 300]
... )
```

```
>>> # cache files to google cloud storage
>>> gcp_cache = GCPCacheStore(
```

(continues on next page)

(continued from previous page)

```

...     bucket="contrails-301217-unit-test",
...     cache_dir="ecmwf",
... )
>>> era5 = ERA5(
...     "2020-06-01 12:00:00",
...     variables=["air_temperature", "relative_humidity"],
...     pressure_levels=[350, 300],
...     cachestore=gcp_cache
... )

```

`__init__`(*time*, *variables*, *pressure\_levels=-1*, *paths=None*, *timestep\_freq=None*, *product\_type='reanalysis'*, *grid=None*, *cachestore=<object object>*, *url=None*, *key=None*)

## Methods

|                                                                                          |                                                                                |
|------------------------------------------------------------------------------------------|--------------------------------------------------------------------------------|
| <code>__init__</code> ( <i>time</i> , <i>variables</i> [, <i>pressure_levels</i> , ...]) |                                                                                |
| <code>cache_dataset</code> ( <i>dataset</i> )                                            | Cache data from data source.                                                   |
| <code>create_cachepath</code> ( <i>t</i> )                                               | Return cachepath to local ERA5 data file based on datetime.                    |
| <code>download</code> (** <i>xr_kwargs</i> )                                             | Confirm all data files are downloaded and available locally in the cachestore. |
| <code>download_dataset</code> ( <i>times</i> )                                           | Download data from data source for input times.                                |
| <code>is_datafile_cached</code> ( <i>t</i> , ** <i>xr_kwargs</i> )                       | Check datafile defined by datetime for variables and pressure levels in class. |
| <code>list_timesteps_cached</code> (** <i>xr_kwargs</i> )                                | Get a list of data files available locally in the cachestore.                  |
| <code>list_timesteps_not_cached</code> (** <i>xr_kwargs</i> )                            | Get a list of data files not available locally in the cachestore.              |
| <code>open_dataset</code> ( <i>disk_paths</i> , ** <i>xr_kwargs</i> )                    | Open multi-file dataset in xarray.                                             |
| <code>open_metdataset</code> ([ <i>dataset</i> , <i>xr_kwargs</i> ])                     | Open MetDataset from data source.                                              |
| <code>set_metadata</code> ( <i>ds</i> )                                                  | Set met source metadata on <i>ds.attrs</i> .                                   |

## Attributes

|                                  |                                                                                                       |
|----------------------------------|-------------------------------------------------------------------------------------------------------|
| <i>product_type</i>              | Product type, one of "reanalysis", "ensemble_mean", "ensemble_members", "ensemble_spread"             |
| <i>cds</i>                       | Handle to cdsapi.Client                                                                               |
| <i>url</i>                       | User provided cdsapi.Client url                                                                       |
| <i>key</i>                       | User provided cdsapi.Client url                                                                       |
| <i>dataset</i>                   | Select dataset for download based on pressure_levels.                                                 |
| <i>grid</i>                      | Lat / Lon grid spacing                                                                                |
| <i>hash</i>                      | Generate a unique hash for this datasource.                                                           |
| <i>is_single_level</i>           | Return True if the datasource is single level data.                                                   |
| <i>paths</i>                     | Path to local source files to load.                                                                   |
| <i>pressure_level_variables</i>  | ECMWF pressure level parameters.                                                                      |
| <i>pressure_levels</i>           | List of pressure levels.                                                                              |
| <i>single_level_variables</i>    | ECMWF surface level parameters.                                                                       |
| <i>supported_pressure_levels</i> | Get pressure levels available from ERA5 pressure level dataset.                                       |
| <i>supported_variables</i>       | Parameters available from data source.                                                                |
| <i>timesteps</i>                 | List of individual timesteps from data source derived from time Use parse_time() to handle TimeInput. |
| <i>variable_ecmwfs</i>           | Return a list of variable ecmwf_ids.                                                                  |
| <i>variable_shortnames</i>       | Return a list of variable short names.                                                                |
| <i>variable_standardnames</i>    | Return a list of variable standard names.                                                             |
| <i>variables</i>                 | Variables requested from data source Use parse_variables() to handle VariableInput.                   |
| <i>cachestore</i>                | Cache store for intermediates while processing data source If None, cache is turned off.              |

### cds

Handle to cdsapi.Client

### create\_cachepath(*t*)

Return cachepath to local ERA5 data file based on datetime.

This uniquely defines a cached data file ith class parameters.

#### Parameters

*t* (datetime | pd.Timestamp) – Datetime of datafile

#### Returns

*str* – Path to local ERA5 data file

### property dataset

Select dataset for download based on pressure\_levels.

One of “reanalysis-era5-pressure-levels” or “reanalysis-era5-single-levels”

#### Returns

*str* – ERA5 dataset name in CDS

### download\_dataset(*times*)

Download data from data source for input times.

**Parameters**

**times** (`list[datetime]`) – List of datetimes to download a store in cache

**property hash**

Generate a unique hash for this datasource.

**Returns**

`str` – Unique hash for met instance (sha1)

**key**

User provided `cdsapi.Client` url

**open\_metdataset** (`dataset=None, xr_kwargs=None, **kwargs`)

Open MetDataset from data source.

This method should download / load any required datafiles and returns a MetDataset of the multi-file dataset opened by xarray.

**Parameters**

- **dataset** (`xr.Dataset | None, optional`) – Input `xr.Dataset` loaded manually. The dataset must have the same format as the original data source API or files.
- **xr\_kwargs** (`dict[str, Any] | None, optional`) – Dictionary of keyword arguments passed into `xarray.open_mfdataset()` when opening files. Examples include “chunks”, “engine”, “parallel”, etc. Ignored if `dataset` is input.
- **\*\*kwargs** (`Any`) – Keyword arguments passed through directly into `MetDataset` constructor.

**Returns**

`MetDataset` – Meteorology dataset

**See also:**

`xarray.open_mfdataset()`

**property pressure\_level\_variables**

ECMWF pressure level parameters.

**Returns**

`list[MetVariable] | None` – List of `MetVariable` available in datasource

**product\_type**

Product type, one of “reanalysis”, “ensemble\_mean”, “ensemble\_members”, “ensemble\_spread”

**set\_metadata** (`ds`)

Set met source metadata on `ds.attrs`.

This is called within the `open_metdataset()` method to set metadata on the returned `MetDataset` instance.

**Parameters**

**ds** (`xr.Dataset | MetDataset`) – Dataset to set metadata on. Mutated in place.

**property single\_level\_variables**

ECMWF surface level parameters.

**Returns**

`list[MetVariable] | None` – List of `MetVariable` available in datasource



**property supported\_pressure\_levels**

Get pressure levels available from ERA5 pressure level dataset.

**Returns**

`list[int]` – List of integer pressure level values

**url**

User provided `cdsapi.Client` url

**pycontrails.datalib.ecmwf.era5\_model\_level**

Model-level ERA5 data access.

This module supports

- Retrieving model-level ERA5 data by submitting MARS requests through the Copernicus CDS.
- Processing retrieved GRIB files to produce netCDF files on target pressure levels.
- Local caching of processed netCDF files.
- Opening processed and cached files as a `pycontrails.MetDataset` object.

Consider using `pycontrails.datalib.ecmwf.ARCOERA5` to access model-level data from the nominal ERA5 reanalysis between 1959 and 2022. `pycontrails.datalib.ecmwf.ARCOERA5` accesses data through Google's [Analysis-Ready, Cloud Optimized ERA5 dataset](#) and has lower latency than this module, which retrieves data from the [Copernicus Climate Data Store](#). This module must be used to retrieve model-level data from ERA5 ensemble members or for more recent dates.

This module requires the following additional dependency:

- `metview` (binaries and python bindings)

**Classes**

|                                                      |                                                                            |
|------------------------------------------------------|----------------------------------------------------------------------------|
| <code>ERA5ModelLevel</code> (time, variables[, ...]) | Class to support model-level ERA5 data access, download, and organization. |
|------------------------------------------------------|----------------------------------------------------------------------------|

```
class pycontrails.datalib.ecmwf.era5_model_level.ERA5ModelLevel(time, variables,
                                                                pressure_levels=None,
                                                                timestep_freq=None,
                                                                product_type='reanalysis',
                                                                grid=None, levels=None,
                                                                ensemble_members=None,
                                                                cachestore=<object object>,
                                                                n_jobs=1, cache_grib=False,
                                                                url=None, key=None)
```

Bases: `ECMWFAPI`

Class to support model-level ERA5 data access, download, and organization.

The interface is similar to `pycontrails.datalib.ecmwf.ERA5`, which downloads pressure-level with much lower vertical resolution.

Requires account with [Copernicus Data Portal](#) and local credentials.

API credentials can be stored in a `~/cdsapirc` file or as `CDSAPI_URL` and `CDSAPI_KEY` environment variables.

```
export CDSAPI_URL=... export CDSAPI_KEY=...
```

Credentials can also be provided directly `url` and `key` keyword args.

See `cdsapi` documentation for more information.

### Parameters

- **time** (`datalib.TimeInput` | `None`) – The time range for data retrieval, either a single datetime or (start, end) datetime range. Input must be datetime-like or tuple of datetime-like (`datetime.datetime`, `pandas.Timestamp`, `numpy.datetime64`) specifying the (start, end) of the date range, inclusive. GRIB files will be downloaded from CDS in chunks no larger than 1 month for the nominal reanalysis and no larger than 1 day for ensemble members. This ensures that exactly one request is submitted per file on tape accessed. If `None`, paths must be defined and all time coordinates will be loaded from files.
- **variables** (`datalib.VariableInput`) – Variable name (i.e. “t”, “air\_temperature”, [“air\_temperature, specific\_humidity”])
- **pressure\_levels** (`datalib.PressureLevelInput`, *optional*) – Pressure levels for data, in hPa (mbar). To download surface-level parameters, use `pycontrails.datalib.ecmwf.ERA5`. Defaults to pressure levels that match model levels at a nominal surface pressure.
- **timestep\_freq** (`str`, *optional*) – Manually set the timestep interval within the bounds defined by `time`. Supports any string that can be passed to `pd.date_range(freq=...)`. By default, this is set to “1h” for reanalysis products and “3h” for ensemble products.
- **product\_type** (`str`, *optional*) – Product type, one of “reanalysis” and “ensemble\_members”. Unlike `pycontrails.datalib.ecmwf.ERA5`, this class does not support direct access to the ensemble mean and spread, which are not available on model levels.
- **grid** (`float`, *optional*) – Specify latitude/longitude grid spacing in data. By default, this is set to 0.25 for reanalysis products and 0.5 for ensemble products.
- **levels** (`list[int]`, *optional*) – Specify ECMWF model levels to include in MARS requests. By default, this is set to include all model levels.
- **ensemble\_members** (`list[int]`, *optional*) – Specify ensemble members to include. Valid only when the product type is “ensemble\_members”. By default, includes every available ensemble member.
- **cachestore** (`cache.CacheStore` | `None`, *optional*) – Cache data store for staging processed netCDF files. Defaults to `pycontrails.core.cache.DiskCacheStore`. If `None`, cache is turned off.
- **cache\_grib** (`bool`, *optional*) – If `True`, cache downloaded GRIB files rather than storing them in a temporary file. By default, `False`.
- **url** (`str`) – Override `cdsapi` url
- **key** (`str`) – Override `cdsapi` key

### `create_cachepath(t)`

Return cachepath to local ERA5 data file based on datetime.

This uniquely defines a cached data file with class parameters.

#### Parameters

`t` (`datetime` | `pd.Timestamp`) – Datetime of datafile

#### Returns

`str` – Path to local ERA5 data file

**property dataset**

Select dataset for downloading model-level data.

Always returns “reanalysis-era5-complete”.

**Returns**

`str` – Model-level ERA5 dataset name in CDS

**download\_dataset**(*times*)

Download data from data source for input times.

**Parameters**

**times** (`list[datetime]`) – List of datetimes to download a store in cache

**grid**

Lat / Lon grid spacing

**mars\_request**(*times*)

Generate MARS request for specific list of times.

**Parameters**

**times** (`list[datetime]`) – Times included in MARS request.

**Returns**

`dict[str, str]` – MARS request for submission to Copernicus CDS.

**open\_metdataset**(*dataset=None, xr\_kwargs=None, \*\*kwargs*)

Open MetDataset from data source.

This method should download / load any required datafiles and returns a MetDataset of the multi-file dataset opened by xarray.

**Parameters**

- **dataset** (`xr.Dataset` | `None`, *optional*) – Input `xr.Dataset` loaded manually. The dataset must have the same format as the original data source API or files.
- **xr\_kwargs** (`dict[str, Any]` | `None`, *optional*) – Dictionary of keyword arguments passed into `xarray.open_mfdataset()` when opening files. Examples include “chunks”, “engine”, “parallel”, etc. Ignored if dataset is input.
- **\*\*kwargs** (`Any`) – Keyword arguments passed through directly into `MetDataset` constructor.

**Returns**

`MetDataset` – Meteorology dataset

**See also:**

`xarray.open_mfdataset()`

**paths**

Path to local source files to load. Set to the paths of files cached in `cachestore` if no paths input is provided on init.

**property pressure\_level\_variables**

ECMWF pressure level parameters available on model levels.

**Returns**

`list[MetVariable]` – List of `MetVariable` available in datasource

**pressure\_levels**

List of pressure levels. Set to [-1] for data without level coordinate. Use `parse_pressure_levels()` to handle `PressureLevelInput`.

**set\_metadata(ds)**

Set met source metadata on `ds.attrs`.

This is called within the `open_metdataset()` method to set metadata on the returned `MetDataset` instance.

**Parameters**

`ds` (`xr.Dataset` | `MetDataset`) – Dataset to set metadata on. Mutated in place.

**property single\_level\_variables**

ECMWF single-level parameters available on model levels.

**Returns**

`list[MetVariable]` – Always returns an empty list. To access single-level variables, used `pycontrails.datalib.ecmwf.ERA5`.

**timesteps**

List of individual timesteps from data source derived from `time` Use `parse_time()` to handle `TimeInput`.

**variables**

Variables requested from data source Use `parse_variables()` to handle `VariableInput`.

**pycontrails.datalib.ecmwf.HRES**

```
class pycontrails.datalib.ecmwf.HRES(time, variables, pressure_levels=-1, paths=None, cachepath=None,
                                     grid=0.25, stream='oper', field_type='fc', forecast_time=None,
                                     cachestore=<object object>, url=None, key=None, email=None)
```

Bases: `ECMWFAPI`

Class to support HRES data access, download, and organization.

Requires account with ECMWF and API key.

API credentials set in local `~/.ecmwfapirc` file:

```
{
  "url": "https://api.ecmwf.int/v1",
  "email": "<email>",
  "key": "<key>"
}
```

Credentials can also be provided directly `url` `key`, and `email` keyword args.

See [ecmwf-api-client](#) documentation for more information.

**Parameters**

- **time** (`datalib.TimeInput` | `None`) – The time range for data retrieval, either a single datetime or (start, end) datetime range. Input must be a datetime-like or tuple of datetime-like (datetime, `pandas.Timestamp`, `numpy.datetime64`) specifying the (start, end) of the date range, inclusive. If `forecast_time` is unspecified, the forecast time will be assumed to be the nearest synoptic hour: 00, 06, 12, 18. All subsequent times will be downloaded for relative to `forecast_time`. If `None`, `paths` must be defined and all time coordinates will be loaded from files.

- **variables** (`datalib.VariableInput`) – Variable name (i.e. “air\_temperature”, [“air\_temperature, relative\_humidity”]) See [pressure\\_level\\_variables](#) for the list of available variables.
- **pressure\_levels** (`datalib.PressureLevelInput`, *optional*) – Pressure levels for data, in hPa (mbar) Set to -1 for to download surface level parameters. Defaults to -1.
- **paths** (`str` | `list[str]` | `pathlib.Path` | `list[pathlib.Path]` | `None`, *optional*) – Path to CDS NetCDF files to load manually. Can include glob patterns to load specific files. Defaults to `None`, which looks for files in the `cachestore` or CDS.
- **grid** (`float`, *optional*) – Specify latitude/longitude grid spacing in data. Defaults to 0.25.
- **stream** (`str`, *optional*) – “oper” = atmospheric model/HRES, “enfo” = ensemble forecast. Defaults to “oper” (HRES),
- **field\_type** (`str`, *optional*) – Field type can be e.g. forecast (fc), perturbed forecast (pf), control forecast (cf), analysis (an). Defaults to “fc”.
- **forecast\_time** (`DatetimeLike`, *optional*) – Specify forecast run by runtime. Defaults to `None`.
- **cachestore** (`cache.CacheStore` | `None`, *optional*) – Cache data store for staging data files. Defaults to `cache.DiskCacheStore`. If `None`, cache is turned off.
- **url** (`str`) – Override `ecmwf-api-client` url
- **key** (`str`) – Override `ecmwf-api-client` key
- **email** (`str`) – Override `ecmwf-api-client` email

## Notes

### MARS key word definitions

- **class**: in most cases this will be operational data, or “od”
- **stream**: “enfo” = ensemble forecast, “oper” = atmospheric model/HRES
- **expver**: experimental version, production data is 1 or 2
- **date**: there are numerous acceptable date formats
- **time**: forecast base time, always in synoptic time (0,6,12,18 UTC)
- **type**: forecast (oper), perturbed or control forecast (enfo only), or analysis
- **levtype**: options include surface, pressure levels, or model levels
- **levelist**: list of levels in format specified by **levtype** [levelist](#)
- **param**: list of variables in catalog number, long name or short name
- **step**: hourly time steps from base forecast time
- **number**: for ensemble forecasts, ensemble numbers
- **format**: specify netcdf instead of default grib, DEPRECATED [format](#)
- **grid**: specify model return grid spacing

Local paths are loaded using `xarray.open_mfdataset()`. Pass `xr_kwargs` inputs to `open_metdataset()` to customize file loading.

## Examples

```
>>> from datetime import datetime
>>> from pycontrails import GPCCacheStore
>>> from pycontrails.datalib.ecmwf import HRES
```

```
>>> # Store data files to local disk (default behavior)
>>> times = (datetime(2021, 5, 1, 2), datetime(2021, 5, 1, 3))
>>> hres = HRES(times, variables="air_temperature", pressure_levels=[300, 250])
```

```
>>> # Cache files to google cloud storage
>>> gcp_cache = GPCCacheStore(
...     bucket="contrails-301217-unit-test",
...     cache_dir="ecmwf",
... )
>>> hres = HRES(
...     times,
...     variables="air_temperature",
...     pressure_levels=[300, 250],
...     cachestore=gcp_cache
... )
```

`__init__` (*time, variables, pressure\_levels=-1, paths=None, cachepath=None, grid=0.25, stream='oper', field\_type='fc', forecast\_time=None, cachestore=<object object>, url=None, key=None, email=None*)

## Methods

|                                                                |                                                                                |
|----------------------------------------------------------------|--------------------------------------------------------------------------------|
| <code>__init__(time, variables[, pressure_levels, ...])</code> |                                                                                |
| <code>cache_dataset(dataset)</code>                            | Cache data from data source.                                                   |
| <code>create_cachepath(t)</code>                               | Return cachepath to local data file based on datetime.                         |
| <code>create_synoptic_time_ranges(timesteps)</code>            | Create synoptic time bounds encompassing date range.                           |
| <code>download(**xr_kwargs)</code>                             | Confirm all data files are downloaded and available locally in the cachestore. |
| <code>download_dataset(times)</code>                           | Download data from data source for input times.                                |
| <code>generate_mars_request([forecast_time, ...])</code>       | Generate MARS request in MARS request syntax.                                  |
| <code>is_datafile_cached(t, **xr_kwargs)</code>                | Check datafile defined by datetime for variables and pressure levels in class. |
| <code>list_from_mars()</code>                                  | List metadata on query from MARS.                                              |
| <code>list_timesteps_cached(**xr_kwargs)</code>                | Get a list of data files available locally in the cachestore.                  |
| <code>list_timesteps_not_cached(**xr_kwargs)</code>            | Get a list of data files not available locally in the cachestore.              |
| <code>open_dataset(disk_paths, **xr_kwargs)</code>             | Open multi-file dataset in xarray.                                             |
| <code>open_metdataset([dataset, xr_kwargs])</code>             | Open MetDataset from data source.                                              |
| <code>set_metadata(ds)</code>                                  | Set met source metadata on ds.attrs.                                           |

## Attributes

|                                  |                                                                                                                             |
|----------------------------------|-----------------------------------------------------------------------------------------------------------------------------|
| <i>server</i>                    | Handle to ECMWFService client                                                                                               |
| <i>stream</i>                    | stream type, "oper" = atmospheric model/HRES, "enfo" = ensemble forecast.                                                   |
| <i>field_type</i>                | Field type, forecast ("fc"), perturbed forecast ("pf"), control forecast ("cf"), analysis ("an").                           |
| <i>forecast_time</i>             | Forecast run time, either specified or assigned by the closest previous forecast run                                        |
| <i>url</i>                       |                                                                                                                             |
| <i>key</i>                       |                                                                                                                             |
| <i>email</i>                     |                                                                                                                             |
| <i>grid</i>                      | Lat / Lon grid spacing                                                                                                      |
| <i>hash</i>                      | Generate a unique hash for this datasource.                                                                                 |
| <i>is_single_level</i>           | Return True if the datasource is single level data.                                                                         |
| <i>paths</i>                     | Path to local source files to load.                                                                                         |
| <i>pressure_level_variables</i>  | ECMWF pressure level parameters.                                                                                            |
| <i>pressure_levels</i>           | List of pressure levels.                                                                                                    |
| <i>single_level_variables</i>    | ECMWF surface level parameters.                                                                                             |
| <i>step_offset</i>               | Difference between <i>forecast_time</i> and first timestep.                                                                 |
| <i>steps</i>                     | Forecast steps from <i>forecast_time</i> corresponding within input time.                                                   |
| <i>supported_pressure_levels</i> | Get pressure levels available from MARS.                                                                                    |
| <i>supported_variables</i>       | Parameters available from data source.                                                                                      |
| <i>timesteps</i>                 | List of individual timesteps from data source derived from <i>time</i> Use <i>parse_time()</i> to handle <i>TimeInput</i> . |
| <i>variable_ecmwfids</i>         | Return a list of variable <i>ecmwf_ids</i> .                                                                                |
| <i>variable_shortnames</i>       | Return a list of variable short names.                                                                                      |
| <i>variable_standardnames</i>    | Return a list of variable standard names.                                                                                   |
| <i>variables</i>                 | Variables requested from data source Use <i>parse_variables()</i> to handle <i>VariableInput</i> .                          |
| <i>cachestore</i>                | Cache store for intermediates while processing data source If None, cache is turned off.                                    |

### **create\_cachepath(*t*)**

Return cachepath to local data file based on datetime.

#### **Parameters**

*t* (datetime) – Datetime of datafile

#### **Returns**

*str* – Path to cached data file

### **classmethod create\_synoptic\_time\_ranges(*timesteps*)**

Create synoptic time bounds encompassing date range.

Extracts time bounds for synoptic time range ([00:00, 11:59], [12:00, 23:59]) for a list of input timesteps.

#### **Parameters**

**timesteps** (`list[pd.Timestamp]`) – List of timesteps formatted as `pd.Timestamps`. Often this is the output from `pd.date_range()`

**Returns**

`list[tuple[pd.Timestamp, pd.Timestamp]]` – List of tuple time bounds that can be used as inputs to `HRES(time=...)`

**download\_dataset** (*times*)

Download data from data source for input times.

**Parameters**

**times** (`list[:class:`datetime`]`) – List of datetimes to download and store in cache datastore

**email**

**field\_type**

Field type, forecast (“fc”), perturbed forecast (“pf”), control forecast (“cf”), analysis (“an”).

**forecast\_time**

Forecast run time, either specified or assigned by the closest previous forecast run

**generate\_mars\_request** (*forecast\_time=None, steps=None, request\_type='retrieve', request\_format='mars'*)

Generate MARS request in MARS request syntax.

**Parameters**

- **forecast\_time** (`datetime, optional`) – Base datetime for the forecast. Defaults to `forecast_time`.
- **steps** (`list[int], optional`) – list of steps. Defaults to `steps`.
- **request\_type** (`str, optional`) – “retrieve” for download request or “list” for metadata request. Defaults to “retrieve”.
- **request\_format** (`str, optional`) – “mars” for MARS string format, or “dict” for dict version. Defaults to “mars”.

**Returns**

`str | dict[str, Any]` – Returns MARS query string if `request_format` is “mars”. Returns dict query if `request_format` is “dict”

**Notes**

Brief overview of [MARS request syntax](#)

**property hash**

Generate a unique hash for this datasource.

**Returns**

`str` – Unique hash for met instance (sha1)

**key**

**list\_from\_mars**()

List metadata on query from MARS.

**Returns**

`str` – Metadata for MARS request. Note this is queued the same as data requests.



**open\_metdataset**(*dataset=None, xr\_kwargs=None, \*\*kwargs*)

Open MetDataset from data source.

This method should download / load any required datafiles and returns a MetDataset of the multi-file dataset opened by xarray.

#### Parameters

- **dataset** (`xr.Dataset` | `None`, *optional*) – Input `xr.Dataset` loaded manually. The dataset must have the same format as the original data source API or files.
- **xr\_kwargs** (`dict[str, Any]` | `None`, *optional*) – Dictionary of keyword arguments passed into `xarray.open_mfdataset()` when opening files. Examples include “chunks”, “engine”, “parallel”, etc. Ignored if dataset is input.
- **\*\*kwargs** (`Any`) – Keyword arguments passed through directly into `MetDataset` constructor.

#### Returns

`MetDataset` – Meteorology dataset

#### See also:

`xarray.open_mfdataset()`

**property pressure\_level\_variables**

ECMWF pressure level parameters.

#### Returns

`list[MetVariable]` | `None` – List of `MetVariable` available in datasource

**server**

Handle to ECMWFService client

**set\_metadata**(*ds*)

Set met source metadata on `ds.attrs`.

This is called within the `open_metdataset()` method to set metadata on the returned `MetDataset` instance.

#### Parameters

**ds** (`xr.Dataset` | `MetDataset`) – Dataset to set metadata on. Mutated in place.

**property single\_level\_variables**

ECMWF surface level parameters.

#### Returns

`list[MetVariable]` | `None` – List of `MetVariable` available in datasource

**property step\_offset**

Difference between `forecast_time` and first timestep.

#### Returns

`int` – Number of steps to offset in order to retrieve data starting from input time. Returns 0 if `timesteps` is empty when loading from paths.

**property steps**

Forecast steps from `forecast_time` corresponding within input `time`.

#### Returns

`list[int]` – List of forecast steps relative to `forecast_time`

**stream**

stream type, “oper” = atmospheric model/HRES, “enfo” = ensemble forecast.

**property supported\_pressure\_levels**

Get pressure levels available from MARS.

**Returns**

list[int] – List of integer pressure level values

**url**

**pycontrails.datalib.ecmwf.hres\_model\_level**

Model-level HRES data access from the ECMWF operational archive.

This module supports

- Retrieving model-level HRES data by submitting MARS requests through the ECMWF API.
- Processing retrieved GRIB files to produce netCDF files on target pressure levels.
- Local caching of processed netCDF files.
- Opening processed and cached files as a *pycontrails.MetDataset* object.

This module requires the following additional dependency:

- [metview](#) (binaries and python bindings)

**Classes**

|                                                |                                                                            |
|------------------------------------------------|----------------------------------------------------------------------------|
| <i>HRESModelLevel</i> (time, variables[, ...]) | Class to support model-level HRES data access, download, and organization. |
|------------------------------------------------|----------------------------------------------------------------------------|

```
class pycontrails.datalib.ecmwf.hres_model_level.HRESModelLevel(time, variables,
                                                                pressure_levels=None,
                                                                timestep_freq=None, grid=None,
                                                                forecast_time=None,
                                                                levels=None,
                                                                ensemble_members=None,
                                                                cachestore=<object object>,
                                                                cache_grib=False, url=None,
                                                                key=None, email=None)
```

Bases: ECMWFAPI

Class to support model-level HRES data access, download, and organization.

The interface is similar to *pycontrails.datalib.ecmwf.HRES*, which downloads pressure-level data with much lower vertical resolution and single-level data. Note, however, that only a subset of the pressure-level data available through the operational archive is available as model-level data. As a consequence, this interface only supports access to nominal HRES forecasts (corresponding to `stream = "oper"` and `field_type = "fc"` in *pycontrails.datalib.ecmwf.HRES*) initialized at 00z and 12z.

Requires account with ECMWF and API key.

API credentials can be set in local `~/.ecmwfapirc` file:

```
{
  "url": "https://api.ecmwf.int/v1",
  "email": "<email>",
  "key": "<key>"
}
```

Credentials can also be provided directly in `url`, `key`, and `email` keyword args.

See `ecmwf-api-client` documentation for more information.

### Parameters

- **time** (`datalib.TimeInput`) – The time range for data retrieval, either a single datetime or (start, end) datetime range. Input must be datetime-like or tuple of datetime-like (`datetime.datetime`, `pandas.Timestamp`, `numpy.datetime64`) specifying the (start, end) of the date range, inclusive. All times will be downloaded in a single GRIB file, which ensures that exactly one request is submitted per file on tape accessed. If `forecast_time` is unspecified, the forecast time will be assumed to be the nearest synoptic hour available in the operational archive (00 or 12). All subsequent times will be downloaded for relative to `forecast_time`.
- **variables** (`datalib.VariableInput`) – Variable name (i.e. “t”, “air\_temperature”, [“air\_temperature, specific\_humidity”])
- **pressure\_levels** (`datalib.PressureLevelInput`, *optional*) – Pressure levels for data, in hPa (mbar). To download surface-level parameters, use `pycontrails.datalib.ecmwf.HRES`. Defaults to pressure levels that match model levels at a nominal surface pressure.
- **timestep\_freq** (`str`, *optional*) – Manually set the timestep interval within the bounds defined by `time`. Supports any string that can be passed to `pandas.date_range(freq=...)`. By default, this is set to the highest frequency that can supported the requested time range (“1h” out to 96 hours, “3h” out to 144 hours, and “6h” out to 240 hours)
- **grid** (`float`, *optional*) – Specify latitude/longitude grid spacing in data. By default, this is set to 0.1.
- **forecast\_time** (`DatetimeLike`, *optional*) – Specify forecast by initialization time. By default, set to the most recent forecast that includes the requested time range.
- **levels** (`list[int]`, *optional*) – Specify ECMWF model levels to include in MARS requests. By default, this is set to include all model levels.
- **cachestore** (`CacheStore | None`, *optional*) – Cache data store for staging processed netCDF files. Defaults to `pycontrails.core.cache.DiskCacheStore`. If `None`, cache is turned off.
- **cache\_grib** (`bool`, *optional*) – If `True`, cache downloaded GRIB files rather than storing them in a temporary file. By default, `False`.
- **url** (`str`) – Override `ecmwf-api-client` url
- **key** (`str`) – Override `ecmwf-api-client` key
- **email** (`str`) – Override `ecmwf-api-client` email

### `create_cachepath(t)`

Return cachepath to local HRES data file based on datetime.

This uniquely defines a cached data file with class parameters.

#### Parameters

`t` (`datetime | pd.Timestamp`) – Datetime of datafile

**Returns**

`str` – Path to local HRES data file

**download\_dataset**(*times*)

Download data from data source for input times.

**Parameters**

**times** (`list[datetime]`) – List of datetimes to download a store in cache

**get\_forecast\_steps**(*times*)

Convert list of times to list of forecast steps.

**Parameters**

**times** (`list[datetime]`) – Times to convert to forecast steps

**Returns**

`list[int]` – Forecast step at each time

**grid**

Lat / Lon grid spacing

**mars\_request**(*times*)

Generate MARS request for specific list of times.

**Parameters**

**times** (`list[datetime]`) – Times included in MARS request.

**Returns**

`str` – MARS request for submission to ECMWF API.

**open\_metdataset**(*dataset=None, xr\_kwargs=None, \*\*kwargs*)

Open MetDataset from data source.

This method should download / load any required datafiles and returns a MetDataset of the multi-file dataset opened by xarray.

**Parameters**

- **dataset** (`xr.Dataset` | `None`, *optional*) – Input `xr.Dataset` loaded manually. The dataset must have the same format as the original data source API or files.
- **xr\_kwargs** (`dict[str, Any]` | `None`, *optional*) – Dictionary of keyword arguments passed into `xarray.open_mfdataset()` when opening files. Examples include “chunks”, “engine”, “parallel”, etc. Ignored if dataset is input.
- **\*\*kwargs** (`Any`) – Keyword arguments passed through directly into `MetDataset` constructor.

**Returns**

`MetDataset` – Meteorology dataset

**See also:**

`xarray.open_mfdataset()`

**paths**

Path to local source files to load. Set to the paths of files cached in cachestore if no paths input is provided on init.

**property pressure\_level\_variables**

ECMWF pressure level parameters available on model levels.

**Returns**

`list[MetVariable]` – List of MetVariable available in datasource

**pressure\_levels**

List of pressure levels. Set to [-1] for data without level coordinate. Use `parse_pressure_levels()` to handle `PressureLevelInput`.

**set\_metadata(ds)**

Set met source metadata on `ds.attrs`.

This is called within the `open_metdataset()` method to set metadata on the returned `MetDataset` instance.

**Parameters**

`ds (xr.Dataset | MetDataset)` – Dataset to set metadata on. Mutated in place.

**property single\_level\_variables**

ECMWF single-level parameters available on model levels.

**Returns**

`list[MetVariable]` – Always returns an empty list. To access single-level variables, use `pycontrails.datalib.ecmwf.HRES`.

**property step\_offset**

Difference between `forecast_time` and first timestep.

**Returns**

`int` – Number of steps to offset in order to retrieve data starting from input time.

**property steps**

Forecast steps from `forecast_time` corresponding within input time.

**Returns**

`list[int]` – List of forecast steps relative to `forecast_time`

**timesteps**

List of individual timesteps from data source derived from `time` Use `parse_time()` to handle `TimeInput`.

**variables**

Variables requested from data source Use `parse_variables()` to handle `VariableInput`.

**pycontrails.datalib.ecmwf.hres.get\_forecast\_filename**

`pycontrails.datalib.ecmwf.hres.get_forecast_filename(forecast_time, timestep, cc='A1', S=None, E='1')`

Create forecast filename from ECMWF dissemination products.

See [ECMWF Dissemination](#) for more information:

The following dissemination filename convention is used for the transmission of ECMWF dissemination products:

`ccSMMDDHHIIImmddhhiie` where:

`cc` is Dissemination stream name

`S` is dissemination data stream indicator

`MMDDHHII` is month, day, hour and minute on which the products are based

(continues on next page)

(continued from previous page)

mmddhhii is month, day, hour and minute on which the products are valid at  
 ddhhii is set to "\_\_\_\_\_" for Seasonal Forecasting System products  
 ii is set to 01 for high resolution forecast time step zero, type=fc, step=0  
 E is the Experiment Version Number' (as EXPVER in MARS, normally 1)

**Parameters**

- **forecast\_time** (datetime) – Forecast time to stage
- **timestep** (datetime) – Time within forecast
- **cc** (str, optional) – Dissemination stream name. Defaults to "A1"
- **S** (str, optional) – Dissemination data stream indicator. If None, S is set to "S" for 6 or 18 hour forecast and "D" for 0 or 12 hour forecast.
- **E** (str, optional) – Experiment Version Number. Defaults to "1"

**Returns**

str – Filename to forecast file

**Raises**

**ValueError** – If forecast\_time is not on a synoptic hour (00, 06, 12, 18) If timestep is before forecast\_time

**pycontrails.datalib.ecmwf.model\_levels**

Utilities for working with ECMWF model-level data.

This module requires the following additional dependency:

- lxml

**Functions**

|                                                               |                                                                                      |
|---------------------------------------------------------------|--------------------------------------------------------------------------------------|
| <code>pressure_levels_at_model_levels(alt_ft_min, ...)</code> | Return the pressure levels at each model level assuming a constant surface pressure. |
|---------------------------------------------------------------|--------------------------------------------------------------------------------------|

`pycontrails.datalib.ecmwf.model_levels.pressure_levels_at_model_levels(alt_ft_min, alt_ft_max)`

Return the pressure levels at each model level assuming a constant surface pressure.

The pressure levels are rounded to the nearest hPa.

**Parameters**

- **alt\_ft\_min** (float) – Minimum altitude, [ft].
- **alt\_ft\_max** (float) – Maximum altitude, [ft].

**Returns**

list[int] – List of pressure levels, [hPa].

**pycontrails.datalib.ecmwf.IFS**

```
class pycontrails.datalib.ecmwf.IFS(time, variables, pressure_levels=-1, paths=None, grid=None,
                                  forecast_path=None, forecast_date=None)
```

Bases: *MetDataSource*

ECMWF Integrated Forecasting System (IFS) data source.

**Warning:** This data source is not fully implemented.

**Parameters**

- **time** (*datalib.TimeInput* | *None*) – The time range for data retrieval, either a single datetime or (start, end) datetime range. Input must be a single datetime-like or tuple of datetime-like (*datetime*, *pandas.Timestamp*, *numpy.datetime64*) specifying the (start, end) of the date range, inclusive. If *None*, all time coordinates will be loaded.
- **variables** (*datalib.VariableInput*) – Variable name (i.e. “air\_temperature”, [“air\_temperature, relative\_humidity”]) See *pressure\_level\_variables* for the list of available variables.
- **pressure\_levels** (*datalib.PressureLevelInput*, *optional*) – Pressure level bounds for data (min, max), in hPa (mbar) Set to -1 for to download surface level parameters. Defaults to -1.
- **paths** (*str* | *list[str]* | *pathlib.Path* | *list[pathlib.Path]* | *None*, *optional*) – UNSUPPORTED FOR IFS
- **forecast\_path** (*str* | *pathlib.Path* | *None*, *optional*) – Path to local forecast files. Defaults to *None*
- **forecast\_date** (*DatetimeLike*, *optional*) – Forecast date to load specific netcdf files. Defaults to *None*

**Notes**

This takes an average pressure of the model level to create pressure level dimensions.

```
__init__(time, variables, pressure_levels=-1, paths=None, grid=None, forecast_path=None,
          forecast_date=None)
```

## Methods

|                                                                |                                                                                |
|----------------------------------------------------------------|--------------------------------------------------------------------------------|
| <code>__init__(time, variables[, pressure_levels, ...])</code> |                                                                                |
| <code>cache_dataset(dataset)</code>                            | Cache data from data source.                                                   |
| <code>create_cachepath(t)</code>                               | Return cachepath to local data file based on datetime.                         |
| <code>download(**xr_kwargs)</code>                             | Confirm all data files are downloaded and available locally in the cachestore. |
| <code>download_dataset(times)</code>                           | Download data from data source for input times.                                |
| <code>is_datafile_cached(t, **xr_kwargs)</code>                | Check datafile defined by datetime for variables and pressure levels in class. |
| <code>list_timesteps_cached(**xr_kwargs)</code>                | Get a list of data files available locally in the cachestore.                  |
| <code>list_timesteps_not_cached(**xr_kwargs)</code>            | Get a list of data files not available locally in the cachestore.              |
| <code>open_dataset(disk_paths, **xr_kwargs)</code>             | Open multi-file dataset in xarray.                                             |
| <code>open_metdataset([dataset, xr_kwargs])</code>             | Open MetDataset from data source.                                              |
| <code>set_metadata(ds)</code>                                  | Set met source metadata on <code>ds.attrs</code> .                             |

## Attributes

|                                        |                                                                                                                                               |
|----------------------------------------|-----------------------------------------------------------------------------------------------------------------------------------------------|
| <code>forecast_date</code>             | Forecast datetime of IFS forecast                                                                                                             |
| <code>forecast_path</code>             | Root path of IFS data                                                                                                                         |
| <code>grid</code>                      | Lat / Lon grid spacing                                                                                                                        |
| <code>hash</code>                      | Generate a unique hash for this datasource.                                                                                                   |
| <code>is_single_level</code>           | Return True if the datasource is single level data.                                                                                           |
| <code>paths</code>                     | Path to local source files to load.                                                                                                           |
| <code>pressure_level_variables</code>  | Parameters available from data source.                                                                                                        |
| <code>pressure_levels</code>           | List of pressure levels.                                                                                                                      |
| <code>single_level_variables</code>    | Parameters available from data source.                                                                                                        |
| <code>supported_pressure_levels</code> | IFS does not provide constant pressure levels and instead uses model levels.                                                                  |
| <code>supported_variables</code>       | IFS parameters available.                                                                                                                     |
| <code>timesteps</code>                 | List of individual timesteps from data source derived from <code>time</code> Use <code>parse_time()</code> to handle <code>TimeInput</code> . |
| <code>variable_shortnames</code>       | Return a list of variable short names.                                                                                                        |
| <code>variable_standardnames</code>    | Return a list of variable standard names.                                                                                                     |
| <code>variables</code>                 | Variables requested from data source Use <code>parse_variables()</code> to handle <code>VariableInput</code> .                                |
| <code>cachestore</code>                | Cache store for intermediates while processing data source If None, cache is turned off.                                                      |

### `cache_dataset(dataset)`

Cache data from data source.

#### Parameters

**dataset** (`xarray.Dataset`) – Dataset loaded from remote API or local files. The dataset must have the same format as the original data source API or files.



**create\_cachepath(*t*)**

Return cachepath to local data file based on datetime.

**Parameters**

**t** (datetime) – Datetime of datafile

**Returns**

*str* – Path to cached data file

**download\_dataset(*times*)**

Download data from data source for input times.

**Parameters**

**times** (list[datetime]) – List of datetimes to download a store in cache

**forecast\_date**

Forecast datetime of IFS forecast

**forecast\_path**

Root path of IFS data

**open\_metdataset(*dataset=None, xr\_kwargs=None, \*\*kwargs*)**

Open MetDataset from data source.

This method should download / load any required datafiles and returns a MetDataset of the multi-file dataset opened by xarray.

**Parameters**

- **dataset** (xr.Dataset | None, *optional*) – Input xr.Dataset loaded manually. The dataset must have the same format as the original data source API or files.
- **xr\_kwargs** (dict[str, Any] | None, *optional*) – Dictionary of keyword arguments passed into `xarray.open_mfdataset()` when opening files. Examples include “chunks”, “engine”, “parallel”, etc. Ignored if dataset is input.
- **\*\*kwargs** (Any) – Keyword arguments passed through directly into MetDataset constructor.

**Returns**

*MetDataset* – Meteorology dataset

**See also:**

`xarray.open_mfdataset()`

**set\_metadata(*ds*)**

Set met source metadata on `ds.attrs`.

This is called within the `open_metdataset()` method to set metadata on the returned MetDataset instance.

**Parameters**

**ds** (xr.Dataset | MetDataset) – Dataset to set metadata on. Mutated in place.

**property supported\_pressure\_levels**

IFS does not provide constant pressure levels and instead uses model levels.

**Returns**

list[int]

**property supported\_variables**

IFS parameters available.

**Returns**

list[MetVariable] | None – List of MetVariable available in datasource

**pycontrails.datalib.ecmwf.variables**

ECMWF Parameter Support.

**Sourced from the ECMWF Parameter DB:**<https://apps.ecmwf.int/codes/grib/param-db>**11.2.2 GFS**

|                                                               |                           |
|---------------------------------------------------------------|---------------------------|
| <code>datalib.gfs.GFSForecast</code> (time, variables[, ...]) | GFS Forecast data access. |
| <code>datalib.gfs.variables</code>                            | GFS Parameter Support.    |

**pycontrails.datalib.gfs.GFSForecast**

```
class pycontrails.datalib.gfs.GFSForecast(time, variables, pressure_levels=-1, paths=None, grid=0.25,
                                         forecast_time=None, cachestore=<object object>,
                                         show_progress=False)
```

Bases: *MetDataSource*

GFS Forecast data access.

**Parameters**

- **time** (*datalib.TimeInput*) – The time range for data retrieval, either a single datetime or (start, end) datetime range. Input must be a single datetime-like or tuple of datetime-like (datetime, *pandas.Timestamp*, *numpy.datetime64*) specifying the (start, end) of the date range, inclusive. All times will be downloaded for a single forecast model run nearest to the start time (see *forecast\_time*) If None, paths must be defined and all time coordinates will be loaded from files.
- **variables** (*datalib.VariableInput*) – Variable name (i.e. “temperature”, [“temperature, relative\_humidity”]) See *pressure\_level\_variables* for the list of available variables.
- **pressure\_levels** (*datalib.PressureLevelInput*, *optional*) – Pressure levels for data, in hPa (mbar) Set to [-1] for to download surface level parameters. Defaults to [-1].
- **paths** (str | list[str] | *pathlib.Path* | list[*pathlib.Path*] | None, *optional*) – Path to files to load manually. Can include glob patterns to load specific files. Defaults to None, which looks for files in the *cachestore* or GFS AWS bucket.
- **grid** (float, *optional*) – Specify latitude/longitude grid spacing in data. Defaults to 0.25.
- **forecast\_time** (*DatetimeLike*, *optional*) – Specify forecast run by runtime. If None (default), the forecast time is set to the 6 hour floor of the first timestep.
- **cachestore** (cache.CacheStore | None, *optional*) – Cache data store for staging data files. Defaults to cache.DiskCacheStore. If None, cachestore is turned off.
- **show\_progress** (bool, *optional*) – Show progress when downloading files from GFS AWS Bucket. Defaults to False

## Examples

```
>>> from datetime import datetime
>>> from pycontrails.datalib.gfs import GFSForecast
```

```
>>> # Store data files to local disk (default behavior)
>>> times = ("2022-03-22 00:00:00", "2022-03-22 03:00:00")
>>> gfs = GFSForecast(times, variables="air_temperature", pressure_levels=[300,
↳250])
>>> gfs
GFSForecast
  Timesteps: ['2022-03-22 00', '2022-03-22 01', '2022-03-22 02', '2022-03-22 03']
  Variables: ['t']
  Pressure levels: [250, 300]
  Grid: 0.25
  Forecast time: 2022-03-22 00:00:00
```

```
>>> gfs = GFSForecast(times, variables="air_temperature", pressure_levels=[300,
↳250], grid=0.5)
>>> gfs
GFSForecast
  Timesteps: ['2022-03-22 00', '2022-03-22 03']
  Variables: ['t']
  Pressure levels: [250, 300]
  Grid: 0.5
  Forecast time: 2022-03-22 00:00:00
```

## Notes

- [NOAA GFS](#)
- [Documentation](#)
- [Parameter sets](#)
- [GFS Documentation](#)

`__init__` (*time, variables, pressure\_levels=-1, paths=None, grid=0.25, forecast\_time=None, cachestore=<object object>, show\_progress=False*)

## Methods

|                                                                |                                                                                        |
|----------------------------------------------------------------|----------------------------------------------------------------------------------------|
| <code>__init__(time, variables[, pressure_levels, ...])</code> |                                                                                        |
| <code>cache_dataset(dataset)</code>                            | Cache data from data source.                                                           |
| <code>create_cachepath(t)</code>                               | Return cachepath to local data file based on datetime.                                 |
| <code>download(**xr_kwargs)</code>                             | Confirm all data files are downloaded and available locally in the <i>cachestore</i> . |
| <code>download_dataset(times)</code>                           | Download data from data source for input times.                                        |
| <code>filename(t)</code>                                       | Construct grib filename to retrieve from GFS bucket.                                   |
| <code>is_datafile_cached(t, **xr_kwargs)</code>                | Check datafile defined by datetime for variables and pressure levels in class.         |
| <code>list_timesteps_cached(**xr_kwargs)</code>                | Get a list of data files available locally in the <i>cachestore</i> .                  |
| <code>list_timesteps_not_cached(**xr_kwargs)</code>            | Get a list of data files not available locally in the <i>cachestore</i> .              |
| <code>open_dataset(disk_paths, **xr_kwargs)</code>             | Open multi-file dataset in xarray.                                                     |
| <code>open_metdataset([dataset, xr_kwargs])</code>             | Open MetDataset from data source.                                                      |
| <code>set_metadata(ds)</code>                                  | Set met source metadata on <code>ds.attrs</code> .                                     |

## Attributes

|                                        |                                                                                                                                               |
|----------------------------------------|-----------------------------------------------------------------------------------------------------------------------------------------------|
| <code>client</code>                    | S3 client for accessing GFS bucket                                                                                                            |
| <code>grid</code>                      | Lat / Lon grid spacing.                                                                                                                       |
| <code>cachestore</code>                | Cache store for intermediates while processing data source If None, cache is turned off.                                                      |
| <code>show_progress</code>             | Show progress bar when downloading files from AWS                                                                                             |
| <code>forecast_time</code>             | Base time of the previous GFS forecast based on input times                                                                                   |
| <code>forecast_path</code>             | Construct forecast path in bucket for <i>forecast_time</i> .                                                                                  |
| <code>hash</code>                      | Generate a unique hash for this datasources.                                                                                                  |
| <code>is_single_level</code>           | Return True if the datasources is single level data.                                                                                          |
| <code>paths</code>                     | Path to local source files to load.                                                                                                           |
| <code>pressure_level_variables</code>  | GFS pressure level parameters.                                                                                                                |
| <code>pressure_levels</code>           | List of pressure levels.                                                                                                                      |
| <code>single_level_variables</code>    | GFS surface level parameters.                                                                                                                 |
| <code>supported_pressure_levels</code> | Get pressure levels available.                                                                                                                |
| <code>supported_variables</code>       | Parameters available from data source.                                                                                                        |
| <code>timesteps</code>                 | List of individual timesteps from data source derived from <code>time</code> Use <code>parse_time()</code> to handle <code>TimeInput</code> . |
| <code>variable_shortnames</code>       | Return a list of variable short names.                                                                                                        |
| <code>variable_standardnames</code>    | Return a list of variable standard names.                                                                                                     |
| <code>variables</code>                 | Variables requested from data source Use <code>parse_variables()</code> to handle <code>VariableInput</code> .                                |

### `cache_dataset(dataset)`

Cache data from data source.

**Parameters**

**dataset** (`xarray.Dataset`) – Dataset loaded from remote API or local files. The dataset must have the same format as the original data source API or files.

**cachestore**

Cache store for intermediates while processing data source. If None, cache is turned off.

**client**

S3 client for accessing GFS bucket

**create\_cachepath(*t*)**

Return cachepath to local data file based on datetime.

**Parameters**

**t** (`datetime`) – Datetime of datafile

**Returns**

`str` – Path to cached data file

**download\_dataset(*times*)**

Download data from data source for input times.

**Parameters**

**times** (`list[datetime]`) – List of datetimes to download a store in cache

**filename(*t*)**

Construct grib filename to retrieve from GFS bucket.

String template:

`gfs.tCCz.pgrb2.GGGG.FFFF`

- CC is the model cycle runtime (i.e. 00, 06, 12, 18)
- GGGG is the grid spacing
- FFF is the forecast hour of product from 000 - 384

**Parameters**

**t** (`datetime`) – Timestep to download

**Returns**

`str` – Forecast filenames to retrieve from GFS bucket.

**References**

- <https://www.nco.ncep.noaa.gov/pmb/products/gfs/>

**property forecast\_path**

Construct forecast path in bucket for `forecast_time`.

String template:

`GFS_FORECAST_BUCKET/gfs.YYYYMMDD/HH/atmos/{filename}`”

**Returns**

`str` – Bucket prefix for forecast files.

**forecast\_time**

Base time of the previous GFS forecast based on input times

**grid**

Lat / Lon grid spacing. One of [0.25, 0.5, 1]

**property hash**

Generate a unique hash for this datasource.

**Returns**

`str` – Unique hash for met instance (sha1)

**open\_metdataset**(*dataset=None, xr\_kwargs=None, \*\*kwargs*)

Open MetDataset from data source.

This method should download / load any required datafiles and returns a MetDataset of the multi-file dataset opened by xarray.

**Parameters**

- **dataset** (`xr.Dataset` | `None`, *optional*) – Input `xr.Dataset` loaded manually. The dataset must have the same format as the original data source API or files.
- **xr\_kwargs** (`dict[str, Any]` | `None`, *optional*) – Dictionary of keyword arguments passed into `xarray.open_mfdataset()` when opening files. Examples include “chunks”, “engine”, “parallel”, etc. Ignored if `dataset` is input.
- **\*\*kwargs** (`Any`) – Keyword arguments passed through directly into `MetDataset` constructor.

**Returns**

`MetDataset` – Meteorology dataset

**See also:**

`xarray.open_mfdataset()`

**property pressure\_level\_variables**

GFS pressure level parameters.

**Returns**

`list[MetVariable]` | `None` – List of `MetVariable` available in datasource

**set\_metadata**(*ds*)

Set met source metadata on `ds.attrs`.

This is called within the `open_metdataset()` method to set metadata on the returned `MetDataset` instance.

**Parameters**

**ds** (`xr.Dataset` | `MetDataset`) – Dataset to set metadata on. Mutated in place.

**show\_progress**

Show progress bar when downloading files from AWS

**property single\_level\_variables**

GFS surface level parameters.

**Returns**

`list[MetVariable]` | `None` – List of `MetVariable` available in datasource

**property supported\_pressure\_levels**

Get pressure levels available.

**Returns**

`list[int]` – List of integer pressure level values

**pycontrails.datalib.gfs.variables**

GFS Parameter Support.

Parameter definitions:

- Reanalysis
- Surface
- Pressure Levels

**11.2.3 ARCO ERA5**

*datalib.ecmwf.arco\_era5*

Support for ARCO ERA5.

**pycontrails.datalib.ecmwf.arco\_era5**

Support for ARCO ERA5.

This module supports:

- Downloading ARCO ERA5 model level data for specific times and pressure level variables.
- Downloading ARCO ERA5 single level data for specific times and single level variables.
- Interpolating model level data to a target lat-lon grid and pressure levels.
- Local caching of the downloaded and interpolated data as netCDF files.
- Opening cached data as a *pycontrails.MetDataset* object.

This module requires the following additional dependencies:

- *metview* (binaries and python bindings)
- *gcsfs*
- *zarr*

## Functions

|                                                        |                                                                     |
|--------------------------------------------------------|---------------------------------------------------------------------|
| <code>open_arco_era5_model_level_data(t, ...)</code>   | Open ARCO ERA5 model level data for a specific time and variables.  |
| <code>open_arco_era5_single_level(t, variables)</code> | Open ARCO ERA5 single level data for a specific date and variables. |

## Classes

|                                                                |                                                                |
|----------------------------------------------------------------|----------------------------------------------------------------|
| <code>ARCOERA5(time, variables[, pressure_levels, ...])</code> | ARCO ERA5 data accessed remotely through Google Cloud Storage. |
|----------------------------------------------------------------|----------------------------------------------------------------|

```
class pycontrails.datalib.ecmwf.arco_era5.ARCOERA5(time, variables, pressure_levels=None, grid=0.25,
cachestore=<object object>, n_jobs=1,
cleanup_metview_tempfiles=True)
```

Bases: `ECMWFAPI`

ARCO ERA5 data accessed remotely through Google Cloud Storage.

This is a high-level interface to access and cache [ARCO ERA5](#) for a predefined set of times, variables, and pressure levels.

New in version 0.50.0.

### Parameters

- **time** (`TimeInput`) – Time of the data to open.
- **variables** (`VariableInput`) – List of variables to open.
- **pressure\_levels** (`PressureLevelInput`, *optional*) – Target pressure levels, [*hPa*]. For pressure level data, this should be a sorted (increasing or decreasing) list of integers. For single level data, this should be `-1`. By default, the pressure levels are set to the pressure levels at each model level between 20,000 and 50,000 ft assuming a constant surface pressure.
- **grid** (`float`, *optional*) – Target grid resolution, [*deg*]. Default is `0.25`.
- **cachestore** (`CacheStore`, *optional*) – Cache store to use. By default, a new disk cache store is used. If `None`, no caching is done.
- **n\_jobs** (`int`, *optional*) – EXPERIMENTAL: Number of parallel jobs to use for downloading data. By default, `1`.
- **cleanup\_metview\_tempfiles** (`bool`, *optional*) – If `True`, cleanup all `TEMP_DIRECTORY/tmp*.grib` files. Implementation is brittle and may not work on all systems. By default, `True`.



## References

[Carver and Merose, 2023]

### See also:

`open_arco_era5_model_level_data()`, `open_arco_era5_single_level()`

### `create_cachepath(t)`

Return cachepath to local data file based on datetime.

#### Parameters

`t` (datetime) – Datetime of datafile

#### Returns

`str` – Path to cached data file

### `download_dataset(times)`

Download data from data source for input times.

#### Parameters

`times` (list[datetime]) – List of datetimes to download a store in cache

### `grid`

Lat / Lon grid spacing

### `open_metdataset(dataset=None, xr_kwargs=None, **kwargs)`

Open MetDataset from data source.

This method should download / load any required datafiles and returns a MetDataset of the multi-file dataset opened by xarray.

#### Parameters

- `dataset` (`xr.Dataset` | `None`, *optional*) – Input `xr.Dataset` loaded manually. The dataset must have the same format as the original data source API or files.
- `xr_kwargs` (`dict[str, Any]` | `None`, *optional*) – Dictionary of keyword arguments passed into `xarray.open_mfdataset()` when opening files. Examples include “chunks”, “engine”, “parallel”, etc. Ignored if `dataset` is input.
- `**kwargs` (`Any`) – Keyword arguments passed through directly into `MetDataset` constructor.

#### Returns

`MetDataset` – Meteorology dataset

### See also:

`xarray.open_mfdataset()`

### `paths`

Path to local source files to load. Set to the paths of files cached in cachestore if no paths input is provided on init.

### `property pressure_level_variables`

Variables available in the ARCO ERA5 model level data.

#### Returns

`list[MetVariable]` | `None` – List of `MetVariable` available in datasource

**pressure\_levels**

List of pressure levels. Set to [-1] for data without level coordinate. Use `parse_pressure_levels()` to handle `PressureLevelInput`.

**set\_metadata(ds)**

Set met source metadata on `ds.attrs`.

This is called within the `open_metdataset()` method to set metadata on the returned `MetDataset` instance.

**Parameters**

**ds** (`xr.Dataset` | `MetDataset`) – Dataset to set metadata on. Mutated in place.

**property single\_level\_variables**

Variables available in the ARCO ERA5 single level data.

**Returns**

`list[MetVariable]` | `None` – List of `MetVariable` available in datasource

**timesteps**

List of individual timesteps from data source derived from `time` Use `parse_time()` to handle `TimeInput`.

**variables**

Variables requested from data source Use `parse_variables()` to handle `VariableInput`.

```
pycontrails.datalib.ecmwf.arco_era5.open_arco_era5_model_level_data(t, variables,  
                                                                    pressure_levels, grid)
```

Open ARCO ERA5 model level data for a specific time and variables.

This function downloads moisture, wind, and surface data from the [ARCO ERA5](#) Zarr stores and interpolates the data to a target grid and pressure levels.

This function requires the `metview` package to be installed. It is not available as an optional `pycontrails` dependency, and instead must be installed manually.

**Parameters**

- **t** (`datetime.datetime`) – Time of the data to open.
- **variables** (`list[met_var.MetVariable]`) – List of variables to open. Unsupported variables are ignored.
- **pressure\_levels** (`list[int]`) – Target pressure levels, [*hPa*]. For `metview` compatibility, this should be a sorted (increasing or decreasing) list of integers. Floating point values are treated as integers in `metview`.
- **grid** (`float`) – Target grid resolution, [*deg*]. A value of 0.25 is recommended.

**Returns**

`xarray.Dataset` – Dataset with the requested variables on the target grid and pressure levels. Data is reformatted for `MetDataset` conventions. Data **is not** cached.

## References

- [Carver and Merose, 2023]
- ARCO ERA5 moisture workflow
- Model Level Walkthrough
- Surface Reanalysis Walkthrough

`pycontrails.datalib.ecmwf.arco_era5.open_arco_era5_single_level(t, variables)`

Open ARCO ERA5 single level data for a specific date and variables.

### Parameters

- `t` (`datetime.date`) – Date of the data to open.
- `variables` (`list[met_var.MetVariable]`) – List of variables to open.

### Returns

`xarray.Dataset` – Dataset with the requested variables. Data is reformatted for `MetDataset` conventions. Data **is not** cached.

### Raises

**FileNotFoundError** – If the variable is not found at the requested date. This could indicate that the variable is not available in the ARCO ERA5 dataset, or that the time requested is outside the available range.

## 11.2.4 GOES

*datalib.goes*

Support for GOES access and analysis.

### pycontrails.datalib.goes

Support for GOES access and analysis.

### Resources

- GOES 16/18 on GCP notes
- GOES on AWS notes
- Scan Mode information and timing
- Current position of the MESO1 sector
- Current position of the MESO2 sector
- Historical Mesoscale regions
- Real time GOES data quality

## Module Attributes

|                                    |                                                                     |
|------------------------------------|---------------------------------------------------------------------|
| <code>DEFAULT_CHANNELS</code>      | Default channels to use if none are specified.                      |
| <code>GOES_SCAN_MODE_CHANGE</code> | The time at which the GOES scan mode changed from mode 3 to mode 6. |

## Functions

|                                                           |                                                                                    |
|-----------------------------------------------------------|------------------------------------------------------------------------------------|
| <code>extract_goes_visualization(da[, ...])</code>        | Extract artifacts for visualizing GOES data with the given color scheme.           |
| <code>gcs_goes_path(time, region[, channels, ...])</code> | Return GCS paths to GOES data at the given time for the given region and channels. |
| <code>to_ash(da[, convention])</code>                     | Compute 3d RGB array for the ASH color scheme.                                     |
| <code>to_true_color(da[, gamma])</code>                   | Compute 3d RGB array for the true color scheme.                                    |

## Classes

|                                                                |                                    |
|----------------------------------------------------------------|------------------------------------|
| <code>GOES([region, channels, cachestore, goes_bucket])</code> | Support for GOES-16 data handling. |
| <code>GOESRegion(value[, names, module, qualname, ...])</code> | GOES Region of interest.           |

`pycontrails.datalib.goes.DEFAULT_CHANNELS = ('C11', 'C14', 'C15')`

Default channels to use if none are specified. These are the channels required by the SEVIRI (MIT) ash color scheme.

`class pycontrails.datalib.goes.GOES(region=GOESRegion.F, channels=None, cachestore=<object object>, goes_bucket='gcp-public-data-goes-16')`

Bases: `object`

Support for GOES-16 data handling.

### Parameters

- **region** (`GOESRegion` | `str = {"F", "C", "M1", "M2"}`) – GOES Region of interest. Uses the following conventions.
  - F: Full Disk
  - C: CONUS
  - M1: Mesoscale 1
  - M2: Mesoscale 2
- **channels** (`str` | `set[str]` | `None`) – Set of channels or bands for CMIP data. The 16 possible channels are represented by the strings “C01” to “C16”. For the SEVIRI ash color scheme, set `channels=("C11", "C14", "C15")`. For the true color scheme, set `channels=("C01", "C02", "C03")`. By default, the channels required by the SEVIRI ash color scheme are used. The channels must have a common horizontal resolution. The resolutions are:
  - C01: 1.0 km
  - C02: 0.5 km (treated as 1.0 km)

- C03: 1.0 km
- C04: 2.0 km
- C05: 1.0 km
- C06 - C16: 2.0 km
- **cachestore** (`cache.CacheStore` | `None`) – Cache store for GOES data. If `None`, data is downloaded directly into memory. By default, a `cache.DiskCacheStore` is used.
- **goes\_bucket** (`str = "gcp-public-data-goes-16"`) – GCP bucket for GOES data. AWS access is not supported.

**See also:**

[GOESRegion](#), [gcs\\_goes\\_path](#)

**Examples**

```
>>> goes = GOES(region="M1", channels=("C11", "C14"))
>>> da = goes.get("2021-04-03 02:10:00")
>>> da.shape
(2, 500, 500)
```

```
>>> da.dims
('band_id', 'y', 'x')
```

```
>>> da.band_id.values
array([11, 14], dtype=int32)
```

```
>>> # Print out a sample of the data
>>> da.sel(band_id=11).isel(x=slice(0, 50, 10), y=slice(0, 50, 10)).values
array([[266.8644 , 265.50812, 271.5592 , 271.45486, 272.75897],
       [250.53697, 273.28064, 273.80225, 270.77673, 274.8977 ],
       [272.8633 , 272.65466, 271.5592 , 274.01093, 273.12415],
       [274.16742, 274.11523, 276.5148 , 273.85443, 270.51593],
       [274.84555, 275.15854, 272.60248, 270.67242, 272.23734]],
      dtype=float32)
```

```
>>> # The data has been cached locally
>>> assert goes.cachestore.listdir()
```

```
>>> # Download GOES data directly into memory by setting cachestore=None
>>> goes = GOES(region="M2", channels=("C11", "C12", "C13"), cachestore=None)
>>> da = goes.get("2021-04-03 02:10:00")
```

```
>>> da.shape
(3, 500, 500)
```

```
>>> da.dims
('band_id', 'y', 'x')
```

```
>>> da.band_id.values
array([11, 12, 13], dtype=int32)
```

```
>>> da.attrs["long_name"]
'ABI L2+ Cloud and Moisture Imagery brightness temperature'
```

```
>>> da.sel(band_id=11).values
array([[251.31944, 249.59802, 249.65018, ..., 270.30725, 270.51593,
        269.83777],
       [250.53697, 249.0242 , 249.12854, ..., 270.15076, 270.30725,
        269.73346],
       [249.1807 , 249.33719, 251.99757, ..., 270.15076, 270.20294,
        268.7945 ],
       ...,
       [277.24512, 277.29727, 277.45377, ..., 274.42822, 274.11523,
        273.7501 ],
       [277.24512, 277.45377, 278.18408, ..., 274.6369 , 274.01093,
        274.06308],
       [276.8278 , 277.14078, 277.7146 , ..., 274.6369 , 273.9066 ,
        274.16742]], dtype=float32)
```

**gcs\_goes\_path**(*time*, *channels=None*)

Return GCS paths to GOES data at given time.

Presently only supported for GOES data whose scan time minute coincides with the minute of the time parameter.

**Parameters**

- **time** (`datetime.datetime`) – Time of GOES data.
- **channels** (`set[str] | None`) – Set of channels or bands for CMIP data. If None, the `channels` attribute is used.

**Returns**

`list[str]` – List of GCS paths to GOES data.

**get**(*time*)

Return GOES data at given time.

**Parameters**

**time** (`datetime.datetime | str`) – Time of GOES data. This should be a timezone-naive datetime object or an ISO 8601 formatted string.

**Returns**

`xarray.DataArray` – DataArray of GOES data with coordinates:

- `band_id`: Channel or band ID
- `x`: GOES x-coordinate
- `y`: GOES y-coordinate

**class** `pycontrails.datalib.goes.GOESRegion`(*value*, *names=None*, \*, *module=None*, *qualname=None*, *type=None*, *start=1*, *boundary=None*)

Bases: `Enum`

GOES Region of interest.

Uses the following conventions.

- F: Full Disk
- C: CONUS
- M1: Mesoscale 1
- M2: Mesoscale 2

**C = 2**

**F = 1**

**M1 = 3**

**M2 = 4**

```
pycontrails.datalib.goes.GOES_SCAN_MODE_CHANGE = datetime.datetime(2019, 4, 2, 16, 0)
```

The time at which the GOES scan mode changed from mode 3 to mode 6. This is used to determine the scan time resolution. See [GOES ABI scan information](#).

```
pycontrails.datalib.goes.extract_goes_visualization(da, color_scheme='ash',
                                                    ash_convention='SEVIRI', gamma=2.2)
```

Extract artifacts for visualizing GOES data with the given color scheme.

#### Parameters

- **da** (`xarray.DataArray`) – DataArray of GOES data as returned by `GOES.get()`. Must have the channels required by `to_ash()`.
- **color\_scheme** (str = {"ash", "true"}) – Color scheme to use for visualization.
- **ash\_convention** (str = {"SEVIRI", "standard"}) – Passed into `to_ash()`. Only used if `color_scheme="ash"`.
- **gamma** (float = 2.2) – Passed into `to_true_color()`. Only used if `color_scheme="true"`.

#### Returns

- **rgb** (`npt.NDArray[np.float32]`) – 3D RGB array of shape (height, width, 3). Any nan values are replaced with 0.
- **src\_crs** (`ccrs.Geostationary`) – The Geostationary projection built from the GOES metadata.
- **src\_extent** (tuple[float, float, float, float]) – Extent of GOES data in the Geostationary projection

```
pycontrails.datalib.goes.gcs_goes_path(time, region, channels=None, bucket='gcp-public-data-goes-16',
                                       fs=None)
```

Return GCS paths to GOES data at the given time for the given region and channels.

Presently only supported for GOES data whose scan time minute coincides with the minute of the time parameter.

#### Parameters

- **time** (`datetime.datetime`) – Time of GOES data. This should be a timezone-naive date-time object or an ISO 8601 formatted string.
- **region** (`GOESRegion`) – GOES Region of interest.

- **channels** (str | Iterable[str]) – Set of channels or bands for CMIP data. The 16 possible channels are represented by the strings “C01” to “C16”. For the SEVIRI ash color scheme, set `channels=("C11", "C14", "C15")`. For the true color scheme, set `channels=("C01", "C02", "C03")`. By default, the channels required by the SEVIRI ash color scheme are used.

**Returns**

list[str] – List of GCS paths to GOES data.

**Examples**

```
>>> from pprint import pprint
>>> t = datetime.datetime(2023, 4, 3, 2, 10)
```

```
>>> paths = gcs_goes_path(t, GOESRegion.F, channels=("C11", "C12", "C13"))
>>> pprint(paths)
['gcp-public-data-goes-16/ABI-L2-CMIPF/2023/093/02/OR_ABI-L2-CMIPF-M6C11_G16_
↪s20230930210203_e20230930219511_c20230930219586.nc',
'gcp-public-data-goes-16/ABI-L2-CMIPF/2023/093/02/OR_ABI-L2-CMIPF-M6C12_G16_
↪s20230930210203_e20230930219516_c20230930219596.nc',
'gcp-public-data-goes-16/ABI-L2-CMIPF/2023/093/02/OR_ABI-L2-CMIPF-M6C13_G16_
↪s20230930210203_e20230930219523_c20230930219586.nc']
```

```
>>> paths = gcs_goes_path(t, GOESRegion.C, channels=("C11", "C12", "C13"))
>>> pprint(paths)
['gcp-public-data-goes-16/ABI-L2-CMIPC/2023/093/02/OR_ABI-L2-CMIPC-M6C11_G16_
↪s20230930211170_e20230930213543_c20230930214055.nc',
'gcp-public-data-goes-16/ABI-L2-CMIPC/2023/093/02/OR_ABI-L2-CMIPC-M6C12_G16_
↪s20230930211170_e20230930213551_c20230930214045.nc',
'gcp-public-data-goes-16/ABI-L2-CMIPC/2023/093/02/OR_ABI-L2-CMIPC-M6C13_G16_
↪s20230930211170_e20230930213557_c20230930214065.nc']
```

```
>>> t = datetime.datetime(2023, 4, 3, 2, 11)
>>> paths = gcs_goes_path(t, GOESRegion.M1, channels="C01")
>>> pprint(paths)
['gcp-public-data-goes-16/ABI-L2-CMIPM/2023/093/02/OR_ABI-L2-CMIPM1-M6C01_G16_
↪s20230930211249_e20230930211309_c20230930211386.nc']
```

`pycontrails.datalib.goes.to_ash(da, convention='SEVIRI')`

Compute 3d RGB array for the ASH color scheme.

**Parameters**

- **da** (`xarray.DataArray`) – DataArray of GOES data with appropriate channels.
- **convention** (str = {"SEVIRI", "standard"}) – Convention for color space.
  - SEVIRI convention requires channels C11, C14, C15. Used in [Kulik, 2019].
  - Standard convention requires channels C11, C13, C14, C15

**Returns**

`npt.NDArray[np.float32]` – 3d RGB array with ASH color scheme according to convention.



## References

- Ash RGB quick guide (the color space and color interpretations)
- [SEVIRI RGB Cal Module - Part II, n.d.]
- [Kulik, 2019]

## Examples

```
>>> goes = GOES(region="M2", channels=("C11", "C14", "C15"))
>>> da = goes.get("2022-10-03 04:34:00")
>>> rgb = to_ash(da)
>>> rgb.shape
(500, 500, 3)
```

```
>>> rgb[0, 0, :]
array([0.0127004 , 0.22793579, 0.3930847 ], dtype=float32)
```

`pycontrails.datalib.goes.to_true_color(da, gamma=2.2)`

Compute 3d RGB array for the true color scheme.

### Parameters

- **da** (`xarray.DataArray`) – DataArray of GOES data with channels C01, C02, C03.
- **gamma** (float = 2.2) – Gamma correction for the RGB channels.

### Returns

`npt.NDArray[np.float32]` – 3d RGB array with true color scheme.

## References

- Unidata's true color recipe

## 11.3 Models

### 11.3.1 Base Classes

|                                               |                                          |
|-----------------------------------------------|------------------------------------------|
| <code>Model</code> ([met, params])            | Base class for physical models.          |
| <code>ModelParams</code> ([copy_source, ...]) | Class for constructing model parameters. |

## pycontrails.Model

**class** pycontrails.**Model**(*met=None, params=None, \*\*params\_kwargs*)

Bases: *ABC*

Base class for physical models.

Implementing classes must implement the *eval()* method

**\_\_init\_\_**(*met=None, params=None, \*\*params\_kwargs*)

### Methods

|                                                                     |                                                                             |
|---------------------------------------------------------------------|-----------------------------------------------------------------------------|
| <i>__init__</i> ([ <i>met, params</i> ])                            |                                                                             |
| <i>downselect_met</i> ()                                            | Downselect <i>met</i> domain to the max/min bounds of <i>source</i> .       |
| <i>eval</i> ([ <i>source</i> ])                                     | Abstract method to handle evaluation.                                       |
| <i>get_source_param</i> ( <i>key</i> [, <i>default, set_attr</i> ]) | Get source data with default set by parameter key.                          |
| <i>require_met</i> ()                                               | Ensure that <i>met</i> is a MetDataset.                                     |
| <i>require_source_type</i> ( <i>type_</i> )                         | Ensure that <i>source</i> is <i>type_</i> .                                 |
| <i>set_source</i> ([ <i>source</i> ])                               | Attach original or copy of input <i>source</i> to <i>source</i> .           |
| <i>set_source_met</i> ([ <i>optional, variable</i> ])               | Ensure or interpolate each required <i>met_variables</i> on <i>source</i> . |
| <i>transfer_met_source_attrs</i> ([ <i>source</i> ])                | Transfer met source metadata from <i>met</i> to <i>source</i> .             |
| <i>update_params</i> ([ <i>params</i> ])                            | Update model parameters on <i>params</i> .                                  |

### Attributes

|                                |                                                                                |
|--------------------------------|--------------------------------------------------------------------------------|
| <i>params</i>                  | Instantiated model parameters, in dictionary form                              |
| <i>met</i>                     | Meteorology data                                                               |
| <i>source</i>                  | Data evaluated in model                                                        |
| <i>hash</i>                    | Generate a unique hash for model instance.                                     |
| <i>interp_kwargs</i>           | Shortcut to create interpolation arguments from <i>params</i> .                |
| <i>long_name</i>               | Get long name descriptor, annotated on <i>xr.DataArray</i> outputs.            |
| <i>met_required</i>            | Require meteorology is not None on <i>__init__</i> ()                          |
| <i>name</i>                    | class `Flight` .                                                               |
| <i>met_variables</i>           | Required meteorology pressure level variables.                                 |
| <i>processed_met_variables</i> | Set of required parameters if processing already complete on <i>met</i> input. |
| <i>optional_met_variables</i>  | Optional meteorology variables                                                 |

#### default\_params

alias of *ModelParams*

#### downselect\_met()

Downselect *met* domain to the max/min bounds of *source*.

Override this method if special handling is needed in *met* down-selection.

- `source` must be defined before calling `downselect_met()`.
- This method copies and re-assigns `met` using `met.copy()` to avoid side-effects.

#### Raises

- **ValueError** – Raised if `source` is not defined. Raised if `source` is not a `GeoVectorDataset`.
- **TypeError** – Raised if `met` is not a `MetDataset`.

**abstract eval**(`source=None, **params`)

Abstract method to handle evaluation.

Implementing classes should override call signature to overload `source` inputs and model outputs.

#### Parameters

- **source** (`ModelInput`, *optional*) – Dataset defining coordinates to evaluate model. Defined by implementing class, but must be a subset of `ModelInput`. If `None`, `met` is assumed to be evaluation points.
- **\*\*params** (`Any`) – Overwrite model parameters before evaluation.

#### Returns

`ModelOutput` – Return type depends on implementing model

**get\_source\_param**(`key`, `default=<object object>`, `*`, `set_attr=True`)

Get source data with default set by parameter key.

Retrieves data with the following hierarchy:

1. `source.data[key]`. Returns `np.ndarray` | `xr.DataArray`.
2. `source.attrs[key]`
3. `params[key]`
4. `default`

In case 3., the value of `params[key]` is attached to `source.attrs[key]`.

#### Parameters

- **key** (`str`) – Key to retrieve
- **default** (`Any`, *optional*) – Default value if key is not found.
- **set\_attr** (`bool`, *optional*) – If `True` (default), set `source.attrs[key]` to `params[key]` if found. This allows for better post model evaluation tracking.

#### Returns

`Any` – Value(s) found for key in source data, source attrs, or model params

#### Raises

**KeyError** – Raises `KeyError` if key is not found in any location and `default` is not provided.

See also:

-

#### property hash

Generate a unique hash for model instance.

#### Returns

`str` – Unique hash for model instance (sha1)

**property interp\_kwargs**

Shortcut to create interpolation arguments from *params*.

**Returns**

dict[str, Any] – Dictionary with keys

- "method"
- "bounds\_error"
- "fill\_value"
- "localize"
- "use\_indices"
- "q\_method"

as determined by *params*.

**abstract property long\_name**

Get long name descriptor, annotated on `xr.DataArray` outputs.

**met**

Meteorology data

**met\_required = False**

Require meteorology is not None on `__init__()`

**met\_variables**

Required meteorology pressure level variables. Each element in the list is a `MetVariable` or a `tuple[MetVariable]`. If element is a `tuple[MetVariable]`, the variable depends on the data source. Only one variable in the tuple is required.

**abstract property name**

class`Flight`.

**Type**

Get model name for use as a data key in `xr.DataArray` or

**optional\_met\_variables**

Optional meteorology variables

**params**

Instantiated model parameters, in dictionary form

**processed\_met\_variables**

Set of required parameters if processing already complete on `met` input.

**require\_met()**

Ensure that *met* is a `MetDataset`.

**Returns**

`MetDataset` – Returns reference to *met*. This is helpful for type narrowing *met* when meteorology is required.

**Raises**

`ValueError` – Raises when *met* is None.

**require\_source\_type**(*type\_*)

Ensure that *source* is *type\_*.

**Returns**

*\_Source* – Returns reference to *source*. This is helpful for type narrowing *source* to specific type(s).

**Raises**

**ValueError** – Raises when *source* is not *\_type\_*.

**set\_source**(*source=None*)

Attach original or copy of input source to *source*.

**Parameters**

**source** (*MetDataset* | *GeoVectorDataset* | *Flight* | *Iterable[Flight]* | *None*) – Parameter source passed in *eval()*. If *None*, an empty *MetDataset* with coordinates like *met* is set to *source*.

**See also:**

-

meth:*eval*

**set\_source\_met**(*optional=False, variable=None*)

Ensure or interpolate each required *met\_variables* on *source*.

For each variable in *met\_variables*, check *source* for data variable with the same name.

For *GeoVectorDataset* sources, try to interpolate *met* if variable does not exist.

For *MetDataset* sources, try to get data from *met* if variable does not exist.

**Parameters**

- **optional** (*bool, optional*) – Include *optional\_met\_variables*
- **variable** (*MetVariable* | *Sequence[MetVariable]* | *None, optional*) – *MetVariable* to set, from *met\_variables*. If *None*, set all variables in *met\_variables* and *optional\_met\_variables* if *optional* is *True*.

**Raises**

- **ValueError** – Variable does not exist and *source* is a *MetDataset*.
- **KeyError** – Variable not found in *source* or *met*.

**source**

Data evaluated in model

**transfer\_met\_source\_attrs**(*source=None*)

Transfer met source metadata from *met* to *source*.

**update\_params**(*params=None, \*\*params\_kwargs*)

Update model parameters on *params*.

**Parameters**

- **params** (*dict[str, Any], optional*) – Model parameters to update, as dictionary. Defaults to *{}*
- **\*\*params\_kwargs** (*Any*) – Override keys in *params* with keyword arguments.

## pycontrails.ModelParams

```
class pycontrails.ModelParams(copy_source=True, interpolation_method='linear',
                              interpolation_bounds_error=False, interpolation_fill_value=nan,
                              interpolation_localize=False, interpolation_use_indices=False,
                              interpolation_q_method=None, verify_met=True, downselect_met=True,
                              met_longitude_buffer=(0.0, 0.0), met_latitude_buffer=(0.0, 0.0),
                              met_level_buffer=(0.0, 0.0), met_time_buffer=(numpy.timedelta64(0, 'h'),
                              numpy.timedelta64(0, 'h'))
```

Bases: `object`

Class for constructing model parameters.

Implementing classes must still use the `@dataclass` operator.

```
__init__(copy_source=True, interpolation_method='linear', interpolation_bounds_error=False,
          interpolation_fill_value=nan, interpolation_localize=False, interpolation_use_indices=False,
          interpolation_q_method=None, verify_met=True, downselect_met=True,
          met_longitude_buffer=(0.0, 0.0), met_latitude_buffer=(0.0, 0.0), met_level_buffer=(0.0, 0.0),
          met_time_buffer=(numpy.timedelta64(0, 'h'), numpy.timedelta64(0, 'h'))
```

## Methods

|                                            |                               |
|--------------------------------------------|-------------------------------|
| <code>__init__</code> ([copy_source, ...]) |                               |
| <code>as_dict</code> ()                    | Convert object to dictionary. |

## Attributes

|                                         |                                                                                                                          |
|-----------------------------------------|--------------------------------------------------------------------------------------------------------------------------|
| <code>copy_source</code>                | Copy input source data on eval                                                                                           |
| <code>downselect_met</code>             | Downselect input <code>MetDataset`</code> to region around source.                                                       |
| <code>interpolation_bounds_error</code> | If True, points lying outside interpolation will raise an error                                                          |
| <code>interpolation_fill_value</code>   | Used for outside interpolation value if <code>interpolation_bounds_error</code> is False                                 |
| <code>interpolation_localize</code>     | Experimental.                                                                                                            |
| <code>interpolation_method</code>       | Interpolation method.                                                                                                    |
| <code>interpolation_q_method</code>     | Experimental.                                                                                                            |
| <code>interpolation_use_indices</code>  | Experimental.                                                                                                            |
| <code>met_latitude_buffer</code>        | Met latitude buffer for input to <code>Flight.downselect_met()</code> , in WGS84 coordinates.                            |
| <code>met_level_buffer</code>           | Met level buffer for input to <code>Flight.downselect_met()</code> , in <code>[hPa]</code> .                             |
| <code>met_longitude_buffer</code>       | Met longitude buffer for input to <code>Flight.downselect_met()</code> , in WGS84 coordinates.                           |
| <code>met_time_buffer</code>            | Met time buffer for input to <code>Flight.downselect_met()</code> Only applies when <code>downselect_met</code> is True. |
| <code>verify_met</code>                 | Call <code>_verify_met()</code> on model instantiation.                                                                  |

**as\_dict()**

Convert object to dictionary.

We use this method instead of *dataclasses.asdict* to use a shallow/unrecursive copy. This will return values as Any instead of dict.

**Returns**

dict[str, Any] – Dictionary version of self.

**copy\_source = True**

Copy input source data on eval

**downselect\_met = True**

Downselect input MetDataset` to region around source.

**interpolation\_bounds\_error = False**

If True, points lying outside interpolation will raise an error

**interpolation\_fill\_value = nan**

Used for outside interpolation value if *interpolation\_bounds\_error* is False

**interpolation\_localize = False**

Experimental. See *pycontrails.core.interpolation*.

**interpolation\_method = 'linear'**

Interpolation method. Supported methods include “linear”, “nearest”, “slinear”, “cubic”, and “quintic”. See *scipy.interpolate.RegularGridInterpolator* for the description of each method. Not all methods are supported by all met grids. For example, the “cubic” method requires at least 4 points per dimension.

**interpolation\_q\_method = None**

Experimental. Alternative interpolation method to account for specific humidity lapse rate bias. Must be one of None, “cubic-spline”, or “log-q-log-p”. If None, no special interpolation is used for specific humidity. The “cubic-spline” method applies a custom stretching of the met interpolation table to account for the specific humidity lapse rate bias. The “log-q-log-p” method interpolates in the log of specific humidity and pressure, then converts back to specific humidity. Only used by models calling to *interpolate\_met()*.

**interpolation\_use\_indices = False**

Experimental. See *pycontrails.core.interpolation*.

**met\_latitude\_buffer = (0.0, 0.0)**

Met latitude buffer for input to *Flight.downselect\_met()*, in WGS84 coordinates. Only applies when *downselect\_met* is True.

**met\_level\_buffer = (0.0, 0.0)**

Met level buffer for input to *Flight.downselect\_met()*, in [hPa]. Only applies when *downselect\_met* is True.

**met\_longitude\_buffer = (0.0, 0.0)**

Met longitude buffer for input to *Flight.downselect\_met()*, in WGS84 coordinates. Only applies when *downselect\_met* is True.

**met\_time\_buffer = (numpy.timedelta64(0, 'h'), numpy.timedelta64(0, 'h'))**

Met time buffer for input to *Flight.downselect\_met()* Only applies when *downselect\_met* is True.

**verify\_met = True**

Call *\_verify\_met()* on model instantiation.

### 11.3.2 SAC, ISSR & PCC

|                          |                                                    |
|--------------------------|----------------------------------------------------|
| <code>models.issr</code> | Ice super-saturated regions (ISSR).                |
| <code>models.sac</code>  | Schmidt-Appleman criteria (SAC).                   |
| <code>models.pcr</code>  | Persistent contrail regions (PCR = SAC & ISSR).    |
| <code>models.pcc</code>  | Probability of persistent contrail coverage (PCC). |

#### pycontrails.models.issr

Ice super-saturated regions (ISSR).

#### Functions

|                                                              |                                        |
|--------------------------------------------------------------|----------------------------------------|
| <code>issr(air_temperature[, specific_humidity, ...])</code> | Calculate ice super-saturated regions. |
|--------------------------------------------------------------|----------------------------------------|

#### Classes

|                                             |                                                                                                    |
|---------------------------------------------|----------------------------------------------------------------------------------------------------|
| <code>ISSR([met, params])</code>            | Ice super-saturated regions over a <code>Flight</code> trajectory or <code>MetDataset</code> grid. |
| <code>ISSRParams([copy_source, ...])</code> | Default ISSR model parameters.                                                                     |

```
class pycontrails.models.issr.ISSR(met=None, params=None, **params_kwargs)
```

Bases: `Model`

Ice super-saturated regions over a `Flight` trajectory or `MetDataset` grid.

This model calculates points where the relative humidity over ice is greater than 1.

#### Parameters

**met** (`MetDataset`) – Dataset containing “air\_temperature” and “specific\_humidity” variables

#### Examples

```
>>> from datetime import datetime
>>> from pycontrails.datalib.ecmwf import ERA5
>>> from pycontrails.models.issr import ISSR
>>> from pycontrails.models.humidity_scaling import ConstantHumidityScaling
```

```
>>> # Get met data
>>> time = datetime(2022, 3, 1, 0), datetime(2022, 3, 1, 2)
>>> variables = ["air_temperature", "specific_humidity"]
>>> pressure_levels = [200, 250, 300]
>>> era5 = ERA5(time, variables, pressure_levels)
>>> met = era5.open_metdataset()
```



```
>>> # Instantiate and run model
>>> scaling = ConstantHumidityScaling(rhi_adj=0.98)
>>> model = ISSR(met, humidity_scaling=scaling)
>>> out1 = model.eval()
>>> issr1 = out1["issr"]
>>> issr1.proportion # Get proportion of values with ice supersaturation
0.11414134603859523
```

```
>>> # Run with a lower threshold
>>> out2 = model.eval(rhi_threshold=0.95)
>>> issr2 = out2["issr"]
>>> issr2.proportion
0.146647
```

### default\_params

alias of *ISSRParams*

**eval**(*source=None, \*\*params*)

Evaluate ice super-saturated regions along flight trajectory or on meteorology grid.

Changed in version 0.27.0: Humidity scaling now handled automatically. This is controlled by model parameter `humidity_scaling`.

Changed in version 0.48.0: If the source is a `MetDataset`, the returned object will also be a `MetDataset`. Previous the “issr” `MetdataArray` was returned.

#### Parameters

- **source** (`GeoVectorDataset` | `Flight` | `MetDataset` | `None`, *optional*) – Input `GeoVectorDataset` or `Flight`. If `None`, evaluates at the `met` grid points.
- **\*\*params** (`Any`) – Overwrite model parameters before eval

#### Returns

`GeoVectorDataset` | `Flight` | `MetDataset` – Returns 1 in ISSR, 0 everywhere else. Returns `np.nan` if interpolating outside meteorology grid.

#### Raises

**NotImplementedError** – Raises if input source is not supported.

**long\_name** = 'Ice super-saturated regions'

**met**

Meteorology data

```
met_variables = (MetVariable(short_name='t', standard_name='air_temperature',
long_name='Air Temperature', level_type='isobaricInhPa', ecmwf_id=130, grib1_id=11,
grib2_id=(0, 0, 0), units='K', amip='ta', description='Air temperature is the bulk
temperature of the air, not the surface (skin) temperature. '),
MetVariable(short_name='q', standard_name='specific_humidity', long_name='Specific
Humidity', level_type='isobaricInhPa', ecmwf_id=133, grib1_id=51, grib2_id=(0, 1,
0), units='kg kg**-1', amip='hus', description='Specific means per unit mass.
Specific humidity is the mass fraction of water vapor in (moist) air. '))
```

Required meteorology pressure level variables. Each element in the list is a `MetVariable` or a `tuple[MetVariable]`. If element is a `tuple[MetVariable]`, the variable depends on the data source. Only one variable in the tuple is required.

**name** = 'issr'

**params**

Instantiated model parameters, in dictionary form

**source**

Data evaluated in model

```
class pycontrails.models.issr.ISSRParams(copy_source=True, interpolation_method='linear',  
                                         interpolation_bounds_error=False,  
                                         interpolation_fill_value=nan, interpolation_localize=False,  
                                         interpolation_use_indices=False,  
                                         interpolation_q_method=None, verify_met=True,  
                                         downselect_met=True, met_longitude_buffer=(0.0, 0.0),  
                                         met_latitude_buffer=(0.0, 0.0), met_level_buffer=(0.0, 0.0),  
                                         met_time_buffer=(numpy.timedelta64(0, 'h'),  
                                         numpy.timedelta64(0, 'h')), rhi_threshold=1.0,  
                                         humidity_scaling=None)
```

Bases: [ModelParams](#)

Default ISSR model parameters.

**humidity\_scaling** = None

Humidity scaling

**rhi\_threshold** = 1.0

RHI Threshold

```
pycontrails.models.issr.issr(air_temperature, specific_humidity=None, air_pressure=None, rhi=None,  
                             rhi_threshold=1.0)
```

Calculate ice super-saturated regions.

Regions where the atmospheric relative humidity over ice is greater than 1.

Parameters `air_temperature`, `specific_humidity`, `air_pressure`, and `rhi` must have compatible shapes when defined.

Either `specific_humidity` and `air_pressure` must both be provided, or `rhi` must be provided.

**Parameters**

- **air\_temperature** ([ArrayLike](#)) – A sequence or array of temperature values, [ $K$ ].
- **specific\_humidity** ([ArrayLike](#) | None) – A sequence or array of specific humidity values, [ $kg_{H_2O} kg_{moistair}$ ] None by default.
- **air\_pressure** ([ArrayLike](#) | None) – A sequence or array of atmospheric pressure values, [ $Pa$ ]. None by default.
- **rhi** ([ArrayLike](#) | None, *optional*) – A sequence of array of RHi values, if already known. If not provided, this function will compute RHi from `air_temperature`, `specific_humidity`, and `air_pressure`. None by default.
- **rhi\_threshold** ([float](#), *optional*) – Relative humidity over ice threshold for determining ISSR state

**Returns**

[ArrayLike](#) – ISSR state of each point indexed by the parameters.

**pycontrails.models.sac**

Schmidt-Appleman criteria (SAC).

**Functions**

|                                                                |                                                                           |
|----------------------------------------------------------------|---------------------------------------------------------------------------|
| <code>T_critical_sac(T_LM, relative_humidity, G[, ...])</code> | Estimate temperature threshold for persistent contrail formation.         |
| <code>T_sat_liquid(G)</code>                                   | Calculate temperature at which liquid saturation curve has slope G.       |
| <code>T_sat_liquid_high_accuracy(G[, maxiter])</code>          | Calculate temperature at which liquid saturation curve has slope G.       |
| <code>rh_critical_sac(air_temperature, T_sat_liquid, G)</code> | Calculate critical relative humidity threshold of contrail formation.     |
| <code>sac(rh, rh_crit_sac)</code>                              | Points at which the Schmidt-Appleman Criteria is satisfied.               |
| <code>slope_mixing_line(specific_humidity, ...)</code>         | Calculate the slope of the mixing line in a temperature-humidity diagram. |

**Classes**

|                                            |                                                                |
|--------------------------------------------|----------------------------------------------------------------|
| <code>SAC([met, params])</code>            | Determine points where Schmidt-Appleman Criteria is satisfied. |
| <code>SACParams([copy_source, ...])</code> | Parameters for <code>SAC</code> .                              |

**class** `pycontrails.models.sac.SAC`(*met=None, params=None, \*\*params\_kwargs*)

Bases: `Model`

Determine points where Schmidt-Appleman Criteria is satisfied.

**Parameters**

- **met** (`MetDataset`) – Dataset containing “air\_temperature”, “specific\_humidity” variables.
- **params** (`dict[str, Any]`, *optional*) – Override `SACParams` with dictionary.
- **\*\*params\_kwargs** – Override `SACParams` with keyword arguments.

**default\_params**

alias of `SACParams`

**eval**(*source=None, \*\*params*)

Evaluate the Schmidt-Appleman criteria along flight trajectory or on meteorology grid.

Changed in version 0.27.0: Humidity scaling now handled automatically. This is controlled by model parameter `humidity_scaling`.

Changed in version 0.48.0: If the `source` is a `MetDataset`, the returned object will also be a `MetDataset`. Previous the “sac” `MetdataArray` was returned.

**Parameters**

- **source** (`GeoVectorDataset | Flight | MetDataset | None`, *optional*) – Input `GeoVectorDataset` or `Flight`. If `None`, evaluates at the `met` grid points.

- **\*\*params** (Any) – Overwrite model parameters before eval

### Returns

GeoVectorDataset | Flight | MetDataset – Returns 1 where SAC is satisfied, 0 everywhere else. Returns np.nan if interpolating outside meteorology grid.

**long\_name** = 'Schmidt-Appleman contrail formation criteria'

### met

Meteorology data

```
met_variables = (MetVariable(short_name='t', standard_name='air_temperature',
long_name='Air Temperature', level_type='isobaricInhPa', ecmwf_id=130, grib1_id=11,
grib2_id=(0, 0, 0), units='K', amip='ta', description='Air temperature is the bulk
temperature of the air, not the surface (skin) temperature.'),
MetVariable(short_name='q', standard_name='specific_humidity', long_name='Specific
Humidity', level_type='isobaricInhPa', ecmwf_id=133, grib1_id=51, grib2_id=(0, 1,
0), units='kg kg**-1', amip='hus', description='Specific means per unit mass.
Specific humidity is the mass fraction of water vapor in (moist) air.')
```

Required meteorology pressure level variables. Each element in the list is a MetVariable or a tuple[MetVariable]. If element is a tuple[MetVariable], the variable depends on the data source. Only one variable in the tuple is required.

**name** = 'sac'

### params

Instantiated model parameters, in dictionary form

### source

Data evaluated in model

```
class pycontrails.models.sac.SACParams(copy_source=True, interpolation_method='linear',
interpolation_bounds_error=False, interpolation_fill_value=nan,
interpolation_localize=False, interpolation_use_indices=False,
interpolation_q_method=None, verify_met=True,
downselect_met=True, met_longitude_buffer=(0.0, 0.0),
met_latitude_buffer=(0.0, 0.0), met_level_buffer=(0.0, 0.0),
met_time_buffer=(numpy.timedelta64(0, 'h'),
numpy.timedelta64(0, 'h')), engine_efficiency=0.3,
fuel=<factory>, humidity_scaling=None)
```

Bases: [ModelParams](#)

Parameters for [SAC](#).

**engine\_efficiency** = 0.3

Jet engine efficiency, [0 – 1]

### fuel

Fuel type. Overridden by Fuel provided on input source attributes

**humidity\_scaling** = None

Humidity scaling

```
pycontrails.models.sac.T_critical_sac(T_LM, relative_humidity, G, maxiter=10)
```

Estimate temperature threshold for persistent contrail formation.

This quantity is defined as T<sub>LC</sub> in Schumann (see reference below). Equation (11) of this paper implicitly defines T<sub>LC</sub> as the solution to the equation

$$T_{LC} = T_{LM} - (e_L(T_{LM}) - rh * e_L(T_{LC})) / G$$

For relative humidity above 0.999, the corresponding entry from `T_LM` is returned (page 10, top of the right-hand column). Otherwise, the solution to the equation above is approximated via Newton's method.

#### Parameters

- `T_LM` (*ArrayLike*) – Output of `T_sat_liquid()` calculation.
- `relative_humidity` (*ArrayLike*) – Relative humidity values
- `G` (*ArrayLike*) – Slope of the mixing line in a temperature-humidity diagram.
- `maxiter` (*int, optional*) – Passed into `scipy.optimize.newton()`. By default, 10.

#### Returns

*ArrayLike* – Critical temperature threshold values.

#### References

- [Schumann, 1996]

`pycontrails.models.sac.T_sat_liquid(G)`

Calculate temperature at which liquid saturation curve has slope `G`.

#### Parameters

`G` (*ArrayLike*) – Slope of the mixing line in a temperature-humidity diagram.

#### Returns

*ArrayLike* – Maximum threshold temperature for 100% relative humidity with respect to liquid, [K]. This can also be interpreted as the temperature at which the liquid saturation curve has slope `G`.

#### References

- [Schumann, 1996]

#### See also:

`T_sat_liquid_high_accuracy()`

#### Notes

Defined (using notation `T_LM`) in [Schumann, 1996] in the first full paragraph on page 10 as

for  $T = T_{LC}$ , the mixing line just touches [is tangent to] the saturation curve. See equation (10).

The formula used here is taken from equation (31).

`pycontrails.models.sac.T_sat_liquid_high_accuracy(G, maxiter=5)`

Calculate temperature at which liquid saturation curve has slope `G`.

The function `T_sat_liquid()` gives a first order approximation to equation (10) of the Schumann paper referenced below. This function uses Newton's method to compute the numeric solution to (10).

#### Parameters

- `G` (*ArrayLike*) – Slope of the mixing line

- **maxiter** (*int, optional*) – Passed into `scipy.optimize.newton()`. Because `T_sat_liquid` is already fairly accurate, few iterations are needed for Newton’s method to converge. By default, 5.

**Returns**

*ArrayLike* – Maximum threshold temperature for 100% relative humidity with respect to liquid, [*K*].

**References**

- [Schumann, 1996]

**See also:**

`T_sat_liquid_high()`

`pycontrails.models.sac.rh_critical_sac(air_temperature, T_sat_liquid, G)`

Calculate critical relative humidity threshold of contrail formation.

**Parameters**

- **air\_temperature** (*ArrayLike*) – A sequence or array of temperature values, [*K*]
- **T\_sat\_liquid** (*ArrayLike*) – Maximum threshold temperature for 100% relative humidity with respect to liquid, [*K*]
- **G** (*ArrayLike*) – Slope of the mixing line in a temperature-humidity diagram.

**Returns**

*ArrayLike* – Critical relative humidity of contrail formation,  $[[0 - 1]]$

**References**

- [Ponater, 2002]

`pycontrails.models.sac.sac(rh, rh_crit_sac)`

Points at which the Schmidt-Appleman Criteria is satisfied.

Parameters of type *ArrayLike* must have compatible shapes.

**Parameters**

- **rh** (*ArrayLike*) – Relative humidity values
- **rh\_crit\_sac** (*ArrayLike*) – Critical relative humidity threshold of contrail formation

**Returns**

*ArrayLike* – SAC state of each point indexed by the *ArrayLike* parameters. Returned array has floating *dtype* with values

- 0.0 signifying SAC fails
- 1.0 signifying SAC holds

NaN entries of parameters propagate into the returned array.

`pycontrails.models.sac.slope_mixing_line`(*specific\_humidity*, *air\_pressure*, *engine\_efficiency*, *ei\_h2o*, *q\_fuel*)

Calculate the slope of the mixing line in a temperature-humidity diagram.

This quantity is often notated with G in the literature.

#### Parameters

- **specific\_humidity** (*ArrayLike*) – A sequence or array of specific humidity values, [ $kg_{H_2O} kg_{air}$ ]
- **air\_pressure** (*ArrayLike*) – A sequence or array of atmospheric pressure values, [ $Pa$ ].
- **engine\_efficiency** (`float` | *ArrayLike*) – Engine efficiency, [0 – 1]
- **ei\_h2o** (`float`) – Emission index of water vapor, [ $kg kg^{-1}$ ]
- **q\_fuel** (`float`) – Specific combustion heat of fuel combustion, [ $J kg^{-1} K^{-1}$ ]

#### Returns

*ArrayLike* – Slope of the mixing line in a temperature-humidity diagram, [ $Pa K^{-1}$ ]

### pycontrails.models.pcr

Persistent contrail regions (PCR = SAC & ISSR).

Equivalent to (SAC & ISSR)

### Functions

|                                                                             |                                                     |
|-----------------------------------------------------------------------------|-----------------------------------------------------|
| <code>pcr</code> ( <i>air_temperature</i> , <i>specific_humidity</i> , ...) | Calculate regions of persistent contrail formation. |
|-----------------------------------------------------------------------------|-----------------------------------------------------|

### Classes

|                                                      |                                                          |
|------------------------------------------------------|----------------------------------------------------------|
| <code>PCR</code> ( <i>[met, params]</i> )            | Determine points with likely persistent contrails (PCR). |
| <code>PCRParams</code> ( <i>[copy_source, ...]</i> ) | Persistent Contrail Regions (PCR) parameters.            |

**class** `pycontrails.models.pcr.PCR`(*met=None*, *params=None*, *\*\*params\_kwargs*)

Bases: `Model`

Determine points with likely persistent contrails (PCR).

Intersection of Ice Super Saturated Regions (ISSR) with regions in which the Schmidt-Appleman Criteria (SAC) is satisfied.

#### Parameters

- **met** (*MetDataset*) – Dataset containing “air\_temperature”, “specific\_humidity” variables
- **params** (`dict[str, Any]`, *optional*) – Override PCR model parameters with dictionary. See `PCRGridParams` for model parameters.
- **\*\*params\_kwargs** – Override PCR model parameters with keyword arguments. See `PCRGridParams` for model parameters.

**default\_params**alias of *PCRParams***eval**(*source=None, \*\*params*)Evaluate potential contrails regions of the *met* grid.**Parameters**

- **source** (*GeoVectorDataset | Flight | MetDataset | None, optional*) – Input *GeoVectorDataset* or *Flight*. If *None*, evaluates at the *met* grid points.
- **\*\*params** (*Any*) – Overwrite model parameters.

**Returns***GeoVectorDataset | Flight | MetDataset* – Returns 1 in potential contrail regions, 0 everywhere else. Returns *np.nan* if interpolating outside meteorology grid.**long\_name = 'Persistent contrail regions'****met**

Meteorology data

```
met_variables = (MetVariable(short_name='t', standard_name='air_temperature',
long_name='Air Temperature', level_type='isobaricInhPa', ecmwf_id=130, grib1_id=11,
grib2_id=(0, 0, 0), units='K', amip='ta', description='Air temperature is the bulk
temperature of the air, not the surface (skin) temperature. '),
MetVariable(short_name='q', standard_name='specific_humidity', long_name='Specific
Humidity', level_type='isobaricInhPa', ecmwf_id=133, grib1_id=51, grib2_id=(0, 1,
0), units='kg kg**-1', amip='hus', description='Specific means per unit mass.
Specific humidity is the mass fraction of water vapor in (moist) air. '))
```

Required meteorology pressure level variables. Each element in the list is a *MetVariable* or a *tuple[MetVariable]*. If element is a *tuple[MetVariable]*, the variable depends on the data source. Only one variable in the tuple is required.

**name = 'pcr'****params**

Instantiated model parameters, in dictionary form

**source**

Data evaluated in model

```
class pycontrails.models.pcr.PCRParams(copy_source=True, interpolation_method='linear',
interpolation_bounds_error=False, interpolation_fill_value=nan,
interpolation_localize=False, interpolation_use_indices=False,
interpolation_q_method=None, verify_met=True,
downselect_met=True, met_longitude_buffer=(0.0, 0.0),
met_latitude_buffer=(0.0, 0.0), met_level_buffer=(0.0, 0.0),
met_time_buffer=(numpy.timedelta64(0, 'h'),
numpy.timedelta64(0, 'h')), rhi_threshold=1.0,
humidity_scaling=None, engine_efficiency=0.3, fuel=<factory>)
```

Bases: *SACParams, ISSRParams*

Persistent Contrail Regions (PCR) parameters.

```
pycontrails.models.pcr.pcr(air_temperature, specific_humidity, air_pressure, engine_efficiency, ei_h2o,
q_fuel)
```

Calculate regions of persistent contrail formation.



Ice Super Saturated Regions (ISSR) where the Schmidt-Appleman Criteria (SAC) is satisfied.

Parameters of type `ArrayLike` must have compatible shapes.

#### Parameters

- **air\_temperature** (*ArrayLike*) – A sequence or array of temperature values, [ $K$ ]
- **specific\_humidity** (*ArrayLike*) – A sequence or array of specific humidity values, [ $kg_{H_2O} kg_{air}^{-1}$ ]
- **air\_pressure** (*ArrayLike*) – A sequence or array of atmospheric pressure values, [ $Pa$ ].
- **engine\_efficiency** (`float` | *ArrayLike*) – Engine efficiency, [ $0 - 1$ ]
- **ei\_h2o** (`float`) – Emission index of water vapor, [ $kg kg^{-1}$ ]
- **q\_fuel** (`float`) – Specific combustion heat of fuel combustion, [ $J kg^{-1} K^{-1}$ ]

#### Returns

- **pcr** (*ArrayLike*) – PCR state of each point indexed by the *ArrayLike* parameters.
- **sac** (*ArrayLike*) – SAC state
- **issr** (*ArrayLike*) – ISSR state

### pycontrails.models.pcc

Probability of persistent contrail coverage (PCC).

#### Classes

|                                            |                                        |
|--------------------------------------------|----------------------------------------|
| <code>PCC(met, surface[, params])</code>   | Potential Contrail Coverage Algorithm. |
| <code>PCCParams([copy_source, ...])</code> | PCC Model Parameters.                  |

**class** `pycontrails.models.pcc.PCC`(*met*, *surface*, *params=None*, *\*\*params\_kwargs*)

Bases: `Model`

Potential Contrail Coverage Algorithm.

Determines the potential of ambient atmosphere to allow contrail formation at grid points.

#### Parameters

- **met** (*MetDataset*) – Dataset containing *met\_variables* variables.
- **surface** (*MetDataset*) – Surface level dataset containing “air\_pressure”.
- **params** (`dict[str, Any]`, *optional*) – Override PCC model parameters with dictionary. See `PCCParams` for model parameters.
- **\*\*params\_kwargs** – Override PCC model parameters with keyword arguments. See `PCCParams` for model parameters.

## Notes

Based on Ponater et al. (2002)

**Slingo1980**( $T, p, iwc, q, rh\_crit\_old, rh\_crit\_new$ )

Apply Slingo scheme described in Wood and Field, 1999.

Relationships between Total Water, Condensed Water, and Cloud Fraction in Stratiform Clouds Examined Using Aircraft Data

### Parameters

- **T** (`xarray:DataArray`) – Air Temperature, [ $K$ ]
- **p** (`xarray:DataArray`) – Air Pressure, [ $Pa$ ]
- **iwc** (`xarray:DataArray`) – Cloud ice water content, [ $kg\ kg^{-1}$ ]
- **q** (`xarray:DataArray`) – Specific humidity
- **rh\_crit\_old** (`xarray:DataArray`) – Critical relative humidity,  $[[0 - 1]]$
- **rh\_crit\_new** (`xarray:DataArray`) – Critical relative humidity,  $[[0 - 1]]$

### Returns

`xarray:DataArray` – Probability of cirrus formation,  $[[0 - 1]]$

**Smith1990**( $T, p, iwc, q, rh\_crit\_old, rh\_crit\_new$ )

Apply Smith Scheme described in Rap et al. (2009).

Parameterization of contrails in the UK Met OfficeClimate Model;

### Parameters

- **T** (`xarray:DataArray`) – Air Temperature, [ $K$ ]
- **p** (`xarray:DataArray`) – Air Pressure, [ $Pa$ ]
- **iwc** (`xarray:DataArray`) – Cloud ice water content, [ $kg\ kg^{-1}$ ]
- **q** (`xarray:DataArray`) – Specific humidity
- **rh\_crit\_old** (`xarray:DataArray`) – Critical relative humidity,  $[[0 - 1]]$
- **rh\_crit\_new** (`xarray:DataArray`) – Critical relative humidity,  $[[0 - 1]]$

### Returns

`xarray:DataArray` – Probability of cirrus formation,  $[[0 - 1]]$

**Sundqvist1989**( $T, p, iwc, q, rh\_crit\_old, rh\_crit\_new$ )

Apply Sundqvist scheme described in Ponater et al. (2002).

Contrails in a comprehensive global climate model: Parameterization and radiative forcing results

### Parameters

- **T** (`xarray:DataArray`) – Air Temperature, [ $K$ ]
- **p** (`xarray:DataArray`) – Air Pressure, [ $Pa$ ]
- **iwc** (`xarray:DataArray`) – Cloud ice water content, [ $kg\ kg^{-1}$ ]
- **q** (`xarray:DataArray`) – Specific humidity
- **rh\_crit\_old** (`xarray:DataArray`) – Critical relative humidity,  $[[0 - 1]]$
- **rh\_crit\_new** (`xarray:DataArray`) – Critical relative humidity,  $[[0 - 1]]$

**Returns**

`xarray:DataArray` – Probability of cirrus formation,  $[[0 - 1]]$

**b\_contr()**

Calculate critical relative humidity threshold of contrail formation.

**Returns**

`xarray.DataArray` – Critical relative humidity of contrail formation,  $[[0 - 1]]$

**Notes**

Instead of using a prescribed threshold relative humidity for `rh_crit_old` the threshold relative humidity now change with pressure.

This equation is described in Roeckner et al. 1996, Eq.57 THE ATMOSPHERIC GENERAL CIRCULATION MODEL ECHAM-4: MODEL DESCRIPTION AND SIMULATION OF PRESENT-DAY CLIMATE

**default\_params**

alias of `PCCParams`

**eval(source=None, \*\*params)**

Evaluate PCC model.

Currently only implemented to work on the met data input.

**Parameters**

- **source** (`MetDataset` | `None`, *optional*) –

**Input MetDataset.**

If `None`, evaluates at the met grid points.

- **\*\*params** (`Any`) – Overwrite model parameters before eval

**Returns**

`MetdataArray` – PCC model output

`long_name = 'Potential contrail coverage'`

```
met_variables = (MetVariable(short_name='t', standard_name='air_temperature',
long_name='Air Temperature', level_type='isobaricInhPa', ecmwf_id=130, grib1_id=11,
grib2_id=(0, 0, 0), units='K', amip='ta', description='Air temperature is the bulk
temperature of the air, not the surface (skin) temperature.'),
MetVariable(short_name='q', standard_name='specific_humidity', long_name='Specific
Humidity', level_type='isobaricInhPa', ecmwf_id=133, grib1_id=51, grib2_id=(0, 1,
0), units='kg kg**-1', amip='hus', description='Specific means per unit mass.
Specific humidity is the mass fraction of water vapor in (moist) air.'),
MetVariable(short_name='ciwc', standard_name='specific_cloud_ice_water_content',
long_name='Specific cloud ice water content', level_type='isobaricInhPa',
ecmwf_id=247, grib1_id=None, grib2_id=(0, 1, 84), units='kg kg**-1', amip=None,
description="This parameter is the mass of cloud ice particles per kilogram of the
total mass of moist air. The 'total mass of moist air' is the sum of the dry air,
water vapour, cloud liquid, cloud ice, rain and falling snow. This parameter
represents the average value for a grid box."))
```

Required meteorology pressure level variables. Each element in the list is a `MetVariable` or a `tuple[MetVariable]`. If element is a `tuple[MetVariable]`, the variable depends on the data source. Only one variable in the tuple is required.

`name = 'pcc'`

`surface`

```
class pycontrails.models.pcc.PCCParams(copy_source=True, interpolation_method='linear',
interpolation_bounds_error=False, interpolation_fill_value=nan,
interpolation_localize=False, interpolation_use_indices=False,
interpolation_q_method=None, verify_met=True,
downselect_met=True, met_longitude_buffer=(0.0, 0.0),
met_latitude_buffer=(0.0, 0.0), met_level_buffer=(0.0, 0.0),
met_time_buffer=(numpy.timedelta64(0, 'h'),
numpy.timedelta64(0, 'h')), cloud_model='Smith1990',
rh_crit_factor=0.7, fuel=<factory>, engine_efficiency=0.35,
humidity_scaling=None)
```

Bases: *ModelParams*

PCC Model Parameters.

**cloud\_model = 'Smith1990'**

Cloud model Options include “Smith1990”, “Sundqvist1989”, “Slingo1980”

**engine\_efficiency = 0.35**

Engine efficiency

**fuel**

Fuel type

**humidity\_scaling = None**

Humidity scaling

**rh\_crit\_factor = 0.7**

Critical RH Factor for the model to cirrus clouds

### 11.3.3 CoCiP

|                                                           |                                                              |
|-----------------------------------------------------------|--------------------------------------------------------------|
| <code>models.cocip.Cocip(met, rad[, params])</code>       | Contrail Cirrus Prediction Model (CoCiP).                    |
| <code>models.cocip.CocipParams([copy_source, ...])</code> | Model parameters required by the CoCiP models.               |
| <code>models.cocip.contrail_properties</code>             | Contrail Property Calculations.                              |
| <code>models.cocip.radiative_forcing</code>               | Module for calculating radiative forcing of contrail cirrus. |
| <code>models.cocip.wake_vortex</code>                     | Wave-vortex downwash functions.                              |
| <code>models.cocip.wind_shear</code>                      | Wind shear functions.                                        |

#### pycontrails.models.cocip.Cocip

```
class pycontrails.models.cocip.Cocip(met, rad, params=None, **params_kwargs)
```

Bases: *Model*

Contrail Cirrus Prediction Model (CoCiP).

Published by Ulrich Schumann *et. al.* (DLR Institute of Atmospheric Physics) in [Schumann, 2012], [Schumann *et al.*, 2012].

#### Parameters

- **met** (*MetDataset*) – Pressure level dataset containing *met\_variables* variables. See *Notes* for variable names by data source.
- **rad** (*MetDataset*) – Single level dataset containing top of atmosphere radiation fluxes. See *Notes* for variable names by data source.
- **params** (dict[str, Any], *optional*) – Override Cocip model parameters with dictionary. See CocipFlightParams for model parameters.
- **\*\*params\_kwargs** (Any) – Override Cocip model parameters with keyword arguments. See CocipFlightParams for model parameters.

## Notes

### Inputs

The required meteorology variables depend on the data source (e.g. ECMWF, GFS).

See *met\_variables* and *rad\_variables* for the list of required variables to the met and rad parameters, respectively. When an item in one of these arrays is a *tuple*, variable keys depend on data source.

The current list of required variables (labelled by "standard\_name"):

Table 3: Variable keys for pressure level data

| Parameter         | ECMWF                               | GFS                                 |
|-------------------|-------------------------------------|-------------------------------------|
| Air Temperature   | air_temperature                     | air_temperature                     |
| Specific Humidity | specific_humidity                   | specific_humidity                   |
| Eastward wind     | eastward_wind                       | eastward_wind                       |
| Northward wind    | northward_wind                      | northward_wind                      |
| Vertical velocity | lagrangian_tendency_of_air_pressure | lagrangian_tendency_of_air_pressure |
| Ice water content | specific_cloud_ice_water_content    | ice_water_mixing_ratio              |

Table 4: Variable keys for single-level radiation data

| Parameter             | ECMWF                     | GFS                       |
|-----------------------|---------------------------|---------------------------|
| Top solar radiation   | top_net_solar_radiation   | toa_upward_shortwave_flux |
| Top thermal radiation | top_net_thermal_radiation | toa_upward_longwave_flux  |

### Modifications

This implementation differs from original CoCiP (Fortran) implementation in a few places:

- This model uses aircraft performance and emissions models to calculate nvPM, fuel flow, and overall propulsion efficiency, if not already provided.
- As described in [Teoh *et al.*, 2022], this implementation sets the initial ice particle activation rate to be a function of the difference between the ambient temperature and the critical SAC threshold temperature. See `pycontrails.models.sac.T_critical_sac()`.
- Isobaric heat capacity calculation. The original model uses a constant value of  $1004 \text{ J kg}^{-1} \text{ K}^{-1}$ , whereas this model calculates isobaric heat capacity as a function of specific humidity. See `pycontrails.physics.thermo.c_pm()`.

- Solar direct radiation. The original algorithm uses ECMWF radiation variable *tisr* (top incident solar radiation) as solar direct radiation value. This implementation calculates the theoretical solar direct radiation at any arbitrary point in the atmosphere. See `pycontrails.physics.geo.solar_direct_radiation()`.
- Segment angle. The segment angle calculations for flights and contrail segments have been updated to use more precise spherical geometry instead of a triangular approximation. As the triangle approaches zero, the two calculations agree. See `pycontrails.physics.geo.segment_angle()`.
- Integration. This implementation consistently uses left-Riemann sums in the time integration of contrail segments.
- Segment length ratio. Instead of taking a geometric mean between contrail segments before/after advection, a simple ratio is computed. See `contrail_properties.segment_length_ratio()`.
- Segment energy flux. This implementation does not average spatially contiguous contrail segments when calculating the mean energy flux for the segment of interest. See `contrail_properties.mean_energy_flux_per_m()`.

This implementation is regression tested against results from [Teoh *et al.*, 2022]. See `tests/benchmark/north-atlantic-study/validate.py`.

### Outputs

NaN values may appear in model output. Specifically, `np.nan` values are used to indicate:

- Flight waypoint or contrail waypoint is not contained with the met domain.
- The variable was NOT computed during the model evaluation. For example, at flight waypoints not producing any persistent contrails, “radiative” variables (`rsr`, `olr`, `rf_sw`, `rf_lw`, `rf_net`) are not computed. Consequently, the corresponding values in the output of `eval()` are NaN. One exception to this rule is found on `ef` (energy forcing) `contrail_age` predictions. For these two “cumulative” variables, waypoints not producing any persistent contrails are assigned 0 values.

### References

- [Schumann and Wendling, 1990]
- [Schumann, 2010]
- [Voigt *et al.*, 2010]
- [Schumann *et al.*, 2011]
- [Schumann, 2012]
- [Schumann *et al.*, 2012]
- [Schumann *et al.*, 2012]
- [Schumann *et al.*, 2011]
- [Schumann *et al.*, 2015]
- [Teoh *et al.*, 2020]
- [Schumann *et al.*, 2021]
- [Schumann *et al.*, 2021]
- [Teoh *et al.*, 2022]

**See also:**

CocipFlightParams, wake\_vortex, contrail\_properties, radiative\_forcing, humidity\_scaling, Emissions, sac, tau\_cirrus

`__init__(met, rad, params=None, **params_kwargs)`

**Methods**

|                                                         |                                                                      |
|---------------------------------------------------------|----------------------------------------------------------------------|
| <code>__init__(met, rad[, params])</code>               |                                                                      |
| <code>downselect_met()</code>                           | Downselect met domain to the max/min bounds of source.               |
| <code>eval([source])</code>                             | Run CoCiP simulation on flight.                                      |
| <code>get_source_param(key[, default, set_attr])</code> | Get source data with default set by parameter key.                   |
| <code>require_met()</code>                              | Ensure that met is a MetDataset.                                     |
| <code>require_source_type(type_)</code>                 | Ensure that source is type_.                                         |
| <code>set_source([source])</code>                       | Attach original or copy of input source to source.                   |
| <code>set_source_met([optional, variable])</code>       | Ensure or interpolate each required <i>met_variables</i> on source . |
| <code>transfer_met_source_attrs([source])</code>        | Transfer met source metadata from met to source.                     |
| <code>update_params([params])</code>                    | Update model parameters on params.                                   |

**Attributes**

|                                      |                                                                            |
|--------------------------------------|----------------------------------------------------------------------------|
| <code>rad</code>                     | Radiation data formatted as a MetDataset at a single pressure level [-1]   |
| <code>contrail</code>                | Contrail evolution output from model.                                      |
| <code>contrail_dataset</code>        | xr.Dataset representation of contrail evolution.                           |
| <code>contrail_list</code>           | List of GeoVectorDataset contrail objects - one for each timestep          |
| <code>timesteps</code>               | Array of <code>numpy.datetime64</code> time steps for contrail evolution   |
| <code>hash</code>                    | Generate a unique hash for model instance.                                 |
| <code>interp_kwargs</code>           | Shortcut to create interpolation arguments from params.                    |
| <code>long_name</code>               |                                                                            |
| <code>met</code>                     | Met data is not optional                                                   |
| <code>met_required</code>            | Require meteorology is not None on <code>__init__()</code>                 |
| <code>met_variables</code>           | Required meteorology pressure level variables.                             |
| <code>name</code>                    |                                                                            |
| <code>optional_met_variables</code>  | Additional met variables used to support outputs                           |
| <code>params</code>                  | Instantiated model parameters, in dictionary form                          |
| <code>processed_met_variables</code> | Minimal set of met variables needed to run the model after pre-processing. |
| <code>rad_variables</code>           | Required single-level top of atmosphere radiation variables.               |
| <code>source</code>                  | Last Flight modeled in <code>eval()</code>                                 |

**contrail**

Contrail evolution output from model.

Set to None when no contrails are formed. Otherwise, this is a `pandas.DataFrame` describing the evolution of the contrail. Columns include:

- `waypoint`: The index of the waypoint in the original flight creating the contrail. This can be used to join the contrail DataFrame to the source.
- `formation_time`: Time of contrail formation. Agrees with the `time` column in source.
- `continuous`: Boolean indicating whether the contrail is continuous or not.
- `persistent`: Boolean indicating whether the contrail is persistent or not. A contrail segment is considered continuous if both the current and the next contrail waypoint at the same time step persist.
- `segment_length`: Length of the contrail segment, [ $m$ ].
- `sin_a`, `cos_a`: Sine and cosine of the segment angle.
- `width`, `depth`: Contrail width and depth, [ $m$ ].
- `sigma_yz`: The yz component of the covariance matrix, [ $m^2$ ]. See `contrail_properties.plume_temporal_evolution()`.
- `q_sat`: Saturation specific humidity over ice, [ $kg\ kg^{-1}$ ].
- `n_ice_per_m`: Number of ice particles per distance, [ $m^{-1}$ ].
- `iwc`: Ice water content, [ $kg_{ice}kg_{air}^{-1}$ ].
- `tau_contrail`: Optical depth of the contrail. See `contrail_properties.contrail_optical_depth()`.
- `rf_sw`, `rf_lw`, `rf_net`: Shortwave, longwave, and net instantaneous radiative forcing, [ $W\ m^{-2}$ ] at the contrail waypoint.
- `ef`: Energy forcing, [ $J$ ] at the contrail waypoint. See `contrail_properties.energy_forcing()`.

**contrail\_dataset**

`xr.Dataset` representation of contrail evolution.

**contrail\_list**

List of `GeoVectorDataset` contrail objects - one for each timestep

**default\_params**

alias of `CocipFlightParams`

**eval**(*source=None*, *\*\*params*)

Run CoCiP simulation on flight.

Simulates the formation and evolution of contrails from a Flight using the contrail cirrus prediction model (CoCiP) from Schumann (2012) [[Schumann, 2012](#)].

Changed in version 0.25.11: Previously, any waypoint not surviving the wake vortex downwash phase of CoCiP was assigned a nan-value in the `ef` array within the model output. This is no longer the case. Instead, energy forcing is set to 0.0 for all waypoints which fail to produce persistent contrails. In particular, nan values in the `ef` array are only used to indicate an out-of-met-domain waypoint. The same convention is now used for output variables `contrail_age` and `cocip` as well.

**Parameters**

- `source` (`Flight` | `Sequence[Flight]` | `None`) – Input Flight(s) to model.
- `**params` (`Any`) – Overwrite model parameters before eval.



## Returns

Flight | list[Flight] | NoReturn – Flight(s) with updated Contrail data. The model parameter “verbose\_outputs” determines the variables on the return flight object.

## References

- [Schumann, 2012]

```
long_name = 'Contrail Cirrus Prediction Model'
```

```
met_required = True
```

Require meteorology is not None on `__init__()`

```
met_variables = (MetVariable(short_name='t', standard_name='air_temperature',
long_name='Air Temperature', level_type='isobaricInhPa', ecmwf_id=130, grib1_id=11,
grib2_id=(0, 0, 0), units='K', amip='ta', description='Air temperature is the bulk
temperature of the air, not the surface (skin) temperature.'),
MetVariable(short_name='q', standard_name='specific_humidity', long_name='Specific
Humidity', level_type='isobaricInhPa', ecmwf_id=133, grib1_id=51, grib2_id=(0, 1,
0), units='kg kg**-1', amip='hus', description='Specific means per unit mass.
Specific humidity is the mass fraction of water vapor in (moist) air.'),
MetVariable(short_name='u', standard_name='eastward_wind', long_name='Eastward
Wind', level_type='isobaricInhPa', ecmwf_id=131, grib1_id=33, grib2_id=(0, 2, 2),
units='m s**-1', amip='ua', description='"Eastward" indicates a vector component
which is positive when directed eastward (negative westward). Wind is defined as a
two-dimensional (horizontal) air velocity vector, with no vertical component.'),
MetVariable(short_name='v', standard_name='northward_wind', long_name='Northward
Wind', level_type='isobaricInhPa', ecmwf_id=132, grib1_id=34, grib2_id=(0, 2, 3),
units='m s**-1', amip='va', description='"Northward" indicates a vector component
which is positive when directed northward (negative southward). Wind is defined as a
two-dimensional (horizontal) air velocity vector, with no vertical component.'),
MetVariable(short_name='w', standard_name='lagrangian_tendency_of_air_pressure',
long_name='Vertical Velocity (omega)', level_type='isobaricInhPa', ecmwf_id=135,
grib1_id=39, grib2_id=(0, 2, 8), units='Pa s**-1', amip='wap', description='The
Lagrangian tendency of air pressure, often called "omega", plays the role of the
upward component of air velocity when air pressure is being used as the vertical
coordinate. If the vertical air velocity is upwards, it is negative when expressed
as a tendency of air pressure; downwards is positive. Air pressure is the force per
unit area which would be exerted when the moving gas molecules of which the air is
composed strike a theoretical surface of any orientation.'),
(MetVariable(short_name='ciwc', standard_name='specific_cloud_ice_water_content',
long_name='Specific cloud ice water content', level_type='isobaricInhPa',
ecmwf_id=247, grib1_id=None, grib2_id=(0, 1, 84), units='kg kg**-1', amip=None,
description="This parameter is the mass of cloud ice particles per kilogram of the
total mass of moist air. The 'total mass of moist air' is the sum of the dry air,
water vapour, cloud liquid, cloud ice, rain and falling snow. This parameter
represents the average value for a grid box."), MetVariable(short_name='icmr',
standard_name='ice_water_mixing_ratio', long_name='Cloud ice water mixing ratio',
level_type='isobaricInhPa', ecmwf_id=260019, grib1_id=None, grib2_id=(0, 1, 23),
units='kg kg**-1', amip=None, description='This parameter is the mass of cloud ice
particles per kilogram of the total mass of dry air. ')))
```

Required meteorology pressure level variables. Each element in the list is a MetVariable or a tuple[MetVariable]. If element is a tuple[MetVariable], the variable depends on the data source. Only one variable in the tuple is required.

```
name = 'cocip'
```

```
optional_met_variables = ((MetVariable(short_name='z', standard_name='geopotential',
long_name='Geopotential', level_type='isobaricInhPa', ecmwf_id=129, grib1_id=6,
grib2_id=(0, 3, 4), units='m**2 s**-2', amip=None, description='Geopotential is the
sum of the specific gravitational potential energy relative to the geoid and the
specific centripetal potential energy.'), MetVariable(short_name='gh',
standard_name='geopotential_height', long_name='Geopotential Height',
level_type='isobaricInhPa', ecmwf_id=156, grib1_id=7, grib2_id=(0, 3, 5), units='m',
amip='zg', description='Geopotential is the sum of the specific gravitational
potential energy relative to the geoid and the specific centripetal potential
energy. Geopotential height is the geopotential divided by the standard acceleration
due to gravity. It is numerically similar to the altitude (or geometric height) and
not to the quantity with standard name height, which is relative to the surface.')),
(MetVariable(short_name='cc', standard_name='fraction_of_cloud_cover',
long_name='Cloud area fraction in atmosphere layer', level_type='isobaricInhPa',
ecmwf_id=248, grib1_id=None, grib2_id=(0, 6, 32), units='[0 - 1]', amip='cl',
description='This parameter is the proportion of a grid box covered by cloud (liquid
or ice) at a specific pressure level.'), MetVariable(short_name='tcc',
standard_name='total_cloud_cover_isobaric', long_name='Total cloud cover at isobaric
surface', level_type='isobaricInhPa', ecmwf_id=228164, grib1_id=None, grib2_id=(0,
6, 1), units='%', amip=None, description='This parameter is the percentage of a grid
box covered by cloud (liquid or ice) at a specific pressure level.')))
```

Additional met variables used to support outputs

Changed in version 0.48.0: Moved Geopotential from *met\_variables* to *optional\_met\_variables*

```

processed_met_variables = (MetVariable(short_name='t',
standard_name='air_temperature', long_name='Air Temperature',
level_type='isobaricInhPa', ecmwf_id=130, grib1_id=11, grib2_id=(0, 0, 0),
units='K', amip='ta', description='Air temperature is the bulk temperature of the
air, not the surface (skin) temperature. '), MetVariable(short_name='q',
standard_name='specific_humidity', long_name='Specific Humidity',
level_type='isobaricInhPa', ecmwf_id=133, grib1_id=51, grib2_id=(0, 1, 0), units='kg
kg**-1', amip='hus', description='Specific means per unit mass. Specific humidity is
the mass fraction of water vapor in (moist) air. '), MetVariable(short_name='u',
standard_name='eastward_wind', long_name='Eastward Wind',
level_type='isobaricInhPa', ecmwf_id=131, grib1_id=33, grib2_id=(0, 2, 2), units='m
s**-1', amip='ua', description='"Eastward" indicates a vector component which is
positive when directed eastward (negative westward). Wind is defined as a
two-dimensional (horizontal) air velocity vector, with no vertical component. '),
MetVariable(short_name='v', standard_name='northward_wind', long_name='Northward
Wind', level_type='isobaricInhPa', ecmwf_id=132, grib1_id=34, grib2_id=(0, 2, 3),
units='m s**-1', amip='va', description='"Northward" indicates a vector component
which is positive when directed northward (negative southward). Wind is defined as a
two-dimensional (horizontal) air velocity vector, with no vertical component. '),
MetVariable(short_name='w', standard_name='lagrangian_tendency_of_air_pressure',
long_name='Vertical Velocity (omega)', level_type='isobaricInhPa', ecmwf_id=135,
grib1_id=39, grib2_id=(0, 2, 8), units='Pa s**-1', amip='wap', description='The
Lagrangian tendency of air pressure, often called "omega", plays the role of the
upward component of air velocity when air pressure is being used as the vertical
coordinate. If the vertical air velocity is upwards, it is negative when expressed
as a tendency of air pressure; downwards is positive. Air pressure is the force per
unit area which would be exerted when the moving gas molecules of which the air is
composed strike a theoretical surface of any orientation. '),
MetVariable(short_name='tau_cirrus', standard_name='tau_cirrus', long_name='Cirrus
optical depth', level_type=None, ecmwf_id=None, grib1_id=None, grib2_id=None,
units='dimensionless', amip=None, description=None))

```

Minimal set of met variables needed to run the model after pre-processing. The intention here is that ciwv is unnecessary after tau\_cirrus has already been calculated.

#### rad

Radiation data formatted as a MetDataset at a single pressure level [-1]

```

rad_variables = ((MetVariable(short_name='tsr',
standard_name='top_net_solar_radiation', long_name='Top of atmosphere net solar
(shortwave) radiation', level_type='nominalTop', ecmwf_id=178, grib1_id=None,
grib2_id=(0, 4, 1), units='J m**-2', amip=None, description="This parameter is the
incoming solar radiation (also known as shortwave radiation) minus the outgoing
solar radiation at the top of the atmosphere. It is the amount of radiation passing
through a horizontal plane. The incoming solar radiation is the amount received from
the Sun. The outgoing solar radiation is the amount reflected and scattered by the
Earth's atmosphere and surfaceSee https://www.ecmwf.int/sites/default/files/
elibrary/2015/18490-radiation-quantities-ecmwf-model-and-mars.pdf"),
MetVariable(short_name='uswrf', standard_name='toa_upward_shortwave_flux',
long_name='Top of atmosphere upward shortwave radiation', level_type='nominalTop',
ecmwf_id=None, grib1_id=None, grib2_id=(0, 4, 193), units='W m**-2', amip=None,
description='This parameter is the outgoing shortwave (solar) radiation at the
nominal top of the atmosphere.')), (MetVariable(short_name='ttr',
standard_name='top_net_thermal_radiation', long_name='Top of atmosphere net thermal
(longwave) radiation', level_type='nominalTop', ecmwf_id=179, grib1_id=None,
grib2_id=(0, 5, 5), units='J m**-2', amip=None, description='The thermal (also known
as terrestrial or longwave) radiation emitted to space at the top of the atmosphere
is commonly known as the Outgoing Longwave Radiation (OLR). The top net thermal
radiation (this parameter) is equal to the negative of OLR.See
https://www.ecmwf.int/sites/default/files/elibrary/2015/
18490-radiation-quantities-ecmwf-model-and-mars.pdf'),
MetVariable(short_name='ulwrf', standard_name='toa_upward_longwave_flux',
long_name='Top of atmosphere upward longwave radiation', level_type='nominalTop',
ecmwf_id=None, grib1_id=None, grib2_id=(0, 5, 193), units='W m**-2', amip=None,
description='This parameter is the outgoing longwave (thermal) radiation at the
nominal top of the atmosphere.')))

```

Required single-level top of atmosphere radiation variables. Variable keys depend on data source (e.g. ECMWF, GFS).

#### timesteps

Array of `numpy.datetime64` time steps for contrail evolution

### pycontrails.models.cocip.CocipParams

```

class pycontrails.models.cocip.CocipParams(copy_source=True, interpolation_method='linear',
                                           interpolation_bounds_error=False,
                                           interpolation_fill_value=nan, interpolation_localize=False,
                                           interpolation_use_indices=False,
                                           interpolation_q_method=None, verify_met=True,
                                           downselect_met=True, met_longitude_buffer=(10.0, 10.0),
                                           met_latitude_buffer=(10.0, 10.0), met_level_buffer=(40.0,
                                           40.0), met_time_buffer=(numpy.timedelta64(0, 'h'),
                                           numpy.timedelta64(0, 'h')), process_emissions=True,
                                           dt_integration=numpy.timedelta64(30, 'm'), dz_m=200.0,
                                           effective_vertical_resolution=2000.0,
                                           smooth_true_airspeed=True,
                                           smooth_true_airspeed_window_length=7,
                                           smooth_true_airspeed_polyorder=1,
                                           humidity_scaling=None,
                                           compute_tau_cirrus_in_model_init='auto', filter_sac=True,
                                           filter_initially_persistent=True, persistent_buffer=None,
                                           verbose_outputs=False, compute_atr20=False,
                                           global_rf_to_atr20_factor=0.0151,
                                           initial_wake_vortex_depth=0.5,
                                           sedimentation_impact_factor=0.5,
                                           default_nvpm_ei_n=1000000000000000.0,
                                           wind_shear_enhancement_exponent=0.5,
                                           nvpm_ei_n_enhancement_factor=1.0,
                                           min_ice_particle_number_nvpm_ei_n=10000000000000.0,
                                           max_depth=1500.0,
                                           unterstrasser_ice_survival_fraction=False,
                                           radiative_heating_effects=False,
                                           contrail_contrail_overlapping=False, dz_overlap_m=500.0,
                                           radius_threshold_um=<factory>, habits=<factory>,
                                           habit_distributions=<factory>,
                                           rf_sw_enhancement_factor=1.0,
                                           rf_lw_enhancement_factor=1.0, min_altitude_m=6000.0,
                                           max_altitude_m=13000.0, max_seg_length_m=40000.0,
                                           max_age=numpy.timedelta64(20, 'h'), min_tau=1e-06,
                                           max_tau=10000000000.0, min_n_ice_per_m3=1000.0,
                                           max_n_ice_per_m3=1e+20)

```

Bases: [ModelParams](#)

Model parameters required by the CoCiP models.

```

__init__(copy_source=True, interpolation_method='linear', interpolation_bounds_error=False,
interpolation_fill_value=nan, interpolation_localize=False, interpolation_use_indices=False,
interpolation_q_method=None, verify_met=True, downselect_met=True,
met_longitude_buffer=(10.0, 10.0), met_latitude_buffer=(10.0, 10.0), met_level_buffer=(40.0,
40.0), met_time_buffer=(numpy.timedelta64(0, 'h'), numpy.timedelta64(0, 'h')),
process_emissions=True, dt_integration=numpy.timedelta64(30, 'm'), dz_m=200.0,
effective_vertical_resolution=2000.0, smooth_true_airspeed=True,
smooth_true_airspeed_window_length=7, smooth_true_airspeed_polyorder=1,
humidity_scaling=None, compute_tau_cirrus_in_model_init='auto', filter_sac=True,
filter_initially_persistent=True, persistent_buffer=None, verbose_outputs=False,
compute_atr20=False, global_rf_to_atr20_factor=0.0151, initial_wake_vortex_depth=0.5,
sedimentation_impact_factor=0.5, default_nvpm_ei_n=10000000000000.0,
wind_shear_enhancement_exponent=0.5, nvpm_ei_n_enhancement_factor=1.0,
min_ice_particle_number_nvpm_ei_n=10000000000000.0, max_depth=1500.0,
unterstrasser_ice_survival_fraction=False, radiative_heating_effects=False,
contrail_contrail_overlapping=False, dz_overlap_m=500.0, radius_threshold_um=<factory>,
habits=<factory>, habit_distributions=<factory>, rf_sw_enhancement_factor=1.0,
rf_lw_enhancement_factor=1.0, min_altitude_m=6000.0, max_altitude_m=13000.0,
max_seg_length_m=40000.0, max_age=numpy.timedelta64(20, 'h'), min_tau=1e-06,
max_tau=10000000000.0, min_n_ice_per_m3=1000.0, max_n_ice_per_m3=1e+20)

```

## Methods

|                                           |                               |
|-------------------------------------------|-------------------------------|
| <code>__init__([copy_source, ...])</code> |                               |
| <code>as_dict()</code>                    | Convert object to dictionary. |

## Attributes

|                                               |                                                                                                                                                                                                              |
|-----------------------------------------------|--------------------------------------------------------------------------------------------------------------------------------------------------------------------------------------------------------------|
| <code>compute_atr20</code>                    | Add additional metric of ATR20 and global yearly mean RF to model output.                                                                                                                                    |
| <code>compute_tau_cirrus_in_model_init</code> | Compute "tau_cirrus" variable in pressure-level met data during model initialization.                                                                                                                        |
| <code>contrail_contrail_overlapping</code>    | Experimental.                                                                                                                                                                                                |
| <code>copy_source</code>                      | Copy input source data on eval                                                                                                                                                                               |
| <code>default_nvpm_ei_n</code>                | Default <code>nvpm_ei_n</code> value if no data provided and emissions calculations fails.                                                                                                                   |
| <code>downselect_met</code>                   | Downselect input <code>MetDataset`</code> to region around source.                                                                                                                                           |
| <code>dt_integration</code>                   | Apply Euler's method with a fixed step size of <code>dt_integration</code> .                                                                                                                                 |
| <code>dz_m</code>                             | Difference in altitude between top and bottom layer for stratification calculations, [ <i>m</i> ].                                                                                                           |
| <code>dz_overlap_m</code>                     | Experimental.                                                                                                                                                                                                |
| <code>effective_vertical_resolution</code>    | Vertical resolution (m) associated to met data.                                                                                                                                                              |
| <code>filter_initially_persistent</code>      | Filter out waypoints if they don't satisfy the initial persistent criteria Passing in a non-default value is unusual, but is included to allow for false negative calibration and model uncertainty studies. |

continues on next page

Table 5 – continued from previous page

|                                                |                                                                                                                                                                                                   |
|------------------------------------------------|---------------------------------------------------------------------------------------------------------------------------------------------------------------------------------------------------|
| <code>filter_sac</code>                        | Filter out waypoints if the don't satisfy the SAC criteria Note that the SAC algorithm will still be run to calculate <code>T_critical_sac</code> for use estimating initial ice particle number. |
| <code>global_rf_to_atr20_factor</code>         | Constant factor used to convert global- and year-mean RF, [ $Wm^{-2}$ ], to ATR20, [ $K$ ], given by [Yin <i>et al.</i> , 2023].                                                                  |
| <code>humidity_scaling</code>                  | Humidity scaling                                                                                                                                                                                  |
| <code>initial_wake_vortex_depth</code>         | Initial wake vortex depth scaling factor.                                                                                                                                                         |
| <code>interpolation_bounds_error</code>        | If True, points lying outside interpolation will raise an error                                                                                                                                   |
| <code>interpolation_fill_value</code>          | Used for outside interpolation value if <code>interpolation_bounds_error</code> is False                                                                                                          |
| <code>interpolation_localize</code>            | Experimental.                                                                                                                                                                                     |
| <code>interpolation_method</code>              | Interpolation method.                                                                                                                                                                             |
| <code>interpolation_q_method</code>            | Experimental.                                                                                                                                                                                     |
| <code>interpolation_use_indices</code>         | Experimental.                                                                                                                                                                                     |
| <code>max_age</code>                           | Max age of contrail evolution.                                                                                                                                                                    |
| <code>max_altitude_m</code>                    | Maximum altitude domain in simulation, [ $m$ ] If set to None, this check is disabled.                                                                                                            |
| <code>max_depth</code>                         | Upper bound for contrail plume depth, constraining it to realistic values.                                                                                                                        |
| <code>max_n_ice_per_m3</code>                  | Maximum contrail ice particle number per volume of air to prevent unrealistic values.                                                                                                             |
| <code>max_seg_length_m</code>                  | Maximum contrail segment length in simulation to prevent unrealistic values, [ $m$ ].                                                                                                             |
| <code>max_tau</code>                           | Maximum contrail optical depth to prevent unrealistic values.                                                                                                                                     |
| <code>met_latitude_buffer</code>               | Met latitude buffer [WGS84] for Cocip evolution.                                                                                                                                                  |
| <code>met_level_buffer</code>                  | Met level buffer [ $hPa$ ] for Cocip initialization and evolution.                                                                                                                                |
| <code>met_longitude_buffer</code>              | Met longitude [WGS84] buffer for Cocip evolution.                                                                                                                                                 |
| <code>met_time_buffer</code>                   | Met time buffer for input to <code>Flight.downselect_met()</code> Only applies when <code>downselect_met</code> is True.                                                                          |
| <code>min_altitude_m</code>                    | Minimum altitude domain in simulation, [ $m$ ] If set to None, this check is disabled.                                                                                                            |
| <code>min_ice_particle_number_nvpm_ei_n</code> | Lower bound for <code>nvpm_ei_n</code> to account for ambient aerosol particles for newer engines, [ $kg^{-1}$ ]                                                                                  |
| <code>min_n_ice_per_m3</code>                  | Minimum contrail ice particle number per volume of air.                                                                                                                                           |
| <code>min_tau</code>                           | Minimum contrail optical depth.                                                                                                                                                                   |
| <code>nvpm_ei_n_enhancement_factor</code>      | Multiply flight black carbon number by enhancement factor.                                                                                                                                        |
| <code>persistent_buffer</code>                 | Continue evolving contrail waypoints <code>persistent_buffer</code> beyond end of contrail life.                                                                                                  |
| <code>process_emissions</code>                 | Determines whether <code>Cocip.process_emissions()</code> runs on model <code>Cocip.eval()</code> Set to False when input Flight includes emissions data.                                         |
| <code>radiative_heating_effects</code>         | Experimental.                                                                                                                                                                                     |

continues on next page

Table 5 – continued from previous page

|                                                  |                                                                                                                  |
|--------------------------------------------------|------------------------------------------------------------------------------------------------------------------|
| <code>rf_lw_enhancement_factor</code>            | Scale longwave radiative forcing.                                                                                |
| <code>rf_sw_enhancement_factor</code>            | Scale shortwave radiative forcing.                                                                               |
| <code>sedimentation_impact_factor</code>         | Sedimentation impact factor.                                                                                     |
| <code>smooth_true_airspeed</code>                | Smoothing parameters for true airspeed.                                                                          |
| <code>smooth_true_airspeed_polyorder</code>      |                                                                                                                  |
| <code>smooth_true_airspeed_window_length</code>  |                                                                                                                  |
| <code>unterstrasser_ice_survival_fraction</code> | Experimental.                                                                                                    |
| <code>verbose_outputs</code>                     | Add additional values to the flight and contrail that are not explicitly necessary for calculation.              |
| <code>verify_met</code>                          | Call <code>_verify_met()</code> on model instantiation.                                                          |
| <code>wind_shear_enhancement_exponent</code>     | Parameter denoted by $n$ in eq.                                                                                  |
| <code>radius_threshold_um</code>                 | Radius threshold for regime bins, [ $\mu m$ ] This is the row index label for <code>habit_distributions</code> . |
| <code>habits</code>                              | Particle habit (shape) types.                                                                                    |
| <code>habit_distributions</code>                 | Mix of ice particle habits in each radius regime.                                                                |

**compute\_atr20 = False**

Add additional metric of ATR20 and global yearly mean RF to model output. These are not standard CoCiP outputs but based on the derivation used in the first supplement to [Yin *et al.*, 2023]. ATR20 is defined as the average temperature response over a 20 year horizon.

**compute\_tau\_cirrus\_in\_model\_init = 'auto'**

Compute "tau\_cirrus" variable in pressure-level met data during model initialization. Must be one of "auto", True, or False. If set to "auto", "tau\_cirrus" will be computed during model initialization iff the met data is dask-backed. Otherwise, it will be computed during model evaluation after the met data is downselected.

**contrail\_contrail\_overlapping = False**

Experimental. Radiative effects due to contrail-contrail overlapping Account for change in local contrail shortwave and longwave radiative forcing due to contrail-contrail overlapping.

New in version 0.45.

**default\_nvpm\_ei\_n = 1000000000000000.0**

Default nvpm\_ei\_n value if no data provided and emissions calculations fails.

**dt\_integration = numpy.timedelta64(30, 'm')**

Apply Euler's method with a fixed step size of dt\_integration. Advected waypoints are interpolated against met data once each dt\_integration.

**dz\_m = 200.0**

Difference in altitude between top and bottom layer for stratification calculations, [ $m$ ]. Used to approximate derivative of "lagrangian\_tendency\_of\_air\_pressure" layer.

**dz\_overlap\_m = 500.0**

Experimental. Contrail-contrail overlapping altitude interval If `contrail_contrail_overlapping` is set to True, contrails will be grouped into altitude intervals, and all contrails within each altitude interval are treated as one contrail layer where they do not overlap.

**effective\_vertical\_resolution = 2000.0**

Vertical resolution (m) associated to met data. Constant below applies to ECMWF data.



**filter\_initially\_persistent = True**

Filter out waypoints if they don't satisfy the initial persistent criteria. Passing in a non-default value is unusual, but is included to allow for false negative calibration and model uncertainty studies.

**filter\_sac = True**

Filter out waypoints if they don't satisfy the SAC criteria. Note that the SAC algorithm will still be run to calculate `T_critical_sac` for use estimating initial ice particle number. Passing in a non-default value is unusual, but is included to allow for false negative calibration and model uncertainty studies.

**global\_rf\_to\_atr20\_factor = 0.0151**

Constant factor used to convert global- and year-mean RF, [ $Wm^{-2}$ ], to ATR20, [ $K$ ], given by [Yin *et al.*, 2023].

**habit\_distributions**

Mix of ice particle habits in each radius regime. Rows indexes are `radius_threshold_um` elements. Columns indexes are `habits` particle habit type. See Table 2 from [Schumann *et al.*, 2011].

**habits**

Particle habit (shape) types. This is the column index label for `habit_distributions`. See Table 2 in [Schumann *et al.*, 2011].

**humidity\_scaling = None**

Humidity scaling

**initial\_wake\_vortex\_depth = 0.5**

Initial wake vortex depth scaling factor. This factor scales max contrail downward displacement after the wake vortex phase to set the initial contrail depth. Denoted  $C_{D0}$  in eq (14) in [Schumann, 2012].

**max\_age = numpy.timedelta64(20, 'h')**

Max age of contrail evolution.

**max\_altitude\_m = 13000.0**

Maximum altitude domain in simulation, [ $m$ ]. If set to `None`, this check is disabled.

**max\_depth = 1500.0**

Upper bound for contrail plume depth, constraining it to realistic values. CoCiP only uses the ambient conditions at the mid-point of the Gaussian plume, and the edges could be in subsaturated conditions and sublimate. Important when `radiative_heating_effects` is enabled.

**max\_n\_ice\_per\_m3 = 1e+20**

Maximum contrail ice particle number per volume of air to prevent unrealistic values.

**max\_seg\_length\_m = 40000.0**

Maximum contrail segment length in simulation to prevent unrealistic values, [ $m$ ].

**max\_tau = 10000000000.0**

Maximum contrail optical depth to prevent unrealistic values.

**met\_latitude\_buffer = (10.0, 10.0)**

Met latitude buffer [WGS84] for Cocip evolution.

**met\_level\_buffer = (40.0, 40.0)**

Met level buffer [ $hPa$ ] for Cocip initialization and evolution.

**met\_longitude\_buffer = (10.0, 10.0)**

Met longitude [WGS84] buffer for Cocip evolution.

**min\_altitude\_m = 6000.0**

Minimum altitude domain in simulation, [*m*] If set to None, this check is disabled.

**min\_ice\_particle\_number\_nvpm\_ei\_n = 10000000000000.0**

Lower bound for `nvpm_ei_n` to account for ambient aerosol particles for newer engines, [ $kg^{-1}$ ]

**min\_n\_ice\_per\_m3 = 1000.0**

Minimum contrail ice particle number per volume of air.

**min\_tau = 1e-06**

Minimum contrail optical depth.

**nvpm\_ei\_n\_enhancement\_factor = 1.0**

Multiply flight black carbon number by enhancement factor. A value of 1.0 provides no scaling. Primarily used to support uncertainty estimation.

**persistent\_buffer = None**

Continue evolving contrail waypoints `persistent_buffer` beyond end of contrail life. Passing in a non-default value is unusual, but is included to allow for false negative calibration and model uncertainty studies.

**process\_emissions = True**

Determines whether `Cocip.process_emissions()` runs on model `Cocip.eval()` Set to False when input Flight includes emissions data.

**radiative\_heating\_effects = False**

Experimental. Radiative heating effects on contrail cirrus properties. Terrestrial and solar radiances warm the contrail ice particles and cause convective turbulence. This effect is expected to enhance vertical mixing and reduce the lifetime of contrail cirrus. This parameter is experimental, and the CoCiP implementation of this parameter may change.

New in version 0.28.9.

**radius\_threshold\_um**

Radius threshold for regime bins, [ $\mu m$ ] This is the row index label for `habit_distributions`. See Table 2 in [Schumann *et al.*, 2011].

**rf\_lw\_enhancement\_factor = 1.0**

Scale longwave radiative forcing. Primarily used to support uncertainty estimation.

**rf\_sw\_enhancement\_factor = 1.0**

Scale shortwave radiative forcing. Primarily used to support uncertainty estimation.

**sedimentation\_impact\_factor = 0.5**

Sedimentation impact factor. Denoted by  $f_T$  in eq. (35) of [Schumann, 2012]. Schumann describes this as “an important adjustable parameter”, and sets it to 0.1 in the original publication. In [Schumann and Graf, 2013], a value of 0.5 is referenced after comparing CoCiP predictions to observations.

**smooth\_true\_airspeed = True**

Smoothing parameters for true airspeed. Only used for Flight models. Passed directly to `scipy.signal.savgol_filter()`. See `pycontrails.Flight.segment_true_airspeed()` for details.

**smooth\_true\_airspeed\_polyorder = 1**

**smooth\_true\_airspeed\_window\_length = 7**

**unterstrasser\_ice\_survival\_fraction = False**

Experimental. Improved ice crystal number survival fraction in the wake vortex phase. Implement [Unterstrasser, 2016], who developed a parametric model that estimates the survival fraction of the contrail ice crystal number after the wake vortex phase based on the results from large eddy simulations. This replicates Fig. 4 of [Kärcher, 2018].

New in version 0.50.1.

**verbose\_outputs = False**

Add additional values to the flight and contrail that are not explicitly necessary for calculation. See also `CocipGridParams.verbose_outputs_formation` and `CocipGridParams.verbose_outputs_evolution`.

**wind\_shear\_enhancement\_exponent = 0.5**

Parameter denoted by  $n$  in eq. (39) of [Schumann, 2012].

**pycontrails.models.cocip.contrail\_properties**

Contrail Property Calculations.

**Functions**

|                                                             |                                                                                                    |
|-------------------------------------------------------------|----------------------------------------------------------------------------------------------------|
| <code>contrail_edges(lon, lat, sin_a, cos_a, width)</code>  | Calculate the longitude and latitude of the contrail edges to account for contrail spreading.      |
| <code>contrail_optical_depth(r_ice_vol, ...)</code>         | Calculate the contrail optical depth for each waypoint.                                            |
| <code>contrail_persistent(latitude, altitude, ...)</code>   | Determine surviving contrail segments after time integration step.                                 |
| <code>contrail_vertices(lon, lat, sin_a, cos_a, ...)</code> | Calculate the longitude and latitude of the contrail vertices.                                     |
| <code>energy_forcing(rf_net_t1, rf_net_t2, ...)</code>      | Calculate the contrail energy forcing over time step.                                              |
| <code>horizontal_diffusivity(ds_dz, depth)</code>           | Calculate contrail horizontal diffusivity.                                                         |
| <code>ice_particle_activation_rate(...)</code>              | Calculate the activation rate of black carbon particles to contrail ice crystals.                  |
| <code>ice_particle_mass(r_ice_vol)</code>                   | Calculate the contrail ice particle mass.                                                          |
| <code>ice_particle_number(nvpm_ei_n, fuel_dist, ...)</code> | Calculate the initial number of ice particles per distance after the wake vortex phase.            |
| <code>ice_particle_number_per_mass_of_air(...)</code>       | Calculate the number of contrail ice particles per mass of air.                                    |
| <code>ice_particle_number_per_volume_of_plume(...)</code>   | Calculate the number of contrail ice particles per volume of plume ( <code>n_ice_per_vol</code> ). |
| <code>ice_particle_survival_fraction(iwc, iwc_1)</code>     | Estimate the fraction of contrail ice particle number that survive the wake vortex phase.          |
| <code>ice_particle_terminal_fall_speed(...)</code>          | Calculate the terminal fall speed of contrail ice particles.                                       |
| <code>ice_particle_volume_mean_radius(iwc, ...)</code>      | Calculate the ice particle volume mean radius.                                                     |
| <code>initial_iwc(air_temperature, ...)</code>              | Estimate the initial contrail ice water content (iwc) before the wake vortex phase.                |
| <code>initial_persistent(iwc_1, rhi_1)</code>               | Determine if waypoints have persistent contrails.                                                  |
| <code>iwc_adiabatic_heating(air_temperature, ...)</code>    | Calculate the change in ice water content due to adiabatic heating from the wake vortex phase.     |
| <code>iwc_post_wake_vortex(iwc, iwc_ad)</code>              | Calculate the ice water content after the wake vortex phase ( <code>iwc_1</code> ).                |

continues on next page

Table 6 – continued from previous page

|                                                                |                                                                                                             |
|----------------------------------------------------------------|-------------------------------------------------------------------------------------------------------------|
| <code>light_wave_phase_delay(r_ice_vol)</code>                 | Calculate the phase delay of the light wave passing through the contrail ice particle.                      |
| <code>mean_energy_flux_per_m(rad_flux_per_m, dt)</code>        | Calculate the mean energy flux per length of contrail on segment following waypoint.                        |
| <code>mean_radiative_flux_per_m(rf_net_t1, ...)</code>         | Calculate the mean radiative flux per length of contrail between two time steps.                            |
| <code>new_contrail_dimensions(sigma_yy_t2, sigma_zz_t2)</code> | Calculate the new contrail width and depth.                                                                 |
| <code>new_effective_area_from_sigma(sigma_yy, ...)</code>      | Calculate effective cross-sectional area of contrail plume ( <code>area_eff</code> ) from sigma parameters. |
| <code>new_ice_particle_number(n_ice_per_m_t1, ...)</code>      | Calculate the number of ice particles per distance at the end of the time step.                             |
| <code>new_ice_water_content(iwc_t1, q_t1, q_t2, ...)</code>    | Calculate the new contrail ice water content after the time integration step ( <code>iwc_t2</code> ).       |
| <code>particle_losses_aggregation(r_ice_vol, ...)</code>       | Calculate the rate of contrail ice particle losses due to sedimentation-induced aggregation.                |
| <code>particle_losses_turbulence(width, depth, ...)</code>     | Calculate the rate of contrail ice particle losses due to plume-internal turbulence.                        |
| <code>plume_effective_cross_sectional_area(width, ...)</code>  | Calculate the effective cross-sectional area of the contrail plume ( <code>area_eff</code> ).               |
| <code>plume_effective_depth(width, area_eff)</code>            | Calculate the effective depth of the contrail plume ( <code>depth_eff</code> ).                             |
| <code>plume_mass_per_distance(area_eff, rho_air)</code>        | Calculate the contrail plume mass per unit length.                                                          |
| <code>plume_temporal_evolution(width_t1, depth_t1, ...)</code> | Calculate the temporal evolution of the contrail plume parameters.                                          |
| <code>q_exhaust(air_temperature, air_pressure, ...)</code>     | Calculate the specific humidity released by water vapor from aircraft emissions.                            |
| <code>scattering_extinction_efficiency(r_ice_vol)</code>       | Calculate the scattering extinction efficiency ( <code>q_ext</code> ) based on Mie-theory.                  |
| <code>segment_length_ratio(seg_length_t1, ...)</code>          | Calculate the ratio of contrail segment length pre-advection to post-advection.                             |
| <code>temperature_adiabatic_heating(...)</code>                | Calculate the ambient air temperature for each waypoint after the wake vortex phase.                        |
| <code>vertical_diffusivity(air_pressure, ...)</code>           | Calculate contrail vertical diffusivity.                                                                    |

`pycontrails.models.cocip.contrail_properties.contrail_edges(lon, lat, sin_a, cos_a, width)`

Calculate the longitude and latitude of the contrail edges to account for contrail spreading.

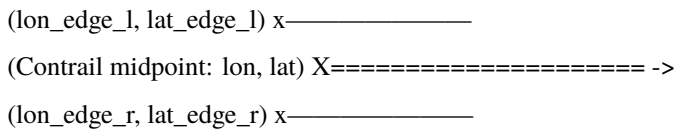

**Parameters**

- `lon` (`npt.NDArray[np.float64]`) – longitude of contrail waypoint, degrees
- `lat` (`npt.NDArray[np.float64]`) – latitude of contrail waypoint, degrees
- `sin_a` (`npt.NDArray[np.float64]`) –  $\sin(a)$ , where  $a$  is the angle between the plume and the longitudinal axis
- `cos_a` (`npt.NDArray[np.float64]`) –  $\cos(a)$ , where  $a$  is the angle between the plume and the longitudinal axis
- `width` (`npt.NDArray[np.float64]`) – contrail width at each waypoint, [ $m$ ]

**Returns**

tuple[npt.NDArray[np.float64], npt.NDArray[np.float64], npt.NDArray[np.float64], npt.NDArray[np.float64]] – (lon\_edge\_l, lat\_edge\_l, lon\_edge\_r, lat\_edge\_r), longitudes and latitudes at the left and right edges of the contrail, degrees

pycontrails.models.cocip.contrail\_properties.**contrail\_optical\_depth**(*r\_ice\_vol, n\_ice\_per\_m, width*)

Calculate the contrail optical depth for each waypoint.

**Parameters**

- **r\_ice\_vol** (npt.NDArray[np.float64]) – ice particle volume mean radius, [*m*]
- **n\_ice\_per\_m** (npt.NDArray[np.float64]) – Number of contrail ice particles per distance, [*m*<sup>-1</sup>]
- **width** (npt.NDArray[np.float64]) – Contrail width, [*m*]

**Returns**

npt.NDArray[np.float64] – Contrail optical depth

pycontrails.models.cocip.contrail\_properties.**contrail\_persistent**(*latitude, altitude, segment\_length, age, tau\_contrail, n\_ice\_per\_m3, params*)

Determine surviving contrail segments after time integration step.

A contrail waypoint reaches its end of life if any of the following conditions hold:

1. Contrail age exceeds `max_age`
2. Contrail optical depth lies outside of interval [`min_tau`, `max_tau`]
3. Ice number density lies outside of interval [`min_n_ice_per_m3`, `max_n_ice_per_m3`]
4. Altitude lies outside of the interval [`min_altitude_m`, `max_altitude_m`]
5. Segment length exceeds `max_seg_length_m`
6. Latitude values are within 1 degree of the north or south pole

This function warns if all values in the `tau_contrail` array are nan.

Changed in version 0.25.10: Extreme values of `latitude` (ie, close to the north or south pole) now create an end of life condition. This check helps address issues related to divergence in the polar regions. (With large enough integration time delta, it is still possible for post-advection latitude values to lie outside of [-90, 90], but this is no longer possible with typical parameters and wind speeds.)

**Parameters**

- **latitude** (npt.NDArray[np.float64]) – Contrail latitude, [deg]
- **altitude** (npt.NDArray[np.float64]) – Contrail altitude, [*m*]
- **segment\_length** (npt.NDArray[np.float64]) – Contrail segment length, [*m*]
- **age** (npt.NDArray[np.timedelta64]) – Contrail age
- **tau\_contrail** (npt.NDArray[np.float64]) – Contrail optical depth
- **n\_ice\_per\_m3** (npt.NDArray[np.float64]) – Contrail ice particle number per volume of air, [*m*<sup>-3</sup>]
- **params** (dict[str, Any]) – Dictionary of CocipParams parameters determining the conditions for end of contrail life.

**Returns**

`npt.NDArray[np.bool_]` – Boolean array indicating surviving contrails. Persisting contrails will be marked as True.

`pycontrails.models.cocip.contrail_properties.contrail_vertices(lon, lat, sin_a, cos_a, width, segment_length)`

Calculate the longitude and latitude of the contrail vertices.

This is equivalent to running `contrail_edges()` at each contrail waypoint and associating the next continuous waypoint with the previous. This method is helpful when you want to treat each contrail waypoint independently.

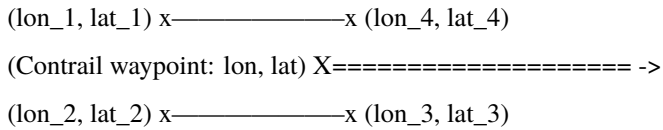

**Parameters**

- **lon** (`npt.NDArray[np.float64]`) – longitude of contrail waypoint, degrees
- **lat** (`npt.NDArray[np.float64]`) – latitude of contrail waypoint, degrees
- **sin\_a** (`npt.NDArray[np.float64]`) –  $\sin(a)$ , where  $a$  is the angle between the plume and the longitudinal axis
- **cos\_a** (`npt.NDArray[np.float64]`) –  $\cos(a)$ , where  $a$  is the angle between the plume and the longitudinal axis
- **width** (`npt.NDArray[np.float64]`) – contrail width at each waypoint,  $[m]$
- **segment\_length** (`npt.NDArray[np.float64]`) – contrail length at each waypoint,  $[m]$

**Returns**

`tuple[npt.NDArray[np.float64], npt.NDArray[np.float64], npt.NDArray[np.float64], npt.NDArray[np.float64]]` – (lon\_1, lat\_1, lon\_2, lat\_2, lon\_3, lat\_3, lon\_4, lat\_4) degrees

`pycontrails.models.cocip.contrail_properties.energy_forcing(rf_net_t1, rf_net_t2, width_t1, width_t2, seg_length_t2, dt)`

Calculate the contrail energy forcing over time step.

The contrail energy forcing is calculated as the local contrail net radiative forcing (RF', change in energy flux per contrail area) multiplied by its width and integrated over its length and lifetime.

**Parameters**

- **rf\_net\_t1** (`npt.NDArray[np.float64]`) – local contrail net radiative forcing at the start of the time step,  $[Wm^{-2}]$
- **rf\_net\_t2** (`npt.NDArray[np.float64]`) – local contrail net radiative forcing at the end of the time step,  $[Wm^{-2}]$
- **width\_t1** (`npt.NDArray[np.float64]`) – contrail width at the start of the time step,  $[m]$
- **width\_t2** (`npt.NDArray[np.float64]`) – contrail width at the end of the time step,  $[m]$
- **seg\_length\_t2** (`npt.NDArray[np.float64] | float`) – Segment length of contrail waypoint at the end of the time step,  $[m]$
- **dt** (`npt.NDArray[np.timedelta64] | np.timedelta64`) – integrate contrails with time steps of  $dt$ ,  $[s]$

**Returns**

`npt.NDArray[np.float64]` – Contrail energy forcing over time step  $dt$ ,  $[J]$ .

`pycontrails.models.cocip.contrail_properties.horizontal_diffusivity(ds_dz, depth)`

Calculate contrail horizontal diffusivity.

#### Parameters

- **ds\_dz** (`npt.NDArray[np.float64]`) – Total wind shear (eastward and northward winds) with respect to altitude ( $dz$ ), [ $m s^{-1}/Pa$ ]
- **depth** (`npt.NDArray[np.float64]`) – Contrail depth at each waypoint, [ $m$ ]

#### Returns

`npt.NDArray[np.float64]` – horizontal diffusivity, [ $m^2 s^{-1}$ ]

#### References

- [Schumann, 2012]

#### Notes

Accounts for the turbulence-induced diffusive contrail spreading in the horizontal direction.

`pycontrails.models.cocip.contrail_properties.ice_particle_activation_rate(air_temperature, T_crit_sac)`

Calculate the activation rate of black carbon particles to contrail ice crystals.

The activation rate is calculated as a function of the difference between the ambient temperature and the Schmidt-Appleman threshold temperature `T_crit_sac`.

#### Parameters

- **air\_temperature** (`npt.NDArray[np.float64]`) – ambient temperature at each waypoint before `wake_wortex`, [ $K$ ]
- **T\_crit\_sac** (`npt.NDArray[np.float64]`) – estimated Schmidt-Appleman temperature threshold for contrail formation, [ $K$ ]

#### Returns

`npt.NDArray[np.float64]` – Proportion of black carbon particles that activates to contrail ice parties.

#### Notes

The equation is not published but based on the raw data from [Bräuer *et al.*, 2021].

#### References

- [Bräuer *et al.*, 2021]

`pycontrails.models.cocip.contrail_properties.ice_particle_mass(r_ice_vol)`

Calculate the contrail ice particle mass.

It is calculated by multiplying the mean ice particle volume with the density of ice

#### Parameters

**r\_ice\_vol** (`npt.NDArray[np.float64]`) – Ice particle volume mean radius, [ $m$ ]

**Returns**

`npt.NDArray[np.float64]` – Mean contrail ice particle mass, [ $kg$ ]

`pycontrails.models.cocip.contrail_properties.ice_particle_number`(*nvp*<sub>pm\_ei\_n</sub>, *fuel\_dist*, *f\_surv*, *air\_temperature*, *T\_crit\_sac*, *min\_ice\_particle\_number\_nvp*<sub>pm\_ei\_n</sub>)

Calculate the initial number of ice particles per distance after the wake vortex phase.

The initial number of ice particle per distance is calculated from the black carbon number emissions index *nvp*<sub>pm\_ei\_n</sub> and fuel burn per distance *fuel\_dist*. Note that a lower bound for *nvp*<sub>pm\_ei\_n</sub> is set at  $1e13$   $kg^{-1}$  to account for the activation of ambient aerosol particles and organic volatile particles.

**Parameters**

- **nvp**<sub>pm\_ei\_n</sub> (`npt.NDArray[np.float64]`) – black carbon number emissions index, [ $kg^{-1}$ ]
- **fuel\_dist** (`npt.NDArray[np.float64]`) – fuel consumption of the flight segment per distance traveled, [ $kgm^{-1}$ ]
- **f\_surv** (`npt.NDArray[np.float64]`) – Fraction of contrail ice particle number that survive the wake vortex phase.
- **air\_temperature** (`npt.NDArray[np.float64]`) – ambient temperature for each waypoint, [ $K$ ]
- **T\_crit\_sac** (`npt.NDArray[np.float64]`) – estimated Schmidt-Appleman temperature threshold for contrail formation, [ $K$ ]
- **min\_ice\_particle\_number\_nvp**<sub>pm\_ei\_n</sub> (`float`) – lower bound for *nvp*<sub>pm\_ei\_n</sub> to account for ambient aerosol particles for newer engines [ $kg^{-1}$ ]

**Returns**

`npt.NDArray[np.float64]` – initial number of ice particles per distance after the wake vortex phase, [ $m^{-1}$ ]

`pycontrails.models.cocip.contrail_properties.ice_particle_number_per_mass_of_air`(*n\_ice\_per\_vol*, *rho\_air*)

Calculate the number of contrail ice particles per mass of air.

**Parameters**

- **n\_ice\_per\_vol** (`npt.NDArray[np.float64]`) – number of ice particles per volume of contrail plume at time *t*, [ $m^{-3}$ ]
- **rho\_air** (`npt.NDArray[np.float64]`) – density of air for each waypoint, [ $kgm^{-3}$ ]

**Returns**

`npt.NDArray[np.float64]` – number of ice particles per mass of air at time *t*, [ $kg^{-1}$ ]

`pycontrails.models.cocip.contrail_properties.ice_particle_number_per_volume_of_plume`(*n\_ice\_per\_m*, *area\_eff*)

Calculate the number of contrail ice particles per volume of plume (*n\_ice\_per\_vol*).

**Parameters**

- **n\_ice\_per\_m** (`npt.NDArray[np.float64]`) – number of ice particles per distance at time *t*, [ $m^{-1}$ ]
- **area\_eff** (`npt.NDArray[np.float64]`) – effective cross-sectional area of the contrail plume, [ $m^2$ ]



**Returns**

`npt.NDArray[np.float64]` – number of ice particles per volume of contrail plume at time  $t$ , [ $m^{-3}$ ]

`pycontrails.models.cocip.contrail_properties.ice_particle_survival_fraction(iwc, iwc_1)`

Estimate the fraction of contrail ice particle number that survive the wake vortex phase.

CoCiP assumes that this fraction is proportional to the change in ice water content ( $iwc_1 - iwc$ ) before and after the wake vortex phase.

**Parameters**

- **`iwc`** (`npt.NDArray[np.float64]`) – initial ice water content at each waypoint before the wake vortex phase, [ $kg_{H_2O}/kg_{air}$ ]
- **`iwc_1`** (`npt.NDArray[np.float64]`) – ice water content after the wake vortex phase, [ $kg_{H_2O}/kg_{air}$ ]

**Returns**

`npt.NDArray[np.float64]` – Fraction of contrail ice particle number that survive the wake vortex phase.

`pycontrails.models.cocip.contrail_properties.ice_particle_terminal_fall_speed(air_pressure, air_temperature, r_ice_vol)`

Calculate the terminal fall speed of contrail ice particles.

$v_t$  is calculated based on a parametric model from [Spichtinger and Gierens, 2009], using inputs of pressure level, ambient temperature and the ice particle volume mean radius. See Table 2 for the model parameters.

**Parameters**

- **`air_pressure`** (`npt.NDArray[np.float64]`) – Pressure altitude at each waypoint, [ $Pa$ ]
- **`air_temperature`** (`npt.NDArray[np.float64]`) – Ambient temperature for each waypoint, [ $K$ ]
- **`r_ice_vol`** (`npt.NDArray[np.float64]`) – Ice particle volume mean radius, [ $m$ ]

**Returns**

`npt.NDArray[np.float64]` – Terminal fall speed of contrail ice particles, [ $ms^{-1}$ ]

**References**

- [Spichtinger and Gierens, 2009]

`pycontrails.models.cocip.contrail_properties.ice_particle_volume_mean_radius(iwc, n_ice_per_kg_air)`

Calculate the ice particle volume mean radius.

**Parameters**

- **`iwc`** (`npt.NDArray[np.float64]`) – contrail ice water content, i.e., contrail ice mass per kg of air, [ $kg_{H_2O}/kg_{air}$ ]
- **`n_ice_per_kg_air`** (`npt.NDArray[np.float64]`) – number of ice particles per mass of air, [ $kg^{-1}$ ]

**Returns**

`npt.NDArray[np.float64]` – ice particle volume mean radius, [ $m$ ]

## Notes

`r_ice_vol` is the mean radius of a sphere that has the same volume as the contrail ice particle.

`r_ice_vol` calculated by dividing the total volume of contrail ice particle per kg of air (`total_ice_volume, m * *3/kg - air`) with the number of contrail ice particles per kg of air (`n_ice_per_kg_air, /kg - air`).

`pycontrails.models.cocip.contrail_properties.initial_iwc`(*air\_temperature, specific\_humidity, air\_pressure, fuel\_dist, width, depth, ei\_h2o*)

Estimate the initial contrail ice water content (iwc) before the wake vortex phase.

Note that the ice water content is replaced by zero if it is negative (dry air), and this will end the contrail life-cycle in subsequent steps.

### Parameters

- **air\_temperature** (`npt.NDArray[np.float64]`) – ambient temperature for each waypoint, [K]
- **specific\_humidity** (`npt.NDArray[np.float64]`) – ambient specific humidity for each waypoint, [ $kg_{H_2O}/kg_{air}$ ]
- **air\_pressure** (`npt.NDArray[np.float64]`) – initial pressure altitude at each waypoint, before the wake vortex phase, [Pa]
- **fuel\_dist** (`npt.NDArray[np.float64]`) – fuel consumption of the flight segment per distance traveled, [ $kgm^{-1}$ ]
- **width** (`npt.NDArray[np.float64]`) – initial contrail width, [m]
- **depth** (`npt.NDArray[np.float64]`) – initial contrail depth, [m]
- **ei\_h2o** (`float`) – water vapor emissions index of fuel, [ $kg_{H_2O} kg_{fuel}^{-1}$ ]

### Returns

`npt.NDArray[np.float64]` – Initial contrail ice water content (iwc) at the original waypoint before the wake vortex phase, [ $kg_{H_2O}/kg_{air}$ ]. Returns zero if iwc is is negative (dry air).

`pycontrails.models.cocip.contrail_properties.initial_persistent`(*iwc\_1, rhi\_1*)

Determine if waypoints have persistent contrails.

Conditions for persistent initial\_contrails:

1. ice water content at level 1:  $1e-12 < iwc < 1e10$
2. rhi at level 1:  $0 < rhi < 1e10$

Changed in version 0.25.1: Returned array now has floating dtype. This is consistent with other filtering steps in the CoCiP model (ie, sac).

### Parameters

- **iwc\_1** (`npt.NDArray[np.float64]`) – ice water content after the wake vortex phase, [ $kg_{H_2O}/kg_{air}$ ]
- **rhi\_1** (`npt.NDArray[np.float64]`) – relative humidity with respect to ice after the wake vortex phase

### Returns

`npt.NDArray[np.float64]` – Mask of waypoints with persistent contrails. Waypoints with persistent contrails will have value 1.

## Notes

The RH<sub>i</sub> at level 1 does not need to be above 100% if the *iwc* > 0 kg/kg. If *iwc* > 0 and RH<sub>i</sub> < 100%, the contrail lifetime will not end immediately as the ice particles will gradually evaporate with the rate depending on the background RH<sub>i</sub>.

`pycontrails.models.cocip.contrail_properties.iwc_adiabatic_heating`(*air\_temperature*,  
*air\_pressure*,  
*air\_pressure\_1*)

Calculate the change in ice water content due to adiabatic heating from the wake vortex phase.

### Parameters

- **air\_temperature** (`npt.NDArray[np.float64]`) – ambient temperature for each waypoint, [K]
- **air\_pressure** (`npt.NDArray[np.float64]`) – initial pressure altitude at each waypoint, before the wake vortex phase, [Pa]
- **air\_pressure\_1** (`npt.NDArray[np.float64]`) – pressure altitude at each waypoint, after the wake vortex phase, [Pa]

### Returns

`npt.NDArray[np.float64]` – Change in ice water content due to adiabatic heating from the wake vortex phase, [ $kg_{H_2O}/kg_{air}$ ]

`pycontrails.models.cocip.contrail_properties.iwc_post_wake_vortex`(*iwc*, *iwc\_ad*)

Calculate the ice water content after the wake vortex phase (*iwc\_1*).

*iwc\_1* is calculated by subtracting the initial *iwc* before the wake vortex phase (*iwc*) by the change in *iwc* from adiabatic heating experienced during the wake vortex phase.

Note that the *iwc* is replaced by zero if it is negative (dry air), and this will end the contrail lifecycle in subsequent steps.

### Parameters

- **iwc** (`npt.NDArray[np.float64]`) – initial ice water content at each waypoint before the wake vortex phase, [ $kg_{H_2O}/kg_{air}$ ]
- **iwc\_ad** (`npt.NDArray[np.float64]`) – change in *iwc* from adiabatic heating during the wake vortex phase, [ $kg_{H_2O}/kg_{air}$ ]

### Returns

`npt.NDArray[np.float64]` – ice water content after the wake vortex phase, *iwc\_1*, [ $kg_{H_2O}/kg_{air}$ ]

## Notes

Level 1, see Figure 1 of [Schumann, 2012]

## References

- [Schumann, 2012]

`pycontrails.models.cocip.contrail_properties.light_wave_phase_delay(r_ice_vol)`

Calculate the phase delay of the light wave passing through the contrail ice particle.

### Parameters

`r_ice_vol` (`npt.NDArray[np.float64]`) – ice particle volume mean radius, [*m*]

### Returns

`npt.NDArray[np.float64]` – phase delay of the light wave passing through the contrail ice particle

## References

- [https://en.wikipedia.org/wiki/Mie\\_scattering](https://en.wikipedia.org/wiki/Mie_scattering)

`pycontrails.models.cocip.contrail_properties.mean_energy_flux_per_m(rad_flux_per_m, dt)`

Calculate the mean energy flux per length of contrail on segment following waypoint.

### Parameters

- `rad_flux_per_m` (`npt.NDArray[np.float64]`) – Mean radiative flux between time steps for waypoint, [ $Wm^{-1}$ ]. See `mean_radiative_flux_per_m()`.
- `dt` (`npt.NDArray[np.timedelta64]`) – timedelta of integration timestep for each waypoint.

### Returns

`npt.NDArray[np.float64]` – Mean energy flux per length of contrail after waypoint, [ $Jm^{-1}$ ]

## Notes

Implementation differs from original fortran in two ways:

- Discontinuity is no longer set to 0 (this occurs directly in model Cocip)
- Instead of taking an average of the previous and following segments, energy flux is only calculated for the following segment.

### See also:

`mean_radiative_flux_per_m()`

`pycontrails.models.cocip.contrail_properties.mean_radiative_flux_per_m(rf_net_t1, rf_net_t2, width_t1, width_t2)`

Calculate the mean radiative flux per length of contrail between two time steps.

### Parameters

- `rf_net_t1` (`npt.NDArray[np.float64]`) – local contrail net radiative forcing at the start of the time step, [ $Wm^{-2}$ ]
- `rf_net_t2` (`npt.NDArray[np.float64]`) – local contrail net radiative forcing at the end of the time step, [ $Wm^{-2}$ ]
- `width_t1` (`npt.NDArray[np.float64]`) – contrail width at the start of the time step, [*m*]
- `width_t2` (`npt.NDArray[np.float64]`) – contrail width at the end of the time step, [*m*]

**Returns**

`npt.NDArray[np.float64]` – Mean radiative flux between time steps, [ $Wm^{-1}$ ]

`pycontrails.models.cocip.contrail_properties.new_contrail_dimensions`(*sigma\_yy\_t2*,  
*sigma\_zz\_t2*)

Calculate the new contrail width and depth.

**Parameters**

- **sigma\_yy\_t2** (`npt.NDArray[np.float64]`) – element yy, covariance matrix of the Gaussian concentration field, Eq. (6) of Schumann (2012)
- **sigma\_zz\_t2** (`npt.NDArray[np.float64]`) – element zz, covariance matrix of the Gaussian concentration field, Eq. (6) of Schumann (2012)

**Returns**

- **width\_t2** (`npt.NDArray[np.float64]`) – Contrail width at the end of the time step, [*m*]
- **depth\_t2** (`npt.NDArray[np.float64]`) – Contrail depth at the end of the time step, [*m*]

`pycontrails.models.cocip.contrail_properties.new_effective_area_from_sigma`(*sigma\_yy*,  
*sigma\_zz*,  
*sigma\_yz*)

Calculate effective cross-sectional area of contrail plume (*area\_eff*) from sigma parameters.

This method calculates the same output as `:func`plume_effective_cross_sectional_area``, but calculated with different input parameters.

**Parameters**

- **sigma\_yy** (`npt.NDArray[np.float64]`) – element yy, covariance matrix of the Gaussian concentration field, Eq. (6) of Schumann (2012)
- **sigma\_zz** (`npt.NDArray[np.float64]`) – element zz, covariance matrix of the Gaussian concentration field, Eq. (6) of Schumann (2012)
- **sigma\_yz** (`npt.NDArray[np.float64] | float`) – element yz, covariance matrix of the Gaussian concentration field, Eq. (6) of Schumann (2012)

**Returns**

`npt.NDArray[np.float64]` – Effective cross-sectional area of the contrail plume (*area\_eff*)

`pycontrails.models.cocip.contrail_properties.new_ice_particle_number`(*n\_ice\_per\_m\_t1*,  
*dn\_dt\_agg*, *dn\_dt\_turb*,  
*seg\_ratio*, *dt*)

Calculate the number of ice particles per distance at the end of the time step.

**Parameters**

- **n\_ice\_per\_m\_t1** (`npt.NDArray[np.float64]`) – number of contrail ice particles per distance at the start of the time step, [ $m^{-1}$ ]
- **dn\_dt\_agg** (`npt.NDArray[np.float64]`) – rate of ice particle losses due to sedimentation-induced aggregation, [ $s^{-1}$ ]
- **dn\_dt\_turb** (`npt.NDArray[np.float64]`) – rate of contrail ice particle losses due to plume-internal turbulence, [ $s^{-1}$ ]
- **seg\_ratio** (`npt.NDArray[np.float64] | float`) – Segment length ratio before and after it is advected to the new location.
- **dt** (`npt.NDArray[np.timedelta64] | np.timedelta64`) – integrate contrails with time steps of *dt*, [*s*]

**Returns**

`npt.NDArray[np.float64]` – number of ice particles per distance at the end of the time step, [ $m^{-1}$ ]

`pycontrails.models.cocip.contrail_properties.new_ice_water_content(iwc_t1, q_t1, q_t2, q_sat_t1, q_sat_t2, mass_plume_t1, mass_plume_t2)`

Calculate the new contrail ice water content after the time integration step (*iwc\_t2*).

**Parameters**

- ***iwc\_t1*** (`npt.NDArray[np.float64]`) – contrail ice water content, i.e., contrail ice mass per kg of air, at the start of the time step, [ $kg_{H_2O}/kg_{air}$ ]
- ***q\_t1*** (`npt.NDArray[np.float64]`) – specific humidity for each waypoint at the start of the time step, [ $kg_{H_2O}/kg_{air}$ ]
- ***q\_t2*** (`npt.NDArray[np.float64]`) – specific humidity for each waypoint at the end of the time step, [ $kg_{H_2O}/kg_{air}$ ]
- ***q\_sat\_t1*** (`npt.NDArray[np.float64]`) – saturation humidity for each waypoint at the start of the time step, [ $kg_{H_2O}/kg_{air}$ ]
- ***q\_sat\_t2*** (`npt.NDArray[np.float64]`) – saturation humidity for each waypoint at the end of the time step, [ $kg_{H_2O}/kg_{air}$ ]
- ***mass\_plume\_t1*** (`npt.NDArray[np.float64]`) – contrail plume mass per unit length at the start of the time step, [ $kg_{air}m^{-1}$ ]
- ***mass\_plume\_t2*** (`npt.NDArray[np.float64]`) – contrail plume mass per unit length at the end of the time step, [ $kg_{air}m^{-1}$ ]

**Returns**

`npt.NDArray[np.float64]` – Contrail ice water content at the end of the time step, [ $kg_{ice}kg_{air}^{-1}$ ]

**Notes**

- (1) The ice water content is fully conservative.
- (2) *mass\_h2o\_t2*: the total H2O mass (ice + vapour) per unit of contrail plume [Units of kg-H2O/m]
- (3) *q\_sat* is used to calculate *mass\_h2o* because air inside the contrail is assumed to be ice saturated.
- (4)  $(mass\_plume\_t2 - mass\_plume) * q\_mean$ : contrail absorbs (releases) H2O from (to) surrounding air.
- (5)  $iwc\_t2 = mass\_h2o\_t2 / mass\_plume\_t2 - q\_sat\_t2$ : H2O in the gas phase is removed ( $-q\_sat\_t2$ ).

`pycontrails.models.cocip.contrail_properties.particle_losses_aggregation(r_ice_vol, terminal_fall_speed, area_eff, agg_efficiency=1.0)`

Calculate the rate of contrail ice particle losses due to sedimentation-induced aggregation.

**Parameters**

- ***r\_ice\_vol*** (`npt.NDArray[np.float64]`) – Ice particle volume mean radius, [*m*]

- **terminal\_fall\_speed** (`npt.NDArray[np.float64]`) – Terminal fall speed of contrail ice particles, [ $m s^{-1}$ ]
- **area\_eff** (`npt.NDArray[np.float64]`) – Effective cross-sectional area of the contrail plume, [ $m^2$ ]
- **agg\_efficiency** (`float, optional`) – Aggregation efficiency

**Returns**

`npt.NDArray[np.float64]` – Rate of contrail ice particle losses due to sedimentation-induced aggregation, [ $s^{-1}$ ]

**Notes**

The aggregation efficiency (`agg_efficiency = 1`) was calibrated based on the observed lifetime and optical properties from the Contrail Library (COLI) database ([Schumann *et al.*, 2017]).

**References**

- [Schumann *et al.*, 2017]

`pycontrails.models.cocip.contrail_properties.particle_losses_turbulence`(*width, depth, depth\_eff, diffuse\_h, diffuse\_v, turb\_efficiency=0.1*)

Calculate the rate of contrail ice particle losses due to plume-internal turbulence.

**Parameters**

- **width** (`npt.NDArray[np.float64]`) – Contrail width at each waypoint, [ $m$ ]
- **depth** (`npt.NDArray[np.float64]`) – Contrail depth at each waypoint, [ $m$ ]
- **depth\_eff** (`npt.NDArray[np.float64]`) – Effective depth of the contrail plume, [ $m$ ]
- **diffuse\_h** (`npt.NDArray[np.float64]`) – Horizontal diffusivity, [ $m^2 s^{-1}$ ]
- **diffuse\_v** (`npt.NDArray[np.float64]`) – Vertical diffusivity, [ $m^2 s^{-1}$ ]
- **turb\_efficiency** (`float, optional`) – Turbulence sublimation efficiency

**Returns**

`npt.NDArray[np.float64]` – Rate of contrail ice particle losses due to plume-internal turbulence, [ $s^{-1}$ ]

**Notes**

The turbulence sublimation efficiency (`turb_efficiency = 0.1`) was calibrated based on the observed lifetime and optical properties from the Contrail Library (COLI) database ([Schumann *et al.*, 2017]).

## References

- [Schumann *et al.*, 2017]

`pycontrails.models.cocip.contrail_properties.plume_effective_cross_sectional_area`(*width*,  
*depth*,  
*sigma\_yz*)

Calculate the effective cross-sectional area of the contrail plume (*area\_eff*).

*sigma\_yy*, *sigma\_zz* and *sigma\_yz* are the parameters governing the contrail plume's temporal evolution.

### Parameters

- **width** (`npt.NDArray[np.float64]`) – contrail width at each waypoint, [*m*]
- **depth** (`npt.NDArray[np.float64]`) – contrail depth at each waypoint, [*m*]
- **sigma\_yz** (`npt.NDArray[np.float64] | float`) – temporal evolution of the contrail plume parameters

### Returns

`npt.NDArray[np.float64]` – effective cross-sectional area of the contrail plume, [*m*<sup>2</sup>]

`pycontrails.models.cocip.contrail_properties.plume_effective_depth`(*width*, *area\_eff*)

Calculate the effective depth of the contrail plume (*depth\_eff*).

*depth\_eff* is calculated from the effective cross-sectional area (*area\_eff*) and the contrail width.

### Parameters

- **width** (`npt.NDArray[np.float64]`) – contrail width at each waypoint, [*m*]
- **area\_eff** (`npt.NDArray[np.float64]`) – effective cross-sectional area of the contrail plume, [*m*<sup>2</sup>]

### Returns

`npt.NDArray[np.float64]` – effective depth of the contrail plume, [*m*]

`pycontrails.models.cocip.contrail_properties.plume_mass_per_distance`(*area\_eff*, *rho\_air*)

Calculate the contrail plume mass per unit length.

### Parameters

- **area\_eff** (`npt.NDArray[np.float64]`) – effective cross-sectional area of the contrail plume, [*m*<sup>2</sup>]
- **rho\_air** (`npt.NDArray[np.float64]`) – density of air for each waypoint, [*kgm*<sup>-3</sup>]

### Returns

`npt.NDArray[np.float64]` – contrail plume mass per unit length, [*kgm*<sup>-1</sup>]

`pycontrails.models.cocip.contrail_properties.plume_temporal_evolution`(*width\_t1*, *depth\_t1*,  
*sigma\_yz\_t1*, *dsn\_dz\_t1*,  
*diffuse\_h\_t1*,  
*diffuse\_v\_t1*, *seg\_ratio*,  
*dt*, *max\_depth*)

Calculate the temporal evolution of the contrail plume parameters.

Refer to equation (6) of Schumann (2012). See also equations (29), (30), and (31).

### Parameters

- **width\_t1** (`npt.NDArray[np.float64]`) – contrail width at the start of the time step, [*m*]



- **depth\_t1** (`npt.NDArray[np.float64]`) – contrail depth at the start of the time step, [*m*]
- **sigma\_yz\_t1** (`npt.NDArray[np.float64]`) – `sigma_yz` governs the contrail plume’s temporal evolution at the start of the time step
- **dsn\_dz\_t1** (`npt.NDArray[np.float64]`) – vertical gradient of the horizontal velocity (wind shear) normal to the contrail axis at the start of the time step, [ $m s^{-1} / Pa$ ]:

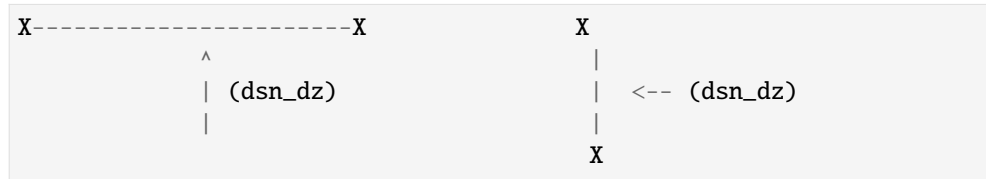

- **diffuse\_h\_t1** (`npt.NDArray[np.float64]`) – horizontal diffusivity at the start of the time step, [ $m^2 s^{-1}$ ]
- **diffuse\_v\_t1** (`npt.NDArray[np.float64]`) – vertical diffusivity at the start of the time step, [ $m^2 s^{-1}$ ]
- **seg\_ratio** (`npt.NDArray[np.float64] | float`) – Segment length ratio before and after it is advected to the new location. See `segment_length_ratio()`.
- **dt** (`npt.NDArray[np.timedelta64] | np.timedelta64`) – integrate contrails with time steps of `dt`, [*s*]
- **max\_depth** (`float | None`) – Constrain maximum plume depth to prevent unrealistic values, [*m*]. If `None` is passed, the maximum plume depth is not constrained.

**Returns**

- **sigma\_yy\_t2** (`npt.NDArray[np.float64]`) – The `yy` component of covariance matrix, [ $m^2$ ]
- **sigma\_zz\_t2** (`npt.NDArray[np.float64]`) – The `zz` component of covariance matrix, [ $m^2$ ]
- **sigma\_yz\_t2** (`npt.NDArray[np.float64]`) – The `yz` component of covariance matrix, [ $m^2$ ]

`pycontrails.models.cocip.contrail_properties.q_exhaust(air_temperature, air_pressure, fuel_dist, width, depth, ei_h2o)`

Calculate the specific humidity released by water vapor from aircraft emissions.

**Parameters**

- **air\_temperature** (`npt.NDArray[np.float64]`) – ambient temperature for each waypoint, [*K*]
- **air\_pressure** (`npt.NDArray[np.float64]`) – initial pressure altitude at each waypoint, before the wake vortex phase, [*Pa*]
- **fuel\_dist** (`npt.NDArray[np.float64]`) – fuel consumption of the flight segment per distance travelled, [ $kg m^{-1}$ ]
- **width** (`npt.NDArray[np.float64]`) – initial contrail width, [*m*]
- **depth** (`npt.NDArray[np.float64]`) – initial contrail depth, [*m*]
- **ei\_h2o** (`float`) – water vapor emissions index of fuel, [ $kg_{H_2O} kg_{fuel}^{-1}$ ]

**Returns**

`npt.NDArray[np.float64]` – Humidity released by water vapour from aircraft emissions, [ $kg_{H_2O}/kg_{air}$ ]

`pycontrails.models.cocip.contrail_properties.scattering_extinction_efficiency(r_ice_vol)`

Calculate the scattering extinction efficiency (`q_ext`) based on Mie-theory.

**Parameters**

`r_ice_vol` (`npt.NDArray[np.float64]`) – ice particle volume mean radius, [ $m$ ]

**Returns**

`npt.NDArray[np.float64]` – scattering extinction efficiency

**References**

- [https://en.wikipedia.org/wiki/Mie\\_scattering](https://en.wikipedia.org/wiki/Mie_scattering)

`pycontrails.models.cocip.contrail_properties.segment_length_ratio(seg_length_t1, seg_length_t2)`

Calculate the ratio of contrail segment length pre-advection to post-advection.

**Parameters**

- `seg_length_t1` (`npt.NDArray[np.float64]`) – Segment length of contrail waypoint at the start of the time step, [ $m$ ]
- `seg_length_t2` (`npt.NDArray[np.float64]`) – Segment length of contrail waypoint after time step and advection, [ $m$ ]

**Returns**

`npt.NDArray[np.float64]` – Ratio of segment length before advection to segment length after advection.

**Notes**

This implementation differs from the original fortran implementation. Instead of taking a geometric mean between the previous and following segments, a simple ratio is computed.

For terminal waypoints along a flight trajectory, the associated segment length is 0. In this case, the segment ratio is set to 1 (the naive ratio 0 / 0 is undefined). According to CoCiP conventions, terminus waypoints are “discontinuous” within the flight trajectory, and will not contribute to contrail calculations.

More broadly, any undefined (nan values, or division by 0) segment ratio is set to 1. This convention ensures that the contrail calculations are not affected by undefined segment-based properties.

Presently, the output of this function is only used by `plume_temporal_evolution()` and `new_ice_particle_number()` as a scaling term.

A `seg_ratio` value of 1 is the same as not applying any scaling in these two functions.

`pycontrails.models.cocip.contrail_properties.temperature_adiabatic_heating(air_temperature,  
air_pressure,  
air_pressure_1)`

Calculate the ambient air temperature for each waypoint after the wake vortex phase.

This calculation accounts for adiabatic heating.

**Parameters**

- **air\_temperature** (`npt.NDArray[np.float64]`) – ambient temperature for each waypoint, [ $K$ ]
- **air\_pressure** (`npt.NDArray[np.float64]`) – initial pressure altitude at each waypoint, before the wake vortex phase, [ $Pa$ ]
- **air\_pressure\_1** (`npt.NDArray[np.float64]`) – pressure altitude at each waypoint, after the wake vortex phase, [ $Pa$ ]

**Returns**

`npt.NDArray[np.float64]` – ambient air temperature after the wake vortex phase, [ $K$ ]

**Notes**

Level 1, see Figure 1 of [Schumann, 2012]

**References**

- [Schumann, 2012]

`pycontrails.models.cocip.contrail_properties.vertical_diffusivity`(*air\_pressure, air\_temperature, dT\_dz, depth\_eff, terminal\_fall\_speed, sedimentation\_impact\_factor, eff\_heat\_rate*)

Calculate contrail vertical diffusivity.

**Parameters**

- **air\_pressure** (`npt.NDArray[np.float64]`) – Pressure altitude at each waypoint, [ $Pa$ ]
- **air\_temperature** (`npt.NDArray[np.float64]`) – Ambient temperature for each waypoint, [ $K$ ]
- **dT\_dz** (`npt.NDArray[np.float64]`) – Temperature gradient with respect to altitude ( $dz$ ), [ $K m^{-1}$ ]
- **depth\_eff** (`npt.NDArray[np.float64]`) – Effective depth of the contrail plume, [ $m$ ]
- **terminal\_fall\_speed** (`npt.NDArray[np.float64]`) – Terminal fall speed of contrail ice particles, [ $m s^{-1}$ ]
- **sedimentation\_impact\_factor** (`float`) – Enhancement parameter denoted by  $f_T$  in eq. (35) Schumann (2012).
- **eff\_heat\_rate** (`npt.NDArray[np.float64] | None`) – Effective heating rate, i.e., rate of which the contrail plume is heated, [ $K s^{-1}$ ]. If `None` is passed, the radiative heating effects on contrail cirrus properties are not included.

**Returns**

`npt.NDArray[np.float64]` – vertical diffusivity, [ $m^2 s^{-1}$ ]

## References

- [Schumann, 2012]
- [Schumann and Graf, 2013]

## Notes

Accounts for the turbulence-induced diffusive contrail spreading in the vertical direction. See eq. (35) of [Schumann, 2012].

The first term in Eq. (35) of [Schumann, 2012] is  $(c_V * w'_N{}^2 / N_{BV})$ , where  $c_V = 0.2$  and  $w'_N{}^2 = 0.1$  is different than outlined below. Here, a constant of 0.01 is used when radiative heating effects are not activated. This update comes from [Schumann and Graf, 2013], which found that the original formulation estimated thinner contrails relative to satellite observations. The vertical diffusivity was enlarged so that the simulated contrails are more consistent with observations.

## pycontrails.models.cocip.radiative\_forcing

Module for calculating radiative forcing of contrail cirrus.

## References

- [Schumann *et al.*, 2011]
- [Schumann *et al.*, 2012]

## Functions

|                                                                                                      |                                                                                                  |
|------------------------------------------------------------------------------------------------------|--------------------------------------------------------------------------------------------------|
| <code>albedo(sdr, rsr)</code>                                                                        | Calculate albedo along contrail waypoint.                                                        |
| <code>contrail_albedo(tau_contrail, mue, r_eff_um, ...)</code>                                       | Calculate the contrail albedo, $\alpha_c$ .                                                      |
| <code>contrail_contrail_overlap_radiative_effects(sdr, rsr, tau_contrail, mue, r_eff_um, ...)</code> | Calculate radiative properties after accounting for contrail overlapping.                        |
| <code>contrail_effective_emissivity(r_eff_um, delta_lr)</code>                                       | Calculate the effective emissivity of the contrail, $f_{lw}$ .                                   |
| <code>effective_radius_by_habit(r_vol_um, habit_idx)</code>                                          | Calculate the effective radius $r_{eff\_um}$ via the mean ice particle radius and habit type.    |
| <code>effective_radius_droxtal(r_vol_um)</code>                                                      | Calculate the effective radius of contrail ice particles assuming a droxtal particle habit.      |
| <code>effective_radius_hollow_column(r_vol_um)</code>                                                | Calculate the effective radius of ice particles assuming a hollow column particle habit.         |
| <code>effective_radius_myhre(r_vol_um)</code>                                                        | Calculate the effective radius of contrail ice particles assuming a sphere particle habit.       |
| <code>effective_radius_plate(r_vol_um)</code>                                                        | Calculate the effective radius of contrail ice particles assuming a plate particle habit.        |
| <code>effective_radius_rosette(r_vol_um)</code>                                                      | Calculate the effective radius of contrail ice particles assuming a rosette particle habit.      |
| <code>effective_radius_rough_aggregate(r_vol_um)</code>                                              | Calculate the effective radius of ice particles assuming a rough aggregate particle habit.       |
| <code>effective_radius_solid_column(r_vol_um)</code>                                                 | Calculate the effective radius of contrail ice particles assuming a solid column particle habit. |
| <code>effective_radius_sphere(r_vol_um)</code>                                                       | Calculate the effective radius of contrail ice particles assuming a sphere particle habit.       |
| <code>effective_tau_cirrus(tau_cirrus, mue, ...)</code>                                              | Calculate the effective optical depth of natural cirrus above the contrail, $e_{sw}$ .           |
| <code>habit_weight_regime_idx(r_vol_um, ...)</code>                                                  | Determine regime of ice particle habits based on contrail ice particle volume mean radius.       |
| <code>habit_weights(r_vol_um, habit_distributions, ...)</code>                                       | Assign weights to different ice particle habits for each waypoint.                               |
| <code>longwave_radiative_forcing(r_vol_um, olr, ...)</code>                                          | Calculate the local contrail longwave radiative forcing ( $RF_{LW}$ ).                           |
| <code>net_radiative_forcing(rf_lw, rf_sw)</code>                                                     | Calculate the local contrail net radiative forcing ( $rf_{net}$ ).                               |
| <code>olr_reduction_natural_cirrus(tau_cirrus, ...)</code>                                           | Calculate reduction in outgoing longwave radiation (OLR) due to the presence of natural cirrus.  |
| <code>shortwave_radiative_forcing(r_vol_um, sdr, ...)</code>                                         | Calculate the local contrail shortwave radiative forcing ( $RF_{SW}$ ).                          |

## Classes

|                            |                                                                            |
|----------------------------|----------------------------------------------------------------------------|
| <code>RFConstants()</code> | Constants that are used to calculate the local contrail radiative forcing. |
|----------------------------|----------------------------------------------------------------------------|

**class** `pycontrails.models.cocip.radiative_forcing.RFConstants`

Bases: `object`

Constants that are used to calculate the local contrail radiative forcing.

See Table 1 of [Schumann *et al.*, 2012].

Each coefficient has 8 elements, one corresponding to each contrail ice particle habit (shape):

```
[
  Sphere,
  Solid column,
  Hollow column,
  Rough aggregate,
  Rosette-6,
  Plate,
  Droxtal,
  Myhre,
]
```

For each waypoint, the distinct mix of ice particle habits are approximated using the mean contrail ice particle radius (`r_vol_um`) relative to `radius_threshold_um`.

For example:

- if `r_vol_um` for a waypoint < 5 um, the mix of ice particle habits will be 100% droxtals.
- if `r_vol_um` for a waypoint between 5 and 9.5 um, the mix of ice particle habits will be 30% solid columns, 70% droxtals.

See Table 2 from [Schumann *et al.*, 2011].

## References

- [Schumann *et al.*, 2011]
- [Schumann *et al.*, 2012]

```
A_mu = array([0.361226, 0.294072, 0.343894, 0.317866, 0.337227, 0.310978, 0.342593, 0.269179])
```

$A_\mu$  in Eq. (6) in [Schumann *et al.*, 2012]

```
B_mu = array([1.67592, 1.55687, 1.71065, 1.55843, 1.70782, 1.71789, 1.56399, 1.59015])
```

Approximate the SZA-dependent contrail sideward scattering  $B_\mu$  in Eq. (10) in [Schumann *et al.*, 2012]

```
C_mu = array([0.7093, 0.678016, 0.687546, 0.675315, 0.712041, 0.713317, 0.660267, 0.545716])
```

$C_\mu$  in Eq. (6) in [Schumann *et al.*, 2012]

```
F_r = array([0.511852, 0.576911, 0.597351, 0.22575, 0.550734, 0.817858, 0.249004, 0. ])
```

Approximates the effective contrail optical depth  $F_r$  in Eq. (7) and (8) in [Schumann *et al.*, 2012]

```
T_0 = array([152.237, 152.724, 152.923, 152.36, 151.879, 152.318, 165.692, 153.073])
```

Approximates the temperature of the atmosphere without contrails  $T_0$  in Eq. (2) in [Schumann *et al.*, 2012]

```
delta_lc = array([0.159942, 0.0958129, 0.092485, 0.0462023, 0.132925, 0.0870067, 0.0626339, 0.0665289])
```

Optical depth scaling factor for reduction of the OLR at the contrail level due to existing cirrus above the contrail  $\delta_{lc}$  in Eq. (4) in : cite : 'schumannParametricRadiativeForcing2012

```
delta_lr = array([0.211276, 0.341194, 0.325496, 0.255921, 0.170265, 1.65441 ,
0.201949, 0. ])
```

Effective radius scaling factor for optical properties (extinction relative to scattering)  $\delta_{lr}$  in Eq. (3) in : cite :  
'schumannParametricRadiativeForcing2012

```
delta_sc = array([0.157017, 0.143274, 0.167995, 0.148547, 0.173036, 0.162442,
0.171855, 0.213488])
```

Account for the optical depth of natural cirrus above the contrail  $\delta_{sc}$  in Eq. (11) in [Schumann *et al.*, 2012]

```
delta_sc_aps = array([0.229574, 0.197611, 0.245036, 0.204875, 0.248328, 0.254029,
0.244051, 0.302246])
```

```
delta_sr = array([0.149851 , 0.025427 , 0.0238836, 0.0463724, 0.0478892, 0.0700234,
0.0517942, 0. ])
```

Approximates the effective contrail optical depth  $\delta_{sr}$  in Eq. (7) and (8) in [Schumann *et al.*, 2012]

```
delta_t = array([0.940846, 0.808397, 0.736222, 0.675591, 0.748757, 0.708515,
0.927592, 0.795527])
```

Approximate the effective emmissivity factor  $\delta_{\tau}$  in : cite :  
'schumannParametricRadiativeForcing2012

```
gamma_lower = array([0.323166, 0.392598, 0.356189, 0.34504 , 0.407515, 0.523604,
0.310853, 0.274741])
```

Approximates the contrail reflectances  $\gamma$  in Eq. (9) in [Schumann *et al.*, 2012]

```
gamma_upper = array([0.241507, 0.347023, 0.288452, 0.296813, 0.327857, 0.43756 ,
0.27471 , 0.208154])
```

Approximates the contrail reflectances  $\Gamma$  in Eq. (9) in [Schumann *et al.*, 2012]

```
k_t = array([1.93466, 1.95456, 1.95994, 1.95906, 1.94397, 1.95123, 2.30363,
1.94611])
```

Linear approximation of Stefan-Boltzmann Law  $k_t$  in Eq. (2) in [Schumann *et al.*, 2012]

```
t_a = array([0.879119, 0.901701, 0.881812, 0.899144, 0.879896, 0.883212, 0.899096,
1.00744 ])
```

Approximates the dependence on the effective albedo  $t_a$ : Eq. (5) in [Schumann *et al.*, 2012]

`pycontrails.models.cocip.radiative_forcing.albedo(sdr, rsr)`

Calculate albedo along contrail waypoint.

Albedo, the diffuse reflection of solar radiation out of the total solar radiation, is computed based on the solar direct radiation (*sdr*) and reflected solar radiation (*rsr*).

Output values range between 0 (corresponding to a black body that absorbs all incident radiation) and 1 (a body that reflects all incident radiation).

#### Parameters

- `sdr` (`npt.NDArray[np.float64]`) – Solar direct radiation, [ $Wm^{-2}$ ]
- `rsr` (`npt.NDArray[np.float64]`) – Reflected solar radiation, [ $Wm^{-2}$ ]

#### Returns

`npt.NDArray[np.float64]` – Albedo value,  $[0 - 1]$

`pycontrails.models.cocip.radiative_forcing.contrail_albedo(tau_contrail, mue, r_eff_um, A_mu, B_mu, C_mu, delta_sr, F_r, gamma_lower, gamma_upper)`

Calculate the contrail albedo, `alpha_c`.

Refer to Eq. (6) of Schumann et al. (2012),

**Parameters**

- **tau\_contrail** (`npt.NDArray[np.float64]`) – Contrail optical depth for each waypoint
- **mue** (`npt.NDArray[np.float64]`) – Cosine of the solar zenith angle (theta),  $\text{mue} = \cos(\text{theta}) = \text{sdr}/\text{sd0}$
- **r\_eff\_um** (`npt.NDArray[np.float64]`) – Effective radius for each waypoint, `n_waypoints` x 8 (habit) columns, [ $\mu\text{m}$ ] See `effective_radius_habit()`.
- **A\_mu** (`npt.NDArray[np.float64]`) – Habit-specific parameter to approximate the albedo of the contrail
- **B\_mu** (`npt.NDArray[np.float64]`) – Habit-specific parameter to approximate the SZA-dependent contrail sideward scattering
- **C\_mu** (`npt.NDArray[np.float64]`) – Habit-specific parameter to approximate the albedo of the contrail
- **delta\_sr** (`npt.NDArray[np.float64]`) – Habit-specific parameter to approximate the effective contrail optical depth
- **F\_r** (`npt.NDArray[np.float64]`) – Habit-specific parameter to approximate the effective contrail optical depth
- **gamma\_lower** (`npt.NDArray[np.float64]`) – Habit-specific parameter to approximate the contrail reflectances
- **gamma\_upper** (`npt.NDArray[np.float64]`) – Habit-specific parameter to approximate the contrail reflectances

**Returns**

`npt.NDArray[np.float64]` – Contrail albedo for each waypoint and ice particle habit

`pycontrails.models.cocip.radiative_forcing.contrail_contrail_overlap_radiative_effects`(*contrails, habit\_distributions, radius\_threshold\_um, \*, min\_altitude\_m=600, max\_altitude\_m=130, dz\_overlap\_m=500.0, spatial\_grid\_res=0.25*)

Calculate radiative properties after accounting for contrail overlapping.

This function mutates the `contrails` parameter.

**Parameters**

- **contrails** (*GeoVectorDataset*) – Contrail waypoints at a given time. Must include the following variables: - `segment_length` - `width` - `r_ice_vol` - `tau_contrail` - `tau_cirrus` - `air_temperature` - `sdr` - `rsr` - `olr`
- **habit\_distributions** (`npt.NDArray[np.float64]`) – Habit weight distributions. See `CocipParams.habit_distributions`



- **radius\_threshold\_um** (`npt.NDArray[np.float64]`) – Radius thresholds for habit distributions. See `CocipParams.radius_threshold_um`
- **min\_altitude\_m** (`float`) – Minimum altitude domain in simulation, [*m*] See `CocipParams.min_altitude_m`
- **max\_altitude\_m** – Maximum altitude domain in simulation, [*m*] See `CocipParams.min_altitude_m`
- **dz\_overlap\_m** (`float`) – Altitude interval used to segment contrail waypoints, [*m*] See `CocipParams.dz_overlap_m`
- **spatial\_grid\_res** (`float`) – Spatial grid resolution, [deg]

#### Returns

`GeoVectorDataset` – Contrail waypoints at a given time with additional variables attached, including - `rsr_overlap` - `olr_overlap` - `tau_cirrus_overlap` - `rf_sw_overlap` - `rf_lw_overlap` - `rf_net_overlap`

#### References

- Schumann et al. (2021) Air traffic and contrail changes over Europe during COVID-19: A model study, *Atmos. Chem. Phys.*, 21, 7429–7450, <https://doi.org/10.5194/ACP-21-7429-2021>.
- Teoh et al. (2023) Global aviation contrail climate effects from 2019 to 2021.

#### Notes

- The radiative effects of contrail-contrail overlapping is approximated by changing the background RSR and OLR fields, and the overlying cirrus optical depth above the contrail.
- All contrail segments within each altitude interval are treated as one contrail layer, where they do not overlap. Contrail layers are processed starting from the bottom to the top.
- Refer to the Supporting Information (S4.3) of Teoh et al. (2023)

`pycontrails.models.cocip.radiative_forcing.contrail_effective_emissivity(r_eff_um, delta_lr)`  
Calculate the effective emissivity of the contrail, `f_lw`.

Refer to Eq. (3) of Schumann et al. (2012).

#### Parameters

- **r\_eff\_um** (`npt.NDArray[np.float64]`) – Effective radius for each waypoint, `n_waypoints` x 8 (habit) columns, [ $\mu\text{m}$ ] See `effective_radius_habit()`.
- **delta\_lr** (`npt.NDArray[np.float64]`) – Habit specific parameter to approximate the effective emissivity of the contrail.

#### Returns

`npt.NDArray[np.float64]` – Effective emissivity of the contrail

`pycontrails.models.cocip.radiative_forcing.effective_radius_by_habit(r_vol_um, habit_idx)`  
Calculate the effective radius `r_eff_um` via the mean ice particle radius and habit type.

The `habit_idx` corresponds to the habit types in `rf_const.habits`. Each habit type has a specific parameterization to calculate `r_eff_um` based on `r_vol_um`. derived from [Schumann *et al.*, 2011].

#### Parameters

- **r\_vol\_um** (`npt.NDArray[np.float64]`) – Contrail ice particle volume mean radius, [ $\mu\text{m}$ ]

- **habit\_idx** (`npt.NDArray[np.intp]`) – Habit type index for the contrail ice particle, corresponding to the habits in `rf_const.habits`.

**Returns**

`npt.NDArray[np.float64]` – Effective radius of ice particles for each combination of `r_vol_um` and `habit_idx`, [ $\mu\text{m}$ ]

**References**

- [Schumann *et al.*, 2011]

`pycontrails.models.cocip.radiative_forcing.effective_radius_droxtal(r_vol_um)`

Calculate the effective radius of contrail ice particles assuming a droxtal particle habit.

**Parameters**

`r_vol_um` (`npt.NDArray[np.float64]`) – Contrail ice particle volume mean radius, [ $\mu\text{m}$ ]

**Returns**

`npt.NDArray[np.float64]` – Effective radius, [ $\mu\text{m}$ ]

`pycontrails.models.cocip.radiative_forcing.effective_radius_hollow_column(r_vol_um)`

Calculate the effective radius of ice particles assuming a hollow column particle habit.

**Parameters**

`r_vol_um` (`npt.NDArray[np.float64]`) – Contrail ice particle volume mean radius, [ $\mu\text{m}$ ]

**Returns**

`npt.NDArray[np.float64]` – Effective radius, [ $\mu\text{m}$ ]

`pycontrails.models.cocip.radiative_forcing.effective_radius_myhre(r_vol_um)`

Calculate the effective radius of contrail ice particles assuming a sphere particle habit.

**Parameters**

`r_vol_um` (`npt.NDArray[np.float64]`) – Contrail ice particle volume mean radius, [ $\mu\text{m}$ ]

**Returns**

`npt.NDArray[np.float64]` – Effective radius, [ $\mu\text{m}$ ]

`pycontrails.models.cocip.radiative_forcing.effective_radius_plate(r_vol_um)`

Calculate the effective radius of contrail ice particles assuming a plate particle habit.

**Parameters**

`r_vol_um` (`npt.NDArray[np.float64]`) – Contrail ice particle volume mean radius, [ $\mu\text{m}$ ]

**Returns**

`npt.NDArray[np.float64]` – Effective radius, [ $\mu\text{m}$ ]

`pycontrails.models.cocip.radiative_forcing.effective_radius_rosette(r_vol_um)`

Calculate the effective radius of contrail ice particles assuming a rosette particle habit.

**Parameters**

`r_vol_um` (`npt.NDArray[np.float64]`) – Contrail ice particle volume mean radius, [ $\mu\text{m}$ ]

**Returns**

`npt.NDArray[np.float64]` – Effective radius, [ $\mu\text{m}$ ]

`pycontrails.models.cocip.radiative_forcing.effective_radius_rough_aggregate(r_vol_um)`

Calculate the effective radius of ice particles assuming a rough aggregate particle habit.

**Parameters**

**r\_vol\_um** (npt.NDArray[np.float64]) – Contrail ice particle volume mean radius, [ $\mu\text{m}$ ]

**Returns**

npt.NDArray[np.float64] – Effective radius, [ $\mu\text{m}$ ]

pycontrails.models.cocip.radiative\_forcing.**effective\_radius\_solid\_column**(*r\_vol\_um*)

Calculate the effective radius of contrail ice particles assuming a solid column particle habit.

**Parameters**

**r\_vol\_um** (npt.NDArray[np.float64]) – Contrail ice particle volume mean radius, [ $\mu\text{m}$ ]

**Returns**

npt.NDArray[np.float64] – Effective radius, [ $\mu\text{m}$ ]

pycontrails.models.cocip.radiative\_forcing.**effective\_radius\_sphere**(*r\_vol\_um*)

Calculate the effective radius of contrail ice particles assuming a sphere particle habit.

**Parameters**

**r\_vol\_um** (npt.NDArray[np.float64]) – Contrail ice particle volume mean radius, [ $\mu\text{m}$ ]

**Returns**

npt.NDArray[np.float64] – Effective radius, [ $\mu\text{m}$ ]

pycontrails.models.cocip.radiative\_forcing.**effective\_tau\_cirrus**(*tau\_cirrus*, *mue*, *delta\_sc*, *delta\_sc\_aps*)

Calculate the effective optical depth of natural cirrus above the contrail, *e\_sw*.

Refer to Eq. (11) of [Schumann *et al.*, 2012]. See Notes for a correction to the equation.

**Parameters**

- **tau\_cirrus** (npt.NDArray[np.float64]) – Optical depth of numerical weather prediction (NWP) cirrus above the contrail for each waypoint.
- **mue** (npt.NDArray[np.float64]) – Cosine of the solar zenith angle ( $\theta$ ),  $\text{mue} = \cos(\theta) = \text{sdr}/\text{sd0}$
- **delta\_sc** (npt.NDArray[np.float64]) – Habit-specific parameter to account for the optical depth of natural cirrus above the contrail
- **delta\_sc\_aps** (npt.NDArray[np.float64]) – Habit-specific parameter to account for the optical depth of natural cirrus above the contrail

**Returns**

npt.NDArray[np.float64] – Effective optical depth of natural cirrus above the contrail, *n\_waypoints* x 8 (habit) columns.

**Notes**

- In a personal correspondence, Dr. Schumann identified a print error in Eq. (11) in [Schumann *et al.*, 2012], where the positions of *delta\_sc\_aps* and *delta\_sc* should be swapped. The correct function is provided below.

pycontrails.models.cocip.radiative\_forcing.**habit\_weight\_regime\_idx**(*r\_vol\_um*, *radius\_threshold\_um*)

Determine regime of ice particle habits based on contrail ice particle volume mean radius.

**Parameters**

- **r\_vol\_um** (npt.NDArray[np.float64]) – Contrail ice particle volume mean radius, [ $\mu\text{m}$ ]

- **radius\_threshold\_um** (npt.NDArray[np.float64]) – Radius thresholds for habit distributions. See CocipParams.radius\_threshold\_um

**Returns**

npt.NDArray[np.intp] – Row index of the habit distribution in array CocipParams().habit\_distributions

pycontrails.models.cocip.radiative\_forcing.habit\_weights(*r\_vol\_um*, *habit\_distributions*, *radius\_threshold\_um*)

Assign weights to different ice particle habits for each waypoint.

For each waypoint, the distinct mix of ice particle habits are approximated using the mean contrail ice particle radius (*r\_vol\_um*) binned by *radius\_threshold\_um*.

For example:

- For waypoints with *r\_vol\_um* < 5 um, the mix of ice particle habits will be from Group 1 (100% Droxtals, refer to CocipParams().habit\_distributions).
- For waypoints with 5 um <= *r\_vol\_um* < 9.5 um, the mix of ice particle habits will be from Group 2 (30% solid columns, 70% droxtals)

**Parameters**

- **r\_vol\_um** (npt.NDArray[np.float64]) – Contrail ice particle volume mean radius, [ $\mu\text{m}$ ]
- **habit\_distributions** (npt.NDArray[np.float64]) – Habit weight distributions. See CocipParams().habit\_distributions
- **radius\_threshold\_um** (npt.NDArray[np.float64]) – Radius thresholds for habit distributions. See CocipParams.radius\_threshold\_um

**Returns**

npt.NDArray[np.float64] – Array with shape *n\_waypoints* x 8 columns, where each column is the weights to the ice particle habits,  $[[0 - 1]]$ , and the sum of each column should be equal to 1.

**Raises**

**ValueError** – Raises when *habit\_distributions* do not sum to 1 across columns or if there is a size mismatch with *radius\_threshold\_um*.

pycontrails.models.cocip.radiative\_forcing.longwave\_radiative\_forcing(*r\_vol\_um*, *olr*, *air\_temperature*, *tau\_contrail*, *tau\_cirrus*, *habit\_weights\_*, *r\_eff\_um=None*)

Calculate the local contrail longwave radiative forcing ( $RF_{LW}$ ).

All returned values are positive.

**Parameters**

- **r\_vol\_um** (npt.NDArray[np.float64]) – Contrail ice particle volume mean radius, [ $\mu\text{m}$ ]
- **olr** (npt.NDArray[np.float64]) – Outgoing longwave radiation at each waypoint, [ $\text{Wm}^{-2}$ ]
- **air\_temperature** (npt.NDArray[np.float64]) – Ambient temperature at each waypoint, [ $\text{K}$ ]
- **tau\_contrail** (npt.NDArray[np.float64]) – Contrail optical depth at each waypoint

- **tau\_cirrus** (`npt.NDArray[np.float64]`) – Optical depth of numerical weather prediction (NWP) cirrus above the contrail at each waypoint
- **habit\_weights\_** (`npt.NDArray[np.float64]`) – Weights to different ice particle habits for each waypoint, `n_waypoints x 8` (habit) columns, `[[0 – 1]]`
- **r\_eff\_um** (`npt.NDArray[np.float64]`, *optional*) – Provide effective radius corresponding to elements in `r_vol_um`, [ $\mu\text{m}$ ]. Defaults to `None`, which means the effective radius will be calculated using `r_vol_um` and habit types in `effective_radius_by_habit()`.

**Returns**

`npt.NDArray[np.float64]` – Local contrail longwave radiative forcing (positive), [ $\text{Wm}^{-2}$ ]

**Raises**

**ValueError** – If `r_eff_um` and `olr` have different shapes.

**References**

- [Schumann *et al.*, 2012]

`pycontrails.models.cocip.radiative_forcing.net_radiative_forcing(rf_lw, rf_sw)`

Calculate the local contrail net radiative forcing (`rf_net`).

RF Net = Longwave RF (positive) + Shortwave RF (negative)

**Parameters**

- **rf\_lw** (`npt.NDArray[np.float64]`) – local contrail longwave radiative forcing, [ $\text{Wm}^{-2}$ ]
- **rf\_sw** (`npt.NDArray[np.float64]`) – local contrail shortwave radiative forcing, [ $\text{Wm}^{-2}$ ]

**Returns**

`npt.NDArray[np.float64]` – local contrail net radiative forcing, [ $\text{Wm}^{-2}$ ]

`pycontrails.models.cocip.radiative_forcing.olr_reduction_natural_cirrus(tau_cirrus, delta_lc)`

Calculate reduction in outgoing longwave radiation (OLR) due to the presence of natural cirrus.

Natural cirrus has optical depth `tau_cirrus` above the contrail. See `e_lw` in Eq. (4) of Schumann *et al.* (2012).

**Parameters**

- **tau\_cirrus** (`npt.NDArray[np.float64]`) – Optical depth of numerical weather prediction (NWP) cirrus above the contrail for each waypoint.
- **delta\_lc** (`npt.NDArray[np.float64]`) – Habit specific parameter to approximate the reduction of the outgoing longwave radiation at the contrail level due to natural cirrus above the contrail.

**Returns**

`npt.NDArray[np.float64]` – Reduction of outgoing longwave radiation

`pycontrails.models.cocip.radiative_forcing.shortwave_radiative_forcing(r_vol_um, sdr, rsr, sd0, tau_contrail, tau_cirrus, habit_weights_, r_eff_um=None)`

Calculate the local contrail shortwave radiative forcing ( $RF_{SW}$ ).

All returned values are negative.

**Parameters**

- `r_vol_um` (`npt.NDArray[np.float64]`) – Contrail ice particle volume mean radius, [ $\mu\text{m}$ ]
- `sdr` (`npt.NDArray[np.float64]`) – Solar direct radiation, [ $\text{Wm}^{-2}$ ]
- `rsr` (`npt.NDArray[np.float64]`) – Reflected solar radiation, [ $\text{Wm}^{-2}$ ]
- `sd0` (`npt.NDArray[np.float64]`) – Solar constant, [ $\text{Wm}^{-2}$ ]
- `tau_contrail` (`npt.NDArray[np.float64]`) – Contrail optical depth for each waypoint
- `tau_cirrus` (`npt.NDArray[np.float64]`) – Optical depth of numerical weather prediction (NWP) cirrus above the contrail for each waypoint.
- `habit_weights_` (`npt.NDArray[np.float64]`) – Weights to different ice particle habits for each waypoint, `n_waypoints` x 8 (habit) columns,  $[[0 - 1]]$
- `r_eff_um` (`npt.NDArray[np.float64]`, *optional*) – Provide effective radius corresponding to elements in `r_vol_um`, [ $\mu\text{m}$ ]. Defaults to `None`, which means the effective radius will be calculated using `r_vol_um` and habit types in `effective_radius_by_habit()`.

**Returns**

`npt.NDArray[np.float64]` – Local contrail shortwave radiative forcing (negative), [ $\text{Wm}^{-2}$ ]

**Raises**

**ValueError** – If `r_eff_um` and `sdr` have different shapes.

**References**

- [Schumann *et al.*, 2012]

**pycontrails.models.cocip.wake\_vortex**

Wave-vortex downwash functions.

This module includes equations from the original CoCiP model [Schumann, 2012]. An alternative set of equations based on [Unterstrasser, 2016] is available in `unterstrasser_wake_vortex`.

**Unterstrasser Notes**

Improved estimation of the survival fraction of the contrail ice crystal number `f_surv` during the wake-vortex phase. This is a parameterised model that is developed based on outputs provided by large eddy simulations.

For comparison, CoCiP assumes that `f_surv` is equal to the change in the contrail ice water content (by mass) before and after the wake vortex phase. However, for larger (smaller) ice particles, their survival fraction by number could be smaller (larger) than their survival fraction by mass. This is particularly important in the “soot-poor” scenario, for example, in cleaner lean-burn engines where their soot emissions can be 3-4 orders of magnitude lower than conventional RQL engines.

## Functions

|                                                                     |                                                                                                 |
|---------------------------------------------------------------------|-------------------------------------------------------------------------------------------------|
| <code>downward_displacement_strongly_stratified(...)</code>         | Calculate the maximum contrail downward displacement under strongly stratified conditions.      |
| <code>downward_displacement_weakly_stratified(...)</code>           | Calculate the maximum contrail downward displacement under weakly/stably stratified conditions. |
| <code>effective_time_scale(wingspan, ...)</code>                    | Calculate the effective time scale of the wake vortex.                                          |
| <code>initial_contrail_depth(dz_max, ...)</code>                    | Calculate the initial contrail depth.                                                           |
| <code>initial_contrail_width(wingspan, dz_max)</code>               | Calculate the initial contrail width.                                                           |
| <code>max_downward_displacement(wingspan, ...)</code>               | Calculate the maximum contrail downward displacement after the wake vortex phase.               |
| <code>normalized_dissipation_rate(epsilon, ...)</code>              | Calculate the normalized dissipation rate of the sinking wake vortex.                           |
| <code>turbulent_kinetic_energy_dissipation_rate(ds, epsilon)</code> | Calculate the turbulent kinetic energy dissipation rate (epsilon).                              |
| <code>wake_vortex_separation(wingspan)</code>                       | Calculate the wake vortex separation.                                                           |

```
pycontrails.models.cocip.wake_vortex.downward_displacement_strongly_stratified(wingspan,
                                                                              true_airspeed,
                                                                              air-
                                                                              craft_mass,
                                                                              rho_air,
                                                                              n_bv)
```

Calculate the maximum contrail downward displacement under strongly stratified conditions.

### Parameters

- **wingspan** (`npt.NDArray[np.float64] | float`) – aircraft wingspan, [ $m$ ]
- **true\_airspeed** (`npt.NDArray[np.float64]`) – true airspeed for each waypoint, [ $ms^{-1}$ ]
- **aircraft\_mass** (`npt.NDArray[np.float64] | float`) – aircraft mass for each waypoint, [ $kg$ ]
- **rho\_air** (`npt.NDArray[np.float64]`) – density of air for each waypoint, [ $kgm^{-3}$ ]
- **n\_bv** (`npt.NDArray[np.float64]`) – Brunt-Vaisaila frequency, [ $s^{-1}$ ]

### Returns

`npt.NDArray[np.float64]` – Maximum contrail downward displacement, strongly stratified conditions, [ $m$ ]

### Notes

See section 2.5 (pg 547 - 548) of [Schumann, 2012].

## References

- [Schumann, 2012]

`pycontrails.models.cocip.wake_vortex.downward_displacement_weakly_stratified`(*wingspan*,  
*true\_airspeed*,  
*aircraft\_mass*,  
*rho\_air*, *n\_bv*,  
*dz\_max\_strong*,  
*ds\_dz*, *t\_0*,  
*effective\_vertical\_resolution*,  
*wind\_shear\_enhancement\_exponent*)

Calculate the maximum contrail downward displacement under weakly/stably stratified conditions.

### Parameters

- **wingspan** (`npt.NDArray[np.float64] | float`) – aircraft wingspan, [*m*]
- **true\_airspeed** (`npt.NDArray[np.float64]`) – true airspeed for each waypoint, [ $m s^{-1}$ ]
- **aircraft\_mass** (`npt.NDArray[np.float64] | float`) – aircraft mass for each waypoint, [*kg*]
- **rho\_air** (`npt.NDArray[np.float64]`) – density of air for each waypoint, [ $kg m^{-3}$ ]
- **n\_bv** (`npt.NDArray[np.float64]`) – Brunt-Vaisaila frequency, [ $s^{-1}$ ]
- **dz\_max\_strong** (`npt.NDArray[np.float64]`) – Max contrail downward displacement under strongly stratified conditions, [*m*]
- **ds\_dz** (`npt.NDArray[np.float64]`) – Difference in wind speed over *dz* in the atmosphere, [ $m s^{-1} / m$ ]
- **t\_0** (`npt.NDArray[np.float64]`) – Wake vortex effective time scale, [*s*]
- **effective\_vertical\_resolution** (`float`) – Passed through to `wind_shear.wind_shear_enhancement_factor()`, [*m*]
- **wind\_shear\_enhancement\_exponent** (`npt.NDArray[np.float64] | float`) – Passed through to `wind_shear.wind_shear_enhancement_factor()`

### Returns

`npt.NDArray[np.float64]` – Maximum contrail downward displacement, weakly/stably stratified conditions, [*m*]

## Notes

See section 2.5 (pg 548) of [Schumann, 2012].



## References

- [Schumann, 2012]

`pycontrails.models.cocip.wake_vortex.effective_time_scale(wingspan, true_airspeed, aircraft_mass, rho_air)`

Calculate the effective time scale of the wake vortex.

### Parameters

- **wingspan** (`npt.NDArray[np.float64]`) – aircraft wingspan, [*m*]
- **true\_airspeed** (`npt.NDArray[np.float64]`) – true airspeed for each waypoint, [*m s<sup>-1</sup>*]
- **aircraft\_mass** (`npt.NDArray[np.float64]`) – aircraft mass for each waypoint, [*kg*]
- **rho\_air** (`npt.NDArray[np.float64]`) – density of air for each waypoint, [*kg m<sup>-3</sup>*]

### Returns

`npt.NDArray[np.float64]` – Wake vortex effective time scale, [*s*]

## Notes

See section 2.5 (pg 547) of [Schumann, 2012].

## References

- [Schumann, 2012]

`pycontrails.models.cocip.wake_vortex.initial_contrail_depth(dz_max, initial_wake_vortex_depth)`

Calculate the initial contrail depth.

### Parameters

- **dz\_max** (`npt.NDArray[np.float64]`) – Max contrail downward displacement after the wake vortex phase, [*m*]
- **initial\_wake\_vortex\_depth** (`float | npt.NDArray[np.float64]`) – Initial wake vortex depth scaling factor. Denoted *C<sub>DO</sub>* in eq (14) in [Schumann, 2012].

### Returns

`npt.NDArray[np.float64]` – Initial contrail depth, [*m*]

`pycontrails.models.cocip.wake_vortex.initial_contrail_width(wingspan, dz_max)`

Calculate the initial contrail width.

### Parameters

- **wingspan** (`npt.NDArray[np.float64] | float`) – aircraft wingspan, [*m*]
- **dz\_max** (`npt.NDArray[np.float64]`) – Max contrail downward displacement after the wake vortex phase, [*m*] Only the size of this array is used; the values are ignored.

### Returns

`npt.NDArray[np.float64]` – Initial contrail width, [*m*]

`pycontrails.models.cocip.wake_vortex.max_downward_displacement`(*wingspan*, *true\_airspeed*, *aircraft\_mass*, *air\_temperature*, *dT\_dz*, *ds\_dz*, *air\_pressure*, *effective\_vertical\_resolution*, *wind\_shear\_enhancement\_exponent*)

Calculate the maximum contrail downward displacement after the wake vortex phase.

#### Parameters

- **wingspan** (`npt.NDArray[np.float64] | float`) – aircraft wingspan, [*m*]
- **true\_airspeed** (`npt.NDArray[np.float64]`) – true airspeed for each waypoint, [ $m s^{-1}$ ]
- **aircraft\_mass** (`npt.NDArray[np.float64] | float`) – aircraft mass for each waypoint, [*kg*]
- **air\_temperature** (`npt.NDArray[np.float64]`) – ambient temperature for each waypoint, [*K*]
- **dT\_dz** (`npt.NDArray[np.float64]`) – potential temperature gradient, [ $K m^{-1}$ ]
- **ds\_dz** (`npt.NDArray[np.float64]`) – Difference in wind speed over dz in the atmosphere, [ $m s^{-1} / m$ ]
- **air\_pressure** (`npt.NDArray[np.float64]`) – pressure altitude at each waypoint, [*Pa*]
- **effective\_vertical\_resolution** (`float`) – Passed through to `wind_shear.wind_shear_enhancement_factor()`, [*m*]
- **wind\_shear\_enhancement\_exponent** (`npt.NDArray[np.float64] | float`) – Passed through to `wind_shear.wind_shear_enhancement_factor()`

#### Returns

`npt.NDArray[np.float64]` – Max contrail downward displacement after the wake vortex phase, [*m*]

#### References

- [Holzäpfel, 2003]
- [Schumann, 2012]

`pycontrails.models.cocip.wake_vortex.normalized_dissipation_rate`(*epsilon*, *wingspan*, *true\_airspeed*, *aircraft\_mass*, *rho\_air*)

Calculate the normalized dissipation rate of the sinking wake vortex.

#### Parameters

- **epsilon** (`npt.NDArray[np.float64]`) – turbulent kinetic energy dissipation rate, [ $m^2 s^{-3}$ ]
- **wingspan** (`npt.NDArray[np.float64] | float`) – aircraft wingspan, [*m*]
- **true\_airspeed** (`npt.NDArray[np.float64]`) – true airspeed for each waypoint, [ $m s^{-1}$ ]
- **aircraft\_mass** (`npt.NDArray[np.float64]`) – aircraft mass for each waypoint, [*kg*]
- **rho\_air** (`npt.NDArray[np.float64]`) – density of air for each waypoint, [ $kg m^{-3}$ ]

#### Returns

`npt.NDArray[np.float64]` – Normalized dissipation rate of the sinking wake vortex

## Notes

See page 548 of [Schumann, 2012].

## References

- [Schumann, 2012]

`pycontrails.models.cocip.wake_vortex.turbulent_kinetic_energy_dissipation_rate(ds_dz, shear_enhancement_factor=1.0)`

Calculate the turbulent kinetic energy dissipation rate (epsilon).

The shear enhancement factor is used to account for any sub-grid scale turbulence.

### Parameters

- **ds\_dz** (`npt.NDArray[np.float64]`) – Difference in wind speed over dz in the atmosphere, [ $m s^{-1}/m$ ]
- **shear\_enhancement\_factor** (`npt.NDArray[np.float64] | float`) – Multiplication factor to enhance the wind shear

### Returns

`npt.NDArray[np.float64]` – turbulent kinetic energy dissipation rate, [ $m^2 s^{-3}$ ]

## Notes

- See eq. (37) in [Schumann, 2012].
- In a personal correspondence, Dr. Schumann identified a print error in Eq. (37) of the 2012 paper where the shear term should not be squared. The correct equation is listed in Eq. (13) [Schumann and Gerz, 1995].

## References

- [Schumann, 2012]
- [Schumann and Gerz, 1995]

`pycontrails.models.cocip.wake_vortex.wake_vortex_separation(wingspan)`

Calculate the wake vortex separation.

### Parameters

**wingspan** (`npt.NDArray[np.float64] | float`) – aircraft wingspan, [ $m$ ]

### Returns

`npt.NDArray[np.float64]` – wake vortex separation, [ $m$ ]

**pycontrails.models.cocip.wind\_shear**

Wind shear functions.

**Functions**

|                                                             |                                                                                        |
|-------------------------------------------------------------|----------------------------------------------------------------------------------------|
| <code>wind_shear(u_wind_top, u_wind_btm, ...)</code>        | Calculate the total wind shear.                                                        |
| <code>wind_shear_enhancement_factor(...)</code>             | Calculate the multiplication factor to enhance the wind shear based on contrail depth. |
| <code>wind_shear_normal(u_wind_top, u_wind_btm, ...)</code> | Calculate the total wind shear normal to an axis.                                      |

`pycontrails.models.cocip.wind_shear.wind_shear(u_wind_top, u_wind_btm, v_wind_top, v_wind_btm, dz)`

Calculate the total wind shear.

The total wind shear is the vertical gradient of the horizontal velocity.

**Parameters**

- **u\_wind\_top** (*ArrayScalarLike*) – u wind speed in the top layer, [ $m\ s^{-1}$ ]
- **u\_wind\_btm** (*ArrayScalarLike*) – u wind speed in the bottom layer, [ $m\ s^{-1}$ ]
- **v\_wind\_top** (*ArrayScalarLike*) – v wind speed in the top layer, [ $m\ s^{-1}$ ]
- **v\_wind\_btm** (*ArrayScalarLike*) – v wind speed in the bottom layer, [ $m\ s^{-1}$ ]
- **dz** (*float*) – Difference in altitude between measurements, [ $m$ ]

**Returns**

*ArrayScalarLike* – Total wind shear, [ $s^{-1}$ ]

`pycontrails.models.cocip.wind_shear.wind_shear_enhancement_factor(contrail_depth, effective_vertical_resolution, wind_shear_enhancement_exponent)`

Calculate the multiplication factor to enhance the wind shear based on contrail depth.

This factor accounts for any subgrid-scale that is not captured by the resolution of the meteorological datasets.

**Parameters**

- **contrail\_depth** (*npt.NDArray[np.float64]*) – Contrail depth, [ $m$ ]. Expected to be positive and bounded away from 0.
- **effective\_vertical\_resolution** (*float | npt.NDArray[np.float64]*) – Vertical resolution of met data, [ $m$ ]
- **wind\_shear\_enhancement\_exponent** (*float | npt.NDArray[np.float64]*) – Exponent used in calculation. Expected to be nonnegative. Discussed in paragraphs following eq. (39) in Schumann 2012 and referenced as  $n$ . When this parameter is 0, no enhancement occurs.

**Returns**

*npt.NDArray[np.float64]* – Wind shear enhancement factor

## Notes

Implementation based on eq (39) in [Schumann, 2012].

## References

- [Schumann, 2012]

`pycontrails.models.cocip.wind_shear.wind_shear_normal(u_wind_top, u_wind_btm, v_wind_top, v_wind_btm, cos_a, sin_a, dz)`

Calculate the total wind shear normal to an axis.

The total wind shear is the vertical gradient of the horizontal velocity.

### Parameters

- **u\_wind\_top** (*ArrayScalarLike*) – u wind speed in the top layer, [ $m\ s^{-1}$ ]
- **u\_wind\_btm** (*ArrayScalarLike*) – u wind speed in the bottom layer, [ $m\ s^{-1}$ ]
- **v\_wind\_top** (*ArrayScalarLike*) – v wind speed in the top layer, [ $m\ s^{-1}$ ]
- **v\_wind\_btm** (*ArrayScalarLike*) – v wind speed in the bottom layer, [ $m\ s^{-1}$ ]
- **cos\_a** (*ArrayScalarLike*) – Cosine component of segment
- **sin\_a** (*ArrayScalarLike*) – Sine component of segment
- **dz** (*float*) – Difference in altitude between measurements, [ $m$ ]

### Returns

*ArrayScalarLike* – Wind shear normal to axis, [ $s^{-1}$ ]

## 11.3.4 Gridded CoCiP

|                                                             |                                   |
|-------------------------------------------------------------|-----------------------------------|
| <code>models.cocipgrid.CocipGrid(met, rad[, params])</code> | Run CoCiP simulation on a grid.   |
| <code>models.cocipgrid.CocipGridParams(...)</code>          | Default parameters for CocipGrid. |

### pycontrails.models.cocipgrid.CocipGrid

**class** `pycontrails.models.cocipgrid.CocipGrid(met, rad, params=None, **params_kwargs)`

Bases: *Model*

Run CoCiP simulation on a grid.

See `eval()` for a description of model evaluation source parameters.

### Parameters

- **met, rad** (*MetDataset*) – CoCiP-specific met data to interpolate against
- **params** (*dict[str, Any]*, *optional*) – Override *CocipGridParams* defaults. Most notably, the model is highly dependent on the parameter `dt_integration`. Memory usage is also affected by parameters `met_slice_dt` and `target_split_size`.
- **param\_kwargs** (*Any*) – Override *CocipGridParams* defaults with arbitrary keyword arguments.

## Notes

- If `rad` contains accumulated radiative fluxes, differencing to obtain time-averaged fluxes will reduce the time coverage of `rad` by half a forecast step. A warning will be produced during `eval()` if the time coverage of `rad` (after differencing) is too short given the model evaluation parameters. If this occurs, provide an additional step of radiation data at the start or end of `rad`.

## References

- [Schumann *et al.*, 2011]
- [Schumann *et al.*, 2012]

## See also:

`CocipGridParams`, `Cocip`, `wake_vortex`, `contrail_properties`, `radiative_forcing`, `humidity_scaling`, `Emissions`, `sac`, `tau_cirrus`

`__init__(met, rad, params=None, **params_kwargs)`

## Methods

|                                                           |                                                                                          |
|-----------------------------------------------------------|------------------------------------------------------------------------------------------|
| <code>__init__(met, rad[, params])</code>                 |                                                                                          |
| <code>create_source(level, time[, longitude, ...])</code> | Shortcut to create a <code>MetDataset</code> source from coordinate arrays.              |
| <code>downselect_met()</code>                             | Downselect <code>met</code> domain to the max/min bounds of <code>source</code> .        |
| <code>eval([source])</code>                               | Run CoCiP simulation on a 4d coordinate grid or arbitrary set of 4d points.              |
| <code>get_source_param(key[, default, set_attr])</code>   | Get source data with default set by parameter key.                                       |
| <code>require_met()</code>                                | Ensure that <code>met</code> is a <code>MetDataset</code> .                              |
| <code>require_source_type(type_)</code>                   | Ensure that <code>source</code> is <code>type_</code> .                                  |
| <code>set_source([source])</code>                         | Attach original or copy of input <code>source</code> to <code>source</code> .            |
| <code>set_source_met([optional, variable])</code>         | Ensure or interpolate each required <code>met_variables</code> on <code>source</code> .  |
| <code>transfer_met_source_attrs([source])</code>          | Transfer <code>met</code> source metadata from <code>met</code> to <code>source</code> . |
| <code>update_params([params])</code>                      | Update model parameters on <code>params</code> .                                         |

## Attributes

|                                      |                                                                                                                                                                           |
|--------------------------------------|---------------------------------------------------------------------------------------------------------------------------------------------------------------------------|
| <code>rad</code>                     |                                                                                                                                                                           |
| <code>timesteps</code>               |                                                                                                                                                                           |
| <code>contrail</code>                |                                                                                                                                                                           |
| <code>contrail_list</code>           | Artifacts attached when parameter <code>verbose_outputs_evolution</code> is True These allow for some additional information and parity with the approach taken by Cocip. |
| <code>hash</code>                    | Generate a unique hash for model instance.                                                                                                                                |
| <code>interp_kwargs</code>           | Shortcut to create interpolation arguments from params.                                                                                                                   |
| <code>long_name</code>               |                                                                                                                                                                           |
| <code>met</code>                     | Met data is not optional                                                                                                                                                  |
| <code>met_required</code>            | Require meteorology is not None on <code>__init__()</code>                                                                                                                |
| <code>met_variables</code>           | Required meteorology pressure level variables.                                                                                                                            |
| <code>name</code>                    |                                                                                                                                                                           |
| <code>params</code>                  | Instantiated model parameters, in dictionary form                                                                                                                         |
| <code>processed_met_variables</code> | Set of required parameters if processing already complete on met input.                                                                                                   |
| <code>rad_variables</code>           |                                                                                                                                                                           |
| <code>source</code>                  | Last evaluated input source                                                                                                                                               |
| <code>source_time</code>             | Return the time array of the source data.                                                                                                                                 |
| <code>optional_met_variables</code>  | Optional meteorology variables                                                                                                                                            |

## contrail

### contrail\_list

Artifacts attached when parameter `verbose_outputs_evolution` is True These allow for some additional information and parity with the approach taken by Cocip.

**static create\_source**(*level*, *time*, *longitude=None*, *latitude=None*, *lon\_step=1.0*, *lat\_step=1.0*)

Shortcut to create a MetDataset source from coordinate arrays.

### Parameters

- **level** (*level*: `npt.NDArray[np.float64]` | `list[float]` | `float`) – Pressure levels for gridded cocip. To avoid interpolating outside of the passed met and rad data, this parameter should avoid the extreme values of the met and *rad* levels. If met is already defined, a good choice for level is `met.data['level'].values[1: -1]`.
- **time** (`npt.NDArray[np.datetime64]` | `list[np.datetime64]` | `np.datetime64`,) – One or more time values for gridded cocip.
- **longitude, latitude** (`npt.NDArray[np.float64]` | `list[float]`, *optional*) – Longitude and latitude arrays, by default None. If not specified, values of `lon_step` and `lat_step` are used to define longitude and latitude. To avoid model degradation at the poles, latitude values are expected to be between -80 and 80 degrees.

- **lon\_step, lat\_step** (*float, optional*) – Longitude and latitude resolution, by default 1.0. Only used if parameter `longitude` (respective `latitude`) not specified.

**Returns**

*MetDataset* – *MetDataset* that can be used as source input to `CocipGrid.eval(source=...)`

**See also:**

`MetDataset.from_coords()`

**default\_params**

alias of *CocipGridParams*

**eval**(*source=None, \*\*params*)

Run CoCiP simulation on a 4d coordinate grid or arbitrary set of 4d points.

If the params `verbose_outputs_evolution` is `True`, the model holds *contrail\_list* and *contrail* attributes for viewing intermediate artifacts. If source data is large, these intermediate vectors may consume substantial memory.

Changed in version 0.25.0: No longer explicitly support `Flight` as a source. Any flight source will be viewed as a `GeoVectorDataset`. In order to evaluate CoCiP predictions over a flight trajectory, it is best to use the `Cocip` model. It's also possible to pre-compute segment azimuth and true airspeed before passing the flight trajectory in here.

**Parameters**

- **source** (`GeoVectorDataset` | `MetDataset` | `None`) – Input `GeoVectorDataset` or `MetDataset`. If `None`, a `NotImplementedError` is raised. If any subclass of `GeoVectorDataset` is passed (e.g., `Flight`), the additional structure is forgotten and the model is evaluated as if it were a `GeoVectorDataset`. Additional variables may be passed as source data or attrs. These include:
  - `aircraft_type`: This overrides any value in `params`. Must be included in the source attrs (not data).
  - `fuel_flow`, `engine_efficiency`, `true_airspeed`, `wingspan`, `aircraft_mass`: These override any value in `params`.
  - `azimuth`: This overrides any value in `params`.
  - `segment_length`: This overrides any value in `params`.
- **\*\*params** (`Any`) – Overwrite model parameters before eval

**Returns**

`GeoVectorDataset` | `MetDataset` – CoCiP predictions for each point in source. Output data contains variables `contrail_age` and `ef_per_m`. Additional variables specified by the model params `verbose_outputs_formation` are also included.

**Raises**

`NotImplementedError` – If source is `None`



## Notes

At a high level, the model is broken down into the following steps:

- Convert any MetDataset source to GeoVectorDataset.
- Split the source into chunks of size `params["target_split_size"]`.
- For each timestep in *timesteps*:
  - Generate any new waypoints from the source data. Calculate aircraft performance and run the CoCiP downwash routine over the new waypoints.
  - For each “active” contrail (i.e., a contrail that has been initialized but has not yet reach its end of life), evolve the contrail forward one step. Filter any waypoint that has reached its end of life.
- Aggregate contrail age and energy forcing predictions to a single output variable to return.

```
long_name = 'Gridded Contrail Cirrus Prediction Model'
```

```
met_required = True
```

```
Require meteorology is not None on __init__()
```

```

met_variables = (MetVariable(short_name='t', standard_name='air_temperature',
long_name='Air Temperature', level_type='isobaricInhPa', ecmwf_id=130, grib1_id=11,
grib2_id=(0, 0, 0), units='K', amip='ta', description='Air temperature is the bulk
temperature of the air, not the surface (skin) temperature.'),
MetVariable(short_name='q', standard_name='specific_humidity', long_name='Specific
Humidity', level_type='isobaricInhPa', ecmwf_id=133, grib1_id=51, grib2_id=(0, 1,
0), units='kg kg**-1', amip='hus', description='Specific means per unit mass.
Specific humidity is the mass fraction of water vapor in (moist) air.'),
MetVariable(short_name='u', standard_name='eastward_wind', long_name='Eastward
Wind', level_type='isobaricInhPa', ecmwf_id=131, grib1_id=33, grib2_id=(0, 2, 2),
units='m s**-1', amip='ua', description='"Eastward" indicates a vector component
which is positive when directed eastward (negative westward). Wind is defined as a
two-dimensional (horizontal) air velocity vector, with no vertical component.'),
MetVariable(short_name='v', standard_name='northward_wind', long_name='Northward
Wind', level_type='isobaricInhPa', ecmwf_id=132, grib1_id=34, grib2_id=(0, 2, 3),
units='m s**-1', amip='va', description='"Northward" indicates a vector component
which is positive when directed northward (negative southward). Wind is defined as a
two-dimensional (horizontal) air velocity vector, with no vertical component.'),
MetVariable(short_name='w', standard_name='lagrangian_tendency_of_air_pressure',
long_name='Vertical Velocity (omega)', level_type='isobaricInhPa', ecmwf_id=135,
grib1_id=39, grib2_id=(0, 2, 8), units='Pa s**-1', amip='wap', description='The
Lagrangian tendency of air pressure, often called "omega", plays the role of the
upward component of air velocity when air pressure is being used as the vertical
coordinate. If the vertical air velocity is upwards, it is negative when expressed
as a tendency of air pressure; downwards is positive. Air pressure is the force per
unit area which would be exerted when the moving gas molecules of which the air is
composed strike a theoretical surface of any orientation.'),
(MetVariable(short_name='ciwc', standard_name='specific_cloud_ice_water_content',
long_name='Specific cloud ice water content', level_type='isobaricInhPa',
ecmwf_id=247, grib1_id=None, grib2_id=(0, 1, 84), units='kg kg**-1', amip=None,
description="This parameter is the mass of cloud ice particles per kilogram of the
total mass of moist air. The 'total mass of moist air' is the sum of the dry air,
water vapour, cloud liquid, cloud ice, rain and falling snow. This parameter
represents the average value for a grid box."), MetVariable(short_name='icmr',
standard_name='ice_water_mixing_ratio', long_name='Cloud ice water mixing ratio',
level_type='isobaricInhPa', ecmwf_id=260019, grib1_id=None, grib2_id=(0, 1, 23),
units='kg kg**-1', amip=None, description='This parameter is the mass of cloud ice
particles per kilogram of the total mass of dry air. ')))

```

Required meteorology pressure level variables. Each element in the list is a MetVariable or a tuple[MetVariable]. If element is a tuple[MetVariable], the variable depends on the data source. Only one variable in the tuple is required.

```
name = 'contrail_grid'
```

```

processed_met_variables = (MetVariable(short_name='t',
standard_name='air_temperature', long_name='Air Temperature',
level_type='isobaricInhPa', ecmwf_id=130, grib1_id=11, grib2_id=(0, 0, 0),
units='K', amip='ta', description='Air temperature is the bulk temperature of the
air, not the surface (skin) temperature. '), MetVariable(short_name='q',
standard_name='specific_humidity', long_name='Specific Humidity',
level_type='isobaricInhPa', ecmwf_id=133, grib1_id=51, grib2_id=(0, 1, 0), units='kg
kg**-1', amip='hus', description='Specific means per unit mass. Specific humidity is
the mass fraction of water vapor in (moist) air. '), MetVariable(short_name='u',
standard_name='eastward_wind', long_name='Eastward Wind',
level_type='isobaricInhPa', ecmwf_id=131, grib1_id=33, grib2_id=(0, 2, 2), units='m
s**-1', amip='ua', description='"Eastward" indicates a vector component which is
positive when directed eastward (negative westward). Wind is defined as a
two-dimensional (horizontal) air velocity vector, with no vertical component. '),
MetVariable(short_name='v', standard_name='northward_wind', long_name='Northward
Wind', level_type='isobaricInhPa', ecmwf_id=132, grib1_id=34, grib2_id=(0, 2, 3),
units='m s**-1', amip='va', description='"Northward" indicates a vector component
which is positive when directed northward (negative southward). Wind is defined as a
two-dimensional (horizontal) air velocity vector, with no vertical component. '),
MetVariable(short_name='w', standard_name='lagrangian_tendency_of_air_pressure',
long_name='Vertical Velocity (omega)', level_type='isobaricInhPa', ecmwf_id=135,
grib1_id=39, grib2_id=(0, 2, 8), units='Pa s**-1', amip='wap', description='The
Lagrangian tendency of air pressure, often called "omega", plays the role of the
upward component of air velocity when air pressure is being used as the vertical
coordinate. If the vertical air velocity is upwards, it is negative when expressed
as a tendency of air pressure; downwards is positive. Air pressure is the force per
unit area which would be exerted when the moving gas molecules of which the air is
composed strike a theoretical surface of any orientation. '),
MetVariable(short_name='tau_cirrus', standard_name='tau_cirrus', long_name='Cirrus
optical depth', level_type=None, ecmwf_id=None, grib1_id=None, grib2_id=None,
units='dimensionless', amip=None, description=None))

```

Set of required parameters if processing already complete on met input.

rad

```
rad_variables = ((MetVariable(short_name='tsr',
standard_name='top_net_solar_radiation', long_name='Top of atmosphere net solar
(shortwave) radiation', level_type='nominalTop', ecmwf_id=178, grib1_id=None,
grib2_id=(0, 4, 1), units='J m**-2', amip=None, description="This parameter is the
incoming solar radiation (also known as shortwave radiation) minus the outgoing
solar radiation at the top of the atmosphere. It is the amount of radiation passing
through a horizontal plane. The incoming solar radiation is the amount received from
the Sun. The outgoing solar radiation is the amount reflected and scattered by the
Earth's atmosphere and surfaceSee https://www.ecmwf.int/sites/default/files/
elibrary/2015/18490-radiation-quantities-ecmwf-model-and-mars.pdf"),
MetVariable(short_name='uswrf', standard_name='toa_upward_shortwave_flux',
long_name='Top of atmosphere upward shortwave radiation', level_type='nominalTop',
ecmwf_id=None, grib1_id=None, grib2_id=(0, 4, 193), units='W m**-2', amip=None,
description='This parameter is the outgoing shortwave (solar) radiation at the
nominal top of the atmosphere.')), (MetVariable(short_name='ttr',
standard_name='top_net_thermal_radiation', long_name='Top of atmosphere net thermal
(longwave) radiation', level_type='nominalTop', ecmwf_id=179, grib1_id=None,
grib2_id=(0, 5, 5), units='J m**-2', amip=None, description='The thermal (also known
as terrestrial or longwave) radiation emitted to space at the top of the atmosphere
is commonly known as the Outgoing Longwave Radiation (OLR). The top net thermal
radiation (this parameter) is equal to the negative of OLR.See
https://www.ecmwf.int/sites/default/files/elibrary/2015/
18490-radiation-quantities-ecmwf-model-and-mars.pdf'),
MetVariable(short_name='ulwrf', standard_name='toa_upward_longwave_flux',
long_name='Top of atmosphere upward longwave radiation', level_type='nominalTop',
ecmwf_id=None, grib1_id=None, grib2_id=(0, 5, 193), units='W m**-2', amip=None,
description='This parameter is the outgoing longwave (thermal) radiation at the
nominal top of the atmosphere.')))
```

`property source_time`

Return the time array of the source data.

`timesteps`

[pycontrails.models.cocipgrid.CocipGridParams](#)

```

class pycontrails.models.cocipgrid.CocipGridParams(copy_source=True,
            interpolation_method='linear',
            interpolation_bounds_error=False,
            interpolation_fill_value=nan,
            interpolation_localize=False,
            interpolation_use_indices=False,
            interpolation_q_method=None, verify_met=True,
            downselect_met=True,
            met_longitude_buffer=(10.0, 10.0),
            met_latitude_buffer=(10.0, 10.0),
            met_level_buffer=(40.0, 40.0),
            met_time_buffer=(numpy.timedelta64(0, 'h'),
            numpy.timedelta64(0, 'h')),
            process_emissions=True,
            dt_integration=numpy.timedelta64(30, 'm'),
            dz_m=200.0,
            effective_vertical_resolution=2000.0,
            smooth_true_airspeed=True,
            smooth_true_airspeed_window_length=7,
            smooth_true_airspeed_polyorder=1,
            humidity_scaling=None,
            compute_tau_cirrus_in_model_init='auto',
            filter_sac=True, filter_initially_persistent=True,
            persistent_buffer=None, verbose_outputs=False,
            compute_atr20=False,
            global_rf_to_atr20_factor=0.0151,
            initial_wake_vortex_depth=0.5,
            sedimentation_impact_factor=0.5,
            default_nvpm_ei_n=1000000000000000.0,
            wind_shear_enhancement_exponent=0.5,
            nvpm_ei_n_enhancement_factor=1.0,
            min_ice_particle_number_nvpm_ei_n=10000000000000.0,
            max_depth=1500.0,
            unterstrasser_ice_survival_fraction=False,
            radiative_heating_effects=False,
            contrail_contrail_overlapping=False,
            dz_overlap_m=500.0,
            radius_threshold_um=<factory>,
            habits=<factory>,
            habit_distributions=<factory>,
            rf_sw_enhancement_factor=1.0,
            rf_lw_enhancement_factor=1.0,
            min_altitude_m=6000.0,
            max_altitude_m=13000.0,
            max_seg_length_m=40000.0,
            max_age=numpy.timedelta64(20, 'h'),
            min_tau=1e-06, max_tau=1000000000.0,
            min_n_ice_per_m3=1000.0,
            max_n_ice_per_m3=1e+20,
            target_split_size=100000,
            target_split_size_pre_SAC_boost=3.0,
            show_progress=True, segment_length=1000.0,
            fuel=<factory>, aircraft_type='B737',
            engine_uid=None, azimuth=0.0,
            ds_n_dz_factor=0.0, wingspan=None,
            aircraft_mass=None, true_airspeed=None,
            engine_efficiency=None, fuel_flow=None,
            aircraft_performance=None,
            verbose_outputs_formation=False,
            verbose_outputs_evolution=False)

```

Bases: [CocipParams](#)

Default parameters for [CocipGrid](#).

```
__init__(copy_source=True, interpolation_method='linear', interpolation_bounds_error=False,
         interpolation_fill_value=nan, interpolation_localize=False, interpolation_use_indices=False,
         interpolation_q_method=None, verify_met=True, downselect_met=True,
         met_longitude_buffer=(10.0, 10.0), met_latitude_buffer=(10.0, 10.0), met_level_buffer=(40.0,
         40.0), met_time_buffer=(numpy.timedelta64(0, 'h'), numpy.timedelta64(0, 'h')),
         process_emissions=True, dt_integration=numpy.timedelta64(30, 'm'), dz_m=200.0,
         effective_vertical_resolution=2000.0, smooth_true_airspeed=True,
         smooth_true_airspeed_window_length=7, smooth_true_airspeed_polyorder=1,
         humidity_scaling=None, compute_tau_cirrus_in_model_init='auto', filter_sac=True,
         filter_initially_persistent=True, persistent_buffer=None, verbose_outputs=False,
         compute_atr20=False, global_rf_to_atr20_factor=0.0151, initial_wake_vortex_depth=0.5,
         sedimentation_impact_factor=0.5, default_nvpm_ei_n=1000000000000000.0,
         wind_shear_enhancement_exponent=0.5, nvpm_ei_n_enhancement_factor=1.0,
         min_ice_particle_number_nvpm_ei_n=1000000000000000.0, max_depth=1500.0,
         unterstrasser_ice_survival_fraction=False, radiative_heating_effects=False,
         contrail_contrail_overlapping=False, dz_overlap_m=500.0, radius_threshold_um=<factory>,
         habits=<factory>, habit_distributions=<factory>, rf_sw_enhancement_factor=1.0,
         rf_lw_enhancement_factor=1.0, min_altitude_m=6000.0, max_altitude_m=13000.0,
         max_seg_length_m=40000.0, max_age=numpy.timedelta64(20, 'h'), min_tau=1e-06,
         max_tau=100000000000.0, min_n_ice_per_m3=1000.0, max_n_ice_per_m3=1e+20,
         target_split_size=100000, target_split_size_pre_SAC_boost=3.0, show_progress=True,
         segment_length=1000.0, fuel=<factory>, aircraft_type='B737', engine_uid=None, azimuth=0.0,
         dsn_dz_factor=0.0, wingspan=None, aircraft_mass=None, true_airspeed=None,
         engine_efficiency=None, fuel_flow=None, aircraft_performance=None,
         verbose_outputs_formation=False, verbose_outputs_evolution=False)
```

## Methods

|                                           |                               |
|-------------------------------------------|-------------------------------|
| <code>__init__([copy_source, ...])</code> |                               |
| <code>as_dict()</code>                    | Convert object to dictionary. |

## Attributes

|                                               |                                                                                                    |
|-----------------------------------------------|----------------------------------------------------------------------------------------------------|
| <code>aircraft_mass</code>                    | Nominal aircraft mass, [ <i>kg</i> ].                                                              |
| <code>aircraft_performance</code>             | Aircraft performance model.                                                                        |
| <code>aircraft_type</code>                    | ICAO code designating simulated aircraft type.                                                     |
| <code>azimuth</code>                          | Navigation bearing [ <i>deg</i> ] measured in clockwise direction from true north, by default 0.0. |
| <code>compute_atr20</code>                    | Add additional metric of ATR20 and global yearly mean RF to model output.                          |
| <code>compute_tau_cirrus_in_model_init</code> | Compute "tau_cirrus" variable in pressure-level met data during model initialization.              |
| <code>contrail_contrail_overlapping</code>    | Experimental.                                                                                      |
| <code>copy_source</code>                      | Copy input source data on eval                                                                     |

continues on next page

Table 7 – continued from previous page

|                               |                                                                                                                                                                                                              |
|-------------------------------|--------------------------------------------------------------------------------------------------------------------------------------------------------------------------------------------------------------|
| default_nvpm_ei_n             | Default nvpm_ei_n value if no data provided and emissions calculations fails.                                                                                                                                |
| downselect_met                | Downselect input MetDataset` to region around source.                                                                                                                                                        |
| <i>dsn_dz_factor</i>          | Experimental parameter used to approximate dsn_dz from ds_dz via $dsn\_dz = ds\_dz * dsn\_dz\_factor$ .                                                                                                      |
| dt_integration                | Apply Euler's method with a fixed step size of dt_integration.                                                                                                                                               |
| dz_m                          | Difference in altitude between top and bottom layer for stratification calculations, [m].                                                                                                                    |
| dz_overlap_m                  | Experimental.                                                                                                                                                                                                |
| effective_vertical_resolution | Vertical resolution (m) associated to met data.                                                                                                                                                              |
| <i>engine_efficiency</i>      | Nominal engine efficiency, [0 – 1].                                                                                                                                                                          |
| <i>engine_uid</i>             | Engine unique identification number for the ICAO Aircraft Emissions Databank (EDB) If None, an assumed engine_uid is used in Emissions.                                                                      |
| filter_initially_persistent   | Filter out waypoints if they don't satisfy the initial persistent criteria Passing in a non-default value is unusual, but is included to allow for false negative calibration and model uncertainty studies. |
| filter_sac                    | Filter out waypoints if the don't satisfy the SAC criteria Note that the SAC algorithm will still be run to calculate T_critical_sac for use estimating initial ice particle number.                         |
| <i>fuel_flow</i>              | Nominal fuel flow, [ $kg\ s^{-1}$ ].                                                                                                                                                                         |
| global_rf_to_atr20_factor     | Constant factor used to convert global- and year-mean RF, [ $W\ m^{-2}$ ], to ATR20, [K], given by [Yin <i>et al.</i> , 2023].                                                                               |
| humidity_scaling              | Humidity scaling                                                                                                                                                                                             |
| initial_wake_vortex_depth     | Initial wake vortex depth scaling factor.                                                                                                                                                                    |
| interpolation_bounds_error    | If True, points lying outside interpolation will raise an error                                                                                                                                              |
| interpolation_fill_value      | Used for outside interpolation value if interpolation_bounds_error is False                                                                                                                                  |
| interpolation_localize        | Experimental.                                                                                                                                                                                                |
| interpolation_method          | Interpolation method.                                                                                                                                                                                        |
| interpolation_q_method        | Experimental.                                                                                                                                                                                                |
| interpolation_use_indices     | Experimental.                                                                                                                                                                                                |
| max_age                       | Max age of contrail evolution.                                                                                                                                                                               |
| max_altitude_m                | Maximum altitude domain in simulation, [m] If set to None, this check is disabled.                                                                                                                           |
| max_depth                     | Upper bound for contrail plume depth, constraining it to realistic values.                                                                                                                                   |
| max_n_ice_per_m3              | Maximum contrail ice particle number per volume of air to prevent unrealistic values.                                                                                                                        |
| max_seg_length_m              | Maximum contrail segment length in simulation to prevent unrealistic values, [m].                                                                                                                            |
| max_tau                       | Maximum contrail optical depth to prevent unrealistic values.                                                                                                                                                |
| met_latitude_buffer           | Met latitude buffer [WGS84] for Cocip evolution.                                                                                                                                                             |

continues on next page

Table 7 – continued from previous page

|                                                  |                                                                                                                                                                                     |
|--------------------------------------------------|-------------------------------------------------------------------------------------------------------------------------------------------------------------------------------------|
| <code>met_level_buffer</code>                    | Met level buffer [ $hPa$ ] for Cocip initialization and evolution.                                                                                                                  |
| <code>met_longitude_buffer</code>                | Met longitude [WGS84] buffer for Cocip evolution.                                                                                                                                   |
| <code>met_time_buffer</code>                     | Met time buffer for input to <code>Flight.downselect_met()</code> Only applies when <code>downselect_met</code> is <code>True</code> .                                              |
| <code>min_altitude_m</code>                      | Minimum altitude domain in simulation, [ $m$ ] If set to <code>None</code> , this check is disabled.                                                                                |
| <code>min_ice_particle_number_nvpm_ei_n</code>   | Lower bound for <code>nvpm_ei_n</code> to account for ambient aerosol particles for newer engines, [ $kg^{-1}$ ]                                                                    |
| <code>min_n_ice_per_m3</code>                    | Minimum contrail ice particle number per volume of air.                                                                                                                             |
| <code>min_tau</code>                             | Minimum contrail optical depth.                                                                                                                                                     |
| <code>nvpm_ei_n_enhancement_factor</code>        | Multiply flight black carbon number by enhancement factor.                                                                                                                          |
| <code>persistent_buffer</code>                   | Continue evolving contrail waypoints <code>persistent_buffer</code> beyond end of contrail life.                                                                                    |
| <code>process_emissions</code>                   | Determines whether <code>Cocip.process_emissions()</code> runs on model <code>Cocip.eval()</code> Set to <code>False</code> when input <code>Flight</code> includes emissions data. |
| <code>radiative_heating_effects</code>           | Experimental.                                                                                                                                                                       |
| <code>rf_lw_enhancement_factor</code>            | Scale longwave radiative forcing.                                                                                                                                                   |
| <code>rf_sw_enhancement_factor</code>            | Scale shortwave radiative forcing.                                                                                                                                                  |
| <code>sedimentation_impact_factor</code>         | Sedimentation impact factor.                                                                                                                                                        |
| <code>segment_length</code>                      | Nominal segment length to place at each grid point [ $m$ ].                                                                                                                         |
| <code>show_progress</code>                       | Display <code>tqdm</code> progress bar showing batch evaluation progress.                                                                                                           |
| <code>smooth_true_airspeed</code>                | Smoothing parameters for true airspeed.                                                                                                                                             |
| <code>smooth_true_airspeed_polyorder</code>      |                                                                                                                                                                                     |
| <code>smooth_true_airspeed_window_length</code>  |                                                                                                                                                                                     |
| <code>target_split_size</code>                   | Approximate size of a typical <code>numpy.ndarray</code> used with in CoCiP calculations.                                                                                           |
| <code>target_split_size_pre_SAC_boost</code>     | Additional boost to target split size before SAC is computed.                                                                                                                       |
| <code>true_airspeed</code>                       | Cruising true airspeed, [ $m s^{-1}$ ].                                                                                                                                             |
| <code>unterstrasser_ice_survival_fraction</code> | Experimental.                                                                                                                                                                       |
| <code>verbose_outputs</code>                     | Add additional values to the flight and contrail that are not explicitly necessary for calculation.                                                                                 |
| <code>verbose_outputs_evolution</code>           | Attach contrail evolution data to <code>CocipGrid.contrail_list</code> .                                                                                                            |
| <code>verbose_outputs_formation</code>           | Attach additional formation specific data to the output.                                                                                                                            |
| <code>verify_met</code>                          | Call <code>_verify_met()</code> on model instantiation.                                                                                                                             |
| <code>wind_shear_enhancement_exponent</code>     | Parameter denoted by $n$ in eq.                                                                                                                                                     |
| <code>wingspan</code>                            | Aircraft wingspan, [ $m$ ].                                                                                                                                                         |
| <code>fuel</code>                                | Fuel type                                                                                                                                                                           |

continues on next page



Table 7 – continued from previous page

|                                  |                                                                                                                        |
|----------------------------------|------------------------------------------------------------------------------------------------------------------------|
| <code>radius_threshold_um</code> | Radius threshold for regime bins, [ $\mu\text{m}$ ] This is the row index label for <code>habit_distributions</code> . |
| <code>habits</code>              | Particle habit (shape) types.                                                                                          |
| <code>habit_distributions</code> | Mix of ice particle habits in each radius regime.                                                                      |

**aircraft\_mass = None**

Nominal aircraft mass, [ $\text{kg}$ ]. If included in `CocipGrid.source`, this parameter is unused. Otherwise, if this parameter is `None`, the `aircraft_performance` model is used to estimate the aircraft mass.

**aircraft\_performance = None**

Aircraft performance model. Required unless `source` or `params` provide all of the following variables:

- `wingspan`
- `true_airspeed` (or `mach_number`)
- `fuel_flow`
- `engine_efficiency`
- `aircraft_mass`

If `None` and `CocipGrid.source` or `CocipGridParams` do not provide the above variables, a `ValueError` is raised. See `PSGrid` for an open-source implementation of a `AircraftPerformanceGrid` model.

**aircraft\_type = 'B737'**

ICAO code designating simulated aircraft type. Needed for the `aircraft_performance` and `Emissions` models.

**azimuth = 0.0**

Navigation bearing [ $\text{deg}$ ] measured in clockwise direction from true north, by default 0.0.

New in version 0.32.2.

EXPERIMENTAL: If `None`, run `CoCiP` in “segment-free” mode. This mode does not include any terms involving segments (`wind_shear`, `segment_length`, any derived terms), unless `dsn_dz_factor` is non-zero.

**dsn\_dz\_factor = 0.0**

Experimental parameter used to approximate `dsn_dz` from `ds_dz` via `dsn_dz = ds_dz * dsn_dz_factor`. A value of 0.0 disables any normal wind shear effects. An initial unpublished experiment suggests that `dsn_dz_factor = 0.665` adequately approximates the mean EF predictions of `CocipGrid` over all azimuths.

New in version 0.32.2.

**engine\_efficiency = None**

Nominal engine efficiency, [0 – 1]. If included in `CocipGrid.source`, this parameter is unused. Otherwise, if this parameter is `None`, the `aircraft_performance` model is used to estimate the engine efficiency.

**engine\_uid = None**

Engine unique identification number for the ICAO Aircraft Emissions Databank (EDB) If `None`, an assumed `engine_uid` is used in `Emissions`.

**fuel**

Fuel type

**fuel\_flow = None**

Nominal fuel flow, [ $kg\ s^{-1}$ ]. If included in `CocipGrid.source`, this parameter is unused. Otherwise, if this parameter is None, the `aircraft_performance` model is used to estimate the fuel flow.

**segment\_length = 1000.0**

Nominal segment length to place at each grid point [ $m$ ]. Round-off error can be problematic with a small nominal segment length and a large `dt_integration` parameter. On the other hand, too large of a nominal segment length diminishes the “locality” of the grid point.

New in version 0.32.2.

EXPERIMENTAL: If None, run CoCiP in “segment-free” mode. This mode does not include any terms involving segments (wind shear, segment length, any derived terms). See `azimuth` and `dsn_dz_factor` for more details.

**show\_progress = True**

Display tqdm progress bar showing batch evaluation progress.

**target\_split\_size = 100000**

Approximate size of a typical `numpy.ndarray` used with in CoCiP calculations. The 4-dimensional array defining the waypoint is raveled and split into batches of this size. A smaller number for this parameter will reduce memory footprint at the expense of a longer compute time.

**target\_split\_size\_pre\_SAC\_boost = 3.0**

Additional boost to target split size before SAC is computed. For typical meshes, only 10% of waypoints will survive SAC and initial downwash filtering. Accordingly, this parameter magnifies mesh split size before SAC is computed. See `target_split_size`.

**true\_airspeed = None**

Cruising true airspeed, [ $m\ s^{-1}$ ]. If included in `CocipGrid.source`, this parameter is unused. Otherwise, if this parameter is None, the `aircraft_performance` model is used to estimate the true airspeed.

**verbose\_outputs\_evolution = False**

Attach contrail evolution data to `CocipGrid.contrail_list`. Requires substantial memory overhead.

**verbose\_outputs\_formation = False**

Attach additional formation specific data to the output. If True, attach all possible formation data. See `pycontrails.models.cocipgrid.cocip_grid` for a list of supported formation data.

**wingspan = None**

Aircraft wingspan, [ $m$ ]. If included in `CocipGrid.source`, this parameter is unused. Otherwise, if this parameter is None, the `aircraft_performance` model is used to estimate the wingspan.

### 11.3.5 ACCF

This model is a this interface over the DLR / UMadrid `climaccf` package. See `ACCF` for more information.

|                                                         |                                                      |
|---------------------------------------------------------|------------------------------------------------------|
| <code>models.accf.ACCF(met[, surface, params])</code>   | Compute Algorithmic Climate Change Functions (ACCF). |
| <code>models.accf.ACCFParams([copy_source, ...])</code> | Default ACCF model parameters.                       |

**pycontrails.models.accf.ACCF**

**class** pycontrails.models.accf.ACCF(*met*, *surface=None*, *params=None*, *\*\*params\_kwargs*)

Bases: *Model*

Compute Algorithmic Climate Change Functions (ACCF).

This class is a wrapper over the DLR / UMadrid library *climaccf*, DOI: [10.5281/zenodo.6977272](https://doi.org/10.5281/zenodo.6977272)

**Parameters**

- **met** (*MetDataset*) – Dataset containing “air\_temperature” and “specific\_humidity” variables
- **surface** (*MetDataset*, *optional*) – Dataset containing “surface\_solar\_downward\_radiation” and “top\_net\_thermal\_radiation” variables

**References**

- [Dietmüller, 2022]
- [Dietmüller *et al.*, 2022]

**\_\_init\_\_**(*met*, *surface=None*, *params=None*, *\*\*params\_kwargs*)

**Methods**

|                                                         |                                                                             |
|---------------------------------------------------------|-----------------------------------------------------------------------------|
| <code>__init__(met[, surface, params])</code>           |                                                                             |
| <code>downselect_met()</code>                           | Downselect <i>met</i> domain to the max/min bounds of <i>source</i> .       |
| <code>eval([source])</code>                             | Evaluate accfs along flight trajectory or on meteorology grid.              |
| <code>get_source_param(key[, default, set_attr])</code> | Get source data with default set by parameter key.                          |
| <code>require_met()</code>                              | Ensure that <i>met</i> is a <i>MetDataset</i> .                             |
| <code>require_source_type(type_)</code>                 | Ensure that <i>source</i> is <i>type_</i> .                                 |
| <code>set_source([source])</code>                       | Attach original or copy of input <i>source</i> to <i>source</i> .           |
| <code>set_source_met([optional, variable])</code>       | Ensure or interpolate each required <i>met_variables</i> on <i>source</i> . |
| <code>transfer_met_source_attrs([source])</code>        | Transfer met source metadata from <i>met</i> to <i>source</i> .             |
| <code>update_params([params])</code>                    | Update model parameters on <i>params</i> .                                  |

## Attributes

|                                      |                                                                                      |
|--------------------------------------|--------------------------------------------------------------------------------------|
| <code>params</code>                  | Instantiated model parameters, in dictionary form                                    |
| <code>met</code>                     | Meteorology data                                                                     |
| <code>source</code>                  | Data evaluated in model                                                              |
| <code>hash</code>                    | Generate a unique hash for model instance.                                           |
| <code>interp_kwargs</code>           | Shortcut to create interpolation arguments from <code>params</code> .                |
| <code>long_name</code>               |                                                                                      |
| <code>met_required</code>            | Require meteorology is not None on <code>__init__()</code>                           |
| <code>met_variables</code>           | Required meteorology pressure level variables.                                       |
| <code>name</code>                    |                                                                                      |
| <code>path_lib</code>                |                                                                                      |
| <code>short_vars</code>              |                                                                                      |
| <code>sur_variables</code>           |                                                                                      |
| <code>processed_met_variables</code> | Set of required parameters if processing already complete on <code>met</code> input. |
| <code>optional_met_variables</code>  | Optional meteorology variables                                                       |

### default\_params

alias of `ACCFParams`

`eval(source=None, **params)`

Evaluate accfs along flight trajectory or on meteorology grid.

#### Parameters

- **source** (`GeoVectorDataset` | `Flight` | `MetDataset` | `None`, *optional*) – Input `GeoVectorDataset` or `Flight`. If `None`, evaluates at the `met` grid points.
- **\*\*params** (`Any`) – Overwrite model parameters before `eval`

#### Returns

`GeoVectorDataset` | `Flight` | `MetdataArray` – Returns `np.nan` if interpolating outside meteorology grid.

#### Raises

`NotImplementedError` – Raises if input source is not supported.

`long_name = 'algorithmic climate change functions'`

`met`

Meteorology data

```

met_variables = (MetVariable(short_name='t', standard_name='air_temperature',
long_name='Air Temperature', level_type='isobaricInhPa', ecmwf_id=130, grib1_id=11,
grib2_id=(0, 0, 0), units='K', amip='ta', description='Air temperature is the bulk
temperature of the air, not the surface (skin) temperature.'),
MetVariable(short_name='q', standard_name='specific_humidity', long_name='Specific
Humidity', level_type='isobaricInhPa', ecmwf_id=133, grib1_id=51, grib2_id=(0, 1,
0), units='kg kg**-1', amip='hus', description='Specific means per unit mass.
Specific humidity is the mass fraction of water vapor in (moist) air.'),
MetVariable(short_name='pv', standard_name='potential_vorticity',
long_name='Potential vorticity (K m^2 / kg s)', level_type='isobaricInhPa',
ecmwf_id=60, grib1_id=128, grib2_id=(0, 2, 14), units='K m**2 kg**-1 s**-1',
amip='pvu', description='Potential vorticity is a measure of the capacity for air to
rotate in the atmosphere.If we ignore the effects of heating and friction, potential
vorticity is conserved following an air parcel.It is used to look for places where
large wind storms are likely to originate and develop.Potential vorticity increases
strongly above the tropopause and therefore, it can also be used in studiesrelated
to the stratosphere and stratosphere-troposphere exchanges. Large wind storms
develop when a columnof air in the atmosphere starts to rotate. Potential vorticity
is calculated from the wind, temperature andpressure across a column of air in the
atmosphere.'), MetVariable(short_name='z', standard_name='geopotential',
long_name='Geopotential', level_type='isobaricInhPa', ecmwf_id=129, grib1_id=6,
grib2_id=(0, 3, 4), units='m**2 s**-2', amip=None, description='Geopotential is the
sum of the specific gravitational potential energy relative to the geoid and the
specific centripetal potential energy.'), MetVariable(short_name='r',
standard_name='relative_humidity', long_name='Relative Humidity',
level_type='isobaricInhPa', ecmwf_id=157, grib1_id=52, grib2_id=(0, 1, 1),
units='1', amip='hur', description='This parameter is the water vapour pressure as a
percentage of the value at which the air becomes saturated liquid.'),
MetVariable(short_name='v', standard_name='northward_wind', long_name='Northward
Wind', level_type='isobaricInhPa', ecmwf_id=132, grib1_id=34, grib2_id=(0, 2, 3),
units='m s**-1', amip='va', description='\"Northward\" indicates a vector component
which is positive when directed northward (negative southward). Wind is defined as a
two-dimensional (horizontal) air velocity vector, with no vertical component.'),
MetVariable(short_name='u', standard_name='eastward_wind', long_name='Eastward
Wind', level_type='isobaricInhPa', ecmwf_id=131, grib1_id=33, grib2_id=(0, 2, 2),
units='m s**-1', amip='ua', description='\"Eastward\" indicates a vector component
which is positive when directed eastward (negative westward). Wind is defined as a
two-dimensional (horizontal) air velocity vector, with no vertical component.'),
MetVariable(short_name='pv', standard_name='potential_vorticity',
long_name='Potential vorticity (K m^2 / kg s)', level_type='isobaricInhPa',
ecmwf_id=60, grib1_id=128, grib2_id=(0, 2, 14), units='K m**2 kg**-1 s**-1',
amip='pvu', description='Potential vorticity is a measure of the capacity for air to
rotate in the atmosphere.If we ignore the effects of heating and friction, potential
vorticity is conserved following an air parcel.It is used to look for places where
large wind storms are likely to originate and develop.Potential vorticity increases
strongly above the tropopause and therefore, it can also be used in studiesrelated
to the stratosphere and stratosphere-troposphere exchanges. Large wind storms
develop when a columnof air in the atmosphere starts to rotate. Potential vorticity
is calculated from the wind, temperature andpressure across a column of air in the
atmosphere.'))

```

Required meteorology pressure level variables. Each element in the list is a MetVariable or a tuple[MetVariable]. If element is a tuple[MetVariable], the variable depends on the data source. Only one variable in the tuple is required.

```
name = 'accr'
```

**params**

Instantiated model parameters, in dictionary form

```
path_lib = './'
```

```
short_vars = {'pv', 'q', 'r', 'ssrd', 't', 'ttr', 'u', 'v', 'z'}
```

**source**

Data evaluated in model

```
sur_variables = (MetVariable(short_name='ssrd',
standard_name='surface_solar_downward_radiation', long_name='Surface Solar Downward
Radiation', level_type='surface', ecmwf_id=169, grib1_id=None, grib2_id=(0, 4, 7),
units='J m**-2', amip=None, description='This parameter is the amount of solar
radiation (also known as shortwave radiation) that reaches a horizontal plane at the
surface of the Earth. This parameter comprises both direct and diffuse solar
radiation. '), MetVariable(short_name='ttr',
standard_name='top_net_thermal_radiation', long_name='Top of atmosphere net thermal
(longwave) radiation', level_type='nominalTop', ecmwf_id=179, grib1_id=None,
grib2_id=(0, 5, 5), units='J m**-2', amip=None, description='The thermal (also known
as terrestrial or longwave) radiation emitted to space at the top of the atmosphere
is commonly known as the Outgoing Longwave Radiation (OLR). The top net thermal
radiation (this parameter) is equal to the negative of OLR. See
https://www.ecmwf.int/sites/default/files/elibrary/2015/
18490-radiation-quantities-ecmwf-model-and-mars.pdf'))
```

**pycontrails.models.accf.ACCFParams**

```
class pycontrails.models.accf.ACCFParams(copy_source=True, interpolation_method='linear',
interpolation_bounds_error=False,
interpolation_fill_value=nan, interpolation_localize=False,
interpolation_use_indices=False,
interpolation_q_method=None, verify_met=True,
downselect_met=True, met_longitude_buffer=(0.0, 0.0),
met_latitude_buffer=(0.0, 0.0), met_level_buffer=(0.0, 0.0),
met_time_buffer=(numpy.timedelta64(0, 'h'),
numpy.timedelta64(0, 'h')), lat_bound=None,
lon_bound=None, efficacy=True, efficacy_option='lee_2021',
accf_v='V1.0', ch4_scaling=1.0, co2_scaling=1.0,
cont_scaling=1.0, h2o_scaling=1.0, o3_scaling=1.0,
forecast_step=6.0, sep_ri_rw=False, climate_indicator='ATR',
horizontal_resolution=0.5, emission_scenario='pulse',
time_horizon=20, pfca='PCFA-ISSR', merged=True,
issr_rhi_threshold=0.9, issr_temp_threshold=235,
sac_ei_h2o=1.25, sac_q=43000000.0, sac_eta=0.3,
nox_ei='TTV', PMO=False)
```

Bases: [ModelParams](#)

Default ACCF model parameters.

See [config-user.yml](#) definition at <https://github.com/dlr-pa/climaccf>

```

__init__(copy_source=True, interpolation_method='linear', interpolation_bounds_error=False,
         interpolation_fill_value=nan, interpolation_localize=False, interpolation_use_indices=False,
         interpolation_q_method=None, verify_met=True, downselect_met=True,
         met_longitude_buffer=(0.0, 0.0), met_latitude_buffer=(0.0, 0.0), met_level_buffer=(0.0, 0.0),
         met_time_buffer=(numpy.timedelta64(0, 'h'), numpy.timedelta64(0, 'h')), lat_bound=None,
         lon_bound=None, efficacy=True, efficacy_option='lee_2021', accf_v='V1.0', ch4_scaling=1.0,
         co2_scaling=1.0, cont_scaling=1.0, h2o_scaling=1.0, o3_scaling=1.0, forecast_step=6.0,
         sep_ri_rw=False, climate_indicator='ATR', horizontal_resolution=0.5,
         emission_scenario='pulse', time_horizon=20, pfca='PCFA-ISSR', merged=True,
         issr_rhi_threshold=0.9, issr_temp_threshold=235, sac_ei_h2o=1.25, sac_q=43000000.0,
         sac_eta=0.3, nox_ei='TTV', PMO=False)

```

## Methods

|                                           |                               |
|-------------------------------------------|-------------------------------|
| <code>__init__([copy_source, ...])</code> |                               |
| <code>as_dict()</code>                    | Convert object to dictionary. |

## Attributes

|                                         |                                                                 |
|-----------------------------------------|-----------------------------------------------------------------|
| <code>PMO</code>                        |                                                                 |
| <code>accf_v</code>                     |                                                                 |
| <code>ch4_scaling</code>                |                                                                 |
| <code>climate_indicator</code>          |                                                                 |
| <code>co2_scaling</code>                |                                                                 |
| <code>cont_scaling</code>               |                                                                 |
| <code>copy_source</code>                | Copy input source data on eval                                  |
| <code>downselect_met</code>             | Downselect input MetDataset` to region around source.           |
| <code>efficacy</code>                   |                                                                 |
| <code>efficacy_option</code>            |                                                                 |
| <code>emission_scenario</code>          |                                                                 |
| <code>forecast_step</code>              |                                                                 |
| <code>h2o_scaling</code>                |                                                                 |
| <code>horizontal_resolution</code>      |                                                                 |
| <code>interpolation_bounds_error</code> | If True, points lying outside interpolation will raise an error |

continues on next page

Table 8 – continued from previous page

|                                        |                                                                                                                          |
|----------------------------------------|--------------------------------------------------------------------------------------------------------------------------|
| <code>interpolation_fill_value</code>  | Used for outside interpolation value if <code>interpolation_bounds_error</code> is False                                 |
| <code>interpolation_localize</code>    | Experimental.                                                                                                            |
| <code>interpolation_method</code>      | Interpolation method.                                                                                                    |
| <code>interpolation_q_method</code>    | Experimental.                                                                                                            |
| <code>interpolation_use_indices</code> | Experimental.                                                                                                            |
| <code>issr_rhi_threshold</code>        | RHI Threshold                                                                                                            |
| <code>issr_temp_threshold</code>       |                                                                                                                          |
| <code>lat_bound</code>                 |                                                                                                                          |
| <code>lon_bound</code>                 |                                                                                                                          |
| <code>merged</code>                    |                                                                                                                          |
| <code>met_latitude_buffer</code>       | Met latitude buffer for input to <code>Flight.downselect_met()</code> , in WGS84 coordinates.                            |
| <code>met_level_buffer</code>          | Met level buffer for input to <code>Flight.downselect_met()</code> , in $[hPa]$ .                                        |
| <code>met_longitude_buffer</code>      | Met longitude buffer for input to <code>Flight.downselect_met()</code> , in WGS84 coordinates.                           |
| <code>met_time_buffer</code>           | Met time buffer for input to <code>Flight.downselect_met()</code> Only applies when <code>downselect_met</code> is True. |
| <code>nox_ei</code>                    |                                                                                                                          |
| <code>o3_scaling</code>                |                                                                                                                          |
| <code>pfca</code>                      |                                                                                                                          |
| <code>sac_ei_h2o</code>                |                                                                                                                          |
| <code>sac_eta</code>                   |                                                                                                                          |
| <code>sac_q</code>                     |                                                                                                                          |
| <code>sep_ri_rw</code>                 |                                                                                                                          |
| <code>time_horizon</code>              |                                                                                                                          |
| <code>verify_met</code>                | Call <code>_verify_met()</code> on model instantiation.                                                                  |

`PMO = False`

`accf_v = 'V1.0'`

`ch4_scaling = 1.0`

`climate_indicator = 'ATR'`

`co2_scaling = 1.0`

`cont_scaling = 1.0`



```

efficacy = True
efficacy_option = 'lee_2021'
emission_scenario = 'pulse'
forecast_step = 6.0
h2o_scaling = 1.0
horizontal_resolution = 0.5
issr_rhi_threshold = 0.9
    RHI Threshold
issr_temp_threshold = 235
lat_bound = None
lon_bound = None
merged = True
nox_ei = 'TTV'
o3_scaling = 1.0
pfca = 'PCFA-ISSR'
sac_ei_h2o = 1.25
sac_eta = 0.3
sac_q = 43000000.0
sep_ri_rw = False
time_horizon = 20

```

### 11.3.6 Aircraft Performance

|                                                                |                                                                        |
|----------------------------------------------------------------|------------------------------------------------------------------------|
| <code>core.aircraft_performance</code>                         | Abstract interfaces for aircraft performance models.                   |
| <code>models.ps_model.PSFlightParams(...)</code>               | Default parameters for PSFlight.                                       |
| <code>models.ps_model.PSFlight([met, params])</code>           | Simulate aircraft performance using Poll-Schumann (PS) model.          |
| <code>models.ps_model.PSGrid([met, params])</code>             | Compute nominal Poll-Schumann aircraft performance over a grid.        |
| <code>models.ps_model.PSAircraftEngineParams(...)</code>       | Store extracted aircraft and engine parameters for each aircraft type. |
| <code>models.ps_model.ps_nominal_grid(aircraft_type, *)</code> | Calculate the nominal performance grid for a given aircraft type.      |

## pycontrails.core.aircraft\_performance

Abstract interfaces for aircraft performance models.

### Module Attributes

|                                  |                                                      |
|----------------------------------|------------------------------------------------------|
| <code>DEFAULT_LOAD_FACTOR</code> | Default load factor for aircraft performance models. |
|----------------------------------|------------------------------------------------------|

### Classes

|                                                                |                                                                                |
|----------------------------------------------------------------|--------------------------------------------------------------------------------|
| <code>AircraftPerformance([met, params])</code>                | Support for standardizing aircraft performance methodologies.                  |
| <code>AircraftPerformanceData(fuel_flow, ...)</code>           | Store the computed aircraft performance metrics.                               |
| <code>AircraftPerformanceGrid([met, params])</code>            | Support for standardizing aircraft performance methodologies on a grid.        |
| <code>AircraftPerformanceGridData(fuel_flow, ...)</code>       | Store the computed aircraft performance metrics for nominal cruise conditions. |
| <code>AircraftPerformanceGridParams([copy_source, ...])</code> | Parameters for <code>AircraftPerformanceGrid</code> .                          |
| <code>AircraftPerformanceParams([copy_source, ...])</code>     | Parameters for <code>AircraftPerformance</code> .                              |

**class** `pycontrails.core.aircraft_performance.AircraftPerformance`(*met=None, params=None, \*\*params\_kwargs*)

Bases: `Model`

Support for standardizing aircraft performance methodologies.

This class provides a `simulate_fuel_and_performance()` method for iteratively calculating aircraft mass and fuel flow rate.

The implementing class must bring `eval()` and `calculate_aircraft_performance()` methods. At runtime, these methods are intended to be chained together as follows:

1. The `eval()` method is called with a `Flight`
2. The `simulate_fuel_and_performance()` method is called inside `eval()` to iteratively calculate aircraft mass and fuel flow rate. If an aircraft mass is provided, the fuel flow rate is calculated once directly with a single call to `calculate_aircraft_performance()`. If an aircraft mass is not provided, the fuel flow rate is calculated iteratively with multiple calls to `calculate_aircraft_performance()`.

**abstract** `calculate_aircraft_performance`(\**aircraft\_type, altitude\_ft, air\_temperature, time, true\_airspeed, aircraft\_mass, engine\_efficiency, fuel\_flow, thrust, q\_fuel, \*\*kwargs*)

Calculate aircraft performance along a trajectory.

When `time` is not `None`, this method should be used for a single flight trajectory. Waypoints are coupled via the `time` parameter.

This method computes the rate of climb and descent (ROCD) to determine flight phases: “cruise”, “climb”, and “descent”. Performance metrics depend on this phase.

When `time` is `None`, this method can be used to simulate flight performance over an arbitrary sequence of flight waypoints by assuming nominal flight characteristics. In this case, each point is treated independently and all points are assumed to be in a “cruise” phase of the flight.

### Parameters

- **aircraft\_type** (`str`) – Used to query the underlying model database for aircraft engine parameters.
- **altitude\_ft** (`npt.NDArray[np.float64]`) – Altitude at each waypoint, [*ft*]
- **air\_temperature** (`npt.NDArray[np.float64]`) – Ambient temperature for each waypoint, [*K*]
- **time** (`npt.NDArray[np.datetime64] | None`) – Waypoint time in `np.datetime64` format. If `None`, only drag force will be used in thrust calculations (ie, no vertical change and constant horizontal change). In addition, aircraft is assumed to be in cruise.
- **true\_airspeed** (`npt.NDArray[np.float64] | float | None`) – True airspeed for each waypoint, [ $ms^{-1}$ ]. If `None`, a nominal value is used.
- **aircraft\_mass** (`npt.NDArray[np.float64] | float`) – Aircraft mass for each waypoint, [*kg*].
- **engine\_efficiency** (`npt.NDArray[np.float64] | float | None`) – Override the engine efficiency at each waypoint.
- **fuel\_flow** (`npt.NDArray[np.float64] | float | None`) – Override the fuel flow at each waypoint, [ $kg s^{-1}$ ].
- **thrust** (`npt.NDArray[np.float64] | float | None`) – Override the thrust setting at each waypoint, [ $N$ ].
- **q\_fuel** (`float`) – Lower calorific value (LCV) of fuel, [ $J kg_{fuel}^{-1}$ ].
- **\*\*kwargs** (`Any`) – Additional keyword arguments to pass to the model.

### Returns

*AircraftPerformanceData* – Derived performance metrics at each waypoint.

#### `ensure_true_airspeed_on_source()`

Add `true_airspeed` field to *source* data if not already present.

### Returns

`npt.NDArray[np.float64]` – True airspeed, [ $ms^{-1}$ ]. If `true_airspeed` is already present on *source*, this is returned directly. Otherwise, it is calculated using `Flight.segment_true_airspeed()`.

#### `abstract eval(source=None, **params)`

Evaluate the aircraft performance model.

The implementing model adds the following fields to the source flight:

- `aircraft_mass`: aircraft mass at each waypoint, [*kg*]
- `fuel_flow`: fuel mass flow rate at each waypoint, [ $kg s^{-1}$ ]
- `thrust`: thrust at each waypoint, [*N*]
- `engine_efficiency`: engine efficiency at each waypoint
- `rocd`: rate of climb or descent at each waypoint, [ $ft min^{-1}$ ]
- `fuel_burn`: fuel burn at each waypoint, [*kg*]

In addition, the following attributes are added to the source flight:

- `n_engine`: number of engines
- `wingspan`: wingspan, [*m*]

- `max_mach`: maximum Mach number
- `max_altitude`: maximum altitude, [*m*]
- `total_fuel_burn`: total fuel burn, [*kg*]

#### Parameters

- `source` (*Flight*) – Flight trajectory to evaluate.
- `params` (*Any*) – Override `params` with keyword arguments.

#### Returns

*Flight* – Flight trajectory with aircraft performance data.

#### `met`

Meteorology data

#### `params`

Instantiated model parameters, in dictionary form

`simulate_fuel_and_performance`(\* *aircraft\_type*, *altitude\_ft*, *time*, *true\_airspeed*, *air\_temperature*, *aircraft\_mass*, *thrust*, *engine\_efficiency*, *fuel\_flow*, *q\_fuel*, *n\_iter*, *amass\_oew*, *amass\_mtow*, *amass\_mpl*, *load\_factor*, *takeoff\_mass*, \*\**kwargs*)

Calculate aircraft mass, fuel mass flow rate, and overall propulsion efficiency.

This method performs `n_iter` iterations, each of which calls `calculate_aircraft_performance()`. Each successive iteration generates a better estimate for mass fuel flow rate and aircraft mass at each waypoint.

#### Parameters

- `aircraft_type` (*str*) – Aircraft type designator used to query the underlying model database.
- `altitude_ft` (*npt.NDArray[np.float64]*) – Altitude at each waypoint, [*ft*]
- `time` (*npt.NDArray[np.datetime64]*) – Waypoint time in *np.datetime64* format.
- `true_airspeed` (*npt.NDArray[np.float64]*) – True airspeed for each waypoint, [*ms<sup>-1</sup>*]
- `air_temperature` (*npt.NDArray[np.float64]*) – Ambient temperature for each waypoint, [*K*]
- `aircraft_mass` (*npt.NDArray[np.float64] | float | None*) – Override the aircraft mass at each waypoint, [*kg*].
- `thrust` (*npt.NDArray[np.float64] | float | None*) – Override the thrust setting at each waypoint, [:math: *N*].
- `engine_efficiency` (*npt.NDArray[np.float64] | float | None*) – Override the engine efficiency at each waypoint.
- `fuel_flow` (*npt.NDArray[np.float64] | float | None*) – Override the fuel flow at each waypoint, [*kg<sup>s</sup><sup>-1</sup>*].
- `q_fuel` (*float*) – Lower calorific value (LCV) of fuel, [*J kg<sub>fuel</sub><sup>-1</sup>*].
- `amass_oew` (*float*) – Aircraft operating empty weight, [*kg*]. Used to determine the initial aircraft mass if `takeoff_mass` is not provided. This quantity is constant for a given aircraft type.

- **amass\_mtow** (`float`) – Aircraft maximum take-off weight, [*kg*]. Used to determine the initial aircraft mass if `takeoff_mass` is not provided. This quantity is constant for a given aircraft type.
- **amass\_mpl** (`float`) – Aircraft maximum payload, [*kg*]. Used to determine the initial aircraft mass if `takeoff_mass` is not provided. This quantity is constant for a given aircraft type.
- **load\_factor** (`float`) – Aircraft load factor assumption (between 0 and 1). If unknown, a value of 0.7 is a reasonable default. Typically, this parameter is between 0.6 and 0.8. During the height of the COVID-19 pandemic, this parameter was often much lower.
- **takeoff\_mass** (`float | None, optional`) – If known, the takeoff mass can be provided to skip the calculation in `jet.initial_aircraft_mass()`. In this case, the parameters `load_factor`, `amass_oeow`, `amass_mtow`, and `amass_mpl` are ignored.
- **\*\*kwargs** (`Any`) – Additional keyword arguments are passed to `calculate_aircraft_performance()`.

#### Returns

*AircraftPerformanceData* – Results from the final iteration is returned.

#### source

Data evaluated in model

```
class pycontrails.core.aircraft_performance.AircraftPerformanceData(fuel_flow, aircraft_mass,
                                                                    true_airspeed, fuel_burn,
                                                                    thrust, engine_efficiency,
                                                                    rocd)
```

Bases: `object`

Store the computed aircraft performance metrics.

#### Parameters

- **fuel\_flow** (`npt.NDArray[np.float64]`) – Fuel mass flow rate for each waypoint, [*kg* $s^{-1}$ ]
- **aircraft\_mass** (`npt.NDArray[np.float64]`) – Aircraft mass for each waypoint, [*kg*]
- **true\_airspeed** (`npt.NDArray[np.float64]`) – True airspeed at each waypoint, [ $m s^{-1}$ ]
- **fuel\_burn** (`npt.NDArray[np.float64]`) – Fuel consumption for each waypoint, [*kg*]. Set to an array of all nan values if it cannot be computed (ie, working with gridpoints).
- **thrust** (`npt.NDArray[np.float64]`) – Thrust force, [*N*]
- **engine\_efficiency** (`npt.NDArray[np.float64]`) – Overall propulsion efficiency for each waypoint
- **rocd** (`npt.NDArray[np.float64]`) – Rate of climb and descent, [*ft* $min^{-1}$ ]

`aircraft_mass`

`engine_efficiency`

`fuel_burn`

`fuel_flow`

`rocd`

**thrust**

**true\_airspeed**

**class** pycontrails.core.aircraft\_performance.**AircraftPerformanceGrid**(*met=None, params=None, \*\*params\_kwargs*)

Bases: *Model*

Support for standardizing aircraft performance methodologies on a grid.

Currently just a container until additional models are implemented.

**abstract eval**(*source=None, \*\*params*)

Evaluate the aircraft performance model.

**met**

Meteorology data

**params**

Instantiated model parameters, in dictionary form

**source**

Data evaluated in model

**class** pycontrails.core.aircraft\_performance.**AircraftPerformanceGridData**(*fuel\_flow, engine\_efficiency*)

Bases: *Generic[ArrayOrFloat]*

Store the computed aircraft performance metrics for nominal cruise conditions.

**engine\_efficiency**

Engine efficiency, [0 – 1]

**fuel\_flow**

Fuel mass flow rate, [ $kg\,s^{-1}$ ]

```

class pycontrails.core.aircraft_performance.AircraftPerformanceGridParams(copy_source=True,
                                                                           interpolation_method='linear',
                                                                           interpolation_bounds_error=False,
                                                                           interpolation_fill_value=nan,
                                                                           interpolation_localize=False,
                                                                           interpolation_use_indices=False,
                                                                           interpolation_q_method=None,
                                                                           verify_met=True,
                                                                           downselect_met=True,
                                                                           met_longitude_buffer=(0.0, 0.0),
                                                                           met_latitude_buffer=(0.0, 0.0),
                                                                           met_level_buffer=(0.0, 0.0),
                                                                           met_time_buffer=(numpy.timedelta64(
                                                                           'h'),
                                                                           numpy.timedelta64(0,
                                                                           'h')),
                                                                           fuel=<factory>,
                                                                           aircraft_type='B737',
                                                                           mach_number=None,
                                                                           aircraft_mass=None)

```

Bases: *ModelParams*

Parameters for *AircraftPerformanceGrid*.

**aircraft\_mass = None**

Aircraft mass, [*kg*] If *None*, a nominal value is determined by the implementation. Can be overridden by including an *aircraft\_mass* key in source data

**aircraft\_type = 'B737'**

ICAO code designating simulated aircraft type. Can be overridden by including *aircraft\_type* attribute in source data

**fuel**

Fuel type

**mach\_number = None**

Mach number, [*Ma*] If *None*, a nominal cruise value is determined by the implementation. Can be overridden by including a *mach\_number* key in source data

```
class pycontrails.core.aircraft_performance.AircraftPerformanceParams(copy_source=True,
                                                                    interpolation_method='linear',
                                                                    interpolation_bounds_error=False,
                                                                    interpolation_fill_value=nan,
                                                                    interpolation_localize=False,
                                                                    interpolation_use_indices=False,
                                                                    interpolation_q_method=None,
                                                                    verify_met=True,
                                                                    downselect_met=True,
                                                                    met_longitude_buffer=(0.0,
                                                                    0.0),
                                                                    met_latitude_buffer=(0.0,
                                                                    0.0),
                                                                    met_level_buffer=(0.0,
                                                                    0.0),
                                                                    met_time_buffer=(numpy.timedelta64(0,
                                                                    'h'),
                                                                    numpy.timedelta64(0,
                                                                    'h')),
                                                                    correct_fuel_flow=True,
                                                                    n_iter=3)
```

Bases: [ModelParams](#)

Parameters for [AircraftPerformance](#).

**correct\_fuel\_flow = True**

Whether to correct fuel flow to ensure it remains within the operational limits of the aircraft type.

**n\_iter = 3**

The number of iterations used to calculate aircraft mass and fuel flow. The default value of 3 is sufficient for most cases.

`pycontrails.core.aircraft_performance.DEFAULT_LOAD_FACTOR = 0.7`

Default load factor for aircraft performance models.

### **pycontrails.models.ps\_model.PSFlightParams**

```
class pycontrails.models.ps_model.PSFlightParams(copy_source=True, interpolation_method='linear',
                                                interpolation_bounds_error=False,
                                                interpolation_fill_value=nan,
                                                interpolation_localize=False,
                                                interpolation_use_indices=False,
                                                interpolation_q_method=None, verify_met=True,
                                                downselect_met=True, met_longitude_buffer=(0.0,
                                                0.0), met_latitude_buffer=(0.0, 0.0),
                                                met_level_buffer=(0.0, 0.0),
                                                met_time_buffer=(numpy.timedelta64(0, 'h'),
                                                numpy.timedelta64(0, 'h')), correct_fuel_flow=True,
                                                n_iter=3, eta_over_eta_b_min=0.5)
```



Bases: *AircraftPerformanceParams*

Default parameters for *PSFlight*.

```
__init__(copy_source=True, interpolation_method='linear', interpolation_bounds_error=False,
         interpolation_fill_value=nan, interpolation_localize=False, interpolation_use_indices=False,
         interpolation_q_method=None, verify_met=True, downselect_met=True,
         met_longitude_buffer=(0.0, 0.0), met_latitude_buffer=(0.0, 0.0), met_level_buffer=(0.0, 0.0),
         met_time_buffer=(numpy.timedelta64(0, 'h'), numpy.timedelta64(0, 'h')), correct_fuel_flow=True,
         n_iter=3, eta_over_eta_b_min=0.5)
```

## Methods

|                                           |                               |
|-------------------------------------------|-------------------------------|
| <code>__init__([copy_source, ...])</code> |                               |
| <code>as_dict()</code>                    | Convert object to dictionary. |

## Attributes

|                                         |                                                                                                                          |
|-----------------------------------------|--------------------------------------------------------------------------------------------------------------------------|
| <code>copy_source</code>                | Copy input source data on eval                                                                                           |
| <code>correct_fuel_flow</code>          | Whether to correct fuel flow to ensure it remains within the operational limits of the aircraft type.                    |
| <code>downselect_met</code>             | Downselect input <code>MetDataset`</code> to region around source.                                                       |
| <code>eta_over_eta_b_min</code>         | Clip the ratio of the overall propulsion efficiency to the maximum propulsion efficiency to always exceed this value.    |
| <code>interpolation_bounds_error</code> | If True, points lying outside interpolation will raise an error                                                          |
| <code>interpolation_fill_value</code>   | Used for outside interpolation value if <code>interpolation_bounds_error</code> is False                                 |
| <code>interpolation_localize</code>     | Experimental.                                                                                                            |
| <code>interpolation_method</code>       | Interpolation method.                                                                                                    |
| <code>interpolation_q_method</code>     | Experimental.                                                                                                            |
| <code>interpolation_use_indices</code>  | Experimental.                                                                                                            |
| <code>met_latitude_buffer</code>        | Met latitude buffer for input to <code>Flight.downselect_met()</code> , in WGS84 coordinates.                            |
| <code>met_level_buffer</code>           | Met level buffer for input to <code>Flight.downselect_met()</code> , in <code>[hPa]</code> .                             |
| <code>met_longitude_buffer</code>       | Met longitude buffer for input to <code>Flight.downselect_met()</code> , in WGS84 coordinates.                           |
| <code>met_time_buffer</code>            | Met time buffer for input to <code>Flight.downselect_met()</code> Only applies when <code>downselect_met</code> is True. |
| <code>n_iter</code>                     | The number of iterations used to calculate aircraft mass and fuel flow.                                                  |
| <code>verify_met</code>                 | Call <code>_verify_met()</code> on model instantiation.                                                                  |

`eta_over_eta_b_min = 0.5`

Clip the ratio of the overall propulsion efficiency to the maximum propulsion efficiency to always exceed this value.

### pycontrails.models.ps\_model.PSFlight

`class pycontrails.models.ps_model.PSFlight(met=None, params=None, **params_kwargs)`

Bases: *AircraftPerformance*

Simulate aircraft performance using Poll-Schumann (PS) model.

#### References

[Poll and Schumann, 2021] [Poll and Schumann, 2021]

Poll & Schumann (2022). An estimation method for the fuel burn and other performance characteristics of civil transport aircraft. Part 3 Generalisation to cover climb, descent and holding. *Aero. J.*, submitted.

`__init__`(*met=None, params=None, \*\*params\_kwargs*)

#### Methods

|                                                                           |                                                                                  |
|---------------------------------------------------------------------------|----------------------------------------------------------------------------------|
| <code>__init__</code> ([ <i>met, params</i> ])                            |                                                                                  |
| <code>calculate_aircraft_performance</code> (*, ...)                      | Calculate aircraft performance along a trajectory.                               |
| <code>check_aircraft_type_availability</code> ( <i>aircraft_type</i> )    | Check if aircraft type designator is available in the PS model database.         |
| <code>downselect_met</code> ()                                            | Downselect <i>met</i> domain to the max/min bounds of <i>source</i> .            |
| <code>ensure_true_airspeed_on_source</code> ()                            | Add <i>true_airspeed</i> field to <i>source</i> data if not already present.     |
| <code>eval</code> ([ <i>source</i> ])                                     | Evaluate the aircraft performance model.                                         |
| <code>get_source_param</code> ( <i>key</i> [, <i>default, set_attr</i> ]) | Get source data with default set by parameter key.                               |
| <code>require_met</code> ()                                               | Ensure that <i>met</i> is a MetDataset.                                          |
| <code>require_source_type</code> ( <i>type_</i> )                         | Ensure that <i>source</i> is <i>type_</i> .                                      |
| <code>set_source</code> ([ <i>source</i> ])                               | Attach original or copy of input <i>source</i> to <i>source</i> .                |
| <code>set_source_met</code> ([ <i>optional, variable</i> ])               | Ensure or interpolate each required <i>met_variables</i> on <i>source</i> .      |
| <code>simulate_fuel_and_performance</code> (*, ...)                       | Calculate aircraft mass, fuel mass flow rate, and overall propulsion efficiency. |
| <code>transfer_met_source_attrs</code> ([ <i>source</i> ])                | Transfer met source metadata from <i>met</i> to <i>source</i> .                  |
| <code>update_params</code> ([ <i>params</i> ])                            | Update model parameters on <i>params</i> .                                       |

## Attributes

|                                      |                                                                         |
|--------------------------------------|-------------------------------------------------------------------------|
| <code>params</code>                  | Instantiated model parameters, in dictionary form                       |
| <code>met</code>                     | Meteorology data                                                        |
| <code>source</code>                  | Data evaluated in model                                                 |
| <code>hash</code>                    | Generate a unique hash for model instance.                              |
| <code>interp_kwargs</code>           | Shortcut to create interpolation arguments from <code>params</code> .   |
| <code>long_name</code>               |                                                                         |
| <code>met_required</code>            | Require meteorology is not None on <code>__init__()</code>              |
| <code>met_variables</code>           | Required meteorology pressure level variables.                          |
| <code>name</code>                    |                                                                         |
| <code>optional_met_variables</code>  | Optional meteorology variables                                          |
| <code>aircraft_engine_params</code>  |                                                                         |
| <code>processed_met_variables</code> | Set of required parameters if processing already complete on met input. |

### aircraft\_engine\_params

**calculate\_aircraft\_performance**(\**, aircraft\_type, altitude\_ft, air\_temperature, time, true\_airspeed, aircraft\_mass, engine\_efficiency, fuel\_flow, thrust, q\_fuel, \*\*kwargs*)

Calculate aircraft performance along a trajectory.

When `time` is not None, this method should be used for a single flight trajectory. Waypoints are coupled via the `time` parameter.

This method computes the rate of climb and descent (ROCD) to determine flight phases: “cruise”, “climb”, and “descent”. Performance metrics depend on this phase.

When `time` is None, this method can be used to simulate flight performance over an arbitrary sequence of flight waypoints by assuming nominal flight characteristics. In this case, each point is treated independently and all points are assumed to be in a “cruise” phase of the flight.

#### Parameters

- **aircraft\_type** (`str`) – Used to query the underlying model database for aircraft engine parameters.
- **altitude\_ft** (`npt.NDArray[np.float64]`) – Altitude at each waypoint, [*ft*]
- **air\_temperature** (`npt.NDArray[np.float64]`) – Ambient temperature for each waypoint, [*K*]
- **time** (`npt.NDArray[np.datetime64] | None`) – Waypoint time in `np.datetime64` format. If None, only drag force will be used in thrust calculations (ie, no vertical change and constant horizontal change). In addition, aircraft is assumed to be in cruise.
- **true\_airspeed** (`npt.NDArray[np.float64] | float | None`) – True airspeed for each waypoint, [*ms<sup>-1</sup>*]. If None, a nominal value is used.
- **aircraft\_mass** (`npt.NDArray[np.float64] | float`) – Aircraft mass for each waypoint, [*kg*].
- **engine\_efficiency** (`npt.NDArray[np.float64] | float | None`) – Override the engine efficiency at each waypoint.

- **fuel\_flow** (`npt.NDArray[np.float64]` | `float` | `None`) – Override the fuel flow at each waypoint, [ $kg s^{-1}$ ].
- **thrust** (`npt.NDArray[np.float64]` | `float` | `None`) – Override the thrust setting at each waypoint, [ $N$ ].
- **q\_fuel** (`float`) – Lower calorific value (LCV) of fuel, [ $J kg_{fuel}^{-1}$ ].
- **\*\*kwargs** (Any) – Additional keyword arguments to pass to the model.

**Returns**

`AircraftPerformanceData` – Derived performance metrics at each waypoint.

**check\_aircraft\_type\_availability**(`aircraft_type`, `raise_error=True`)

Check if aircraft type designator is available in the PS model database.

**Parameters**

- **aircraft\_type** (`str`) – ICAO aircraft type designator
- **raise\_error** (`bool`, *optional*) – Optional flag for raising an error, by default `True`.

**Returns**

`bool` – Aircraft found in the PS model database.

**Raises**

**KeyError** – raises `KeyError` if the aircraft type is not covered by database

**default\_params**

alias of `PSFlightParams`

**eval**(`source=None`, **\*\*params**)

Evaluate the aircraft performance model.

The implementing model adds the following fields to the source flight:

- **aircraft\_mass**: aircraft mass at each waypoint, [ $kg$ ]
- **fuel\_flow**: fuel mass flow rate at each waypoint, [ $kg s^{-1}$ ]
- **thrust**: thrust at each waypoint, [ $N$ ]
- **engine\_efficiency**: engine efficiency at each waypoint
- **rocd**: rate of climb or descent at each waypoint, [ $ft min^{-1}$ ]
- **fuel\_burn**: fuel burn at each waypoint, [ $kg$ ]

In addition, the following attributes are added to the source flight:

- **n\_engine**: number of engines
- **wingspan**: wingspan, [ $m$ ]
- **max\_mach**: maximum Mach number
- **max\_altitude**: maximum altitude, [ $m$ ]
- **total\_fuel\_burn**: total fuel burn, [ $kg$ ]

**Parameters**

- **source** (`Flight`) – Flight trajectory to evaluate.
- **params** (Any) – Override `params` with keyword arguments.

**Returns**

*Flight* – Flight trajectory with aircraft performance data.

`long_name = 'Poll-Schumann Aircraft Performance Model'`

**met**

Meteorology data

```
met_variables = (MetVariable(short_name='t', standard_name='air_temperature',
long_name='Air Temperature', level_type='isobaricInhPa', ecmwf_id=130, grib1_id=11,
grib2_id=(0, 0, 0), units='K', amip='ta', description='Air temperature is the bulk
temperature of the air, not the surface (skin) temperature.'),)
```

Required meteorology pressure level variables. Each element in the list is a `MetVariable` or a `tuple[MetVariable]`. If element is a `tuple[MetVariable]`, the variable depends on the data source. Only one variable in the tuple is required.

`name = 'PSFlight'`

```
optional_met_variables = (MetVariable(short_name='u', standard_name='eastward_wind',
long_name='Eastward Wind', level_type='isobaricInhPa', ecmwf_id=131, grib1_id=33,
grib2_id=(0, 2, 2), units='m s**-1', amip='ua', description='"Eastward" indicates a
vector component which is positive when directed eastward (negative westward). Wind
is defined as a two-dimensional (horizontal) air velocity vector, with no vertical
component.'), MetVariable(short_name='v', standard_name='northward_wind',
long_name='Northward Wind', level_type='isobaricInhPa', ecmwf_id=132, grib1_id=34,
grib2_id=(0, 2, 3), units='m s**-1', amip='va', description='"Northward" indicates a
vector component which is positive when directed northward (negative southward).
Wind is defined as a two-dimensional (horizontal) air velocity vector, with no
vertical component.'))
```

Optional meteorology variables

**params**

Instantiated model parameters, in dictionary form

**source**

Data evaluated in model

**pycontrails.models.ps\_model.PSGrid**

```
class pycontrails.models.ps_model.PSGrid(met=None, params=None, **params_kwargs)
```

Bases: *AircraftPerformanceGrid*

Compute nominal Poll-Schumann aircraft performance over a grid.

For a given aircraft type, altitude, aircraft mass, air temperature, and mach number, the PS model computes a theoretical engine efficiency and fuel flow rate for an aircraft under cruise conditions. Letting the aircraft mass vary and fixing the other parameters, the engine efficiency curve attains a single maximum at a particular aircraft mass. By solving this implicit equation, the PS model can be used to compute the aircraft mass that maximizes engine efficiency for a given set of parameters. This is the “nominal” aircraft mass computed by this model.

This nominal aircraft mass is not always realizable. For example, the maximum engine efficiency may be attained at an aircraft mass that is less than the operating empty mass of the aircraft. This model determines the minimum and maximum possible aircraft mass for a given set of parameters using a simple heuristic. The nominal aircraft mass is then clipped to this range.

```
__init__(met=None, params=None, **params_kwargs)
```

## Methods

|                                                         |                                                                                         |
|---------------------------------------------------------|-----------------------------------------------------------------------------------------|
| <code>__init__([met, params])</code>                    |                                                                                         |
| <code>downselect_met()</code>                           | Downselect <i>met</i> domain to the max/min bounds of <i>source</i> .                   |
| <code>eval([source])</code>                             | Evaluate the PS model over a <code>MetDataset</code> or <code>GeoVectorDataset</code> . |
| <code>get_source_param(key[, default, set_attr])</code> | Get source data with default set by parameter key.                                      |
| <code>require_met()</code>                              | Ensure that <i>met</i> is a <code>MetDataset</code> .                                   |
| <code>require_source_type(type_)</code>                 | Ensure that <i>source</i> is <code>type_</code> .                                       |
| <code>set_source([source])</code>                       | Attach original or copy of input source to <i>source</i> .                              |
| <code>set_source_met([optional, variable])</code>       | Ensure or interpolate each required <i>met_variables</i> on <i>source</i> .             |
| <code>transfer_met_source_attrs([source])</code>        | Transfer met source metadata from <i>met</i> to <i>source</i> .                         |
| <code>update_params([params])</code>                    | Update model parameters on <i>params</i> .                                              |

## Attributes

|                                |                                                                                |
|--------------------------------|--------------------------------------------------------------------------------|
| <i>params</i>                  | Instantiated model parameters, in dictionary form                              |
| <i>met</i>                     | Meteorology data                                                               |
| <i>source</i>                  | Data evaluated in model                                                        |
| <i>hash</i>                    | Generate a unique hash for model instance.                                     |
| <i>interp_kwargs</i>           | Shortcut to create interpolation arguments from <i>params</i> .                |
| <i>long_name</i>               |                                                                                |
| <i>met_required</i>            | Require meteorology is not <code>None</code> on <code>__init__()</code>        |
| <i>met_variables</i>           | Required meteorology pressure level variables.                                 |
| <i>name</i>                    |                                                                                |
| <i>processed_met_variables</i> | Set of required parameters if processing already complete on <i>met</i> input. |
| <i>optional_met_variables</i>  | Optional meteorology variables                                                 |

### default\_params

alias of `PSGridParams`

`eval(source=None, **params)`

Evaluate the PS model over a `MetDataset` or `GeoVectorDataset`.

#### Parameters

- **source** (`GeoVectorDataset` | `MetDataset` | `None`, *optional*) – The source data to use for the evaluation. If `None`, the source is taken from the *met* attribute of the *PSGrid* instance. The aircraft type is taken from `source.attrs["aircraft_type"]`. If this field is not present, `params["aircraft_type"]` is used instead. See the static CSV file `ps-aircraft-params-20231117.csv` for a list of supported aircraft types.
- **\*\*params** (Any) – Override the default parameters of the *PSGrid* instance.

#### Returns

GeoVectorDataset | MetDataset –

The source data with the following variables added:

- aircraft\_mass
- fuel\_flow
- engine\_efficiency

#### Raises

**NotImplementedError** – If “true\_airspeed” or “aircraft\_mass” fields are included in *source*.

#### See also:

`ps_nominal_grid()`

`long_name = 'Poll-Schumann Aircraft Performance evaluated at arbitrary points'`

#### met

Meteorology data

```
met_variables = (MetVariable(short_name='t', standard_name='air_temperature',
long_name='Air Temperature', level_type='isobaricInhPa', ecmwf_id=130, grib1_id=11,
grib2_id=(0, 0, 0), units='K', amip='ta', description='Air temperature is the bulk
temperature of the air, not the surface (skin) temperature.'),)
```

Required meteorology pressure level variables. Each element in the list is a `MetVariable` or a `tuple[MetVariable]`. If element is a `tuple[MetVariable]`, the variable depends on the data source. Only one variable in the tuple is required.

`name = 'PSGrid'`

#### params

Instantiated model parameters, in dictionary form

#### source

Data evaluated in model

### pycontrails.models.ps\_model.PSAircraftEngineParams

```
class pycontrails.models.ps_model.PSAircraftEngineParams(manufacturer, aircraft_type, n_engine,
                                                         winglets, amass_mtow, amass_mlw,
                                                         amass_mzfw, amass_oew, amass_mpl,
                                                         wing_surface_area, wing_span,
                                                         fuselage_width, delta_2, cos_sweep,
                                                         wing_aspect_ratio, psi_0, x_ref,
                                                         wing_constant, j_1, j_2, j_3, c_l_do, f_00,
                                                         ff_max_sls, ff_idle_sls, m_des, c_t_des,
                                                         eta_1, eta_2, tr_ec, m_ec, tet_mto,
                                                         tet_mcc, nominal_opr, nominal_bpr,
                                                         nominal_fpr, fl_max, max_mach_num,
                                                         p_i_max, p_inf_co)
```

Bases: `object`

Store extracted aircraft and engine parameters for each aircraft type.

## AIRCRAFT INFORMATION

- `manufacturer` Aircraft manufacturer name
- `aircraft_type` Specific aircraft type variant
- `n_engine` Number of engines
- `winglets` Does the aircraft type contain winglets? (True/False)

## AIRCRAFT MASS PARAMETERS

- `amass_mtow` Aircraft maximum take-off weight, [*kg*]
- `amass_mlw` Aircraft maximum landing weight, [*kg*]
- `amass_mzfw` Aircraft maximum zero fuel weight, [*kg*]
- `amass_ow` Aircraft operating empty weight, [*kg*]
- `amass_mpl` Aircraft maximum payload, [*kg*]

## AIRCRAFT GEOMETRY

- `wing_surface_area` Reference wing surface area, [*m*<sup>2</sup>]
- `wing_span` Wing span, [*m*]
- `fuselage_width` Aircraft fuselage width, [*m*]
- `delta_2` Induced drag wing-fuselage interference factor
- `cos_sweep` Cosine of wing sweep angle measured at the 1/4 chord line
- `wing_aspect_ratio` Wing aspect ratio,  $\text{wing\_span}^2 / \text{wing\_surface\_area}$

## AERODYNAMIC PARAMETERS

- `psi_0` Aircraft geometry drag parameter
- `x_ref` **Threshold condition where the terminating shockwave moves onto the rear part of the wing**
- `wing_constant` **A constant used in the wave drag model, capturing the aerofoil technology factor and wing geometry**
- `j_1` Wave drag parameter 1
- `j_2` Wave drag parameter 2
- `j_3` Wave drag parameter 3
- `c_l_do` Design optimum lift coefficient



## ENGINE PARAMETERS

- **f\_00** Maximum thrust force that can be supplied by the engine at sea level static conditions, summed over all engines, [ $N$ ].
- **ff\_max\_sls** Fuel mass flow rate at take-off and sea level static conditions, summed over all engines, [ $kg s^{-1}$ ]
- **ff\_idle\_sls** Fuel mass flow rate under engine idle and sea level static conditions, summed over all engines, [ $kg s^{-1}$ ]
- **m\_des** Design optimum Mach number where the fuel mass flow rate is at a minimum.
- **c\_t\_des** Design optimum engine thrust coefficient where the fuel mass flow rate is at a minimum.
- **eta\_1** Multiplier for maximum overall propulsion efficiency model
- **eta\_2** Exponent for maximum overall propulsion efficiency model
- **tr\_ec** Engine characteristic ratio of total turbine-entry-temperature to the total freestream temperature for maximum overall efficiency.
- **m\_ec** Engine characteristic Mach number associated with *tr\_ec*.
- **tet\_mto** Turbine entry temperature at maximum take-off rating, [ $K$ ]
- **tet\_mcc** Turbine entry temperature at maximum continuous climb rating, [ $K$ ]
- **nominal\_opr** Nominal engine operating pressure ratio.
- **nominal\_bpr** Nominal engine bypass ratio.
- **nominal\_fpr** Nominal engine fan pressure ratio.

## HEIGHT AND SPEED LIMITS

- **fl\_max** Maximum flight level
  - **max\_mach\_num** Maximum operational Mach number
  - **p\_i\_max** Maximum operational impact pressure, [ $Pa$ ]
  - **p\_inf\_co** Crossover pressure altitude, [ $Pa$ ]
- \_\_init\_\_** (*manufacturer, aircraft\_type, n\_engine, winglets, amass\_mtow, amass\_mlw, amass\_mzfw, amass\_oew, amass\_mpl, wing\_surface\_area, wing\_span, fuselage\_width, delta\_2, cos\_sweep, wing\_aspect\_ratio, psi\_0, x\_ref, wing\_constant, j\_1, j\_2, j\_3, c\_l\_do, f\_00, ff\_max\_sls, ff\_idle\_sls, m\_des, c\_t\_des, eta\_1, eta\_2, tr\_ec, m\_ec, tet\_mto, tet\_mcc, nominal\_opr, nominal\_bpr, nominal\_fpr, fl\_max, max\_mach\_num, p\_i\_max, p\_inf\_co*)

## Methods

---

`__init__(manufacturer, aircraft_type, ...)`

---

## Attributes

---

`manufacturer`

`aircraft_type`

`n_engine`

`winglets`

`amass_mtow`

`amass_mlw`

`amass_mzfw`

`amass_oew`

`amass_mpl`

`wing_surface_area`

`wing_span`

`fuselage_width`

`delta_2`

`cos_sweep`

`wing_aspect_ratio`

`psi_0`

`x_ref`

`wing_constant`

`j_1`

`j_2`

`j_3`

---

continues on next page

Table 9 – continued from previous page

---

|                     |
|---------------------|
| <i>c_l_do</i>       |
| <i>f_00</i>         |
| <i>ff_max_sls</i>   |
| <i>ff_idle_sls</i>  |
| <i>m_des</i>        |
| <i>c_t_des</i>      |
| <i>eta_1</i>        |
| <i>eta_2</i>        |
| <i>tr_ec</i>        |
| <i>m_ec</i>         |
| <i>tet_mto</i>      |
| <i>tet_mcc</i>      |
| <i>nominal_opr</i>  |
| <i>nominal_bpr</i>  |
| <i>nominal_fpr</i>  |
| <i>fl_max</i>       |
| <i>max_mach_num</i> |
| <i>p_i_max</i>      |
| <i>p_inf_co</i>     |

---

**aircraft\_type**

**amass\_mlw**

**amass\_mpl**

**amass\_mtow**

**amass\_mzfw**

**amass\_ow**

**c\_l\_do**

c\_t\_des  
cos\_sweep  
delta\_2  
eta\_1  
eta\_2  
f\_00  
ff\_idle\_sls  
ff\_max\_sls  
fl\_max  
fuselage\_width  
j\_1  
j\_2  
j\_3  
m\_des  
m\_ec  
manufacturer  
max\_mach\_num  
n\_engine  
nominal\_bpr  
nominal\_fpr  
nominal\_opr  
p\_i\_max  
p\_inf\_co  
psi\_0  
tet\_mcc  
tet\_mto  
tr\_ec  
wing\_aspect\_ratio  
wing\_constant  
wing\_span  
wing\_surface\_area

winglets

x\_ref

### pycontrails.models.ps\_model.ps\_nominal\_grid

```
pycontrails.models.ps_model.ps_nominal_grid(aircraft_type, *, level=None, air_temperature=None,
                                             q_fuel=43130000.0, mach_number=None, maxiter=10)
```

Calculate the nominal performance grid for a given aircraft type.

This function is similar to the *PSGrid* model, but it doesn't require meteorological data. Instead, the ambient air temperature can be computed from the ISA model or passed as an argument.

#### Parameters

- **aircraft\_type** (`str`) – The aircraft type.
- **level** (`npt.NDArray[np.float64] | None, optional`) – The pressure level, [*hPa*]. If None, the `air_temperature` argument must be a `xarray.DataArray` with a level coordinate.
- **air\_temperature** (`xr.DataArray | npt.NDArray[np.float64] | None, optional`) – The ambient air temperature, [*K*]. If None (default), the ISA temperature is computed from the level argument. If a `xarray.DataArray`, the level coordinate must be present and the level argument must be None to avoid ambiguity. If a `numpy.ndarray` is passed, it is assumed to be 1 dimensional with the same shape as the level argument.
- **q\_fuel** (`float, optional`) – The fuel heating value, by default JetA.q\_fuel
- **mach\_number** (`float | None, optional`) – The Mach number. If None (default), the PS design Mach number is used.
- **maxiter** (`int, optional`) – Passed into `scipy.optimize.newton()`.

#### Returns

`xarray.Dataset` – The nominal performance grid. The grid is indexed by altitude and Mach number. Contains the following variables:

- "fuel\_flow" : Fuel flow rate, [*kg/s*]
- "engine\_efficiency" : Engine efficiency
- "aircraft\_mass" : Aircraft mass at which the engine efficiency is maximized, [*kg*]

#### Raises

**KeyError** – If “aircraft\_type” is not supported by the PS model.

#### Examples

```
>>> level = np.arange(200, 300, 10, dtype=float)
```

```
>>> # Compute nominal aircraft performance assuming ISA conditions
>>> # and the design Mach number
>>> perf = ps_nominal_grid("A320", level=level)
>>> perf.attrs["mach_number"]
0.753
```

```
>>> perf.to_dataframe()
      aircraft_mass  engine_efficiency  fuel_flow
level
200.0  58416.230844          0.308675  0.561244
210.0  61617.676623          0.308675  0.589307
220.0  64829.702583          0.308675  0.617369
230.0  68026.415693          0.308675  0.646423
240.0  71187.897058          0.308675  0.677265
250.0  71818.514829          0.308542  0.686129
260.0  71809.073819          0.308073  0.690896
270.0  71796.095265          0.307367  0.696978
280.0  71780.225852          0.306500  0.704144
290.0  71761.957365          0.305529  0.712217
```

```
>>> # Now compute it for a higher Mach number
>>> perf = ps_nominal_grid("A320", level=level, mach_number=0.78)
>>> perf.to_dataframe()
      aircraft_mass  engine_efficiency  fuel_flow
level
200.0  57857.463750          0.314462  0.580472
210.0  60626.062062          0.314467  0.605797
220.0  63818.498305          0.314467  0.634645
230.0  66993.691515          0.314467  0.664512
240.0  70129.930503          0.314467  0.696217
250.0  71747.933832          0.314423  0.714997
260.0  71735.433936          0.314098  0.721147
270.0  71719.057287          0.313542  0.728711
280.0  71699.595538          0.312830  0.737412
290.0  71677.628782          0.312016  0.747045
```

### 11.3.7 Emissions

|                                                        |                                                                                       |
|--------------------------------------------------------|---------------------------------------------------------------------------------------|
| <code>models.emissions.Emissions([met, params])</code> | Emissions handling using ICAO Emissions Databank (EDB) and black carbon correlations. |
| <code>models.emissions.black_carbon</code>             | Non-volatile particulate matter (nvPM) calculations.                                  |
| <code>models.emissions.ffm2</code>                     | Calculate nitrogen oxide (NOx), carbon monoxide (CO) and hydrocarbon (HC) emissions.  |

#### pycontrails.models.emissions.Emissions

**class** pycontrails.models.emissions.**Emissions**(*met=None, params=None, \*\*params\_kwargs*)

Bases: `Model`

Emissions handling using ICAO Emissions Databank (EDB) and black carbon correlations.

#### Parameters

- **met** (MetDataset | None, *optional*) – Met data, by default None.
- **params** (dict[str, Any] | None, *optional*) – Model parameters, by default None.
- **params\_kwargs** (Any) – Model parameters passed as keyword arguments.

## References

- [Lee *et al.*, 2021]
- [Schumann *et al.*, 2015]
- [Stettler *et al.*, 2013]
- [Wilkerson *et al.*, 2010]

## See also:

`pycontrails.models.emissions.black_carbon`, `pycontrails.models.emissions.ffm2`

`__init__` (*met=None*, *params=None*, *\*\*params\_kwargs*)

## Methods

|                                                                                   |                                                                             |
|-----------------------------------------------------------------------------------|-----------------------------------------------------------------------------|
| <code>__init__</code> ([ <i>met</i> , <i>params</i> ])                            |                                                                             |
| <code>downselect_met</code> ()                                                    | Downselect <i>met</i> domain to the max/min bounds of <i>source</i> .       |
| <code>eval</code> ([ <i>source</i> ])                                             | Calculate the emissions data for <i>source</i> .                            |
| <code>get_source_param</code> ( <i>key</i> [, <i>default</i> , <i>set_attr</i> ]) | Get source data with default set by parameter key.                          |
| <code>require_met</code> ()                                                       | Ensure that <i>met</i> is a MetDataset.                                     |
| <code>require_source_type</code> ( <i>type_</i> )                                 | Ensure that <i>source</i> is <i>type_</i> .                                 |
| <code>set_source</code> ([ <i>source</i> ])                                       | Attach original or copy of input <i>source</i> to <i>source</i> .           |
| <code>set_source_met</code> ([ <i>optional</i> , <i>variable</i> ])               | Ensure or interpolate each required <i>met_variables</i> on <i>source</i> . |
| <code>transfer_met_source_attrs</code> ([ <i>source</i> ])                        | Transfer met source metadata from <i>met</i> to <i>source</i> .             |
| <code>update_params</code> ([ <i>params</i> ])                                    | Update model parameters on <i>params</i> .                                  |

## Attributes

|                                |                                                                                |
|--------------------------------|--------------------------------------------------------------------------------|
| <i>params</i>                  | Instantiated model parameters, in dictionary form                              |
| <i>met</i>                     | Meteorology data                                                               |
| <i>source</i>                  | Data evaluated in model                                                        |
| <i>hash</i>                    | Generate a unique hash for model instance.                                     |
| <i>interp_kwargs</i>           | Shortcut to create interpolation arguments from <i>params</i> .                |
| <i>long_name</i>               |                                                                                |
| <i>met_required</i>            | Require meteorology is not None on <code>__init__</code> ()                    |
| <i>met_variables</i>           | Required meteorology pressure level variables.                                 |
| <i>name</i>                    |                                                                                |
| <i>processed_met_variables</i> | Set of required parameters if processing already complete on <i>met</i> input. |
| <i>optional_met_variables</i>  | Optional meteorology variables                                                 |

**default\_params**

alias of EmissionsParams

**eval**(*source=None, \*\*params*)

Calculate the emissions data for *source*.

**Parameter source must contain each of the variables:**

- `air_temperature`
- `specific_humidity`
- `true_airspeed`
- `fuel_flow`

If 'engine\_uid' is not provided in `source.attrs` or not available in the ICAO EDB, constant emission indices will be assumed for NO<sub>x</sub>, CO, HC, and nvPM mass and number.

The computed pollutants include carbon dioxide (CO<sub>2</sub>), nitrogen oxide (NO<sub>x</sub>), carbon monoxide (CO), hydrocarbons (HC), non-volatile particulate matter (nvPM) mass and number, sulphur oxides (SO<sub>x</sub>), sulphates (S) and organic carbon (OC).

Changed in version 0.47.0: Support GeoVectorDataset for the source parameter.

**Parameters**

- **source** (*GeoVectorDataset*) – Flight to evaluate
- **\*\*params** (Any) – Overwrite model parameters before eval

**Returns**

*GeoVectorDataset* – Flight with attached emissions data

`long_name = 'ICAO Emissions Databank (EDB)'`

**met**

Meteorology data

```
met_variables = (MetVariable(short_name='t', standard_name='air_temperature',
long_name='Air Temperature', level_type='isobaricInhPa', ecmwf_id=130, grib1_id=11,
grib2_id=(0, 0, 0), units='K', amip='ta', description='Air temperature is the bulk
temperature of the air, not the surface (skin) temperature. '),
MetVariable(short_name='q', standard_name='specific_humidity', long_name='Specific
Humidity', level_type='isobaricInhPa', ecmwf_id=133, grib1_id=51, grib2_id=(0, 1,
0), units='kg kg**-1', amip='hus', description='Specific means per unit mass.
Specific humidity is the mass fraction of water vapor in (moist) air. '))
```

Required meteorology pressure level variables. Each element in the list is a `MetVariable` or a `tuple[MetVariable]`. If element is a `tuple[MetVariable]`, the variable depends on the data source. Only one variable in the tuple is required.

`name = 'emissions'`

**params**

Instantiated model parameters, in dictionary form

**source**

Data evaluated in model



**pycontrails.models.emissions.black\_carbon**

Non-volatile particulate matter (nvPM) calculations.

**Functions**

|                                                              |                                                                                                 |
|--------------------------------------------------------------|-------------------------------------------------------------------------------------------------|
| <code>air_to_fuel_ratio_imfox(thrust_setting)</code>         | Calculate the air-to-fuel ratio at cruise conditions via Abrahamson's method.                   |
| <code>bc_mass_concentration_cruise_fox(c_bc_ref, ...)</code> | Calculate the black carbon mass concentration for cruise conditions ( <code>c_bc_cru</code> ).  |
| <code>bc_mass_concentration_fox(fuel_flow, t_fl, afr)</code> | Calculate the black carbon mass concentration for ground conditions ( <code>c_bc_ref</code> ).  |
| <code>bc_mass_concentration_imfox(...)</code>                | Calculate the BC mass concentration for ground and cruise conditions with ImFOX methodology.    |
| <code>bc_mass_emissions_index(c_bc, q_exhaust)</code>        | Calculate the black carbon mass emissions index.                                                |
| <code>doppelheuer_lecht_scaling_factor(t_fl_cru, ...)</code> | Estimate scaling factor to convert the reference BC mass concentration from ground to cruise.   |
| <code>exhaust_gas_volume_per_kg_fuel(afr)</code>             | Calculate the volume of exhaust gas per mass of fuel burnt.                                     |
| <code>flame_temperature(t_3)</code>                          | Calculate the flame temperature at the combustion chamber ( <code>t_fl</code> ).                |
| <code>geometric_mean_diameter_sac(air_pressure, ...)</code>  | Calculate the BC GMD for singular annular combustor (SAC) engines.                              |
| <code>mass_emissions_index_fox(air_pressure, ...)</code>     | Calculate the black carbon mass emissions index using the Formation and Oxidation Method (FOX). |
| <code>mass_emissions_index_imfox(...)</code>                 | Calculate the BC mass EI using the "Improved" Formation and Oxidation Method (ImFOX).           |
| <code>number_emissions_index_fractal_aggregates(...)</code>  | Estimate the black carbon number emission index using the fractal aggregates (FA) model.        |
| <code>nvpm_mass_ei_pct_reduction_due_to_saf(...)</code>      | Adjust nvPM mass emissions index to account for the effects of sustainable aviation fuels.      |
| <code>nvpm_number_ei_pct_reduction_due_to_saf(...)</code>    | Adjust nvPM number emissions index to account for the effects of sustainable aviation fuels.    |
| <code>turbine_inlet_temperature_imfox(afr)</code>            | Calculate the turbine inlet temperature using Abrahamson's method.                              |

`pycontrails.models.emissions.black_carbon.air_to_fuel_ratio_imfox(thrust_setting)`

Calculate the air-to-fuel ratio at cruise conditions via Abrahamson's method.

See Eq. (11) in [Abrahamson *et al.*, 2016].

**Parameters**

**thrust\_setting** (`npt.NDArray[np.float64]`) – Engine thrust setting, which is the fuel mass flow rate divided by the maximum fuel mass flow rate

**Returns**

`npt.NDArray[np.float64]` – Air-to-fuel ratio at cruise conditions

## References

- [Abrahamson *et al.*, 2016]

`pycontrails.models.emissions.black_carbon.bc_mass_concentration_cruise_fox`(*c\_bc\_ref*, *t\_fl\_cru*, *t\_fl\_ref*, *p\_3\_cru*, *p\_3\_ref*, *afr\_cru*, *afr\_ref*)

Calculate the black carbon mass concentration for cruise conditions (*c\_bc\_cru*).

This quantity is computed at the instrument sampling point without correcting for particle line losses.

### Parameters

- **c\_bc\_ref** (`npt.NDArray[np.float64]`) – Black carbon mass concentration at reference conditions, [ $mgm^{-3}$ ]
- **t\_fl\_cru** (`npt.NDArray[np.float64]`) – Flame temperature at cruise conditions, [ $K$ ]
- **t\_fl\_ref** (`npt.NDArray[np.float64] | float`) – Flame temperature at reference conditions, [ $K$ ]
- **p\_3\_cru** (`npt.NDArray[np.float64]`) – Combustor inlet pressure at cruise conditions, [ $Pa$ ]
- **p\_3\_ref** (`npt.NDArray[np.float64] | float`) – Combustor inlet pressure at reference conditions, [ $Pa$ ]
- **afr\_cru** (`npt.NDArray[np.float64]`) – Air-to-fuel ratio at cruise conditions
- **afr\_ref** (`npt.NDArray[np.float64] | float`) – Air-to-fuel ratio at reference conditions

### Returns

`npt.NDArray[np.float64]` – Black carbon mass concentration for cruise conditions, [ $mgm^{-3}$ ]

`pycontrails.models.emissions.black_carbon.bc_mass_concentration_fox`(*fuel\_flow*, *t\_fl*, *afr*)

Calculate the black carbon mass concentration for ground conditions (*c\_bc\_ref*).

This quantity is computed at the instrument sampling point without correcting for particle line losses.

### Parameters

- **fuel\_flow** (`npt.NDArray[np.float64]`) – Fuel mass flow rate, [ $kg s^{-1}$ ]
- **t\_fl** (`npt.NDArray[np.float64] | float`) – Flame temperature at the combustion chamber, [ $K$ ]
- **afr** (`npt.NDArray[np.float64] | float`) – Air-to-fuel ratio

### Returns

`npt.NDArray[np.float64]` – Black carbon mass concentration for ground conditions, [ $mgm^{-3}$ ]

`pycontrails.models.emissions.black_carbon.bc_mass_concentration_imfox`(*fuel\_flow\_per\_engine*, *afr*, *t\_4*, *fuel\_hydrogen*)

Calculate the BC mass concentration for ground and cruise conditions with ImFOX methodology.

This quantity is computed at the instrument sampling point without correcting for particle line losses.

### Parameters

- **fuel\_flow\_per\_engine** (`npt.NDArray[np.float64]`) – fuel mass flow rate per engine, [ $kg s^{-1}$ ]

- **afr** (`npt.NDArray[np.float64]`) – air-to-fuel ratio
- **t\_4** (`npt.NDArray[np.float64]`) – turbine inlet temperature, [ $K$ ]
- **fuel\_hydrogen** (`float`) – percentage of hydrogen mass content in the fuel (13.8% for conventional Jet A-1 fuel)

**Returns**

`npt.NDArray[np.float64]` – Black carbon mass concentration, [ $mgm^{-3}$ ]

`pycontrails.models.emissions.black_carbon.bc_mass_emissions_index(c_bc, q_exhaust)`

Calculate the black carbon mass emissions index.

**Parameters**

- **c\_bc** (`npt.NDArray[np.float64]`) – Black carbon mass concentration, [ $mgm^{-3}$ ]
- **q\_exhaust** (`npt.NDArray[np.float64]`) – Volume of exhaust gas per mass of fuel burnt, [ $m^3/kg_{fuel}$ ]

**Returns**

`npt.NDArray[np.float64]` – Black carbon mass emissions index, [ $mg/kg_{fuel}$ ]

**References**

- [Stettler *et al.*, 2013]

`pycontrails.models.emissions.black_carbon.doppelheuer_lecht_scaling_factor(t_fl_cru, t_fl_ref, p_3_cru, p_3_ref, afr_cru, afr_ref)`

Estimate scaling factor to convert the reference BC mass concentration from ground to cruise.

**Parameters**

- **t\_fl\_cru** (`npt.NDArray[np.float64]`) – Flame temperature at cruise conditions, [ $K$ ]
- **t\_fl\_ref** (`npt.NDArray[np.float64] | float`) – Flame temperature at reference conditions, [ $K$ ]
- **p\_3\_cru** (`npt.NDArray[np.float64]`) – Combustor inlet pressure at cruise conditions, [ $Pa$ ]
- **p\_3\_ref** (`npt.NDArray[np.float64] | float`) – Combustor inlet pressure at reference conditions, [ $Pa$ ]
- **afr\_cru** (`npt.NDArray[np.float64]`) – Air-to-fuel ratio at cruise conditions
- **afr\_ref** (`npt.NDArray[np.float64] | float`) – Air-to-fuel ratio at reference conditions

**Returns**

`npt.NDArray[np.float64]` – Doppelheuer & Lecht scaling factor

## References

- [Doppelheuer and Lecht, 1998]

`pycontrails.models.emissions.black_carbon.exhaust_gas_volume_per_kg_fuel(afr)`

Calculate the volume of exhaust gas per mass of fuel burnt.

### Parameters

`afr` (`npt.NDArray[np.float64]`) – Air-to-fuel ratio

### Returns

`npt.NDArray[np.float64]` – Volume of exhaust gas per mass of fuel burnt, [ $m^3/kg_{fuel}$ ]

## References

- [Stettler *et al.*, 2013]

`pycontrails.models.emissions.black_carbon.flame_temperature(t_3)`

Calculate the flame temperature at the combustion chamber (`t_fl`).

### Parameters

`t_3` (*ArrayScalarLike*) – Combustor inlet temperature, [ $K$ ]

### Returns

*ArrayScalarLike* – Flame temperature at the combustion chamber, [ $K$ ]

`pycontrails.models.emissions.black_carbon.geometric_mean_diameter_sac(air_pressure, air_temperature, true_airspeed, thrust_setting, pressure_ratio, q_fuel, *, comp_efficiency=0.9, delta_loss=5.75, cruise=True)`

Calculate the BC GMD for singular annular combustor (SAC) engines.

The BC (black carbon) GMD (geometric mean diameter) is estimated using the non-dimensionalized engine thrust setting, the ratio of turbine inlet to the compressor inlet temperature (`t4_t2`).

### Parameters

- `air_pressure` (`npt.NDArray[np.float64]`) – Pressure altitude at each waypoint, [ $Pa$ ]
- `air_temperature` (`npt.NDArray[np.float64]`) – Ambient temperature for each waypoint, [ $K$ ]
- `true_airspeed` (`npt.NDArray[np.float64]`) – True airspeed for each waypoint, [ $ms^{-1}$ ]
- `thrust_setting` (`npt.NDArray[np.float64]`) – Engine thrust setting, which is the fuel mass flow rate divided by the maximum fuel mass flow rate
- `pressure_ratio` (`float`) – Engine pressure ratio from the ICAO EDB
- `q_fuel` (`float`) – Lower calorific value (LCV) of fuel, [ $J kg_{fuel}^{-1}$ ]
- `comp_efficiency` (`float`) – Engine compressor efficiency (assumed to be 0.9)
- `delta_loss` (`float`) – Correction factor accounting for particle line losses (assumed to be 5.75 nm), [ $nm$ ]

- **cruise** (`bool`) – Set to true when the aircraft is not on the ground.

#### Returns

`npt.NDArray[np.float64]` – black carbon geometric mean diameter, [*nm*]

#### References

- [Teoh *et al.*, 2020]

```
pycontrails.models.emissions.black_carbon.mass_emissions_index_fox(air_pressure,
                                                                    air_temperature,
                                                                    true_airspeed,
                                                                    fuel_flow_per_engine,
                                                                    thrust_setting,
                                                                    pressure_ratio, *,
                                                                    comp_efficiency=0.9)
```

Calculate the black carbon mass emissions index using the Formation and Oxidation Method (FOX).

#### Parameters

- **air\_pressure** (`npt.NDArray[np.float64]`) – Pressure altitude at each waypoint, [*Pa*]
- **air\_temperature** (`npt.NDArray[np.float64]`) – Ambient temperature for each waypoint, [*K*]
- **true\_airspeed** (`npt.NDArray[np.float64]`) – True airspeed for each waypoint, [*m s<sup>-1</sup>*]
- **fuel\_flow\_per\_engine** (`npt.NDArray[np.float64]`) – Fuel mass flow rate per engine, [*kg s<sup>-1</sup>*]
- **thrust\_setting** (`npt.NDArray[np.float64]`) – Engine thrust setting, which is the fuel mass flow rate divided by the maximum fuel mass flow rate
- **pressure\_ratio** (`float`) – Engine pressure ratio from the ICAO EDB
- **comp\_efficiency** (`float`) – Engine compressor efficiency, assumed to be 0.9

#### Returns

`npt.NDArray[np.float64]` – Black carbon mass emissions index, [*mg kg<sub>fuel</sub><sup>-1</sup>*]

#### References

- [Stettler *et al.*, 2013]

```
pycontrails.models.emissions.black_carbon.mass_emissions_index_imfox(fuel_flow_per_engine,
                                                                        thrust_setting,
                                                                        fuel_hydrogen)
```

Calculate the BC mass EI using the “Improved” Formation and Oxidation Method (ImFOX).

#### Parameters

- **fuel\_flow\_per\_engine** (`npt.NDArray[np.float64]`) – Fuel mass flow rate per engine, [*kg s<sup>-1</sup>*]
- **thrust\_setting** (`npt.NDArray[np.float64]`) – Engine thrust setting, which is the fuel mass flow rate divided by the maximum fuel mass flow rate
- **fuel\_hydrogen** (`float`) – Percentage of hydrogen mass content in the fuel (13.8% for conventional Jet A-1 fuel)

**Returns**

`npt.NDArray[np.float64]` – Black carbon mass emissions index, [ $mg\ kg_{fuel}^{-1}$ ]

**References**

- [Abrahamson *et al.*, 2016]

`pycontrails.models.emissions.black_carbon.number_emissions_index_fractal_aggregates`(*nvpm\_ei\_m*,  
*gmd*,  
`*`,  
*gsd=1.8*,  
*rho\_bc=1770*,  
*k\_tem=1.621e-05*,  
*d\_tem=0.39*,  
*d\_fm=2.76*)

Estimate the black carbon number emission index using the fractal aggregates (FA) model.

The FA model estimates the number emissions index from the mass emissions index, particle size distribution, and morphology.

**Parameters**

- **nvpm\_ei\_m** (`npt.NDArray[np.float64]`) – Black carbon mass emissions index, [ $kg/kg_{fuel}$ ]
- **gmd** (`npt.NDArray[np.float64]`) – Black carbon geometric mean diameter, [ $m$ ]
- **gsd** (`float`) – Black carbon geometric standard deviation (assumed to be 1.80)
- **rho\_bc** (`float`) – Black carbon material density (1770  $kg/m^3$ ), [ $kgm^{-3}$ ]
- **k\_tem** (`float`) – Transmission electron microscopy prefactor coefficient (assumed to be  $1.621e-5$ )
- **d\_tem** (`float`) – Transmission electron microscopy exponent coefficient (assumed to be 0.39)
- **d\_fm** (`float`) – Mass-mobility exponent (assumed to be 2.76)

**Returns**

`npt.NDArray[np.float64]` – Black carbon number emissions index, [ $kg_{fuel}^{-1}$ ]

**References**

- FA model: [Teoh *et al.*, 2019]
- `gmd`, `gsd`, `d_fm`: [Teoh *et al.*, 2020]
- `rho_bc`: [Park *et al.*, 2004]
- `k_tem`, `d_tem`: [Dastanpour and Rogak, 2014]

`pycontrails.models.emissions.black_carbon.nvpm_mass_ei_pct_reduction_due_to_saf`(*hydrogen\_content*,  
*thrust\_setting*)

Adjust nvPM mass emissions index to account for the effects of sustainable aviation fuels.

For fuel with hydrogen mass content > 14.3, the adjustment factor is adopted from Teoh *et al.* (2022), which was used to calculate the change in nvPM EIn.

**Parameters**

- **hydrogen\_content** (`float`) – The percentage of hydrogen mass content in the fuel.
- **thrust\_setting** (`npt.NDArray[np.float64]`) – Engine thrust setting, where the equivalent fuel mass flow rate per engine at sea level,  $[0 - 1]$ .

**Returns**

`npt.NDArray[np.float64]` – Percentage reduction in nvPM number emissions index

**References**

- [Teoh *et al.*, 2022]
- [Brem *et al.*, 2015]

`pycontrails.models.emissions.black_carbon.nvpm_number_ei_pct_reduction_due_to_saf`(*hydrogen\_content*, *thrust\_setting*)

Adjust nvPM number emissions index to account for the effects of sustainable aviation fuels.

**Parameters**

- **hydrogen\_content** (`float`) – The percentage of hydrogen mass content in the fuel.
- **thrust\_setting** (`npt.NDArray[np.float64]`) – Engine thrust setting, where the equivalent fuel mass flow rate per engine at sea level,  $[0 - 1]$ .

**Returns**

`npt.NDArray[np.float64]` – Percentage reduction in nvPM number emissions index

**References**

- [Teoh *et al.*, 2022]
- [Brem *et al.*, 2015]

`pycontrails.models.emissions.black_carbon.turbine_inlet_temperature_imfox`(*afr*)

Calculate the turbine inlet temperature using Abrahamson’s method.

See Eq. (13) in [Abrahamson *et al.*, 2016].

**Parameters**

**afr** (`npt.NDArray[np.float64]`) – air-to-fuel ratio at cruise conditions

**Returns**

`npt.NDArray[np.float64]` – turbine inlet temperature,  $[K]$

**References**

- [Abrahamson *et al.*, 2016]

## pycontrails.models.emissions.ffm2

Calculate nitrogen oxide (NOx), carbon monoxide (CO) and hydrocarbon (HC) emissions.

This module applies the Fuel Flow Method 2 (FFM2) from DuBois & Paynter (2006) for a given aircraft-engine pair.

### References

- [DuBois and Paynter, 2006]

### Functions

|                                                             |                                                                                         |
|-------------------------------------------------------------|-----------------------------------------------------------------------------------------|
| <code>co_hc_emissions_index_profile(ff_idle, ...)</code>    | Create carbon monoxide (CO) and hydrocarbon (HC) emissions index (EI) profile.          |
| <code>ei_at_cruise(ei_sl, theta_amb, delta_amb, ...)</code> | Convert the estimated EI at sea level to cruise conditions.                             |
| <code>estimate_ei(log_ei_profile, ...)</code>               | Estimate carbon monoxide (CO) or hydrocarbon (HC) emissions index (EI).                 |
| <code>estimate_nox(log_ei_nox_profile, ..., ...)</code>     | Estimate the nitrogen oxide (NOx) emissions index (EI) at cruise conditions.            |
| <code>nitrogen_oxide_emissions_index_profile(...)</code>    | Create the nitrogen oxide (NOx) emissions index (EI) profile for the given engine type. |

`pycontrails.models.emissions.ffm2.co_hc_emissions_index_profile(ff_idle, ff_approach, ff_climb, ff_take_off, ei_idle, ei_approach, ei_climb, ei_take_off)`

Create carbon monoxide (CO) and hydrocarbon (HC) emissions index (EI) profile.

#### Parameters

- **ff\_idle** (`float`) – ICAO EDB fuel mass flow rate at idle conditions (7% power), [ $kg\ s^{-1}$ ]
- **ff\_approach** (`float`) – ICAO EDB fuel mass flow rate at approach (30% power), [ $kg\ s^{-1}$ ]
- **ff\_climb** (`float`) – ICAO EDB fuel mass flow rate at climb out (85% power), [ $kg\ s^{-1}$ ]
- **ff\_take\_off** (`float`) – ICAO EDB fuel mass flow rate at take-off (100% power), [ $kg\ s^{-1}$ ]
- **ei\_idle** (`float`) – ICAO EDB CO or HC emissions index at idle conditions (7% power), [ $g_{pollutant}/kg_{fuel}$ ]
- **ei\_approach** (`float`) – ICAO EDB CO or HC emissions index at approach (30% power), [ $g_{pollutant}/kg_{fuel}$ ]
- **ei\_climb** (`float`) – ICAO EDB CO or HC emissions index at climb out (85% power), [ $g_{pollutant}/kg_{fuel}$ ]
- **ei\_take\_off** (`float`) – ICAO EDB CO or HC emissions index at take-off (100% power), [ $g_{pollutant}/kg_{fuel}$ ]

#### Returns

`EmissionsProfileInterpolator` – log of CO or HC emissions index versus the log of fuel mass flow rate for a given engine type

`pycontrails.models.emissions.ffm2.ei_at_cruise(ei_sl, theta_amb, delta_amb, ei_type)`

Convert the estimated EI at sea level to cruise conditions.

Refer to Eqs. (15) and (16) in DuBois & Paynter (2006).



**Parameters**

- **ei\_sl** (npt.NDArray[np.float64]) – Sea level EI values.
- **theta\_amb** (npt.NDArray[np.float64]) – Ratio of the ambient temperature to the temperature at mean sea-level.
- **delta\_amb** (npt.NDArray[np.float64]) – Ratio of the pressure altitude to the surface pressure.
- **ei\_type** (str) – One of {“HC”, “CO”, “NOX”}

**Returns**

npt.NDArray[np.float64] – Estimated cruise EI values.

**References**

- [DuBois and Paynter, 2006]

pycontrails.models.emissions.ffm2.**estimate\_ei**(log\_ei\_profile, fuel\_flow\_per\_engine, true\_airspeed, air\_pressure, air\_temperature)

Estimate carbon monoxide (CO) or hydrocarbon (HC) emissions index (EI).

**Parameters**

- **log\_ei\_profile** (EmissionsProfileInterpolator) – emissions profile containing the log of EI CO or EI HC versus log of fuel flow.
- **fuel\_flow\_per\_engine** (npt.NDArray[np.float64]) – fuel mass flow rate per engine, [ $kg\,s^{-1}$ ]
- **true\_airspeed** (npt.NDArray[np.float64]) – true airspeed for each waypoint, [ $ms^{-1}$ ]
- **air\_pressure** (npt.NDArray[np.float64]) – pressure altitude at each waypoint, [ $Pa$ ]
- **air\_temperature** (npt.NDArray[np.float64]) – ambient temperature for each waypoint, [ $K$ ]

pycontrails.models.emissions.ffm2.**estimate\_nox**(log\_ei\_nox\_profile, fuel\_flow\_per\_engine, true\_airspeed, air\_pressure, air\_temperature, specific\_humidity=None)

Estimate the nitrogen oxide (NOx) emissions index (EI) at cruise conditions.

**Parameters**

- **log\_ei\_nox\_profile** (EmissionsProfileInterpolator) – emissions profile containing the log of EI NOx versus log of fuel flow.
- **fuel\_flow\_per\_engine** (npt.NDArray[np.float64]) – fuel mass flow rate per engine, [ $kg\,s^{-1}$ ]
- **true\_airspeed** (npt.NDArray[np.float64]) – true airspeed for each waypoint, [ $ms^{-1}$ ]
- **air\_pressure** (npt.NDArray[np.float64]) – pressure altitude at each waypoint, [ $Pa$ ]
- **air\_temperature** (npt.NDArray[np.float64]) – ambient temperature for each waypoint, [ $K$ ]
- **specific\_humidity** (npt.NDArray[np.float64] | None) – specific humidity for each waypoint, [ $kg_{H_2O}/kg_{air}$ ]

```
pycontrails.models.emissions.ffm2.nitrogen_oxide_emissions_index_profile(ff_idle, ff_approach,
                                                                           ff_climb, ff_take_off,
                                                                           ei_nox_idle,
                                                                           ei_nox_approach,
                                                                           ei_nox_climb,
                                                                           ei_nox_take_off)
```

Create the nitrogen oxide (NOx) emissions index (EI) profile for the given engine type.

**Parameters**

- **ff\_idle** (float) – ICAO EDB fuel mass flow rate at idle conditions (7% power), [ $kg\,s^{-1}$ ]
- **ff\_approach** (float) – ICAO EDB fuel mass flow rate at approach (30% power), [ $kg\,s^{-1}$ ]
- **ff\_climb** (float) – ICAO EDB fuel mass flow rate at climb out (85% power), [ $kg\,s^{-1}$ ]
- **ff\_take\_off** (float) – ICAO EDB fuel mass flow rate at take-off (100% power), [ $kg\,s^{-1}$ ]
- **ei\_nox\_idle** (float) – ICAO EDB NOx emissions index at idle conditions (7% power), [ $g_{NO_x}/kg_{fuel}$ ]
- **ei\_nox\_approach** (float) – ICAO EDB NOx emissions index at approach (30% power), [ $g_{NO_x}/kg_{fuel}$ ]
- **ei\_nox\_climb** (float) – ICAO EDB NOx emissions index at climb out (85% power), [ $g_{NO_x}/kg_{fuel}$ ]
- **ei\_nox\_take\_off** (float) – ICAO EDB NOx emissions index at take-off (100% power), [ $g_{NO_x}/kg_{fuel}$ ]

**Returns**

EmissionsProfileInterpolator – log of NOx emissions index versus the log of fuel mass flow rate for a given engine type

**Raises**

**ValueError** – If any EI nox values are non-positive.

### 11.3.8 Cirrus Optical Depth ( $\tau_{cirrus}$ )

|                                |                                   |
|--------------------------------|-----------------------------------|
| <code>models.tau_cirrus</code> | Calculate tau cirrus on Met data. |
|--------------------------------|-----------------------------------|

**pycontrails.models.tau\_cirrus**

Calculate tau cirrus on Met data.

**Functions**

|                                                            |                                                                                |
|------------------------------------------------------------|--------------------------------------------------------------------------------|
| <code>cirrus_effective_extinction_coef</code> (ciwc, T, p) | Calculate the effective extinction coefficient for spectral range 0.2-0.69 um. |
| <code>tau_cirrus</code> (met)                              | Calculate the optical depth of NWP cirrus around each pressure level.          |

`pycontrails.models.tau_cirrus.cirrus_effective_extinction_coef(ciwc, T, p)`

Calculate the effective extinction coefficient for spectral range 0.2-0.69  $\mu\text{m}$ .

#### Parameters

- **ciwc** (*ArrayLike*) – Cloud ice water content, [ $\text{kg}_{ice} \text{kg}_{dry\ air}^{-1}$ ]. Note that ECMWF provides specific ice water content per mass *moist* air.
- **T** (*ArrayLike*) – Air temperature, [ $K$ ]
- **p** (*ArrayLike*) – Air pressure, [ $\text{Pa}$ ]

#### Returns

*ArrayLike* – Effective extinction coefficient for spectral range 0.2-0.69  $\mu\text{m}$ , [ $\text{m}^{-1}$ ]

#### References

- [Schumann, 2012]
- [Sun and Rikus, 1999]

#### Notes

References as noted in [Schumann, 2012]:

- Sun and Rikus QJRMS (1999), 125, 3037-3055
- Sun QJRMS (2001), 127, 267-271
- McFarquhar QJRMS (2001), 127, 261-265

`pycontrails.models.tau_cirrus.tau_cirrus(met)`

Calculate the optical depth of NWP cirrus around each pressure level.

#### Parameters

**met** (*MetDataset*) – A *MetDataset* with the following variables: - “air\_temperature” - “specific\_cloud\_ice\_water\_content” or “ice\_water\_mixing\_ratio”

#### Returns

`xarray.DataArray` – Array of tau cirrus values. Has the same dimensions as the input data.

#### Notes

Implementation differs from original Fortran implementation in computing the vertical derivative of geopotential height. In particular, the finite difference at the top-most and bottom-most layers different from original calculation by a factor of two. The implementation here is consistent with a numerical approximation of the derivative.

## 11.3.9 Humidity Scaling

`models.humidity_scaling`

Humidity scaling methodologies.

### pycontrails.models.humidity\_scaling

Humidity scaling methodologies.

```
class pycontrails.models.humidity_scaling.ConstantHumidityScaling(met=None, params=None,
                                                                **params_kwargs)
```

Bases: *HumidityScaling*

Scale specific humidity by applying a constant uniform scaling.

This scalar simply applies the transformation..

$$\text{rhi} \rightarrow \text{rhi} / \text{rhi\_adj}$$

where `rhi_adj` is a constant specified by *params* or overridden by a variable or attribute on source in `eval()`.

The convention to divide by `rhi_adj` instead of considering the more natural product `rhi_adj * rhi` is somewhat arbitrary. In short, `rhi_adj` can be thought of as the critical threshold for supersaturation.

### References

- [Schumann, 2012]
- [Reutter *et al.*, 2020]

### default\_params

alias of *ConstantHumidityScalingParams*

```
formula = 'rhi -> rhi / rhi_adj'
```

```
long_name = 'Constant humidity scaling'
```

### met

Meteorology data

```
name = 'constant_scale'
```

### params

Instantiated model parameters, in dictionary form

```
scale(specific_humidity, air_temperature, air_pressure, **kwargs)
```

Compute scaled specific humidity and RH<sub>i</sub>.

See docstring for the implementing subclass for specific methodology.

### Parameters

- **specific\_humidity** (*ArrayLike*) – Unscaled specific relative humidity, [*kg kg<sup>-1</sup>*]. Typically, this is interpolated meteorology data.
- **air\_temperature** (*ArrayLike*) – Air temperature, [*K*]. Typically, this is interpolated meteorology data.
- **air\_pressure** (*ArrayLike*) – Pressure, [*Pa*]

- **kwargs** (*ArrayLike*) – Other keyword-only variables and model parameters used by the formula.

#### Returns

- **specific\_humidity** (*ArrayLike*) – Scaled specific humidity.
- **rhi** (*ArrayLike*) – Scaled relative humidity over ice.

#### See also:

`eval()`

`scaler_specific_keys = ('rhi_adj',)`

Variables required in addition to `specific_humidity`, `air_temperature`, and `air_pressure`. These are either `ModelParams` specific to scaling, or variables that should be extracted from `eval()` parameter source.

#### source

Data evaluated in model

```
class pycontrails.models.humidity_scaling.ConstantHumidityScalingParams(copy_source=True,
    interpolation_method='linear',
    interpolation_bounds_error=False,
    interpolation_fill_value=nan,
    interpolation_localize=False,
    interpolation_use_indices=False,
    interpolation_q_method=None,
    verify_met=True,
    downselect_met=True,
    met_longitude_buffer=(0.0,
    0.0),
    met_latitude_buffer=(0.0,
    0.0),
    met_level_buffer=(0.0,
    0.0),
    met_time_buffer=(numpy.timedelta64(0,
    'h'),
    numpy.timedelta64(0,
    'h')), rhi_adj=0.97)
```

Bases: *ModelParams*

Parameters for *ConstantHumidityScaling*.

**rhi\_adj = 0.97**

Scale specific humidity by dividing it with adjustment factor per [Schumann, 2012] eq. (9). Set to a constant 0.9 in [Schumann, 2012] to account for sub-scale variability of specific humidity. A value of 1.0 provides no scaling.

```
class pycontrails.models.humidity_scaling.ExponentialBoostHumidityScaling(met=None,
    params=None,
    **params_kwargs)
```

Bases: *HumidityScaling*

Scale humidity by composing constant scaling with exponential boosting.

This formula composes the transformations

1. constant scaling:  $rhi \rightarrow rhi / rhi\_adj$
2. exponential boosting:  $rhi \rightarrow rhi \wedge rhi\_boost\_exponent$  if  $rhi > 1$
3. clipping:  $rhi \rightarrow \min(rhi, clip\_upper)$

where `rhi_adj`, `rhi_boost_exponent`, and `clip_upper` are model *params*.

## References

- [Teoh *et al.*, 2022]

See also:

*ExponentialBoostLatitudeCorrectionHumidityScaling*

**default\_params**

alias of *ExponentialBoostHumidityScalingParams*

**formula** = 'rhi -> (rhi / rhi\_adj) ^ rhi\_boost\_exponent'

**long\_name** = 'Constant humidity scaling composed with exponential boosting'

**met**

Meteorology data

**name** = 'exponential\_boost'

**params**

Instantiated model parameters, in dictionary form

**scale**(*specific\_humidity*, *air\_temperature*, *air\_pressure*, *\*\*kwargs*)

Compute scaled specific humidity and RH<sub>i</sub>.

See docstring for the implementing subclass for specific methodology.

### Parameters

- **specific\_humidity** (*ArrayLike*) – Unscaled specific relative humidity, [ $kg\ kg^{-1}$ ]. Typically, this is interpolated meteorology data.
- **air\_temperature** (*ArrayLike*) – Air temperature, [ $K$ ]. Typically, this is interpolated meteorology data.
- **air\_pressure** (*ArrayLike*) – Pressure, [ $Pa$ ]
- **kwargs** (*ArrayLike*) – Other keyword-only variables and model parameters used by the formula.

### Returns

- **specific\_humidity** (*ArrayLike*) – Scaled specific humidity.
- **rhi** (*ArrayLike*) – Scaled relative humidity over ice.

See also:

`eval()`

**scaler\_specific\_keys = ('rhi\_adj', 'rhi\_boost\_exponent', 'clip\_upper')**

Variables required in addition to specific\_humidity, air\_temperature, and air\_pressure. These are either ModelParams specific to scaling, or variables that should be extracted from eval() parameter source.

**source**

Data evaluated in model

```
class pycontrails.models.humidity_scaling.ExponentialBoostHumidityScalingParams(copy_source=True,
                                                                              interpolation_method='linear',
                                                                              interpolation_bounds_error=False,
                                                                              interpolation_fill_value=nan,
                                                                              interpolation_localize=False,
                                                                              interpolation_use_indices=False,
                                                                              interpolation_q_method=None,
                                                                              verify_met=True,
                                                                              downselect_met=True,
                                                                              met_longitude_buffer=(0.0,
                                                                      0.0),
                                                                              met_latitude_buffer=(0.0,
                                                                      0.0),
                                                                              met_level_buffer=(0.0,
                                                                      0.0),
                                                                              met_time_buffer=(numpy.timedelta64(0,
                                                                              'h'),
                                                                      numpy.timedelta64(0,
                                                                      'h')),
                                                                              rhi_adj=0.97,
                                                                              rhi_boost_exponent=1.7,
                                                                              clip_upper=1.7)
```

Bases: *ConstantHumidityScalingParams*

Parameters for *ExponentialBoostHumidityScaling*.

**clip\_upper = 1.7**

Used to clip overinflated unrealistic RHi values.

**rhi\_boost\_exponent = 1.7**

Boost RHi values exceeding 1 as described in [Teoh *et al.*, 2022]. In eval(), this can be overridden by a keyword argument with the same name.

```
class pycontrails.models.humidity_scaling.ExponentialBoostLatitudeCorrectionHumidityScaling(met=None,
                                                                                          params=None,
                                                                                          **params_kwargs)
```

Bases: *HumidityScaling*

Correct RHi values derived from ECMWF ERA5 HRES.

Unlike other RHi correction factors, this function applies a custom latitude-based term and has been tuned for global application.

This formula composes the transformations

1. constant scaling:  $rhi \rightarrow rhi / rhi\_adj$
2. exponential boosting:  $rhi \rightarrow rhi \wedge rhi\_boost\_exponent$  if  $rhi > 1$
3. clipping:  $rhi \rightarrow \min(rhi, rhi\_max)$

where `rhi_adj` and `rhi_boost_exponent` depend on `latitude` to minimize error between ERA5 HRES and IAGOS in-situ data.

For each waypoint, `rhi_max` ensures that the corrected RHi does not exceed the maximum value according to thermodynamics:

- $rhi\_max = p\_liq(T) / p\_ice(T)$  for  $T > 235$  K, (Pruppacher and Klett, 1997)
- $rhi\_max = 1.67 + (1.45 - 1.67) * (T - 190.) / (235. - 190.)$  for  $T < 235$  K (Karcher and Lohmann, 2002; Tompkins et al., 2007)

The RHi correction addresses the known limitations of the ERA5 HRES humidity fields, ensuring that the ISSR coverage area and RHi-distribution is consistent with in-situ measurements from the IAGOS dataset. Generally, the correction:

1. reduces the ISSR coverage area near the equator,
2. increases the ISSR coverage area at higher latitudes, and
3. accounts for localized regions with very high ice supersaturation ( $RHi > 120\%$ ).

This methodology is an extension of Teoh et al. (2022) and has not yet been peer-reviewed/published.

The ERA5 HRES <> IAGOS fitting uses a sigmoid curve to capture significant changes in tropopause height at 20 - 50 degrees latitude.

The method `eval()` requires a `latitude` keyword argument.

## References

- [Teoh *et al.*, 2022]
- Kärcher, B. and Lohmann, U., 2002. A parameterization of cirrus cloud formation: Homogeneous freezing of supercooled aerosols. *Journal of Geophysical Research: Atmospheres*, 107(D2), pp.AAC-4.
- Pruppacher, H.R. and Klett, J.D. (1997) *Microphysics of Clouds and Precipitation*. 2nd Edition, Kluwer Academic, Dordrecht, 954 p.
- Tompkins, A.M., Gierens, K. and Rädcl, G., 2007. Ice supersaturation in the ECMWF integrated forecast system. *Quarterly Journal of the Royal Meteorological Society: A journal of the atmospheric sciences, applied meteorology and physical oceanography*, 133(622), pp.53-63.

See also:

[\*ExponentialBoostHumidityScaling\*](#)

**default\_params**

alias of *ModelParams*

**formula** = 'rhi -> (rhi / rhi\_adj) ^ rhi\_boost\_exponent'

**long\_name** = 'Latitude specific humidity scaling composed with exponential boosting'

**met**

Meteorology data



**name** = 'exponential\_boost\_latitude\_customization'

**params**

Instantiated model parameters, in dictionary form

**scale**(*specific\_humidity*, *air\_temperature*, *air\_pressure*, *\*\*kwargs*)

Compute scaled specific humidity and RHi.

See docstring for the implementing subclass for specific methodology.

**Parameters**

- **specific\_humidity** (*ArrayLike*) – Unscaled specific relative humidity, [ $kg\ kg^{-1}$ ]. Typically, this is interpolated meteorology data.
- **air\_temperature** (*ArrayLike*) – Air temperature, [ $K$ ]. Typically, this is interpolated meteorology data.
- **air\_pressure** (*ArrayLike*) – Pressure, [ $Pa$ ]
- **kwargs** (*ArrayLike*) – Other keyword-only variables and model parameters used by the formula.

**Returns**

- **specific\_humidity** (*ArrayLike*) – Scaled specific humidity.
- **rhi** (*ArrayLike*) – Scaled relative humidity over ice.

**See also:**

`eval()`

**scaler\_specific\_keys** = ('latitude',)

Variables required in addition to `specific_humidity`, `air_temperature`, and `air_pressure`. These are either `ModelParams` specific to scaling, or variables that should be extracted from `eval()` parameter source.

**source**

Data evaluated in model

**class** `pycontrails.models.humidity_scaling.HistogramMatching`(*met=None*, *params=None*, *\*\*params\_kwargs*)

Bases: `HumidityScaling`

Scale humidity by histogram matching to IAGOS RHi quantiles.

**default\_params**

alias of `HistogramMatchingParams`

**formula** = 'era5\_quantiles -> iagos\_quantiles'

**long\_name** = 'IAGOS RHi histogram matching'

**met**

Meteorology data

**name** = 'histogram\_matching'

**params**

Instantiated model parameters, in dictionary form

**scale**(*specific\_humidity*, *air\_temperature*, *air\_pressure*, *\*\*kwargs*)

Compute scaled specific humidity and RH<sub>i</sub>.

See docstring for the implementing subclass for specific methodology.

#### Parameters

- **specific\_humidity** (*ArrayLike*) – Unscaled specific relative humidity, [ $kg\ kg^{-1}$ ]. Typically, this is interpolated meteorology data.
- **air\_temperature** (*ArrayLike*) – Air temperature, [ $K$ ]. Typically, this is interpolated meteorology data.
- **air\_pressure** (*ArrayLike*) – Pressure, [ $Pa$ ]
- **kwargs** (*ArrayLike*) – Other keyword-only variables and model parameters used by the formula.

#### Returns

- **specific\_humidity** (*ArrayLike*) – Scaled specific humidity.
- **rhi** (*ArrayLike*) – Scaled relative humidity over ice.

#### See also:

`eval()`

#### source

Data evaluated in model

```
class pycontrails.models.humidity_scaling.HistogramMatchingParams(copy_source=True, interpolation_method='linear',  
    interpolation_bounds_error=False,  
    interpolation_fill_value=nan,  
    interpolation_localize=False,  
    interpolation_use_indices=False,  
    interpolation_q_method=None,  
    verify_met=True,  
    downselect_met=True,  
    met_longitude_buffer=(0.0, 0.0),  
    met_latitude_buffer=(0.0, 0.0), met_level_buffer=(0.0, 0.0),  
    met_time_buffer=(numpy.timedelta64(0, 'h'), numpy.timedelta64(0, 'h')),  
    product_type='reanalysis',  
    level_type='pressure',  
    member=None)
```

Bases: *ModelParams*

Parameters for *HistogramMatching*.

**level\_type = 'pressure'**

The ERA5 vertical level type. Must be one of "pressure" or "model".

**member = None**

The ERA5 ensemble member to use. Must be in the range [0, 10). Only used if `product_type` is "ensemble\_members".

**product\_type = 'reanalysis'**

The ERA5 product. Must be one of "reanalysis" or "ensemble\_members".

**class** pycontrails.models.humidity\_scaling.**HistogramMatchingWithEckel** (*met=None, params=None, \*\*params\_kwargs*)

Bases: *HumidityScaling*

Scale humidity by histogram matching to IAGOS RHi quantiles.

This method also applies the Eckel scaling to the recalibrated RHi values.

Unlike other specific humidity scaling methods, this method requires met data and performs interpolation at evaluation time.

**Warning:** Experimental. This may change or be removed in a future release.

## References

[Eckel and Walters, 1998]

**default\_params**

alias of *HistogramMatchingWithEckelParams*

**eval** (*source=None, \*\*params*)

Scale specific humidity by histogram matching to IAGOS RHi quantiles.

This method assumes `source` is equipped with the following variables:

- `air_temperature`
- `specific_humidity`: Humidity values for the `params["member"]` ERA5 ensemble member.

**formula = 'era5\_quantiles -> iagos\_quantiles -> recalibrated\_rhi'**

**long\_name = 'IAGOS RHi histogram matching with Eckel scaling'**

**met**

Meteorology data

**n\_members = 10**

**name = 'histogram\_matching\_with\_eckel'**

**params**

Instantiated model parameters, in dictionary form

**scale** (*specific\_humidity, air\_temperature, air\_pressure, \*\*kwargs*)

Scale specific humidity values via histogram matching and Eckel scaling.

Unlike the method on the base class, the method assumes each of the input arrays are `np.ndarray` and not `xr.DataArray` objects.

### Parameters

- **specific\_humidity** (`npt.NDArray[np.float64]`) – A 2D array of specific humidity values for all ERA5 ensemble members. The shape of this array must be  $(n, 10)$ , where  $n$  is the number of observations and  $10$  is the number of ERA5 ensemble members.
- **air\_temperature** (`npt.NDArray[np.float64]`) – A 1D array of air temperature values with shape  $(n,)$ .
- **air\_pressure** (`npt.NDArray[np.float64]`) – A 1D array of air pressure values with shape  $(n,)$ .
- **kwargs** (Any) – Unused, kept for compatibility with the base class.

#### Returns

- **specific\_humidity** (`npt.NDArray[np.float64]`) – The recalibrated specific humidity values. A 1D array with shape  $(n,)$ .
- **rhi** (`npt.NDArray[np.float64]`) – The recalibrated RH<sub>i</sub> values. A 1D array with shape  $(n,)$ .

#### source

Data evaluated in model

```
class pycontrails.models.humidity_scaling.HistogramMatchingWithEckelParams(copy_source=True,
interpolation_method='linear',
interpolation_bounds_error=False,
interpolation_fill_value=nan,
interpolation_localize=False,
interpolation_use_indices=False,
interpolation_q_method=None,
verify_met=True,
downselect_met=True,
met_longitude_buffer=(0.0,
0.0),
met_latitude_buffer=(0.0,
0.0),
met_level_buffer=(0.0,
0.0),
met_time_buffer=(numpy.timedelta64(
'h'),
numpy.timedelta64(
'h')), ensemble_specific_humidity=None,
member=None,
log_applied=False)
```

Bases: [ModelParams](#)

Parameters for [HistogramMatchingWithEckel](#).

**Warning:** Experimental. This may change or be removed in a future release.

**ensemble\_specific\_humidity = None**

A length-10 list of ERA5 ensemble members. Each element is a `MetdataArray` holding specific humidity values for a single ensemble member. If `None`, a `ValueError` will be raised at model instantiation time. The order of the list must be consistent with the order of the ERA5 ensemble members.

**log\_applied = False**

If a log transform has already been applied to each member of `ensemble_specific_humidity`, set this to `True`.

**member = None**

The specific member used. Must be in the range `[0, 10)`. If `None`, a `ValueError` will be raised at model instantiation time.

```
class pycontrails.models.humidity_scaling.HumidityScaling(met=None, params=None,
                                                         **params_kwargs)
```

Bases: `Model`

Support for standardizing humidity scaling methodologies.

The method `scale()` or `eval()` should be called immediately after interpolation over meteorology data.

New in version 0.27.0.

**property description**

Get description for instance.

**eval**(*source=None, \*\*params*)

Scale specific humidity values on `source`.

This method mutates the parameter `source` by modifying its “specific\_humidity” variable and by attaching an “rhi” variable. Set model parameter `copy_source=True` to avoid mutating `source`.

**Parameters**

- **source** (`GeoVectorDataset` | `MetDataset`) – Data with variables “specific\_humidity”, “air\_temperature”, and any variables defined by `scaler_specific_keys`.
- **\*\*params** (`Any`) – Overwrite model parameters before `eval`

**Returns**

`GeoVectorDataset` | `MetDataset` – Source data with updated “specific\_humidity” and “rhi”. If `source` is `GeoVectorDataset`, “air\_pressure” data is also attached.

**See also:**

`scale()`

**abstract property formula**

Serializable formula for humidity scaler.

**met**

Meteorology data

**params**

Instantiated model parameters, in dictionary form

**abstract scale**(*specific\_humidity*, *air\_temperature*, *air\_pressure*, **\*\*kwargs**)

Compute scaled specific humidity and RH<sub>i</sub>.

See docstring for the implementing subclass for specific methodology.

#### Parameters

- **specific\_humidity** (*ArrayLike*) – Unscaled specific relative humidity, [ $kg\ kg^{-1}$ ]. Typically, this is interpolated meteorology data.
- **air\_temperature** (*ArrayLike*) – Air temperature, [ $K$ ]. Typically, this is interpolated meteorology data.
- **air\_pressure** (*ArrayLike*) – Pressure, [ $Pa$ ]
- **kwargs** (*ArrayLike*) – Other keyword-only variables and model parameters used by the formula.

#### Returns

- **specific\_humidity** (*ArrayLike*) – Scaled specific humidity.
- **rhi** (*ArrayLike*) – Scaled relative humidity over ice.

See also:

*eval()*

**scaler\_specific\_keys** = ()

Variables required in addition to *specific\_humidity*, *air\_temperature*, and *air\_pressure* These are either *ModelParams* specific to scaling, or variables that should be extracted from *eval()* parameter source.

#### source

Data evaluated in model

#### property to\_json

Get description for instance.

**class** pycontrails.models.humidity\_scaling.**HumidityScalingByLevel**(*met=None*, *params=None*, **\*\*params\_kwargs**)

Bases: *HumidityScaling*

Apply custom scaling to *specific\_humidity* by pressure level.

This implements the original humidity scaling scheme suggested in [Schumann, 2012]. In particular, see eq. (9) and the surrounding text, quoted below.

Hence, the critical value RH<sub>ic</sub> is usually taken different and below 100% in NWP models. In the ECMWF model, this value is..

$$RH_{ic} = 0.8, \quad (9)$$

in the mid-troposphere, 1.0 in the stratosphere and follows a smooth transition with pressure altitude between these two values in the upper 20 % of the troposphere. For simplicity of further analysis, we divide the input value of *q* by RH<sub>ic</sub> initially.

See *ConstantHumidityScaling* for the simple method described above.

The diagram below shows the piecewise-linear *rhi\_adj* factor by level. In particular, *rhi\_adj* is constant at the stratosphere and above, linearly changes from the mid-troposphere to the stratosphere, and is constant at the mid-troposphere and below.

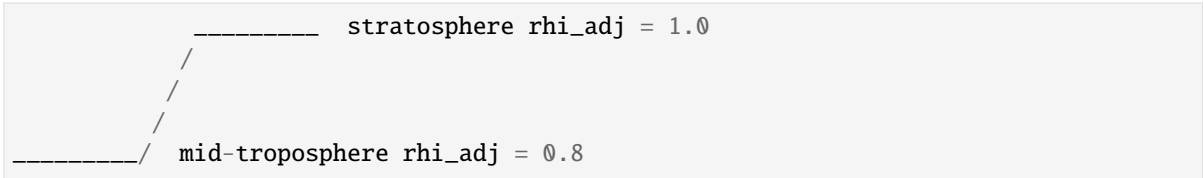

## References

- [Schumann, 2012]

### default\_params

alias of *HumidityScalingByLevelParams*

**formula** = 'rhi -> rhi / rhi\_adj'

**long\_name** = 'Constant humidity scaling by level'

### met

Meteorology data

**name** = 'constant\_scale\_by\_level'

### params

Instantiated model parameters, in dictionary form

**scale**(*specific\_humidity*, *air\_temperature*, *air\_pressure*, **\*\*kwargs**)

Compute scaled specific humidity and RH<sub>i</sub>.

See docstring for the implementing subclass for specific methodology.

### Parameters

- **specific\_humidity** (*ArrayLike*) – Unscaled specific relative humidity, [ $kg\ kg^{-1}$ ]. Typically, this is interpolated meteorology data.
- **air\_temperature** (*ArrayLike*) – Air temperature, [ $K$ ]. Typically, this is interpolated meteorology data.
- **air\_pressure** (*ArrayLike*) – Pressure, [ $Pa$ ]
- **kwargs** (*ArrayLike*) – Other keyword-only variables and model parameters used by the formula.

### Returns

- **specific\_humidity** (*ArrayLike*) – Scaled specific humidity.
- **rhi** (*ArrayLike*) – Scaled relative humidity over ice.

### See also:

`eval()`

**scaler\_specific\_keys** = ('rhi\_adj\_mid\_troposphere', 'rhi\_adj\_stratosphere', 'mid\_troposphere\_threshold', 'stratosphere\_threshold')

Variables required in addition to *specific\_humidity*, *air\_temperature*, and *air\_pressure* These are either `ModelParams` specific to scaling, or variables that should be extracted from `eval()` parameter source.

**source**

Data evaluated in model

```
class pycontrails.models.humidity_scaling.HumidityScalingByLevelParams(copy_source=True,  
                                                                    interpolation_method='linear',  
                                                                    interpolation_bounds_error=False,  
                                                                    interpolation_fill_value=nan,  
                                                                    interpolation_localize=False,  
                                                                    interpolation_use_indices=False,  
                                                                    interpolation_q_method=None,  
                                                                    verify_met=True,  
                                                                    downselect_met=True,  
                                                                    met_longitude_buffer=(0.0,  
                                                                    0.0),  
                                                                    met_latitude_buffer=(0.0,  
                                                                    0.0),  
                                                                    met_level_buffer=(0.0,  
                                                                    0.0),  
                                                                    met_time_buffer=(numpy.timedelta64(0,  
                                                                    'h'),  
                                                                    numpy.timedelta64(0,  
                                                                    'h')),  
                                                                    rhi_adj_mid_troposphere=0.8,  
                                                                    rhi_adj_stratosphere=1.0,  
                                                                    mid_troposphere_threshold=0.8,  
                                                                    stratosphere_threshold=1.0)
```

Bases: *ModelParams*Parameters for *HumidityScalingByLevel*.**mid\_troposphere\_threshold = 0.8**

Adjustment factor for mid-troposphere humidity scaling. Default value of 0.8 taken from [Schumann, 2012].

**rhi\_adj\_mid\_troposphere = 0.8**

Fraction of troposphere for mid-troposphere humidity scaling. Default value suggested in [Schumann, 2012].

**rhi\_adj\_stratosphere = 1.0**

Fraction of troposphere for stratosphere humidity scaling. Default value suggested in [Schumann, 2012].

**stratosphere\_threshold = 1.0**

Adjustment factor for stratosphere humidity scaling. Default value of 1.0 taken from [Schumann, 2012].

```
pycontrails.models.humidity_scaling.eckel_scaling(ensemble_mean_rhi, ensemble_member_rhi,  
                                                  q_method)
```

Apply Eckel scaling to the given RHi values.

**Parameters**



- **ensemble\_mean\_rhi** (`npt.NDArray[np.float64]`) – The ensemble mean RHi values. This should be a 1D array with the same shape as `ensemble_member_rhi`.
- **ensemble\_member\_rhi** (`npt.NDArray[np.float64]`) – The RHi values for a single ensemble member.
- **q\_method** (`{None, "cubic-spline", "log-q-log-p"}`) – The interpolation method.

**Returns**

`npt.NDArray[np.float64]` – The scaled RHi values. Values are manually clipped at 0 to ensure only non-negative values are returned.

**References**

[Eckel and Walters, 1998]

`pycontrails.models.humidity_scaling.histogram_matching(era5_rhi, product_type, level_type, member, q_method)`

Map ERA5-derived RHi to its corresponding IAGOS quantile via histogram matching.

This matching is performed on a **single** ERA5 ensemble member.

**Parameters**

- **era5\_rhi** (*ArrayLike*) – ERA5-derived RHi values for the given ensemble member.
- **product\_type** (`{"reanalysis", "ensemble_members"}`) – The ERA5 product type.
- **level\_type** (`{"pressure", "model"}`) – Select whether to perform quantile mapping based on quantiles from pressure- or model-level ERA5 data. Selecting `level_type == "model"` when `product_type == "ensemble_members"` will produce a warning and change `product_type` to "reanalysis".
- **member** (`int | None`) – The ERA5 ensemble member to use. Must be in the range `[0, 10)`. Only used if `product_type == "ensemble_members"`.
- **q\_method** (`{None, "cubic-spline", "log-q-log-p"}`) – The interpolation method.

**Returns**

`npt.NDArray[np.float64]` – The IAGOS quantiles corresponding to the ERA5-derived RHi values. Returned as a numpy array with the same shape and dtype as `era5_rhi`.

`pycontrails.models.humidity_scaling.histogram_matching_all_members(era5_rhi_all_members, member, q_method)`

Recalibrate ERA5-derived RHi values to IAGOS quantiles by histogram matching.

This recalibration requires values for **all** ERA5 ensemble members. Currently, the number of ensemble members is hard-coded to 10.

**Parameters**

- **era5\_rhi\_all\_members** (`npt.NDArray[np.float64]`) – ERA5-derived RHi values for all ensemble members. This array should have shape `(n, 10)`.
- **member** (`int`) – The ERA5 ensemble member to use. Must be in the range `[0, 10)`.
- **q\_method** (`{None, "cubic-spline", "log-q-log-p"}`) – The interpolation method.

**Returns**

- **ensemble\_mean\_rhi** (`npt.NDArray[np.float64]`) – The mean RHi values after histogram matching over all ensemble members. This is an array of shape `(n,)`.

- **ensemble\_member\_rhi** (`npt.NDArray[np.float64]`) – The RHi values after histogram matching for the given ensemble member. This is an array of shape `(n,)`.

## 11.4 Physics

|                                |                                                                    |
|--------------------------------|--------------------------------------------------------------------|
| <code>physics.constants</code> | Meteorological, thermophysical, and aircraft constants.            |
| <code>physics.thermo</code>    | Thermodynamic relationships.                                       |
| <code>physics.jet</code>       | Jet aircraft trajectory and performance parameters.                |
| <code>physics.geo</code>       | Tools for spherical geometry, solar radiation, and wind advection. |
| <code>physics.units</code>     | Unit conversion support.                                           |

### 11.4.1 `pycontrails.physics.constants`

Meteorological, thermophysical, and aircraft constants.

## Module Attributes

|                                 |                                                                                                                                    |
|---------------------------------|------------------------------------------------------------------------------------------------------------------------------------|
| <code>absolute_zero</code>      | Absolute zero value [ $C$ ]                                                                                                        |
| <code>g</code>                  | Gravitational acceleration [ $m\ s^{-2}$ ]                                                                                         |
| <code>radius_earth</code>       | Radius of Earth [ $m$ ]                                                                                                            |
| <code>surface_area_earth</code> | Surface area of Earth [ $m^2$ ]                                                                                                    |
| <code>h_tropopause</code>       | ISA height of the tropopause [ $m$ ] [ <a href="#">Wikipedia contributors, 2023</a> ]                                              |
| <code>seconds_per_year</code>   | Seconds in a Julian year [ $s$ ]                                                                                                   |
| <code>p_surface</code>          | Surface pressure, international standard atmosphere [ $Pa$ ] [ <a href="#">Wikipedia contributors, 2023</a> ]                      |
| <code>c_pd</code>               | Isobaric heat capacity of dry air [ $J\ kg^{-1}\ K^{-1}$ ]                                                                         |
| <code>c_pv</code>               | Isobaric heat capacity of water vapor [ $J\ kg^{-1}\ K^{-1}$ ]                                                                     |
| <code>M_d</code>                | Molar mass of dry air [ $kg\ mol^{-1}$ ]                                                                                           |
| <code>M_v</code>                | Molar mass of water [ $kg\ mol^{-1}$ ]                                                                                             |
| <code>gamma</code>              | which heat capacities?                                                                                                             |
| <code>R</code>                  | molar gas constant [ $J\ mol^{-1}\ K^{-1}$ ]                                                                                       |
| <code>R_d</code>                | Gas constant of dry air [ $J\ kg^{-1}\ K^{-1}$ ]                                                                                   |
| <code>R_v</code>                | Gas constant of water vapour [ $J\ kg^{-1}\ K^{-1}$ ]                                                                              |
| <code>epsilon</code>            | Ratio of gas constant for dry air / gas constant for water vapor                                                                   |
| <code>rho_ice</code>            | Density of ice [ $kg\ m^{-3}$ ]                                                                                                    |
| <code>kappa</code>              | Adiabatic index air                                                                                                                |
| <code>rho_msl</code>            | Standard atmospheric density at mean sea level (MSL) [ $kg\ m^{-3}$ ]                                                              |
| <code>T_msl</code>              | Standard atmospheric temperature at mean sea level (MSL) [ $K$ ]                                                                   |
| <code>c_msl</code>              | Speed of sound at mean sea level (MSL) in standard atmosphere [ $m\ s^{-1}$ ]                                                      |
| <code>T_lapse_rate</code>       | The rate at which the ISA ambient temperature falls with altitude [ $K\ m^{-1}$ ] [ <a href="#">Wikipedia contributors, 2023</a> ] |
| <code>solar_constant</code>     | Average incident solar radiation, [ $W\ m^{-2}$ ] This value can range +/- 3% as the earth orbits the sun.                         |
| <code>c_p_combustion</code>     | Isobaric heat capacity of combustion products [ $J\ kg^{-1}\ K^{-1}$ ]                                                             |
| <code>mu_ice</code>             | Real refractive index of ice                                                                                                       |
| <code>lambda_light</code>       | Wavelength of visible light (550 nm)                                                                                               |
| <code>c_r</code>                | Ratio between the volume mean radius and the effective radius (Uncertainty +/- 0.3)                                                |
| <code>nominal_rocd</code>       | Nominal rate of climb/descent of aircraft [ $m\ s^{-1}$ ]                                                                          |

`pycontrails.physics.constants.M_d = 0.0289647`

Molar mass of dry air [ $kg\ mol^{-1}$ ]

`pycontrails.physics.constants.M_v = 0.0180153`

Molar mass of water [ $kg\ mol^{-1}$ ]

`pycontrails.physics.constants.R = 8.314462618`

molar gas constant [ $J\ mol^{-1}\ K^{-1}$ ]

`pycontrails.physics.constants.R_d = 287.05`

Gas constant of dry air [ $J\ kg^{-1}\ K^{-1}$ ]

`pycontrails.physics.constants.R_v = 461.51`

Gas constant of water vapour [ $J\ kg^{-1}\ K^{-1}$ ]

`pycontrails.physics.constants.T_lapse_rate = -0.0065`

The rate at which the ISA ambient temperature falls with altitude [ $K\ m^{-1}$ ] [Wikipedia contributors, 2023]

`pycontrails.physics.constants.T_msl = 288.15`

Standard atmospheric temperature at mean sea level (MSL) [ $K$ ]

`pycontrails.physics.constants.absolute_zero = -273.15`

Absolute zero value [ $C$ ]

`pycontrails.physics.constants.c_msl = 340.294`

Speed of sound at mean sea level (MSL) in standard atmosphere [ $m\ s^{-1}$ ]

`pycontrails.physics.constants.c_p_combustion = 1250.0`

Isobaric heat capacity of combustion products [ $J\ kg^{-1}\ K^{-1}$ ]

`pycontrails.physics.constants.c_pd = 1004.0`

Isobaric heat capacity of dry air [ $J\ kg^{-1}\ K^{-1}$ ]

`pycontrails.physics.constants.c_pv = 1870.0`

Isobaric heat capacity of water vapor [ $J\ kg^{-1}\ K^{-1}$ ]

`pycontrails.physics.constants.c_r = 0.9`

Ratio between the volume mean radius and the effective radius (Uncertainty +/- 0.3)

`pycontrails.physics.constants.epsilon = 0.6219800221013629`

Ratio of gas constant for dry air / gas constant for water vapor

`pycontrails.physics.constants.g = 9.80665`

Gravitational acceleration [ $m\ s^{-2}$ ]

`pycontrails.physics.constants.gamma = 1.4`

which heat capacities?

**Type**

Ratio of heat capacities, TODO

`pycontrails.physics.constants.h_tropopause = 11000.0`

ISA height of the tropopause [ $m$ ] [Wikipedia contributors, 2023]

`pycontrails.physics.constants.kappa = 1.4`

Adiabatic index air

`pycontrails.physics.constants.lambda_light = 5.5e-07`

Wavelength of visible light (550 nm)

`pycontrails.physics.constants.mu_ice = 1.31`

Real refractive index of ice

`pycontrails.physics.constants.nominal_rocd = 12.7`

Nominal rate of climb/descent of aircraft [ $m\ s^{-1}$ ]

`pycontrails.physics.constants.p_surface = 101325.0`

Surface pressure, international standard atmosphere [ $Pa$ ] [Wikipedia contributors, 2023]

`pycontrails.physics.constants.radius_earth = 6371229.0`

Radius of Earth [ $m$ ]

`pycontrails.physics.constants.rho_ice = 917.0`

Density of ice [ $kg\ m^{-3}$ ]

`pycontrails.physics.constants.rho_msl = 1.225`

Standard atmospheric density at mean sea level (MSL) [ $kg\ m^{-3}$ ]

`pycontrails.physics.constants.seconds_per_year = 31557600.0`

Seconds in a Julian year [ $s$ ]

`pycontrails.physics.constants.solar_constant = 1361.0`

Average incident solar radiation, [ $W\ m^{-2}$ ] This value can range +/- 3% as the earth orbits the sun. From [Laboratory, 2022] citing [Paltridge *et al.*, 1976]

`pycontrails.physics.constants.surface_area_earth = 510072000000000.0`

Surface area of Earth [ $m^2$ ]

## 11.4.2 pycontrails.physics.thermo

Thermodynamic relationships.

### Functions

|                                                             |                                                                         |
|-------------------------------------------------------------|-------------------------------------------------------------------------|
| <code>T_potential(T, p)</code>                              | Calculate potential temperature.                                        |
| <code>T_potential_gradient(T_top, p_top, T_btm, ...)</code> | Calculate the potential temperature gradient between two altitudes.     |
| <code>brunt_vaisala_frequency(p, T, T_grad)</code>          | Calculate the Brunt-Vaisaila frequency.                                 |
| <code>c_pm(q)</code>                                        | Calculate isobaric heat capacity of moist air.                          |
| <code>e_sat_ice(T)</code>                                   | Calculate saturation pressure of water vapor over ice.                  |
| <code>e_sat_liquid(T)</code>                                | Calculate saturation pressure of water vapor over liquid water.         |
| <code>p_vapor(q, p)</code>                                  | Calculate the vapor pressure.                                           |
| <code>pressure_dz(T, p, dz)</code>                          | Calculate the pressure altitude dz meters below input pressure.         |
| <code>q_sat(T, p)</code>                                    | Calculate saturation specific humidity over liquid or ice.              |
| <code>q_sat_ice(T, p)</code>                                | Calculate saturation specific humidity over ice.                        |
| <code>q_sat_liquid(T, p)</code>                             | Calculate saturation specific humidity over liquid.                     |
| <code>rh(q, T, p)</code>                                    | Calculate the relative humidity with respect to liquid water.           |
| <code>rhi(q, T, p)</code>                                   | Calculate the relative humidity with respect to ice (RH <sub>i</sub> ). |
| <code>rho_d(T, p)</code>                                    | Calculate air density for (T, p) assuming dry air.                      |
| <code>rho_v(T, p)</code>                                    | Calculate the air density for (T, p) assuming all water vapor.          |

`pycontrails.physics.thermo.T_potential(T, p)`

Calculate potential temperature.

The potential temperature is the temperature that an air parcel would attain if adiabatically brought to a standard reference pressure, `constants.p_surface`.

#### Parameters

- **T** (*ArrayScalarLike*) – Temperature, [ $K$ ]
- **p** (*ArrayScalarLike*) – Pressure, [ $Pa$ ]

**Returns**

*ArrayScalarLike* – Potential Temperature, [K]

**References**

- [https://en.wikipedia.org/wiki/Potential\\_temperature](https://en.wikipedia.org/wiki/Potential_temperature)

`pycontrails.physics.thermo.T_potential_gradient(T_top, p_top, T_btm, p_btm, dz)`

Calculate the potential temperature gradient between two altitudes.

**Parameters**

- **T\_top** (*ArrayScalarLike*) – Temperature at original altitude, [K]
- **p\_top** (*ArrayScalarLike*) – Pressure at original altitude, [Pa]
- **T\_btm** (*ArrayScalarLike*) – Temperature at lower altitude, [K]
- **p\_btm** (*ArrayScalarLike*) – Pressure at lower altitude, [Pa]
- **dz** (`float`) – Difference in altitude between measurements, [m]

**Returns**

*ArrayScalarLike* – Potential Temperature gradient, [K m<sup>-1</sup>]

`pycontrails.physics.thermo.brunt_vaisala_frequency(p, T, T_grad)`

Calculate the Brunt-Vaisaila frequency.

The Brunt-Vaisaila frequency is the frequency at which a vertically displaced parcel will oscillate within a statically stable environment.

**Parameters**

- **p** (`numpy.ndarray`) – Pressure, [Pa]
- **T** (`numpy.ndarray`) – Temperature, [K]
- **T\_grad** (`numpy.ndarray`) – Potential Temperature gradient (see `T_potential_gradient()`), [K m<sup>-1</sup>]

**Returns**

`numpy.ndarray` – Brunt-Vaisaila frequency, [s<sup>-1</sup>]

**References**

- [https://en.wikipedia.org/wiki/Brunt%E2%80%93V%C3%A4is%C3%A4\\_frequency](https://en.wikipedia.org/wiki/Brunt%E2%80%93V%C3%A4is%C3%A4_frequency)

`pycontrails.physics.thermo.c_pm(q)`

Calculate isobaric heat capacity of moist air.

**Parameters**

**q** (*ArrayScalarLike*) – Specific humidity, [kg kg<sup>-1</sup>]

**Returns**

*ArrayScalarLike* – Isobaric heat capacity of moist air, [J kg<sup>-1</sup> K<sup>-1</sup>]

## Notes

Some models (including CoCiP) use a constant value here ( $1004 \text{ J kg}^{-1} \text{ K}^{-1}$ )

`pycontrails.physics.thermo.e_sat_ice(T)`

Calculate saturation pressure of water vapor over ice.

### Parameters

**T** (*ArrayScalarLike*) – Temperature, [K]

### Returns

*ArrayScalarLike* – Saturation pressure of water vapor over ice, [Pa]

## References

- [Sonntag, 1994]

`pycontrails.physics.thermo.e_sat_liquid(T)`

Calculate saturation pressure of water vapor over liquid water.

### Parameters

**T** (*ArrayScalarLike*) – Temperature, [K]

### Returns

*ArrayScalarLike* – Saturation pressure of water vapor over liquid water, [Pa]

## References

- [Sonntag, 1994]

`pycontrails.physics.thermo.p_vapor(q, p)`

Calculate the vapor pressure.

### Parameters

- **q** (*ArrayScalarTypeVar*) – Specific humidity, [ $\text{kg kg}^{-1}$ ]
- **p** (*ArrayScalarTypeVar*) – Pressure, [Pa]

### Returns

*ArrayScalarTypeVar* – Vapor pressure, [Pa]

`pycontrails.physics.thermo.pressure_dz(T, p, dz)`

Calculate the pressure altitude dz meters below input pressure.

Returns surface pressure if the calculated pressure altitude is greater than `constants.p_surface`.

### Parameters

- **T** (*ArrayScalarLike*) – Temperature, [K]
- **p** (*ArrayScalarLike*) – Pressure, [Pa]
- **dz** (*float*) – Difference in altitude between measurements, [m]

### Returns

*ArrayScalarLike* – Pressure at altitude, [Pa]

### Notes

This is used to calculate the temperature gradient and wind shear.

`pycontrails.physics.thermo.q_sat(T, p)`

Calculate saturation specific humidity over liquid or ice.

When T is above 0 C, liquid saturation is computed. Otherwise, ice saturation is computed.

#### Parameters

- **T** (*ArrayScalarLike*) – Temperature, [K]
- **p** (*ArrayScalarLike*) – Pressure, [Pa]

#### Returns

*ArrayScalarLike* – Saturation specific humidity, [ $kg\ kg^{-1}$ ]

### Notes

Smith et al. (1999)

`pycontrails.physics.thermo.q_sat_ice(T, p)`

Calculate saturation specific humidity over ice.

#### Parameters

- **T** (*ArrayScalarLike*) – Temperature, [K]
- **p** (*ArrayScalarLike*) – Pressure, [Pa]

#### Returns

*ArrayScalarLike* – Saturation specific humidity, [ $kg\ kg^{-1}$ ]

### Notes

Smith et al. (1999)

`pycontrails.physics.thermo.q_sat_liquid(T, p)`

Calculate saturation specific humidity over liquid.

#### Parameters

- **T** (*ArrayScalarLike*) – Temperature, [K]
- **p** (*ArrayScalarLike*) – Pressure, [Pa]

#### Returns

*ArrayScalarLike* – Saturation specific humidity, [ $kg\ kg^{-1}$ ]



## Notes

Smith et al. (1999)

`pycontrails.physics.thermo.rh(q, T, p)`

Calculate the relative humidity with respect to liquid water.

### Parameters

- **q** (*ArrayScalarLike*) – Specific humidity, [ $kg\ kg^{-1}$ ]
- **T** (*ArrayScalarLike*) – Temperature, [ $K$ ]
- **p** (*ArrayScalarLike*) – Pressure, [ $Pa$ ]

### Returns

*ArrayScalarLike* – Relative Humidity, [0 – 1]

`pycontrails.physics.thermo.rhi(q, T, p)`

Calculate the relative humidity with respect to ice (RH<sub>i</sub>).

### Parameters

- **q** (*ArrayScalarLike*) – Specific humidity, [ $kg\ kg^{-1}$ ]
- **T** (*ArrayScalarLike*) – Temperature, [ $K$ ]
- **p** (*ArrayScalarLike*) – Pressure, [ $Pa$ ]

### Returns

*ArrayScalarLike* – Relative Humidity over ice, [0 – 1]

`pycontrails.physics.thermo.rho_d(T, p)`

Calculate air density for (T, p) assuming dry air.

### Parameters

- **T** (*ArrayScalarLike*) – Temperature, [ $K$ ]
- **p** (*ArrayScalarLike*) – Pressure, [ $Pa$ ]

### Returns

*ArrayScalarLike* – Air density of dry air, [ $kg\ m^{-3}$ ]

`pycontrails.physics.thermo.rho_v(T, p)`

Calculate the air density for (T, p) assuming all water vapor.

### Parameters

- **T** (*ArrayScalarLike*) – Temperature, [ $K$ ]
- **p** (*ArrayScalarLike*) – Pressure, [ $Pa$ ]

### Returns

*ArrayScalarLike* – Air density of water vapor, [ $kg\ m^{-3}$ ]

### 11.4.3 pycontrails.physics.jet

Jet aircraft trajectory and performance parameters.

This module includes common functions to calculate jet aircraft trajectory and performance parameters, including fuel quantities, mass, thrust setting and propulsion efficiency.

#### Functions

|                                                                |                                                                                             |
|----------------------------------------------------------------|---------------------------------------------------------------------------------------------|
| <code>acceleration(true_airspeed, segment_duration)</code>     | Calculate the acceleration/deceleration at each waypoint.                                   |
| <code>air_to_fuel_ratio(thrust_setting, *[, ...])</code>       | Calculate air-to-fuel ratio from thrust setting.                                            |
| <code>aircraft_weight(aircraft_mass)</code>                    | Calculate the aircraft weight at each waypoint.                                             |
| <code>climb_descent_angle(true_airspeed, rocd)</code>          | Calculate angle between the horizontal plane and the actual flight path.                    |
| <code>clip_mach_number(true_airspeed, ...)</code>              | Compute the Mach number from the true airspeed and ambient temperature.                     |
| <code>combustor_inlet_pressure(pressure_ratio, ...)</code>     | Calculate combustor inlet pressure, $P_3$ .                                                 |
| <code>combustor_inlet_temperature(comp_efficiency, ...)</code> | Calculate combustor inlet temperature, $T_3$ .                                              |
| <code>compressor_inlet_pressure(p, mach_num)</code>            | Calculate compressor inlet pressure for Jet engine, $P_2$ .                                 |
| <code>compressor_inlet_temperature(T, mach_num)</code>         | Calculate compressor inlet temperature for Jet engine, $T_2$ .                              |
| <code>density_ratio(rho)</code>                                | Calculate the ratio of air density relative to the air density at mean-sea-level.           |
| <code>equivalent_fuel_flow_rate_at_cruise(...)</code>          | Convert fuel mass flow rate at sea level to equivalent fuel flow rate at cruise conditions. |
| <code>equivalent_fuel_flow_rate_at_sea_level(...)</code>       | Convert fuel mass flow rate at cruise conditions to equivalent flow rate at sea level.      |
| <code>fuel_burn(fuel_flow, segment_duration)</code>            | Calculate the fuel consumption at each waypoint.                                            |
| <code>initial_aircraft_mass(*, ...)</code>                     | Estimate initial aircraft mass as a function of load factor and fuel requirements.          |
| <code>overall_propulsion_efficiency(true_airspeed, ...)</code> | Calculate the overall propulsion efficiency (OPE).                                          |
| <code>pressure_ratio(p)</code>                                 | Calculate the ratio of ambient pressure relative to the surface pressure.                   |
| <code>reserve_fuel_requirements(rocd, altitude_ft, ...)</code> | Estimate reserve fuel requirements.                                                         |
| <code>temperature_ratio(T)</code>                              | Calculate the ratio of ambient temperature relative to the temperature at mean sea level.   |
| <code>thrust_force(altitude, true_airspeed, ...)</code>        | Calculate the thrust force at each waypoint.                                                |
| <code>thrust_setting_nd(true_airspeed, ...[, ...])</code>      | Calculate the non-dimensionalized thrust setting of a Jet engine.                           |
| <code>turbine_inlet_temperature(afr, T_comb_inlet, ...)</code> | Calculate turbine inlet temperature, $T_4$ .                                                |
| <code>update_aircraft_mass(*, ...)</code>                      | Update aircraft mass based on the simulated total fuel consumption.                         |

`pycontrails.physics.jet.acceleration(true_airspeed, segment_duration)`

Calculate the acceleration/deceleration at each waypoint.

#### Parameters

- **true\_airspeed** (`npt.NDArray[np.float64]`) – True airspeed, [ $m\ s^{-1}$ ]
- **segment\_duration** (`npt.NDArray[np.float64]`) – Time difference between waypoints, [ $s$ ]

**Returns**

`npt.NDArray[np.float64]` – Acceleration/deceleration, [ $m\ s^{-2}$ ]

**See also:**

`flight.segment_duration()`

`pycontrails.physics.jet.air_to_fuel_ratio(thrust_setting, *, cruise=False, T_compressor_inlet=None)`

Calculate air-to-fuel ratio from thrust setting.

**Parameters**

- **thrust\_setting** (*ArrayScalarLike*) – Engine thrust setting, unitless
- **cruise** (`bool`) – Estimate thrust setting for cruise conditions. Defaults to `False`.
- **T\_compressor\_inlet** (`None` | *ArrayScalarLike*) – Compressor inlet temperature, [ $K$ ]  
Required if `cruise` is `True`. Defaults to `None`

**Returns**

*ArrayScalarLike* – Air-to-fuel ratio, unitless

**References**

- [Cumpsty and Heyes, 2015]
- AFR equation from [Stettler *et al.*, 2013]
- Scaling factor to cruise from Eq. (30) of [DuBois and Paynter, 2006]

`pycontrails.physics.jet.aircraft_weight(aircraft_mass)`

Calculate the aircraft weight at each waypoint.

**Parameters**

**aircraft\_mass** (`ArrayOrFloat`) – Aircraft mass, [ $kg$ ]

**Returns**

`ArrayOrFloat` – Aircraft weight, [ $N$ ]

`pycontrails.physics.jet.climb_descent_angle(true_airspeed, rocd)`

Calculate angle between the horizontal plane and the actual flight path.

**Parameters**

- **true\_airspeed** (`npt.NDArray[np.float64]`) – True airspeed, [ $m\ s^{-1}$ ]
- **rocd** (`npt.NDArray[np.float64]`) – Rate of climb/descent, [ $ft\ min^{-1}$ ]

**Returns**

`npt.NDArray[np.float64]` – Climb (positive value) or descent (negative value) angle, [ $deg$ ]

**See also:**

`flight.segment_rocd()`, `flight.segment_true_airspeed()`

`pycontrails.physics.jet.clip_mach_number(true_airspeed, air_temperature, max_mach_number)`

Compute the Mach number from the true airspeed and ambient temperature.

This method clips the computed Mach number to the value of `max_mach_number`.

If no mach number exceeds `max_mach_number`, the original array `true_airspeed` and the computed Mach number are returned.

**Parameters**

- **true\_airspeed** (`npt.NDArray[np.float64]`) – Array of true airspeed, [ $m\ s^{-1}$ ]
- **air\_temperature** (`npt.NDArray[np.float64]`) – Array of ambient temperature, [math:  $K$ ]
- **max\_mach\_number** (`ArrayOrFloat`) – Maximum mach number associated to aircraft. If no clipping is desired, this can be set to `np.inf`.

**Returns**

- **true\_airspeed** (`npt.NDArray[np.float64]`) – Array of true airspeed, [ $m\ s^{-1}$ ]. All values are clipped at `max_mach_number`.
- **mach\_num** (`npt.NDArray[np.float64]`) – Array of Mach numbers, [ $Ma$ ]. All values are clipped at `max_mach_number`.

`pycontrails.physics.jet.combustor_inlet_pressure(pressure_ratio, p_comp_inlet, thrust_setting)`

Calculate combustor inlet pressure,  $P_3$ .

**Parameters**

- **pressure\_ratio** (`float`) – Engine pressure ratio, unitless
- **p\_comp\_inlet** (`ArrayScalarLike`) – Compressor inlet pressure, [ $Pa$ ]
- **thrust\_setting** (`ArrayScalarLike`) – Engine thrust setting, unitless

**Returns**

`ArrayScalarLike` – Combustor inlet pressure, [ $Pa$ ]

**References**

- [Stettler *et al.*, 2013]
- [Cumpsty and Heyes, 2015]

`pycontrails.physics.jet.combustor_inlet_temperature(comp_efficiency, T_comp_inlet, p_comp_inlet, p_comb_inlet)`

Calculate combustor inlet temperature,  $T_3$ .

**Parameters**

- **comp\_efficiency** (`float`) – Engine compressor efficiency, [0 – 1]
- **T\_comp\_inlet** (`ArrayScalarLike`) – Compressor inlet temperature, [ $K$ ]
- **p\_comp\_inlet** (`ArrayScalarLike`) – Compressor inlet pressure, [ $Pa$ ]
- **p\_comb\_inlet** (`ArrayScalarLike`) – Compressor inlet pressure, [ $Pa$ ]

**Returns**

`ArrayScalarLike` – Combustor inlet temperature, [ $K$ ]

## References

- [Stettler *et al.*, 2013]
- [Cumpsty and Heyes, 2015]

`pycontrails.physics.jet.compressor_inlet_pressure(p, mach_num)`

Calculate compressor inlet pressure for Jet engine,  $P_2$ .

### Parameters

- **p** (*ArrayScalarLike*) – Ambient pressure, [ $Pa$ ]
- **mach\_num** (*ArrayScalarLike*) – Mach number

### Returns

*ArrayScalarLike* – Compressor inlet pressure, [ $Pa$ ]

## References

- [Stettler *et al.*, 2013]
- [Cumpsty and Heyes, 2015]

`pycontrails.physics.jet.compressor_inlet_temperature(T, mach_num)`

Calculate compressor inlet temperature for Jet engine,  $T_2$ .

### Parameters

- **T** (*ArrayScalarLike*) – Ambient temperature, [ $K$ ]
- **mach\_num** (*ArrayScalarLike*) – Mach number

### Returns

*ArrayScalarLike* – Compressor inlet temperature, [ $K$ ]

## References

- [Stettler *et al.*, 2013]
- [Cumpsty and Heyes, 2015]

`pycontrails.physics.jet.density_ratio(rho)`

Calculate the ratio of air density relative to the air density at mean-sea-level.

### Parameters

**rho** (`npt.NDArray[np.float64]`) – Air density, [ $kg\ m^3$ ]

### Returns

`npt.NDArray[np.float64]` – Ratio of the density to the air density at mean sea-level (MSL).

`pycontrails.physics.jet.equivalent_fuel_flow_rate_at_cruise(fuel_flow_sls, theta_amb, delta_amb, mach_num)`

Convert fuel mass flow rate at sea level to equivalent fuel flow rate at cruise conditions.

Refer to Eq. (40) in [DuBois and Paynter, 2006].

### Parameters

- **fuel\_flow\_sls** (`npt.NDArray[np.float64] | float`) – Fuel mass flow rate, [ $kg\ s^{-1}$ ]

- **theta\_amb** (ArrayOrFloat) – Ratio of the ambient temperature to the temperature at mean sea-level.
- **delta\_amb** (ArrayOrFloat) – Ratio of the pressure altitude to the surface pressure.
- **mach\_num** (ArrayOrFloat) – Mach number

**Returns**

`npt.NDArray[np.float64]` – Estimate of fuel mass flow rate at sea level, [ $kg\ s^{-1}$ ]

**References**

- [DuBois and Paynter, 2006]

`pycontrails.physics.jet.equivalent_fuel_flow_rate_at_sea_level(fuel_flow_cruise, theta_amb, delta_amb, mach_num)`

Convert fuel mass flow rate at cruise conditions to equivalent flow rate at sea level.

Refer to Eq. (40) in [DuBois and Paynter, 2006].

**Parameters**

- **fuel\_flow\_cruise** (`npt.NDArray[np.float64]`) – Fuel mass flow rate per engine, [ $kg\ s^{-1}$ ]
- **theta\_amb** (`npt.NDArray[np.float64]`) – Ratio of the ambient temperature to the temperature at mean sea-level.
- **delta\_amb** (`npt.NDArray[np.float64]`) – Ratio of the pressure altitude to the surface pressure.
- **mach\_num** (`npt.NDArray[np.float64]`) – Mach number, [:math:  $Ma$ ]

**Returns**

`npt.NDArray[np.float64]` – Estimate of fuel flow per engine at sea level, [ $kg\ s^{-1}$ ].

**References**

- [DuBois and Paynter, 2006]

`pycontrails.physics.jet.fuel_burn(fuel_flow, segment_duration)`

Calculate the fuel consumption at each waypoint.

**Parameters**

- **fuel\_flow** (`npt.NDArray[np.float64]`) – Fuel mass flow rate, [ $kg\ s^{-1}$ ]
- **segment\_duration** (`npt.NDArray[np.float64]`) – Time difference between waypoints, [s]

**Returns**

`npt.NDArray[np.float64]` – Fuel consumption at each waypoint, [kg]

`pycontrails.physics.jet.initial_aircraft_mass(*, operating_empty_weight, max_takeoff_weight, max_payload, total_fuel_burn, total_reserve_fuel, load_factor)`

Estimate initial aircraft mass as a function of load factor and fuel requirements.

This function uses the following equation:

$$\begin{aligned} \text{TOM} &= \text{OEM} + \text{PM} + \text{FM}_{\text{nc}} + \text{TFM} \\ &= \text{OEM} + \text{LF} * \text{MPM} + \text{FM}_{\text{nc}} + \text{TFM} \end{aligned}$$

where: - TOM is the aircraft take-off mass - OEM is the aircraft operating empty weight - PM is the payload mass - FM<sub>nc</sub> is the mass of the fuel not consumed - TFM is the trip fuel mass - LF is the load factor - MPM is the maximum payload mass

#### Parameters

- **operating\_empty\_weight** (`float`) – Aircraft operating empty weight, i.e. the basic weight of an aircraft including the crew and necessary equipment, but excluding usable fuel and payload, [*kg*]
- **max\_takeoff\_weight** (`float`) – Aircraft maximum take-off weight, [*kg*]
- **max\_payload** (`float`) – Aircraft maximum payload, [*kg*]
- **total\_fuel\_burn** (`float`) – Total fuel consumption for the flight, obtained from prior iterations, [*kg*]
- **total\_reserve\_fuel** (`float`) – Total reserve fuel requirements, [*kg*]
- **load\_factor** (`float`) – Aircraft load factor assumption (between 0 and 1)

#### Returns

`float` – Aircraft mass at the initial waypoint, [*kg*]

#### References

- [Wasiuk *et al.*, 2015]

#### See also:

`reserve_fuel_requirements()`

`pycontrails.physics.jet.overall_propulsion_efficiency(true_airspeed, F_thrust, fuel_flow, q_fuel, is_descent, threshold=0.5)`

Calculate the overall propulsion efficiency (OPE).

Negative OPE values can occur during the descent phase and is clipped to a lower bound of 0, while an upper bound of `threshold` is also applied. The most efficient engines today do not exceed this value.

#### Parameters

- **true\_airspeed** (`npt.NDArray[np.float64]`) – True airspeed for each waypoint, [*ms*<sup>-1</sup>].
- **F\_thrust** (`npt.NDArray[np.float64]`) – Thrust force provided by the engine, [*N*].
- **fuel\_flow** (`npt.NDArray[np.float64]`) – Fuel mass flow rate, [*kg s*<sup>-1</sup>].
- **q\_fuel** (`float`) – Lower calorific value (LCV) of fuel, [*J kg<sub>fuel</sub>*<sup>-1</sup>].
- **is\_descent** (`npt.NDArray[np.float64] | None`) – Boolean array that indicates if a waypoint is in a descent phase.
- **threshold** (`float`) – Upper bound for realistic engine efficiency.

#### Returns

`npt.NDArray[np.float64]` – Overall propulsion efficiency (OPE)

## References

- [Schumann, 1996]
- [Cumpsty and Heyes, 2015]

`pycontrails.physics.jet.pressure_ratio(p)`

Calculate the ratio of ambient pressure relative to the surface pressure.

### Parameters

`p` (`npt.NDArray[np.float64]`) – Air pressure, [*Pa*]

### Returns

`npt.NDArray[np.float64]` – Ratio of the pressure altitude to the surface pressure.

`pycontrails.physics.jet.reserve_fuel_requirements(rocd, altitude_ft, fuel_flow, fuel_burn)`

Estimate reserve fuel requirements.

### Parameters

- `rocd` (`npt.NDArray[np.float64]`) – Rate of climb and descent, [*ft min<sup>-1</sup>*]
- `altitude_ft` (`npt.NDArray[np.float64]`) – Altitude, [*ft*]
- `fuel_flow` (`npt.NDArray[np.float64]`) – Fuel mass flow rate, [*kg s<sup>-1</sup>*].
- `fuel_burn` (`npt.NDArray[np.float64]`) – Fuel consumption for each waypoint, [*kg*]

### Returns

`npt.NDArray[np.float64]` – Reserve fuel requirements, [*kg*]

## References

- [Wasiuk *et al.*, 2015]

## Notes

The real-world calculation of the reserve fuel requirements is highly complex (refer to Section 2.3.3 of [Wasiuk *et al.*, 2015]). This implementation is simplified by taking the maximum between the following two conditions:

1. Fuel required to fly +90 minutes at the main cruise altitude at the end of the cruise aircraft weight.
2. Uplift the total fuel consumption for the flight by +15%

### See also:

`flight.segment_phase()`, `fuel_burn()`

`pycontrails.physics.jet.temperature_ratio(T)`

Calculate the ratio of ambient temperature relative to the temperature at mean sea level.

### Parameters

`T` (`npt.NDArray[np.float64]`) – Air temperature, [*K*]

### Returns

`npt.NDArray[np.float64]` – Ratio of the temperature to the temperature at mean sea-level (MSL).



`pycontrails.physics.jet.thrust_force(altitude, true_airspeed, segment_duration, aircraft_mass, F_drag)`

Calculate the thrust force at each waypoint.

#### Parameters

- **altitude** (`npt.NDArray[np.float64]`) – Waypoint altitude, [ $m$ ]
- **true\_airspeed** (`npt.NDArray[np.float64]`) – True airspeed, [ $m\ s^{-1}$ ]
- **segment\_duration** (`npt.NDArray[np.float64]`) – Time difference between waypoints, [ $s$ ]
- **aircraft\_mass** (`npt.NDArray[np.float64]`) – Aircraft mass, [ $kg$ ]
- **F\_drag** (`npt.NDArray[np.float64]`) – Draft force, [ $N$ ]

#### Returns

`npt.NDArray[np.float64]` – Thrust force, [ $N$ ]

#### References

- [Eurocontrol, 2010]

#### Notes

The model balances the rate of forces acting on the aircraft with the rate in increase in energy.

This estimate of thrust force is used in the BADA Total-Energy Model (Eq. 3.2-1).

Negative thrust must be corrected.

`pycontrails.physics.jet.thrust_setting_nd(true_airspeed, thrust_setting, T, p, pressure_ratio, q_fuel, *, comp_efficiency=0.9, cruise=False)`

Calculate the non-dimensionalized thrust setting of a Jet engine.

Result is in terms of the ratio of turbine inlet to the compressor inlet temperature ( $t4\_t2$ )

#### Parameters

- **true\_airspeed** (*ArrayScalarLike*) – True airspeed, [ $m\ s^{-1}$ ]
- **thrust\_setting** (*ArrayScalarLike*) – Engine thrust setting, unitless
- **T** (*ArrayScalarLike*) – Ambient temperature, [ $K$ ]
- **p** (*ArrayScalarLike*) – Ambient pressure, [ $Pa$ ]
- **pressure\_ratio** (`float`) – Engine pressure ratio, unitless
- **q\_fuel** (`float`) – Lower calorific value (LCV) of fuel, [ $J\ kg_{fuel}^{-1}$ ]
- **comp\_efficiency** (`float, optional`) – Engine compressor efficiency, [ $0 - 1$ ]. Defaults to 0.9
- **cruise** (`bool, optional`) – Defaults to False

#### Returns

*ArrayScalarLike* – Ratio of turbine inlet to the compressor inlet temperature, unitless

## References

- [Cumpsty and Heyes, 2015]
- [Teoh *et al.*, 2022]

`pycontrails.physics.jet.turbine_inlet_temperature(afr, T_comb_inlet, q_fuel)`

Calculate turbine inlet temperature,  $T_4$ .

### Parameters

- **afr** (*ArrayScalarLike*) – Air-to-fuel ratio, unitless
- **T\_comb\_inlet** (*ArrayScalarLike*) – Combustor inlet temperature, [K]
- **q\_fuel** (`float`) – Lower calorific value (LCV) of fuel, [ $J\ kg_{fuel}^{-1}$ ]

### Returns

*ArrayScalarLike* – Turbine inlet temperature, [K]

## References

- [Cumpsty and Heyes, 2015]

`pycontrails.physics.jet.update_aircraft_mass(*, operating_empty_weight, max_takeoff_weight, max_payload, fuel_burn, total_reserve_fuel, load_factor, takeoff_mass)`

Update aircraft mass based on the simulated total fuel consumption.

Used internally for finding aircraft mass iteratively.

### Parameters

- **operating\_empty\_weight** (`float`) – Aircraft operating empty weight, i.e. the basic weight of an aircraft including the crew and necessary equipment, but excluding usable fuel and payload, [kg].
- **ref\_mass** (`float`) – Aircraft reference mass, [kg].
- **max\_takeoff\_weight** (`float`) – Aircraft maximum take-off weight, [kg].
- **max\_payload** (`float`) – Aircraft maximum payload, [kg]
- **fuel\_burn** (`npt.NDArray[np.float64]`) – Fuel consumption for each waypoint, [kg]
- **total\_reserve\_fuel** (`float`) – Total reserve fuel requirements, [kg]
- **load\_factor** (`float`) – Aircraft load factor assumption (between 0 and 1). This is the ratio of the actual payload weight to the maximum payload weight.
- **takeoff\_mass** (`float | None`) – Initial aircraft mass, [kg]. If `None`, the initial mass is calculated using `initial_aircraft_mass()`. If supplied, all other parameters except `fuel_burn` are ignored.

### Returns

`npt.NDArray[np.float64]` – Updated aircraft mass, [kg]

See also:

`fuel_burn()`, `reserve_fuel_requirements()`, `initial_aircraft_mass()`

## 11.4.4 pycontrails.physics.geo

Tools for spherical geometry, solar radiation, and wind advection.

### Functions

|                                                           |                                                                                             |
|-----------------------------------------------------------|---------------------------------------------------------------------------------------------|
| <i>advect_latitude</i> (latitude, v_wind, dt)             | Calculate the latitude of a particle after time <i>dt</i> caused by advection due to wind.  |
| <i>advect_level</i> (level, vertical_velocity, ...)       | Calculate the pressure level of a particle after time <i>dt</i> .                           |
| <i>advect_longitude</i> (longitude, latitude, u_wind, dt) | Calculate the longitude of a particle after time <i>dt</i> caused by advection due to wind. |
| <i>azimuth</i> (lons0, lats0, lons1, lats1)               | Calculate angle relative to true north for set of coordinates.                              |
| <i>azimuth_to_direction</i> (azimuth_, latitude)          | Calculate rectangular direction from spherical azimuth.                                     |
| <i>cosine_solar_zenith_angle</i> (longitude, ...)         | Calculate the cosine of the solar zenith angle.                                             |
| <i>days_since_reference_year</i> (time[, ref_year])       | Calculate the days elapsed since the start of the reference year.                           |
| <i>domain_surface_area</i> ([spatial_bbox, ...])          | Calculate surface area in the provided spatial bounding box.                                |
| <i>forward_azimuth</i> (lons, lats, az, dist)             | Calculate coordinates along forward azimuth.                                                |
| <i>grid_surface_area</i> (longitude, latitude)            | Calculate surface area that is covered by each pixel in a longitude-latitude grid.          |
| <i>haversine</i> (lons0, lats0, lons1, lats1)             | Calculate haversine distance between points in (lons0, lats0) and (lons1, lats1).           |
| <i>hours_since_start_of_day</i> (time)                    | Calculate the hours elapsed since the start of day (00:00:00 UTC).                          |
| <i>longitudinal_angle</i> (lons0, lats0, lons1, lats1)    | Calculate angle with longitudinal axis for sequence of segments.                            |
| <i>orbital_correction_for_solar_hour_angle</i> (...)      | Calculate correction to the solar hour angle due to Earth's orbital location.               |
| <i>orbital_position</i> (time)                            | Calculate the orbital position of Earth to a reference point set at the start of year.      |
| <i>segment_angle</i> (longitude, latitude)                | Calculate the angle between coordinate segments and the longitudinal axis.                  |
| <i>segment_azimuth</i> (longitude, latitude)              | Calculate the angle between coordinate segments and true north.                             |
| <i>segment_haversine</i> (longitude, latitude)            | Calculate haversine distance between consecutive points along path.                         |
| <i>segment_length</i> (longitude, latitude, altitude)     | Calculate the segment length between coordinates by assuming a great circle distance.       |
| <i>solar_constant</i> (theta_rad)                         | Calculate the solar electromagnetic radiation per unit area from orbital position.          |
| <i>solar_declination_angle</i> (theta_rad)                | Calculate the solar declination angle from the orbital position in radians (theta_rad).     |
| <i>solar_direct_radiation</i> (longitude, latitude, time) | Calculate the instantaneous theoretical solar direct radiation (SDR).                       |
| <i>solar_hour_angle</i> (longitude, time, theta_rad)      | Calculate the sun's East to West angular displacement around the polar axis.                |
| <i>spatial_bounding_box</i> (longitude, latitude[, ...])  | Construct rectangular spatial bounding box from a set of waypoints.                         |

`pycontrails.physics.geo.advect_latitude(latitude, v_wind, dt)`

Calculate the latitude of a particle after time `dt` caused by advection due to wind.

---

**Note:** It is possible for advected latitude values to lie outside of the WGS84 domain  $[-90, 90]$ . In Cocip models, latitude values close to the poles create an end of life condition, thereby avoiding this issue. In practice, such situations are very rare.

These polar divergence issues could also be addressed by reflecting the longitude values 180 degrees via a spherical equivalence such as  $(lon, lat) \sim (lon + 180, 180 - lat)$ . This approach is not currently taken.

---

#### Parameters

- **latitude** (*ArrayLike*) – Original latitude, [deg]
- **v\_wind** (*ArrayLike*) – Wind speed in the latitudinal direction, [ $ms^{-1}$ ]
- **dt** (*numpy.ndarray*) – Advection time delta

#### Returns

*ArrayLike* – New latitude value, [deg]

`pycontrails.physics.geo.advect_level(level, vertical_velocity, rho_air, terminal_fall_speed, dt)`

Calculate the pressure level of a particle after time `dt`.

This function calculates the new pressure level of a particle as a result of vertical advection caused by the vertical velocity and terminal fall speed.

#### Parameters

- **level** (*ArrayLike*) – Pressure level, [*hPa*]
- **vertical\_velocity** (*ArrayLike*) – Vertical velocity, [ $Pa s^{-1}$ ]
- **rho\_air** (*ArrayLike* | *float*) – Air density, [ $kg m^{-3}$ ]
- **terminal\_fall\_speed** (*ArrayLike* | *float*) – Terminal fall speed of the particle, [ $ms^{-1}$ ]
- **dt** (*npt.NDArray[npt.timedelta64]* | *np.timedelta64*) – Time delta for each way-point

#### Returns

*ArrayLike* – New pressure level, [*hPa*]

`pycontrails.physics.geo.advect_longitude(longitude, latitude, u_wind, dt)`

Calculate the longitude of a particle after time `dt` caused by advection due to wind.

Automatically wrap over the antimeridian if necessary.

#### Parameters

- **longitude** (*ArrayLike*) – Original longitude, [deg]
- **latitude** (*ArrayLike*) – Original latitude, [deg]
- **u\_wind** (*ArrayLike*) – Wind speed in the longitudinal direction, [ $ms^{-1}$ ]
- **dt** (*numpy.ndarray*) – Advection timestep

#### Returns

*ArrayLike* – New longitude value, [deg]

`pycontrails.physics.geo.azimuth(lons0, lats0, lons1, lats1)`

Calculate angle relative to true north for set of coordinates.

#### Parameters

- **lons0** (`npt.NDArray[np.float64]`) – Longitude values of initial endpoints, [deg].
- **lats0** (`npt.NDArray[np.float64]`) – Latitude values of initial endpoints, [deg].
- **lons1** (`npt.NDArray[np.float64]`) – Longitude values of terminal endpoints, [deg].
- **lats1** (`npt.NDArray[np.float64]`) – Latitude values of terminal endpoints, [deg].

#### References

- [Wikipedia contributors, 2023]

#### Returns

`npt.NDArray[np.float64]` – Azimuth relative to true north (0 deg), [deg]

See also:

[`longitudinal\_angle\(\)`](#)

`pycontrails.physics.geo.azimuth_to_direction(azimuth_, latitude)`

Calculate rectangular direction from spherical azimuth.

This implementation uses the equation

$$\cos(\text{latitude}) / \tan(\text{azimuth}) = \sin_a / \cos_a$$

to solve for  $\sin_a$  and  $\cos_a$ .

#### Parameters

- **azimuth\_** (`npt.NDArray[np.float64]`) – Angle measured clockwise from true north, [deg]
- **latitude** (`npt.NDArray[np.float64]`) – Latitude value of the point, [deg]

#### Returns

`tuple[npt.NDArray[np.float64], npt.NDArray[np.float64]]` – A tuple of sine and cosine values.

`pycontrails.physics.geo.cosine_solar_zenith_angle(longitude, latitude, time, theta_rad)`

Calculate the cosine of the solar zenith angle.

Return  $\cos(\theta)$ , where  $\theta$  is the angle between the sun and the vertical direction.

#### Parameters

- **longitude** (*ArrayLike*) – Longitude, [deg]
- **latitude** (*ArrayLike*) – Latitude, [deg]
- **time** (*ArrayLike*) – Time, formatted as `np.datetime64`
- **theta\_rad** (*ArrayLike*) – Orbital position, [rad]. Output of [`orbital\_position\(\)`](#).

#### Returns

*ArrayLike* – Cosine of the solar zenith angle

## References

- [Wikipedia contributors, 2023]

### See also:

`orbital_position()`, `solar_declination_angle()`, `solar_hour_angle()`

`pycontrails.physics.geo.days_since_reference_year(time, ref_year=2000)`

Calculate the days elapsed since the start of the reference year.

#### Parameters

- **time** (*ArrayLike*) – ArrayLike of `np.datetime64` times
- **ref\_year** (`int`, *optional*) – Year of reference

#### Returns

*ArrayLike* – Days elapsed since the reference year. Output dtype is `np.float64`.

#### Raises

**RuntimeError** – Raises when reference year is greater than the time of *time* element

`pycontrails.physics.geo.domain_surface_area(spatial_bbox=(-180.0, -90.0, 180.0, 90.0),  
spatial_grid_res=0.5)`

Calculate surface area in the provided spatial bounding box.

#### Parameters

- **spatial\_bbox** (`tuple`[`float`, `float`, `float`, `float`]) – Spatial bounding box, (`lon_min`, `lat_min`, `lon_max`, `lat_max`), [`deg`]
- **spatial\_grid\_res** (`float`) – Spatial grid resolution, [`deg`]

#### Returns

`float` – Domain surface area, [`m2`]

`pycontrails.physics.geo.forward_azimuth(lons, lats, az, dist)`

Calculate coordinates along forward azimuth.

This function is identical to the `pyproj.Geod.fwd` method when working on a spherical earth. Both signatures are also identical. This implementation is generally more performant.

#### Parameters

- **lons** (`npt.NDArray`[`np.float64`]) – Array of longitude values.
- **lats** (`npt.NDArray`[`np.float64`]) – Array of latitude values.
- **az** (`npt.NDArray`[`np.float64` | `float`]) – Azimuth, measured in [`deg`].
- **dist** (`npt.NDArray`[`np.float64` | `float`]) – Distance [`m`] between initial longitude latitude values and point to be computed.

#### Returns

`tuple`[`npt.NDArray`[`np.float64`], `npt.NDArray`[`np.float64`]] – Tuple of longitude latitude arrays.

### See also:

`:meth:pyproj.Geod.fwd`

`pycontrails.physics.geo.grid_surface_area(longitude, latitude)`

Calculate surface area that is covered by each pixel in a longitude-latitude grid.

#### Parameters

- **longitude** (`npt.NDArray[np.float64]`) – Longitude coordinates in a longitude-latitude grid, [deg]. Must be in ascending order.
- **latitude** (`npt.NDArray[np.float64]`) – Latitude coordinates in a longitude-latitude grid, [deg]. Must be in ascending order.

#### Returns

`xarray.DataArray` – Surface area of each pixel in a longitude-latitude grid, [ $m^2$ ]

#### References

- [https://www.pmel.noaa.gov/maillists/tmap/ferret\\_users/fu\\_2004/msg00023.html](https://www.pmel.noaa.gov/maillists/tmap/ferret_users/fu_2004/msg00023.html)

`pycontrails.physics.geo.haversine(lons0, lats0, lons1, lats1)`

Calculate haversine distance between points in (lons0, lats0) and (lons1, lats1).

Handles coordinates crossing the antimeridian line (-180, 180).

#### Parameters

- **lons0, lats0** (*ArrayLike*) – Coordinates of initial points, [deg]
- **lons1, lats1** (*ArrayLike*) – Coordinates of terminal points, [deg]

#### Returns

*ArrayLike* – Distances between corresponding points. [ $m$ ]

#### Notes

This formula does not take into account the non-spheroidal (ellipsoidal) shape of the Earth. Originally referenced from <https://andrew.hedges.name/experiments/haversine/>.

#### References

- [*Calculate Distance and Bearing between Two Latitude/Longitude Points Using Haversine Formula in JavaScript*, n.d.]

#### See also:

`sklearn.metrics.pairwise.haversine_distances()`

Compute the Haversine distance

`pyproj.Geod`

Performs forward and inverse geodetic, or Great Circle, computations

`pycontrails.physics.geo.hours_since_start_of_day(time)`

Calculate the hours elapsed since the start of day (00:00:00 UTC).

#### Parameters

**time** (*ArrayLike*) – ArrayLike of `np.datetime64` times

**Returns**

*ArrayLike* – Hours elapsed since the start of today day. Output dtype is `np.float64`.

`pycontrails.physics.geo.longitudinal_angle(lons0, lats0, lons1, lats1)`

Calculate angle with longitudinal axis for sequence of segments.

**Parameters**

- **lons0** (`npt.NDArray[np.float64]`) – Longitude values of initial endpoints, [deg].
- **lats0** (`npt.NDArray[np.float64]`) – Latitude values of initial endpoints, [deg].
- **lons1** (`npt.NDArray[np.float64]`) – Longitude values of terminal endpoints, [deg].
- **lats1** (`npt.NDArray[np.float64]`) – Latitude values of terminal endpoints, [deg].

**References**

- [Wikipedia contributors, 2023]

**Returns**

- **sin\_a** (`npt.NDArray[np.float64]`) – Sine values.
- **cos\_a** (`npt.NDArray[np.float64]`) – Cosine values.

`pycontrails.physics.geo.orbital_correction_for_solar_hour_angle(theta_rad)`

Calculate correction to the solar hour angle due to Earth's orbital location.

**Parameters**

**theta\_rad** (*ArrayLike*) – Orbital position, [rad]

**Returns**

*ArrayLike* – Correction to the solar hour angle as a result of Earth's orbital location, [deg]

**References**

- [Paltridge *et al.*, 1976]

**Notes**

Tested against [NOAA, n.d.]

`pycontrails.physics.geo.orbital_position(time)`

Calculate the orbital position of Earth to a reference point set at the start of year.

**Parameters**

**time** (*ArrayLike*) – ArrayLike of `np.datetime64` times

**Returns**

*ArrayLike* – Orbital position of Earth, [rad]

`pycontrails.physics.geo.segment_angle(longitude, latitude)`

Calculate the angle between coordinate segments and the longitudinal axis.

`np.nan` is added to the final value so the length of the output is the same as the inputs.

**Parameters**



- **longitude** (`npt.NDArray[np.float64]`) – Longitude values, [deg]
- **latitude** (`npt.NDArray[np.float64]`) – Latitude values, [deg]

**Returns**

`tuple[npt.NDArray[np.float64], npt.NDArray[np.float64]]` –  $\sin(a)$ ,  $\cos(a)$ , where  $a$  is the angle between the segment and the longitudinal axis. Final entry of each array is set to `np.nan`.

**References**

- [Wikipedia contributors, 2023]

**Notes**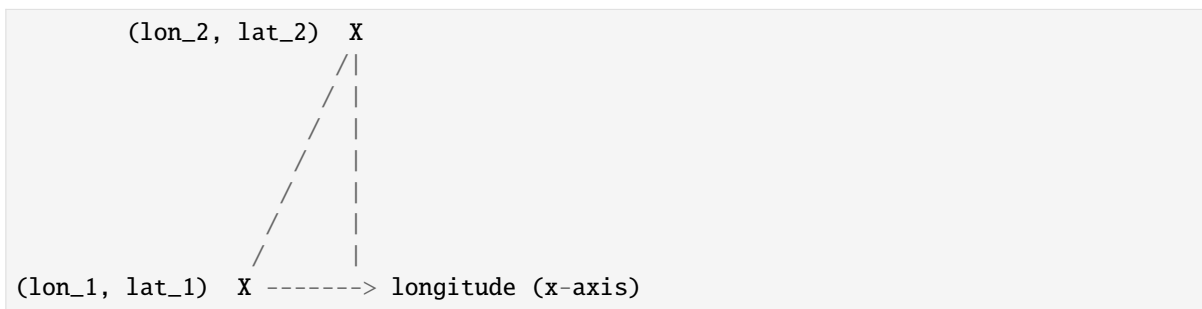**See also:**

`longitudinal_angle()`

`pycontrails.physics.geo.segment_azimuth(longitude, latitude)`

Calculate the angle between coordinate segments and true north.

`np.nan` is added to the final value so the length of the output is the same as the inputs.

**Parameters**

- **longitude** (`npt.NDArray[np.float64]`) – Longitude values, [deg]
- **latitude** (`npt.NDArray[np.float64]`) – Latitude values, [deg]

**Returns**

`npt.NDArray[np.float64]` – Azimuth relative to true north (0 deg), [deg] Final entry of each array is set to `np.nan`.

**References**

- [Wikipedia contributors, 2023]

**See also:**

`azimuth()`

`pycontrails.physics.geo.segment_haversine(longitude, latitude)`

Calculate haversine distance between consecutive points along path.

**Parameters**

- **longitude** (`npt.NDArray[np.float64]`) – 1D Longitude values with index corresponding to latitude inputs, [deg]
- **latitude** (`npt.NDArray[np.float64]`) – 1D Latitude values with index corresponding to longitude inputs, [deg]

**Returns**

`npt.NDArray[np.float64]` – Haversine distance between (`lat_i, lon_i`) and (`lat_i+1, lon_i+1`), [`m`] The final entry of the output is set to `nan`.

**See also:**

[`pyproj.Geod.line\_lengths\(\)`](#)

`pycontrails.physics.geo.segment_length(longitude, latitude, altitude)`

Calculate the segment length between coordinates by assuming a great circle distance.

Requires coordinates to be in EPSG:4326. Lengths are calculated using both horizontal and vertical displacement of segments.

`np.nan` is added to the final value so the length of the output is the same as the inputs.

**Parameters**

- **longitude** (`npt.NDArray[np.float64]`) – Longitude values, [deg]
- **latitude** (`npt.NDArray[np.float64]`) – Latitude values, [deg]
- **altitude** (`npt.NDArray[np.float64]`) – Altitude values, [`m`]

**Returns**

`npt.NDArray[np.float64]` – Array of distances in [`m`] between coordinates. Final entry of each array is set to `np.nan`.

**See also:**

[`haversine\(\)`](#), [`segment\_haversine\(\)`](#)

`pycontrails.physics.geo.solar_constant(theta_rad)`

Calculate the solar electromagnetic radiation per unit area from orbital position.

On average, the extraterrestrial irradiance is 1367 W/m\*\*2 and varies by +- 3% as the Earth orbits the sun.

**Parameters**

**theta\_rad** (*ArrayLike*) – Orbital position, [`rad`]. Use [`orbital\_position\(\)`](#) to calculate the orbital position from time input.

**Returns**

*ArrayLike* – Solar constant, [ $Wm^{-2}$ ]

**References**

- [Laboratory, 2022]
- [Paltridge *et al.*, 1976]
- [Duffie and Beckman, 1991]

## Notes

$orbital_{effect} = (R_{av}/R)^2$  where  $R$  is the separation of Earth from the sun and  $R_{av}$  is the mean separation.

`pycontrails.physics.geo.solar_declination_angle(theta_rad)`

Calculate the solar declination angle from the orbital position in radians (`theta_rad`).

The solar declination angle is the angle between the rays of the Sun and the plane of the Earth's equator.

It has a range of between -23.5 (winter solstice) and +23.5 (summer solstice) degrees.

### Parameters

**theta\_rad** (*ArrayLike*) – Orbital position, [*rad*]. Output of `orbital_position()`.

### Returns

*ArrayLike* – Solar declination angle, [deg]

## References

- [Paltridge *et al.*, 1976]

## Notes

Tested against [NOAA, n.d.]

### See also:

`orbital_position()`, `cosine_solar_zenith_angle()`

`pycontrails.physics.geo.solar_direct_radiation(longitude, latitude, time, threshold_cos_sza=0.0)`

Calculate the instantaneous theoretical solar direct radiation (SDR).

### Parameters

- **longitude** (*ArrayLike*) – Longitude, [deg]
- **latitude** (*ArrayLike*) – Latitude, [deg]
- **time** (*ArrayLike*) – Time, formatted as `np.datetime64`
- **threshold\_cos\_sza** (*float*, *optional*) – Set the SDR to 0 when the `cosine_solar_zenith_angle()` is below a certain value. By default, set to 0.

### Returns

*ArrayLike* – Solar direct radiation of incoming radiation, [ $Wm^{-2}$ ]

## References

- [Laboratory, 2022]

`pycontrails.physics.geo.solar_hour_angle(longitude, time, theta_rad)`

Calculate the sun's East to West angular displacement around the polar axis.

The solar hour angle is an expression of time in angular measurements: the value of the hour angle is zero at noon, negative in the morning, and positive in the afternoon, increasing by 15 degrees per hour.

### Parameters

- **longitude** (*ArrayLike*) – Longitude, [deg]

- **time** (*ArrayLike*) – ArrayLike of `np.datetime64` times
- **theta\_rad** (*ArrayLike*) – Orbital position, [*rad*]. Output of `orbital_position()`.

**Returns**

*ArrayLike* – Solar hour angle, [deg]

**See also:**

`orbital_position()`, `cosine_solar_zenith_angle()`, `orbital_correction_for_solar_hour_angle()`

`pycontrails.physics.geo.spatial_bounding_box(longitude, latitude, buffer=1.0)`

Construct rectangular spatial bounding box from a set of waypoints.

**Parameters**

- **longitude** (`numpy.ndarray`) – 1D Longitude values with index corresponding to longitude inputs, [deg]
- **latitude** (`numpy.ndarray`) – 1D Latitude values with index corresponding to latitude inputs, [deg]
- **buffer** (`float`) – Add buffer to rectangular spatial bounding box, [deg]

**Returns**

`tuple[float, float, float, float]` – Spatial bounding box, (lon\_min, lat\_min, lon\_max, lat\_max), [deg]

**Examples**

```
>>> rng = np.random.default_rng(654321)
>>> lon = rng.uniform(-180, 180, size=30)
>>> lat = rng.uniform(-90, 90, size=30)
>>> spatial_bounding_box(lon, lat)
(-168.0, -77.0, 155.0, 82.0)
```

## 11.4.5 pycontrails.physics.units

Unit conversion support.

## Functions

|                                                             |                                                                                         |
|-------------------------------------------------------------|-----------------------------------------------------------------------------------------|
| <code>degrees_to_radians(degrees)</code>                    | Convert from degrees to radians.                                                        |
| <code>dt_to_seconds(dt[, dtype])</code>                     | Convert a time delta to seconds as a float with specified <code>dtype</code> precision. |
| <code>ft_to_m(ft)</code>                                    | Convert length from feet to meter.                                                      |
| <code>ft_to_pl(h)</code>                                    | Convert from altitude (ft) to pressure level (hPa).                                     |
| <code>kelvin_to_celsius(kelvin)</code>                      | Convert temperature from Kelvin to Celsius.                                             |
| <code>knots_to_m_per_s(knots)</code>                        | Convert speed from knots to meters per second (m/s).                                    |
| <code>latitude_distance_to_m(distance_degrees)</code>       | Convert latitude degrees distance between two points to cartesian distances in meters.  |
| <code>lbs_to_kg(lbs)</code>                                 | Convert mass from pounds (lbs) to kilograms (kg).                                       |
| <code>longitude_distance_to_m(distance_degrees, ...)</code> | Convert longitude degrees distance between two points to cartesian distances in meters. |
| <code>m_per_s_to_knots(m_per_s)</code>                      | Convert speed from meters per second (m/s) to knots.                                    |
| <code>m_to_T_isa(h)</code>                                  | Calculate the ambient temperature (K) for a given altitude (m).                         |
| <code>m_to_ft(m)</code>                                     | Convert length from meters to feet.                                                     |
| <code>m_to_latitude_distance(distance_m)</code>             | Convert cartesian distance (meters) to differences in latitude degrees.                 |
| <code>m_to_longitude_distance(distance_m, ...)</code>       | Convert cartesian distance (meters) to differences in longitude degrees.                |
| <code>m_to_pl(h)</code>                                     | Convert from altitude (m) to pressure level (hPa).                                      |
| <code>mach_number_to_tas(mach_number, T)</code>             | Calculate true airspeed from the Mach number at a specified ambient temperature.        |
| <code>pl_to_ft(pl)</code>                                   | Convert from pressure level (hPa) to altitude (ft).                                     |
| <code>pl_to_m(pl)</code>                                    | Convert from pressure level (hPa) to altitude (m).                                      |
| <code>radians_to_degrees(radians)</code>                    | Convert from radians to degrees.                                                        |
| <code>tas_to_mach_number(true_airspeed, T)</code>           | Calculate Mach number from true airspeed at a specified ambient temperature.            |

`pycontrails.physics.units.degrees_to_radians(degrees)`

Convert from degrees to radians.

### Parameters

**degrees** (*ArrayScalarLike*) – Degrees values, [deg]

### Returns

*ArrayScalarLike* – Radians values

`pycontrails.physics.units.dt_to_seconds(dt, dtype=<class 'numpy.float64'>)`

Convert a time delta to seconds as a float with specified `dtype` precision.

### Parameters

- **dt** (*numpy.ndarray*) – Time delta for each waypoint
- **dtype** (*np.dtype*) – Data type of the output array

### Returns

*numpy.ndarray* – Time delta in seconds as a float

`pycontrails.physics.units.ft_to_m(ft)`

Convert length from feet to meter.

**Parameters**

**ft** (*ArrayScalarLike*) – length, [*ft*]

**Returns**

*ArrayScalarLike* – length, [*m*]

`pycontrails.physics.units.ft_to_pl(h)`

Convert from altitude (ft) to pressure level (hPa).

Assumes the ICAO standard atmosphere.

**Parameters**

**h** (*ArrayScalarLike*) – altitude, [*ft*]

**Returns**

*ArrayScalarLike* – pressure level, [*hPa*], [*mbar*]

See also:

`m_to_pl`, `pl_to_ft`, `m_to_T_isa`

`pycontrails.physics.units.kelvin_to_celsius(kelvin)`

Convert temperature from Kelvin to Celsius.

**Parameters**

**kelvin** (*ArrayScalarLike*) – temperature [*K*]

**Returns**

*ArrayScalarLike* – temperature [*C*]

`pycontrails.physics.units.knots_to_m_per_s(knots)`

Convert speed from knots to meters per second (m/s).

**Parameters**

**knots** (*ArrayScalarLike*) – Speed, [*knots*]

**Returns**

*ArrayScalarLike* – Speed, [*m s<sup>-1</sup>*]

`pycontrails.physics.units.latitude_distance_to_m(distance_degrees)`

Convert latitude degrees distance between two points to cartesian distances in meters.

**Parameters**

**distance\_degrees** (*ArrayScalarLike*) – latitude distance, [*deg*]

**Returns**

*ArrayScalarLike* – Cartesian distance along the latitude axis, [*m*]

`pycontrails.physics.units.lbs_to_kg(lbs)`

Convert mass from pounds (lbs) to kilograms (kg).

**Parameters**

**lbs** (*ArrayScalarLike*) – mass, pounds [*lbs*]

**Returns**

*ArrayScalarLike* – mass, kilograms [*kg*]

`pycontrails.physics.units.longitude_distance_to_m(distance_degrees, latitude_mean)`

Convert longitude degrees distance between two points to cartesian distances in meters.

**Parameters**

- **distance\_degrees** (*ArrayScalarLike*) – longitude distance, [*deg*]

- **latitude\_mean** (*ArrayScalarLike*, *optional*) – mean latitude between longitude\_1 and longitude\_2, [deg]

**Returns**

*ArrayScalarLike* – cartesian distance along the longitude axis, [m]

pycontrails.physics.units.**m\_per\_s\_to\_knots**(*m\_per\_s*)

Convert speed from meters per second (m/s) to knots.

**Parameters**

**m\_per\_s** (*ArrayScalarLike*) – Speed, [ $m\ s^{-1}$ ]

**Returns**

*ArrayScalarLike* – Speed, [*knots*]

pycontrails.physics.units.**m\_to\_T\_isa**(*h*)

Calculate the ambient temperature (K) for a given altitude (m).

Assumes the ICAO standard atmosphere.

**Parameters**

**h** (*ArrayScalarLike*) – altitude, [m]

**Returns**

*ArrayScalarLike* – ICAO standard atmosphere ambient temperature, [K]

**References**

- [Wikipedia contributors, 2023]

**Notes**

See [https://en.wikipedia.org/wiki/International\\_Standard\\_Atmosphere](https://en.wikipedia.org/wiki/International_Standard_Atmosphere)

**See also:**

*m\_to\_pl*, *ft\_to\_pl*

pycontrails.physics.units.**m\_to\_ft**(*m*)

Convert length from meters to feet.

**Parameters**

**m** (*ArrayScalarLike*) – length, [m]

**Returns**

*ArrayScalarLike* – length, [ft]

pycontrails.physics.units.**m\_to\_latitude\_distance**(*distance\_m*)

Convert cartesian distance (meters) to differences in latitude degrees.

Small angle approximation for  $distance\_m \ll constants.radius\_earth$

**Parameters**

**distance\_m** (*ArrayScalarLike*) – cartesian distance along latitude axis, [m]

**Returns**

*ArrayScalarLike* – latitude distance, [deg]

`pycontrails.physics.units.m_to_longitude_distance(distance_m, latitude_mean)`

Convert cartesian distance (meters) to differences in longitude degrees.

Small angle approximation for `distance_m << constants.radius_earth`

**Parameters**

- **distance\_m** (*ArrayScalarLike*) – cartesian distance along longitude axis, [*m*]
- **latitude\_mean** (*ArrayScalarLike*) – mean latitude between `longitude_1` and `longitude_2`, [deg]

**Returns**

*ArrayScalarLike* – longitude distance, [deg]

`pycontrails.physics.units.m_to_pl(h)`

Convert from altitude (m) to pressure level (hPa).

**Parameters**

**h** (`npt.NDArray[np.float64]`) – altitude, [*m*]

**Returns**

`npt.NDArray[np.float64]` – pressure level, [*hPa*], [*mbar*]

**References**

- [Wikipedia contributors, 2023]

**Notes**

See [https://en.wikipedia.org/wiki/Barometric\\_formula](https://en.wikipedia.org/wiki/Barometric_formula)

**See also:**

*m\_to\_T\_isa*, *ft\_to\_pl*

`pycontrails.physics.units.mach_number_to_tas(mach_number, T)`

Calculate true airspeed from the Mach number at a specified ambient temperature.

**Parameters**

- **mach\_number** (`float` | `npt.NDArray[np.float64]`) – Mach number, [:math: *Ma*]
- **T** (`npt.NDArray[np.float64]`) – Ambient temperature, [*K*]

**Returns**

`npt.NDArray[np.float64]` – True airspeed, [*m s<sup>-1</sup>*]

**References**

- [Cumpsty and Heyes, 2015]

`pycontrails.physics.units.pl_to_ft(pl)`

Convert from pressure level (hPa) to altitude (ft).

Assumes the ICAO standard atmosphere.

**Parameters**

**pl** (*ArrayScalarLike*) – pressure level, [*hPa*], [*mbar*]



**Returns***ArrayScalarLike* – altitude, [*ft*]**See also:***pl\_to\_m*, *ft\_to\_pl*, *m\_to\_T\_isa*`pycontrails.physics.units.pl_to_m(pl)`

Convert from pressure level (hPa) to altitude (m).

Function is slightly different from the classical formula:  $\text{constants.T\_msl} / 0.0065) * (1 - (\text{pl\_pa} / \text{constants.p\_surface}) ** (1 / 5.255))$  in order to provide a mathematical inverse to *m\_to\_pl()*.

For low altitudes (below the tropopause), this implementation closely agrees to classical formula.

**Parameters****pl** (*ArrayLike*) – pressure level, [*hPa*], [*mbar*]**Returns***ArrayLike* – altitude, [*m*]**References**

- [Wikipedia contributors, 2023]

**Notes**See [https://en.wikipedia.org/wiki/Barometric\\_formula](https://en.wikipedia.org/wiki/Barometric_formula)**See also:***pl\_to\_ft*, *m\_to\_pl*, *m\_to\_T\_isa*`pycontrails.physics.units.radians_to_degrees(radians)`

Convert from radians to degrees.

**Parameters****radians** (*ArrayScalarLike*) – degrees values, []**Returns***ArrayScalarLike* – Radian values`pycontrails.physics.units.tas_to_mach_number(true_airspeed, T)`

Calculate Mach number from true airspeed at a specified ambient temperature.

**Parameters**

- **true\_airspeed** (*ArrayScalarLike*) – True airspeed, [ $m\ s^{-1}$ ]
- **T** (*ArrayScalarLike*) – Ambient temperature, [*K*]

**Returns***ArrayScalarLike* – Mach number, [:math: *Ma*]

## References

- [Cumpsty and Heyes, 2015]

## 11.5 Cache

|                                                                |                                                   |
|----------------------------------------------------------------|---------------------------------------------------|
| <code>DiskCacheStore</code> ([cache_dir, allow_clear])         | Cache that uses a folder on the local filesystem. |
| <code>GCPCacheStore</code> ([cache_dir, project, bucket, ...]) | Google Cloud Platform (Storage) Cache.            |

### 11.5.1 pycontrails.DiskCacheStore

**class** `pycontrails.DiskCacheStore`(*cache\_dir=None, allow\_clear=False*)

Bases: `CacheStore`

Cache that uses a folder on the local filesystem.

#### Parameters

- **allow\_clear** (*bool, optional*) – Allow this cache to be cleared using `clear()`. Defaults to `False`.
- **cache\_dir** (*str | pathlib.Path, optional*) – Root cache directory. By default, looks first for `PYCONTRAILS_CACHE_DIR` environment variable, then uses the OS specific `platformdirs.user_cache_dir()` function.

#### Examples

```
>>> from pycontrails import DiskCacheStore
>>> disk_cache = DiskCacheStore(cache_dir="cache", allow_clear=True)
>>> disk_cache.cache_dir
'cache'
```

```
>>> disk_cache.clear() # cleanup
```

```
__init__(cache_dir=None, allow_clear=False)
```

#### Methods

|                                                   |                                                               |
|---------------------------------------------------|---------------------------------------------------------------|
| <code>__init__</code> ([cache_dir, allow_clear])  |                                                               |
| <code>clear</code> ([cache_path])                 | Delete all files and folders within <code>cache_path</code> . |
| <code>exists</code> (cache_path)                  | Check if a path in cache exists.                              |
| <code>get</code> (cache_path)                     | Get data path from the local cache store.                     |
| <code>listdir</code> ([path])                     | List the contents of a directory in the cache.                |
| <code>path</code> (cache_path)                    | Return a full filepath in cache.                              |
| <code>put</code> (data_path[, cache_path])        | Save data to the local cache store.                           |
| <code>put_multiple</code> (data_path, cache_path) | Put multiple files into the cache at once.                    |

## Attributes

|                          |                                                      |
|--------------------------|------------------------------------------------------|
| <code>cache_dir</code>   |                                                      |
| <code>allow_clear</code> |                                                      |
| <code>size</code>        | Return the disk size (in MBytes) of the local cache. |

## allow\_clear

## cache\_dir

## clear(*cache\_path*=")

Delete all files and folders within `cache_path`.

If no `cache_path` is provided, this will clear the entire cache.

If `allow_clear` is set to `False`, this method will do nothing.

### Parameters

**cache\_path** (*str*, *optional*) – Path to subdirectory or file in cache

### Raises

**RuntimeError** – Raises a RuntimeError when `allow_clear` is set to `False`

## Examples

```
>>> from pycontrails import DiskCacheStore
>>> disk_cache = DiskCacheStore(cache_dir="cache", allow_clear=True)
```

```
>>> # Write some data to the cache
>>> disk_cache.put("README.md", "test/example.txt")
'test/example.txt'
```

```
>>> disk_cache.exists("test/example.txt")
True
```

```
>>> # clear a specific path
>>> disk_cache.clear("test/example.txt")
```

```
>>> # clear the whole cache
>>> disk_cache.clear()
```

## exists(*cache\_path*)

Check if a path in cache exists.

### Parameters

**cache\_path** (*str*) – Path to directory or file in cache

### Returns

`bool` – True if directory or file exists

## Examples

```
>>> from pycontrails import DiskCacheStore
>>> cache = DiskCacheStore(cache_dir="cache", allow_clear=True)
>>> cache.exists("file.nc")
False
```

### **get**(*cache\_path*)

Get data path from the local cache store.

Alias for *path()*

#### **Parameters**

**cache\_path** (*str*) – Cache path to retrieve

#### **Returns**

*str* – Returns the relative path in the cache to the stored file

## Examples

```
>>> from pycontrails import DiskCacheStore
>>> disk_cache = DiskCacheStore(cache_dir="cache", allow_clear=True)
>>>
>>> # returns a path
>>> disk_cache.get("test/file.md")
'cache/test/file.md'
```

### **listdir**(*path=""*)

List the contents of a directory in the cache.

#### **Parameters**

**path** (*str*) – Path to the directory to list

#### **Returns**

*list*[*str*] – List of files in the directory

### **path**(*cache\_path*)

Return a full filepath in cache.

#### **Parameters**

**cache\_path** (*str*) – string path or filepath to create in cache If parent directories do not exist, they will be created.

#### **Returns**

*str* – Full path string to subdirectory directory or object in cache directory

## Examples

```
>>> from pycontrails import DiskCacheStore
>>> cache = DiskCacheStore(cache_dir="cache", allow_clear=True)
>>> cache.path("file.nc")
'cache/file.nc'
```

```
>>> cache.clear() # cleanup
```

**put**(*data\_path*, *cache\_path*=None)

Save data to the local cache store.

### Parameters

- **data\_path** (str | pathlib.Path) – Path to data to cache.
- **cache\_path** (str | None, *optional*) – Path in cache store to save data Defaults to the same filename as *data\_path*

### Returns

str – Returns the relative path in the cache to the stored file

### Raises

**FileNotFoundError** – Raises if *data* is a string and a file is not found at the string

## Examples

```
>>> from pycontrails import DiskCacheStore
>>> disk_cache = DiskCacheStore(cache_dir="cache", allow_clear=True)
>>>
>>> # put a file directly
>>> disk_cache.put("README.md", "test/file.md")
'test/file.md'
```

**property size**

Return the disk size (in MBytes) of the local cache.

### Returns

float – Size of the disk cache store in MB

## Examples

```
>>> from pycontrails import DiskCacheStore
>>> cache = DiskCacheStore(cache_dir="cache", allow_clear=True)
>>> cache.size
0.0...
```

```
>>> cache.clear() # cleanup
```

## 11.5.2 pycontrails.GPCacheStore

```
class pycontrails.GPCacheStore(cache_dir="", project=None, bucket=None, disk_cache=None,
                               read_only=True, allow_clear=False, timeout=300, show_progress=False,
                               chunk_size=16777216)
```

Bases: [CacheStore](#)

Google Cloud Platform (Storage) Cache.

This class downloads files from Google Cloud Storage locally to a [DiskCacheStore](#) initialized with `cache_dir=".gcp"` to avoid re-downloading files. If the source files on GCP changes, the local mirror of the GCP DiskCacheStore must be cleared by initializing this class and running `clear_disk()`.

Note by default, GCP Cache Store is *read only*. When a `put()` is called and `read_only` is set to *True*, the cache will throw an `RuntimeError` error. Set `read_only` to *False* to enable writing to cache store.

### Parameters

- **cache\_dir** (*str, optional*) – Root object prefix within `bucket` Defaults to `PYCONTRAILS_CACHE_DIR` environment variable, or the root of the bucket. The full GCP URI (ie, “`gs://<MY_BUCKET>/<PREFIX>`”) can be used here.
- **project** (*str, \*optional\**) – GCP Project. Defaults to the current active project set in the `google-cloud-sdk` environment
- **bucket** (*str, optional*) – GCP Bucket to use for cache. Defaults to `PYCONTRAILS_CACHE_BUCKET` environment variable.
- **read\_only** (*bool, optional*) – Only enable reading from cache. Defaults to `True`.
- **allow\_clear** (*bool, optional*) – Allow this cache to be cleared using `clear()`. Defaults to `False`.
- **disk\_cache** ([DiskCacheStore](#), *optional*) – Specify a custom local disk cache store to mirror files. Defaults to `DiskCacheStore(cache_dir="{user_cache_dir}/.gcp/{bucket}")`
- **show\_progress** (*bool, optional*) – Show progress bar on cache `put()`. Defaults to `False`
- **chunk\_size** (*int, optional*) – Chunk size for uploads and downloads with progress. Set a larger size to see more granular progress, and set a smaller size for more optimal download speed. Chunk size must be a multiple of 262144 (ie, `10 * 262144`). Default value is `8 * 262144`, which will throttle fast download speeds.

### Examples

```
>>> from pycontrails import GPCacheStore
>>> cache = GPCacheStore(
...     bucket="contrails-301217-unit-test",
...     cache_dir="cache",
... )
>>> cache.cache_dir
'cache/'
>>> cache.bucket
'contrails-301217-unit-test'
```

```
__init__(cache_dir="", project=None, bucket=None, disk_cache=None, read_only=True,
         allow_clear=False, timeout=300, show_progress=False, chunk_size=16777216)
```

## Methods

|                                                          |                                                           |
|----------------------------------------------------------|-----------------------------------------------------------|
| <code>__init__([cache_dir, project, bucket, ...])</code> |                                                           |
| <code>clear_disk([cache_path])</code>                    | Clear the local disk cache mirror of the GCP Cache Store. |
| <code>exists(cache_path)</code>                          | Check if a path in cache exists.                          |
| <code>get(cache_path)</code>                             | Get data from the local cache store.                      |
| <code>gs_path(cache_path)</code>                         | Return a full Google Storage (gs://) URI to object.       |
| <code>listdir([path])</code>                             | List the contents of a directory in the cache.            |
| <code>path(cache_path)</code>                            | Return a full filepath in cache.                          |
| <code>put(data_path[, cache_path])</code>                | Save data to the GCP cache store.                         |
| <code>put_multiple(data_path, cache_path)</code>         | Put multiple files into the cache at once.                |

## Attributes

|                            |                                                      |
|----------------------------|------------------------------------------------------|
| <code>project</code>       |                                                      |
| <code>bucket</code>        |                                                      |
| <code>read_only</code>     |                                                      |
| <code>timeout</code>       |                                                      |
| <code>show_progress</code> |                                                      |
| <code>chunk_size</code>    |                                                      |
| <code>allow_clear</code>   |                                                      |
| <code>cache_dir</code>     |                                                      |
| <code>client</code>        | Handle to Google Cloud Storage client.               |
| <code>size</code>          | Return the disk size (in MBytes) of the local cache. |

### bucket

### chunk\_size

### clear\_disk(cache\_path="")

Clear the local disk cache mirror of the GCP Cache Store.

#### Parameters

**cache\_path** (*str*, *optional*) – Path in mirrored cache store. Passed into `_disk_clear.clear()`. By default, this method will clear the entire mirrored cache store.

## Examples

```
>>> from pycontrails import GCPCacheStore
>>> cache = GCPCacheStore(
...     bucket="contrails-301217-unit-test",
...     cache_dir="cache",
... )
>>> cache.clear_disk()
```

### property client

Handle to Google Cloud Storage client.

**Returns**

google.cloud.storage.Client – Handle to Google Cloud Storage client

### exists(*cache\_path*)

Check if a path in cache exists.

**Parameters**

**cache\_path** (*str*) – Path to directory or file in cache

**Returns**

*bool* – True if directory or file exists

## Examples

```
>>> from pycontrails import DiskCacheStore
>>> cache = DiskCacheStore(cache_dir="cache", allow_clear=True)
>>> cache.exists("file.nc")
False
```

### get(*cache\_path*)

Get data from the local cache store.

**Parameters**

**cache\_path** (*str*) – Path in cache store to get data

**Returns**

*str* – Returns path to downloaded local file

**Raises**

**ValueError** – Raises value error is *cache\_path* refers to a directory

## Examples

```
>>> import pathlib
>>> from pycontrails import GCPCacheStore
>>> cache = GCPCacheStore(
...     bucket="contrails-301217-unit-test",
...     cache_dir="cache",
...     read_only=False,
... )
```



```
>>> cache.put("README.md", "example/file.md")
'example/file.md'
```

```
>>> # returns a full path to local copy of the file
>>> path = cache.get("example/file.md")
>>> pathlib.Path(path).is_file()
True
```

```
>>> pathlib.Path(path).read_text()[17:69]
'Python library for modeling aviation climate impacts'
```

### **gs\_path**(cache\_path)

Return a full Google Storage (gs://) URI to object.

#### **Parameters**

**cache\_path** (str) – string path to object in cache

#### **Returns**

str – Google Storage URI (gs://) to object in cache

### **Examples**

```
>>> from pycontrails import GCPCacheStore
>>> cache = GCPCacheStore(
...     bucket="contrails-301217-unit-test",
...     cache_dir="cache",
... )
>>> cache.path("file.nc")
'cache/file.nc'
```

### **listdir**(path="")

List the contents of a directory in the cache.

#### **Parameters**

**path** (str) – Path to the directory to list

#### **Returns**

list[str] – List of files in the directory

### **path**(cache\_path)

Return a full filepath in cache.

#### **Parameters**

**cache\_path** (str) – string path or filepath to create in cache If parent directories do not exist, they will be created.

#### **Returns**

str – Full path string to subdirectory directory or object in cache directory

## Examples

```
>>> from pycontrails import DiskCacheStore
>>> cache = DiskCacheStore(cache_dir="cache", allow_clear=True)
>>> cache.path("file.nc")
'cache/file.nc'
```

```
>>> cache.clear() # cleanup
```

## project

**put**(*data\_path*, *cache\_path=None*)

Save data to the GCP cache store.

If *read\_only* is *True*, this method will return the path to the local disk cache store path.

### Parameters

- **data\_path** (*str* | *pathlib.Path*) – Data to save to GCP cache store.
- **cache\_path** (*str*, *optional*) – Path in cache store to save data. Defaults to the same filename as *data\_path*.

### Returns

*str* – Returns the path in the cache to the stored file

### Raises

- **RuntimeError** – Raises if *read\_only* is *True*
- **FileNotFoundError** – Raises if *data* is a string and a file is not found at the string

## Examples

```
>>> from pycontrails import GCPCacheStore
>>> cache = GCPCacheStore(
...     bucket="contrails-301217-unit-test",
...     cache_dir="cache",
...     read_only=False,
... )
```

```
>>> # put a file directly
>>> cache.put("README.md", "test/file.md")
'test/file.md'
```

## read\_only

## show\_progress

## property size

Return the disk size (in MBytes) of the local cache.

### Returns

*float* – Size of the disk cache store in MB

## Examples

```
>>> from pycontrails import DiskCacheStore
>>> cache = DiskCacheStore(cache_dir="cache", allow_clear=True)
>>> cache.size
0.0...
```

```
>>> cache.clear() # cleanup
```

timeout

## 11.6 Core

|                                 |                                                                             |
|---------------------------------|-----------------------------------------------------------------------------|
| <code>core.airports</code>      | Airport data support.                                                       |
| <code>core.cache</code>         | Pycontrails Caching Support.                                                |
| <code>core.coordinates</code>   | Coordinates utilities.                                                      |
| <code>core.datalib</code>       | Datalib utilities.                                                          |
| <code>core.fleet</code>         | A single data structure encompassing a sequence of <i>Flight</i> instances. |
| <code>core.flight</code>        | Flight Data Handling.                                                       |
| <code>core.fuel</code>          | Fuel data support.                                                          |
| <code>core.interpolation</code> | Interpolation utilities.                                                    |
| <code>core.met</code>           | Meteorology data models.                                                    |
| <code>core.met_var</code>       | Module containing core met variables.                                       |
| <code>core.models</code>        | Physical model data structures.                                             |
| <code>core.polygon</code>       | Algorithm support for grid to polygon conversion.                           |
| <code>core.vector</code>        | Lightweight data structures for vector paths.                               |

### 11.6.1 pycontrails.core.airports

Airport data support.

#### Module Attributes

|                                       |                                |
|---------------------------------------|--------------------------------|
| <code>OURAIRPORTS_DATABASE_URL</code> | URL for Our Airports database. |
|---------------------------------------|--------------------------------|

#### Functions

|                                                             |                                                                       |
|-------------------------------------------------------------|-----------------------------------------------------------------------|
| <code>distance_to_airports(airports, longitude, ...)</code> | Calculate the 3D distance from the waypoint to the provided airports. |
| <code>find_nearest_airport(airports, longitude, ...)</code> | Find airport nearest to the waypoints.                                |
| <code>global_airport_database([cachestore, ...])</code>     | Load and process global airport database from Our Airports.           |

```
pycontrails.core.airports.OURAIRPORTS_DATABASE_URL =  
'https://github.com/contrailcirrus/ourairports-data/raw/main/airports.csv'
```

URL for [Our Airports](#) database. Fork of the [ourairports-data](#) repository.

```
pycontrails.core.airports.distance_to_airports(airports, longitude, latitude, altitude)
```

Calculate the 3D distance from the waypoint to the provided airports.

#### Parameters

- **airports** (`pandas.DataFrame`) – Airport database in the format returned from `global_airport_database()`.
- **longitude** (`float`) – Waypoint longitude, [deg]
- **latitude** (`float`) – Waypoint latitude, [deg]
- **altitude** (`float`) – Waypoint altitude, [m]

#### Returns

`numpy.ndarray` – 3D distance from waypoint to airports, [m]

#### See also:

`geo.haversine()`

```
pycontrails.core.airports.find_nearest_airport(airports, longitude, latitude, altitude, *, bbox=2.0)
```

Find airport nearest to the waypoints.

#### Parameters

- **airports** (`pandas.DataFrame`) – Airport database in the format returned from `global_airport_database()`.
- **longitude** (`float`) – Waypoint longitude, [deg]
- **latitude** (`float`) – Waypoint latitude, [deg]
- **altitude** (`float`) – Waypoint altitude, [m]
- **bbox** (`float`) – Search airports within spatial bounding box of  $\pm$  `bbox` from the waypoint, [deg] Defaults to 2 deg

#### Returns

`str` – ICAO code of nearest airport. Returns `None` if no airport is found within `bbox`.

#### Notes

Function will first search for large airports around the waypoint vicinity. If none is found, it will search for medium and small airports around the waypoint vicinity.

The waypoint must be below 10,000 feet to increase the probability of identifying the correct airport.

```
pycontrails.core.airports.global_airport_database(cache_store=None, update_cache=False)
```

Load and process global airport database from [Our Airports](#).

The database includes coordinates and metadata for 74867 unique airports.

#### Parameters

- **cache\_store** (`cache.CacheStore` | `None`, *optional*) – Cache store for airport database. Defaults to `cache.DiskCacheStore`.
- **update\_cache** (`bool`, *optional*) – Force update to cached airports database.

**Returns**

`pandas.DataFrame` – Processed global airport database.  
Global airport database.

**Notes**

As of 2023 March 30, the global airport database contains:

| Airport Type   | Number |
|----------------|--------|
| small_airport  | 39327  |
| heliport       | 19039  |
| closed         | 10107  |
| medium_airport | 4753   |
| seaplane_base  | 1133   |
| large_airport  | 463    |
| balloonport    | 45     |

**References**

- [Megginson, 2023]

**11.6.2 pycontrails.core.cache**

Pycontrails Caching Support.

**Classes**

|                                                               |                                                                        |
|---------------------------------------------------------------|------------------------------------------------------------------------|
| <code>CacheStore()</code>                                     | Abstract cache storage class for storing staged and intermediate data. |
| <code>DiskCacheStore([cache_dir, allow_clear])</code>         | Cache that uses a folder on the local filesystem.                      |
| <code>GCPCacheStore([cache_dir, project, bucket, ...])</code> | Google Cloud Platform (Storage) Cache.                                 |

**class pycontrails.core.cache.CacheStore**

Bases: `ABC`

Abstract cache storage class for storing staged and intermediate data.

**allow\_clear**

**cache\_dir**

**abstract exists**(*cache\_path*)

Check if a path in cache exists.

**Parameters**

**cache\_path** (`str`) – Path to directory or file in cache

**Returns**

`bool` – True if directory or file exists

## Examples

```
>>> from pycontrails import DiskCacheStore
>>> cache = DiskCacheStore(cache_dir="cache", allow_clear=True)
>>> cache.exists("file.nc")
False
```

**abstract** `get(cache_path)`

Get data from cache.

**abstract** `listdir(path="")`

List the contents of a directory in the cache.

**Parameters**

**path** (`str`) – Path to the directory to list

**Returns**

`list[str]` – List of files in the directory

**abstract** `path(cache_path)`

Return a full filepath in cache.

**Parameters**

**cache\_path** (`str`) – string path or filepath to create in cache If parent directories do not exist, they will be created.

**Returns**

`str` – Full path string to subdirectory directory or object in cache directory

## Examples

```
>>> from pycontrails import DiskCacheStore
>>> cache = DiskCacheStore(cache_dir="cache", allow_clear=True)
>>> cache.path("file.nc")
'cache/file.nc'
```

```
>>> cache.clear() # cleanup
```

**abstract** `put(data, cache_path=None)`

Save data to cache.

**put\_multiple**(`data_path, cache_path`)

Put multiple files into the cache at once.

**Parameters**

- **data\_path** (`Sequence[str | pathlib.Path]`) – List of data files to cache. Each member is passed directly on to `put()`.
- **cache\_path** (`list[str]`) – List of cache paths corresponding to each element in the `data_path` list. Each member is passed directly on to `put()`.

**Returns**

`list[str]` – Returns a list of relative paths to the stored files in the cache

**abstract property size**

Return the disk size (in MBytes) of the local cache.

**Returns**

`float` – Size of the disk cache store in MB

**Examples**

```
>>> from pycontrails import DiskCacheStore
>>> cache = DiskCacheStore(cache_dir="cache", allow_clear=True)
>>> cache.size
0.0...
```

```
>>> cache.clear() # cleanup
```

**class** `pycontrails.core.cache.DiskCacheStore`(*cache\_dir=None, allow\_clear=False*)

Bases: `CacheStore`

Cache that uses a folder on the local filesystem.

**Parameters**

- **allow\_clear** (`bool`, *optional*) – Allow this cache to be cleared using `clear()`. Defaults to `False`.
- **cache\_dir** (`str` | `pathlib.Path`, *optional*) – Root cache directory. By default, looks first for `PYCONTRAILS_CACHE_DIR` environment variable, then uses the OS specific `platformdirs.user_cache_dir()` function.

**Examples**

```
>>> from pycontrails import DiskCacheStore
>>> disk_cache = DiskCacheStore(cache_dir="cache", allow_clear=True)
>>> disk_cache.cache_dir
'cache'
```

```
>>> disk_cache.clear() # cleanup
```

**allow\_clear****cache\_dir****clear**(*cache\_path=""*)

Delete all files and folders within `cache_path`.

If no `cache_path` is provided, this will clear the entire cache.

If `allow_clear` is set to `False`, this method will do nothing.

**Parameters**

**cache\_path** (`str`, *optional*) – Path to subdirectory or file in cache

**Raises**

**RuntimeError** – Raises a `RuntimeError` when `allow_clear` is set to `False`

## Examples

```
>>> from pycontrails import DiskCacheStore
>>> disk_cache = DiskCacheStore(cache_dir="cache", allow_clear=True)
```

```
>>> # Write some data to the cache
>>> disk_cache.put("README.md", "test/example.txt")
'test/example.txt'
```

```
>>> disk_cache.exists("test/example.txt")
True
```

```
>>> # clear a specific path
>>> disk_cache.clear("test/example.txt")
```

```
>>> # clear the whole cache
>>> disk_cache.clear()
```

### **exists**(*cache\_path*)

Check if a path in cache exists.

#### **Parameters**

**cache\_path** (*str*) – Path to directory or file in cache

#### **Returns**

*bool* – True if directory or file exists

## Examples

```
>>> from pycontrails import DiskCacheStore
>>> cache = DiskCacheStore(cache_dir="cache", allow_clear=True)
>>> cache.exists("file.nc")
False
```

### **get**(*cache\_path*)

Get data path from the local cache store.

Alias for *path*()

#### **Parameters**

**cache\_path** (*str*) – Cache path to retrieve

#### **Returns**

*str* – Returns the relative path in the cache to the stored file



## Examples

```
>>> from pycontrails import DiskCacheStore
>>> disk_cache = DiskCacheStore(cache_dir="cache", allow_clear=True)
>>>
>>> # returns a path
>>> disk_cache.get("test/file.md")
'cache/test/file.md'
```

### `listdir(path="")`

List the contents of a directory in the cache.

#### Parameters

**path** (`str`) – Path to the directory to list

#### Returns

`list[str]` – List of files in the directory

### `path(cache_path)`

Return a full filepath in cache.

#### Parameters

**cache\_path** (`str`) – string path or filepath to create in cache If parent directories do not exist, they will be created.

#### Returns

`str` – Full path string to subdirectory directory or object in cache directory

## Examples

```
>>> from pycontrails import DiskCacheStore
>>> cache = DiskCacheStore(cache_dir="cache", allow_clear=True)
>>> cache.path("file.nc")
'cache/file.nc'
```

```
>>> cache.clear() # cleanup
```

### `put(data_path, cache_path=None)`

Save data to the local cache store.

#### Parameters

- **data\_path** (`str` | `pathlib.Path`) – Path to data to cache.
- **cache\_path** (`str` | `None`, *optional*) – Path in cache store to save data Defaults to the same filename as `data_path`

#### Returns

`str` – Returns the relative path in the cache to the stored file

#### Raises

**FileNotFoundError** – Raises if `data` is a string and a file is not found at the string

## Examples

```
>>> from pycontrails import DiskCacheStore
>>> disk_cache = DiskCacheStore(cache_dir="cache", allow_clear=True)
>>>
>>> # put a file directly
>>> disk_cache.put("README.md", "test/file.md")
'test/file.md'
```

### property size

Return the disk size (in MBytes) of the local cache.

#### Returns

`float` – Size of the disk cache store in MB

## Examples

```
>>> from pycontrails import DiskCacheStore
>>> cache = DiskCacheStore(cache_dir="cache", allow_clear=True)
>>> cache.size
0.0...
```

```
>>> cache.clear() # cleanup
```

```
class pycontrails.core.cache.GPCCacheStore(cache_dir="", project=None, bucket=None,
                                           disk_cache=None, read_only=True, allow_clear=False,
                                           timeout=300, show_progress=False,
                                           chunk_size=16777216)
```

Bases: `CacheStore`

Google Cloud Platform (Storage) Cache.

This class downloads files from Google Cloud Storage locally to a `DiskCacheStore` initialized with `cache_dir=".gcp"` to avoid re-downloading files. If the source files on GCP changes, the local mirror of the GCP `DiskCacheStore` must be cleared by initializing this class and running `clear_disk()`.

Note by default, GCP Cache Store is *read only*. When a `put()` is called and `read_only` is set to `True`, the cache will throw an `RuntimeError` error. Set `read_only` to `False` to enable writing to cache store.

#### Parameters

- **cache\_dir** (`str`, *optional*) – Root object prefix within `bucket` Defaults to `PYCONTRAILS_CACHE_DIR` environment variable, or the root of the bucket. The full GCP URI (ie, “`gs://<MY_BUCKET>/<PREFIX>`”) can be used here.
- **project** (`str`, *\*optional\**) – GCP Project. Defaults to the current active project set in the `google-cloud-sdk` environment
- **bucket** (`str`, *optional*) – GCP Bucket to use for cache. Defaults to `PYCONTRAILS_CACHE_BUCKET` environment variable.
- **read\_only** (`bool`, *optional*) – Only enable reading from cache. Defaults to `True`.
- **allow\_clear** (`bool`, *optional*) – Allow this cache to be cleared using `clear()`. Defaults to `False`.

- **disk\_cache** (*DiskCacheStore*, *optional*) – Specify a custom local disk cache store to mirror files. Defaults to `DiskCacheStore(cache_dir="{user_cache_dir}/.gcp/{bucket}")`
- **show\_progress** (*bool*, *optional*) – Show progress bar on cache `put()`. Defaults to `False`
- **chunk\_size** (*int*, *optional*) – Chunk size for uploads and downloads with progress. Set a larger size to see more granular progress, and set a smaller size for more optimal download speed. Chunk size must be a multiple of 262144 (ie,  $10 * 262144$ ). Default value is  $8 * 262144$ , which will throttle fast download speeds.

## Examples

```
>>> from pycontrails import GPCCacheStore
>>> cache = GPCCacheStore(
...     bucket="contrails-301217-unit-test",
...     cache_dir="cache",
... )
>>> cache.cache_dir
'cache/'
>>> cache.bucket
'contrails-301217-unit-test'
```

**bucket**

**chunk\_size**

**clear\_disk**(*cache\_path=""*)

Clear the local disk cache mirror of the GCP Cache Store.

### Parameters

**cache\_path** (*str*, *optional*) – Path in mirrored cache store. Passed into `_disk_clear.clear()`. By default, this method will clear the entire mirrored cache store.

## Examples

```
>>> from pycontrails import GPCCacheStore
>>> cache = GPCCacheStore(
...     bucket="contrails-301217-unit-test",
...     cache_dir="cache",
... )
>>> cache.clear_disk()
```

**property client**

Handle to Google Cloud Storage client.

### Returns

`google.cloud.storage.Client` – Handle to Google Cloud Storage client

**exists**(*cache\_path*)

Check if a path in cache exists.

### Parameters

**cache\_path** (*str*) – Path to directory or file in cache

**Returns**`bool` – True if directory or file exists**Examples**

```
>>> from pycontrails import DiskCacheStore
>>> cache = DiskCacheStore(cache_dir="cache", allow_clear=True)
>>> cache.exists("file.nc")
False
```

**get**(*cache\_path*)

Get data from the local cache store.

**Parameters**`cache_path` (`str`) – Path in cache store to get data**Returns**`str` – Returns path to downloaded local file**Raises****ValueError** – Raises value error if `cache_path` refers to a directory**Examples**

```
>>> import pathlib
>>> from pycontrails import GCPCacheStore
>>> cache = GCPCacheStore(
...     bucket="contrails-301217-unit-test",
...     cache_dir="cache",
...     read_only=False,
... )
```

```
>>> cache.put("README.md", "example/file.md")
'example/file.md'
```

```
>>> # returns a full path to local copy of the file
>>> path = cache.get("example/file.md")
>>> pathlib.Path(path).is_file()
True
```

```
>>> pathlib.Path(path).read_text()[17:69]
'Python library for modeling aviation climate impacts'
```

**gs\_path**(*cache\_path*)Return a full Google Storage (`gs://`) URI to object.**Parameters**`cache_path` (`str`) – string path to object in cache**Returns**`str` – Google Storage URI (`gs://`) to object in cache

## Examples

```
>>> from pycontrails import GCPCacheStore
>>> cache = GCPCacheStore(
...     bucket="contrails-301217-unit-test",
...     cache_dir="cache",
... )
>>> cache.path("file.nc")
'cache/file.nc'
```

### `listdir(path="")`

List the contents of a directory in the cache.

#### Parameters

**path** (`str`) – Path to the directory to list

#### Returns

`list[str]` – List of files in the directory

### `path(cache_path)`

Return a full filepath in cache.

#### Parameters

**cache\_path** (`str`) – string path or filepath to create in cache If parent directories do not exist, they will be created.

#### Returns

`str` – Full path string to subdirectory directory or object in cache directory

## Examples

```
>>> from pycontrails import DiskCacheStore
>>> cache = DiskCacheStore(cache_dir="cache", allow_clear=True)
>>> cache.path("file.nc")
'cache/file.nc'
```

```
>>> cache.clear() # cleanup
```

## project

### `put(data_path, cache_path=None)`

Save data to the GCP cache store.

If `read_only` is `True`, this method will return the path to the local disk cache store path.

#### Parameters

- **data\_path** (`str` | `pathlib.Path`) – Data to save to GCP cache store.
- **cache\_path** (`str`, *optional*) – Path in cache store to save data. Defaults to the same filename as `data_path`.

#### Returns

`str` – Returns the path in the cache to the stored file

#### Raises

- `RuntimeError` – Raises if `read_only` is `True`

- **FileNotFoundError** – Raises if data is a string and a file is not found at the string

### Examples

```
>>> from pycontrails import GCPCacheStore
>>> cache = GCPCacheStore(
...     bucket="contrails-301217-unit-test",
...     cache_dir="cache",
...     read_only=False,
... )
```

```
>>> # put a file directly
>>> cache.put("README.md", "test/file.md")
'test/file.md'
```

**read\_only**

**show\_progress**

**property size**

Return the disk size (in MBytes) of the local cache.

**Returns**

`float` – Size of the disk cache store in MB

### Examples

```
>>> from pycontrails import DiskCacheStore
>>> cache = DiskCacheStore(cache_dir="cache", allow_clear=True)
>>> cache.size
0.0...
```

```
>>> cache.clear() # cleanup
```

**timeout**

## 11.6.3 pycontrails.core.coordinates

Coordinates utilities.

### Functions

---

|                                                      |                                                                      |
|------------------------------------------------------|----------------------------------------------------------------------|
| <code>intersect_domain(domain, request)</code>       | Return boolean mask of request that are within the bounds of domain. |
| <code>slice_domain(domain, request[, buffer])</code> | Return slice of domain containing coordinates overlapping request.   |

---

`pycontrails.core.coordinates.intersect_domain(domain, request)`

Return boolean mask of `request` that are within the bounds of `domain`.

#### Parameters

- **domain** (`numpy.ndarray`) – Full set of domain values
- **request** (`numpy.ndarray`) – Full set of requested values

#### Returns

`numpy.ndarray` – Boolean array of `request` values within the bounds of `domain`

#### Raises

**ValueError** – Raises a `ValueError` when `domain` has all nan values.

### Examples

```
>>> domain = np.array([3.0, 4.0, 2.0])
>>> request = np.arange(1.0, 6.0)
>>> intersect_domain(domain, request)
array([False,  True,  True,  True, False])
```

```
>>> domain = np.array([3.0, np.nan, np.nan])
>>> request = np.arange(1.0, 6.0)
>>> intersect_domain(domain, request)
array([False, False,  True, False, False])
```

`pycontrails.core.coordinates.slice_domain(domain, request, buffer=(0.0, 0.0))`

Return slice of `domain` containing coordinates overlapping `request`.

Computes index-based slice (to be used with `xarray.Dataset.isel()` method) as opposed to value-based slice.

Returns `slice(None, None)` when `domain` has a length  $\leq 2$  or the `request` has all nan values.

Changed in version 0.24.1: The returned slice is the minimum index-based slice that contains the requested coordinates. In other words, it's now possible for `domain[s1][0]` to equal `min(request)` where `s1` is the output of this function. Previously, we were guaranteed that `domain[s1][0]` would be less than `min(request)`.

#### Parameters

- **domain** (`numpy.ndarray`) – Full set of domain values
- **request** (`npt.ArrayLike`) – Requested values. Only the `nanmin` and `nanmax` values are considered.
- **buffer** (`tuple[float | np.timedelta64, float | np.timedelta64]`, *optional*) – Extend the domain past the requested coordinates by `buffer[0]` on the low side and `buffer[1]` on the high side. Units of `buffer` must be the same as `domain`.

#### Returns

`slice` – Slice object for slicing out encompassing, or nearest, domain values

#### Raises

**ValueError** – Raises a `ValueError` when `domain` has all nan values.

## Examples

```
>>> domain = np.arange(-180, 180, 0.25)
```

```
>>> # Call with request as np.array
>>> request = np.linspace(-20, 20, 100)
>>> slice_domain(domain, request)
slice(640, 801, None)
```

```
>>> # Call with request as tuple
>>> request = -20, 20
>>> slice_domain(domain, request)
slice(640, 801, None)
```

```
>>> # Call with a buffer
>>> request = -16, 13
>>> buffer = 4, 7
>>> slice_domain(domain, request, buffer)
slice(640, 801, None)
```

```
>>> # Call with request as a single number
>>> request = -20
>>> slice_domain(domain, request)
slice(640, 641, None)
```

```
>>> request = -19.9
>>> slice_domain(domain, request)
slice(640, 642, None)
```

## 11.6.4 pycontrails.core.datalib

Datalib utilities.

### Module Attributes

|                               |                                                              |
|-------------------------------|--------------------------------------------------------------|
| <code>NETCDF_ENGINE</code>    | NetCDF engine to use for parsing netcdf files                |
| <code>DEFAULT_CHUNKS</code>   | Default chunking strategy when opening datasets with xarray  |
| <code>OPEN_IN_PARALLEL</code> | Whether to open multi-file datasets in parallel              |
| <code>OPEN_WITH_LOCK</code>   | Whether to use file locking when opening multi-file datasets |



## Functions

|                                                            |                                                                                               |
|------------------------------------------------------------|-----------------------------------------------------------------------------------------------|
| <code>parse_grid(grid, supported)</code>                   | Parse input grid spacing.                                                                     |
| <code>parse_pressure_levels(pressure_levels[, ...])</code> | Check input pressure levels are consistent type and ensure levels exist in ECMWF data source. |
| <code>parse_timesteps(time[, freq])</code>                 | Parse time input into set of time steps.                                                      |
| <code>parse_variables(variables, supported)</code>         | Parse input variables.                                                                        |
| <code>round_hour(time, hour)</code>                        | Round time to the nearest whole hour before input time.                                       |
| <code>validate_timestep_freq(freq, datasource_freq)</code> | Check that input timestep frequency is compatible with the data source timestep frequency.    |

## Classes

|                                                    |                                                       |
|----------------------------------------------------|-------------------------------------------------------|
| <code>MetDataSource(time, variables[, ...])</code> | Abstract class for wrapping meteorology data sources. |
|----------------------------------------------------|-------------------------------------------------------|

```
pycontrails.core.datalib.DEFAULT_CHUNKS = {'time': 1}
```

Default chunking strategy when opening datasets with xarray

```
class pycontrails.core.datalib.MetDataSource(time, variables, pressure_levels=-1, paths=None,
                                             grid=None, **kwargs)
```

Bases: [ABC](#)

Abstract class for wrapping meteorology data sources.

**abstract** `cache_dataset(dataset)`

Cache data from data source.

**Parameters**

**dataset** ([xarray.Dataset](#)) – Dataset loaded from remote API or local files. The dataset must have the same format as the original data source API or files.

**cachestore**

Cache store for intermediates while processing data source. If None, cache is turned off.

**abstract** `create_cachepath(t)`

Return cachepath to local data file based on datetime.

**Parameters**

**t** ([datetime](#)) – Datetime of datafile

**Returns**

`str` – Path to cached data file

**download(\*\*xr\_kwargs)**

Confirm all data files are downloaded and available locally in the `cachestore`.

**Parameters**

**\*\*xr\_kwargs** – Passed into `xarray.open_dataset()` via `is_datafile_cached()`.

**abstract** `download_dataset(times)`

Download data from data source for input times.

**Parameters**

**times** (`list[datetime]`) – List of datetimes to download a store in cache

**grid**

Lat / Lon grid spacing

**property hash**

Generate a unique hash for this datasource.

**Returns**

`str` – Unique hash for met instance (sha1)

**is\_datafile\_cached(*t*, *\*\*xr\_kwargs*)**

Check datafile defined by datetime for variables and pressure levels in class.

If using a cloud cache store (i.e. `cache.GPCPCacheStore`), this is where the datafile will be mirrored to a local file for access.

**Parameters**

- `t` (`datetime`) – Datetime of datafile
- `**xr_kwargs` (Any) – Additional kwargs passed directly to `xarray.open_mfdataset()` when opening files. By default, the following values are used if not specified:
  - `chunks`: {"time": 1}
  - `engine`: "netcdf4"
  - `parallel`: True

**Returns**

`bool` – True if data file exists for datetime with all variables and pressure levels, False otherwise

**property is\_single\_level**

Return True if the datasource is single level data.

New in version 0.50.0.

**list\_timesteps\_cached(*\*\*xr\_kwargs*)**

Get a list of data files available locally in the `cachestore`.

**Parameters**

`**xr_kwargs` – Passed into `xarray.open_dataset()` via `is_datafile_cached()`.

**list\_timesteps\_not\_cached(*\*\*xr\_kwargs*)**

Get a list of data files not available locally in the `cachestore`.

**Parameters**

`**xr_kwargs` – Passed into `xarray.open_dataset()` via `is_datafile_cached()`.

**open\_dataset(*disk\_paths*, *\*\*xr\_kwargs*)**

Open multi-file dataset in xarray.

**Parameters**

- `disk_paths` (`str` | `list[str]` | `pathlib.Path` | `list[pathlib.Path]`) – list of string paths to local files to open
- `**xr_kwargs` (Any) – Additional kwargs passed directly to `xarray.open_mfdataset()` when opening files. By default, the following values are used if not specified:
  - `chunks`: {"time": 1}
  - `engine`: "netcdf4"

- parallel: False
- lock: False

**Returns**

`xarray.Dataset` – Open xarray dataset

**abstract open\_metdataset**(*dataset=None, xr\_kwargs=None, \*\*kwargs*)

Open MetDataset from data source.

This method should download / load any required datafiles and returns a MetDataset of the multi-file dataset opened by xarray.

**Parameters**

- **dataset** (`xr.Dataset` | `None`, *optional*) – Input `xr.Dataset` loaded manually. The dataset must have the same format as the original data source API or files.
- **xr\_kwargs** (`dict[str, Any]` | `None`, *optional*) – Dictionary of keyword arguments passed into `xarray.open_mfdataset()` when opening files. Examples include “chunks”, “engine”, “parallel”, etc. Ignored if dataset is input.
- **\*\*kwargs** (`Any`) – Keyword arguments passed through directly into MetDataset constructor.

**Returns**

`MetDataset` – Meteorology dataset

**See also:**

`xarray.open_mfdataset()`

**paths**

Path to local source files to load. Set to the paths of files cached in `cachestore` if no paths input is provided on init.

**property pressure\_level\_variables**

Parameters available from data source.

**Returns**

`list[MetVariable]` | `None` – List of MetVariable available in datasource

**pressure\_levels**

List of pressure levels. Set to [-1] for data without level coordinate. Use `parse_pressure_levels()` to handle PressureLevelInput.

**abstract set\_metadata(ds)**

Set met source metadata on `ds.attrs`.

This is called within the `open_metdataset()` method to set metadata on the returned MetDataset instance.

**Parameters**

**ds** (`xr.Dataset` | `MetDataset`) – Dataset to set metadata on. Mutated in place.

**property single\_level\_variables**

Parameters available from data source.

**Returns**

`list[MetVariable]` | `None` – List of MetVariable available in datasource

**property supported\_pressure\_levels**

Pressure levels available from datasource.

**Returns**

`list[int] | None` – List of integer pressure levels for class. If None, no pressure level information available for class.

**property supported\_variables**

Parameters available from data source.

**Returns**

`list[MetVariable] | None` – List of MetVariable available in datasource

**timesteps**

List of individual timesteps from data source derived from `time` Use `parse_time()` to handle TimeInput.

**property variable\_shortnames**

Return a list of variable short names.

**Returns**

`list[str]` – Lst of variable short names.

**property variable\_standardnames**

Return a list of variable standard names.

**Returns**

`list[str]` – Lst of variable standard names.

**variables**

Variables requested from data source Use `parse_variables()` to handle VariableInput.

`pycontrails.core.datalib.NETCDF_ENGINE = 'netcdf4'`

NetCDF engine to use for parsing netcdf files

`pycontrails.core.datalib.OPEN_IN_PARALLEL = False`

Whether to open multi-file datasets in parallel

`pycontrails.core.datalib.OPEN_WITH_LOCK = False`

Whether to use file locking when opening multi-file datasets

`pycontrails.core.datalib.parse_grid(grid, supported)`

Parse input grid spacing.

**Parameters**

- **grid** (`float`) – Input grid float
- **supported** (`Sequence[float]`) – Sequence of support grid values

**Returns**

`float` – Parsed grid spacing

**Raises**

**ValueError** – Raises ValueError when grid is not in supported

`pycontrails.core.datalib.parse_pressure_levels(pressure_levels, supported=None)`

Check input pressure levels are consistent type and ensure levels exist in ECMWF data source.

Changed in version 0.50.0: The returned pressure levels are now sorted. Pressure levels must be unique. Raises ValueError if pressure levels have mixed signs.

**Parameters**

- **pressure\_levels** (`PressureLevelInput`) – Input pressure levels for data, in hPa (mbar) Set to [-1] to represent surface level.
- **supported** (`list[int]`, *optional*) – List of supported pressures levels in data source

**Returns**

`list[int]` – List of integer pressure levels supported by ECMWF data source

**Raises**

**ValueError** – Raises ValueError if pressure level is not supported by ECMWF data source

`pycontrails.core.datalib.parse_timesteps(time, freq='1h')`

Parse time input into set of time steps.

If input time is length 2, this creates a range of equally spaced time points between [start, end] with interval freq.

**Parameters**

- **time** (`TimeInput | None`) – Input datetime(s) specifying the time or time range of the data [start, end]. Either a single datetime-like or tuple of datetime-like with the first value the start of the date range and second value the end of the time range. Input values can be any type compatible with `pandas.to_datetime()`.
- **freq** (`str | None`, *optional*) – Timestep interval in range. See [https://pandas.pydata.org/pandas-docs/stable/user\\_guide/timeseries.html#timeseries-offset-aliases](https://pandas.pydata.org/pandas-docs/stable/user_guide/timeseries.html#timeseries-offset-aliases) for a list of frequency aliases. If None, returns input *time* as a list. Defaults to “1h”.

**Returns**

`list[datetime]` – List of unique datetimes. If input *time* is None, returns an empty list

**Raises**

**ValueError** – Raises when the time has len > 2 or when time elements fail to be parsed with `pd.to_datetime`

`pycontrails.core.datalib.parse_variables(variables, supported)`

Parse input variables.

Changed in version 0.50.0: The output is no longer copied. Each `MetVariable` is a frozen dataclass, so copying is unnecessary.

**Parameters**

- **variables** (`VariableInput`) – Variable name, or sequence of variable names. i.e. "air\_temperature", ["air\_temperature, relative\_humidity"], [130], [AirTemperature], [[EastwardWind, NorthwardWind]] If an element is a list of `MetVariable`, the first `MetVariable` that is supported will be chosen.
- **supported** (`list[MetVariable]`) – Supported `MetVariable`.

**Returns**

`list[MetVariable]` – List of `MetVariable`

**Raises**

**ValueError** – Raises ValueError if variable is not supported

`pycontrails.core.datalib.round_hour(time, hour)`

Round time to the nearest whole hour before input time.

**Parameters**

- **time** (`datetime`) – Input time
- **hour** (`int`) – Hour to round down time

**Returns**

datetime – Rounded time

**Raises**

**ValueError** – Description

`pycontrails.core.datalib.validate_timestep_freq(freq, datasource_freq)`

Check that input timestep frequency is compatible with the data source timestep frequency.

A data source timestep frequency of 1 hour allows input timestep frequencies of 1 hour, 2 hours, 3 hours, etc., but not 1.5 hours or 30 minutes.

**Parameters**

- **freq** (*str*) – Input timestep frequency
- **datasource\_freq** (*str*) – Datasource timestep frequency

**Returns**

bool – True if the input timestep frequency is an even multiple of the data source timestep frequency.

## 11.6.5 pycontrails.core.fleet

A single data structure encompassing a sequence of `Flight` instances.

### Classes

|                                                                 |                                                                         |
|-----------------------------------------------------------------|-------------------------------------------------------------------------|
| <code>Fleet</code> ([data, longitude, latitude, altitude, ...]) | Data structure for holding a sequence of <code>Flight</code> instances. |
|-----------------------------------------------------------------|-------------------------------------------------------------------------|

```
class pycontrails.core.fleet.Fleet(data=None, *, longitude=None, latitude=None, altitude=None,
                                  altitude_ft=None, level=None, time=None, attrs=None, copy=True,
                                  fuel=None, fl_attrs=None, **attrs_kwargs)
```

Bases: `Flight`

Data structure for holding a sequence of `Flight` instances.

Flight waypoints are merged into a single `Flight`-like object.

```
clean_and_resample(freq='1min', fill_method='geodesic', geodesic_threshold=100000.0,
                    nominal_rocd=0.0, kernel_size=17, cruise_threshold=120, force_filter=False,
                    drop=True, keep_original_index=False, climb_descend_at_end=False)
```

Resample and (possibly) filter a flight trajectory.

Waypoints are resampled according to the frequency `freq`. If the original flight data has a short sampling period, `filter_altitude` will also be called to clean the data. Large gaps in trajectories may be interpolated as step climbs through `_altitude_interpolation`.

**Parameters**

- **freq** (*str, optional*) – Resampling frequency, by default “1min”
- **fill\_method** ({“geodesic”, “linear”}, *optional*) – Choose between “geodesic” and “linear”, by default “geodesic”. In geodesic mode, large gaps between waypoints are filled with geodesic interpolation and small gaps are filled with linear interpolation. In linear mode, all gaps are filled with linear interpolation.

- **geodesic\_threshold** (*float, optional*) – Threshold for geodesic interpolation, [*m*]. If the distance between consecutive waypoints is under this threshold, values are interpolated linearly.
- **nominal\_rocd** (*float, optional*) – Nominal rate of climb / descent for aircraft type. Defaults to `constants.nominal_rocd`.
- **kernel\_size** (*int, optional*) – Passed directly to `scipy.signal.medfilt()`, by default 11. Passed also to `scipy.signal.medfilt()`
- **cruise\_theshold** (*float, optional*) – Minimal length of time, in seconds, for a flight to be in cruise to apply median filter
- **force\_filter** (*bool, optional*) – If set to true, meth:*filter\_altitude* will always be called. otherwise, it will only be called if the flight has a median sample period under 10 seconds
- **drop** (*bool, optional*) – Drop any columns that are not resampled and filled. Defaults to True, dropping all keys outside of “time”, “latitude”, “longitude” and “altitude”. If set to False, the extra keys will be kept but filled with nan or None values, depending on the data type.
- **keep\_original\_index** (*bool, optional*) – Keep the original index of the Flight in addition to the new resampled index. Defaults to False. .. versionadded:: 0.45.2
- **climb\_or\_descend\_at\_end** (*bool*) – If true, the climb or descent will be placed at the end of each segment rather than the start. Default is false (climb or descent immediately).

**Returns***Flight* – Filled Flight**copy**(*\*\*kwargs*)

Return a copy of this VectorDatasetType class.

**Parameters****\*\*kwargs** (Any) – Additional keyword arguments passed into the constructor of the returned class.**Returns**

VectorDatasetType – Copy of class

**filter**(*mask, copy=True, \*\*kwargs*)

Filter data according to a boolean array mask.

Entries corresponding to `mask == True` are kept.**Parameters**

- **mask** (`npt.NDArray[np.bool_]`) – Boolean array with compatible shape.
- **copy** (*bool, optional*) – Copy data on filter. Defaults to True. See [numpy best practices](#) for insight into whether copy is appropriate.
- **\*\*kwargs** (Any) – Additional keyword arguments passed into the constructor of the returned class.

**Returns**

VectorDatasetType – Containing filtered data

**Raises****TypeError** – If mask is not a boolean array.**final\_waypoints**

**fl\_attrs**

**classmethod** `from_seq(seq, broadcast_numeric=True, copy=True, attrs=None)`

Instantiate a *Fleet* instance from an iterable of *Flight*.

Changed in version 0.49.3: Empty flights are now filtered out before concatenation.

**Parameters**

- `seq` (`Iterable[Flight]`) – An iterable of *Flight* instances.
- `broadcast_numeric` (`bool, optional`) – If `True`, broadcast numeric attributes to data variables.
- `copy` (`bool, optional`) – If `True`, make copy of each flight instance in `seq`.
- `attrs` (`dict[str, Any] | None, optional`) – Global attribute to attach to instance.

**Returns**

*Fleet* – A *Fleet* instance made from concatenating the *Flight* instances in `seq`. The fuel type is taken from the first *Flight* in `seq`.

**property** `max_distance_gap`

Return maximum distance gap between waypoints along flight trajectory.

Distance is calculated based on WGS84 geodesic.

**Returns**

`float` – Maximum distance between waypoints, [*m*]

**Raises**

`NotImplementedError` – Raises when `attr:attrs["crs"]` is not EPSG:4326

**Examples**

```
>>> import numpy as np
>>> fl = Flight(
...     longitude=np.linspace(20, 30, 200),
...     latitude=np.linspace(40, 30, 200),
...     altitude=11000 * np.ones(200),
...     time=pd.date_range('2021-01-01T12', '2021-01-01T14', periods=200),
... )
>>> fl.max_distance_gap
7391.27...
```

**property** `n_flights`

Return number of distinct flights.

**Returns**

`int` – Number of flights

**resample\_and\_fill(\*args, \*\*kwargs)**

Resample and fill flight trajectory with geodesics and linear interpolation.

Waypoints are resampled according to the frequency `freq`. Values for data columns `longitude`, `latitude`, and `altitude` are interpolated.

Resampled waypoints will include all multiples of `freq` between the flight start and end time. For example, when resampling to a frequency of 1 minute, a flight that starts at 2020/1/1 00:00:59 and ends at 2020/1/1



00:01:01 will return a single waypoint at 2020/1/1 00:01:00, whereas a flight that starts at 2020/1/1 00:01:01 and ends at 2020/1/1 00:01:59 will return an empty flight.

### Parameters

- **freq** (*str, optional*) – Resampling frequency, by default “1min”
- **fill\_method** ({“geodesic”, “linear”}, *optional*) – Choose between “geodesic” and “linear”, by default “geodesic”. In geodesic mode, large gaps between waypoints are filled with geodesic interpolation and small gaps are filled with linear interpolation. In linear mode, all gaps are filled with linear interpolation.
- **geodesic\_threshold** (*float, optional*) – Threshold for geodesic interpolation, [*m*]. If the distance between consecutive waypoints is under this threshold, values are interpolated linearly.
- **nominal\_rocd** (*float | None, optional*) – Nominal rate of climb / descent for aircraft type. Defaults to `constants.nominal_rocd`.
- **drop** (*bool, optional*) – Drop any columns that are not resampled and filled. Defaults to True, dropping all keys outside of “time”, “latitude”, “longitude” and “altitude”. If set to False, the extra keys will be kept but filled with nan or None values, depending on the data type.
- **keep\_original\_index** (*bool, optional*) – Keep the original index of the Flight in addition to the new resampled index. Defaults to False. .. versionadded:: 0.45.2
- **climb\_or\_descend\_at\_end** (*bool*) – If true, the climb or descent will be placed at the end of each segment rather than the start. Default is false (climb or descent immediately).

### Returns

*Flight* – Filled Flight

### Raises

**ValueError** – Unknown fill\_method

### Examples

```
>>> from datetime import datetime
>>> import pandas as pd
```

```
>>> df = pd.DataFrame()
>>> df['longitude'] = [0, 0, 50]
>>> df['latitude'] = 0
>>> df['altitude'] = 0
>>> df['time'] = [datetime(2020, 1, 1, h) for h in range(3)]
```

```
>>> fl = Flight(df)
>>> fl.dataframe
  longitude  latitude  altitude          time
0         0         0.0        0.0  0.0 2020-01-01 00:00:00
1         1         0.0        0.0  0.0 2020-01-01 01:00:00
2         2        50.0        0.0  0.0 2020-01-01 02:00:00
```

```
>>> fl.resample_and_fill('10min').dataframe # resample with 10 minute frequency
  longitude  latitude  altitude          time
```

(continues on next page)

(continued from previous page)

|    |           |     |     |                     |
|----|-----------|-----|-----|---------------------|
| 0  | 0.000000  | 0.0 | 0.0 | 2020-01-01 00:00:00 |
| 1  | 0.000000  | 0.0 | 0.0 | 2020-01-01 00:10:00 |
| 2  | 0.000000  | 0.0 | 0.0 | 2020-01-01 00:20:00 |
| 3  | 0.000000  | 0.0 | 0.0 | 2020-01-01 00:30:00 |
| 4  | 0.000000  | 0.0 | 0.0 | 2020-01-01 00:40:00 |
| 5  | 0.000000  | 0.0 | 0.0 | 2020-01-01 00:50:00 |
| 6  | 0.000000  | 0.0 | 0.0 | 2020-01-01 01:00:00 |
| 7  | 8.333333  | 0.0 | 0.0 | 2020-01-01 01:10:00 |
| 8  | 16.666667 | 0.0 | 0.0 | 2020-01-01 01:20:00 |
| 9  | 25.000000 | 0.0 | 0.0 | 2020-01-01 01:30:00 |
| 10 | 33.333333 | 0.0 | 0.0 | 2020-01-01 01:40:00 |
| 11 | 41.666667 | 0.0 | 0.0 | 2020-01-01 01:50:00 |
| 12 | 50.000000 | 0.0 | 0.0 | 2020-01-01 02:00:00 |

**segment\_angle()**

Calculate sine and cosine for the angle between each segment and the longitudinal axis.

This is different from the usual navigational angle between two points known as *bearing*.

*Bearing* in 3D spherical coordinates is referred to as *azimuth*.

**Returns**

`npt.NDArray[np.float64]`, `npt.NDArray[np.float64]` – Returns  $\sin(a)$ ,  $\cos(a)$ , where  $a$  is the angle between the segment and the longitudinal axis. The final values are of both arrays are `np.nan`.

**See also:**

`geo.segment_angle()`, `units.heading_to_longitudinal_angle()`, `segment_azimuth()`, `geo.forward_azimuth()`

**Examples**

```
>>> from pycontrails import Flight
>>> fl = Flight(
... longitude=np.array([1, 2, 3, 5, 8]),
... latitude=np.arange(5),
... altitude=np.full(shape=(5,), fill_value=11000),
... time=pd.date_range('2021-01-01T12', '2021-01-01T14', periods=5),
... )
>>> sin, cos = fl.segment_angle()
```

(continues on next page)

(continued from previous page)

```
>>> sin
array([0.70716063, 0.70737598, 0.44819424, 0.31820671, nan])
```

```
>>> cos
array([0.70705293, 0.70683748, 0.8939362 , 0.94802136, nan])
```

**segment\_azimuth()**

Calculate (forward) azimuth at each waypoint.

Method calls `pyproj.Geod.inv`, which is slow. See `geo.forward_azimuth` for an outline of a faster implementation.

Changed in version 0.33.7: The dtype of the output now matches the dtype of `self["longitude"]`.

**Returns**

`npt.NDArray[np.float64]` – Array of azimuths.

**See also:**

`segment_angle()`, `geo.forward_azimuth()`

**segment\_groundspeed(\*args, \*\*kwargs)**

Return groundspeed across segments.

Calculate by dividing the horizontal segment length by the difference in waypoint times.

**Parameters**

- **smooth** (`bool`, *optional*) – Smooth airspeed with Savitzky-Golay filter. Defaults to `False`.
- **window\_length** (`int`, *optional*) – Passed directly to `scipy.signal.savgol_filter()`, by default 7.
- **polyorder** (`int`, *optional*) – Passed directly to `scipy.signal.savgol_filter()`, by default 1.

**Returns**

`npt.NDArray[np.float64]` – Groundspeed of the segment, [ $m s^{-1}$ ]

**segment\_length()**

Compute spherical distance between flight waypoints.

Helper function used in `length()` and `length_met()`. `np.nan` appended so the length of the output is the same as number of waypoints.

**Returns**

`npt.NDArray[np.float64]` – Array of distances in [ $m$ ] between waypoints

**Raises**

**NotImplementedError** – Raises when `attr:attrs["crs"]` is not EPSG:4326

## Examples

```
>>> from pycontrails import Flight
>>> fl = Flight(
... longitude=np.array([1, 2, 3, 5, 8]),
... latitude=np.arange(5),
... altitude=np.full(shape=(5,), fill_value=11000),
... time=pd.date_range('2021-01-01T12', '2021-01-01T14', periods=5),
... )
>>> fl.segment_length()
array([157255.03346286, 157231.08336815, 248456.48781503, 351047.44358851,
       nan])
```

### See also:

[`segment\_length\(\)`](#)

**segment\_true\_airspeed**(*u\_wind=0.0*, *v\_wind=0.0*, *smooth=True*, *window\_length=7*, *polyorder=1*)

Calculate the true airspeed [*m/s*] from the ground speed and horizontal winds.

Because `Flight.segment_true_airspeed` uses a smoothing pattern, waypoints in data are not independent. Moreover, we expect the final waypoint of each flight to have a nan value associated to any segment property. Consequently, we need to define a custom method here to deal with these issues when applying this method on a fleet of flights.

See docstring for `Flight.segment_true_airspeed()`.

### Raises

**RuntimeError** – Unexpected key `__u_wind` or `__v_wind` found in data.

**sort**(*by*)

Sort data by key(s).

This method always creates a copy of the data by calling `pandas.DataFrame.sort_values()`.

### Parameters

**by** (*str* | *list[str]*) – Key or list of keys to sort by.

### Returns

`VectorDatasetType` – Instance with sorted data.

**to\_flight\_list**(*copy=True*)

De-concatenate merged waypoints into a list of Flight instances.

Any global attrs are lost.

### Parameters

**copy** (*bool*, *optional*) – If True, make copy of each flight instance in *seq*.

### Returns

`list[Flight]` – List of Flights in the same order as was passed into the *Fleet* instance.

## 11.6.6 pycontrails.core.flight

Flight Data Handling.

### Module Attributes

|                                    |                                                                                                                                          |
|------------------------------------|------------------------------------------------------------------------------------------------------------------------------------------|
| <code>MAX_AIRPORT_ELEVATION</code> | Max airport elevation, [ <i>ft</i> ] See <a href="#">Daocheng_Yading_Airport</a>                                                         |
| <code>MIN_CRUISE_ALTITUDE</code>   | Min estimated cruise altitude, [ <i>ft</i> ]                                                                                             |
| <code>SHORT_HAUL_DURATION</code>   | Short haul duration cutoff, [ <i>s</i> ]                                                                                                 |
| <code>MAX_ON_GROUND_SPEED</code>   | Set maximum speed compatible with "on_ground" indicator, [ <i>mph</i> ] Thresholds assessed based on scatter plot (150 knots = 278 km/h) |

### Functions

|                                                           |                                                                         |
|-----------------------------------------------------------|-------------------------------------------------------------------------|
| <code>filter_altitude</code> (time, altitude_ft[, ...])   | Filter noisy altitude on a single flight.                               |
| <code>segment_duration</code> (time[, dtype])             | Calculate the time difference between waypoints.                        |
| <code>segment_phase</code> (rocd, altitude_ft, *[, ...])  | Identify the phase of flight (climb, cruise, descent) for each segment. |
| <code>segment_rocd</code> (segment_duration, altitude_ft) | Calculate the rate of climb and descent (ROCD).                         |

### Classes

|                                                        |                             |
|--------------------------------------------------------|-----------------------------|
| <code>Flight</code> ([data, longitude, latitude, ...]) | A single flight trajectory. |
| <code>FlightPhase</code> (value[, names, module, ...]) | Flight phase enumeration.   |

**class** `pycontrails.core.flight.Flight`(*data=None*, \*, *longitude=None*, *latitude=None*, *altitude=None*, *altitude\_ft=None*, *level=None*, *time=None*, *attrs=None*, *copy=True*, *fuel=None*, *drop\_duplicated\_times=False*, \*\**attrs\_kwargs*)

Bases: [GeoVectorDataset](#)

A single flight trajectory.

Expect latitude-longitude coordinates in WGS 84. Expect altitude in [*m*]. Expect pressure level (*level*) in [*hPa*].

Use the attribute `attrs["crs"]` to specify coordinate reference system using [PROJ](#) or [EPSG](#) syntax.

#### Parameters

- **data** (`dict[str, np.ndarray]` | `pd.DataFrame` | `VectorDataDict` | `VectorDataset` | `None`) – Flight trajectory waypoints as data dictionary or [pandas.DataFrame](#). Must include columns `time`, `latitude`, `longitude`, `altitude` or `level`. Keyword arguments for `time`, `latitude`, `longitude`, `altitude` or `level` will override data inputs. Expects `altitude` in meters and `time` as a `DatetimeLike` (or array that can be processed with `pd.to_datetime()`). Additional waypoint-specific data can be included as additional keys/columns.
- **longitude** (`npt.ArrayLike`, *optional*) – Flight trajectory waypoint longitude. Defaults to `None`.

- **latitude** (`npt.ArrayLike`, *optional*) – Flight trajectory waypoint latitude. Defaults to None.
  - **altitude** (`npt.ArrayLike`, *optional*) – Flight trajectory waypoint altitude, [*m*]. Defaults to None.
  - **altitude\_ft** (`npt.ArrayLike`, *optional*) – Flight trajectory waypoint altitude, [*ft*].
  - **level** (`npt.ArrayLike`, *optional*) – Flight trajectory waypoint pressure level, [*hPa*]. Defaults to None.
  - **time** (`npt.ArrayLike`, *optional*) – Flight trajectory waypoint time. Defaults to None.
  - **attrs** (`dict[str, Any]`, *optional*) – Additional flight properties as a dictionary. While different models may utilize Flight attributes differently, pycontrails applies the following conventions:
    - **flight\_id**: An internal flight identifier. Used internally for Fleet interoperability.
    - **aircraft\_type**: Aircraft type ICAO, e.g. "A320".
    - **wingspan**: Aircraft wingspan, [*m*].
    - **n\_engine**: Number of aircraft engines.
    - **engine\_uid**: Aircraft engine unique identifier. Used for emissions calculations with the ICAO Aircraft Emissions Databank (EDB).
    - **max\_mach\_number**: Maximum Mach number at cruise altitude. Used by some aircraft performance models to clip true airspeed.
- Numeric quantities that are constant over the entire flight trajectory should be included as attributes.
- **copy** (`bool`, *optional*) – Copy data on Flight creation. Defaults to True.
  - **fuel** (`Fuel`, *optional*) – Fuel used in flight trajectory. Defaults to JetA.
  - **drop\_duplicated\_times** (`bool`, *optional*) – Drop duplicate times in flight trajectory. Defaults to False.
  - **\*\*attrs\_kwargs** (`Any`) – Additional flight properties passed as keyword arguments.

**Raises**

**KeyError** – Raises if data input does not contain at least `time`, `latitude`, `longitude`, (`altitude` or `level`).

**Notes**

The `Traffic` library has many helpful flight processing utilities.

See `traffic.core.Flight` for more information.

## Examples

```
>>> import numpy as np
>>> import pandas as pd
>>> from pycontrails import Flight
```

```
>>> # Create `Flight` from a DataFrame.
>>> df = pd.DataFrame({
...     "longitude": np.linspace(20, 30, 500),
...     "latitude": np.linspace(40, 10, 500),
...     "altitude": 10500,
...     "time": pd.date_range('2021-01-01T10', '2021-01-01T15', periods=500),
... })
>>> fl = Flight(data=df, flight_id=123) # specify a flight_id by keyword
>>> fl
Flight [4 keys x 500 length, 2 attributes]
Keys: longitude, latitude, altitude, time
Attributes:
time                [2021-01-01 10:00:00, 2021-01-01 15:00:00]
longitude           [20.0, 30.0]
latitude            [10.0, 40.0]
altitude            [10500.0, 10500.0]
flight_id           123
crs                 EPSG:4326
```

```
>>> # Create `Flight` from keywords
>>> fl = Flight(
...     longitude=np.linspace(20, 30, 200),
...     latitude=np.linspace(40, 30, 200),
...     altitude=11000 * np.ones(200),
...     time=pd.date_range('2021-01-01T12', '2021-01-01T14', periods=200),
... )
>>> fl
Flight [4 keys x 200 length, 1 attributes]
Keys: longitude, latitude, time, altitude
Attributes:
time                [2021-01-01 12:00:00, 2021-01-01 14:00:00]
longitude           [20.0, 30.0]
latitude            [30.0, 40.0]
altitude            [11000.0, 11000.0]
crs                 EPSG:4326
```

```
>>> # Access the underlying data as DataFrame
>>> fl.dataframe.head()
   longitude  latitude                time  altitude
0  20.000000  40.000000  2021-01-01 12:00:00.000000000  11000.0
1  20.050251  39.949749  2021-01-01 12:00:36.180904522  11000.0
2  20.100503  39.899497  2021-01-01 12:01:12.361809045  11000.0
3  20.150754  39.849246  2021-01-01 12:01:48.542713567  11000.0
4  20.201005  39.798995  2021-01-01 12:02:24.723618090  11000.0
```

```
clean_and_resample(freq='1min', fill_method='geodesic', geodesic_threshold=100000.0,
                  nominal_rocd=12.7, kernel_size=17, cruise_threshold=120.0, force_filter=False,
                  drop=True, keep_original_index=False, climb_descend_at_end=False)
```

Resample and (possibly) filter a flight trajectory.

Waypoints are resampled according to the frequency `freq`. If the original flight data has a short sampling period, `filter_altitude` will also be called to clean the data. Large gaps in trajectories may be interpolated as step climbs through `_altitude_interpolation`.

#### Parameters

- **freq** (`str`, *optional*) – Resampling frequency, by default “1min”
- **fill\_method** (`{“geodesic”, “linear”}`, *optional*) – Choose between “geodesic” and “linear”, by default “geodesic”. In geodesic mode, large gaps between waypoints are filled with geodesic interpolation and small gaps are filled with linear interpolation. In linear mode, all gaps are filled with linear interpolation.
- **geodesic\_threshold** (`float`, *optional*) – Threshold for geodesic interpolation, [*m*]. If the distance between consecutive waypoints is under this threshold, values are interpolated linearly.
- **nominal\_rocd** (`float`, *optional*) – Nominal rate of climb / descent for aircraft type. Defaults to `constants.nominal_rocd`.
- **kernel\_size** (`int`, *optional*) – Passed directly to `scipy.signal.medfilt()`, by default 11. Passed also to `scipy.signal.medfilt()`
- **cruise\_theshold** (`float`, *optional*) – Minimal length of time, in seconds, for a flight to be in cruise to apply median filter
- **force\_filter** (`bool`, *optional*) – If set to true, meth:`filter_altitude` will always be called. otherwise, it will only be called if the flight has a median sample period under 10 seconds
- **drop** (`bool`, *optional*) – Drop any columns that are not resampled and filled. Defaults to True, dropping all keys outside of “time”, “latitude”, “longitude” and “altitude”. If set to False, the extra keys will be kept but filled with nan or None values, depending on the data type.
- **keep\_original\_index** (`bool`, *optional*) – Keep the original index of the *Flight* in addition to the new resampled index. Defaults to False. .. versionadded:: 0.45.2
- **climb\_or\_descend\_at\_end** (`bool`) – If true, the climb or descent will be placed at the end of each segment rather than the start. Default is false (climb or descent immediately).

#### Returns

*Flight* – Filled Flight

`copy(**kwargs)`

Return a copy of this `VectorDatasetType` class.

#### Parameters

**\*\*kwargs** (`Any`) – Additional keyword arguments passed into the constructor of the returned class.

#### Returns

`VectorDatasetType` – Copy of class

`distance_to_coords(distance)`

Convert distance along flight path to geodesic coordinates.

Will return a tuple containing (*lat*, *lon*, *index*), where *index* indicates which flight segment contains the returned coordinate.



**Parameters**

**distance** (ArrayOrFloat) – Distance along flight path, [*m*]

**Returns**

(ArrayOrFloat, ArrayOrFloat, int | `npt.NDArray[int]`) – latitude, longitude, and segment index cooresponding to distance.

**property duration**

Determine flight duration.

**Returns**

`pd.Timedelta` – Difference between terminal and initial time

**filter**(*mask*, *copy=True*, *\*\*kwargs*)

Filter data according to a boolean array mask.

Entries corresponding to `mask == True` are kept.

**Parameters**

- **mask** (`npt.NDArray[np.bool_]`) – Boolean array with compatible shape.
- **copy** (`bool`, *optional*) – Copy data on filter. Defaults to True. See [numpy best practices](#) for insight into whether copy is appropriate.
- **\*\*kwargs** (*Any*) – Additional keyword arguments passed into the constructor of the returned class.

**Returns**

`VectorDatasetType` – Containing filtered data

**Raises**

**`TypeError`** – If `mask` is not a boolean array.

**filter\_altitude**(*kernel\_size=17*, *cruise\_threshold=120.0*)

Filter noisy altitude on a single flight.

Currently runs altitude through a median filter using `scipy.signal.medfilt()` with `kernel_size`, then a Savitzky-Golay filter to filter noise. The median filter is only applied during cruise segments that are longer than `cruise_threshold`.

**Parameters**

- **kernel\_size** (`int`, *optional*) – Passed directly to `scipy.signal.medfilt()`, by default 11. Passed also to `scipy.signal.medfilt()`
- **cruise\_theshold** (`float`, *optional*) – Minimal length of time, in seconds, for a flight to be in cruise to apply median filter

**Returns**

*Flight* – Filtered Flight

## Notes

Algorithm is derived from `traffic.core.flight.Flight.filter()`.

The `traffic` algorithm also computes thresholds on sliding windows and replaces unacceptable values with NaNs.

Errors may be raised if the `kernel_size` is too large.

### See also:

`traffic.core.flight.Flight.filter()`, `scipy.signal.medfilt()`

## `filter_by_first()`

Keep first row of group of waypoints with identical coordinates.

Chaining this method with `resample_and_fill` often gives a cleaner trajectory when using noisy flight waypoints.

### Returns

*Flight* – Filtered Flight instance

## Examples

```
>>> from datetime import datetime
>>> import pandas as pd
```

```
>>> df = pd.DataFrame()
>>> df['longitude'] = [0, 0, 50]
>>> df['latitude'] = 0
>>> df['altitude'] = 0
>>> df['time'] = [datetime(2020, 1, 1, h) for h in range(3)]
```

```
>>> fl = Flight(df)
```

```
>>> fl.filter_by_first().dataframe
   longitude  latitude  altitude  time
0         0.0        0.0        0.0 2020-01-01 00:00:00
1         50.0        0.0        0.0 2020-01-01 02:00:00
```

## `fuel`

Fuel used in flight trajectory

## `property length`

Return flight length based on WGS84 geodesic.

### Returns

*float* – Total flight length, [*m*]

### Raises

`NotImplementedError` – Raises when `attr:attrs["crs"]` is not EPSG:4326

## Examples

```
>>> import numpy as np
>>> fl = Flight(
...     longitude=np.linspace(20, 30, 200),
...     latitude=np.linspace(40, 30, 200),
...     altitude=11000 * np.ones(200),
...     time=pd.date_range('2021-01-01T12', '2021-01-01T14', periods=200),
... )
>>> fl.length
1436924.67...
```

**length\_met**(key, threshold=1.0)

Calculate total horizontal distance where column key exceeds threshold.

### Parameters

- **key** (str) – Column key in data
- **threshold** (float) – Consider trajectory waypoints whose associated key value exceeds threshold, by default 1.0

### Returns

float – Total distance, [m]

### Raises

- **KeyError** – data does not contain column key
- **NotImplementedError** – Raised when `attrs["crs"]` is not EPSG:4326

## Examples

```
>>> from datetime import datetime
>>> import pandas as pd
>>> import numpy as np
>>> from pycontrails.datalib.ecmwf import ERA5
>>> from pycontrails import Flight
```

```
>>> # Get met data
>>> times = (datetime(2022, 3, 1, 0), datetime(2022, 3, 1, 3))
>>> variables = ["air_temperature", "specific_humidity"]
>>> levels = [300, 250, 200]
>>> era5 = ERA5(time=times, variables=variables, pressure_levels=levels)
>>> met = era5.open_metdataset()
```

```
>>> # Build flight
>>> df = pd.DataFrame()
>>> df['time'] = pd.date_range('2022-03-01T00', '2022-03-01T03', periods=11)
>>> df['longitude'] = np.linspace(-20, 20, 11)
>>> df['latitude'] = np.linspace(-20, 20, 11)
>>> df['altitude'] = np.linspace(9500, 10000, 11)
>>> fl = Flight(df).resample_and_fill('10s')
```

```
>>> # Intersect and attach
>>> fl["air_temperature"] = fl.intersect_met(met['air_temperature'])
>>> fl["air_temperature"]
array([235.94657007, 235.95766965, 235.96873412, ..., 234.59917962,
       234.60387402, 234.60845312])
```

```
>>> # Length (in meters) of waypoints whose temperature exceeds 236K
>>> fl.length_met("air_temperature", threshold=236)
4132178.159...
```

```
>>> # Proportion (with respect to distance) of waypoints whose temperature_
↳ exceeds 236K
>>> fl.proportion_met("air_temperature", threshold=236)
0.663552...
```

**property max\_distance\_gap**

Return maximum distance gap between waypoints along flight trajectory.

Distance is calculated based on WGS84 geodesic.

**Returns**

`float` – Maximum distance between waypoints, [*m*]

**Raises**

`NotImplementedError` – Raises when `attr:attrs["crs"]` is not EPSG:4326

**Examples**

```
>>> import numpy as np
>>> fl = Flight(
...     longitude=np.linspace(20, 30, 200),
...     latitude=np.linspace(40, 30, 200),
...     altitude=11000 * np.ones(200),
...     time=pd.date_range('2021-01-01T12', '2021-01-01T14', periods=200),
... )
>>> fl.max_distance_gap
7391.27...
```

**property max\_time\_gap**

Return maximum time gap between waypoints along flight trajectory.

**Returns**

`pd.Timedelta` – Gap size

## Examples

```
>>> import numpy as np
>>> fl = Flight(
...     longitude=np.linspace(20, 30, 200),
...     latitude=np.linspace(40, 30, 200),
...     altitude=11000 * np.ones(200),
...     time=pd.date_range('2021-01-01T12', '2021-01-01T14', periods=200),
... )
>>> fl.max_time_gap
Timedelta('0 days 00:00:36.180...')
```

### `plot(**kwargs)`

Plot flight trajectory longitude-latitude values.

#### Parameters

**\*\*kwargs** (Any) – Additional plot properties to passed to *pd.DataFrame.plot*

#### Returns

`matplotlib.axes.Axes` – Plot

### `proportion_met(key, threshold=1.0)`

Calculate proportion of flight with certain meteorological constraint.

#### Parameters

- **key** (`str`) – Column key in data
- **threshold** (`float`) – Consider trajectory waypoints whose associated key value exceeds threshold, Defaults to 1.0

#### Returns

`float` – Ratio

### `resample_and_fill(freq='1min', fill_method='geodesic', geodesic_threshold=100000.0, nominal_rocd=12.7, drop=True, keep_original_index=False, climb_descend_at_end=False)`

Resample and fill flight trajectory with geodesics and linear interpolation.

Waypoints are resampled according to the frequency `freq`. Values for data columns `longitude`, `latitude`, and `altitude` are interpolated.

Resampled waypoints will include all multiples of `freq` between the flight start and end time. For example, when resampling to a frequency of 1 minute, a flight that starts at 2020/1/1 00:00:59 and ends at 2020/1/1 00:01:01 will return a single waypoint at 2020/1/1 00:01:00, whereas a flight that starts at 2020/1/1 00:01:01 and ends at 2020/1/1 00:01:59 will return an empty flight.

#### Parameters

- **freq** (`str`, *optional*) – Resampling frequency, by default “1min”
- **fill\_method** (`{“geodesic”, “linear”}`, *optional*) – Choose between “geodesic” and “linear”, by default “geodesic”. In geodesic mode, large gaps between waypoints are filled with geodesic interpolation and small gaps are filled with linear interpolation. In linear mode, all gaps are filled with linear interpolation.
- **geodesic\_threshold** (`float`, *optional*) – Threshold for geodesic interpolation, [*m*]. If the distance between consecutive waypoints is under this threshold, values are interpolated linearly.

- **nominal\_rocd** (float | None, *optional*) – Nominal rate of climb / descent for aircraft type. Defaults to `constants.nominal_rocd`.
- **drop** (bool, *optional*) – Drop any columns that are not resampled and filled. Defaults to True, dropping all keys outside of “time”, “latitude”, “longitude” and “altitude”. If set to False, the extra keys will be kept but filled with nan or None values, depending on the data type.
- **keep\_original\_index** (bool, *optional*) – Keep the original index of the *Flight* in addition to the new resampled index. Defaults to False. .. versionadded:: 0.45.2
- **climb\_or\_descend\_at\_end** (bool) – If true, the climb or descent will be placed at the end of each segment rather than the start. Default is false (climb or descent immediately).

**Returns***Flight* – Filled Flight**Raises****ValueError** – Unknown fill\_method**Examples**

```
>>> from datetime import datetime
>>> import pandas as pd
```

```
>>> df = pd.DataFrame()
>>> df['longitude'] = [0, 0, 50]
>>> df['latitude'] = 0
>>> df['altitude'] = 0
>>> df['time'] = [datetime(2020, 1, 1, h) for h in range(3)]
```

```
>>> fl = Flight(df)
>>> fl.dataframe
  longitude  latitude  altitude          time
0         0         0.0         0.0  0.0 2020-01-01 00:00:00
1         1         0.0         0.0  0.0 2020-01-01 01:00:00
2         2        50.0         0.0  0.0 2020-01-01 02:00:00
```

```
>>> fl.resample_and_fill('10min').dataframe # resample with 10 minute frequency
  longitude  latitude  altitude          time
0  0.000000         0.0         0.0  0.0 2020-01-01 00:00:00
1  0.000000         0.0         0.0  0.0 2020-01-01 00:10:00
2  0.000000         0.0         0.0  0.0 2020-01-01 00:20:00
3  0.000000         0.0         0.0  0.0 2020-01-01 00:30:00
4  0.000000         0.0         0.0  0.0 2020-01-01 00:40:00
5  0.000000         0.0         0.0  0.0 2020-01-01 00:50:00
6  0.000000         0.0         0.0  0.0 2020-01-01 01:00:00
7  8.333333         0.0         0.0  0.0 2020-01-01 01:10:00
8 16.666667         0.0         0.0  0.0 2020-01-01 01:20:00
9 25.000000         0.0         0.0  0.0 2020-01-01 01:30:00
10 33.333333         0.0         0.0  0.0 2020-01-01 01:40:00
11 41.666667         0.0         0.0  0.0 2020-01-01 01:50:00
12 50.000000         0.0         0.0  0.0 2020-01-01 02:00:00
```

**segment\_angle()**

Calculate sine and cosine for the angle between each segment and the longitudinal axis.

This is different from the usual navigational angle between two points known as *bearing*.

*Bearing* in 3D spherical coordinates is referred to as *azimuth*.

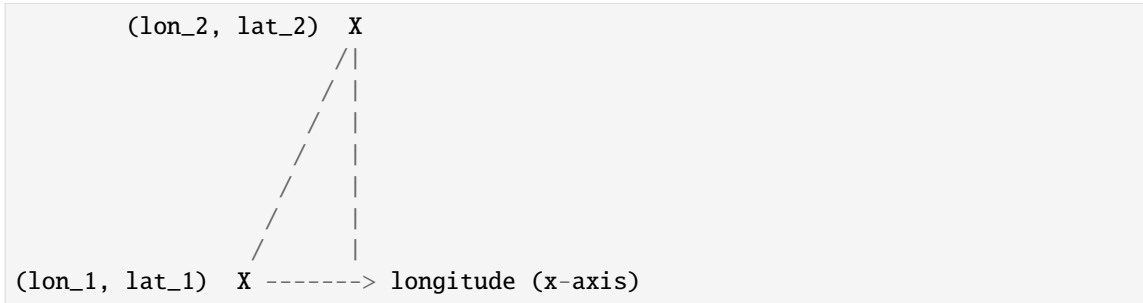**Returns**

`npt.NDArray[np.float64], npt.NDArray[np.float64]` – Returns  $\sin(a)$ ,  $\cos(a)$ , where  $a$  is the angle between the segment and the longitudinal axis. The final values are of both arrays are `np.nan`.

**See also:**

`geo.segment_angle()`, `units.heading_to_longitudinal_angle()`, `segment_azimuth()`, `geo.forward_azimuth()`

**Examples**

```
>>> from pycontrails import Flight
>>> fl = Flight(
... longitude=np.array([1, 2, 3, 5, 8]),
... latitude=np.arange(5),
... altitude=np.full(shape=(5,), fill_value=11000),
... time=pd.date_range('2021-01-01T12', '2021-01-01T14', periods=5),
... )
>>> sin, cos = fl.segment_angle()
>>> sin
array([0.70716063, 0.70737598, 0.44819424, 0.31820671,      nan])
```

```
>>> cos
array([0.70705293, 0.70683748, 0.8939362 , 0.94802136,      nan])
```

**segment\_azimuth()**

Calculate (forward) azimuth at each waypoint.

Method calls `pyproj.Geod.inv`, which is slow. See `geo.forward_azimuth` for an outline of a faster implementation.

Changed in version 0.33.7: The dtype of the output now matches the dtype of `self["longitude"]`.

**Returns**

`npt.NDArray[np.float64]` – Array of azimuths.

See also:

[`segment\_angle\(\)`](#), [`geo.forward\_azimuth\(\)`](#)

**segment\_duration**(*dtype=<class 'numpy.float32'>*)

Compute time elapsed between waypoints in seconds.

`np.nan` appended so the length of the output is the same as number of waypoints.

**Parameters**

**dtype** (`np.dtype`) – Numpy dtype for time difference. Defaults to `np.float64`

**Returns**

`npt.NDArray[np.float64]` – Time difference between waypoints, [*s*]. Returns an array with dtype specified by ``dtype``

**segment\_groundspeed**(*smooth=False, window\_length=7, polyorder=1*)

Return groundspeed across segments.

Calculate by dividing the horizontal segment length by the difference in waypoint times.

**Parameters**

- **smooth** (`bool`, *optional*) – Smooth airspeed with Savitzky-Golay filter. Defaults to `False`.
- **window\_length** (`int`, *optional*) – Passed directly to `scipy.signal.savgol_filter()`, by default 7.
- **polyorder** (`int`, *optional*) – Passed directly to `scipy.signal.savgol_filter()`, by default 1.

**Returns**

`npt.NDArray[np.float64]` – Groundspeed of the segment, [*ms<sup>-1</sup>*]

**segment\_haversine**()

Compute Haversine (great circle) distance between flight waypoints.

Helper function used in [`resample\_and\_fill\(\)`](#). `np.nan` appended so the length of the output is the same as number of waypoints.

To account for vertical displacements when computing segment lengths, use [`segment\_length\(\)`](#).

**Returns**

`npt.NDArray[np.float64]` – Array of great circle distances in [*m*] between waypoints

**Raises**

**NotImplementedError** – Raises when `attr:attrs["crs"]` is not EPSG:4326

## Examples

```
>>> from pycontrails import Flight
>>> fl = Flight(
... longitude=np.array([1, 2, 3, 5, 8]),
... latitude=np.arange(5),
... altitude=np.full(shape=(5,), fill_value=11000),
... time=pd.date_range('2021-01-01T12', '2021-01-01T14', periods=5),
... )
>>> fl.segment_haversine()
array([157255.03346286, 157231.08336815, 248456.48781503, 351047.44358851,
       nan])
```



See also:

[`segment\_haversine\(\)`](#), [`segment\_length\(\)`](#)

### `segment_length()`

Compute spherical distance between flight waypoints.

Helper function used in [`length\(\)`](#) and [`length\_met\(\)`](#). `np.nan` appended so the length of the output is the same as number of waypoints.

#### Returns

`npt.NDArray[np.float64]` – Array of distances in  $[m]$  between waypoints

#### Raises

**NotImplementedError** – Raises when `attr:attrs["crs"]` is not EPSG:4326

### Examples

```
>>> from pycontrails import Flight
>>> fl = Flight(
...     longitude=np.array([1, 2, 3, 5, 8]),
...     latitude=np.arange(5),
...     altitude=np.full(shape=(5,), fill_value=11000),
...     time=pd.date_range('2021-01-01T12', '2021-01-01T14', periods=5),
... )
>>> fl.segment_length()
array([157255.03346286, 157231.08336815, 248456.48781503, 351047.44358851,
       nan])
```

See also:

[`segment\_length\(\)`](#)

### `segment_mach_number(true_airspeed, air_temperature)`

Calculate the mach number of each segment.

#### Parameters

- **true\_airspeed** (`npt.NDArray[np.float64]`) – True airspeed of the segment,  $[m\ s^{-1}]$ . See [`segment\_true\_airspeed\(\)`](#).
- **air\_temperature** (`npt.NDArray[np.float64]`) – Average air temperature of each segment,  $[K]$

#### Returns

`npt.NDArray[np.float64]` – Mach number of each segment

### `segment_phase(threshold_rocd=250.0, min_cruise_altitude_ft=20000.0)`

Identify the phase of flight (climb, cruise, descent) for each segment.

#### Parameters

- **threshold\_rocd** (`float, optional`) – ROCD threshold to identify climb and descent,  $[ft\ min^{-1}]$ . Currently set to 250 ft/min.
- **min\_cruise\_altitude\_ft** (`float, optional`) – Minimum altitude for cruise,  $[ft]$  This is specific for each aircraft type, and can be approximated as 50% of the altitude ceiling. Defaults to 20000 ft.

**Returns**

`npt.NDArray[np.uint8]` – Array of values enumerating the flight phase. See `flight.FlightPhase` for enumeration.

**See also:**

`FlightPhase`, `segment_phase()`, `segment_rocd()`

**segment\_rocd()**

Calculate the rate of climb and descent (ROCD).

**Returns**

`npt.NDArray[np.float64]` – Rate of climb and descent over segment, [ $ftmin^{-1}$ ]

**See also:**

`segment_rocd()`

**segment\_true\_airspeed(*u\_wind=0.0, v\_wind=0.0, smooth=True, window\_length=7, polyorder=1*)**

Calculate the true airspeed [ $m/s$ ] from the ground speed and horizontal winds.

The calculated ground speed will first be smoothed with a Savitzky-Golay filter if enabled.

**Parameters**

- **u\_wind** (`npt.NDArray[np.float64]` | `float`) – U wind speed, [ $m s^{-1}$ ]. Defaults to 0 for all waypoints.
- **v\_wind** (`npt.NDArray[np.float64]` | `float`) – V wind speed, [ $m s^{-1}$ ]. Defaults to 0 for all waypoints.
- **smooth** (`bool`, *optional*) – Smooth airspeed with Savitzky-Golay filter. Defaults to True.
- **window\_length** (`int`, *optional*) – Passed directly to `scipy.signal.savgol_filter()`, by default 7.
- **polyorder** (`int`, *optional*) – Passed directly to `scipy.signal.savgol_filter()`, by default 1.

**Returns**

`npt.NDArray[np.float64]` – True wind speed of each segment, [ $m s^{-1}$ ]

**sort(*by*)**

Sort data by key(s).

This method always creates a copy of the data by calling `pandas.DataFrame.sort_values()`.

**Parameters**

**by** (`str` | `list[str]`) – Key or list of keys to sort by.

**Returns**

`VectorDatasetType` – Instance with sorted data.

**property time\_end**

Last waypoint time.

**Returns**

`pandas.Timestamp` – Last waypoint time

**property time\_start**

First waypoint time.

**Returns**

`pandas.Timestamp` – First waypoint time

**to\_geojson\_linestring()**

Return trajectory as geojson FeatureCollection containing single LineString.

**Returns**

dict[str, Any] – Python representation of geojson FeatureCollection

**to\_geojson\_multilinestring(key, split\_antimeridian=True)**

Return trajectory as GeoJSON FeatureCollection of MultiLineStrings.

Flight data is grouped according to values of **key**. Each group gives rise to a Feature containing a Multi-LineString geometry. LineStrings can be split over the antimeridian.

**Parameters**

- **key** (str) – Name of data column to group by
- **split\_antimeridian** (bool, optional) – Split linestrings that cross the antimeridian. Defaults to True

**Returns**

dict[str, Any] – Python representation of GeoJSON FeatureCollection of MultiLineString Features

**Raises**

**KeyError** – data does not contain column key

**to\_traffic()**

Convert Flight instance to `traffic.core.Flight` instance.

See <https://traffic-viz.github.io/traffic.core.flight.html#traffic.core.Flight>

**Returns**

`traffic.core.Flight` – `traffic.core.Flight` instance

**Raises**

**ModuleNotFoundError** – `traffic` package not installed

```
class pycontrails.core.flight.FlightPhase(value, names=None, *, module=None, qualname=None,
                                          type=None, start=1, boundary=None)
```

Bases: `IntEnum`

Flight phase enumeration.

Use `segment_phase()` or `Flight.segment_phase()` to determine flight phase.

**CLIMB = 1**

Waypoints at which the flight is in a climb phase

**CRUISE = 2**

Waypoints at which the flight is in a cruise phase

**DESCENT = 3**

Waypoints at which the flight is in a descent phase

**LEVEL\_FLIGHT = 4**

Waypoints at which the flight is not in a climb, cruise, or descent phase. In practice, this category is used for waypoints at which the ROCD resembles that of a cruise phase, but the altitude is below the minimum cruise altitude.

**NAN = 5**

Waypoints at which the ROCD is not defined.

`pycontrails.core.flight.MAX_AIRPORT_ELEVATION = 15000.0`

Max airport elevation, [*ft*] See [Daocheng\\_Yading\\_Airport](#)

`pycontrails.core.flight.MAX_ON_GROUND_SPEED = 150.0`

Set maximum speed compatible with “on\_ground” indicator, [*mph*] Thresholds assessed based on scatter plot (150 knots = 278 km/h)

`pycontrails.core.flight.MIN_CRUISE_ALTITUDE = 20000.0`

Min estimated cruise altitude, [*ft*]

`pycontrails.core.flight.SHORT_HAUL_DURATION = 3600.0`

Short haul duration cutoff, [*s*]

`pycontrails.core.flight.filter_altitude(time, altitude_ft, kernel_size=17, cruise_threshold=120)`

Filter noisy altitude on a single flight.

Currently runs altitude through a median filter using `scipy.signal.medfilt()` with `kernel_size`, then a Savitzky-Golay filter to filter noise. The median filter is only applied during cruise segments that are longer than `cruise_threshold`.

#### Parameters

- **time** (`npt.NDArray[np.datetime64]`) – Waypoint time in `np.datetime64` format.
- **altitude\_ft** (`npt.NDArray[np.float64]`) – Altitude signal in feet
- **kernel\_size** (`int`, *optional*) – Passed directly to `scipy.signal.medfilt()`, by default 11. Passed also to `scipy.signal.medfilt()`
- **cruise\_theshold** (`int`, *optional*) – Minimal length of time, in seconds, for a flight to be in cruise to apply median filter

#### Returns

`npt.NDArray[np.float64]` – Filtered altitude

#### Notes

Algorithm is derived from `traffic.core.flight.Flight.filter()`.

The `traffic` algorithm also computes thresholds on sliding windows and replaces unacceptable values with NaNs.

Errors may raised if the `kernel_size` is too large.

#### See also:

`traffic.core.flight.Flight.filter()`, `scipy.signal.medfilt()`

`pycontrails.core.flight.segment_duration(time, dtype=<class 'numpy.float32'>)`

Calculate the time difference between waypoints.

`np.nan` appended so the length of the output is the same as number of waypoints.

#### Parameters

- **time** (`npt.NDArray[np.datetime64]`) – Waypoint time in `np.datetime64` format.
- **dtype** (`np.dtype`) – Numpy dtype for time difference. Defaults to `np.float64`

#### Returns

`npt.NDArray[np.float64]` – Time difference between waypoints, [*s*]. This returns an array with dtype specified by “`dtype`”.

`pycontrails.core.flight.segment_phase(rocld, altitude_ft, *, threshold_rocd=250.0, min_cruise_altitude_ft=20000.0)`

Identify the phase of flight (climb, cruise, descent) for each segment.

#### Parameters

- **rocld** (`pt.NDArray[np.float64]`) – Rate of climb and descent across segment, [ $ftmin^{-1}$ ]. See output from `segment_rocd()`.
- **altitude\_ft** (`npt.NDArray[np.float64]`) – Altitude, [ $ft$ ]
- **threshold\_rocd** (`float, optional`) – ROCD threshold to identify climb and descent, [ $ftmin^{-1}$ ]. Defaults to 250 ft/min.
- **min\_cruise\_altitude\_ft** (`float, optional`) – Minimum threshold altitude for cruise, [ $ft$ ]. This is specific for each aircraft type, and can be approximated as 50% of the altitude ceiling. Defaults to `MIN_CRUISE_ALTITUDE`.

#### Returns

`npt.NDArray[np.uint8]` – Array of values enumerating the flight phase. See `flight.FlightPhase` for enumeration.

#### Notes

Flight data derived from ADS-B and radar sources could contain noise leading to small changes in altitude and ROCD. Hence, an arbitrary `threshold_rocd` is specified to identify the different phases of flight.

The flight phase “level-flight” is when an aircraft is holding at lower altitudes. The cruise phase of flight only occurs above a certain threshold altitude.

#### See also:

[FlightPhase](#), [segment\\_rocd\(\)](#)

`pycontrails.core.flight.segment_rocd(segment_duration, altitude_ft)`

Calculate the rate of climb and descent (ROCD).

#### Parameters

- **segment\_duration** (`npt.NDArray[np.float64]`) – Time difference between waypoints, [ $s$ ]. Expected to have numeric `dtype`, not “`timedelta64`”. See output from `segment_duration()`.
- **altitude\_ft** (`npt.NDArray[np.float64]`) – Altitude of each waypoint, [ $ft$ ]

#### Returns

`npt.NDArray[np.float64]` – Rate of climb and descent over segment, [ $ftmin^{-1}$ ]

#### See also:

[segment\\_duration\(\)](#)

## 11.6.7 pycontrails.core.fuel

Fuel data support.

### Classes

|                                                          |                                                     |
|----------------------------------------------------------|-----------------------------------------------------|
| <i>Fuel</i> (fuel_name, q_fuel, hydrogen_content, ...)   | Base class for the physical parameters of the fuel. |
| <i>HydrogenFuel</i> ([fuel_name, q_fuel, ...])           | Hydrogen Fuel.                                      |
| <i>JetA</i> ([fuel_name, q_fuel, hydrogen_content, ...]) | Jet A-1 Fuel.                                       |
| <i>SAFBlend</i> (pct_blend)                              | Jet A-1 / Sustainable Aviation Fuel Blend.          |

```
class pycontrails.core.fuel.Fuel(fuel_name, q_fuel, hydrogen_content, ei_co2, ei_h2o, ei_so2,
                                ei_sulphates, ei_oc)
```

Bases: `object`

Base class for the physical parameters of the fuel.

**ei\_co2**

CO2 emissions index for fuel, [ $kg_{CO_2} kg_{fuel}^{-1}$ ]

**ei\_h2o**

Water vapour emissions index for fuel, [ $kg_{H_2O} kg_{fuel}^{-1}$ ]

**ei\_oc**

Organic carbon emissions index for fuel, [ $kg_{OC} kg_{fuel}^{-1}$ ]

**ei\_so2**

Sulphur oxide, SO<sub>2</sub>-S gas, emissions index for fuel, [ $kg_{SO_2} kg_{fuel}^{-1}$ ]

**ei\_sulphates**

Sulphates, S(VI)-S particle, emissions index for fuel, [ $kg_S kg_{fuel}^{-1}$ ]

**fuel\_name**

Fuel Name

**hydrogen\_content**

Percentage of hydrogen mass content in the fuel

**q\_fuel**

Lower calorific value (LCV) of fuel, [ $J kg_{fuel}^{-1}$ ]

```
class pycontrails.core.fuel.HydrogenFuel(fuel_name='Hydrogen', q_fuel=122800000.0,
                                          hydrogen_content=nan, ei_co2=0.0, ei_h2o=9.21, ei_so2=0.0,
                                          ei_sulphates=0.0, ei_oc=0.0)
```

Bases: `Fuel`

Hydrogen Fuel.

## References

- [Khan *et al.*, 2022]

**ei\_co2 = 0.0**

CO2 emissions index for fuel, [ $kg_{CO_2} kg_{fuel}^{-1}$ ]

**ei\_h2o = 9.21**

Water vapour emissions index for fuel, [ $kg_{H_2O} kg_{fuel}^{-1}$ ]

**ei\_oc = 0.0**

Organic carbon emissions index for fuel, [ $kg_{OC} kg_{fuel}^{-1}$ ]

**ei\_so2 = 0.0**

Sulphur oxide, SO2-S gas, emissions index for fuel, [ $kg_{SO_2} kg_{fuel}^{-1}$ ]

**ei\_sulphates = 0.0**

Sulphates, S(VI)-S particle, emissions index for fuel, [ $kg_S kg_{fuel}^{-1}$ ]

**fuel\_name = 'Hydrogen'**

Fuel Name

**hydrogen\_content = nan**

Percentage of hydrogen mass content in the fuel

**q\_fuel = 122800000.0**

Lower calorific value (LCV) of fuel, [ $J kg_{fuel}^{-1}$ ]

```
class pycontrails.core.fuel.JetA(fuel_name='Jet A-1', q_fuel=43130000.0, hydrogen_content=13.8,
    ei_co2=3.159, ei_h2o=1.23, ei_so2=0.0012,
    ei_sulphates=2.4489795918367345e-05,
    ei_oc=1.9999999999999998e-05)
```

Bases: [Fuel](#)

Jet A-1 Fuel.

## References

- [Celikel and Jelinek, 2001]
- [Lee *et al.*, 2021]
- [Stettler *et al.*, 2011]
- [Wilkerson *et al.*, 2010]

**ei\_co2 = 3.159**

CO2 emissions index for fuel, [ $kg_{CO_2} kg_{fuel}^{-1}$ ]

**ei\_h2o = 1.23**

Water vapour emissions index for fuel, [ $kg_{H_2O} kg_{fuel}^{-1}$ ]

**ei\_oc = 1.9999999999999998e-05**

Organic carbon emissions index for fuel, [ $kg_{OC} kg_{fuel}^{-1}$ ] - High uncertainty - Wilkerson et al. (2010): EI\_OC = 15 mg/kg-fuel - Stettler et al. (2011): EI\_OC = 20 [1, 40] mg/kg-fuel

**ei\_so2 = 0.0012**

Sulphur oxide, SO<sub>2</sub>-S gas, emissions index for fuel, [ $kg_{SO_2} kg_{fuel}^{-1}$ ] - The EI SO<sub>2</sub> is proportional to the fuel sulphur content - Celikel (2001): EI\_SO<sub>2</sub> = 0.84 g/kg-fuel for 450 ppm fuel - Lee et al. (2021): EI\_SO<sub>2</sub> = 1.2 g/kg-fuel for 600 ppm fuel

**ei\_sulphates = 2.4489795918367345e-05**

Sulphates, S(VI)-S particle, emissions index for fuel, [ $kg_S kg_{fuel}^{-1}$ ] - The SO<sub>x</sub>-S is partitioned into 98% SO<sub>2</sub>-S gas and 2% S(VI)-S particle - References: Wilkerson et al. (2010) & Stettler et al. (2011)

**fuel\_name = 'Jet A-1'**

Fuel Name

**hydrogen\_content = 13.8**

Percentage of hydrogen mass content in the fuel

**q\_fuel = 43130000.0**

Lower calorific value (LCV) of fuel, [ $J kg_{fuel}^{-1}$ ]

**class pycontrails.core.fuel.SAFBlend(pct\_blend)**

Bases: *Fuel*

Jet A-1 / Sustainable Aviation Fuel Blend.

SAF only changes the CO<sub>2</sub> lifecycle emissions, not the CO<sub>2</sub> emissions emitted at the aircraft exhaust. We assume that the EI OC stays the same as Jet A-1 fuel due to lack of data.

**Parameters**

**pct\_blend (float)** – Sustainable aviation fuel percentage blend ratio by volume, %. Expected to be in the interval [0, 100].

**References**

- [Teoh *et al.*, 2022]
- [Schripp *et al.*, 2022]

**ei\_co2**

CO<sub>2</sub> emissions index for fuel, [ $kg_{CO_2} kg_{fuel}^{-1}$ ]

**ei\_h2o**

Water vapour emissions index for fuel, [ $kg_{H_2O} kg_{fuel}^{-1}$ ]

**ei\_oc**

Organic carbon emissions index for fuel, [ $kg_{OC} kg_{fuel}^{-1}$ ]

**ei\_so2**

Sulphur oxide, SO<sub>2</sub>-S gas, emissions index for fuel, [ $kg_{SO_2} kg_{fuel}^{-1}$ ]

**ei\_sulphates**

Sulphates, S(VI)-S particle, emissions index for fuel, [ $kg_S kg_{fuel}^{-1}$ ]

**fuel\_name**

Fuel Name

**hydrogen\_content**

Percentage of hydrogen mass content in the fuel



**q\_fuel**

Lower calorific value (LCV) of fuel, [ $J kg_{fuel}^{-1}$ ]

**11.6.8 pycontrails.core.interpolation**

Interpolation utilities.

**Functions**

|                                                                 |                                               |
|-----------------------------------------------------------------|-----------------------------------------------|
| <code>interp</code> (longitude, latitude, level, time, da, ...) | Interpolate over a grid with localize option. |
|-----------------------------------------------------------------|-----------------------------------------------|

**Classes**

|                                                               |                                                                       |
|---------------------------------------------------------------|-----------------------------------------------------------------------|
| <code>EmissionsProfileInterpolator</code> (xp, fp[, ...])     | Support for interpolating a profile on a linear or logarithmic scale. |
| <code>PycontrailsRegularGridInterpolator</code> (points, ...) | Support for performant interpolation over a regular grid.             |
| <code>RGIArtifacts</code> (xi_indices, norm_distances, ...)   | An interface to intermediate RGI interpolation artifacts.             |

**class** `pycontrails.core.interpolation.EmissionsProfileInterpolator`(xp, fp, drop\_duplicates=True)

Bases: `object`

Support for interpolating a profile on a linear or logarithmic scale.

This class simply wraps `numpy.interp()` with fixed values for the `xp` and `fp` arguments. Unlike `xarray.DataArray` interpolation, the `numpy.interp` automatically clips values outside the range of the `xp` array.

**Parameters**

- **xp** (`npt.NDarray[np.float64]`) – Array of x-values. These must be strictly increasing and free from any nan values. Passed to `numpy.interp()`.
- **fp** (`npt.NDarray[np.float64]`) – Array of y-values. Passed to `numpy.interp()`.
- **drop\_duplicates** (`bool`, *optional*) – Whether to drop duplicate values in `xp`. Defaults to `True`.

**Examples**

```
>>> xp = np.array([3, 7, 10, 30], dtype=float)
>>> fp = np.array([0.1, 0.2, 0.3, 0.4], dtype=float)
>>> epi = EmissionsProfileInterpolator(xp, fp)
>>> # Interpolate a single value
>>> epi.interp(5)
0.150000...
```

```
>>> # Interpolate a single value on a logarithmic scale
>>> epi.log_interp(5)
1.105171...
```

```
>>> # Demonstrate speed up compared with xarray.DataArray interpolation
>>> import time, xarray as xr
>>> da = xr.DataArray(fp, dims=["x"], coords={"x": xp})
```

```
>>> inputs = [np.random.uniform(0, 31, size=200) for _ in range(1000)]
>>> t0 = time.perf_counter()
>>> xr_out = [da.interp(x=x.clip(3, 30)).values for x in inputs]
>>> t1 = time.perf_counter()
>>> np_out = [epi.interp(x) for x in inputs]
>>> t2 = time.perf_counter()
>>> assert np.allclose(xr_out, np_out)
```

```
>>> # We see a 100 fold speed up (more like 500x faster, but we don't
>>> # want the test to fail!)
>>> assert t2 - t1 < (t1 - t0) / 100
```

**interp(x)**

Interpolate x against xp and fp.

**Parameters**

x (npt.NDArray[np.float64]) – Array of x-values to interpolate.

**Returns**

npt.NDArray[np.float64] – Array of interpolated y-values arising from the x-values. The dtype of the output array is the same as the dtype of x.

**log\_interp(x)**

Interpolate x against xp and fp on a logarithmic scale.

**This method composes the following three functions.**

1. `numpy.log()`
2. `interp()`
3. `numpy.exp()`

**Parameters**

x (npt.NDArray[np.float64]) – Array of x-values to interpolate.

**Returns**

npt.NDArray[np.float64] – Array of interpolated y-values arising from the x-values.

```
class pycontrails.core.interpolation.PycontrailsRegularGridInterpolator(points, values, method,
                                                                    bounds_error,
                                                                    fill_value)
```

Bases: `RegularGridInterpolator`

Support for performant interpolation over a regular grid.

This class is a thin wrapper around the `scipy.interpolate.RegularGridInterpolator` in order to make typical pycontrails use-cases more efficient.

#. Avoid `RegularGridInterpolator` constructor validation. In `interp()`, parameters are carefully crafted to fit into the intended form, thereby making validation unnecessary. #. Override the `_evaluate_linear()` method with a faster implementation. See the `_evaluate_linear()` docstring for more information.

This class should not be used directly. Instead, use the `interp()` function.

Changed in version 0.40.0: The `_evaluate_linear()` method now uses a Cython implementation. The dtype of the output is now consistent with the dtype of the underlying values

#### Parameters

- **points** (tuple[npt.NDArray[np.float64], ]) – Coordinates of the grid points.
- **values** (npt.NDArray[np.float64]) – Grid values. The shape of this array must be compatible with the coordinates. An error is raised if the dtype is not `np.float32` or `np.float64`.
- **method** (str) – Passed into `scipy.interpolate.RegularGridInterpolator`
- **bounds\_error** (bool) – Passed into `scipy.interpolate.RegularGridInterpolator`
- **fill\_value** (float | np.float64 | None) – Passed into `scipy.interpolate.RegularGridInterpolator`

`class pycontrails.core.interpolation.RGIArtifacts(xi_indices, norm_distances, out_of_bounds)`

Bases: `object`

An interface to intermediate RGI interpolation artifacts.

**norm\_distances**

**out\_of\_bounds**

**xi\_indices**

`pycontrails.core.interpolation.interp(longitude, latitude, level, time, da, method, bounds_error, fill_value, localize, *, indices=None, return_indices=False)`

Interpolate over a grid with localize option.

Changed in version 0.25.6: Utilize scipy 1.9 upgrades to remove singleton dimensions.

Changed in version 0.26.0: Include `indices` and `return_indices` experimental parameters. Currently, nan values in `longitude`, `latitude`, `level`, or `time` are always propagated through to the output, regardless of `bounds_error`. In other words, a `ValueError` for an out of bounds coordinate is only raised if a non-nan value is out of bounds.

Changed in version 0.40.0: When `return_indices` is `True`, an instance of `RGIArtifacts` is used to store the indices artifacts.

#### Parameters

- **longitude, latitude, level, time** (`numpy.ndarray`) – Coordinates of points to be interpolated. These parameters have the same meaning as `x` in analogy with `numpy.interp()`. All four of these arrays must be 1 dimensional of the same size.
- **da** (`xarray.DataArray`) – Gridded data interpolated over. Must adhere to `MetDataArray` conventions. In particular, the dimensions of `da` must be `longitude`, `latitude`, `level`, and `time`. The three spatial dimensions must be monotonically increasing with `float64` dtype. The `time` dimension must be monotonically increasing with `datetime64` dtype. Assumed to be cheap to load into memory (`xr.DataArray.values` is used without hesitation).
- **method** (str) – Passed into `scipy.interpolate.RegularGridInterpolator`.
- **bounds\_error** (bool) – Passed into `scipy.interpolate.RegularGridInterpolator`.
- **fill\_value** (float | np.float64 | None) – Passed into `scipy.interpolate.RegularGridInterpolator`.
- **localize** (bool) – If `True`, clip `da` to the smallest bounding box that contains all of coords.

- **indices** (`tuple | None, optional`) – Experimental. Provide intermediate artifacts computed by `:meth:scipy.interpolate.RegularGridInterpolator._find_indices`` to avoid redundant computation. If known and provided, this can speed up interpolation by avoiding an unnecessary call to ```_find_indices`. By default, `None`. Must be used precisely.
- **return\_indices** (`bool, optional`) – If `True`, return output of `scipy.interpolate.RegularGridInterpolator._find_indices()` in addition to interpolated values.

**Returns**

`npt.NDArray[np.float64] | tuple[npt.NDArray[np.float64], RGIArtifacts]` – Interpolated values with same size as `longitude`. If `return_indices` is `True`, return intermediate indices artifacts as well.

**See also:**

- `meth:MetDataArray.interpolate`
- `func:scipy.interpolate.interpn`
- `class:scipy.interpolate.RegularGridInterpolator`

## 11.6.9 pycontrails.core.met

Meteorology data models.

### Functions

|                                                   |                                                                                            |
|---------------------------------------------------|--------------------------------------------------------------------------------------------|
| <code>downselect(data, bbox)</code>               | Downselect <code>xr.Dataset</code> or <code>xr.DataArray</code> with spatial bounding box. |
| <code>originates_from_ecmwf(met)</code>           | Check if data appears to have originated from an ECMWF source.                             |
| <code>shift_longitude(data[, bound])</code>       | Shift longitude values from any input domain to <code>[bound, 360 + bound)</code> domain.  |
| <code>standardize_variables(ds, variables)</code> | Rename all variables in dataset from short name to standard name.                          |

### Classes

|                                                    |                                                                |
|----------------------------------------------------|----------------------------------------------------------------|
| <code>MetBase()</code>                             | Abstract class for building Meteorology Data handling classes. |
| <code>MetDataArray(data[, cachestore, ...])</code> | Meteorological <code>DataArray</code> of single variable.      |
| <code>MetDataset(data[, cachestore, ...])</code>   | Meteorological dataset with multiple variables.                |

**class** `pycontrails.core.met.MetBase`

Bases: `ABC`, `Generic[XArrayType]`

Abstract class for building Meteorology Data handling classes.

All support here should be generic to work on `xr.DataArray` and `xr.Dataset`.

#### property `attrs`

Pass through to `self.data.attrs`.

#### abstract `broadcast_coords(name)`

Broadcast coordinates along other dimensions.

##### Parameters

**name** (`str`) – Coordinate/dimension name to broadcast. Can be a dimension or non-dimension coordinates.

##### Returns

`xarray.DataArray` – DataArray of the coordinate broadcasted along all other dimensions. The DataArray will have the same shape as the gridded data.

#### property `cache_store`

Cache datastore to use for `save()` or `load()`

#### property `coords`

Get coordinates of underlying `data` coordinates.

Only return non-dimension coordinates.

See: <http://xarray.pydata.org/en/stable/user-guide/data-structures.html#coordinates>

##### Returns

`dict[str, np.ndarray]` – Dictionary of coordinates

#### property `data`

DataArray or Dataset

#### `dim_order = ['longitude', 'latitude', 'level', 'time']`

Default dimension order for DataArray or Dataset (x, y, z, t)

#### abstract `downselect(bbox)`

Downselect met data within spatial bounding box.

##### Parameters

**bbox** (`list[float]`) – List of coordinates defining a spatial bounding box in WGS84 coordinates. For 2D queries, list is [west, south, east, north]. For 3D queries, list is [west, south, min-level, east, north, max-level] with level defined in [*hPa*].

##### Returns

`MetBase` – Return downselected data

#### `downselect_met(met, *, longitude_buffer=(0.0, 0.0), latitude_buffer=(0.0, 0.0), level_buffer=(0.0, 0.0), time_buffer=(numpy.timedelta64(0, 'h'), numpy.timedelta64(0, 'h')), copy=True)`

Downselect met to encompass a spatiotemporal region of the data.

**Warning:** This method is analogous to `GeoVectorDataset.downselect_met()`. It does not change the instance data, but instead operates on the `met` input. This method is different from `downselect()` which operates on the instance data.

##### Parameters

- **met** (`MetDataset` | `MetDataArray`) – `MetDataset` or `MetDataArray` to downselect.

- **longitude\_buffer** (tuple[float, float], *optional*) – Extend longitude domain past by longitude\_buffer[0] on the low side and longitude\_buffer[1] on the high side. Units must be the same as class coordinates. Defaults to (0, 0) degrees.
- **latitude\_buffer** (tuple[float, float], *optional*) – Extend latitude domain past by latitude\_buffer[0] on the low side and latitude\_buffer[1] on the high side. Units must be the same as class coordinates. Defaults to (0, 0) degrees.
- **level\_buffer** (tuple[float, float], *optional*) – Extend level domain past by level\_buffer[0] on the low side and level\_buffer[1] on the high side. Units must be the same as class coordinates. Defaults to (0, 0) [hPa].
- **time\_buffer** (tuple[np.timedelta64, np.timedelta64], *optional*) – Extend time domain past by time\_buffer[0] on the low side and time\_buffer[1] on the high side. Units must be the same as class coordinates. Defaults to (np.timedelta64(0, "h"), np.timedelta64(0, "h")).
- **copy** (bool) – If returned object is a copy or view of the original. True by default.

**Returns**

MetDataset | MetdataArray – Copy of downselected MetDataset or MetdataArray.

**property hash**

Generate a unique hash for this met instance.

Note this is not as robust as it could be since *repr* cuts off.

**Returns**

str – Unique hash for met instance (sha1)

**property indexes**

Low level access to underlying *data* indexes.

This method is typically is faster for accessing coordinate indexes.

New in version 0.25.2.

**Returns**

dict[Hashable, pd.Index] – Dictionary of indexes.

**Examples**

```
>>> from pycontrails.datalib.ecmwf import ERA5
>>> times = (datetime(2022, 3, 1, 12), datetime(2022, 3, 1, 13))
>>> variables = "air_temperature", "specific_humidity"
>>> levels = [200, 300]
>>> era5 = ERA5(times, variables, levels)
>>> mds = era5.open_metdataset()
>>> mds.indexes["level"].to_numpy()
array([200., 300.]
```

```
>>> mda = mds["air_temperature"]
>>> mda.indexes["level"].to_numpy()
array([200., 300.]
```

**property is\_single\_level**

Check if instance contains “single level” or “surface level” data.

This method checks if `level` dimension contains a single value equal to -1, the pycontrails convention for surface only data.

**Returns**

`bool` – If instance contains single level data.

**property is\_wrapped**

Check if the longitude dimension covers the closed interval `[-180, 180]`.

Assumes the longitude dimension is sorted (this is established by the `MetDataset` or `MetDataArray` constructor).

**Returns**

`bool` – True if longitude coordinates cover `[-180, 180]`

**See also:**

`pycontrails.physics.geo.advect_longitude()`

**property is\_zarr**

Check if underlying `data` is sourced from a Zarr group.

Implementation is very brittle, and may break as external libraries change.

Some dask intermediate artifact is cached when this is called. Typically, subsequent calls to this method are much faster than the initial call.

New in version 0.26.0.

**Returns**

`bool` – If data is based on a Zarr group.

**abstract property shape**

Return the shape of the dimensions.

**Returns**

`tuple[int, int, int, int]` – Shape of underlying data

**abstract property size**

Return the size of (each) array in underlying `data`.

**Returns**

`int` – Total number of grid points in underlying data

**property variables**

See `indexes`.

```
class pycontrails.core.met.MetDataArray(data, cachestore=None, wrap_longitude=False, copy=True,
                                       validate=True, name=None, **kwargs)
```

Bases: `MetBase`

Meteorological DataArray of single variable.

Wrapper around `xr.DataArray` to enforce certain variables and dimensions for internal usage.

**Parameters**

- **data** (`ArrayLike`) – `xr.DataArray` or other array-like data source. When array-like input is provided, input `**kwargs` passed directly to `xr.DataArray` constructor.

- **cachestore** (`CacheStore`, *optional*) – Cache datastore for staging intermediates with `save()`. Defaults to `DiskCacheStore`.
- **wrap\_longitude** (`bool`, *optional*) – Wrap data along the longitude dimension. If `True`, duplicate and shift longitude values (ie, `-180 -> 180`) to ensure that the longitude dimension covers the entire interval `[-180, 180]`. Defaults to `False`.
- **copy** (`bool`, *optional*) – Copy `data` parameter on construction, by default `True`. If `data` is lazy-loaded via `dask`, this parameter has no effect. If `data` is already loaded into memory, a copy of the data (rather than a view) may be created if `True`.
- **validate** (`bool`, *optional*) – Confirm that the parameter `data` has correct specification. This automatically handled in the case that `copy=True`. Validation only introduces a very small overhead. This parameter should only be set to `False` if working with data derived from an existing `MetDataset` or `:class`MetdataArray``. By default `True`.
- **name** (`Hashable`, *optional*) – Name of the data variable. If not specified, the name will be set to “met”.
- **\*\*kwargs** – To be removed in future versions. Passed directly to `xr.DataArray` constructor.

## Examples

```
>>> import numpy as np
>>> import xarray as xr
>>> rng = np.random.default_rng(seed=456)
```

```
>>> # Cook up random xarray object
>>> coords = {
...     "longitude": np.arange(-20, 20),
...     "latitude": np.arange(-30, 30),
...     "level": [220, 240, 260, 280],
...     "time": [np.datetime64("2021-08-01T12", "ns"), np.datetime64("2021-08-01T16
↪", "ns")]
...     }
>>> da = xr.DataArray(rng.random((40, 60, 4, 2)), dims=coords.keys(), coords=coords)
```

```
>>> # Cast to `MetdataArray` in order to interpolate
>>> from pycontrails import MetdataArray
>>> mda = MetdataArray(da)
>>> mda.interpolate(-11.4, 5.7, 234, np.datetime64("2021-08-01T13"))
array([0.52358215])
```

```
>>> mda.interpolate(-11.4, 5.7, 234, np.datetime64("2021-08-01T13"), method='nearest
↪')
array([0.4188465])
```

```
>>> da.sel(longitude=-11, latitude=6, level=240, time=np.datetime64("2021-08-01T12
↪")).item()
0.41884649899766946
```

### property binary

Determine if all data is a binary value (0, 1).



**Returns**

`bool` – True if all data values are binary value (0, 1)

**broadcast\_coords**(*name*)

Broadcast coordinates along other dimensions.

**Parameters**

**name** (`str`) – Coordinate/dimension name to broadcast. Can be a dimension or non-dimension coordinates.

**Returns**

`xarray.DataArray` – DataArray of the coordinate broadcasted along all other dimensions. The DataArray will have the same shape as the gridded data.

**cachestore**

Cache datastore to use for `save()` or `load()`

**copy()**

Create a copy of the current class.

**Returns**

`MetDataArray` – MetDataArray copy

**data**

DataArray or Dataset

**downselect**(*bbox*)

Downselect met data within spatial bounding box.

**Parameters**

**bbox** (`list[float]`) – List of coordinates defining a spatial bounding box in WGS84 coordinates. For 2D queries, list is [west, south, east, north]. For 3D queries, list is [west, south, min-level, east, north, max-level] with level defined in [*hPa*].

**Returns**

`MetBase` – Return downselected data

**find\_edges()**

Find edges of regions.

**Returns**

`MetDataArray` – MetDataArray with a binary field, 1 on the edge of the regions, 0 outside and inside the regions.

**Raises**

`NotImplementedError` – If the instance is not binary.

**property in\_memory**

Check if underlying *data* is loaded into memory.

This method uses protected attributes of underlying *xarray* objects, and may be subject to deprecation.

Changed in version 0.26.0: Rename from `is_loaded` to `in_memory`.

**Returns**

`bool` – If underlying data exists as an `np.ndarray` in memory.

**interpolate**(*longitude, latitude, level, time, \*, method='linear', bounds\_error=False, fill\_value=nan, localize=False, indices=None, return\_indices=False*)

Interpolate values over underlying DataArray.

Zero dimensional coordinates are reshaped to 1D arrays.

Method automatically loads underlying *data* into memory.

If `method == "nearest"`, the out array will have the same dtype as the underlying *data*.

If `method == "linear"`, the out array will be promoted to the most precise dtype of:

- underlying *data*
- `data.longitude`
- `data.latitude`
- `data.level`
- `longitude`
- `latitude`

New in version 0.24: This method can now handle singleton dimensions with `method == "linear"`. Previously these degenerate dimensions caused nan values to be returned.

#### Parameters

- **longitude** (`float` | `npt.NDArray[np.float64]`) – Longitude values to interpolate. Assumed to be 0 or 1 dimensional.
- **latitude** (`float` | `npt.NDArray[np.float64]`) – Latitude values to interpolate. Assumed to be 0 or 1 dimensional.
- **level** (`float` | `npt.NDArray[np.float64]`) – Level values to interpolate. Assumed to be 0 or 1 dimensional.
- **time** (`np.datetime64` | `npt.NDArray[np.datetime64]`) – Time values to interpolate. Assumed to be 0 or 1 dimensional.
- **method** (`str`, *optional*) – Additional keyword arguments to pass to `scipy.interpolate.RegularGridInterpolator`. Defaults to "linear".
- **bounds\_error** (`bool`, *optional*) – Additional keyword arguments to pass to `scipy.interpolate.RegularGridInterpolator`. Defaults to `False`.
- **fill\_value** (`float` | `np.float64`, *optional*) – Additional keyword arguments to pass to `scipy.interpolate.RegularGridInterpolator`. Set to `None` to extrapolate outside the boundary when `method` is `nearest`. Defaults to `np.nan`.
- **localize** (`bool`, *optional*) – Experimental. If `True`, downselect gridded data to smallest bounding box containing all points. By default `False`.
- **indices** (`tuple` | `None`, *optional*) – Experimental. See `interpolation.interp()`. `None` by default.
- **return\_indices** (`bool`, *optional*) – Experimental. See `interpolation.interp()`. `False` by default.

#### Returns

`numpy.ndarray` – Interpolated values

#### See also:

`GeoVectorDataset.intersect_met()`

## Examples

```
>>> from datetime import datetime
>>> import numpy as np
>>> import pandas as pd
>>> from pycontrails.datalib.ecmwf import ERA5
```

```
>>> times = (datetime(2022, 3, 1, 12), datetime(2022, 3, 1, 15))
>>> variables = "air_temperature"
>>> levels = [200, 250, 300]
>>> era5 = ERA5(times, variables, levels)
>>> met = era5.open_metdataset()
>>> mda = met["air_temperature"]
```

```
>>> # Interpolation at a grid point agrees with value
>>> mda.interpolate(1, 2, 300, np.datetime64('2022-03-01T14:00'))
array([241.91972984])
```

```
>>> da = mda.data
>>> da.sel(longitude=1, latitude=2, level=300, time=np.datetime64('2022-03-01T14
↪')).item()
241.9197298421629
```

```
>>> # Interpolation off grid
>>> mda.interpolate(1.1, 2.1, 290, np.datetime64('2022-03-01 13:10'))
array([239.83793798])
```

```
>>> # Interpolate along path
>>> longitude = np.linspace(1, 2, 10)
>>> latitude = np.linspace(2, 3, 10)
>>> level = np.linspace(200, 300, 10)
>>> time = pd.date_range("2022-03-01T14", periods=10, freq="5min")
>>> mda.interpolate(longitude, latitude, level, time)
array([[220.44347694, 223.08900738, 225.74338924, 228.41642088,
        231.10858599, 233.54857391, 235.71504913, 237.86478872,
        239.99274623, 242.10792167]])
```

**classmethod** `load(hash, cachestore=None, chunks=None)`

Load saved intermediate from `cachestore`.

### Parameters

- **hash** (`str`) – Saved hash to load.
- **cachestore** (`CacheStore`, *optional*) – Cache datastore to use for sourcing files. Defaults to `DiskCacheStore`.
- **chunks** (`dict[str, int]`, *optional*) – Chunks kwarg passed to `xarray.open_mfdataset()` when opening files.

### Returns

`MetdataArray` – New `MetdataArray` with loaded data.

### property name

Return the `DataArray` name.

**Returns**

Hashable – DataArray name

**property proportion**

Compute proportion of points with value 1.

**Returns**

float – Proportion of points with value 1

**Raises**

**NotImplementedError** – If instance does not contain binary data.

**save(\*\*kwargs)**

Save intermediate to *cachestore* as netcdf.

Load and restore using *load()*.

**Parameters**

**\*\*kwargs** (Any) – Keyword arguments passed directly to `xarray.save_mfdataset()`

**Returns**

list[str] – Returns filenames of saved files

**property shape**

Return the shape of the dimensions.

**Returns**

tuple[int, int, int, int] – Shape of underlying data

**property size**

Return the size of (each) array in underlying *data*.

**Returns**

int – Total number of grid points in underlying data

**to\_polygon\_feature**(*level=None, time=None, fill\_value=nan, iso\_value=None, min\_area=0.0, epsilon=0.0, lower\_bound=True, precision=None, interiors=True, convex\_hull=False, include\_altitude=False, properties=None*)

Create GeoJSON Feature artifact from spatial array on a single level and time slice.

Computed polygons always contain an exterior linear ring as defined by the *GeoJSON Polygon specification* <<https://www.rfc-editor.org/rfc/rfc7946.html#section-3.1.6>>. Polygons may also contain interior linear rings (holes). This method does not support nesting beyond the GeoJSON specification. See the *pycontrails.core.polygon* for additional polygon support.

Changed in version 0.25.12: Previous implementation include several additional parameters which have been removed:

- The `approximate` parameter
- An `path` parameter to save output as JSON
- Passing arbitrary kwargs to `skimage.measure.find_contours()`.

New implementation includes new parameters previously lacking:

- `fill_value`
- `min_area`
- `include_altitude`

Changed in version 0.38.0: Change default value of `epsilon` from 0.15 to 0.

Changed in version 0.41.0: Convert continuous fields to binary fields before computing polygons. The parameters `max_area` and `epsilon` are now expressed in terms of longitude/latitude units instead of pixels.

### Parameters

- **level** (`float`, *optional*) – Level slice to create polygons. If the “level” coordinate is length 1, then the single level slice will be selected automatically.
- **time** (`datetime`, *optional*) – Time slice to create polygons. If the “time” coordinate is length 1, then the single time slice will be selected automatically.
- **fill\_value** (`float`, *optional*) – Value used for filling missing data and for padding the underlying data array. Set to `np.nan` by default, which ensures that regions with missing data are never included in polygons.
- **iso\_value** (`float`, *optional*) – Value in field to create iso-surface. Defaults to the average of the min and max value of the array. (This is the same convention as used by `skimage`.)
- **min\_area** (`float`, *optional*) – Minimum area of each polygon. Polygons with area less than `min_area` are not included in the output. The unit of this parameter is in longitude/latitude degrees squared. Set to 0 to omit any polygon filtering based on a minimal area conditional. By default, 0.0.
- **epsilon** (`float`, *optional*) – Control the extent to which the polygon is simplified. A value of 0 does not alter the geometry of the polygon. The unit of this parameter is in longitude/latitude degrees. By default, 0.0.
- **lower\_bound** (`bool`, *optional*) – Whether to use `iso_value` as a lower or upper bound on values in polygon interiors. By default, True.
- **precision** (`int`, *optional*) – Number of decimal places to round coordinates to. If None, no rounding is performed.
- **interiors** (`bool`, *optional*) – If True, include interior linear rings (holes) in the output. True by default.
- **convex\_hull** (`bool`, *optional*) – EXPERIMENTAL. If True, compute the convex hull of each polygon. Only implemented for `depth=1`. False by default. A warning is issued if the underlying algorithm fails to make valid polygons after computing the convex hull.
- **include\_altitude** (`bool`, *optional*) – If True, include the array altitude [*m*] as a z-coordinate in the *GeoJSON output* <<https://www.rfc-editor.org/rfc/rfc7946#section-3.1.1>>. False by default.
- **properties** (`dict`, *optional*) – Additional properties to include in the GeoJSON output. By default, None.

### Returns

`dict[str, Any]` – Python representation of GeoJSON Feature with MultiPolygon geometry.

## Notes

Cocip and CocipGrid set some quantities to 0 and other quantities to `np.nan` in regions where no contrails form. When computing polygons from Cocip or CocipGrid output, take care that the choice of `fill_value` correctly includes or excludes contrail-free regions. See the Cocip documentation for details about `np.nan` in model output.

### See also:

`to_polyhedra()`, `pycontrails.core.polygons.find_multipolygons()`

## Examples

```
>>> from pprint import pprint
>>> from pycontrails.datalib.ecmwf import ERA5
>>> era5 = ERA5("2022-03-01", variables="air_temperature", pressure_levels=250)
>>> mda = era5.open_metdataset()["air_temperature"]
>>> mda.shape
(1440, 721, 1, 1)
```

```
>>> pprint(mda.to_polygon_feature(iso_value=239.5, precision=2, epsilon=0.1))
{'geometry': {'coordinates': [[[167.88, -22.5],
                               [167.75, -22.38],
                               [167.62, -22.5],
                               [167.75, -22.62],
                               [167.88, -22.5]]],
              [[43.38, -33.5],
               [43.5, -34.12],
               [43.62, -33.5],
               [43.5, -33.38],
               [43.38, -33.5]]]},
 'type': 'MultiPolygon'},
 'properties': {},
 'type': 'Feature'}
```

`to_polygon_feature_collection`(*time=None, fill\_value=nan, iso\_value=None, min\_area=0.0, epsilon=0.0, lower\_bound=True, precision=None, interiors=True, convex\_hull=False, include\_altitude=False, properties=None*)

Create GeoJSON FeatureCollection artifact from spatial array at time slice.

See the `to_polygon_feature()` method for a description of the parameters.

### Returns

`dict[str, Any]` – Python representation of GeoJSON FeatureCollection. This dictionary is comprised of individual GeoJSON Features, one per `self.data["level"]`.

`to_polyhedra`(\**time=None, iso\_value=0.0, simplify\_fraction=1.0, lower\_bound=True, return\_type='geojson', path=None, altitude\_scale=1.0, output\_vertex\_normals=False, closed=True*)

Create a collection of polyhedra from spatial array corresponding to a single time slice.

### Parameters

- **time** (`datetime`, *optional*) – Time slice to create mesh. If the “time” coordinate is length 1, then the single time slice will be selected automatically.

- **iso\_value** (*float, optional*) – Value in field to create iso-surface. Defaults to 0.
- **simplify\_fraction** (*float, optional*) – Apply *open3d simplify\_quadric\_decimation* method to simplify the polyhedra geometry. This parameter must be in the half-open interval (0.0, 1.0]. Defaults to 1.0, corresponding to no reduction.
- **lower\_bound** (*bool, optional*) – Whether to use *iso\_value* as a lower or upper bound on values in polyhedra interiors. By default, True.
- **return\_type** (*str, optional*) – Must be one of “geojson” or “mesh”. Defaults to “geojson”. If “geojson”, this method returns a dictionary representation of a geojson MultiPolygon object whose polygons are polyhedra faces. If “mesh”, this method returns an *open3d TriangleMesh* instance.
- **path** (*str, optional*) – Output geojson or mesh to file. If *return\_type* is “mesh”, see [Open3D File I/O for Mesh](#) for file type options.
- **altitude\_scale** (*float, optional*) – Rescale the altitude dimension of the mesh, [*m*]
- **output\_vertex\_normals** (*bool, optional*) – If path is defined, write out vertex normals. Defaults to False.
- **closed** (*bool, optional*) – If True, pad spatial array along all axes to ensure polyhedra are “closed”. This flag often gives rise to cleaner visualizations. Defaults to True.

**Returns**

dict | :class:`o3d.geometry.TriangleMesh` – Python representation of geojson object or [Open3D Triangle Mesh](#) depending on the *return\_type* parameter.

**Raises**

- **ModuleNotFoundError** – Method requires the *vis* optional dependencies
- **ValueError** – If input parameters are invalid.

**See also:**

`to_polygons()` [skimage.measure.marching\\_cubes](#)

**Notes**

Uses the [scikit-image Marching Cubes](#) algorithm to reconstruct a surface from the point-cloud like arrays.

**property values**

Return underlying numpy array.

This methods loads *data* if it is not already in memory.

**Returns**

`numpy.ndarray` – Underlying numpy array

**See also:**

- `meth:xr.Dataset.load`
- `meth:xr.DataArray.load`

**wrap\_longitude()**

Wrap longitude coordinates.

**Returns**

*MetdataArray* – Copy of MetdataArray with wrapped longitude values. Returns copy of current MetdataArray when longitude values are already wrapped

```
class pycontrails.core.met.MetDataset(data, cachestore=None, wrap_longitude=False, copy=True,
                                     attrs=None, **attrs_kwargs)
```

Bases: *MetBase*

Meteorological dataset with multiple variables.

Composition around xr.Dataset to enforce certain variables and dimensions for internal usage

**Parameters**

- **data** (*xarray.Dataset*) – *xarray.Dataset* containing meteorological variables and coordinates
- **cachestore** (*CacheStore*, *optional*) – Cache datastore for staging intermediates with *save()*. Defaults to None.
- **wrap\_longitude** (*bool*, *optional*) – Wrap data along the longitude dimension. If True, duplicate and shift longitude values (ie, -180 -> 180) to ensure that the longitude dimension covers the entire interval [-180, 180]. Defaults to False.
- **copy** (*bool*, *optional*) – Copy data on construction. Defaults to True.
- **attrs** (*dict[str, Any]*, *optional*) – Attributes to add to *data.attrs*. Defaults to None. Generally, pycontrails Models may use the following attributes:
  - **provider**: Name of the data provider (e.g. “ECMWF”).
  - **dataset**: Name of the dataset (e.g. “ERA5”).
  - **product**: Name of the product type (e.g. “reanalysis”).
- **\*\*attrs\_kwargs** (*Any*) – Keyword arguments to add to *data.attrs*. Defaults to None.

**Examples**

```
>>> import numpy as np
>>> import pandas as pd
>>> import xarray as xr
>>> from pycontrails.datalib.ecmwf import ERA5
```

```
>>> time = ("2022-03-01T00", "2022-03-01T02")
>>> variables = ["air_temperature", "specific_humidity"]
>>> pressure_levels = [200, 250, 300]
>>> era5 = ERA5(time, variables, pressure_levels)
```

```
>>> # Open directly as `MetDataset`
>>> met = era5.open_metdataset()
>>> # Use `data` attribute to access `xarray` object
>>> assert isinstance(met.data, xr.Dataset)
```



```
>>> # Alternatively, open with `xarray` and cast to `MetDataset`
>>> ds = xr.open_mfdataset(era5._cachepaths)
>>> met = MetDataset(ds)
```

```
>>> # Access sub-`DataArrays`
>>> mda = met["t"] # `MetDataArray` instance, needed for interpolation operations
>>> da = mda.data # Underlying `xarray` object
```

```
>>> # Check out a few values
>>> da[5:8, 5:8, 1, 1].values
array([[224.08959005, 224.41374427, 224.75945349],
       [224.09456429, 224.42037658, 224.76525676],
       [224.10036756, 224.42617985, 224.77106004]])
```

```
>>> # Mean temperature over entire array
>>> da.mean().load().item()
223.5083
```

### **broadcast\_coords**(*name*)

Broadcast coordinates along other dimensions.

#### **Parameters**

**name** (*str*) – Coordinate/dimension name to broadcast. Can be a dimension or non-dimension coordinates.

#### **Returns**

*xarray.DataArray* – DataArray of the coordinate broadcasted along all other dimensions. The DataArray will have the same shape as the gridded data.

### **cachestore**

Cache datastore to use for *save()* or *load()*

### **copy()**

Create a copy of the current class.

#### **Returns**

*MetDataset* – MetDataset copy

### **data**

DataArray or Dataset

### **property dataset\_attr**

Look up the ‘dataset’ attribute with a custom error message.

#### **Returns**

*str* – Dataset of the data. If not one of ‘ERA5’, ‘HRES’, ‘IFS’, or ‘GFS’, a warning is issued.

### **downselect**(*bbox*)

Downselect met data within spatial bounding box.

#### **Parameters**

**bbox** (*list[float]*) – List of coordinates defining a spatial bounding box in WGS84 coordinates. For 2D queries, list is [west, south, east, north]. For 3D queries, list is [west, south, min-level, east, north, max-level] with level defined in [*hPa*].

#### **Returns**

*MetBase* – Return downselected data

**ensure\_vars**(vars, raise\_error=True)

Ensure variables exist in xr.Dataset.

#### Parameters

- **vars** (MetVariable | str | Sequence[MetVariable | str | list[MetVariable]]) – List of MetVariable (or string key), or individual MetVariable (or string key). If vars contains an element with a list[MetVariable], then only one variable in the list must be present in dataset.
- **raise\_error** (bool, optional) – Raise KeyError if data does not contain variables. Defaults to True.

#### Returns

list[str] – List of met keys verified in MetDataset. Returns an empty list if any MetVariable is missing.

#### Raises

**KeyError** – Raises when dataset does not contain variable in vars

**classmethod from\_coords**(longitude, latitude, level, time)

Create a *MetDataset* containing a coordinate skeleton from coordinate arrays.

#### Parameters

- **longitude, latitude** (npt.ArrayLike | float) – Horizontal coordinates, in [deg]
- **level** (npt.ArrayLike | float) – Vertical coordinate, in [hPa]
- **time** (npt.ArrayLike | np.datetime64,) – Temporal coordinates, in [UTC]. Will be sorted.

#### Returns

*MetDataset* – MetDataset with no variables.

### Examples

```
>>> # Create skeleton MetDataset
>>> longitude = np.arange(0, 10, 0.5)
>>> latitude = np.arange(0, 10, 0.5)
>>> level = [250, 300]
>>> time = np.datetime64("2019-01-01")
>>> met = MetDataset.from_coords(longitude, latitude, level, time)
>>> met
MetDataset with data:
<xarray.Dataset> Size: 360B
Dimensions:      (longitude: 20, latitude: 20, level: 2, time: 1)
Coordinates:
  * longitude     (longitude) float64 160B 0.0 0.5 1.0 1.5 ... 8.0 8.5 9.0 9.5
  * latitude     (latitude) float64 160B 0.0 0.5 1.0 1.5 ... 8.0 8.5 9.0 9.5
  * level        (level) float64 16B 250.0 300.0
  * time         (time) datetime64[ns] 8B 2019-01-01
  air_pressure  (level) float32 8B 2.5e+04 3e+04
  altitude      (level) float32 8B 1.036e+04 9.164e+03
Data variables:
  *empty*
```

```
>>> met.shape
(20, 20, 2, 1)
```

```
>>> met.size
800
```

```
>>> # Fill it up with some constant data
>>> met["temperature"] = xr.DataArray(np.full(met.shape, 234.5), coords=met.
↳ coords)
>>> met["humidity"] = xr.DataArray(np.full(met.shape, 0.5), coords=met.coords)
>>> met
MetDataset with data:
<xarray.Dataset> Size: 13kB
Dimensions:      (longitude: 20, latitude: 20, level: 2, time: 1)
Coordinates:
  * longitude      (longitude) float64 160B 0.0 0.5 1.0 1.5 ... 8.0 8.5 9.0 9.5
  * latitude      (latitude) float64 160B 0.0 0.5 1.0 1.5 ... 8.0 8.5 9.0 9.5
  * level         (level) float64 16B 250.0 300.0
  * time          (time) datetime64[ns] 8B 2019-01-01
  air_pressure   (level) float32 8B 2.5e+04 3e+04
  altitude       (level) float32 8B 1.036e+04 9.164e+03
Data variables:
  temperature    (longitude, latitude, level, time) float64 6kB 234.5 ... 234.5
  humidity       (longitude, latitude, level, time) float64 6kB 0.5 0.5 ... 0.5
```

```
>>> # Convert to a GeoVectorDataset
>>> vector = met.to_vector()
>>> vector.dataframe.head()
longitude  latitude  level      time  temperature  humidity
0          0.0      0.0  250.0  2019-01-01    234.5     0.5
1          0.0      0.0  300.0  2019-01-01    234.5     0.5
2          0.0      0.5  250.0  2019-01-01    234.5     0.5
3          0.0      0.5  300.0  2019-01-01    234.5     0.5
4          0.0      1.0  250.0  2019-01-01    234.5     0.5
```

**classmethod** `from_zarr(store, **kwargs)`

Create a *MetDataset* from a path to a Zarr store.

#### Parameters

- **store** (Any) – Path to Zarr store. Passed into `xarray.open_zarr()`.
- **\*\*kwargs** (Any) – Other keyword only arguments passed into `xarray.open_zarr()`.

#### Returns

*MetDataset* – MetDataset with data from Zarr store.

**get**(key, default\_value=None)

Shortcut to `data.get(k, v)` method.

#### Parameters

- **key** (str) – Key to get from *data*
- **default\_value** (Any, optional) – Return *default\_value* if *key* not in *data*, by default *None*

**Returns**

Any – Values returned from `data.get(key, default_value)`

**classmethod** `load(hash, cachestore=None, chunks=None)`

Load saved intermediate from `cachestore`.

**Parameters**

- **hash** (`str`) – Saved hash to load.
- **cachestore** (`CacheStore`, *optional*) – Cache datastore to use for sourcing files. Defaults to `DiskCacheStore`.
- **chunks** (`dict[str: int]`, *optional*) – Chunks kwarg passed to `xarray.open_mfdataset()` when opening files.

**Returns**

`MetDataset` – New `MetDataArray` with loaded data.

**property** `product_attr`

Look up the ‘product’ attribute with a custom error message.

**Returns**

`str` – Product of the data. If not one of ‘forecast’, ‘ensemble’, or ‘reanalysis’, a warning is issued.

**property** `provider_attr`

Look up the ‘provider’ attribute with a custom error message.

**Returns**

`str` – Provider of the data. If not one of ‘ECMWF’ or ‘NCEP’, a warning is issued.

**save(\*\*kwargs)**

Save intermediate to `cachestore` as netcdf.

Load and restore using `load()`.

**Parameters**

**\*\*kwargs** (Any) – Keyword arguments passed directly to `xarray.Dataset.to_netcdf()`

**Returns**

`list[str]` – Returns filenames saved

**property** `shape`

Return the shape of the dimensions.

**Returns**

`tuple[int, int, int, int]` – Shape of underlying data

**property** `size`

Return the size of (each) array in underlying `data`.

**Returns**

`int` – Total number of grid points in underlying data

**standardize\_variables(variables)**

Standardize variables **in-place**.

**Parameters**

**variables** (`Iterable[MetVariable]`) – Data source variables

**See also:**

`standardize_variables()`

**to\_vector**(*transfer\_attrs=True*)

Convert a *MetDataset* to a *GeoVectorDataset* by raveling data.

If *data* is lazy, it will be loaded.

**Parameters**

**transfer\_attrs** (*bool*, *optional*) – Transfer attributes from *data* to output *GeoVectorDataset*. By default, *True*, meaning that attributes are transferred.

**Returns**

*GeoVectorDataset* – Converted *GeoVectorDataset*. The variables on the returned instance include all of those on the input instance, plus the four core spatial temporal variables.

**Examples**

```
>>> from pycontrails.datalib.ecmwf import ERA5
>>> times = "2022-03-01", "2022-03-01T01"
>>> variables = ["air_temperature", "specific_humidity"]
>>> levels = [250, 200]
>>> era5 = ERA5(time=times, variables=variables, pressure_levels=levels)
>>> met = era5.open_metdataset()
>>> met.to_vector(transfer_attrs=False)
GeoVectorDataset [6 keys x 4152960 length, 1 attributes]
  Keys: longitude, latitude, level, time, air_temperature, ..., specific_
↳ humidity
  Attributes:
  time          [2022-03-01 00:00:00, 2022-03-01 01:00:00]
  longitude     [-180.0, 179.75]
  latitude     [-90.0, 90.0]
  altitude     [10362.8, 11783.9]
  crs          EPSG:4326
```

**update**(*other=None, \*\*kwargs*)

Shortcut to *data.update()*.

See *xarray.Dataset.update()* for reference.

**Parameters**

- **other** (*MutableMapping*) – Variables with which to update this dataset
- **\*\*kwargs** (*Any*) – Variables defined by keyword arguments. If a variable exists both in *other* and as a keyword argument, the keyword argument takes precedence.

**See also:**

–  
meth:*xarray.Dataset.update*

**wrap\_longitude**()

Wrap longitude coordinates.

**Returns**

*MetDataset* – Copy of *MetDataset* with wrapped longitude values. Returns copy of current *MetDataset* when longitude values are already wrapped

`pycontrails.core.met.downselect(data, bbox)`

Downselect `xr.Dataset` or `xr.DataArray` with spatial bounding box.

**Parameters**

- **data** (`XArrayType`) – `xr.Dataset` or `xr.DataArray` to downselect
- **bbox** (`tuple[float, ]`) – Tuple of coordinates defining a spatial bounding box in WGS84 coordinates.
  - For 2D queries, `bbox` takes the form (`west`, `south`, `east`, `north`)
  - For 3D queries, `bbox` takes the form (`west`, `south`, `min-level`, `east`, `north`, `max-level`)with level defined in [`hPa`].

**Returns**

`XArrayType` – Downselected `xr.Dataset` or `xr.DataArray`

**Raises**

**ValueError** – If parameter `bbox` has wrong length.

`pycontrails.core.met.originates_from_ecmwf(met)`

Check if data appears to have originated from an ECMWF source.

New in version 0.27.0: Experimental. Implementation is brittle.

**Parameters**

**met** (`MetDataset` | `MetDataArray`) – Dataset or array to inspect.

**Returns**

`bool` – True if data appears to be derived from an ECMWF source.

**See also:**

- `class:ERA5`
- `class:HRES`

`pycontrails.core.met.shift_longitude(data, bound=-180.0)`

Shift longitude values from any input domain to [`bound`, `360 + bound`) domain.

Sorts data by ascending longitude values.

**Parameters**

- **data** (`XArrayType`) – `xr.Dataset` or `xr.DataArray` with longitude dimension
- **bound** (`float, optional`) – Lower bound of the domain. Output domain will be [`bound`, `360 + bound`). Defaults to `-180`, which results in longitude domain [`-180`, `180`).

**Returns**

`XArrayType` – `xr.Dataset` or `xr.DataArray` with longitude values on [`a`, `360 + a`).

`pycontrails.core.met.standardize_variables(ds, variables)`

Rename all variables in dataset from short name to standard name.

This function does not change any variables in `ds` that are not found in `variables`.

When there are multiple variables with the same short name, the last one is used.

**Parameters**

- **ds** (DatasetType) – An `xr.Dataset` or `MetDataset`. When a `MetDataset` is passed, the underlying `xr.Dataset` is modified in place.
- **variables** (Iterable[MetVariable]) – Data source variables

**Returns**

DatasetType – Dataset with variables renamed to standard names

## 11.6.10 pycontraits.core.met\_var

Module containing core met variables.

**Classes**

|                                                             |                                                            |
|-------------------------------------------------------------|------------------------------------------------------------|
| <code>MetVariable</code> (short_name, standard_name[, ...]) | Met variable defined using CF, ECMWF, and WMO conventions. |
|-------------------------------------------------------------|------------------------------------------------------------|

```
class pycontraits.core.met_var.MetVariable(short_name, standard_name, long_name=None,
                                           level_type=None, ecmwf_id=None, grib1_id=None,
                                           grib2_id=None, units=None, amip=None,
                                           description=None)
```

Bases: `object`

Met variable defined using CF, ECMWF, and WMO conventions.

When there is a conflict between CF, ECMWF, and WMO conventions, CF takes precedence, then WMO, then ECMWF.

**References**

- [CF Standard Names, version 77](#)
- [ECMWF Parameter Database](#)
- [NCEP Grib v1 Code Table](#)
- [WMO Codes Registry, Grib Edition 2](#)
- [NCEP Grib v2 Code Table](#)

Used for defining support parameters in a grib-like fashion.

**amip = None**

AMIP identifier, if defined.

**property attrs**

Return a dictionary of met variable attributes.

Compatible with `xr.Dataset` or `xr.DataArray` attrs.

**Returns**

`dict[str, str]` – Dictionary with `MetVariable` attributes.

**description = None**

Description

**ecmwf\_id = None**

ECMWF Grib variable id, if defined. See [ECMWF Parameter Database](#)

**property ecmwf\_link**

Database link in the ECMWF Parameter Database if *ecmwf\_id* is defined.

**Returns**

`str` – Database link in the ECMWF Parameter Database

**grib1\_id = None**

WMO Grib v1 variable id, if defined. See [WMO Codes Registry, Grib Edition 1 and CF Standard Names, version 77](#) # noqa: E501

**grib2\_id = None**

WMO Grib 2 variable id, if defined. See [WMO Codes Registry, Grib Edition 2](#) Tuple represents (discipline, category, number)

**level\_type = None**

Level type One of “surface”, “isobaricInhPa”, “nominalTop”

**long\_name = None**

Long variable name.

**short\_name**

Short variable name. Chosen for greatest consistency between data sources.

**standard\_name**

CF standard name, if defined. Otherwise a standard name is chosen for consistency.

**units = None**

Canonical CF units, if defined.

## 11.6.11 pycontrails.core.models

Physical model data structures.

### Module Attributes

|                    |                              |
|--------------------|------------------------------|
| <i>ModelInput</i>  | Model input source types     |
| <i>ModelOutput</i> | Model output source types    |
| <i>SourceType</i>  | Model attribute source types |



## Functions

|                                                              |                                                                                        |
|--------------------------------------------------------------|----------------------------------------------------------------------------------------|
| <code>interpolate_gridded_specific_humidity(mda, ...)</code> | Interpolate specific humidity against vector with experimental <code>q_method</code> . |
| <code>interpolate_met(met, vector, met_key[, ...])</code>    | Interpolate vector against <code>met</code> gridded data.                              |
| <code>raise_invalid_q_method_error(q_method)</code>          | Raise error for invalid <code>q_method</code> .                                        |
| <code>update_param_dict(param_dict, new_params)</code>       | Update parameter dictionary in place.                                                  |

## Classes

|                                              |                                          |
|----------------------------------------------|------------------------------------------|
| <code>Model([met, params])</code>            | Base class for physical models.          |
| <code>ModelParams([copy_source, ...])</code> | Class for constructing model parameters. |

**class** `pycontrails.core.models.Model`(*met=None, params=None, \*\*params\_kwargs*)

Bases: `ABC`

Base class for physical models.

Implementing classes must implement the `eval()` method

### default\_params

Default model parameter dataclass

alias of `ModelParams`

### downselect\_met()

Downselect `met` domain to the max/min bounds of `source`.

Override this method if special handling is needed in `met` down-selection.

- `source` must be defined before calling `downselect_met()`.
- This method copies and re-assigns `met` using `met.copy()` to avoid side-effects.

### Raises

- **ValueError** – Raised if `source` is not defined. Raised if `source` is not a `GeoVectorDataset`.
- **TypeError** – Raised if `met` is not a `MetDataset`.

**abstract** `eval`(*source=None, \*\*params*)

Abstract method to handle evaluation.

Implementing classes should override call signature to overload `source` inputs and model outputs.

### Parameters

- **source** (`ModelInput`, *optional*) – Dataset defining coordinates to evaluate model. Defined by implementing class, but must be a subset of `ModelInput`. If `None`, `met` is assumed to be evaluation points.
- **\*\*params** (Any) – Overwrite model parameters before evaluation.

### Returns

`ModelOutput` – Return type depends on implementing model

**get\_source\_param**(*key*, *default=<object object>*, \*, *set\_attr=True*)

Get source data with default set by parameter key.

Retrieves data with the following hierarchy:

1. `source.data[key]`. Returns `np.ndarray` | `xr.DataArray`.
2. `source.attrs[key]`
3. `params[key]`
4. `default`

In case 3., the value of `params[key]` is attached to `source.attrs[key]`.

#### Parameters

- **key** (`str`) – Key to retrieve
- **default** (*Any, optional*) – Default value if key is not found.
- **set\_attr** (`bool, optional`) – If True (default), set `source.attrs[key]` to `params[key]` if found. This allows for better post model evaluation tracking.

#### Returns

Any – Value(s) found for key in source data, source attrs, or model params

#### Raises

**KeyError** – Raises `KeyError` if key is not found in any location and `default` is not provided.

#### See also:

-

#### property hash

Generate a unique hash for model instance.

#### Returns

`str` – Unique hash for model instance (sha1)

#### property interp\_kwargs

Shortcut to create interpolation arguments from *params*.

#### Returns

`dict[str, Any]` – Dictionary with keys

- "method"
- "bounds\_error"
- "fill\_value"
- "localize"
- "use\_indices"
- "q\_method"

as determined by *params*.

#### abstract property long\_name

Get long name descriptor, annotated on `xr.DataArray` outputs.

#### met

Meteorology data

**met\_required = False**

Require meteorology is not None on `__init__()`

**met\_variables**

Required meteorology pressure level variables. Each element in the list is a `MetVariable` or a `tuple[MetVariable]`. If element is a `tuple[MetVariable]`, the variable depends on the data source. Only one variable in the tuple is required.

**abstract property name**

class `Flight``.

**Type**

Get model name for use as a data key in `xr.DataArray` or

**optional\_met\_variables**

Optional meteorology variables

**params**

Instantiated model parameters, in dictionary form

**processed\_met\_variables**

Set of required parameters if processing already complete on `met` input.

**require\_met()**

Ensure that `met` is a `MetDataset`.

**Returns**

`MetDataset` – Returns reference to `met`. This is helpful for type narrowing `met` when meteorology is required.

**Raises**

`ValueError` – Raises when `met` is None.

**require\_source\_type(type\_)**

Ensure that `source` is `type_`.

**Returns**

`_Source` – Returns reference to `source`. This is helpful for type narrowing `source` to specific type(s).

**Raises**

`ValueError` – Raises when `source` is not `_type_`.

**set\_source(source=None)**

Attach original or copy of input source to `source`.

**Parameters**

`source` (`MetDataset` | `GeoVectorDataset` | `Flight` | `Iterable[Flight]` | `None`) – Parameter source passed in `eval()`. If None, an empty `MetDataset` with coordinates like `met` is set to `source`.

**See also:**

-

meth:`eval`

**set\_source\_met**(*optional=False, variable=None*)

Ensure or interpolate each required *met\_variables* on *source*.

For each variable in *met\_variables*, check *source* for data variable with the same name.

For GeoVectorDataset sources, try to interpolate *met* if variable does not exist.

For MetDataset sources, try to get data from *met* if variable does not exist.

#### Parameters

- **optional** (*bool, optional*) – Include *optional\_met\_variables*
- **variable** (*MetVariable | Sequence[MetVariable] | None, optional*) – MetVariable to set, from *met\_variables*. If None, set all variables in *met\_variables* and *optional\_met\_variables* if *optional* is True.

#### Raises

- **ValueError** – Variable does not exist and *source* is a MetDataset.
- **KeyError** – Variable not found in *source* or *met*.

#### source

Data evaluated in model

**transfer\_met\_source\_attrs**(*source=None*)

Transfer met source metadata from *met* to *source*.

**update\_params**(*params=None, \*\*params\_kwargs*)

Update model parameters on *params*.

#### Parameters

- **params** (*dict[str, Any], optional*) – Model parameters to update, as dictionary. Defaults to {}
- **\*\*params\_kwargs** (*Any*) – Override keys in *params* with keyword arguments.

`pycontrails.core.models.ModelInput`

Model input source types

alias of `Optional[Union[MetDataset, GeoVectorDataset, Flight, Sequence[Flight]]]`

`pycontrails.core.models.ModelOutput`

Model output source types

alias of `Union[MetdataArray, MetDataset, GeoVectorDataset, Flight, list[Flight], NoReturn]`

```
class pycontrails.core.models.ModelParams(copy_source=True, interpolation_method='linear',
interpolation_bounds_error=False,
interpolation_fill_value=nan, interpolation_localize=False,
interpolation_use_indices=False,
interpolation_q_method=None, verify_met=True,
downselect_met=True, met_longitude_buffer=(0.0, 0.0),
met_latitude_buffer=(0.0, 0.0), met_level_buffer=(0.0, 0.0),
met_time_buffer=(numpy.timedelta64(0, 'h'),
numpy.timedelta64(0, 'h')))
```

Bases: `object`

Class for constructing model parameters.

Implementing classes must still use the `@dataclass` operator.

**as\_dict()**

Convert object to dictionary.

We use this method instead of *dataclasses.asdict* to use a shallow/unrecursive copy. This will return values as Any instead of dict.

**Returns**

dict[str, Any] – Dictionary version of self.

**copy\_source = True**

Copy input source data on eval

**downselect\_met = True**

Downselect input MetDataset` to region around source.

**interpolation\_bounds\_error = False**

If True, points lying outside interpolation will raise an error

**interpolation\_fill\_value = nan**

Used for outside interpolation value if *interpolation\_bounds\_error* is False

**interpolation\_localize = False**

Experimental. See *pycontrails.core.interpolation*.

**interpolation\_method = 'linear'**

Interpolation method. Supported methods include “linear”, “nearest”, “slinear”, “cubic”, and “quintic”. See *scipy.interpolate.RegularGridInterpolator* for the description of each method. Not all methods are supported by all met grids. For example, the “cubic” method requires at least 4 points per dimension.

**interpolation\_q\_method = None**

Experimental. Alternative interpolation method to account for specific humidity lapse rate bias. Must be one of None, "cubic-spline", or "log-q-log-p". If None, no special interpolation is used for specific humidity. The "cubic-spline" method applies a custom stretching of the met interpolation table to account for the specific humidity lapse rate bias. The "log-q-log-p" method interpolates in the log of specific humidity and pressure, then converts back to specific humidity. Only used by models calling to *interpolate\_met()*.

**interpolation\_use\_indices = False**

Experimental. See *pycontrails.core.interpolation*.

**met\_latitude\_buffer = (0.0, 0.0)**

Met latitude buffer for input to *Flight.downselect\_met()*, in WGS84 coordinates. Only applies when *downselect\_met* is True.

**met\_level\_buffer = (0.0, 0.0)**

Met level buffer for input to *Flight.downselect\_met()*, in [hPa]. Only applies when *downselect\_met* is True.

**met\_longitude\_buffer = (0.0, 0.0)**

Met longitude buffer for input to *Flight.downselect\_met()*, in WGS84 coordinates. Only applies when *downselect\_met* is True.

**met\_time\_buffer = (numpy.timedelta64(0, 'h'), numpy.timedelta64(0, 'h'))**

Met time buffer for input to *Flight.downselect\_met()* Only applies when *downselect\_met* is True.

**verify\_met = True**

Call *\_verify\_met()* on model instantiation.

`pycontrails.core.models.SourceType`

Model attribute source types

alias of `Union[MetDataset, GeoVectorDataset, Flight, Fleet]`

`pycontrails.core.models.interpolate_gridded_specific_humidity(mda, vector, q_method, log_applied, **interp_kwargs)`

Interpolate specific humidity against vector with experimental q\_method.

**Parameters**

- **mda** (*MetDataArray*) – MetDataArray of specific humidity.
- **vector** (*GeoVectorDataset*) – Flight or GeoVectorDataset instance
- **q\_method** (`{None, "cubic-spline", "log-q-log-p"}`) – Experimental method to use for interpolating specific humidity.
- **log\_applied** (`bool`) – Whether or not a log transform was applied to specific humidity.
- **\*\*interp\_kwargs** (`Any, ...`) – Additional keyword only arguments passed to *intersect\_met*.

**Returns**

`numpy.ndarray` – Interpolated values.

`pycontrails.core.models.interpolate_met(met, vector, met_key, vector_key=None, q_method=None, **interp_kwargs)`

Interpolate vector against met gridded data.

If `vector_key` (`=`met_key`` by default) already exists, return values at `vector_key`.

Mutates parameter vector in place by attaching new key and returns values.

**Parameters**

- **met** (`MetDataset | None`) – Met data to interpolate against
- **vector** (*GeoVectorDataset*) – Flight or GeoVectorDataset instance
- **met\_key** (`str`) – Key of met variable in met.
- **vector\_key** (`str, optional`) – Key of variable to attach to vector. By default, use `met_key`.
- **q\_method** (`str, optional`) – Experimental method to use for interpolating specific humidity. See *ModelParams* for more information.
- **\*\*interp\_kwargs** (`Any, ...`) – Additional keyword only arguments passed to `GeoVectorDataset.intersect_met()`. For example, `level=[...]`.

**Returns**

`npt.NDArray[np.float64]` – Interpolated values.

**Raises**

**KeyError** – Parameter `met_key` not found in met.

`pycontrails.core.models.raise_invalid_q_method_error(q_method)`

Raise error for invalid q\_method.

**Parameters**

**q\_method** (`str`) – q\_method to raise error for.

**Raises**

**ValueError** – q\_method is not one of `None`, `"log-q-log-p"`, or `"cubic-spline"`.

`pycontrails.core.models.update_param_dict(param_dict, new_params)`

Update parameter dictionary in place.

#### Parameters

- **param\_dict** (`dict[str, Any]`) – Active model parameter dictionary
- **new\_params** (`dict[str, Any]`) – Model parameters to update, as a dictionary

#### Raises

**KeyError** – Raises when `new_params` key is not found in `param_dict`

## 11.6.12 pycontrails.core.polygon

Algorithm support for grid to polygon conversion.

See also:

`pycontrails.MetaDataArray.to_polygon_feature()`,  
`to_polygon_feature_collection()`

`pycontrails.MetaDataArray.`

### Functions

|                                                               |                                                                      |
|---------------------------------------------------------------|----------------------------------------------------------------------|
| <code>buffer_and_clean(contour, min_area, ...)</code>         | Buffer and clean a contour.                                          |
| <code>determine_buffer(longitude, latitude)</code>            | Determine the proper buffer size to use when converting to polygons. |
| <code>find_multipolygon(arr, threshold, min_area, ...)</code> | Compute a multipolygon from a 2d array.                              |
| <code>multipolygon_to_geojson(multipolygon, altitude)</code>  | Convert a shapely multipolygon to a GeoJSON feature.                 |

`pycontrails.core.polygon.buffer_and_clean(contour, min_area, convex_hull, epsilon, precision, buffer, is_exterior)`

Buffer and clean a contour.

#### Parameters

- **contour** (`npt.NDArray[np.float64]`) – Contour to buffer and clean. A 2d array of shape  $(n, 2)$  where  $n$  is the number of vertices in the contour.
- **min\_area** (`float`) – Minimum area of the polygon. If the area of the buffered contour is less than this, return `None`.
- **convex\_hull** (`bool`) – Whether to take the convex hull of the buffered contour.
- **epsilon** (`float`) – Epsilon value for polygon simplification. If 0, no simplification is performed.
- **precision** (`int | None`) – Precision of the output polygon. If `None`, no rounding is performed.
- **buffer** (`float`) – Buffer distance.
- **is\_exterior** (`bool, optional`) – Whether the contour is an exterior contour. If `True`, the contour is buffered with a larger buffer distance. The polygon orientation is CCW iff this is `True`.

#### Returns

`shapely.Polygon | None` – Buffered and cleaned polygon. If the area of the buffered contour is less than `min_area`, return `None`.

`pycontrails.core.polygon.determine_buffer(longitude, latitude)`

Determine the proper buffer size to use when converting to polygons.

`pycontrails.core.polygon.find_multipolygon(arr, threshold, min_area, epsilon, lower_bound=True, interiors=True, convex_hull=False, longitude=None, latitude=None, precision=None)`

Compute a multipolygon from a 2d array.

#### Parameters

- **arr** (`npt.NDArray[np.float64]`) – Array to convert to a multipolygon. The array will be converted to a binary array by comparing each element to `threshold`. This binary array is then passed into `cv2.findContours()` to find the contours.
- **threshold** (`float`) – Threshold to use when converting `arr` to a binary array.
- **min\_area** (`float`) – Minimum area of a polygon to be included in the output.
- **epsilon** (`float`) – Epsilon value to use when simplifying the polygons. Passed into shapely’s `shapely.geometry.Polygon.simplify()` method.
- **lower\_bound** (`bool, optional`) – Whether to treat `threshold` as a lower or upper bound on values in polygon interiors. By default, `True`.
- **interiors** (`bool, optional`) – Whether to include interior polygons. By default, `True`.
- **convex\_hull** (`bool, optional`) – Experimental. Whether to take the convex hull of each polygon. By default, `False`.
- **longitude** (`npt.NDArray[np.float64] | None, optional`) – If provided, the coordinates values corresponding to the longitude dimensions of `arr`. The contour coordinates will be converted to longitude-latitude values by indexing into this array. Defaults to `None`.
- **latitude** (`npt.NDArray[np.float64] | None, optional`) – If provided, the coordinates values corresponding to the latitude dimensions of `arr`.
- **precision** (`int | None, optional`) – If provided, the precision to use when rounding the coordinates. Defaults to `None`.

#### Returns

`shapely.MultiPolygon` – A multipolygon of the contours.

#### Raises

`ValueError` – If `arr` is not 2d.

`pycontrails.core.polygon.multipolygon_to_geojson(multipolygon, altitude, properties=None)`

Convert a shapely multipolygon to a GeoJSON feature.

#### Parameters

- **multipolygon** (`shapely.MultiPolygon`) – Multipolygon to convert.
- **altitude** (`float | None`) – Altitude of the multipolygon. If provided, the multipolygon coordinates will be given a z-coordinate.
- **properties** (`dict[str, Any] | None, optional`) – Properties to add to the GeoJSON feature.

#### Returns

`dict[str, Any]` – GeoJSON feature with geometry type “MultiPolygon”.



### 11.6.13 pycontrails.core.vector

Lightweight data structures for vector paths.

#### Module Attributes

|                                |              |
|--------------------------------|--------------|
| <code>VectorDatasetType</code> | Vector types |
|--------------------------------|--------------|

#### Functions

|                                                             |                                               |
|-------------------------------------------------------------|-----------------------------------------------|
| <code>vector_to_lon_lat_grid</code> (vector, agg, *[, ...]) | Convert vectors to a longitude-latitude grid. |
|-------------------------------------------------------------|-----------------------------------------------|

#### Classes

|                                                        |                                                                          |
|--------------------------------------------------------|--------------------------------------------------------------------------|
| <code>AttrDict</code>                                  | Thin wrapper around dict to warn when setting a key that already exists. |
| <code>GeoVectorDataset</code> ([data, longitude, ...]) | Base class to hold 1D geospatial arrays of consistent size.              |
| <code>VectorDataDict</code> ([data])                   | Thin wrapper around dict[str, np.ndarray] to ensure consistency.         |
| <code>VectorDataset</code> ([data, attrs, copy])       | Base class to hold 1D arrays of consistent size.                         |

#### `class pycontrails.core.vector.AttrDict`

Bases: `dict[str, Any]`

Thin wrapper around dict to warn when setting a key that already exists.

**setdefault**(k, default=None)

Thin wrapper around dict.setdefault.

Overwrites value if value is None.

##### Parameters

- **k** (`str`) – Key
- **default** (`Any`, optional) – Default value for key k

##### Returns

Any – Value at k

**class pycontrails.core.vector.GeoVectorDataset**(data=None, \*, longitude=None, latitude=None, altitude=None, altitude\_ft=None, level=None, time=None, attrs=None, copy=True, \*\*attrs\_kwargs)

Bases: `VectorDataset`

Base class to hold 1D geospatial arrays of consistent size.

GeoVectorDataset is required to have geospatial coordinate keys defined in `required_keys`.

Expect latitude-longitude CRS in WGS 84. Expect altitude in [m]. Expect level in [hPa].

Each spatial variable is expected to have “float32” or “float64” dtype. The time variable is expected to have “datetime64[ns]” dtype.

Use the attribute `attr["crs"]` to specify coordinate reference system using [PROJ](#) or [EPSG](#) syntax.

### Parameters

- **data** (`dict[str, npt.ArrayLike] | pd.DataFrame | VectorDataDict | VectorDataset | None, optional`) – Data dictionary or `pandas.DataFrame`. Must include keys/columns `time`, `latitude`, `longitude`, `altitude` or `level`. Keyword arguments for `time`, `latitude`, `longitude`, `altitude` or `level` override data inputs. Expects `altitude` in meters and `time` as a `DatetimeLike` (or array that can be processed with `pd.to_datetime()`). Additional waypoint-specific data can be included as additional keys/columns.
- **longitude** (`npt.ArrayLike, optional`) – Longitude data. Defaults to `None`.
- **latitude** (`npt.ArrayLike, optional`) – Latitude data. Defaults to `None`.
- **altitude** (`npt.ArrayLike, optional`) – Altitude data, [*m*]. Defaults to `None`.
- **altitude\_ft** (`npt.ArrayLike, optional`) – Altitude data, [*ft*]. Defaults to `None`.
- **level** (`npt.ArrayLike, optional`) – Level data, [*hPa*]. Defaults to `None`.
- **time** (`npt.ArrayLike, optional`) – Time data. Expects an array of `DatetimeLike` values, or array that can be processed with `pd.to_datetime()`. Defaults to `None`.
- **attrs** (`dict[Hashable, Any] | AttrDict, optional`) – Additional properties as a dictionary. Defaults to `{}`.
- **copy** (`bool, optional`) – Copy data on class creation. Defaults to `True`.
- **\*\*attrs\_kwargs** (`Any`) – Additional properties passed as keyword arguments.

### Raises

**KeyError** – Raises if data input does not contain at least `time`, `latitude`, `longitude`, (`altitude` or `level`).

### T\_isa()

Calculate the ICAO standard atmosphere temperature at each point.

#### Returns

`npt.NDArray[np.float64]` – ISA temperature, [*K*]

#### See also:

`pycontrails.physics.units.m_to_T_isa()`

### property air\_pressure

Get `air_pressure` values for points.

#### Returns

`npt.NDArray[np.float64]` – Point air pressure values, [*Pa*]

### property altitude

Get altitude.

Automatically calculates altitude using `units.pl_to_m()` using `level` key.

Note that if `altitude` key exists in data, the data at the `altitude` key will be returned. This allows an override of the default calculation of altitude from pressure level.

#### Returns

`npt.NDArray[np.float64]` – Altitude, [*m*]

**property altitude\_ft**

Get altitude in feet.

**Returns**

`npt.NDArray[np.float64]` – Altitude, [*ft*]

**property constants**

Return a dictionary of constant attributes and data values.

Includes `attrs` and values from columns in `data` with a unique value.

**Returns**

`dict[str, Any]` – Properties and their constant values

**property coords**

Get geospatial coordinates for compatibility with `MetdataArray`.

**Returns**

`pandas.DataFrame` – `pd.DataFrame` with columns *longitude*, *latitude*, *level*, and *time*.

**coords\_intersect\_met(*met*)**

Return boolean mask of data inside the bounding box defined by `met`.

**Parameters**

**met** (`MetDataset` | `MetdataArray`) – `MetDataset` or `MetdataArray` to compare.

**Returns**

`npt.NDArray[np.bool_]` – True if point is inside the bounding box defined by `met`.

**classmethod create\_empty(*keys=None, attrs=None, \*\*attrs\_kwargs*)**

Create instance with variables defined by *keys* and size 0.

If instance requires additional variables to be defined, these keys will automatically be attached to returned instance.

**Parameters**

- **keys** (`Iterable[str]`) – Keys to include in empty `VectorDataset` instance.
- **attrs** (`dict[str, Any]` | `None`, *optional*) – Attributes to attach instance.
- **\*\*attrs\_kwargs** (`Any`) – Define attributes as keyword arguments.

**Returns**

`VectorDatasetType` – Empty `VectorDataset` instance.

**downselect\_met(*met, \*, longitude\_buffer=(0.0, 0.0), latitude\_buffer=(0.0, 0.0), level\_buffer=(0.0, 0.0), time\_buffer=(numpy.timedelta64(0, 'h'), numpy.timedelta64(0, 'h')), copy=True*)**

Downselect `met` to encompass a spatiotemporal region of the data.

**Parameters**

- **met** (`MetDataset` | `MetdataArray`) – `MetDataset` or `MetdataArray` to downselect.
- **longitude\_buffer** (`tuple[float, float]`, *optional*) – Extend longitude domain past by `longitude_buffer[0]` on the low side and `longitude_buffer[1]` on the high side. Units must be the same as class coordinates. Defaults to `(0, 0)` degrees.
- **latitude\_buffer** (`tuple[float, float]`, *optional*) – Extend latitude domain past by `latitude_buffer[0]` on the low side and `latitude_buffer[1]` on the high side. Units must be the same as class coordinates. Defaults to `(0, 0)` degrees.

- **level\_buffer** (tuple[float, float], *optional*) – Extend level domain past by level\_buffer[0] on the low side and level\_buffer[1] on the high side. Units must be the same as class coordinates. Defaults to (0, 0) [hPa].
- **time\_buffer** (tuple[np.timedelta64, np.timedelta64], *optional*) – Extend time domain past by time\_buffer[0] on the low side and time\_buffer[1] on the high side. Units must be the same as class coordinates. Defaults to (np.timedelta64(0, "h"), np.timedelta64(0, "h")).
- **copy** (bool) – If returned object is a copy or view of the original. True by default.

**Returns**

MetDataset | MetdataArray – Copy of downselected MetDataset or MetdataArray.

**intersect\_met**(mda, \*, longitude=None, latitude=None, level=None, time=None, use\_indices=False, \*\*interp\_kwargs)

Intersect waypoints with MetdataArray.

**Parameters**

- **mda** (*MetdataArray*) – MetdataArray containing a meteorological variable at spatio-temporal coordinates.
- **longitude** (npt.NDArray[np.float64], *optional*) – Override existing coordinates for met interpolation
- **latitude** (npt.NDArray[np.float64], *optional*) – Override existing coordinates for met interpolation
- **level** (npt.NDArray[np.float64], *optional*) – Override existing coordinates for met interpolation
- **time** (npt.NDArray[np.datetime64], *optional*) – Override existing coordinates for met interpolation
- **use\_indices** (bool, *optional*) – Experimental.
- **\*\*interp\_kwargs** (Any) – Additional keyword arguments to pass to MetdataArray.intersect\_met(). Examples include method, bounds\_error, and fill\_value. If an error such as

```
ValueError: One of the requested xi is out of bounds in dimension 2
```

occurs, try calling this function with bounds\_error=False. In addition, setting fill\_value=0.0 will replace NaN values with 0.0.

**Returns**

npt.NDArray[np.float64] – Interpolated values

**Examples**

```
>>> from datetime import datetime
>>> import pandas as pd
>>> import numpy as np
>>> from pycontrails.datalib.ecmwf import ERA5
>>> from pycontrails import Flight
```

```
>>> # Get met data
>>> times = (datetime(2022, 3, 1, 0), datetime(2022, 3, 1, 3))
>>> variables = ["air_temperature", "specific_humidity"]
>>> levels = [300, 250, 200]
>>> era5 = ERA5(time=times, variables=variables, pressure_levels=levels)
>>> met = era5.open_metdataset()
```

```
>>> # Example flight
>>> df = pd.DataFrame()
>>> df['longitude'] = np.linspace(0, 50, 10)
>>> df['latitude'] = np.linspace(0, 10, 10)
>>> df['altitude'] = 11000
>>> df['time'] = pd.date_range("2022-03-01T00", "2022-03-01T02", periods=10)
>>> fl = Flight(df)
```

```
>>> # Intersect
>>> fl.intersect_met(met['air_temperature'], method='nearest')
array([231.62969892, 230.72604651, 232.24318771, 231.88338483,
       231.06429438, 231.59073409, 231.65125393, 231.93064004,
       232.03344087, 231.65954432])
```

```
>>> fl.intersect_met(met['air_temperature'], method='linear')
array([225.77794552, 225.13908414, 226.231218 , 226.31831528,
       225.56102321, 225.81192149, 226.03192642, 226.22056121,
       226.03770174, 225.63226188])
```

```
>>> # Interpolate and attach to `Flight` instance
>>> for key in met:
...     fl[key] = fl.intersect_met(met[key])
```

```
>>> # Show the final three columns of the dataframe
>>> fl.dataframe.iloc[:, -3:].head()
      time  air_temperature  specific_humidity
0 2022-03-01 00:00:00      225.777946      0.000132
1 2022-03-01 00:13:20      225.139084      0.000132
2 2022-03-01 00:26:40      226.231218      0.000107
3 2022-03-01 00:40:00      226.318315      0.000171
4 2022-03-01 00:53:20      225.561022      0.000109
```

### property level

Get pressure level values for points.

Automatically calculates pressure level using `units.m_to_pl()` using altitude key.

Note that if `level` key exists in data, the data at the `level` key will be returned. This allows an override of the default calculation of pressure level from altitude.

#### Returns

`npt.NDArray[np.float64]` – Point pressure level values, [*hPa*]

**required\_keys** = ('longitude', 'latitude', 'time')

Required keys for creating `GeoVectorDataset`

**to\_geojson\_points()**

Return dataset as GeoJSON FeatureCollection of Points.

Each Feature has a properties attribute that includes time and other data besides latitude, longitude, and altitude in data.

**Returns**

dict[str, Any] – Python representation of GeoJSON FeatureCollection

**to\_lon\_lat\_grid**(agg, \*, spatial\_bbox=(-180.0, -90.0, 180.0, 90.0), spatial\_grid\_res=0.5)

Convert vectors to a longitude-latitude grid.

**See also:**

[vector\\_to\\_lon\\_lat\\_grid](#)

**to\_pseudo\_mercator**(copy=True)

Convert data from attrs["crs"] to Pseudo Mercator (EPSG:3857).

**Parameters**

**copy** (bool, optional) – Copy data on transformation. Defaults to True.

**Returns**

GeoVectorDatasetType

**transform\_crs**(crs, copy=True)

Transform trajectory data from one coordinate reference system (CRS) to another.

**Parameters**

- **crs** (str) – Target CRS. Passed into `pyproj.Transformer`. The source CRS is inferred from the `attrs["crs"]` attribute.
- **copy** (bool, optional) – Copy data on transformation. Defaults to True.

**Returns**

GeoVectorDatasetType – Converted dataset with new coordinate reference system. `attrs["crs"]` reflects new crs.

**vertical\_keys = ('altitude', 'level', 'altitude\_ft')**

At least one of these vertical-coordinate keys must also be included

**class** pycontrails.core.vector.**VectorDataDict**(data=None)

Bases: dict[str, ndarray]

Thin wrapper around dict[str, np.ndarray] to ensure consistency.

**Parameters**

**data** (dict[str, np.ndarray], optional) – Dictionary input

**setdefault**(k, default=None)

Thin wrapper around dict.setdefault.

The main purpose of overriding is to run `_validate_array()` on set.

**Parameters**

- **k** (str) – Key
- **default** (npt.ArrayLike, optional) – Default value for key k

**Returns**

Any – Value at k

**update**(*other=None, \*\*kwargs*)

Update values without warning if overwriting.

This method casts values in *other* to `numpy.ndarray` and ensures that the array sizes are consistent with the instance.

#### Parameters

- **other** (`dict[str, npt.ArrayLike] | None, optional`) – Fields to update as dict
- **\*\*kwargs** (`npt.ArrayLike`) – Fields to update as kwargs

**class** `pycontrails.core.vector.VectorDataset`(*data=None, \*, attrs=None, copy=True, \*\*attrs\_kwargs*)

Bases: `object`

Base class to hold 1D arrays of consistent size.

#### Parameters

- **data** (`dict[str, npt.ArrayLike] | pd.DataFrame | VectorDataDict | VectorDataset | None, optional`) – Initial data, by default None
- **attrs** (`dict[str, Any] | AttrDict, optional`) – Dictionary of attributes, by default None
- **copy** (`bool, optional`) – Copy data on class creation, by default True
- **\*\*attrs\_kwargs** (`Any`) – Additional attributes passed as keyword arguments

#### Raises

**ValueError** – If “time” variable cannot be converted to numpy array.

#### attrs

Generic dataset attributes

**broadcast\_attrs**(*keys, overwrite=False, raise\_error=True*)

Attach values from *keys* in *attrs* onto *data*.

If possible, use `dtype = np.float32` when broadcasting. If not possible, use whatever `dtype` is inferred from the data by `numpy.full()`.

#### Parameters

- **keys** (`str | Iterable[str]`) – Keys to broadcast
- **overwrite** (`bool, optional`) – If True, overwrite existing values in *data*. By default False.
- **raise\_error** (`bool, optional`) – Raise `KeyError` if `self.attrs` does not contain some of *keys*.

#### Raises

**KeyError** – Not all keys found in *attrs*.

**broadcast\_numeric\_attrs**(*ignore\_keys=None, overwrite=False*)

Attach numeric values in *attrs* onto *data*.

Iterate through values in *attrs* and attach `float` and `int` values to *data*.

This method modifies object in place.

#### Parameters

- **ignore\_keys** (`str | Iterable[str], optional`) – Do not broadcast selected keys. Defaults to None.
- **overwrite** (`bool, optional`) – If True, overwrite existing values in *data*. By default False.

**copy**(\*\*kwargs)

Return a copy of this VectorDatasetType class.

**Parameters**

**\*\*kwargs** (Any) – Additional keyword arguments passed into the constructor of the returned class.

**Returns**

*VectorDatasetType* – Copy of class

**classmethod create\_empty**(keys, attrs=None, \*\*attrs\_kwargs)

Create instance with variables defined by *keys* and size 0.

If instance requires additional variables to be defined, these keys will automatically be attached to returned instance.

**Parameters**

- **keys** (Iterable[str]) – Keys to include in empty VectorDataset instance.
- **attrs** (dict[str, Any] | None, *optional*) – Attributes to attach instance.
- **\*\*attrs\_kwargs** (Any) – Define attributes as keyword arguments.

**Returns**

*VectorDatasetType* – Empty VectorDataset instance.

**data**

Vector data with labels as keys and `numpy.ndarray` as values

**property dataframe**

Shorthand property to access `to_dataframe()` with `copy=False`.

**Returns**

`pandas.DataFrame` – Equivalent to the output from `to_dataframe()`

**ensure\_vars**(vars, raise\_error=True)

Ensure variables exist in column of *data* or *attrs*.

**Parameters**

- **vars** (str | Iterable[str]) – A single string variable name or a sequence of string variable names.
- **raise\_error** (bool, *optional*) – Raise `KeyError` if data does not contain variables. Defaults to True.

**Returns**

bool – True if all variables exist. False otherwise.

**Raises**

**KeyError** – Raises when dataset does not contain variable in vars

**filter**(mask, copy=True, \*\*kwargs)

Filter *data* according to a boolean array mask.

Entries corresponding to `mask == True` are kept.

**Parameters**

- **mask** (npt.NDArray[np.bool\_]) – Boolean array with compatible shape.
- **copy** (bool, *optional*) – Copy data on filter. Defaults to True. See [numpy best practices](#) for insight into whether copy is appropriate.



- **\*\*kwargs** (Any) – Additional keyword arguments passed into the constructor of the returned class.

**Returns**

*VectorDatasetType* – Containing filtered data

**Raises**

**TypeError** – If mask is not a boolean array.

**classmethod** `from_dict(obj, copy=True, **obj_kwargs)`

Create instance from dict representation containing data and attrs.

**Parameters**

- **obj** (dict[str, Any]) – Dict representation of VectorDataset (e.g. `to_dict()`)
- **copy** (bool, optional) – Passed to *VectorDataset* constructor. Defaults to True.
- **\*\*obj\_kwargs** (Any) – Additional properties passed as keyword arguments.

**Returns**

*VectorDatasetType* – VectorDataset instance.

**See also:**

`to_dict()`

**generate\_splits**(*n\_splits*, *copy=True*)

Split instance into `n_split` sub-vectors.

**Parameters**

- **n\_splits** (int) – Number of splits.
- **copy** (bool, optional) – Passed into `filter()`. Defaults to True. Recommend to keep as True based on [numpy best practices](#).

**Returns**

Generator[*VectorDatasetType*, None, None] – Generator of split vectors.

**See also:**

`numpy.array_split()`

**get**(*key*, *default\_value=None*)

Get values from *data* with `default_value` if *key* not in *data*.

**Parameters**

- **key** (str) – Key to get from *data*
- **default\_value** (Any, optional) – Return `default_value` if *key* not in *data*, by default None

**Returns**

Any – Values at `data[key]` or `default_value`

**get\_data\_or\_attr**(*key*, *default=<object object>*)

Get value from *data* or *attrs*.

This method first checks if *key* is in *data* and returns the value if so. If *key* is not in *data*, then this method checks if *key* is in *attrs* and returns the value if so. If *key* is not in *data* or *attrs*, then the default value is returned if provided. Otherwise a **KeyError** is raised.

**Parameters**

- **key** (*str*) – Key to get from *data* or *attrs*
- **default** (*Any, optional*) – Default value to return if key is not in *data* or *attrs*.

**Returns**

Any – Value at `data[key]` or `attrs[key]`

**Raises**

**KeyError** – If key is not in *data* or *attrs* and `default` is not provided.

**Examples**

```
>>> vector = VectorDataset({"a": [1, 2, 3]}, attrs={"b": 4})
>>> vector.get_data_or_attr("a")
array([1, 2, 3])
```

```
>>> vector.get_data_or_attr("b")
4
```

```
>>> vector.get_data_or_attr("c")
Traceback (most recent call last):
...
KeyError: "Key 'c' not found in data or attrs."
```

```
>>> vector.get_data_or_attr("c", default=5)
5
```

**property hash**

Generate a unique hash for this class instance.

**Returns**

*str* – Unique hash for flight instance (sha1)

**select** (*keys, copy=True*)

Return new class instance only containing specified keys.

**Parameters**

- **keys** (*Iterable[str]*) – An iterable of keys to filter by.
- **copy** (*bool, optional*) – Copy data on selection. Defaults to True.

**Returns**

*VectorDataset* – *VectorDataset* containing only data associated to keys. Note that this method always returns a *VectorDataset*, even if the calling class is a proper subclass of *VectorDataset*.

**setdefault** (*key, default=None*)

Shortcut to *VectorDataDict.setdefault()*.

**Parameters**

- **key** (*str*) – Key in *data* dict.
- **default** (*npt.ArrayLike, optional*) – Values to use as default, if key is not defined

**Returns**

*numpy.ndarray* – Values at key

**property shape**

Shape of each array in *data*.

**Returns**

tuple[int] – Shape of each array in *data*.

**property size**

Length of each array in *data*.

**Returns**

int – Length of each array in *data*.

**sort(*by*)**

Sort data by key(s).

This method always creates a copy of the data by calling `pandas.DataFrame.sort_values()`.

**Parameters**

**by** (str | list[str]) – Key or list of keys to sort by.

**Returns**

*VectorDatasetType* – Instance with sorted data.

**classmethod sum(*vectors*, *infer\_attrs=True*, *fill\_value=None*)**

Sum a list of *VectorDataset* instances.

**Parameters**

- **vectors** (Sequence[*VectorDataset*]) – List of *VectorDataset* instances to concatenate.
- **infer\_attrs** (bool, optional) – If True, infer attributes from the first element in the sequence.
- **fill\_value** (float, optional) – Fill value to use when concatenating arrays. By default None, which raises an error if incompatible keys are found.

**Returns**

*VectorDataset* – Sum of all instances in *vectors*.

**Raises**

**KeyError** – If incompatible *data* keys are found among *vectors*.

**Examples**

```
>>> from pycontrails import VectorDataset
>>> v1 = VectorDataset({"a": [1, 2, 3], "b": [4, 5, 6]})
>>> v2 = VectorDataset({"a": [7, 8, 9], "b": [10, 11, 12]})
>>> v3 = VectorDataset({"a": [13, 14, 15], "b": [16, 17, 18]})
>>> v = VectorDataset.sum([v1, v2, v3])
>>> v.dataframe
   a  b
0  1  4
1  2  5
2  3  6
3  7 10
4  8 11
5  9 12
```

(continues on next page)

(continued from previous page)

```
6 13 16
7 14 17
8 15 18
```

**to\_dataframe(*copy=True*)**

Create `pd.DataFrame` in which each key-value pair in *data* is a column.

`DataFrame` does **not** copy data by default. Use the `copy` parameter to copy data values on creation.

**Parameters**

**copy** (*bool*, *optional*) – Copy data on `DataFrame` creation.

**Returns**

`pandas.DataFrame` – `DataFrame` holding key-values as columns.

**to\_dict()**

Create dictionary with *data* and *attrs*.

If geo-spatial coordinates (e.g. "latitude", "longitude", "altitude") are present, round to a reasonable precision. If a "time" variable is present, round to unix seconds. When the instance is a `GeoVectorDataset`, disregard any "altitude" or "level" coordinate and only include "altitude\_ft" in the output.

**Returns**

`dict[str, Any]` – Dictionary with *data* and *attrs*.

**See also:**

`from_dict()`

**Examples**

```
>>> import pprint
>>> from pycontrails import Flight
>>> fl = Flight(
...     longitude=[-100, -110],
...     latitude=[40, 50],
...     level=[200, 200],
...     time=[np.datetime64("2020-01-01T09"), np.datetime64("2020-01-01T09:30
↵")],
...     aircraft_type="B737",
... )
>>> fl = fl.resample_and_fill("5min")
>>> pprint.pprint(fl.to_dict())
{'aircraft_type': 'B737',
 'altitude_ft': [38661.0, 38661.0, 38661.0, 38661.0, 38661.0, 38661.0, 38661.0],
 'crs': 'EPSG:4326',
 'latitude': [40.0, 41.724, 43.428, 45.111, 46.769, 48.399, 50.0],
 'longitude': [-100.0,
               -101.441,
               -102.959,
               -104.563,
               -106.267,
               -108.076,
```

(continues on next page)

(continued from previous page)

```

        -110.0],
    'time': [1577869200,
            1577869500,
            1577869800,
            1577870100,
            1577870400,
            1577870700,
            1577871000]}

```

**update**(*other=None*, *\*\*kwargs*)

Update values in *data* dict without warning if overwriting.

#### Parameters

- **other** (dict[str, npt.ArrayLike] | None, *optional*) – Fields to update as dict
- **\*\*kwargs** (npt.ArrayLike) – Fields to update as kwargs

**class** pycontrails.core.vector.VectorDatasetType

Vector types

alias of TypeVar('VectorDatasetType', bound=VectorDataset)

pycontrails.core.vector.vector\_to\_lon\_lat\_grid(*vector*, *agg*, \*, *spatial\_bbox=(-180.0, -90.0, 180.0, 90.0)*, *spatial\_grid\_res=0.5*)

Convert vectors to a longitude-latitude grid.

#### Parameters

- **vector** (*GeoVectorDataset*) – Contains the longitude, latitude and variables for aggregation.
- **agg** (dict[str, str]) – Variable name and the function selected for aggregation, i.e. {"segment\_length": "sum"}.
- **spatial\_bbox** (tuple[float, float, float, float]) – Spatial bounding box, (lon\_min, lat\_min, lon\_max, lat\_max), [deg]. By default, the entire globe is used.
- **spatial\_grid\_res** (float) – Spatial grid resolution, [deg]

#### Returns

xarray.Dataset – Aggregated variables in a longitude-latitude grid.

### Examples

```

>>> rng = np.random.default_rng(234)
>>> vector = GeoVectorDataset(
...     longitude=rng.uniform(-10, 10, 10000),
...     latitude=rng.uniform(-10, 10, 10000),
...     altitude=np.zeros(10000),
...     time=np.zeros(10000).astype("datetime64[ns]"),
... )
>>> vector["foo"] = rng.uniform(0, 1, 10000)
>>> ds = vector.to_lon_lat_grid({"foo": "sum"}, spatial_bbox=(-10, -10, 9.5, 9.5))
>>> da = ds["foo"]
>>> da.coords

```

(continues on next page)

(continued from previous page)

```
Coordinates:
* longitude  (longitude) float64 320B -10.0 -9.5 -9.0 -8.5 ... 8.0 8.5 9.0 9.5
* latitude   (latitude) float64 320B -10.0 -9.5 -9.0 -8.5 ... 8.0 8.5 9.0 9.5
```

```
>>> da.values.round(2)
array([[2.23, 0.67, 1.29, ..., 4.66, 3.91, 1.93],
       [4.1 , 3.84, 1.34, ..., 3.24, 1.71, 4.55],
       [0.78, 3.25, 2.33, ..., 3.78, 2.93, 2.33],
       ...,
       [1.97, 3.02, 1.84, ..., 2.37, 3.87, 2.09],
       [3.74, 1.6 , 4.01, ..., 4.6 , 4.27, 3.4 ],
       [2.97, 0.12, 1.33, ..., 3.54, 0.74, 2.59]])
```

```
>>> da.sum().item() == vector["foo"].sum()
True
```

## 11.7 Utilities

|                              |                                      |
|------------------------------|--------------------------------------|
| <code>utils.types</code>     | Convenience types.                   |
| <code>utils.iteration</code> | Utilites for iterating of sequences. |
| <code>utils.temp</code>      | Temp utilities.                      |
| <code>utils.json</code>      | JSON utilities.                      |

### 11.7.1 pycontrails.utils.types

Convenience types.

#### Module Attributes

|                              |                                                                |
|------------------------------|----------------------------------------------------------------|
| <code>ArrayLike</code>       | Array like (np.ndarray, xr.DataArray)                          |
| <code>ArrayOrFloat</code>    | Array or Float (np.ndarray, float)                             |
| <code>ArrayScalarLike</code> | Array like input (np.ndarray, xr.DataArray, np.float64, float) |
| <code>DatetimeLike</code>    | Datetime like input (datetime, pd.Timestamp, np.datetime64)    |

## Functions

|                                                         |                                                                             |
|---------------------------------------------------------|-----------------------------------------------------------------------------|
| <code>apply_nan_mask_to_arraylike(arr, nan_mask)</code> | Apply <code>nan_mask</code> to <code>arr</code> while maintaining the type. |
| <code>support_arraylike(func)</code>                    | Extend a numpy universal function operating on arrays of floats.            |
| <code>type_guard(obj, type_[, error_message])</code>    | Shortcut utility to type guard a variable with custom error message.        |

### class pycontrails.utils.types.ArrayLike

Array like (np.ndarray, xr.DataArray)

alias of TypeVar('ArrayLike', ~numpy.ndarray, ~xarray.core.dataarray.DataArray, ~xarray.core.dataarray.DataArray | ~numpy.ndarray)

### class pycontrails.utils.types.ArrayOrFloat

Array or Float (np.ndarray, float)

alias of TypeVar('ArrayOrFloat', ~numpy.ndarray[~typing.Any, ~numpy.dtype[~numpy.float64]], float, float | ~numpy.ndarray[~typing.Any, ~numpy.dtype[~numpy.float64]])

### class pycontrails.utils.types.ArrayScalarLike

Array like input (np.ndarray, xr.DataArray, np.float64, float)

alias of TypeVar('ArrayScalarLike', ~numpy.ndarray, ~xarray.core.dataarray.DataArray, ~numpy.float64, float, ~numpy.ndarray | float, ~xarray.core.dataarray.DataArray | ~numpy.ndarray)

### class pycontrails.utils.types.DatetimeLike

Datetime like input (datetime, pd.Timestamp, np.datetime64)

alias of TypeVar('DatetimeLike', ~datetime.datetime, ~pandas.\_libs.tslibs.timestamps.Timestamp, ~numpy.datetime64, str)

`pycontrails.utils.types.apply_nan_mask_to_arraylike(arr, nan_mask)`

Apply `nan_mask` to `arr` while maintaining the type.

The parameter `arr` should have a `float` dtype.

This function is tested against `xr.DataArray`, `pd.Series`, and `np.ndarray` types.

#### Parameters

- `arr` (*ArrayLike*) – Array with `np.float64` entries
- `nan_mask` (`numpy.ndarray`) – Boolean array of the same shape as `arr`

#### Returns

*ArrayLike* – Array `arr` with values in `nan_mask` set to `np.nan`. The `arr` is mutated in place if it is a `np.ndarray`. For `xr.DataArray`, a copy is returned.

## Notes

When `arr` is a `xr.DataArray`, this function keeps any `attrs` from `arr` in the returned instance.

`pycontrails.utils.types.support_arraylike(func)`

Extend a numpy universal function operating on arrays of floats.

This decorator allows `func` to support any `ArrayScalarLike` parameter and keeps the return type consistent with the parameter.

### Parameters

**func** (`Callable[[ArrayScalarLike], np.ndarray]`) – A numpy *ufunc* taking in a single array with *float*-like dtype. This decorator assumes `func` returns a numpy array.

### Returns

`Callable[[ArrayScalarLike], ArrayScalarLike]` – Extended function.

See also:

-

`pycontrails.utils.types.type_guard(obj, type_, error_message=None)`

Shortcut utility to type guard a variable with custom error message.

### Parameters

- **obj** (`Any`) – Any variable object
- **type\_** (`Type[_Object]`) – Type of variable. Can be a tuple of types
- **error\_message** (`str, optional`) – Custom error message

### Returns

`_Object` – Returns the input object ensured to be `type_`

### Raises

**ValueError** – Raises `ValueError` if `obj` is not `type_`

## 11.7.2 pycontrails.utils.iteration

Utilites for iterating of sequences.

### Functions

---

`chunk_list(lst, n)`

Yield successive n-sized chunks from list.

---

`pycontrails.utils.iteration.chunk_list(lst, n)`

Yield successive n-sized chunks from list.



### 11.7.3 pycontrails.utils.temp

Temp utilities.

#### Functions

|                                             |                                                         |
|---------------------------------------------|---------------------------------------------------------|
| <code>remove_tempfile(temp_filename)</code> | Remove temp file.                                       |
| <code>temp_file()</code>                    | Get context manager for temp file creation and cleanup. |
| <code>temp_filename()</code>                | Get a filename in the host computers temp directory.    |

`pycontrails.utils.temp.remove_tempfile(temp_filename)`

Remove temp file.

#### Parameters

**temp\_filename** (*str*) – Temp filename

`pycontrails.utils.temp.temp_file()`

Get context manager for temp file creation and cleanup.

`pycontrails.utils.temp.temp_filename()`

Get a filename in the host computers temp directory.

More robust than using `tempfile.NamedTemporaryFile()`

#### Returns

*str* – Temp filename

#### See also:

[\*temp\\_file\*](#)

Context manager for temp file creation and cleanup

### 11.7.4 pycontrails.utils.json

JSON utilities.

#### Functions

|                                                     |                                                          |
|-----------------------------------------------------|----------------------------------------------------------|
| <code>dataframe_to_geojson_points(df[, ...])</code> | Convert a pandas DataFrame to a GeoJSON-like dictionary. |
|-----------------------------------------------------|----------------------------------------------------------|

## Classes

|                                                              |                                          |
|--------------------------------------------------------------|------------------------------------------|
| <code>NumpyEncoder</code> (*[, skipkeys, ensure_ascii, ...]) | Custom JSONEncoder for numpy data types. |
|--------------------------------------------------------------|------------------------------------------|

```
class pycontrails.utils.json.NumpyEncoder(*, skipkeys=False, ensure_ascii=True, check_circular=True,
allow_nan=True, sort_keys=False, indent=None,
separators=None, default=None)
```

Bases: JSONEncoder

Custom JSONEncoder for numpy data types.

## Examples

```
>>> import json
>>> import numpy as np
>>> from pycontrails.utils.json import NumpyEncoder
```

```
>>> data = np.array([0, 1, 2, 3])
>>> json.dumps(data, cls=NumpyEncoder)
'[0, 1, 2, 3]'
```

```
>>> data = np.datetime64(1234567890, "s")
>>> json.dumps(data, cls=NumpyEncoder)
'"2009-02-13T23:31:30"'
```

## Notes

Adapted <https://github.com/hmallen/numpyencoder/blob/master/numpyencoder/numpyencoder.py>

### `default(obj)`

Encode numpy data types.

This method overrides `default()` on the JSONEncoder class.

#### Parameters

**obj** (Any) – Object to encode.

#### Returns

Any – Encoded object.

```
pycontrails.utils.json.dataframe_to_geojson_points(df, properties=None, filter_nan=False)
```

Convert a pandas DataFrame to a GeoJSON-like dictionary.

This function create a Python representation of a GeoJSON FeatureCollection with Point features based on a `pandas.DataFrame` with geospatial coordinate columns.

#### Parameters

- **df** (`pandas.DataFrame`) – Base dataframe. Must contain geospatial coordinate columns ["longitude", "latitude", "altitude", "time"]
- **properties** (`list[str]`, *optional*) – Specify columns to include feature properties. By default, will use all column data that is not in the coordinate columns.

- **filter\_nan** (bool | list[str], *optional*) – Filter out points with nan values in any columns, including coordinate columns. If *list of str* is input, only *filter\_nan* columns will be used for filtering, allowing null values in the other columns.

**Returns**

dict[str, Any] – Description

**Raises****KeyError** – Raises if *properties* or *filter\_nan* input contains a column label that does not exist in *df*

## 11.8 Extensions

### 11.8.1 BADA

Requires [pycontrails-bada](#) extension and data files obtained through [BADA license](#). See [BADA Extension](#) for more information.

|                                                            |                                                                     |
|------------------------------------------------------------|---------------------------------------------------------------------|
| <code>ext.bada.bada_model</code>                           | BADA models along flight and on a regular grid.                     |
| <code>ext.bada.BADAFlight([met, params])</code>            | Compute aircraft properties and fuel consumption.                   |
| <code>ext.bada.BADAFlightParams([copy_source, ...])</code> | BADAFlight model parameters.                                        |
| <code>ext.bada.BADAGrid([met, params])</code>              | Compute nominal BADA values for a large grid of independent points. |
| <code>ext.bada.BADAGridParams([copy_source, ...])</code>   | BADAGrid model parameters.                                          |
| <code>ext.bada.BADA3([bada_path])</code>                   | BADA 3.15 Support.                                                  |
| <code>ext.bada.BADA4([bada_path])</code>                   | BADA 4.2 Support.                                                   |

#### pycontrails.ext.bada.bada\_model

BADA models along flight and on a regular grid.

#### Functions

|                                                                |                                                                           |
|----------------------------------------------------------------|---------------------------------------------------------------------------|
| <code>bada_nominal_grid(atyp_bada, bada, q_fuel[, ...])</code> | Calculate nominal BADA-derived fuel flow and engine efficiency over grid. |
| <code>get_bada(aircraft_type[, bada3_path, ...])</code>        | Check BADA databases for <code>aircraft_type</code> .                     |

#### Classes

|                                                   |                                                                     |
|---------------------------------------------------|---------------------------------------------------------------------|
| <code>BADAFlight([met, params])</code>            | Compute aircraft properties and fuel consumption.                   |
| <code>BADAFlightParams([copy_source, ...])</code> | BADAFlight model parameters.                                        |
| <code>BADAGrid([met, params])</code>              | Compute nominal BADA values for a large grid of independent points. |
| <code>BADAGridParams([copy_source, ...])</code>   | BADAGrid model parameters.                                          |
| <code>BADAParams([copy_source, ...])</code>       | Base parameters for BADA models.                                    |

## pycontrails.ext.bada.BADAFlight

**class** pycontrails.ext.bada.BADAFlight(*met=None, params=None, \*\*params\_kwargs*)

Bases: [AircraftPerformance](#)

Compute aircraft properties and fuel consumption.

### Parameters

- **met** (MetDataset | None, *optional*) – Dataset containing “air\_temperature”, “eastward\_wind”, and “northward\_wind” variables. Only used if these variables are not already found on parameter source in [eval\(\)](#). By default None.
- **params** (dict[str, Any], *optional*) – Override model parameters with dictionary. See [BADAFlightParams](#) for model parameters.
- **\*\*params\_kwargs** – Override model parameters with keyword arguments. See [BADAFlightParams](#) for model parameters.

See also:

- `meth:eval`
- `class:BADAFlightParams`

`__init__`(*met=None, params=None, \*\*params\_kwargs*)

### Methods

|                                                                           |                                                                                  |
|---------------------------------------------------------------------------|----------------------------------------------------------------------------------|
| <code>__init__</code> ([ <i>met, params</i> ])                            |                                                                                  |
| <code>calculate_aircraft_performance</code> (*, ...)                      | Calculate aircraft performance along a trajectory.                               |
| <code>downselect_met</code> ()                                            | Downselect <i>met</i> domain to the max/min bounds of <i>source</i> .            |
| <code>ensure_true_airspeed_on_source</code> ()                            | Add <i>true_airspeed</i> field to <i>source</i> data if not already present.     |
| <code>eval</code> ([ <i>source</i> ])                                     | Extract aircraft properties and calculate the fuel consumption.                  |
| <code>get_bada</code> ( <i>aircraft_type</i> )                            | Check BADA databases for <i>aircraft_type</i> .                                  |
| <code>get_source_param</code> ( <i>key</i> [, <i>default, set_attr</i> ]) | Get source data with default set by parameter key.                               |
| <code>require_met</code> ()                                               | Ensure that <i>met</i> is a MetDataset.                                          |
| <code>require_source_type</code> ( <i>type_</i> )                         | Ensure that <i>source</i> is <i>type_</i> .                                      |
| <code>set_source</code> ([ <i>source</i> ])                               | Attach original or copy of input <i>source</i> to <i>source</i> .                |
| <code>set_source_met</code> ([ <i>optional, variable</i> ])               | Ensure or interpolate each required <i>met_variables</i> on <i>source</i> .      |
| <code>simulate_fuel_and_performance</code> (*, ...)                       | Calculate aircraft mass, fuel mass flow rate, and overall propulsion efficiency. |
| <code>transfer_met_source_attrs</code> ([ <i>source</i> ])                | Transfer met source metadata from <i>met</i> to <i>source</i> .                  |
| <code>update_params</code> ([ <i>params</i> ])                            | Update model parameters on <i>params</i> .                                       |

## Attributes

|                                      |                                                                         |
|--------------------------------------|-------------------------------------------------------------------------|
| <code>params</code>                  | Instantiated model parameters, in dictionary form                       |
| <code>met</code>                     | Meteorology data                                                        |
| <code>source</code>                  | Data evaluated in model                                                 |
| <code>hash</code>                    | Generate a unique hash for model instance.                              |
| <code>interp_kwargs</code>           | Shortcut to create interpolation arguments from <code>params</code> .   |
| <code>long_name</code>               |                                                                         |
| <code>met_required</code>            | Require meteorology is not None on <code>__init__()</code>              |
| <code>met_variables</code>           | Required meteorology pressure level variables.                          |
| <code>name</code>                    |                                                                         |
| <code>optional_met_variables</code>  | Optional meteorology variables                                          |
| <code>processed_met_variables</code> | Set of required parameters if processing already complete on met input. |

**calculate\_aircraft\_performance**(\*, *aircraft\_type*, *altitude\_ft*, *air\_temperature*, *time*, *true\_airspeed*, *aircraft\_mass*, *engine\_efficiency*, *fuel\_flow*, *thrust*, *q\_fuel*, **\*\*kwargs**)

Calculate aircraft performance along a trajectory.

When `time` is not None, this method should be used for a single flight trajectory. Waypoints are coupled via the `time` parameter.

This method computes the rate of climb and descent (ROCD) to determine flight phases: “cruise”, “climb”, and “descent”. Performance metrics depend on this phase.

When `time` is None, this method can be used to simulate flight performance over an arbitrary sequence of flight waypoints by assuming nominal flight characteristics. In this case, each point is treated independently and all points are assumed to be in a “cruise” phase of the flight.

### Parameters

- **aircraft\_type** (`str`) – Used to query the underlying model database for aircraft engine parameters.
- **altitude\_ft** (`npt.NDArray[np.float64]`) – Altitude at each waypoint, [*ft*]
- **air\_temperature** (`npt.NDArray[np.float64]`) – Ambient temperature for each waypoint, [*K*]
- **time** (`npt.NDArray[np.datetime64]` | `None`) – Waypoint time in `np.datetime64` format. If `None`, only drag force will be used in thrust calculations (ie, no vertical change and constant horizontal change). In addition, aircraft is assumed to be in cruise.
- **true\_airspeed** (`npt.NDArray[np.float64]` | `float` | `None`) – True airspeed for each waypoint, [*ms<sup>-1</sup>*]. If `None`, a nominal value is used.
- **aircraft\_mass** (`npt.NDArray[np.float64]` | `float`) – Aircraft mass for each waypoint, [*kg*].
- **engine\_efficiency** (`npt.NDArray[np.float64]` | `float` | `None`) – Override the engine efficiency at each waypoint.
- **fuel\_flow** (`npt.NDArray[np.float64]` | `float` | `None`) – Override the fuel flow at each waypoint, [*kgs<sup>-1</sup>*].

- **thrust** (`npt.NDArray[np.float64] | float | None`) – Override the thrust setting at each waypoint, [:math: N].
- **q\_fuel** (`float`) – Lower calorific value (LCV) of fuel, [ $J kg_{fuel}^{-1}$ ].
- **\*\*kwargs** (Any) – Additional keyword arguments to pass to the model.

**Returns**

`AircraftPerformanceData` – Derived performance metrics at each waypoint.

**default\_params**

alias of `BADAFlightParams`

**eval**(`source=None, **params`)

Extract aircraft properties and calculate the fuel consumption.

Input source must contain a valid `aircraft_type` in its `source.attrs["aircraft_type"]`.

If met data is not passed into instance constructor, parameter `source` must contain the following data variables. - `true_airspeed` - `air_temperature`

If the following variables are not provided in the flight attribute, the default aircraft-engine assignment and aircraft mass properties from BADA will be assumed: - `engine_uid` - `max_takeoff_weight` - `operating_empty_weight` - `max_payload`

If 'load\_factor' (ranging between 0 and 1) is not provided in the flight attribute, the aircraft mass at the first waypoint will be set to the reference mass for the specific aircraft type from the BADA database.

**This method extracts the following aircraft properties from the BADA database.**

- `aircraft_type_bada`
- `wingspan`
- `max_mach`
- `max_altitude`
- `engine_name`
- `n_engine`

**From these BADA derived quantities, each of the following is computed.**

- `fuel_flow`: fuel mass flow rate, [ $kg s^{-1}$ ]
- `fuel_burn`: total fuel burn between two waypoints, [ $kg$ ]
- `aircraft_mass`
- `engine_efficiency`
- `thrust`

**Parameters**

- **source** (`Flight`) – Flight to evaluate
- **\*\*params** (Any) – Overwrite model parameters before eval

**Returns**

`Flight` – Flight with additional properties and fuel consumption variables listed above.

`get_bada(aircraft_type)`

Check BADA databases for `aircraft_type`.

**Parameters**

`aircraft_type` (`str`) – Aircraft type to check for.

**Returns**

BADA – BADA database object.

`long_name = 'Base of aircraft data flight model'`

`met`

Meteorology data

```
met_variables = (MetVariable(short_name='t', standard_name='air_temperature',
long_name='Air Temperature', level_type='isobaricInhPa', ecmwf_id=130, grib1_id=11,
grib2_id=(0, 0, 0), units='K', amip='ta', description='Air temperature is the bulk
temperature of the air, not the surface (skin) temperature.'),)
```

Required meteorology pressure level variables. Each element in the list is a `MetVariable` or a `tuple[MetVariable]`. If element is a `tuple[MetVariable]`, the variable depends on the data source. Only one variable in the tuple is required.

`name = 'bada'`

```
optional_met_variables = (MetVariable(short_name='u', standard_name='eastward_wind',
long_name='Eastward Wind', level_type='isobaricInhPa', ecmwf_id=131, grib1_id=33,
grib2_id=(0, 2, 2), units='m s**-1', amip='ua', description='"Eastward" indicates a
vector component which is positive when directed eastward (negative westward). Wind
is defined as a two-dimensional (horizontal) air velocity vector, with no vertical
component.'), MetVariable(short_name='v', standard_name='northward_wind',
long_name='Northward Wind', level_type='isobaricInhPa', ecmwf_id=132, grib1_id=34,
grib2_id=(0, 2, 3), units='m s**-1', amip='va', description='"Northward" indicates a
vector component which is positive when directed northward (negative southward).
Wind is defined as a two-dimensional (horizontal) air velocity vector, with no
vertical component.'))
```

Optional meteorology variables

`params`

Instantiated model parameters, in dictionary form

`source`

Data evaluated in model

## pycontrails.ext.bada.BADAFlightParams

```
class pycontrails.ext.bada.BADAFlightParams(copy_source=True, interpolation_method='linear',
interpolation_bounds_error=False,
interpolation_fill_value=nan,
interpolation_localize=False,
interpolation_use_indices=False,
interpolation_q_method=None, verify_met=True,
downselect_met=True, met_longitude_buffer=(0.0, 0.0),
met_latitude_buffer=(0.0, 0.0), met_level_buffer=(0.0,
0.0), met_time_buffer=(numpy.timedelta64(0, 'h'),
numpy.timedelta64(0, 'h')), correct_fuel_flow=True,
n_iter=3, bada3_path=None, bada4_path=None,
bada_priority=4, model_choice='total_energy_model')
```

Bases: BADAParams

*BADAFlight* model parameters.

```
__init__(copy_source=True, interpolation_method='linear', interpolation_bounds_error=False,
         interpolation_fill_value=nan, interpolation_localize=False, interpolation_use_indices=False,
         interpolation_q_method=None, verify_met=True, downselect_met=True,
         met_longitude_buffer=(0.0, 0.0), met_latitude_buffer=(0.0, 0.0), met_level_buffer=(0.0, 0.0),
         met_time_buffer=(numpy.timedelta64(0, 'h'), numpy.timedelta64(0, 'h')), correct_fuel_flow=True,
         n_iter=3, bada3_path=None, bada4_path=None, bada_priority=4,
         model_choice='total_energy_model')
```

## Methods

|                                           |                               |
|-------------------------------------------|-------------------------------|
| <code>__init__([copy_source, ...])</code> |                               |
| <code>as_dict()</code>                    | Convert object to dictionary. |



## Attributes

|                                         |                                                                                                                              |
|-----------------------------------------|------------------------------------------------------------------------------------------------------------------------------|
| <code>bada3_path</code>                 | Default paths to BADA3 and BADA4 data directories<br>Setting path to None will use default path on BADA3 and BADA4 instances |
| <code>bada4_path</code>                 |                                                                                                                              |
| <code>bada_priority</code>              | Default BADA database used to search for aircraft characteristics.                                                           |
| <code>copy_source</code>                | Copy input source data on eval                                                                                               |
| <code>correct_fuel_flow</code>          | Whether to correct fuel flow to ensure it remains within the operational limits of the aircraft type.                        |
| <code>downselect_met</code>             | Downselect input <code>MetDataset`</code> to region around source.                                                           |
| <code>interpolation_bounds_error</code> | If True, points lying outside interpolation will raise an error                                                              |
| <code>interpolation_fill_value</code>   | Used for outside interpolation value if <code>interpolation_bounds_error</code> is False                                     |
| <code>interpolation_localize</code>     | Experimental.                                                                                                                |
| <code>interpolation_method</code>       | Interpolation method.                                                                                                        |
| <code>interpolation_q_method</code>     | Experimental.                                                                                                                |
| <code>interpolation_use_indices</code>  | Experimental.                                                                                                                |
| <code>met_latitude_buffer</code>        | Met latitude buffer for input to <code>Flight.downselect_met()</code> , in WGS84 coordinates.                                |
| <code>met_level_buffer</code>           | Met level buffer for input to <code>Flight.downselect_met()</code> , in <code>[hPa]</code> .                                 |
| <code>met_longitude_buffer</code>       | Met longitude buffer for input to <code>Flight.downselect_met()</code> , in WGS84 coordinates.                               |
| <code>met_time_buffer</code>            | Met time buffer for input to <code>Flight.downselect_met()</code> Only applies when <code>downselect_met</code> is True.     |
| <code>model_choice</code>               | BADA3 and BADA4 fuel flow model choice                                                                                       |
| <code>n_iter</code>                     | The number of iterations used to calculate aircraft mass and fuel flow.                                                      |
| <code>verify_met</code>                 | Call <code>_verify_met()</code> on model instantiation.                                                                      |

## pycontrails.ext.bada.BADAGrid

**class** `pycontrails.ext.bada.BADAGrid`(*met=None, params=None, \*\*params\_kwargs*)

Bases: [AircraftPerformanceGrid](#)

Compute nominal BADA values for a large grid of independent points.

This model automatically corrects engine efficiency values to ensure that they remain realistic by clipping to a nominal grid of BADA-derived values.

### Parameters

- **met** (`MetDataset | None, optional`) – Dataset containing “air\_temperature” variable. Only used if these variables are not already found on parameter source in `eval()`. By default None.
- **params** (`dict[str, Any], optional`) – Override model parameters with dictionary. See [BADAGridParams](#) for model parameters.

- **\*\*params\_kwargs** – Override model parameters with keyword arguments. See [BADAFlightParams](#) for model parameters.

See also:

```
-
  meth:eval
-
  class:BADAGridParams

__init__(met=None, params=None, **params_kwargs)
```

## Methods

|                                                         |                                                                             |
|---------------------------------------------------------|-----------------------------------------------------------------------------|
| <code>__init__([met, params])</code>                    |                                                                             |
| <code>downselect_met()</code>                           | Downselect <i>met</i> domain to the max/min bounds of <i>source</i> .       |
| <code>eval([source])</code>                             | Extract aircraft properties and calculate the fuel consumption.             |
| <code>get_source_param(key[, default, set_attr])</code> | Get source data with default set by parameter key.                          |
| <code>require_met()</code>                              | Ensure that <i>met</i> is a MetDataset.                                     |
| <code>require_source_type(type_)</code>                 | Ensure that <i>source</i> is type_.                                         |
| <code>set_source([source])</code>                       | Attach original or copy of input source to <i>source</i> .                  |
| <code>set_source_met([optional, variable])</code>       | Ensure or interpolate each required <i>met_variables</i> on <i>source</i> . |
| <code>transfer_met_source_attrs([source])</code>        | Transfer met source metadata from <i>met</i> to source.                     |
| <code>update_params([params])</code>                    | Update model parameters on <i>params</i> .                                  |

## Attributes

|                                |                                                                         |
|--------------------------------|-------------------------------------------------------------------------|
| <i>params</i>                  | Instantiated model parameters, in dictionary form                       |
| <i>met</i>                     | Meteorology data                                                        |
| <i>source</i>                  | Evaluated data source                                                   |
| <i>hash</i>                    | Generate a unique hash for model instance.                              |
| <i>interp_kwargs</i>           | Shortcut to create interpolation arguments from <i>params</i> .         |
| <i>long_name</i>               |                                                                         |
| <i>met_required</i>            | Require meteorology is not None on <code>__init__()</code>              |
| <i>met_variables</i>           | Required meteorology pressure level variables.                          |
| <i>name</i>                    |                                                                         |
| <i>optional_met_variables</i>  | Optional meteorology variables                                          |
| <i>processed_met_variables</i> | Set of required parameters if processing already complete on met input. |

### default\_params

alias of [BADAGridParams](#)

**eval**(*source=None, \*\*params*)

Extract aircraft properties and calculate the fuel consumption.

#### Parameters

- **source** (*GeoVectorDataset* | *None, optional*) – Vector dataset defining coordinates to evaluate model. If *None*, the coordinates of *met* are used as evaluation points.
- **\*\*params** (*Any*) – Overwrite model parameters before eval

#### Returns

*GeoVectorDataset* –

Data with variables:

- "engine\_efficiency"
- "true\_airspeed"
- "fuel\_flow"
- "thrust"
- "aircraft\_mass"

and attributes:

- "aircraft\_type"
- "bada\_model"
- "aircraft\_type\_bada"
- "wingspan"
- "max\_mach"
- "max\_altitude"
- "engine\_name"
- "n\_engine"

**long\_name = 'Base of aircraft data evaluated at arbitrary points'**

**met**

Meteorology data

```
met_variables = (MetVariable(short_name='t', standard_name='air_temperature',
long_name='Air Temperature', level_type='isobaricInhPa', ecmwf_id=130, grib1_id=11,
grib2_id=(0, 0, 0), units='K', amip='ta', description='Air temperature is the bulk
temperature of the air, not the surface (skin) temperature.'),)
```

Required meteorology pressure level variables. Each element in the list is a `MetVariable` or a `tuple[MetVariable]`. If element is a `tuple[MetVariable]`, the variable depends on the data source. Only one variable in the tuple is required.

**name = 'bada-points'**

```
optional_met_variables = (MetVariable(short_name='u', standard_name='eastward_wind',
long_name='Eastward Wind', level_type='isobaricInhPa', ecmwf_id=131, grib1_id=33,
grib2_id=(0, 2, 2), units='m s**-1', amip='ua', description='"Eastward" indicates a
vector component which is positive when directed eastward (negative westward). Wind
is defined as a two-dimensional (horizontal) air velocity vector, with no vertical
component.'), MetVariable(short_name='v', standard_name='northward_wind',
long_name='Northward Wind', level_type='isobaricInhPa', ecmwf_id=132, grib1_id=34,
grib2_id=(0, 2, 3), units='m s**-1', amip='va', description='"Northward" indicates a
vector component which is positive when directed northward (negative southward).
Wind is defined as a two-dimensional (horizontal) air velocity vector, with no
vertical component.'))
```

Optional meteorology variables

#### params

Instantiated model parameters, in dictionary form

#### source

Evaluated data source

### pycontrails.ext.bada.BADAGridParams

```
class pycontrails.ext.bada.BADAGridParams(copy_source=True, interpolation_method='linear',
interpolation_bounds_error=False,
interpolation_fill_value=nan, interpolation_localize=False,
interpolation_use_indices=False,
interpolation_q_method=None, verify_met=True,
downselect_met=True, met_longitude_buffer=(0.0, 0.0),
met_latitude_buffer=(0.0, 0.0), met_level_buffer=(0.0, 0.0),
met_time_buffer=(numpy.timedelta64(0, 'h'),
numpy.timedelta64(0, 'h')), fuel=<factory>,
aircraft_type='B737', mach_number=None,
aircraft_mass=None, correct_fuel_flow=True, n_iter=3,
bada3_path=None, bada4_path=None, bada_priority=4,
model_choice='total_energy_model', engine_uid=None)
```

Bases: [BADAParams](#), [AircraftPerformanceGridParams](#)

[BADAGrid](#) model parameters.

#### See also:

[BADAParams](#)

```
__init__(copy_source=True, interpolation_method='linear', interpolation_bounds_error=False,
interpolation_fill_value=nan, interpolation_localize=False, interpolation_use_indices=False,
interpolation_q_method=None, verify_met=True, downselect_met=True,
met_longitude_buffer=(0.0, 0.0), met_latitude_buffer=(0.0, 0.0), met_level_buffer=(0.0, 0.0),
met_time_buffer=(numpy.timedelta64(0, 'h'), numpy.timedelta64(0, 'h')), fuel=<factory>,
aircraft_type='B737', mach_number=None, aircraft_mass=None, correct_fuel_flow=True,
n_iter=3, bada3_path=None, bada4_path=None, bada_priority=4,
model_choice='total_energy_model', engine_uid=None)
```

## Methods

|                                           |                               |
|-------------------------------------------|-------------------------------|
| <code>__init__([copy_source, ...])</code> |                               |
| <code>as_dict()</code>                    | Convert object to dictionary. |

## Attributes

|                                         |                                                                                                                                       |
|-----------------------------------------|---------------------------------------------------------------------------------------------------------------------------------------|
| <code>aircraft_mass</code>              | Aircraft mass, [ <i>kg</i> ] If None, a nominal value is determined by the implementation.                                            |
| <code>aircraft_type</code>              | ICAO code designating simulated aircraft type.                                                                                        |
| <code>bada3_path</code>                 | Default paths to BADA3 and BADA4 data directories<br>Setting path to None will use default path on BADA3 and BADA4 instances          |
| <code>bada4_path</code>                 |                                                                                                                                       |
| <code>bada_priority</code>              | Default BADA database used to search for aircraft characteristics.                                                                    |
| <code>copy_source</code>                | Copy input source data on eval                                                                                                        |
| <code>correct_fuel_flow</code>          | Whether to correct fuel flow to ensure it remains within the operational limits of the aircraft type.                                 |
| <code>downselect_met</code>             | Downselect input <code>MetDataset`</code> to region around source.                                                                    |
| <code>engine_uid</code>                 | Engine unique identification number for the ICAO Aircraft Emissions Databank (EDB) If None, the assumed engine_uid from BADA is used. |
| <code>interpolation_bounds_error</code> | If True, points lying outside interpolation will raise an error                                                                       |
| <code>interpolation_fill_value</code>   | Used for outside interpolation value if <code>interpolation_bounds_error</code> is False                                              |
| <code>interpolation_localize</code>     | Experimental.                                                                                                                         |
| <code>interpolation_method</code>       | Interpolation method.                                                                                                                 |
| <code>interpolation_q_method</code>     | Experimental.                                                                                                                         |
| <code>interpolation_use_indices</code>  | Experimental.                                                                                                                         |
| <code>mach_number</code>                | Mach number, [ <i>Ma</i> ] If None, a nominal cruise value is determined by the implementation.                                       |
| <code>met_latitude_buffer</code>        | Met latitude buffer for input to <code>Flight.downselect_met()</code> , in WGS84 coordinates.                                         |
| <code>met_level_buffer</code>           | Met level buffer for input to <code>Flight.downselect_met()</code> , in [ <i>hPa</i> ].                                               |
| <code>met_longitude_buffer</code>       | Met longitude buffer for input to <code>Flight.downselect_met()</code> , in WGS84 coordinates.                                        |
| <code>met_time_buffer</code>            | Met time buffer for input to <code>Flight.downselect_met()</code> Only applies when <code>downselect_met</code> is True.              |
| <code>model_choice</code>               | BADA3 and BADA4 fuel flow model choice                                                                                                |
| <code>n_iter</code>                     | The number of iterations used to calculate aircraft mass and fuel flow.                                                               |
| <code>verify_met</code>                 | Call <code>_verify_met()</code> on model instantiation.                                                                               |
| <code>fuel</code>                       | Fuel type                                                                                                                             |

**engine\_uid = None**

Engine unique identification number for the ICAO Aircraft Emissions Databank (EDB) If None, the assumed engine\_uid from BADA is used.

**pycontrails.ext.bada.BADA3**

**class** pycontrails.ext.bada.BADA3(*bada\_path=None*)

Bases: BADA

BADA 3.15 Support.

Base of Aircraft Data (BADA) provides a set of ASCII files containing performance and operating procedure coefficients for 294 different aircraft types. This class implements the “total energy model” as described in BADA User Manual.

**Parameters**

**bada\_path** (str | pathlib.Path, *optional*) – Path to BADA 3.15 Model files. Default path set to /bada/bada3 in the parent directory of the pycontrails repository.

**References**

- Eurocontrol. User Manual for the Base of Aircraft Data (BADA) Revision 3.15. Vol EEC Techni. Eurocontrol Experimental Centre; 2019.

**\_\_init\_\_**(*bada\_path=None*)

## Methods

|                                                               |                                                                                               |
|---------------------------------------------------------------|-----------------------------------------------------------------------------------------------|
| <code>__init__([bada_path])</code>                            |                                                                                               |
| <code>calculate_aircraft_performance(*, ...)</code>           | Calculate aircraft performance along a trajectory.                                            |
| <code>check_aircraft_type_availability(aircraft_type)</code>  | Check if aircraft type designator is available in BADA database.                              |
| <code>clip_fuel_flow_by_ptf_bounds(atyp_icao, ...)</code>     | Clip array of fuel flow by the BADA PTF-defined thresholds.                                   |
| <code>correct_fuel_flow(atyp_icao, fuel_flow, ...)</code>     | Correct unrealistic fuel mass flow rate by clipping to PTF nominals.                          |
| <code>downselect_met()</code>                                 | Downselect met domain to the max/min bounds of source.                                        |
| <code>ensure_true_airspeed_on_source()</code>                 | Add <code>true_airspeed</code> field to source data if not already present.                   |
| <code>eval([source])</code>                                   | Evaluate the aircraft performance model.                                                      |
| <code>get_aircraft_engine_properties(atyp_icao[, ...])</code> | Extract the aircraft performance and engine properties from the BADA database.                |
| <code>get_aircraft_params(aircraft_type)</code>               | Get aircraft params associated to aircraft type.                                              |
| <code>get_ptf_params(aircraft_type)</code>                    | Get PTF params associated to aircraft type.                                                   |
| <code>get_source_param(key[, default, set_attr])</code>       | Get source data with default set by parameter key.                                            |
| <code>is_within_thrust_limits(*, atyp_bada, ...)</code>       | Determine whether thrust required at each waypoint is within bounds of BADA model.            |
| <code>nominal_cruising_speed(aircraft_type, alt_ft)</code>    | Compute nominal cruising speed at altitude by interpolating over PTF data.                    |
| <code>nominal_fuel_flow(aircraft_type, alt_ft, phase)</code>  | Compute nominal fuel flow depending on <i>phase</i> based on PTF data.                        |
| <code>nominal_fuel_flow_from_flight_phase(...)</code>         | Call <code>nominal_fuel_flow()</code> for each phase according to <code>flight_phase</code> . |
| <code>nominal_roc(aircraft_type, alt_ft)</code>               | Compute nominal rate of climb at altitude by interpolating over PTF data.                     |
| <code>nominal_rod(aircraft_type, alt_ft)</code>               | Compute nominal rate of descent at altitude by interpolating over PTF data.                   |
| <code>require_met()</code>                                    | Ensure that <code>met</code> is a <code>MetDataset</code> .                                   |
| <code>require_source_type(type_)</code>                       | Ensure that <code>source</code> is <code>type_</code> .                                       |
| <code>set_source([source])</code>                             | Attach original or copy of input <code>source</code> to <code>source</code> .                 |
| <code>set_source_met([optional, variable])</code>             | Ensure or interpolate each required <code>met_variables</code> on <code>source</code> .       |
| <code>simulate_fuel_and_performance(*, ...)</code>            | Calculate aircraft mass, fuel mass flow rate, and overall propulsion efficiency.              |
| <code>transfer_met_source_attrs([source])</code>              | Transfer met source metadata from <code>met</code> to <code>source</code> .                   |
| <code>update_params([params])</code>                          | Update model parameters on <code>params</code> .                                              |

## Attributes

|                                        |                                                                         |
|----------------------------------------|-------------------------------------------------------------------------|
| <code>path</code>                      | Path to BADA data directory                                             |
| <code>synonym_dict</code>              | Aircraft type synonyms                                                  |
| <code>aircraft_engine_dataframe</code> | Available/assumed aircraft-engine combinations                          |
| <code>ptf_params_dict</code>           |                                                                         |
| <code>aircraft_param_dict</code>       | Engine and aircraft properties common to BADA3 and BADA4                |
| <code>default_path</code>              | Default path to BADA data directories                                   |
| <code>version</code>                   | BADA version.                                                           |
| <code>hash</code>                      | Generate a unique hash for model instance.                              |
| <code>interp_kwargs</code>             | Shortcut to create interpolation arguments from params.                 |
| <code>long_name</code>                 |                                                                         |
| <code>met</code>                       | Meteorology data                                                        |
| <code>met_required</code>              | Require meteorology is not None on <code>__init__()</code>              |
| <code>name</code>                      |                                                                         |
| <code>params</code>                    | Instantiated model parameters, in dictionary form                       |
| <code>source</code>                    | Data evaluated in model                                                 |
| <code>ptf_param_dict</code>            | Coefficients and properties extracted from BADA3 and BADA4 PTF files    |
| <code>met_variables</code>             | Required meteorology pressure level variables.                          |
| <code>processed_met_variables</code>   | Set of required parameters if processing already complete on met input. |
| <code>optional_met_variables</code>    | Optional meteorology variables                                          |

### `aircraft_engine_dataframe`

Available/assumed aircraft-engine combinations

### `aircraft_param_dict`

Engine and aircraft properties common to BADA3 and BADA4

**`calculate_aircraft_performance`**(\* , *aircraft\_type*, *altitude\_ft*, *air\_temperature*, *time*, *true\_airspeed*, *aircraft\_mass*, *engine\_efficiency*, *fuel\_flow*, *thrust*, *q\_fuel*, **\*\*kwargs**)

Calculate aircraft performance along a trajectory.

When `time` is not None, this method should be used for a single flight trajectory. Waypoints are coupled via the `time` parameter.

This method computes the rate of climb and descent (ROCD) to determine flight phases: “cruise”, “climb”, and “descent”. Performance metrics depend on this phase.

When `time` is None, this method can be used to simulate flight performance over an arbitrary sequence of flight waypoints by assuming nominal flight characteristics. In this case, each point is treated independently and all points are assumed to be in a “cruise” phase of the flight.

#### Parameters

- **`aircraft_type`** (`str`) – Used to query the underlying model database for aircraft engine parameters.
- **`altitude_ft`** (`npt.NDArray[np.float64]`) – Altitude at each waypoint, [*ft*]



- **air\_temperature** (`npt.NDArray[np.float64]`) – Ambient temperature for each waypoint, [ $K$ ]
- **time** (`npt.NDArray[np.datetime64] | None`) – Waypoint time in `np.datetime64` format. If `None`, only drag force will be used in thrust calculations (ie, no vertical change and constant horizontal change). In addition, aircraft is assumed to be in cruise.
- **true\_airspeed** (`npt.NDArray[np.float64] | float | None`) – True airspeed for each waypoint, [ $ms^{-1}$ ]. If `None`, a nominal value is used.
- **aircraft\_mass** (`npt.NDArray[np.float64] | float`) – Aircraft mass for each waypoint, [ $kg$ ].
- **engine\_efficiency** (`npt.NDArray[np.float64] | float | None`) – Override the engine efficiency at each waypoint.
- **fuel\_flow** (`npt.NDArray[np.float64] | float | None`) – Override the fuel flow at each waypoint, [ $kg s^{-1}$ ].
- **thrust** (`npt.NDArray[np.float64] | float | None`) – Override the thrust setting at each waypoint, [ $N$ ].
- **q\_fuel** (`float`) – Lower calorific value (LCV) of fuel, [ $J kg_{fuel}^{-1}$ ].
- **\*\*kwargs** (Any) – Additional keyword arguments to pass to the model.

**Returns**

`AircraftPerformanceData` – Derived performance metrics at each waypoint.

**default\_path**

Default path to BADA data directories

**get\_aircraft\_engine\_properties**(*atyp\_icao, engine\_uid=None*)

Extract the aircraft performance and engine properties from the BADA database.

**Parameters**

- **atyp\_icao** (`str`) – ICAO aircraft type designator.
- **engine\_uid** (`str`) – Engine unique identification number from the ICAO EDB. If `None` is provided or `engine_uid` is unidentified, default aircraft-engine combination from BADA will be used. This parameter is unused for [BADA3](#); it is only considered for [BADA4](#).

**Returns**

`AircraftProperties`

**is\_within\_thrust\_limits**(\**, atyp\_bada, altitude\_ft, air\_temperature, time, true\_airspeed, aircraft\_mass, thrust, flight\_phase*)

Determine whether thrust required at each waypoint is within bounds of BADA model.

If thrust is not provided as input, it will be computed according to BADA standards. Thrust limits are only defined for the BADA3 model. For BADA4, this function will raise a `NotImplementedError`.

**Parameters**

- **atyp\_bada** (`str`) – ICAO aircraft type designator (BADA 3), or long aircraft type designator (BADA 4).
- **altitude\_ft** (`npt.NDArray[np.float_]`) – Altitude at each waypoint, [ $ft$ ]
- **air\_temperature** (`npt.NDArray[np.float_]`) – Ambient temperature for each waypoint, [ $K$ ]

- **time** (`npt.NDArray[np.datetime64] | None`) – Waypoint time in `np.datetime64` format. If `None`, only drag force will be used in thrust calculations (ie, no vertical change and constant horizontal change). In addition, aircraft is assumed to be in cruise.
- **true\_airspeed** (`npt.NDArray[np.float_] | float | None`) – True airspeed for each waypoint, [ $ms^{-1}$ ]. If `None`, the nominal BADA cruise value is used.
- **aircraft\_mass** (`npt.NDArray[np.float_] | float | None`) – Aircraft mass for each waypoint, [ $kg$ ]. If `None`, the nominal BADA value is used.
- **thrust** (`npt.NDArray[np.float_] | float | None`) – Override the thrust setting at each waypoint, [:math:  $N$ ].
- **flight\_phase** (`npt.NDArray[np.uint8] | flight.FlightPhase | None`) – Flight phase for each waypoint. If `None`, the flight phase is assumed to be cruise.

**Returns**

`npt.NDArray[np.bool_]` – Boolean array telling whether the thrust at each waypoint is within BADA trust limits

`long_name = 'Base of Aircraft Data (BADA) Revision 3.15'`

`name = 'BADA3'`

**path**

Path to BADA data directory

**ptf\_params\_dict****synonym\_dict**

Aircraft type synonyms

**version**

BADA version. Currently only used on BADA3 class.

**pycontrails.ext.bada.BADA4**

`class pycontrails.ext.bada.BADA4(bada_path=None)`

Bases: BADA

BADA 4.2 Support.

Base of Aircraft Data (BADA) provides a set of ASCII files containing performance and operating procedure coefficients.`

**Parameters**

**bada\_path** (`str | pathlib.Path, optional`) – Path to BADA 4.2 Model files Default path set to `/bada/bada4` in the parent directory of the pycontrails repository.

## References

- **Eurocontrol. User Manual for the Base of Aircraft Data (BADA) Family 4.**  
Vol EEC Techni. Eurocontrol Experimental Centre; 2016.

`__init__`(*bada\_path=None*)

## Methods

|                                                                |                                                                                               |
|----------------------------------------------------------------|-----------------------------------------------------------------------------------------------|
| <code>__init__</code> ([bada_path])                            |                                                                                               |
| <code>assumed_aircraft_engine_type_bada4</code> (...)          | Get the assumed aircraft type for BADA4.                                                      |
| <code>calculate_aircraft_performance</code> (*, ...)           | Calculate aircraft performance along a trajectory.                                            |
| <code>check_aircraft_type_availability</code> (aircraft_type)  | Check if aircraft type designator is available in BADA database.                              |
| <code>clip_fuel_flow_by_ptf_bounds</code> (atyp_icao, ...)     | Clip array of fuel flow by the BADA PTF-defined thresholds.                                   |
| <code>correct_fuel_flow</code> (atyp_icao, fuel_flow, ...)     | Correct unrealistic fuel mass flow rate by clipping to PTF nominals.                          |
| <code>downselect_met</code> ()                                 | Downselect met domain to the max/min bounds of source.                                        |
| <code>ensure_true_airspeed_on_source</code> ()                 | Add <code>true_airspeed</code> field to source data if not already present.                   |
| <code>eval</code> ([source])                                   | Evaluate the aircraft performance model.                                                      |
| <code>get_aircraft_engine_properties</code> (atyp_icao[, ...]) | Extract the aircraft performance and engine properties from the BADA database.                |
| <code>get_aircraft_params</code> (aircraft_type)               | Get aircraft params associated to aircraft type.                                              |
| <code>get_ptf_params</code> (aircraft_type)                    | Get PTF params associated to aircraft type.                                                   |
| <code>get_source_param</code> (key[, default, set_attr])       | Get source data with default set by parameter key.                                            |
| <code>is_within_thrust_limits</code> (*, atyp_bada, ...)       | Determine whether thrust required at each waypoint is within bounds of BADA model.            |
| <code>nominal_cruising_speed</code> (aircraft_type, alt_ft)    | Compute nominal cruising speed at altitude by interpolating over PTF data.                    |
| <code>nominal_fuel_flow</code> (aircraft_type, alt_ft, phase)  | Compute nominal fuel flow depending on <i>phase</i> based on PTF data.                        |
| <code>nominal_fuel_flow_from_flight_phase</code> (...)         | Call <code>nominal_fuel_flow()</code> for each phase according to <code>flight_phase</code> . |
| <code>nominal_roc</code> (aircraft_type, alt_ft)               | Compute nominal rate of climb at altitude by interpolating over PTF data.                     |
| <code>nominal_rod</code> (aircraft_type, alt_ft)               | Compute nominal rate of descent at altitude by interpolating over PTF data.                   |
| <code>require_met</code> ()                                    | Ensure that <code>met</code> is a <code>MetDataset</code> .                                   |
| <code>require_source_type</code> (type_)                       | Ensure that <code>source</code> is <code>type_</code> .                                       |
| <code>set_source</code> ([source])                             | Attach original or copy of input <code>source</code> to <code>source</code> .                 |
| <code>set_source_met</code> ([optional, variable])             | Ensure or interpolate each required <code>met_variables</code> on <code>source</code> .       |
| <code>simulate_fuel_and_performance</code> (*, ...)            | Calculate aircraft mass, fuel mass flow rate, and overall propulsion efficiency.              |
| <code>transfer_met_source_attrs</code> ([source])              | Transfer met source metadata from <code>met</code> to <code>source</code> .                   |
| <code>update_params</code> ([params])                          | Update model parameters on <code>params</code> .                                              |

## Attributes

|                                        |                                                                         |
|----------------------------------------|-------------------------------------------------------------------------|
| <code>path</code>                      | Path to BADA data directory                                             |
| <code>synonym_dict</code>              | Aircraft type synonyms                                                  |
| <code>aircraft_engine_dataframe</code> | Available/assumed aircraft-engine combinations                          |
| <code>ptf_params_dict</code>           |                                                                         |
| <code>aircraft_param_dict</code>       | Engine and aircraft properties common to BADA3 and BADA4                |
| <code>default_path</code>              | Default path to BADA data directories                                   |
| <code>version</code>                   | BADA version.                                                           |
| <code>hash</code>                      | Generate a unique hash for model instance.                              |
| <code>interp_kwargs</code>             | Shortcut to create interpolation arguments from params.                 |
| <code>long_name</code>                 |                                                                         |
| <code>met</code>                       | Meteorology data                                                        |
| <code>met_required</code>              | Require meteorology is not None on <code>__init__()</code>              |
| <code>name</code>                      |                                                                         |
| <code>params</code>                    | Instantiated model parameters, in dictionary form                       |
| <code>source</code>                    | Data evaluated in model                                                 |
| <code>aircraft_engine_options</code>   |                                                                         |
| <code>ptf_param_dict</code>            | Coefficients and properties extracted from BADA3 and BADA4 PTF files    |
| <code>met_variables</code>             | Required meteorology pressure level variables.                          |
| <code>processed_met_variables</code>   | Set of required parameters if processing already complete on met input. |
| <code>optional_met_variables</code>    | Optional meteorology variables                                          |

### `aircraft_engine_dataframe`

Available/assumed aircraft-engine combinations

### `aircraft_engine_options`

### `aircraft_param_dict`

Engine and aircraft properties common to BADA3 and BADA4

### `assumed_aircraft_engine_type_bada4(aircraft_type, engine_uid)`

Get the assumed aircraft type for BADA4.

#### Parameters

- `aircraft_type` (`str`) – ICAO aircraft type designator
- `engine_uid` (`None` | `str`) – Engine unique identification number from the ICAO EDB. If `None` is provided or `engine_uid` is unidentified, the default aircraft-engine combination from BADA4 is used.

#### Returns

`pandas.Series` – Assumed aircraft and engine type

`calculate_aircraft_performance(*, aircraft_type, altitude_ft, air_temperature, time, true_airspeed, aircraft_mass, engine_efficiency, fuel_flow, thrust, q_fuel, **kwargs)`

Calculate aircraft performance along a trajectory.

When `time` is not `None`, this method should be used for a single flight trajectory. Waypoints are coupled via the `time` parameter.

This method computes the rate of climb and descent (ROCD) to determine flight phases: “cruise”, “climb”, and “descent”. Performance metrics depend on this phase.

When `time` is `None`, this method can be used to simulate flight performance over an arbitrary sequence of flight waypoints by assuming nominal flight characteristics. In this case, each point is treated independently and all points are assumed to be in a “cruise” phase of the flight.

#### Parameters

- **aircraft\_type** (`str`) – Used to query the underlying model database for aircraft engine parameters.
- **altitude\_ft** (`npt.NDArray[np.float64]`) – Altitude at each waypoint, [*ft*]
- **air\_temperature** (`npt.NDArray[np.float64]`) – Ambient temperature for each waypoint, [*K*]
- **time** (`npt.NDArray[np.datetime64] | None`) – Waypoint time in `np.datetime64` format. If `None`, only drag force will be used in thrust calculations (ie, no vertical change and constant horizontal change). In addition, aircraft is assumed to be in cruise.
- **true\_airspeed** (`npt.NDArray[np.float64] | float | None`) – True airspeed for each waypoint, [*ms<sup>-1</sup>*]. If `None`, a nominal value is used.
- **aircraft\_mass** (`npt.NDArray[np.float64] | float`) – Aircraft mass for each waypoint, [*kg*].
- **engine\_efficiency** (`npt.NDArray[np.float64] | float | None`) – Override the engine efficiency at each waypoint.
- **fuel\_flow** (`npt.NDArray[np.float64] | float | None`) – Override the fuel flow at each waypoint, [*kg s<sup>-1</sup>*].
- **thrust** (`npt.NDArray[np.float64] | float | None`) – Override the thrust setting at each waypoint, [*N*].
- **q\_fuel** (`float`) – Lower calorific value (LCV) of fuel, [*J kg<sub>fuel</sub><sup>-1</sup>*].
- **\*\*kwargs** (`Any`) – Additional keyword arguments to pass to the model.

#### Returns

`AircraftPerformanceData` – Derived performance metrics at each waypoint.

#### default\_path

Default path to BADA data directories

#### get\_aircraft\_engine\_properties(*atyp\_icao, engine\_uid=None*)

Extract the aircraft performance and engine properties from the BADA database.

#### Parameters

- **atyp\_icao** (`str`) – ICAO aircraft type designator.
- **engine\_uid** (`str`) – Engine unique identification number from the ICAO EDB. If `None` is provided or `engine_uid` is unidentified, default aircraft-engine combination from BADA will be used. This parameter is unused for [BADA3](#); it is only considered for [BADA4](#).

**Returns**

AircraftProperties

**is\_within\_thrust\_limits**(\**atyp\_bada*, *altitude\_ft*, *air\_temperature*, *time*, *true\_airspeed*, *aircraft\_mass*, *thrust*, *flight\_phase*)

Determine whether thrust required at each waypoint is within bounds of BADA model.

If thrust is not provided as input, it will be computed according to BADA standards. Thrust limits are only defined for the BADA3 model. For BADA4, this function will raise a `NotImplementedError`.

**Parameters**

- **atyp\_bada** (`str`) – ICAO aircraft type designator (BADA 3), or long aircraft type designator (BADA 4).
- **altitude\_ft** (`npt.NDArray[np.float_]`) – Altitude at each waypoint, [*ft*]
- **air\_temperature** (`npt.NDArray[np.float_]`) – Ambient temperature for each waypoint, [*K*]
- **time** (`npt.NDArray[np.datetime64] | None`) – Waypoint time in *np.datetime64* format. If *None*, only drag force will be used in thrust calculations (ie, no vertical change and constant horizontal change). In addition, aircraft is assumed to be in cruise.
- **true\_airspeed** (`npt.NDArray[np.float_] | float | None`) – True airspeed for each waypoint, [*ms<sup>-1</sup>*]. If *None*, the nominal BADA cruise value is used.
- **aircraft\_mass** (`npt.NDArray[np.float_] | float | None`) – Aircraft mass for each waypoint, [*kg*]. If *None*, the nominal BADA value is used.
- **thrust** (`npt.NDArray[np.float_] | float | None`) – Override the thrust setting at each waypoint, [*math: N*].
- **flight\_phase** (`npt.NDArray[np.uint8] | flight.FlightPhase | None`) – Flight phase for each waypoint. If *None*, the flight phase is assumed to be cruise.

**Returns**

`npt.NDArray[np.bool_]` – Boolean array telling whether the thrust at each waypoint is within BADA trust limits

**long\_name** = 'Base of Aircraft Data (BADA) Revision 4.2'**name** = 'BADA4'**path**

Path to BADA data directory

**ptf\_params\_dict****synonym\_dict**

Aircraft type synonyms

**version**

BADA version. Currently only used on BADA3 class.

## 12.1 Publications

Publications including pycontrails:

- [Teoh *et al.*, 2022]
- [Teoh *et al.*, 2022]
- [Chevallier *et al.*, 2023]
- [Frías *et al.*, 2023]
- [Geraedts *et al.*, 2023]

If you use pycontrails in your work, please cite using the Zenodo DOI:

DOI: [10.5281/zenodo.11263806](https://doi.org/10.5281/zenodo.11263806)

## 12.2 References

References managed in public [Zotero Library](#)





## CONTRIBUTING

Contributions (bug reports, fixes, documentation, enhancements, ideas, ...) are welcome and appreciated.

To get started, find the best path for your contribution:

- Ask questions, discuss models, and present ideas in [Discussions](#).
- Report bugs or suggest changes as [Issues](#).
- Contribute fixes or improvements as [Pull Requests](#).

Please follow the [Github Community Guidelines](#) when participating in any of these forums.

The following emulates the [xarray contributing guidelines](#).

### 13.1 Contributing to documentation

Documentation is written in [reStructuredText](#) and synthesized with [Sphinx](#).

For small changes, [fork and edit](#) files directly in the Github interface.

For larger changes:

- Set up a [local development environment](#).
- Edit documents and notebooks following [existing conventions](#).
- Build and review the documentation locally:

```
# docs build to directory docs/_build/html  
$ make docs-build
```

- Submit changes as a [Pull Request](#).

### 13.2 Contributing to the code base

If you are new to development, see [xarray's Working with the code](#). This reference provides an introduction to version control, [git](#), [Github](#), [Forking](#), and [creating branches](#).

For more involved changes, create a [Github Issue](#) describing the intended changes first.

Once you're ready to develop:

- Set up a [local development environment](#).
- Implement updates. Make sure code is documented using [existing conventions](#).

- Ensure tests pass locally:

```
$ make test
```

- Submit changes as a [Pull Request](#).

## CHANGELOG

### 14.1 v0.51.0

#### 14.1.1 Breaking changes

- Geodesic interpolation is now used in `Flight.resample_and_fill` when the great circle distance between waypoints (rather than the total segment length including vertical displacement) exceeds a threshold. This may change the interpolation method used when resampling flight segments with lengths close to the geodesic interpolation threshold.
- Fixed typo in `thermo.c_pm` will decrease computed values of moist heat capacity with non-zero specific humidity. We expect the downstream impact on contrail predictions by ISSR, SAC, PCR, and Cocip models to be minimal.
- `np.nan` is now used as the default `fill_value` in `MetdataArray.to_polygon_feature` and `MetdataArray.to_polygon_feature_collection`. This ensures that NaN values are never included in polygon interiors unless a non-NaN `fill_value` is explicitly passed as a keyword argument.

#### 14.1.2 Features

- Add `ERA5ModelLevel` and `HRESModelLevel` interfaces for accessing ERA5 and HRES data on model levels.
- Update [ECMWF tutorial notebook](#) with instructions for using model-level datalibs.
- Add `HistogramMatching` humidity scaling calibrated for model-level ERA5 data.
- Modify `polygon.find_multipolygon`, `MetdataArray.to_polygon_feature`, `MetdataArray.to_polygon_feature_collection`, and `MetdataArray.to_polyhedra` to permit finding regions with values above or below a threshold.

#### 14.1.3 Fixes

- Use horizontal great circle distance to determine whether geodesic interpolation is used in `Flight.resample_and_fill`. This ensures geodesic interpolation is used between sufficiently distant waypoints even when one or both waypoints contain NaN altitude data.
- Fix typo in moist heat capacity equation `thermo.c_pm`.

### 14.1.4 Internals

- Create static copy of dataframe for determining pressure at ECMWF model levels.
- Extract model-level utilities in ARCOERA5 to their own module for reuse in ERA5ModelLevel and HRESModelLevel.
- Update Makefile so make ensure-era5-cached uses default cache directory when run locally.
- Bump pinned black and ruff versions.
- Disable mypy type checking on functools.wraps in support\_arraylike decorator to avoid error that appears starting on mypy 1.10.0.
- Update pinned Cocip test output values after moist heat capacity bugfix.
- Add static files with ECMWF model levels and model-level ERA5 RHI quantiles to packaged data.
- Pass exc\_type=ImportError to pytest.importorskip in test fixtures that use pycontrails extensions to suppress pytest warning when extensions are not installed.
- Bump minimum pytest version 8.2 to ensure the exc\_type kwarg is available.

## 14.2 v0.50.2

### 14.2.1 Breaking changes

- Replaces engine-uid 01P10IA024 with 04P10IA027 (superseded in the IACO EDB).

### 14.2.2 Features

- Adds support for the E190 aircraft type in the PS model
- Adds Flight.distance\_to\_coords which takes in a distance along a flight trajectory in meters and returns geodesic coordinates.
- Adds methods to ps\_operational\_limits to find the maximum and minimum mach numbers for a given set of operating conditions.
- Updates ICAO aircraft engine emissions databank (EDB) from v28c to v29b.

### 14.2.3 Internals

- New data for gaseous and nvPM emissions for PW812D, PW812GA, RR Trent 7000 with improved nvPM combustor
- Update nvPM emissions for IAE V2530-A5, PW1500G and PW1900G
- Update PS model coefficients to match the latest version provided by Ian Poll

## 14.3 v0.50.1

### 14.3.1 Breaking changes

- Updates to flight resampling logic now ensure that resampled waypoints include any and all times between flight start and end times that are a multiple of the resampling frequency. This may add an additional waypoint to some flights after resampling, and may result in `Flight.resample_and_fill` returning a flight with a single waypoint rather than an empty flight.

### 14.3.2 Features

- Refine CoCiP contrail initialization model based on the work of Unterstrasser (2016, doi:10.5194/acp-16-2059-2016) and Karcher (2018, doi:10.1038/s41467-018-04068-0).
  - This update implements a refined parameterization of the survival fraction of contrail ice crystal number after the wake vortex phase (`f_surv`). The parameterised model was developed by Unterstrasser (2016) based on outputs provided by large eddy simulations, and improves agreement with LES output relative to the default survival fraction parameterization in CoCiP.
  - These changes replicate Fig. 4 of Karcher (2018), where `f_surv` now depends on the initial number of ice crystals. These effects are particularly important, especially in the “soot-poor” scenario where the number fraction of contrail ice crystals that survives the wake vortex phase could be larger than the mass fraction, because the particles are larger in size.
  - This also improves upon the existing assumption in CoCiP, where the survival fraction is estimated as the change in contrail ice water content (by mass) before and after the wake vortex phase. The Unterstrasser (2016) parameterization can be used in CoCiP by setting a new parameter, `unterstrasser_ice_survival_fraction`, to `True`.
- Adds optional ATR20 to CoCiPGrid model.

### 14.3.3 Fixes

- Update flight resampling logic to align with expected behavior for very short flights, which is now detailed in the `Flight.resample_and_fill` docstring.

### 14.3.4 Internals

- Adds a parameter to `CoCipParams`, `unterstrasser_ice_survival_fraction`, that activates the Unterstrasser (2016) survival parameterization when set to `True`. This is disabled by default, and only implemented for CoCiP. `CoCiPGrid` will produce an error if run with `unterstrasser_ice_survival_fraction=True`.
- Modifies `CoCiPGrid` so that setting `compute_atr_20` (defined in `CoCipParams`) to `True` adds `global_yearly_mean_rf` and `atr20` to CoCiP-grid output.
- Replaces `pycontrails.datalib.GOES` ash convention label “MIT” with “SEVIRI”
- Modifies meteorology time step selection logic in `CoCiPGrid` to reduce duplicate chunk downloads when reading from remote zarr stores.
- Updates unit tests for `xarray v2024.03.0`, which introduced changes to `netCDF` decoding that slightly alter decoded values. Note that some unit tests will fail for earlier `xarray` versions.
- Updates `RegularGridInterpolator` to fall back on legacy `scipy` implementations of tensor-product spline methods when using `scipy` versions 1.13.0 and later.

## 14.4 v0.50.0

### 14.4.1 Features

- Add ARCOERA5 interface for accessing ARCO ERA5 model level data. This interface requires the `metview` python package.
- Add [ARCO ERA5 tutorial notebook](#) highlighting the new interface.
- Add support to output contrail warming impact in ATR20

### 14.4.2 Breaking changes

- Reduce `CocipParams.met_level_buffer` from `(200, 200)` to `(40, 40)`. This change is motivated by the observation that the previous buffer was unnecessarily large and caused additional memory overhead. The new buffer is more in line with the typical vertical advection path of a contrail.

### 14.4.3 Fixes

- Raise `ValueError` when `list[Flight]` source is provided to `Cocip` and the `copy_source` parameter is set to `False`. Previously the source was copied in this case regardless of the `copy_source` parameter.
- Fix broken link in the [model level notebook](#).

### 14.4.4 Internals

- The `datalib.parse_pressure_levels` now sorts the pressure levels in ascending order and raises a `ValueError` if the input pressure levels are duplicated or have mixed signs.
- Add new `MetDataSource.is_single_level` property.
- Add `ecmwf.Divergence` (a subclass of `MetVariable`) for accessing ERA5 divergence data.
- Update the [specific humidity interpolation notebook](#) to use the new ARCOERA5 interface.
- Adds two parameters to `CoCipParams`, `compute_atr20` and `global_rf_to_atr20_factor`. Setting the former to `True` will add both `global_yearly_mean_rf` and `atr20` to the CoCiP output.
- Bump minimum `pytest` version to 8.1 to avoid failures in release workflow.

## 14.5 v0.49.5

### 14.5.1 Fixes

- Fix bug in which `Cocip._process_rad` dropped radiation dataset attributes introduced in v0.49.4.

## 14.6 v0.49.4

### 14.6.1 Breaking changes

- Remove the `CocipGridParams.met_slice_dt` parameter. Now met downselection is handled automatically during contrail evolution. When the met and rad data passed into `CocipGrid` are not already loaded into memory, this update may make `CocipGrid` slightly more performant.
- No longer explicitly load met and rad time slices into memory in `CocipGrid`. This now only occurs downstream when interpolation is performed. This change better aligns `CocipGrid` with other pycontrails models.
- Remove the `cocipgrid.cocip_time_handling` module. Any useful tooling has been moved directly to the `cocipgrid.cocip_grid` module.
- Remove the `CocipGrid.timedict` attribute. Add a `CocipGrid.timesteps` attribute. This is now applied in the same manner that the `Cocip` model uses its `timesteps` attribute.
- Simplify the runtime estimate used in constructing the `CocipGrid` `tqdm` progress bar. The new estimate is less precise than the previous estimate and should not be trusted for long-running simulations.
- Deprecate `MetBase.variables` in favor of `MetBase.indexes`.

### 14.6.2 Features

- Add support for 9 additional aircraft types in the [Poll-Schumann \(PS\)](#) aircraft performance model. The new aircraft types are:
  - A338
  - A339
  - A35K
  - B37M
  - B38M
  - B39M
  - B78X
  - BCS1
  - BCS3
- Modify PS coefficients for B788, B789, and A359.
- Support running `CocipGrid` on meteorology data without a uniformly-spaced time dimension. The `CocipGrid` implementation now no longer assumes `met["time"].diff()` is constant.
- Add a `MetDataset.downselect_met` method. This performs a met downselection in analogy with `GeoVectorDataset.downselect_met`.

### 14.6.3 Fixes

- Improve clarity of warnings produced when meteorology data doesn't cover the time range required by a gridded CoCiP model.
- No longer emit pandas warning when `Flight.resample_and_fill(..., drop=True, ...)` is called with non-float data.
- Correctly handle CocipGrid rad data with non-uniform time steps.

## 14.7 v0.49.3

### 14.7.1 Features

- Re-organize notebooks in documentation.
- Add new `model level` tutorial notebook.
- Add new high-level `Flight.clean_and_resample` method. This method parallels the `Flight.resample_and_fill` method but performs additional altitude filtering. In essence, this method is a combination of `Flight.filter_altitude` and `Flight.resample_and_fill`.

### 14.7.2 Breaking changes

- Remove `Flight.fit_altitude` method in favor of `Flight.filter_altitude`. The new method now only applies a median filter during cruise flight phase.

### 14.7.3 Fixes

- Remove opaque warning issued when all `tau_contrail` values are nan in Cocip evolution.
- Emit warning in `Cocip.eval` if the advected contrail is blown outside of the domain of the met data.
- Remove empty flights in `Fleet.from_seq`. Issue warning if an empty flight is encountered.
- Emit warning when `Flight.resample_and_fill` returns an empty flight.

### 14.7.4 Internals

- Modify test workflow to use Makefile recipes and ensure early failures are detected in CI.
- Pin `black` and `ruff` versions for consistency between local and CI/CD environments.
- Improve development documentation.
- Improve handling of missing credentials in tests (`make nb-test`, `make doctest`).
- Update time frequency aliases for `pandas 2.2` compatibility.
- Update cython annotations for `scipy 1.12` compatibility.
- Improve notebook output testing capabilities (`make nb-test`).
- Add new convenience Make recipe to execute all notebooks in the docs (`make nb-execute`).
- Add new Make recipe to cleanup notebooks (`make nb-clean`).



- Add pre-commit hook to check if notebooks are *clean*.
- Re-organize notebooks in documentation.
- Clean up contributing and develop documentation.
- Automatically parse `np.timedelta64`-like model params in `Model.update_params`.

## 14.8 v0.49.2

### 14.8.1 Features

- Support `pandas Copy-on-Write`. This can be enabled with `pd.set_option("mode.copy_on_write", True)` or by setting the `PANDAS_COPY_ON_WRITE` environment variable.

### 14.8.2 Fixes

- Ensure the `Flight.fuel` attribute is preserved for the `Flight.filter` method.
- Ensure the `Fleet.fl_attrs` attribute is preserved for the `Fleet.filter` method.
- Raise `ValueError` when `Flight.sort` or `Fleet.sort` is called. Both of these subclasses assume a custom sorting order that is enforced in their constructors.
- Always correct intermediate thrust coefficients computed in the `PSGrid` model. This correction is already enabled by default in the `PSFlight` model.
- Include `attr` fields in the `ValueError` message raised in `CocipGrid` when not all aircraft performance variables are present on the `source` parameter.
- Allow `mach_number` as a replacement for `true_airspeed` in `CocipGrid` aircraft performance determination.

### 14.8.3 Internals

- Make `Fuel` and its subclasses `JetA`, `SAFBlend`, and `HydrogenFuel` frozen.
- No longer copy `met` when `Models.downselect_met` is called. In some modes of operation, this reduces the memory footprint of the model.
- Update codebase for more harmony with [PDEP 8](#) and `Copy-on-Write` semantics.
- Add `default` parameter to the `VectorDataset.get_data_or_attr` method.

## 14.9 v0.49.1

### 14.9.1 Fixes

- Fix memory bottleneck in `CocipGrid` simulation by avoiding expensive call to `pd.concat`.
- Require `oldest-supported-numpy` for python 3.12. Remove logic for `numpy 1.26.0rc1` in the `pyproject.toml` build system.

## 14.10 v0.49.0

This release updates the Poll-Schumann (PS) aircraft performance model to version 2.0. It also includes a number of bug fixes and internal improvements.

### 14.10.1 Features

- Add convenience `Fleet.resample_and_fill`.
- Update the PS model aircraft-engine parameters.
- Improve PS model accuracy in fuel consumption estimates.
- Improve PS model accuracy in overall propulsive efficiency estimates.
- Include additional guardrails in the PS model to constrain the operational limits of different aircraft-engine types, i.e., the maximum permitted Mach number by altitude, maximum available thrust coefficient, maximum lift coefficient, and maximum allowable aircraft mass.

### 14.10.2 Fixes

- Update polygon algorithm to use `shapely.Polygon` instead of `shapely.LinearRing` for contours with at least 4 vertices.
- Fix `Fleet.to_flight_list` to avoid duplicating global attributes on the child `Flight` instances.
- Add `__slots__` to `GeoVectorDataset`, `Flight`, and `Fleet`. The base `VectorDataset` class already uses `__slots__`.
- Add `Fleet.copy` method.
- Improve `Fleet.__init__` implementation.
- Ensure source parameter is mutated in `CocipGrid.eval` when the model parameter `copy_source=False`.

## 14.11 v0.48.1

### 14.11.1 Features

- Generalize `met.shift_longitude()` to translate longitude coordinates onto any domain bounds.
- Add `VectorDataset.to_dict()` methods to output Vector data as dictionary. This method enables `Flight.to_dict()` objects to be serialized for input to the [Contrails API](#).
- Add `VectorDataset.from_dict()` class method to create `VectorDataset` class from dictionary.
- Support more time formats, including timezone aware times, in `VectorDataset` creation. All timezone aware `time` coordinates are converted to UTC and stripped of timezone identifier.

### 14.11.2 Fixes

- Fix issue in the `wake_vortex.max_downward_displacement` function in which float32 dtypes were promoted to float64 dtypes in certain cases.
- Ignore empty vectors in `VectorDataset.sum`.

### 14.11.3 Internals

- Set `frozen=True` on the `MetVariable` dataclass.
- Test against python 3.12 in the GitHub Actions CI. Use python 3.12 the docs and doctest workflows.

## 14.12 v0.48.0

This release includes a number of breaking changes and new features. If upgrading from a previous version of `pycontrails`, please read the changelog carefully. Open an [issue](#) if you experience problems.

### 14.12.1 Breaking changes

- When running `Cocip` and other `pycontrails` models, the `met` and `rad` parameter must now contain predefined metadata attributes `provider`, `dataset`, and `product` describing the met source. An error will now be raised in `Cocip` if these attributes are not present.
- Deprecate passing arbitrary `kwargs` into the `MetdataArray` constructor.
- No longer convert accumulated radiation data to average instantaneous data in ERA5 and HRES interfaces. This logic is now handled downstream by the model (e.g., `Cocip`). This change allows for more flexibility in the `rad` data passed into the model and avoids unnecessary computation in the `MetDataSource` interfaces.
- Add new `MetDataSource.set_met_source_metadata` abstract method. This should be called within the implementing class `open_metdataset` method.
- No longer take a finite difference in the time dimension for HRES radiation data. This is now also handled natively in `Cocip`.
- No longer convert relative humidity from a percentage to a fraction in ERA5 and HRES interfaces.
- Require the HRES `stream` parameter to be one of `["oper", "enfo"]`. Require the `field_type` parameter to be one of `["fc", "pf", "cf", "an"]`.
- Remove the `steps` and `step_offset` properties in the `GFSForecast` interface. Now the `timesteps` attribute is the only source of truth for determining AWS S3 keys. Change the `filename` method to take in a `datetime` timestep instead of an `int` step. No longer assign the first step radiation data to the zeroth step.
- Change the return type of `ISSR.eval`, `SAC.eval`, and `PCR.eval` from `MetdataArray` to `MetDataset`. This is more consistent with the return type of other `pycontrails` models and more closely mirrors the behavior of vector models. Set output `attrs` metadata on the global `MetDataset` instead of the individual `MetdataArray` in each case.

### 14.12.2 Features

- Rewrite parts of the `pycontrails.core.datalib` module for higher performance and readability.
- Add optional `attrs` and `attrs_kwargs` parameters to `MetDataset` constructor. This allows the user to customize the attributes on the underlying `xarray.Dataset` object. This update makes `MetDataset` more consistent with `VectorDataset`.
- Add three new properties `provider_attr`, `dataset_attr`, and `product_attr` to `MetDataset`. These properties give metadata describing the underlying meteorological data source.
- Add new `Model.transfer_met_source_attrs` method for more consistent handling of met source metadata on the source parameter passed into `Model.eval`.
- No longer require `geopotential` data when computing `tau_cirrus`. If neither `geopotential` nor `geopotential_height` are available, `geopotential` is approximated from the geometric height. No longer require `geopotential` on the `met` parameter in `Cocip` or `CocipGrid`.
- Remove the `Cocip.shift_radiation_time` parameter. This is now inferred directly from the `rad` metadata. An error is raised if the necessary metadata is not present.
- Allow `Cocip` to run with both instantaneous ( $\bar{W} \text{ m}^{-2}$ ) and accumulated ( $J \text{ m}^{-2}$ ) radiation data.
- Allow `Cocip` to run with accumulated ECMWF HRES radiation data.

### 14.12.3 Fixes

- Correct radiation unit in the ACCF wrapper model [#64]. Both instantaneous ( $\bar{W} \text{ m}^{-2}$ ) and accumulated ( $J \text{ m}^{-2}$ ) radiation data are now supported, and the ACCF wrapper will handle each appropriately.
- Avoid unnecessary writing and reading of temporary files in `ERA5.cache_dataset` and `HRES.cache_dataset`.
- Fix timestep resolution bug in `GFSForecast`. When the `grid` parameter is 0.5 or 1.0, forecasts are only available every 3 hours. Previously, the `timesteps` property would define an hourly timestep.

### 14.12.4 Internals

- Include `name` parameter in `MetdataArray` constructor.
- Make the `coordinates.slice_domain` function slightly more performant by explicitly dropping nan values from the `request` parameter.
- Round unwieldy floating point numbers in `GeoVectorDataset._display_attrs`.
- Remove the `ecmwflibs` package from the `ecmwf` optional dependencies.
- Add NPY to `ruff` rules.
- Add convenience `MetDataset.standardize_variables` method.
- Remove the `p_settings` attribute on the ACCF interface. This is now constructed internally within `ACCF.eval`. Replace the `ACCF._update_accf_config` method with a `_get_accf_config` function.

## 14.13 v0.47.3

### 14.13.1 Fixes

- Strengthen `correct_fuel_flow` in the `PSmodel` to account for descent conditions.
- Clip the denominator computed in `pycontrails.physics.jet.equivalent_fuel_flow_rate_at_cruise`.
- Ensure the token used within GitHub workflows has the fewest privileges required. Set top-level permissions to `none` in each workflow file. Remove unnecessary permissions previously used in the `google-github-actions/auth` action.
- Fix bug in `radiative_forcing.effective_tau_contrail` identified in [#99](#).
- Fix the unit for `vertical_velocity` in `geo.advect_level`.
- Fix bug appearing in `Flight._geodesic_interpolation` in which a single initial large gap was not interpolated with a geodesic path.

### 14.13.2 Internals

- Add `FlightPhase` to the `pycontrails` namespace.

## 14.14 v0.47.2

### 14.14.1 Features

- New experimental GOES interface for downloading and visualizing GOES-16 satellite imagery.
- Add new [GOES example notebook](#) highlighting the interface.
- Build python 3.12 wheels for Linux, macOS, and Windows on release. This is in addition to the existing python 3.9, 3.10, and 3.11 wheels.

### 14.14.2 Fixes

- Use the experimental version number parameter `E` in `pycontrails.ecmwf.hres.get_forecast_filename`. Update the logic involved in setting the dissemination data stream indicator `S`.
- Change the behavior of `_altitude_interpolation` method that is called within `resample_and_fill`. Step climbs are now placed in the middle of long flight segments. Descents continue to occur at the end of segments.

### 14.14.3 Internals

- Provide consistent `ModuleNotFoundError` messages when optional dependencies are not installed.
- Move the `synthetic_flight` module into the `pycontrails.ext` namespace.

## 14.15 v0.47.1

### 14.15.1 Fixes

- Fix bug in PSGrid in which the met data was assumed to be already loaded into memory. This caused errors when running PSGrid with a MetDataset source.
- Fix bug (#86) in which Cocip.eval loses the source fuel type. Instead of instantiating a new Flight or Fleet instance with the default fuel type, the Cocip.\_bundle\_results method now overwrites the self.source.data attribute with the bundled predictions.
- Avoid a memory explosion when running Cocip on a large non-dask-backed met parameter. Previously the tau\_cirrus computation would be performed in memory over the entire met dataset.
- Replace datetime.utcnowfromtimestamp (deprecated in python 3.12) with datetime.fromtimestamp.
- Explicitly support python 3.12 in the pyproject.toml build system.

### 14.15.2 Internals

- Add compute\_tau\_cirrus\_in\_model\_init parameter to CocipParams. This controls whether to compute the cirrus optical depth in Cocip.\_\_init\_\_ or Cocip.eval. When set to "auto" (the default), the tau\_cirrus is computed in Cocip.\_\_init\_\_ if and only if the met parameter is dask-backed.
- Change data requirements for the EmpiricalGrid aircraft performance model.
- Consolidate ERA5.cache\_dataset and HRES.cache\_dataset onto common ECMWFAPI.cache\_dataset method. Previously the child implementations were identical.
- No longer require the pyproj package as a dependency. This is now an optional dependency, and can be installed with pip install pycontrails[pyproj].

## 14.16 v0.47.0

Implement a Poll-Schumann (PSGrid) theoretical aircraft performance over a grid.

### 14.16.1 Breaking changes

- Move the pycontrails.models.aircraft\_performance module to pycontrails.core.aircraft\_performance.
- Rename PSModel -> PSFlight.

### 14.16.2 Fixes

- Use the instance fuel attribute in the Fleet.to\_flight\_list method. Previously, the default JetA fuel was always used.
- Ensure the Fleet.fuel attribute is inferred from the underlying sequence of flights in the Fleet.from\_seq method.

### 14.16.3 Features

- Implement the PSGrid model. For a given aircraft type and position, this model computes optimal aircraft performance at cruise conditions. In particular, this model can be used to estimate fuel flow, engine efficiency, and aircraft mass at cruise. In particular, the PSGrid model can now be used in conjunction with CocipGrid to simulate contrail formation over a grid.
- Refactor the Emissions model so that `Emissions.eval` runs with `source: GeoVectorDataset`. Previously, the `eval` method required a `Flight` instance for the `source` parameter. This change allows the Emissions model to run more seamlessly as a sub-model of a gridded model (ie, CocipGrid),
- No longer require `pycontrails-bada` to import or run the CocipGrid model. Instead, the `CocipGridParams.aircraft_performance` parameter can be set to any `AircraftPerformanceGrid` instance. This allows the CocipGrid model to run with any aircraft performance model that implements the `AircraftPerformanceGrid` interface.
- Add experimental `EmpiricalAircraftPerformanceGrid` model.
- Add convenience `GeoVectorDataset.T_isa` method to compute the ISA temperature at each point.

### 14.16.4 Internals

- Add optional `climb_descend_at_end` parameter to the `Flight.resample_and_fill` method. If `True`, the climb or descent will be placed at the end of each segment rather than the start.
- Define `AircraftPerformanceGridParams`, `AircraftPerformanceGrid`, and `AircraftPerformanceGridData` abstract interfaces for gridded aircraft performance models.
- Add `set_attr` parameter to `Models.get_source_param`.
- Better handle `source`, `source.attrs`, and `params` customizations in CocipGrid.
- Include additional classes and functions in the `pycontrails.models.emissions` module.
- Hardcode the paths to the static data files used in the Emissions and PSFlight models. Previously these were configurable by model parameters.
- Add `altitude_ft` parameter to the `GeoVectorDataset` constructor. Warn if at least two of `altitude_ft`, `altitude`, and `level` are provided.
- Allow instantiation of `Model` instances with `params: ModelParams`. Previously, the `params` parameter was required to be a `dict`. The current implementation checks that the `params` parameter is either a `dict` or has type `default_params` on the `Model` class.

## 14.17 v0.46.0

Support “dry advection” simulation.

### 14.17.1 Features

- Add new `DryAdvection` model to simulate sediment-free advection of an aircraft's exhaust plume. This model is experimental and may change in future releases. By default, the current implementation simulates plume geometry as a cylinder with an elliptical cross section (the same geometry assumed in CoCiP). Wind shear perturbs the ellipse azimuth, width, and depth over the plume evolution. The `DryAdvection` model may also be used to simulate advection without wind-shear effects by setting the model parameters `azimuth`, `width`, and `depth` to `None`.
- Add new [Dry Advection example notebook](#) highlighting the new `DryAdvection` model and comparing it to the `Cocip` model.
- Add optional `fill_value` parameter to `VectorDataset.sum`.

### 14.17.2 Fixes

- (#80) Fix unit error in `wake_vortex.turbulent_kinetic_energy_dissipation_rate`. This fix affects the estimate of wake vortex max downward displacement and slightly changes `Cocip` predictions.
- Change the implementation of `Flight.resample_and_fill` so that lat-lon interpolation is linear in time. Previously, the timestamp associated to a waypoint was floored according to the resampling frequency without updating the position accordingly. This caused errors in segment calculations (e.g., true airspeed).

### 14.17.3 Internals

- Add optional `keep_original_index` parameter to the `Flight.resample_and_fill` method. If `True`, the time original index is preserved in the output in addition to the new time index obtained by resampling.
- Improve docstrings in `wake_vortex` module
- Rename `wake_vortex` functions to remove `get_` prefix at the start of each function name.
- Add `pytest` command line parameter `--regenerate-results` to regenerate static test fixture results. Automate in `make` recipe `make pytest-regenerate-results`.
- Update handling of `GeoVectorDataset.required_keys` the `GeoVectorDataset` constructor. Add class variable `GeoVectorDataset.vertical_keys` for handling the vertical dimension.
- Rename `CocipParam.max_contrail_depth` -> `CocipParam.max_depth`.
- Add `units.dt_to_seconds` function to convert `np.timedelta64` to `float` seconds.
- Rename `thermo.p_dz` -> `thermo.pressure_dz`.

## 14.18 v0.45.0

Add experimental support for simulating radiative effects due to contrail-contrail overlap.



### 14.18.1 Features

- Support simulating contrail overlap when running the Cocip model with a Fleet source. The `contrail_contrail_overlapping` and `dz_overlap_m` parameters govern the overlap calculation. This mode of calculation is still experimental and may change in future releases.
- Rewrite the `pycontrails.models.cocip.output` modules into a single `pycontrails.cocip.output_formats` module. The new module supports flight waypoint summary statistics, contrail waypoints summary statistics, gridded outputs, and time-slice outputs.
- Add new `GeoVectorDataset.to_lon_lat_grid` method. This method can be thought of as a partial inverse to the `MetDataset.to_vector` method. The current implementation is brittle and may be revised in a future release.

### 14.18.2 Fixes

- Extend `Models.set_source_met` to allow `interpolation_q_method="cubic-spline"` when working with `MetDataset` source (ie, so-called gridded models). Previously a `NotImplementedError` was raised.
- Ensure the `Flight.copy` implementation works with `Fleet` instances as well.
- Avoid looping over keys twice in `VectorDataset.broadcast_attrs`. This is a slight performance enhancement.
- Fix `Fleet` signature for compatibility with `Flight`.
- Fix a few hard-coded assumptions in broadcasting aircraft performance and emissions when running `Cocip` with a `Fleet` source. The previous implementation did not consider the possibility of aircraft performance variables on `Flight.data` and `Flight.attrs` separately.

### 14.18.3 Internals

- Add optional `raise_error` parameter to the `VectorDataset.broadcast_attrs` method.
- Update `Fleet` internals.

## 14.19 v0.44.2

### 14.19.1 Fixes

- Narrow type hints on the ABC `AircraftPerformance` model. The `AircraftPerformance.eval` method requires a `Flight` object for the source parameter.
- In `PSFlight.eval`, explicitly set any aircraft performance data at waypoints with zero true airspeed to `np.nan`. This avoids numpy `RuntimeWarnings` without affecting the results.
- Fix corner-case in the `polygon.buffer_and_clean` function in which the polygon created by buffering the `opencv` contour is not valid. Now a second attempt to buffer the polygon is made with a smaller buffer distance.
- Ignore `RuntimeError` raised in `scipy.optimize.newton` if the maximum number of iterations is reached before convergence. This is a workaround for occasional false positive convergence warnings. The `pycontrails` use-case may be related to [this GitHub issue](#).
- Update the `Models.__init__` warnings when `humidity_scaling` is not provided. The previous warning provided an outdated code example.

- Ensure the `interpolation_q_method` used in a parent model is passed into the `humidity_scaling` child model in the `Models.__init__` method. If the two `interpolation_q_method` values are different, a warning is issued. This could be extended to other model parameters in the future.

### 14.19.2 Features

- Enable `ExponentialBoostLatitudeCorrectionHumidityScaling` humidity scaling for the model parameter `interpolation_q_method="cubic_spline"`.
- Add `GFS notebook` example.

### 14.19.3 Breaking changes

- Remove `ExponentialBoostLatitudeCorrectionHumidityScalingParams`. These parameters are now hard-coded in the `ExponentialBoostLatitudeCorrectionHumidityScaling` model.

## 14.20 v0.44.1

### 14.20.1 Breaking changes

- By default, call `xr.open_mfdataset` with `lock=False` in the `MetDataSource.open_dataset` method. This helps alleviate a dask threading issue similar to [this GitHub issue](#).

### 14.20.2 Fixes

- Support `MetDataset` source in the `HistogramMatching` humidity scaling model. Previously only `GeoVectorDataset` sources were explicitly supported.
- Replace `np.gradient` with `dask.array.gradient` in the `tau_cirrus` module. This ensures that the computation is done lazily for dask-backed arrays.
- Round to 6 digits in the `polygon.determine_buffer` function. This avoid unnecessary warnings for rounding errors.
- Fix type hint for `opencv-python 4.8.0.74`.

### 14.20.3 Internals

- Take more care with `float` and `int` types in the `contrail_properties` module. Prefer `np.clip` to `np.where` or `np.maximum` for clipping values.
- Support `air_temperature` in `CocipGrid` verbose formation outputs.
- Remove `pytest-timeout` dev dependency.

## 14.21 v0.44.0

Support for the Poll-Schumann aircraft performance model.

### 14.21.1 Features

- Implement a basic working version of the Poll-Schumann (PS) aircraft performance model. This is experimental and may undergo revision in future releases. The PS Model currently supports the following 53 aircraft types:
  - A30B
  - A306
  - A310
  - A313
  - A318
  - A319
  - A320
  - A321
  - A332
  - A333
  - A342
  - A343
  - A345
  - A346
  - A359
  - A388
  - B712
  - B732
  - B733
  - B734
  - B735
  - B736
  - B737
  - B738
  - B739
  - B742
  - B743
  - B744
  - B748

- B752
- B753
- B762
- B763
- B764
- B77L
- B772
- B77W
- B773
- B788
- B789
- E135
- E145
- E170
- E195
- MD82
- MD83
- GLF5
- CRJ9
- DC93
- RJ1H
- B722
- A20N
- A21N

The “gridded” version of this model is not yet implemented. This will be added in a future release.

- Improve the runtime of instantiating the `Emissions` model by a factor of 10-15x. This translates to a time savings of several hundred milliseconds on modern hardware. This improvement is achieved by more efficient parsing of the underlying static data and by deferring the construction of the interpolation artifacts until they are needed.
- Automatically use a default engine type from the aircraft type in the `Emissions` model if an `engine_uid` parameter is not included on the source. This itself is configurable via the `use_default_engine_uid` parameter on the `Emissions` model. The default mappings from aircraft types to engines is included in `pycontrails/models/emissions/static/default-engine-uids.csv`.

### 14.21.2 Breaking changes

- Remove the `Aircraft` dataclass from `Flight` instantiation. Any code previously using this should instead directly pass additional `attrs` to the `Flight` constructor.
- The `load_factor` is now required in `AircraftPerformance` models. The global `DEFAULT_LOAD_FACTOR` constant in `pycontrails.models.aircraft_performance` provides a reasonable default. This is currently set to 0.7.
- Use a `takeoff_mass` parameter in `AircraftPerformance` models if provided in the `source.attrs` data.
- No longer use a reference mass `ref_mass` in `AircraftPerformance` models. This is replaced by the `takeoff_mass` parameter if provided, or calculated from operating empty operating mass, max payload mass, total fuel consumption mass, reserve fuel mass, and the load factor.

### 14.21.3 Fixes

- Remove the `fuel` parameter from the `Emissions` model. This is inferred directly from the `source` parameter in `Emissions.eval`.
- Fix edge cases in the `jet.reserve_fuel_requirements` implementation. The previous version would return `nan` for some combinations of `fuel_flow` and `segment_phase` variables.
- Fix a spelling mistake: `units.kelvin_to_celcius` -> `units.kelvin_to_celsius`.

### 14.21.4 Internals

- Use `ruff` in place of `pydocstyle` for linting docstrings.
- Use `ruff` in place of `isort` for sorting imports.
- Update the `AircraftPerformance` template based on the patterns used in the new `PSFlight` class. This may change again in the future.

## 14.22 v0.43.0

Support experimental interpolation against gridded specific humidity. Add new data-driven humidity scaling models.

### 14.22.1 Features

- Add new experimental `interpolation_q_method` field to the `ModelParams` data class. This parameter controls the interpolation methodology when interpolation against gridded specific humidity. The possible values are:
  - `None`: Interpolate linearly against specific humidity. This is the default behavior and is the same as the previous behavior.
  - `"cubic-spline"`: Apply cubic-spline scaling to the interpolation table vertical coordinate before interpolating linearly against specific humidity.
  - `"log-q-log-p"`: Interpolate in the log-log domain against specific humidity and pressure.

This interpolation parameter is used when calling `pycontrails.core.models.interpolate_met`. It can also be used directly with the new lower-level `pycontrails.core.models.interpolate_gridded_specific_humidity` function.

- Add new experimental `HistogramMatching` humidity scaling model to match RHi values against IAGOS observations. The previous `HistogramMatchingWithEckel` scaling is still available when working with ERA5 ensemble members.
- Add new [tutorial](#) discussing the new specific humidity interpolation methodology.

### 14.22.2 Breaking changes

- Add an optional `q_method` parameter to the `pycontrails.core.models.interpolate_met` function. The default value `None` agrees with the previous behavior.
- Change function signatures in the `cocip.py` module for consistency. The `interp_kwargs` parameter is now unpacked in the `calc_timestep_meterology` signature. Rename `kwargs` to `interp_kwargs` where appropriate.
- Remove the `cache_size` parameter in `MetDataset.from_zarr`. Previously this parameter allowed the user to wrap the Zarr store in a `LRUCacheStore` to improve performance. Changes to Zarr internals have broken this approach. Custom Zarr patterns should now be handled outside of `pycontrails`.

### 14.22.3 Fixes

- Recompute and extend quantiles for histogram matching humidity scaling. Quantiles are now available for each combination of `q_method` and the following ERA5 data products: reanalysis and ensemble members 0-9. This data is available as a parquet file and is packaged with `pycontrails`.
- Fix the precomputed Eckel coefficients. Previous values were computed for different interpolation assumptions and were not correct for the default interpolation method.
- Clip the scaled humidity values computed by the `humidity_scaling.eckel_scaling` function to ensure that they are non-negative. Previously, both relative and specific humidity values arising from Eckel scaling could be negative.
- Handle edge case of all NaN values in the `T_critical_sac` function in the `sac.py` module.
- Avoid extraneous copy when calling `VectorDataset.sum`.
- Officially support `numpy v1.25.0`.
- Set a `pytest-timeout` limit for tests in `tests/unit/test_ecmwf.py` to avoid hanging tests.
- Add `forecast_step` parameter to the ACCF model.

### 14.22.4 Internals

- Refactor auxillary functions used by `HistogramMatchingWithEckel` to better isolated histogram matching from Eckel scaling.
- Refactor `intersect_met` method in `pycontrails.core.models` to handle experimental `q_method` parameter.
- Include a `q_method` field in `Model.interp_kwargs`.
- Include precomputed humidity lapse rate values in the new `pycontrails.core.models._load_spline` function.
- Move the `humidity_scaling.py` module into its own subdirectory within `pycontrails/models`.

## 14.23 v0.42.2

Re-release of *v0.42.1*.

## 14.24 v0.42.1

### 14.24.1 Features

- Add new `HistogramMatchingWithEckel` experimental humidity scaling model. This is still a work in progress.
- Add new `Flight.fit_altitude` method which uses piecewise linear fitting to smooth a flight profile.
- Add new `pycontrails.core.flightplan` module for parsing ATC flight plans between string and dictionary representations.
- Add new `airports` and `flightplan` examples.

### 14.24.2 Breaking changes

- No longer attach empty fields “sdr”, “rsr”, “olr”, “rf\_sw”, “rf\_lw”, “rf\_net” onto the `source` parameter in `Cocip.eval` when the flight doesn’t generate any persistent contrails.
- Remove params `humidity_scaling`, `rhi_adj_uncertainty`, and `rhi_boost_exponent_uncertainty` from `CocipUncertaintyParams`.
- Change the default value for `parallel` from `True` to `False` in `xr.open_mfdataset`. This can be overridden by setting the `xr_kwargs` parameter in `ERA5.open_metdataset`.

### 14.24.3 Fixes

- Fix a unit test (`test_dtypes.py::test_issr_sac_grid_output`) that occasionally hangs. There may be another test in `test_ecmwf.py` that suffers from the same issue.
- Fix issue encountered in `Cocip.eval` when concatenating contrails with inconsistent values for `_out_of_bounds`. This is only relevant when running the model with the experimental parameter `interpolation_use_indices=True`.
- Add a `Fleet.max_distance_gap` property. The previous property on the `Flight` class was not applicable to `Fleet` instances.
- Fix warning in `Flight` class to correctly suggest adding kwarg `drop_duplicated_times`.
- Fix an issue in the `VectorDataset` constructor with a `data` parameter of type `pd.DataFrame`. Previously, time data was rewritten to the underlying `DataFrame`. This could cause copy-on-write issues if the `DataFrame` was a view of another `DataFrame`. This is now avoided.

#### 14.24.4 Internals

- When possible, replace type hints `np.ndarray` -> `np.typing.NDArray[np.float_]` in the `cocip`, `cocip_params`, `cocip_uncertainty`, `radiative_forcing`, and `wake_vortex` modules.
- Slight performance enhancements in the `radiative_forcing` module.
- Change the default value of `u_wind` and `v_wind` from `None` to `0` in `Flight.segment_true_airspeed`. This makes more sense semantically.

### 14.25 v0.42.0

Phase 1 of the Spire datalib, which contains functions to identify unique flight trajectories from the raw Spire ADS-B data.

#### 14.25.1 Features

- Add a `pycontrails.core.airport` module to read and process the global airport database, which can be used to identify the nearest airport to a given coordinate.
- Add a `pycontrails.datalib.spire.clean` function to remove and address erroneous waypoints in the raw Spire ADS-B data.
- Add a `pycontrails.datalib.spire.filter_altitude` function to remove noise in cruise altitude.
- Add a `pycontrails.datalib.spire.identify_flights` function to identify unique flight trajectories from ADS-B messages.
- Add a `pycontrails.datalib.spire.validate_trajectory` function to check the validity of the identified trajectories from ADS-B messages.
- Add a `FlightPhase` integer Enum in the `flight` module. This includes a new `level_flight` flight phase.

#### 14.25.2 Internals

- Add unit tests providing examples to identify unique flights.
- Rename `flight._dt_waypoints` -> `flight.segment_duration`.
- Move `jet.rate_of_climb_descent` -> `flight.segment_rocd`.
- Move `jet.identify_phase_of_flight` -> `flight.segment_phase`.
- Update `FlightPhase` to be a dictionary enumeration of flight phases.
- Add references to [traffic library](#).



## 14.26 v0.41.0

Improve polygon algorithms.

### 14.26.1 Features

- Rewrite the `polygon` module to run computation with `opencv` in place of `scikit-image` for finding contours. This change improves the algorithm runtime and fixes some previous unstable behavior in finding nested contours. For an introduction to the methodology, see the [OpenCV contour tutorial](#).

### 14.26.2 Breaking changes

- Completely rewrite the `polygon` module. Replace the “main” public function `polygon.find_contours_to_depth` with `polygon.find_multipolygon`. Replace the `polygon.contour_to_lat_lon` function with `polygon.multipolygon_to_geojson`. Return shapely objects when convenient to do so.
- Convert continuous data to binary for polygon computation.
- Remove parameters `min_area_to_iterate` and `depth` in the `MetdataArray.to_polygon_feature` method. The `depth` parameter has been replaced by the boolean `interiors` parameter. Add a `properties` parameter for adding properties to the `Polygon` and `MultiPolygon` features. The `max_area` and `epsilon` parameters are now expressed in terms of latitude-longitude degrees.

### 14.26.3 Internals

- Add `opencv-python-headless>=4.5` as an optional “vis” dependency. Some flavor of `opencv` is required for the updated polygon algorithms.

## 14.27 v0.40.1

### 14.27.1 Fixes

- Use `oldest-supported-numpy` for building pycontrails wheels. This allows pycontrails to be compatible with environments that use old versions of numpy. The `pycontrails v0.40.0` wheels are not compatible with numpy 1.22.

## 14.28 v0.40.0

Support scipy 1.10, improve interpolation performance, and fix many windows issues.

### 14.28.1 Features

- Improve interpolation performance by cythonizing linear interpolation. This extends the approach taken in [scipy 1.10](#). The pycontrails *cython routines* allow for both float64 and float32 grids via cython fused types (the current scipy implementation assumes float64). In addition, interpolation up to dimension 4 is supported (the scipy implementation supports dimension 1 and 2).
- Officially support [scipy 1.10](#).
- Officially test on windows in the GitHub Actions CI.
- Build custom wheels for python 3.9, 3.10, and 3.11 for the following platforms:
  - Linux (x86\_64)
  - macOS (arm64 and x86\_64)
  - Windows (x86\_64)

### 14.28.2 Breaking changes

- Change `MetDataset` and `MetdataArray` conventions: underlying dimension coordinates are automatically promoted to float64.
- Change how datetime arrays are converted to floating values for interpolation. The new approach introduces small differences compared with the previous implementation. These differences are significant enough to see relative differences in CoCiP predictions on the order of 1e-4.

### 14.28.3 Fixes

- Unit tests no longer raise errors when the `pycontrails-bada` package is not installed. Instead, some tests are skipped.
- Fix many numpy casting issues encountered on windows.
- Fix temp file issues encountered on windows.
- Officially support changes in `xarray 2023.04` and `pandas 2.0`.

### 14.28.4 Internals

- Make the `interpolation` module more aligned with [scipy 1.10 enhancements](#) to the `RegularGridInterpolator`. In particular, grid coordinates now must be float64.
- Use `cibuildwheel` to build wheels for Linux, macOS (arm64 and x86\_64), and Windows on *release* in Github Actions. Allow this workflow to be triggered manually to test the release process without actually publishing to PyPI.
- Simplify interpolation with pre-computed indices (invoked with the `model` parameter `interpolation_use_indices`) via a `RGIArtifacts` interface.
- Overhaul much of the interpolation module to improve performance.
- Slight performance enhancements to the `met` module.

## 14.29 v0.39.6

### 14.29.1 Features

- Add `geo.azimuth` and `geo.segment_azimuth` functions to calculate the azimuth between coordinates. Azimuth is the angle between coordinates relative to true north on the interval  $[0, 360)$ .

### 14.29.2 Fixes

- Fix edge case in polygon algorithm by utilizing the `fully_connected` parameter in `measure.find_contours`. This update leads to slight changes in interior contours in some cases.
- Fix hard-coded POSIX path in `confstest.py` for windows compatibility.
- Address `PermissionError` raised by `shutil.copy` when the destination file is open in another thread. The copy is skipped and a warning is logged.
- Fix some unit tests in `test_vector.py` and `test_ecmwf.py` for windows compatibility. There are still a few tests that fail on windows (unrelated to changes in this release) that will be fixed in v0.40.0.
- Allow `cachestore=None` to skip caching in ERA5, HRES, and GFS interfaces. Previously a default `DiskCacheStore` was created even when `cachestore=None`. By default, caching is still enabled.

### 14.29.3 Internals

- Clean up `geo` module docstrings.
- Add Wikipedia reference for [Azimuth](#).
- Convert `MetBase._load` to from a class method to a function.

## 14.30 v0.39.5

### 14.30.1 Fixes

- Fix `docs/examples/CoCiP.ipynb` example demonstrating aircraft performance integration
- Fix unit test caused by breaking change in [pyproj 3.5.0](#)

### 14.30.2 Internals

- Add additional Zenodo metadata
- Execute notebook examples in [Docs Action](#)

## 14.31 v0.39.4

### 14.31.1 Internals

- Add additional Zenodo metadata
- Add `Doc / Notebook test Action` to run notebook test (`make nb-test`) and doctests (`make doctest`) on pull requests.
- Update `Docs Action` to use python 3.11.

## 14.32 v0.39.3

### 14.32.1 Fixes

- Update links in the *README*.
- Update the *release guide* to include a checklist of steps to follow when cutting a release.

## 14.33 v0.39.2

### 14.33.1 Fixes

- Fix links in documentation website.
- Deploy build to `PyPI` (in addition to `Test PyPI`) on release.

## 14.34 v0.39.1

### 14.34.1 Features

- Use `setuptools_scm` to manage the `pycontrails` version.

## 14.35 v0.39.0

### 14.35.1 Features

- Add Apache-2 LICENSE and NOTICE files (#21)
- Add `CONTRIBUTING` document
- Update documentation website `py.contrails.org`. Includes `install` and `develop` guides, update citations and many other small improvements (#19).
- Initiate the `Github Discussion` forum (#22).

## 14.35.2 Fixes

- Fix erroneous docstrings in `emissions.py` (#25)

## 14.35.3 Internals

- Add Github action to push to pypi on tag (#3)
- Replace `flake8` with `ruff` linter
- Add `nb-clean` to pre-commit hooks for example notebooks
- Add `doc8` rst linter and pre-commit hook

## 14.36 v0.38.0

### 14.36.1 Breaking changes

- Change default value of `epsilon` parameter in method `MetdataArray.to_polygon_feature` from 0.15 to 0.0.
- Change the polygon simplification algorithm. The new implementation uses `shapely.buffer` and doesn't try to preserve the topology of the simplified polygon. This change may result in slightly different polygon geometries.

### 14.36.2 Internals

- Add `depth` parameter to `MetdataArray.to_polygon_feature` to control the depth of the contour searching.
- Add experimental `convex_hull` parameter to `MetdataArray.to_polygon_feature` to control whether to take the convex hull of each contour.
- Warn if `iso_value` is not specified in `MetdataArray.to_polygon_feature`.

### 14.36.3 Fixes

- Consolidate three redundant implementations of standardizing variables into a single `met.standardize_variables`.
- Ensure simplified polygons returned by `MetdataArray.to_polygon_feature` are disjoint. While non-disjoint polygons don't violate the GeoJSON spec, they can cause problems in some applications.

## 14.37 v0.37.3

### 14.37.1 Internals

- Add citations for ISA calculations
- Abstract functionality to convert a Dataset or DataArray to longitude coordinates `[-180, 180)` into `core.met.shift_longitude`. Add tests for method.
- Add auto-formatting checks to CI testing

## 14.38 v0.37.2

ACCF integration updates

### 14.38.1 Fixes

- Fixes ability to evaluate ACCF model over a `MetDataset` grid by passing in tuple of (dims, data) when assigning data
- Fixes minor issues with ACCF configuration and allows more configuration options
- Updates example ACCF notebook with example of how to set configuration options when evaluating ACCFs over a grid

## 14.39 v0.37.1

### 14.39.1 Features

- Include “rhi” and “iwc” variables in `CocipGrid` verbose outputs.

## 14.40 v0.37.0

### 14.40.1 Breaking changes

- Update CoCiP unit test static results for breaking changes in tau cirrus calculation. The relative difference in pinned energy forcing values is less than 0.001%.

### 14.40.2 Fixes

- Fix geopotential height gradient calculation in the `tau_cirrus` module. When calculating finite differences along the vertical axis, the tau cirrus model previously divided the top and bottom differences by 2. To numerically approximate the derivative at the top and bottom levels, these differences should have actually been divided by 1. The calculation now uses `np.gradient` to calculate the derivative along the vertical axis, which handles this correctly.
- Make tau cirrus calculation slightly more performant.
- Include a warning in the suspect `IFS._calc_geopotential` implementation.

### 14.40.3 Internals

- Remove `_deprecated.tau_cirrus_alt`. This function is now the default `tau_cirrus` calculation. The original `tau_cirrus` calculation is still available in the `_deprecated` module.
- Run `flake8` over test modules.

## BIBLIOGRAPHY

- [1] A Celikel and F Jelinek. Forecasting civil aviation fuel burn and emissions in Europe. *EUROCONTROL Experimental Centre*, 2001.
- [2] D.S. Lee, D.W. Fahey, A. Skowron, M.R. Allen, U. Burkhardt, Q. Chen, S.J. Doherty, S. Freeman, P.M. Forster, J. Fuglestedt, A. Gettelman, R.R. De León, L.L. Lim, M.T. Lund, R.J. Millar, B. Owen, J.E. Penner, G. Pitari, M.J. Prather, R. Sausen, and L.J. Wilcox. The contribution of global aviation to anthropogenic climate forcing for 2000 to 2018. *Atmospheric Environment*, 244:117834, January 2021. doi:10.1016/j.atmosenv.2020.117834.
- [3] M. E. J. Stettler, S. Eastham, and S. R. H. Barrett. Air quality and public health impacts of UK airports. Part I: Emissions. *Atmospheric Environment*, 45(31):5415–5424, October 2011. doi:10.1016/j.atmosenv.2011.07.012.
- [4] J. T. Wilkerson, M. Z. Jacobson, A. Malwitz, S. Balasubramanian, R. Wayson, G. Fleming, A. D. Naiman, and S. K. Lele. Analysis of emission data from global commercial aviation: 2004 and 2006. *Atmospheric Chemistry and Physics*, 10(13):6391–6408, July 2010. doi:10.5194/acp-10-6391-2010.
- [5] Roger Teoh, Ulrich Schumann, Christiane Voigt, Tobias Schripp, Marc Shapiro, Zebediah Engberg, Jarlath Molloly, George Koudis, and Marc E. J. Stettler. Targeted Use of Sustainable Aviation Fuel to Maximize Climate Benefits. *Environmental Science & Technology*, November 2022. doi:10.1021/acs.est.2c05781.
- [6] Tobias Schripp, Bruce E. Anderson, Uwe Bauder, Bastian Rauch, Joel C. Corbin, Greg J. Smallwood, Prem Lobo, Ewan C. Crosbie, Michael A. Shook, Richard C. Miake-Lye, Zhenhong Yu, Andrew Freedman, Philip D. Whitefield, Claire E. Robinson, Steven L. Achterberg, Markus Köhler, Patrick Oßwald, Tobias Grein, Daniel Sauer, Christiane Voigt, Hans Schlager, and Patrick LeClercq. Aircraft engine particulate matter emissions from sustainable aviation fuels: Results from ground-based measurements during the NASA/DLR campaign ECLIF2/ND-MAX. *Fuel*, 325:124764, October 2022. doi:10.1016/j.fuel.2022.124764.
- [7] M. Anwar H. Khan, Joel Brierley, Kieran N. Tait, Steve Bullock, Dudley E. Shallcross, and Mark H. Lowenberg. The Emissions of Water Vapour and NO<sub>x</sub> from Modelled Hydrogen-Fuelled Aircraft and the Impact of NO<sub>x</sub> Reduction on Climate Compared with Kerosene-Fuelled Aircraft. *Atmosphere*, 13(10):1660, October 2022. doi:10.3390/atmos13101660.
- [8] Robert W. Carver and Alex Merose. ARCO-ERA5: An Analysis-Ready Cloud-Optimized Reanalysis Dataset. In *103rd AMS Annual Meeting*. AMS, January 2023.
- [9] Luke Kulik. *Satellite-Based Detection of Contrails Using Deep Learning*. PhD thesis, Massachusetts Institute of Technology, Cambridge, MA, USA, September 2019.
- [10] SEVIRI RGB Cal Module - part II. <https://resources.eumetrain.org/data/4/410/navmenu.php?tab=5&page=2.0.0>.
- [11] Ulrich Schumann. On conditions for contrail formation from aircraft exhausts (Über Bedingungen zur Bildung von Kondensstreifen aus Flugzeugabgasen). *Meteorologische Zeitschrift*, 5(1):4–23, March 1996. doi:10.1127/metz/5/1996/4.
- [12] Michael Ponater. Contrails in a comprehensive global climate model: Parameterization and radiative forcing results. *Journal of Geophysical Research*, 107(D13):4164, 2002. doi:10.1029/2001JD000429.

- [13] U. Schumann. A contrail cirrus prediction model. *Geoscientific Model Development*, 5(3):543–580, May 2012. doi:10.5194/gmd-5-543-2012.
- [14] U. Schumann, B. Mayer, K. Graf, and H. Mannstein. A Parametric Radiative Forcing Model for Contrail Cirrus. *Journal of Applied Meteorology and Climatology*, 51(7):1391–1406, July 2012. doi:10.1175/JAMC-D-11-0242.1.
- [15] Roger Teoh, Ulrich Schumann, Edward Gryspeerd, Marc Shapiro, Jarlath Molloy, George Koudis, Christiane Voigt, and Marc E. J. Stettler. Aviation contrail climate effects in the North Atlantic from 2016 to 2021. *Atmospheric Chemistry and Physics*, 22(16):10919–10935, August 2022. doi:10.5194/acp-22-10919-2022.
- [16] U. Schumann and P. Wendling. Determination of Contrails from Satellite Data and Observational Results. In U. Schumann, editor, *Air Traffic and the Environment — Background, Tendencies and Potential Global Atmospheric Effects*, Lecture Notes in Engineering, 138–153. Berlin, Heidelberg, 1990. Springer. doi:10.1007/978-3-642-51686-3\_9.
- [17] Ulrich Schumann. A contrail cirrus prediction tool. In Robert Sausen, Peter F. J. van Velthoven, Claus Brüning, and Anja Blum, editors, *Proceedings of the 2nd International Conference on Transport, Atmosphere and Climate (TAC-2)*, volume 2010–10, 69–74. Aachen, Germany and Maastricht, The Netherlands, 2010. DLR.
- [18] C. Voigt, U. Schumann, T. Jurkat, D. Schäuble, H. Schlager, A. Petzold, J.-F. Gayet, M. Krämer, J. Schneider, S. Borrmann, J. Schmale, P. Jessberger, T. Hamburger, M. Lichtenstern, M. Scheibe, C. Gourbeyre, J. Meyer, M. Kübbeler, W. Frey, H. Kalesse, T. Butler, M. G. Lawrence, F. Holzäpfel, F. Arnold, M. Wendisch, A. Döpelheuer, K. Gottschaldt, R. Baumann, M. Zöger, I. Sölch, M. Rautenhaus, and A. Dörnbrack. In-situ observations of young contrails – overview and selected results from the CONCERT campaign. *Atmospheric Chemistry and Physics*, 10(18):9039–9056, September 2010. doi:10.5194/acp-10-9039-2010.
- [19] Ulrich Schumann, Kaspar Graf, and Hermann Mannstein. Potential to reduce the climate impact of aviation by flight level changes. In *3rd AIAA Atmospheric Space Environments Conference*. Honolulu, Hawaii, June 2011. American Institute of Aeronautics and Astronautics. doi:10.2514/6.2011-3376.
- [20] Ulrich Schumann, Kaspar Graf, Hermann Mannstein, and Bernhard Mayer. Contrails: Visible Aviation Induced Climate Impact. In Ulrich Schumann, editor, *Atmospheric Physics*, pages 239–257. Springer Berlin Heidelberg, Berlin, Heidelberg, 2012. doi:10.1007/978-3-642-30183-4\_15.
- [21] U. Schumann, B. Mayer, K. Gierens, S. Unterstrasser, P. Jessberger, A. Petzold, C. Voigt, and J.-F. Gayet. Effective Radius of Ice Particles in Cirrus and Contrails. *Journal of the Atmospheric Sciences*, 68(2):300–321, February 2011. doi:10.1175/2010JAS3562.1.
- [22] U. Schumann, J. E. Penner, Yibin Chen, Cheng Zhou, and K. Graf. Dehydration effects from contrails in a coupled contrail–climate model. *Atmospheric Chemistry and Physics*, 15(19):11179–11199, October 2015. doi:10.5194/acp-15-11179-2015.
- [23] Roger Teoh, Ulrich Schumann, Arnab Majumdar, and Marc E. J. Stettler. Mitigating the Climate Forcing of Aircraft Contrails by Small-Scale Diversions and Technology Adoption. *Environmental Science & Technology*, 54(5):2941–2950, March 2020. doi:10.1021/acs.est.9b05608.
- [24] U. Schumann, L. Bugliaro, A. Dörnbrack, R. Baumann, and C. Voigt. Aviation Contrail Cirrus and Radiative Forcing Over Europe During 6 Months of COVID-19. *Geophysical Research Letters*, 48(8):e2021GL092771, 2021. doi:10.1029/2021GL092771.
- [25] Ulrich Schumann, Ian Poll, Roger Teoh, Rainer Koelle, Enrico Spinielli, Jarlath Molloy, George S. Koudis, Robert Baumann, Luca Bugliaro, Marc Stettler, and Christiane Voigt. Air traffic and contrail changes over Europe during COVID-19: a model study. *Atmospheric Chemistry and Physics*, 21(10):7429–7450, May 2021. doi:10.5194/acp-21-7429-2021.
- [26] Feijia Yin, Volker Grewe, Federica Castino, Pratik Rao, Sigrun Matthes, Katrin Dahlmann, Simone Dietmüller, Christine Frömming, Hiroshi Yamashita, Patrick Peter, Emma Klingaman, Keith P. Shine, Benjamin Lührs, and Florian Linke. Predicting the climate impact of aviation for en-route emissions: the algorithmic climate change function submodel ACCF 1.0 of EMAC 2.53. *Geoscientific Model Development*, 16(11):3313–3334, June 2023. doi:10.5194/gmd-16-3313-2023.



- [27] Ulrich Schumann and Kaspar Graf. Aviation-induced cirrus and radiation changes at diurnal timescales. *Journal of Geophysical Research: Atmospheres*, 118(5):2404–2421, March 2013. doi:10.1002/jgrd.50184.
- [28] Simon Unterstrasser. Properties of young contrails &ndash; a parametrisation based on large-eddy simulations. *Atmospheric Chemistry and Physics*, 16(4):2059–2082, February 2016. doi:10.5194/acp-16-2059-2016.
- [29] Bernd Kärcher. Formation and radiative forcing of contrail cirrus. *Nature Communications*, December 2018. doi:10.1038/s41467-018-04068-0.
- [30] T. Bräuer, C. Voigt, D. Sauer, S. Kaufmann, V. Hahn, M. Scheibe, H. Schlager, G. S. Diskin, J. B. Nowak, J. P. DiGangi, F. Huber, R. H. Moore, and B. E. Anderson. Airborne Measurements of Contrail Ice Properties—Dependence on Temperature and Humidity. *Geophysical Research Letters*, April 2021. doi:10.1029/2020GL092166.
- [31] P. Spichtinger and K. M. Gierens. Modelling of cirrus clouds – Part 1a: Model description and validation. *Atmospheric Chemistry and Physics*, 9(2):685–706, January 2009. doi:10.5194/acp-9-685-2009.
- [32] Ulrich Schumann, Robert Baumann, Darrel Baumgardner, Sarah T. Bedka, David P. Duda, Volker Freudenthaler, Jean-Francois Gayet, Andrew J. Heymsfield, Patrick Minnis, Markus Quante, Ehrhard Raschke, Hans Schlager, Margarita Vázquez-Navarro, Christiane Voigt, and Zhien Wang. Properties of individual contrails: a compilation of observations and some comparisons. *Atmospheric Chemistry and Physics*, 17(1):403–438, January 2017. doi:10.5194/acp-17-403-2017.
- [33] Frank Holzäpfel. Probabilistic Two-Phase Wake Vortex Decay and Transport Model. *Journal of Aircraft*, 40(2):323–331, March 2003. doi:10.2514/2.3096.
- [34] U. Schumann and T. Gerz. Turbulent Mixing in Stably Stratified Shear Flows. *Journal of Applied Meteorology and Climatology*, 34(1):33–48, January 1995. doi:10.1175/1520-0450-34.1.33.
- [35] Simone Dietmüller. Dlr-pa/climaccf: Dataset update for GMDD. Zenodo, September 2022. doi:10.5281/zenodo.7074582.
- [36] Simone Dietmüller, Sigrun Matthes, Katrin Dahlmann, Hiroshi Yamashita, Abolfazl Simorgh, Manuel Soler, Florian Linke, Benjamin Lührs, Maximilian Mendiguchia Meuser, Christian Weder, Volker Grewe, Feijia Yin, and Federica Castino. A python library for computing individual and merged non-CO<sub>2</sub> algorithmic climate change functions: CLIMaCCF V1.0. Preprint, Atmospheric sciences, October 2022. doi:10.5194/gmd-2022-203.
- [37] D.I.A. Poll and U. Schumann. An estimation method for the fuel burn and other performance characteristics of civil transport aircraft in the cruise. Part 1 fundamental quantities and governing relations for a general atmosphere. *The Aeronautical Journal*, 125(1284):257–295, February 2021. doi:10.1017/aer.2020.62.
- [38] D.I.A. Poll and U. Schumann. An estimation method for the fuel burn and other performance characteristics of civil transport aircraft during cruise: part 2, determining the aircraft's characteristic parameters. *The Aeronautical Journal*, 125(1284):296–340, February 2021. doi:10.1017/aer.2020.124.
- [39] Marc E. J. Stettler, Adam M. Boies, Andreas Petzold, and Steven R. H. Barrett. Global Civil Aviation Black Carbon Emissions. *Environmental Science & Technology*, 47(18):10397–10404, September 2013. doi:10.1021/es401356v.
- [40] Joseph P. Abrahamson, Joseph Zelina, M. Gurhan Andac, and Randy L. Vander Wal. Predictive Model Development for Aviation Black Carbon Mass Emissions from Alternative and Conventional Fuels at Ground and Cruise. *Environmental Science & Technology*, 50(21):12048–12055, November 2016. doi:10.1021/acs.est.6b03749.
- [41] A Dopelheuer and M Lecht. Influence of engine performance on emission characteristics. *Gas Turbine Engine Combustion, Emissions and Alternative Fuels*, pages 12, 1998.
- [42] Roger Teoh, Marc E.J. Stettler, Arnab Majumdar, Ulrich Schumann, Brian Graves, and Adam M. Boies. A methodology to relate black carbon particle number and mass emissions. *Journal of Aerosol Science*, 132:44–59, June 2019. doi:10.1016/j.jaerosci.2019.03.006.

- [43] Kihong Park, David B. Kittelson, Michael R. Zachariah, and Peter H. McMurry. Measurement of Inherent Material Density of Nanoparticle Agglomerates. *Journal of Nanoparticle Research*, 6(2):267–272, June 2004. doi:10.1023/B:NANO.0000034657.71309.e6.
- [44] Ramin Dastanpour and Steven N. Rogak. Observations of a Correlation Between Primary Particle and Aggregate Size for Soot Particles. *Aerosol Science and Technology*, 48(10):1043–1049, October 2014. doi:10.1080/02786826.2014.955565.
- [45] Benjamin T. Brem, Lukas Durdina, Frithjof Siegerist, Peter Beyerle, Kevin Bruderer, Theo Rindlisbacher, Sara Rocci-Denis, M. Gurhan Andac, Joseph Zelina, Olivier Penanhoat, and Jing Wang. Effects of Fuel Aromatic Content on Nonvolatile Particulate Emissions of an In-Production Aircraft Gas Turbine. *Environmental Science & Technology*, 49(22):13149–13157, November 2015. doi:10.1021/acs.est.5b04167.
- [46] Doug DuBois and Gerald C. Paynter. "Fuel Flow Method2" for Estimating Aircraft Emissions. *SAE Transactions*, 115:1–14, 2006. arXiv:44657657.
- [47] Zhian Sun and Lawrie Rikus. Parametrization of effective sizes of cirrus-cloud particles and its verification against observations: RADIATIVE FOR CING AND CLIMATE SENSITIVITY. *Quarterly Journal of the Royal Meteorological Society*, 125(560):3037–3055, October 1999. doi:10.1002/qj.49712556012.
- [48] Philipp Reutter, Patrick Neis, Susanne Rohs, and Bastien Sauvage. Ice supersaturated regions: properties and validation of ERA-Interim reanalysis with IAGOS in situ water vapour measurements. *Atmospheric Chemistry and Physics*, 20(2):787–804, January 2020. doi:10.5194/acp-20-787-2020.
- [49] F. Anthony Eckel and Michael K. Walters. Calibrated Probabilistic Quantitative Precipitation Forecasts Based on theMRF Ensemble. *Weather and Forecasting*, 13(4):1132–1147, December 1998. doi:10.1175/1520-0434(1998)013<1132:CPQPF>2.0.CO;2.
- [50] Wikipedia contributors. International Standard Atmosphere. [https://en.wikipedia.org/w/index.php?title=International\\_Standard\\_Atr](https://en.wikipedia.org/w/index.php?title=International_Standard_Atr), 2023.
- [51] UO Solar Radiation Monitoring Laboratory. UO SRML: Solar radiation basics. <http://solardat.uoregon.edu/SolarRadiationBasics.html>, 2022.
- [52] G. W. Paltridge, C. Martin R. Platt, and C. M. R. Platt. *Radiative Processes in Meteorology and Climatology*. Elsevier Scientific Publishing Company, 1976. ISBN 978-0-444-41444-1.
- [53] D. Sonntag. Advancements in the field of hygrometry. *Meteorologische Zeitschrift*, 3(2):51–66, May 1994. doi:10.1127/metz/3/1994/51.
- [54] Nicholas Cumpsty and Andrew Heyes. *Jet Propulsion*. Cambridge University Press, July 2015. ISBN 978-1-107-51122-4.
- [55] D. K. Wasiuk, M. H. Lowenberg, and D. E. Shallcross. An aircraft performance model implementation for the estimation of global and regional commercial aviation fuel burn and emissions. *Transportation Research Part D: Transport and Environment*, 35:142–159, March 2015. doi:10.1016/j.trd.2014.11.022.
- [56] Eurocontrol. USER MANUAL FOR THE BASE OF Aircraft DATA (BADA) REVISION 3.8. April 2010. doi:10.1163/1570-6664\_iyb\_SIM\_org\_39214.
- [57] Wikipedia contributors. Azimuth. <https://en.wikipedia.org/w/index.php?title=Azimuth&oldid=1131548993>, 2023.
- [58] Wikipedia contributors. Solar zenith angle. [https://en.wikipedia.org/w/index.php?title=Solar\\_zenith\\_angle&oldid=1141660912](https://en.wikipedia.org/w/index.php?title=Solar_zenith_angle&oldid=1141660912), 2023.
- [59] Calculate distance and bearing between two Latitude/Longitude points using haversine formula in JavaScript. <https://www.movable-type.co.uk/scripts/latlong.html>.
- [60] NOAA. Solar Calculation Details. <https://gml.noaa.gov/grad/solcalc/calcdetails.html>.
- [61] John A. Duffie and William A. Beckman. *Solar Engineering of Thermal Processes*. Wiley, 1991. ISBN 978-0-471-51056-7.

- [62] Wikipedia contributors. Barometric formula. [https://en.wikipedia.org/w/index.php?title=Barometric\\_formula&oldid=1144039200](https://en.wikipedia.org/w/index.php?title=Barometric_formula&oldid=1144039200), 2023.
- [63] David Megginson. Open-data downloads for OurAirports. April 2023.
- [64] Rémi Chevallier, Marc Shapiro, Zebediah Engberg, Manuel Soler, and Daniel Delahaye. Linear Contrails Detection, Tracking and Matching with Aircraft Using Geostationary Satellite and Air Traffic Data. *Aerospace*, 10(7):578, July 2023. doi:10.3390/aerospace10070578.
- [65] Alejandra Martín Frías, relax FLIGHTKEYS GmbH, and Manuel Soler. Enhancing environmental sustainability in aviation: an implementation of contrail mitigation strategies in commercial flight dispatching. In *ATM Seminar*. 2023.
- [66] Scott Geraedts, Erica Brand, Thomas R. Dean, Sebastian Eastham, Carl Elkin, Zebediah Engberg, Ulrike Hager, Ian Langmore, Kevin McCloskey, Joe Yue-Hei Ng, John C. Platt, Tharun Sankar, Aaron Sarna, Marc Shapiro, and Nita Goyal. A scalable system to measure contrail formation on a per-flight basis. August 2023. [arXiv:2308.02707](https://arxiv.org/abs/2308.02707).



## PYTHON MODULE INDEX

### p

- pycontrails.core.aircraft\_performance, 342
- pycontrails.core.airports, 431
- pycontrails.core.cache, 433
- pycontrails.core.coordinates, 442
- pycontrails.core.datalib, 444
- pycontrails.core.fleet, 450
- pycontrails.core.flight, 457
- pycontrails.core.fuel, 474
- pycontrails.core.interpolation, 477
- pycontrails.core.met, 480
- pycontrails.core.met\_var, 499
- pycontrails.core.models, 500
- pycontrails.core.polygon, 507
- pycontrails.core.vector, 509
- pycontrails.datalib.ecmwf.arco\_era5, 243
- pycontrails.datalib.ecmwf.era5\_model\_level, 221
- pycontrails.datalib.ecmwf.hres\_model\_level, 230
- pycontrails.datalib.ecmwf.model\_levels, 234
- pycontrails.datalib.ecmwf.variables, 238
- pycontrails.datalib.gfs.variables, 243
- pycontrails.datalib.goes, 247
- pycontrails.ext.bada.bada\_model, 527
- pycontrails.models.cocip.contrail\_properties, 287
- pycontrails.models.cocip.radiative\_forcing, 304
- pycontrails.models.cocip.wake\_vortex, 314
- pycontrails.models.cocip.wind\_shear, 320
- pycontrails.models.emissions.black\_carbon, 365
- pycontrails.models.emissions.ffm2, 372
- pycontrails.models.humidity\_scaling, 376
- pycontrails.models.issr, 260
- pycontrails.models.pcc, 269
- pycontrails.models.pcr, 267
- pycontrails.models.sac, 263
- pycontrails.models.tau\_cirrus, 374
- pycontrails.physics.constants, 390
- pycontrails.physics.geo, 407
- pycontrails.physics.jet, 398
- pycontrails.physics.thermo, 393
- pycontrails.physics.units, 416
- pycontrails.utils.iteration, 524
- pycontrails.utils.json, 525
- pycontrails.utils.temp, 525
- pycontrails.utils.types, 522



## Symbols

- `__init__` () (*pycontrails.DiskCacheStore* method), 422
  - `__init__` () (*pycontrails.Fleet* method), 201
  - `__init__` () (*pycontrails.Flight* method), 187
  - `__init__` () (*pycontrails.FlightPhase* method), 210
  - `__init__` () (*pycontrails.Fuel* method), 211
  - `__init__` () (*pycontrails.GPCCacheStore* method), 426
  - `__init__` () (*pycontrails.GeoVectorDataset* method), 178
  - `__init__` () (*pycontrails.HydrogenFuel* method), 215
  - `__init__` () (*pycontrails.JetA* method), 212
  - `__init__` () (*pycontrails.MetdataArray* method), 161
  - `__init__` () (*pycontrails.MetDataset* method), 154
  - `__init__` () (*pycontrails.Model* method), 254
  - `__init__` () (*pycontrails.ModelParams* method), 258
  - `__init__` () (*pycontrails.SAFBlend* method), 214
  - `__init__` () (*pycontrails.VectorDataset* method), 170
  - `__init__` () (*pycontrails.datalib.ecmwf.ERA5* method), 218
  - `__init__` () (*pycontrails.datalib.ecmwf.HRES* method), 226
  - `__init__` () (*pycontrails.datalib.ecmwf.IFS* method), 235
  - `__init__` () (*pycontrails.datalib.gfs.GFSForecast* method), 239
  - `__init__` () (*pycontrails.ext.bada.BADA3* method), 538
  - `__init__` () (*pycontrails.ext.bada.BADA4* method), 543
  - `__init__` () (*pycontrails.ext.bada.BADAFlight* method), 528
  - `__init__` () (*pycontrails.ext.bada.BADAFlightParams* method), 532
  - `__init__` () (*pycontrails.ext.bada.BADAGrid* method), 534
  - `__init__` () (*pycontrails.ext.bada.BADAGridParams* method), 536
  - `__init__` () (*pycontrails.models.accf.ACCF* method), 335
  - `__init__` () (*pycontrails.models.accf.ACCFParams* method), 338
  - `__init__` () (*pycontrails.models.cocip.Cocip* method), 275
  - `__init__` () (*pycontrails.models.cocip.CocipParams* method), 281
  - `__init__` () (*pycontrails.models.cocipgrid.CocipGrid* method), 322
  - `__init__` () (*pycontrails.models.cocipgrid.CocipGridParams* method), 330
  - `__init__` () (*pycontrails.models.emissions.Emissions* method), 363
  - `__init__` () (*pycontrails.models.ps\_model.PSAircraftEngineParams* method), 357
  - `__init__` () (*pycontrails.models.ps\_model.PSFlight* method), 350
  - `__init__` () (*pycontrails.models.ps\_model.PSFlightParams* method), 349
  - `__init__` () (*pycontrails.models.ps\_model.PSGrid* method), 353
- ## A
- `A_mu` (*pycontrails.models.cocip.radiative\_forcing.RFCConstants* attribute), 306
  - `absolute_zero` (in module *pycontrails.physics.constants*), 392
  - `acceleration()` (in module *pycontrails.physics.jet*), 398
  - `ACCF` (class in *pycontrails.models.accf*), 335
  - `accf_v` (*pycontrails.models.accf.ACCFParams* attribute), 340
  - `ACCFParams` (class in *pycontrails.models.accf*), 338
  - `advect_latitude()` (in module *pycontrails.physics.geo*), 407
  - `advect_level()` (in module *pycontrails.physics.geo*), 408
  - `advect_longitude()` (in module *pycontrails.physics.geo*), 408
  - `air_pressure` (*pycontrails.core.vector.GeoVectorDataset* property), 510
  - `air_pressure` (*pycontrails.GeoVectorDataset* property), 180
  - `air_to_fuel_ratio()` (in module *pycontrails.physics.jet*), 399
  - `air_to_fuel_ratio_imfox()` (in module *pycontrails.models.emissions.black\_carbon*), 365

- aircraft\_engine\_dataframe (pycontrails.ext.bada.BADA3 attribute), 540
  - aircraft\_engine\_dataframe (pycontrails.ext.bada.BADA4 attribute), 544
  - aircraft\_engine\_options (pycontrails.ext.bada.BADA4 attribute), 544
  - aircraft\_engine\_params (pycontrails.models.ps\_model.PSFlight attribute), 351
  - aircraft\_mass (pycontrails.core.aircraft\_performance.AircraftPerformanceData attribute), 345
  - aircraft\_mass (pycontrails.core.aircraft\_performance.AircraftPerformanceGridData attribute), 347
  - aircraft\_mass (pycontrails.models.cocipgrid.CocipGridParams attribute), 333
  - aircraft\_param\_dict (pycontrails.ext.bada.BADA3 attribute), 540
  - aircraft\_param\_dict (pycontrails.ext.bada.BADA4 attribute), 544
  - aircraft\_performance (pycontrails.models.cocipgrid.CocipGridParams attribute), 333
  - aircraft\_type (pycontrails.core.aircraft\_performance.AircraftPerformanceData attribute), 347
  - aircraft\_type (pycontrails.models.cocipgrid.CocipGridParams attribute), 333
  - aircraft\_type (pycontrails.models.ps\_model.PSAircraftEngineParams attribute), 359
  - aircraft\_weight() (in module pycontrails.physics.jet), 399
  - AircraftPerformance (class in pycontrails.core.aircraft\_performance), 342
  - AircraftPerformanceData (class in pycontrails.core.aircraft\_performance), 345
  - AircraftPerformanceGrid (class in pycontrails.core.aircraft\_performance), 346
  - AircraftPerformanceGridData (class in pycontrails.core.aircraft\_performance), 346
  - AircraftPerformanceGridParams (class in pycontrails.core.aircraft\_performance), 346
  - AircraftPerformanceParams (class in pycontrails.core.aircraft\_performance), 347
  - albedo() (in module pycontrails.models.cocip.radiative\_forcing), 307
  - allow\_clear (pycontrails.core.cache.CacheStore attribute), 433
  - allow\_clear (pycontrails.core.cache.DiskCacheStore attribute), 435
  - allow\_clear (pycontrails.DiskCacheStore attribute), 423
  - altitude (pycontrails.core.vector.GeoVectorDataset property), 510
  - altitude (pycontrails.GeoVectorDataset property), 180
  - altitude\_ft (pycontrails.core.vector.GeoVectorDataset property), 510
  - altitude\_ft (pycontrails.GeoVectorDataset property), 180
  - amass\_mlw (pycontrails.models.ps\_model.PSAircraftEngineParams attribute), 359
  - amass\_mpl (pycontrails.models.ps\_model.PSAircraftEngineParams attribute), 359
  - amass\_mzfw (pycontrails.models.ps\_model.PSAircraftEngineParams attribute), 359
  - amass\_oew (pycontrails.models.ps\_model.PSAircraftEngineParams attribute), 359
  - amip (pycontrails.core.met\_var.MetVariable attribute), 499
  - apply\_nan\_mask\_to\_arraylike() (in module pycontrails.utils.types), 523
  - ARCOERA5 (class in pycontrails.datalib.ecmwf.arco\_era5), 244
  - ArrayLike (class in pycontrails.utils.types), 523
  - ArrayLike (class in pycontrails.utils.types), 523
  - ArrayScalarLike (class in pycontrails.utils.types), 523
  - as\_dict() (pycontrails.core.models.ModelParams method), 504
  - as\_dict() (pycontrails.ModelParams method), 258
  - assumed\_aircraft\_engine\_type\_bada4() (pycontrails.ext.bada.BADA4 method), 544
  - AttrDict (class in pycontrails.core.vector), 509
  - attrs (pycontrails.core.met.MetBase property), 481
  - attrs (pycontrails.core.met\_var.MetVariable property), 499
  - attrs (pycontrails.core.vector.VectorDataset attribute), 515
  - attrs (pycontrails.VectorDataset attribute), 171
  - azimuth (pycontrails.models.cocipgrid.CocipGridParams attribute), 333
  - azimuth() (in module pycontrails.physics.geo), 408
  - azimuth\_to\_direction() (in module pycontrails.physics.geo), 409
- ## B
- b\_contr() (pycontrails.models.pcc.PCC method), 271
  - B\_mu (pycontrails.models.cocip.radiative\_forcing.RFConstants attribute), 306
  - BADA3 (class in pycontrails.ext.bada), 538
  - BADA4 (class in pycontrails.ext.bada), 542
  - BADAFFlight (class in pycontrails.ext.bada), 528
  - BADAFFlightParams (class in pycontrails.ext.bada), 531



- BADAGrid (class in *pycontrails.ext.bada*), 533
- BADAGridParams (class in *pycontrails.ext.bada*), 536
- bc\_mass\_concentration\_cruise\_fox() (in module *pycontrails.models.emissions.black\_carbon*), 366
- bc\_mass\_concentration\_fox() (in module *pycontrails.models.emissions.black\_carbon*), 366
- bc\_mass\_concentration\_imfox() (in module *pycontrails.models.emissions.black\_carbon*), 366
- bc\_mass\_emissions\_index() (in module *pycontrails.models.emissions.black\_carbon*), 367
- binary (*pycontrails.core.met.MetDataArray* property), 484
- binary (*pycontrails.MetDataArray* property), 162
- broadcast\_attrs() (*pycontrails.core.vector.VectorDataset* method), 515
- broadcast\_attrs() (*pycontrails.VectorDataset* method), 171
- broadcast\_coords() (*pycontrails.core.met.MetBase* method), 481
- broadcast\_coords() (*pycontrails.core.met.MetDataArray* method), 485
- broadcast\_coords() (*pycontrails.core.met.MetDataset* method), 493
- broadcast\_coords() (*pycontrails.MetDataArray* method), 163
- broadcast\_coords() (*pycontrails.MetDataset* method), 155
- broadcast\_numeric\_attrs() (*pycontrails.core.vector.VectorDataset* method), 515
- broadcast\_numeric\_attrs() (*pycontrails.VectorDataset* method), 172
- brunt\_vaisala\_frequency() (in module *pycontrails.physics.thermo*), 394
- bucket (*pycontrails.core.cache.GCPCacheStore* attribute), 439
- bucket (*pycontrails.GCPCacheStore* attribute), 427
- buffer\_and\_clean() (in module *pycontrails.core.polygon*), 507
- C**
- C (*pycontrails.datalib.goes.GOESRegion* attribute), 251
- c\_l\_do (*pycontrails.models.ps\_model.PSAircraftEngineParams* attribute), 359
- c\_ms1 (in module *pycontrails.physics.constants*), 392
- C\_mu (*pycontrails.models.cocip.radiative\_forcing.RFConstants* attribute), 306
- c\_p\_combustion (in module *pycontrails.physics.constants*), 392
- c\_pd (in module *pycontrails.physics.constants*), 392
- c\_pm() (in module *pycontrails.physics.thermo*), 394
- c\_pv (in module *pycontrails.physics.constants*), 392
- c\_r (in module *pycontrails.physics.constants*), 392
- c\_t\_des (*pycontrails.models.ps\_model.PSAircraftEngineParams* attribute), 359
- cache\_dataset() (*pycontrails.core.datalib.MetDataSource* method), 445
- cache\_dataset() (*pycontrails.datalib.ecmwf.IFS* method), 236
- cache\_dataset() (*pycontrails.datalib.gfs.GFSForecast* method), 240
- cache\_dir (*pycontrails.core.cache.CacheStore* attribute), 433
- cache\_dir (*pycontrails.core.cache.DiskCacheStore* attribute), 435
- cache\_dir (*pycontrails.DiskCacheStore* attribute), 423
- CacheStore (class in *pycontrails.core.cache*), 433
- cachestore (*pycontrails.core.datalib.MetDataSource* attribute), 445
- cachestore (*pycontrails.core.met.MetBase* attribute), 481
- cachestore (*pycontrails.core.met.MetDataArray* attribute), 485
- cachestore (*pycontrails.core.met.MetDataset* attribute), 493
- cachestore (*pycontrails.datalib.gfs.GFSForecast* attribute), 241
- calculate\_aircraft\_performance() (*pycontrails.core.aircraft\_performance.AircraftPerformance* method), 342
- calculate\_aircraft\_performance() (*pycontrails.ext.bada.BADA3* method), 540
- calculate\_aircraft\_performance() (*pycontrails.ext.bada.BADA4* method), 544
- calculate\_aircraft\_performance() (*pycontrails.ext.bada.BADAFlight* method), 529
- calculate\_aircraft\_performance() (*pycontrails.models.ps\_model.PSFlight* method), 351
- cds (*pycontrails.datalib.ecmwf.ERA5* attribute), 219
- ch4\_scaling (*pycontrails.models.accf.ACCFParams* attribute), 340
- check\_aircraft\_type\_availability() (*pycontrails.models.ps\_model.PSFlight* method), 352
- chunk\_list() (in module *pycontrails.utils.iteration*), 524
- chunk\_size (*pycontrails.core.cache.GCPCacheStore* attribute), 439
- chunk\_size (*pycontrails.GCPCacheStore* attribute), 427
- cirrus\_effective\_extinction\_coef() (in module *pycontrails.models.tau\_cirrus*), 374
- clean\_and\_resample() (*pycontrails.core.fleet.Fleet* method), 450
- clean\_and\_resample() (*pycontrails.core.flight.Flight* method), 450

- method*), 459
- `clean_and_resample()` (*pycontrails.Fleet method*), 203
- `clean_and_resample()` (*pycontrails.Flight method*), 189
- `clear()` (*pycontrails.core.cache.DiskCacheStore method*), 435
- `clear()` (*pycontrails.DiskCacheStore method*), 423
- `clear_disk()` (*pycontrails.core.cache.GCPCacheStore method*), 439
- `clear_disk()` (*pycontrails.GCPCacheStore method*), 427
- `client` (*pycontrails.core.cache.GCPCacheStore property*), 439
- `client` (*pycontrails.datalib.gfs.GFSForecast attribute*), 241
- `client` (*pycontrails.GCPCacheStore property*), 428
- `climate_indicator` (*pycontrails.models.accf.ACCFParams attribute*), 340
- `CLIMB` (*pycontrails.core.flight.FlightPhase attribute*), 471
- `CLIMB` (*pycontrails.FlightPhase attribute*), 210
- `climb_descent_angle()` (*in module pycontrails.physics.jet*), 399
- `clip_mach_number()` (*in module pycontrails.physics.jet*), 399
- `clip_upper` (*pycontrails.models.humidity\_scaling.ExponentialBoostHumidityScalingParams attribute*), 379
- `cloud_model` (*pycontrails.models.pcc.PCCParams attribute*), 272
- `co2_scaling` (*pycontrails.models.accf.ACCFParams attribute*), 340
- `co_hc_emissions_index_profile()` (*in module pycontrails.models.emissions.ffm2*), 372
- `Cocip` (*class in pycontrails.models.cocip*), 272
- `CocipGrid` (*class in pycontrails.models.cocipgrid*), 321
- `CocipGridParams` (*class in pycontrails.models.cocipgrid*), 328
- `CocipParams` (*class in pycontrails.models.cocip*), 280
- `combustor_inlet_pressure()` (*in module pycontrails.physics.jet*), 400
- `combustor_inlet_temperature()` (*in module pycontrails.physics.jet*), 400
- `compressor_inlet_pressure()` (*in module pycontrails.physics.jet*), 401
- `compressor_inlet_temperature()` (*in module pycontrails.physics.jet*), 401
- `compute_atr20` (*pycontrails.models.cocip.CocipParams attribute*), 284
- `compute_tau_cirrus_in_model_init` (*pycontrails.models.cocip.CocipParams attribute*), 284
- `ConstantHumidityScaling` (*class in pycontrails.models.humidity\_scaling*), 376
- `ConstantHumidityScalingParams` (*class in pycontrails.models.humidity\_scaling*), 377
- `constants` (*pycontrails.core.vector.GeoVectorDataset property*), 511
- `constants` (*pycontrails.GeoVectorDataset property*), 180
- `cont_scaling` (*pycontrails.models.accf.ACCFParams attribute*), 340
- `contrail` (*pycontrails.models.cocip.Cocip attribute*), 275
- `contrail` (*pycontrails.models.cocipgrid.CocipGrid attribute*), 323
- `contrail_albedo()` (*in module pycontrails.models.cocip.radiative\_forcing*), 307
- `contrail_contrail_overlap_radiative_effects()` (*in module pycontrails.models.cocip.radiative\_forcing*), 308
- `contrail_contrail_overlapping` (*pycontrails.models.cocip.CocipParams attribute*), 284
- `contrail_dataset` (*pycontrails.models.cocip.Cocip attribute*), 276
- `contrail_edges()` (*in module pycontrails.models.cocip.contrail\_properties*), 288
- `contrail_effective_emissivity()` (*in module pycontrails.models.cocip.radiative\_forcing*), 309
- `contrail_list` (*pycontrails.models.cocip.Cocip attribute*), 276
- `contrail_list` (*pycontrails.models.cocipgrid.CocipGrid attribute*), 323
- `contrail_optical_depth()` (*in module pycontrails.models.cocip.contrail\_properties*), 289
- `contrail_persistent()` (*in module pycontrails.models.cocip.contrail\_properties*), 289
- `contrail_vertices()` (*in module pycontrails.models.cocip.contrail\_properties*), 290
- `coords` (*pycontrails.core.met.MetBase property*), 481
- `coords` (*pycontrails.core.vector.GeoVectorDataset property*), 511
- `coords` (*pycontrails.GeoVectorDataset property*), 181
- `coords_intersect_met()` (*pycontrails.core.vector.GeoVectorDataset method*), 511
- `coords_intersect_met()` (*pycontrails.GeoVectorDataset method*), 181
- `copy()` (*pycontrails.core.fleet.Fleet method*), 451
- `copy()` (*pycontrails.core.flight.Flight method*), 460
- `copy()` (*pycontrails.core.met.MetdataArray method*), 485
- `copy()` (*pycontrails.core.met.MetDataset method*), 493

- copy() (*pycontrails.core.vector.VectorDataset* method), 515
- copy() (*pycontrails.Fleet* method), 204
- copy() (*pycontrails.Flight* method), 190
- copy() (*pycontrails.MetdataArray* method), 163
- copy() (*pycontrails.MetDataset* method), 156
- copy() (*pycontrails.VectorDataset* method), 172
- copy\_source (*pycontrails.core.models.ModelParams* attribute), 505
- copy\_source (*pycontrails.ModelParams* attribute), 259
- correct\_fuel\_flow (*pycontrails.core.aircraft\_performance.AircraftPerformanceParams* attribute), 348
- cos\_sweep (*pycontrails.models.ps\_model.PSAircraftEngine* attribute), 360
- cosine\_solar\_zenith\_angle() (in module *pycontrails.physics.geo*), 409
- create\_cachepath() (*pycontrails.core.datalib.MetDataSource* method), 445
- create\_cachepath() (*pycontrails.datalib.ecmwf.arco\_era5.ARCOERA5* method), 245
- create\_cachepath() (*pycontrails.datalib.ecmwf.ERA5* method), 219
- create\_cachepath() (*pycontrails.datalib.ecmwf.era5\_model\_level.ERA5ModelLevel* method), 222
- create\_cachepath() (*pycontrails.datalib.ecmwf.HRES* method), 227
- create\_cachepath() (*pycontrails.datalib.ecmwf.hres\_model\_level.HRESModelLevel* method), 231
- create\_cachepath() (*pycontrails.datalib.ecmwf.IFS* method), 236
- create\_cachepath() (*pycontrails.datalib.gfs.GFSForecast* method), 241
- create\_empty() (*pycontrails.core.vector.GeoVectorDataset* class method), 511
- create\_empty() (*pycontrails.core.vector.VectorDataset* class method), 516
- create\_empty() (*pycontrails.GeoVectorDataset* class method), 181
- create\_empty() (*pycontrails.VectorDataset* class method), 172
- create\_source() (*pycontrails.models.cocipgrid.CocipGrid* static method), 323
- create\_synoptic\_time\_ranges() (*pycontrails.datalib.ecmwf.HRES* class method), 227
- CRUISE (*pycontrails.core.flight.FlightPhase* attribute), 471
- CRUISE (*pycontrails.FlightPhase* attribute), 210
- ## D
- data (*pycontrails.core.met.MetBase* attribute), 481
- data (*pycontrails.core.met.MetdataArray* attribute), 485
- data (*pycontrails.core.met.MetDataset* attribute), 493
- data (*pycontrails.core.vector.VectorDataset* attribute), 516
- data (*pycontrails.MetdataArray* attribute), 163
- data (*pycontrails.MetDataset* attribute), 156
- data (*pycontrails.VectorDataset* attribute), 172
- dataframe (*pycontrails.core.vector.VectorDataset* property), 516
- dataframe (*pycontrails.VectorDataset* property), 172
- dataframe\_to\_geojson\_points() (in module *pycontrails.utils.json*), 526
- dataset (*pycontrails.datalib.ecmwf.ERA5* property), 219
- dataset (*pycontrails.datalib.ecmwf.era5\_model\_level.ERA5ModelLevel* property), 222
- dataset\_attr (*pycontrails.core.met.MetDataset* property), 493
- dataset\_attr (*pycontrails.MetDataset* property), 156
- DatetimeLike (class in *pycontrails.utils.types*), 523
- days\_since\_reference\_year() (in module *pycontrails.physics.geo*), 410
- default() (*pycontrails.utils.json.NumpyEncoder* method), 526
- DEFAULT\_CHANNELS (in module *pycontrails.datalib.goes*), 248
- DEFAULT\_CHUNKS (in module *pycontrails.core.datalib*), 445
- DEFAULT\_LOAD\_FACTOR (in module *pycontrails.core.aircraft\_performance*), 348
- default\_nvpm\_ei\_n (*pycontrails.models.cocip.CocipParams* attribute), 284
- default\_params (*pycontrails.core.models.Model* attribute), 501
- default\_params (*pycontrails.ext.bada.BADAFlight* attribute), 530
- default\_params (*pycontrails.ext.bada.BADAGrid* attribute), 534
- default\_params (*pycontrails.Model* attribute), 254
- default\_params (*pycontrails.models.accf.ACCF* attribute), 336
- default\_params (*pycontrails.models.cocip.Cocip* attribute), 276
- default\_params (*pycontrails.models.cocipgrid.CocipGrid* attribute), 324
- default\_params (*pycontrails.models.emissions.Emissions* attribute), 363

default\_params (pycontrails.models.humidity\_scaling.ConstantHumidityScaling attribute), 376  
 default\_params (pycontrails.models.humidity\_scaling.ExponentialBoostHumidityScaling attribute), 378  
 default\_params (pycontrails.models.humidity\_scaling.ExponentialBoostHumidityScaling module property), 385  
 default\_params (pycontrails.models.humidity\_scaling.HistogramMatching attribute), 381  
 default\_params (pycontrails.models.humidity\_scaling.HistogramMatchingWithEckert attribute), 383  
 default\_params (pycontrails.models.humidity\_scaling.HumidityScalingByDistance attribute), 387  
 default\_params (pycontrails.models.issr.ISSR attribute), 261  
 default\_params (pycontrails.models.pcc.PCC attribute), 271  
 default\_params (pycontrails.models.pcr.PCR attribute), 267  
 default\_params (pycontrails.models.ps\_model.PSFlight attribute), 352  
 default\_params (pycontrails.models.ps\_model.PSGrid attribute), 354  
 default\_params (pycontrails.models.sac.SAC attribute), 263  
 default\_path (pycontrails.ext.bada.BADA3 attribute), 541  
 default\_path (pycontrails.ext.bada.BADA4 attribute), 545  
 degrees\_to\_radians() (in module pycontrails.physics.units), 417  
 delta\_2 (pycontrails.models.ps\_model.PSAircraftEngineParams attribute), 360  
 delta\_lc (pycontrails.models.cocip.radiative\_forcing.RFConstants attribute), 306  
 delta\_lr (pycontrails.models.cocip.radiative\_forcing.RFConstants attribute), 306  
 delta\_sc (pycontrails.models.cocip.radiative\_forcing.RFConstants attribute), 307  
 delta\_sc\_aps (pycontrails.models.cocip.radiative\_forcing.RFConstants attribute), 307  
 delta\_sr (pycontrails.models.cocip.radiative\_forcing.RFConstants attribute), 307  
 delta\_t (pycontrails.models.cocip.radiative\_forcing.RFConstants attribute), 307  
 density\_ratio() (in module pycontrails.physics.jet), 401  
 DESCENT (pycontrails.core.flight.FlightPhase attribute), 471  
 DESCENT (pycontrails.FlightPhase attribute), 210  
 description (pycontrails.core.met\_var.MetVariable attribute), 499  
 description (pycontrails.models.humidity\_scaling.HumidityScaling module property), 385  
 data\_lib (pycontrails.core.polygon), 507  
 dim\_order (pycontrails.core.met.MetBase attribute), 481  
 DiskCacheStore (class in pycontrails), 422  
 DiskCacheStore (class in pycontrails.core.cache), 435  
 distance\_to\_airports() (in module pycontrails.core.airports), 432  
 distance\_to\_coords() (pycontrails.core.flight.Flight method), 460  
 distance\_to\_coords() (pycontrails.Flight method), 190  
 domain\_surface\_area() (in module pycontrails.physics.geo), 410  
 dopelheuer\_lecht\_scaling\_factor() (in module pycontrails.models.emissions.black\_carbon), 367  
 download() (pycontrails.core.datalib.MetDataSource method), 445  
 download\_dataset() (pycontrails.core.datalib.MetDataSource method), 445  
 download\_dataset() (pycontrails.datalib.ecmwf.arco\_era5.ARCOERA5 method), 245  
 download\_dataset() (pycontrails.datalib.ecmwf.ERA5 method), 219  
 download\_dataset() (pycontrails.datalib.ecmwf.era5\_model\_level.ERA5ModelLevel method), 223  
 download\_dataset() (pycontrails.datalib.ecmwf.HRES method), 228  
 download\_dataset() (pycontrails.datalib.ecmwf.hres\_model\_level.HRESModelLevel method), 232  
 download\_dataset() (pycontrails.datalib.ecmwf.IFS method), 237  
 download\_dataset() (pycontrails.datalib.gfs.GFSForecast method), 241  
 downselect() (in module pycontrails.core.met), 497  
 downselect() (pycontrails.core.met.MetBase method), 481  
 downselect() (pycontrails.core.met.MetdataArray method), 485  
 downselect() (pycontrails.core.met.MetDataset method), 493  
 downselect() (pycontrails.MetdataArray method), 163

- downselect() (*pycontrails.MetDataset* method), 156  
 downselect\_met (*pycontrails.core.models.ModelParams* attribute), 505  
 downselect\_met (*pycontrails.ModelParams* attribute), 259  
 downselect\_met() (*pycontrails.core.met.MetBase* method), 481  
 downselect\_met() (*pycontrails.core.models.Model* method), 501  
 downselect\_met() (*pycontrails.core.vector.GeoVectorDataset* method), 511  
 downselect\_met() (*pycontrails.GeoVectorDataset* method), 181  
 downselect\_met() (*pycontrails.Model* method), 254  
 downward\_displacement\_strongly\_stratified() (in module *pycontrails.models.cocip.wake\_vortex*), 315  
 downward\_displacement\_weakly\_stratified() (in module *pycontrails.models.cocip.wake\_vortex*), 316  
 dsn\_dz\_factor (*pycontrails.models.cocipgrid.CocipGridParams* attribute), 333  
 dt\_integration (*pycontrails.models.cocip.CocipParams* attribute), 284  
 dt\_to\_seconds() (in module *pycontrails.physics.units*), 417  
 duration (*pycontrails.core.flight.Flight* property), 461  
 duration (*pycontrails.Flight* property), 190  
 dz\_m (*pycontrails.models.cocip.CocipParams* attribute), 284  
 dz\_overlap\_m (*pycontrails.models.cocip.CocipParams* attribute), 284
- ## E
- e\_sat\_ice() (in module *pycontrails.physics.thermo*), 395  
 e\_sat\_liquid() (in module *pycontrails.physics.thermo*), 395  
 eckel\_scaling() (in module *pycontrails.models.humidity\_scaling*), 388  
 ecmwf\_id (*pycontrails.core.met\_var.MetVariable* attribute), 500  
 ecmwf\_link (*pycontrails.core.met\_var.MetVariable* property), 500  
 effective\_radius\_by\_habit() (in module *pycontrails.models.cocip.radiative\_forcing*), 309  
 effective\_radius\_droxtal() (in module *pycontrails.models.cocip.radiative\_forcing*), 310  
 effective\_radius\_hollow\_column() (in module *pycontrails.models.cocip.radiative\_forcing*), 310  
 effective\_radius\_myhre() (in module *pycontrails.models.cocip.radiative\_forcing*), 310  
 effective\_radius\_plate() (in module *pycontrails.models.cocip.radiative\_forcing*), 310  
 effective\_radius\_rosette() (in module *pycontrails.models.cocip.radiative\_forcing*), 310  
 effective\_radius\_rough\_aggregate() (in module *pycontrails.models.cocip.radiative\_forcing*), 310  
 effective\_radius\_solid\_column() (in module *pycontrails.models.cocip.radiative\_forcing*), 311  
 effective\_radius\_sphere() (in module *pycontrails.models.cocip.radiative\_forcing*), 311  
 effective\_tau\_cirrus() (in module *pycontrails.models.cocip.radiative\_forcing*), 311  
 effective\_time\_scale() (in module *pycontrails.models.cocip.wake\_vortex*), 317  
 effective\_vertical\_resolution (*pycontrails.models.cocip.CocipParams* attribute), 284  
 efficacy (*pycontrails.models.accf.ACcfParams* attribute), 340  
 efficacy\_option (*pycontrails.models.accf.ACcfParams* attribute), 341  
 ei\_at\_cruise() (in module *pycontrails.models.emissions.ffm2*), 372  
 ei\_co2 (*pycontrails.core.fuel.Fuel* attribute), 474  
 ei\_co2 (*pycontrails.core.fuel.HydrogenFuel* attribute), 475  
 ei\_co2 (*pycontrails.core.fuel.JetA* attribute), 475  
 ei\_co2 (*pycontrails.core.fuel.SAFBlend* attribute), 476  
 ei\_co2 (*pycontrails.Fuel* attribute), 211  
 ei\_co2 (*pycontrails.HydrogenFuel* attribute), 215  
 ei\_co2 (*pycontrails.JetA* attribute), 213  
 ei\_h2o (*pycontrails.core.fuel.Fuel* attribute), 474  
 ei\_h2o (*pycontrails.core.fuel.HydrogenFuel* attribute), 475  
 ei\_h2o (*pycontrails.core.fuel.JetA* attribute), 475  
 ei\_h2o (*pycontrails.core.fuel.SAFBlend* attribute), 476  
 ei\_h2o (*pycontrails.Fuel* attribute), 211  
 ei\_h2o (*pycontrails.HydrogenFuel* attribute), 215  
 ei\_h2o (*pycontrails.JetA* attribute), 213  
 ei\_oc (*pycontrails.core.fuel.Fuel* attribute), 474  
 ei\_oc (*pycontrails.core.fuel.HydrogenFuel* attribute), 475  
 ei\_oc (*pycontrails.core.fuel.JetA* attribute), 475  
 ei\_oc (*pycontrails.core.fuel.SAFBlend* attribute), 476  
 ei\_oc (*pycontrails.Fuel* attribute), 211  
 ei\_oc (*pycontrails.HydrogenFuel* attribute), 215  
 ei\_oc (*pycontrails.JetA* attribute), 213  
 ei\_so2 (*pycontrails.core.fuel.Fuel* attribute), 474  
 ei\_so2 (*pycontrails.core.fuel.HydrogenFuel* attribute), 475

- ei\_so2 (*pycontrails.core.fuel.JetA* attribute), 475
- ei\_so2 (*pycontrails.core.fuel.SAFBlend* attribute), 476
- ei\_so2 (*pycontrails.Fuel* attribute), 211
- ei\_so2 (*pycontrails.HydrogenFuel* attribute), 215
- ei\_so2 (*pycontrails.JetA* attribute), 213
- ei\_sulphates (*pycontrails.core.fuel.Fuel* attribute), 474
- ei\_sulphates (*pycontrails.core.fuel.HydrogenFuel* attribute), 475
- ei\_sulphates (*pycontrails.core.fuel.JetA* attribute), 476
- ei\_sulphates (*pycontrails.core.fuel.SAFBlend* attribute), 476
- ei\_sulphates (*pycontrails.Fuel* attribute), 211
- ei\_sulphates (*pycontrails.HydrogenFuel* attribute), 215
- ei\_sulphates (*pycontrails.JetA* attribute), 213
- email (*pycontrails.datalib.ecmwf.HRES* attribute), 228
- emission\_scenario (*pycontrails.models.accf.ACCFParams* attribute), 341
- Emissions (*class in pycontrails.models.emissions*), 362
- EmissionsProfileInterpolator (*class in pycontrails.core.interpolation*), 477
- energy\_forcing() (*in module pycontrails.models.cocip.contrail\_properties*), 290
- engine\_efficiency (*pycontrails.core.aircraft\_performance.AircraftPerformance* attribute), 345
- engine\_efficiency (*pycontrails.core.aircraft\_performance.AircraftPerformance* attribute), 346
- engine\_efficiency (*pycontrails.models.cocipgrid.CocipGridParams* attribute), 333
- engine\_efficiency (*pycontrails.models.pcc.PCCParams* attribute), 272
- engine\_efficiency (*pycontrails.models.sac.SACParams* attribute), 264
- engine\_uid (*pycontrails.ext.bada.BADAGridParams* attribute), 537
- engine\_uid (*pycontrails.models.cocipgrid.CocipGridParams* attribute), 333
- ensemble\_specific\_humidity (*pycontrails.models.humidity\_scaling.HistogramMatchingWithEck* attribute), 385
- ensure\_true\_airspeed\_on\_source() (*pycontrails.core.aircraft\_performance.AircraftPerformance* method), 343
- ensure\_vars() (*pycontrails.core.met.MetDataset* method), 493
- ensure\_vars() (*pycontrails.core.vector.VectorDataset* method), 516
- ensure\_vars() (*pycontrails.MetDataset* method), 156
- ensure\_vars() (*pycontrails.VectorDataset* method), 172
- epsilon (*in module pycontrails.physics.constants*), 392
- equivalent\_fuel\_flow\_rate\_at\_cruise() (*in module pycontrails.physics.jet*), 401
- equivalent\_fuel\_flow\_rate\_at\_sea\_level() (*in module pycontrails.physics.jet*), 402
- ERA5 (*class in pycontrails.datalib.ecmwf*), 216
- ERA5ModelLevel (*class in pycontrails.datalib.ecmwf.era5\_model\_level*), 221
- estimate\_ei() (*in module pycontrails.models.emissions.ffm2*), 373
- estimate\_nox() (*in module pycontrails.models.emissions.ffm2*), 373
- eta\_1 (*pycontrails.models.ps\_model.PSAircraftEngineParams* attribute), 360
- eta\_2 (*pycontrails.models.ps\_model.PSAircraftEngineParams* attribute), 360
- eta\_over\_eta\_b\_min (*pycontrails.models.ps\_model.PSFlightParams* attribute), 349
- eval() (*pycontrails.core.aircraft\_performance.AircraftPerformance* method), 343
- eval() (*pycontrails.core.aircraft\_performance.AircraftPerformanceGrid* method), 346
- eval() (*pycontrails.core.models.Model* method), 501
- eval() (*pycontrails.ext.bada.BADAFlight* method), 530
- eval() (*pycontrails.ext.bada.BADAGrid* method), 534
- eval() (*pycontrails.Model* method), 255
- eval() (*pycontrails.models.accf.ACCF* method), 336
- eval() (*pycontrails.models.cocip.Cocip* method), 276
- eval() (*pycontrails.models.cocipgrid.CocipGrid* method), 324
- eval() (*pycontrails.models.emissions.Emissions* method), 364
- eval() (*pycontrails.models.humidity\_scaling.HistogramMatchingWithEck* method), 383
- eval() (*pycontrails.models.humidity\_scaling.HumidityScaling* method), 385
- eval() (*pycontrails.models.issr.ISSR* method), 261
- eval() (*pycontrails.models.pcc.PCC* method), 271
- eval() (*pycontrails.models.pcr.PCR* method), 268
- eval() (*pycontrails.models.ps\_model.PSFlight* method), 352
- eval() (*pycontrails.models.ps\_model.PSGrid* method), 354
- eval() (*pycontrails.models.sac.SAC* method), 263
- exhaust\_gas\_volume\_per\_kg\_fuel() (*in module pycontrails.models.emissions.black\_carbon*), 368
- exists() (*pycontrails.core.cache.CacheStore* method), 433
- exists() (*pycontrails.core.cache.DiskCacheStore* method), 436

- exists() (*pycontrails.core.cache.GPCCacheStore* method), 439
- exists() (*pycontrails.DiskCacheStore* method), 423
- exists() (*pycontrails.GPCCacheStore* method), 428
- ExponentialBoostHumidityScaling (class in *pycontrails.models.humidity\_scaling*), 377
- ExponentialBoostHumidityScalingParams (class in *pycontrails.models.humidity\_scaling*), 379
- ExponentialBoostLatitudeCorrectionHumidityScaling (class in *pycontrails.models.humidity\_scaling*), 379
- extract\_goes\_visualization() (in module *pycontrails.datalib.goes*), 251
- ## F
- F (*pycontrails.datalib.goes.GOESRegion* attribute), 251
- f\_00 (*pycontrails.models.ps\_model.PSAircraftEngineParams* attribute), 360
- F\_r (*pycontrails.models.cocip.radiative\_forcing.RFConstants* attribute), 306
- ff\_idle\_sls (*pycontrails.models.ps\_model.PSAircraftEngineParams* attribute), 360
- ff\_max\_sls (*pycontrails.models.ps\_model.PSAircraftEngineParams* attribute), 360
- field\_type (*pycontrails.datalib.ecmwf.HRES* attribute), 228
- filename() (*pycontrails.datalib.gfs.GFSForecast* method), 241
- filter() (*pycontrails.core.fleet.Fleet* method), 451
- filter() (*pycontrails.core.flight.Flight* method), 461
- filter() (*pycontrails.core.vector.VectorDataset* method), 516
- filter() (*pycontrails.Fleet* method), 204
- filter() (*pycontrails.Flight* method), 190
- filter() (*pycontrails.VectorDataset* method), 173
- filter\_altitude() (in module *pycontrails.core.flight*), 472
- filter\_altitude() (*pycontrails.core.flight.Flight* method), 461
- filter\_altitude() (*pycontrails.Flight* method), 191
- filter\_by\_first() (*pycontrails.core.flight.Flight* method), 462
- filter\_by\_first() (*pycontrails.Flight* method), 191
- filter\_initially\_persistent (*pycontrails.models.cocip.CocipParams* attribute), 284
- filter\_sac (*pycontrails.models.cocip.CocipParams* attribute), 285
- final\_waypoints (*pycontrails.core.fleet.Fleet* attribute), 451
- final\_waypoints (*pycontrails.Fleet* attribute), 204
- find\_edges() (*pycontrails.core.met.MetDataArray* method), 485
- find\_edges() (*pycontrails.MetDataArray* method), 163
- find\_multipolygon() (in module *pycontrails.core.polygon*), 508
- find\_nearest\_airport() (in module *pycontrails.core.airports*), 432
- fl\_attrs (*pycontrails.core.fleet.Fleet* attribute), 451
- fl\_attrs (*pycontrails.Fleet* attribute), 204
- fl\_max (*pycontrails.models.ps\_model.PSAircraftEngineParams* attribute), 360
- flame\_temperature() (in module *pycontrails.models.emissions.black\_carbon*), 368
- Fleet (class in *pycontrails*), 201
- Fleet (class in *pycontrails.core.fleet*), 450
- Flight (class in *pycontrails*), 184
- Flight (class in *pycontrails.core.flight*), 457
- FlightPhase (class in *pycontrails*), 210
- FlightPhase (class in *pycontrails.core.flight*), 471
- forecast\_date (*pycontrails.datalib.ecmwf.IFS* attribute), 237
- forecast\_path (*pycontrails.datalib.ecmwf.IFS* attribute), 237
- forecast\_path (*pycontrails.datalib.gfs.GFSForecast* property), 241
- forecast\_step (*pycontrails.models.accf.ACCFParams* attribute), 341
- forecast\_time (*pycontrails.datalib.ecmwf.HRES* attribute), 228
- forecast\_time (*pycontrails.datalib.gfs.GFSForecast* attribute), 241
- formula (*pycontrails.models.humidity\_scaling.ConstantHumidityScaling* attribute), 376
- formula (*pycontrails.models.humidity\_scaling.ExponentialBoostHumidityScaling* attribute), 378
- formula (*pycontrails.models.humidity\_scaling.ExponentialBoostLatitudeCorrectionHumidityScaling* attribute), 380
- formula (*pycontrails.models.humidity\_scaling.HistogramMatching* attribute), 381
- formula (*pycontrails.models.humidity\_scaling.HistogramMatchingWithEck* attribute), 383
- formula (*pycontrails.models.humidity\_scaling.HumidityScaling* property), 385
- formula (*pycontrails.models.humidity\_scaling.HumidityScalingByLevel* attribute), 387
- forward\_azimuth() (in module *pycontrails.physics.geo*), 410
- from\_coords() (*pycontrails.core.met.MetDataset* class method), 494
- from\_coords() (*pycontrails.MetDataset* class method), 156
- from\_dict() (*pycontrails.core.vector.VectorDataset* class method), 517
- from\_dict() (*pycontrails.VectorDataset* class method), 173
- from\_seq() (*pycontrails.core.fleet.Fleet* class method), 452

- from\_seq() (*pycontrails.Fleet class method*), 205  
 from\_zarr() (*pycontrails.core.met.MetDataset class method*), 495  
 from\_zarr() (*pycontrails.MetDataset class method*), 158  
 ft\_to\_m() (*in module pycontrails.physics.units*), 417  
 ft\_to\_pl() (*in module pycontrails.physics.units*), 418  
 Fuel (*class in pycontrails*), 211  
 Fuel (*class in pycontrails.core.fuel*), 474  
 fuel (*pycontrails.core.aircraft\_performance.AircraftPerformanceGridParams attribute*), 347  
 fuel (*pycontrails.core.flight.Flight attribute*), 462  
 fuel (*pycontrails.Flight attribute*), 192  
 fuel (*pycontrails.models.cocipgrid.CocipGridParams attribute*), 333  
 fuel (*pycontrails.models.pcc.PCCParams attribute*), 272  
 fuel (*pycontrails.models.sac.SACParams attribute*), 264  
 fuel\_burn (*pycontrails.core.aircraft\_performance.AircraftPerformanceData attribute*), 345  
 fuel\_burn() (*in module pycontrails.physics.jet*), 402  
 fuel\_flow (*pycontrails.core.aircraft\_performance.AircraftPerformanceData attribute*), 345  
 fuel\_flow (*pycontrails.core.aircraft\_performance.AircraftPerformanceGridParams attribute*), 346  
 fuel\_flow (*pycontrails.models.cocipgrid.CocipGridParams attribute*), 333  
 fuel\_name (*pycontrails.core.fuel.Fuel attribute*), 474  
 fuel\_name (*pycontrails.core.fuel.HydrogenFuel attribute*), 475  
 fuel\_name (*pycontrails.core.fuel.JetA attribute*), 476  
 fuel\_name (*pycontrails.core.fuel.SAFBlend attribute*), 476  
 fuel\_name (*pycontrails.Fuel attribute*), 211  
 fuel\_name (*pycontrails.HydrogenFuel attribute*), 216  
 fuel\_name (*pycontrails.JetA attribute*), 213  
 fuselage\_width (*pycontrails.models.ps\_model.PSAircraftEngineParams attribute*), 360
- ## G
- g (*in module pycontrails.physics.constants*), 392  
 gamma (*in module pycontrails.physics.constants*), 392  
 gamma\_lower (*pycontrails.models.cocip.radiative\_forcing.RFConstants attribute*), 307  
 gamma\_upper (*pycontrails.models.cocip.radiative\_forcing.RFConstants attribute*), 307  
 GCPCacheStore (*class in pycontrails*), 426  
 GCPCacheStore (*class in pycontrails.core.cache*), 438  
 gcs\_goes\_path() (*in module pycontrails.datalib.goes*), 251  
 gcs\_goes\_path() (*pycontrails.datalib.goes.GOES method*), 250  
 generate\_mars\_request() (*pycontrails.datalib.ecmwf.HRES method*), 228  
 generate\_splits() (*pycontrails.core.vector.VectorDataset method*), 517  
 generate\_splits() (*pycontrails.VectorDataset method*), 173  
 geometric\_mean\_diameter\_sac() (*in module pycontrails.models.emissions.black\_carbon*), 368  
 GeoVectorDataset (*class in pycontrails*), 177  
 GeoVectorDataset (*class in pycontrails.core.vector*), 177  
 get() (*pycontrails.core.cache.CacheStore method*), 434  
 get() (*pycontrails.core.cache.DiskCacheStore method*), 436  
 get() (*pycontrails.core.cache.GCPCacheStore method*), 440  
 get() (*pycontrails.core.met.MetDataset method*), 495  
 get() (*pycontrails.core.vector.VectorDataset method*), 177  
 get() (*pycontrails.datalib.goes.GOES method*), 250  
 get() (*pycontrails.DiskCacheStore method*), 424  
 get() (*pycontrails.core.cache.GCPCacheStore method*), 428  
 get() (*pycontrails.MetDataset method*), 158  
 get() (*pycontrails.core.vector.VectorDataset method*), 173  
 get\_aircraft\_engine\_properties() (*pycontrails.ext.bada.BADA3 method*), 541  
 get\_aircraft\_engine\_properties() (*pycontrails.ext.bada.BADA4 method*), 545  
 get\_bada() (*pycontrails.ext.bada.BADAFlight method*), 530  
 get\_data\_or\_attr() (*pycontrails.core.vector.VectorDataset method*), 517  
 get\_data\_or\_attr() (*pycontrails.VectorDataset method*), 174  
 get\_forecast\_filename() (*in module pycontrails.datalib.ecmwf.hres*), 233  
 get\_forecast\_steps() (*pycontrails.datalib.ecmwf.hres\_model\_level.HRESModelLevel method*), 232  
 get\_source\_param() (*pycontrails.core.models.Model method*), 501  
 get\_source\_param() (*pycontrails.Model method*), 255  
 GFSForecast (*class in pycontrails.datalib.gfs*), 238  
 global\_airport\_database() (*in module pycontrails.core.airports*), 432  
 global\_rf\_to\_atr20\_factor (*pycontrails.models.cocip.CocipParams attribute*), 285  
 GOES (*class in pycontrails.datalib.goes*), 248  
 GOES\_SCAN\_MODE\_CHANGE (*in module pycontrails.datalib.goes*), 251  
 GOESRegion (*class in pycontrails.datalib.goes*), 250  
 grib1\_id (*pycontrails.core.met\_var.MetVariable attribute*), 500



- grib2\_id (*pycontrails.core.met\_var.MetVariable* attribute), 500
- grid (*pycontrails.core.datalib.MetDataSource* attribute), 445
- grid (*pycontrails.datalib.ecmwf.arco\_era5.ARCOERA5* attribute), 245
- grid (*pycontrails.datalib.ecmwf.era5\_model\_level.ERA5ModelLevel* attribute), 223
- grid (*pycontrails.datalib.ecmwf.hres\_model\_level.HRESModelLevel* attribute), 232
- grid (*pycontrails.datalib.gfs.GFSForecast* attribute), 242
- grid\_surface\_area() (in module *pycontrails.physics.geo*), 410
- gs\_path() (*pycontrails.core.cache.GPCCacheStore* method), 440
- gs\_path() (*pycontrails.GPCCacheStore* method), 429
- ## H
- h2o\_scaling (*pycontrails.models.accf.ACCFParams* attribute), 341
- h\_tropopause (in module *pycontrails.physics.constants*), 392
- habit\_distributions (*pycontrails.models.cocip.CocipParams* attribute), 285
- habit\_weight\_regime\_idx() (in module *pycontrails.models.cocip.radiative\_forcing*), 311
- habit\_weights() (in module *pycontrails.models.cocip.radiative\_forcing*), 312
- habits (*pycontrails.models.cocip.CocipParams* attribute), 285
- hash (*pycontrails.core.datalib.MetDataSource* property), 446
- hash (*pycontrails.core.met.MetBase* property), 482
- hash (*pycontrails.core.models.Model* property), 502
- hash (*pycontrails.core.vector.VectorDataset* property), 518
- hash (*pycontrails.datalib.ecmwf.ERA5* property), 220
- hash (*pycontrails.datalib.ecmwf.HRES* property), 228
- hash (*pycontrails.datalib.gfs.GFSForecast* property), 242
- hash (*pycontrails.Model* property), 255
- hash (*pycontrails.VectorDataset* property), 174
- haversine() (in module *pycontrails.physics.geo*), 411
- histogram\_matching() (in module *pycontrails.models.humidity\_scaling*), 389
- histogram\_matching\_all\_members() (in module *pycontrails.models.humidity\_scaling*), 389
- HistogramMatching (class in *pycontrails.models.humidity\_scaling*), 381
- HistogramMatchingParams (class in *pycontrails.models.humidity\_scaling*), 382
- HistogramMatchingWithEckel (class in *pycontrails.models.humidity\_scaling*), 383
- HistogramMatchingWithEckelParams (class in *pycontrails.models.humidity\_scaling*), 384
- horizontal\_diffusivity() (in module *pycontrails.models.cocip.contrail\_properties*), 290
- horizontal\_resolution (*pycontrails.models.accf.ACCFParams* attribute), 341
- hours\_since\_start\_of\_day() (in module *pycontrails.physics.geo*), 411
- HRES (class in *pycontrails.datalib.ecmwf*), 224
- HRESModelLevel (class in *pycontrails.datalib.ecmwf.hres\_model\_level*), 230
- humidity\_scaling (*pycontrails.models.cocip.CocipParams* attribute), 285
- humidity\_scaling (*pycontrails.models.issr.ISSRParams* attribute), 262
- humidity\_scaling (*pycontrails.models.pcc.PCCParams* attribute), 272
- humidity\_scaling (*pycontrails.models.sac.SACParams* attribute), 264
- HumidityScaling (class in *pycontrails.models.humidity\_scaling*), 385
- HumidityScalingByLevel (class in *pycontrails.models.humidity\_scaling*), 386
- HumidityScalingByLevelParams (class in *pycontrails.models.humidity\_scaling*), 388
- hydrogen\_content (*pycontrails.core.fuel.Fuel* attribute), 474
- hydrogen\_content (*pycontrails.core.fuel.HydrogenFuel* attribute), 475
- hydrogen\_content (*pycontrails.core.fuel.JetA* attribute), 476
- hydrogen\_content (*pycontrails.core.fuel.SAFBlend* attribute), 476
- hydrogen\_content (*pycontrails.Fuel* attribute), 212
- hydrogen\_content (*pycontrails.HydrogenFuel* attribute), 216
- hydrogen\_content (*pycontrails.JetA* attribute), 213
- HydrogenFuel (class in *pycontrails*), 215
- HydrogenFuel (class in *pycontrails.core.fuel*), 474
- ## I
- ice\_particle\_activation\_rate() (in module *pycontrails.models.cocip.contrail\_properties*), 291
- ice\_particle\_mass() (in module *pycontrails.models.cocip.contrail\_properties*), 291

*ice\_particle\_number()* (in module *pycontrails.models.cocip.contrail\_properties*), 292  
*ice\_particle\_number\_per\_mass\_of\_air()* (in module *pycontrails.models.cocip.contrail\_properties*), 292  
*ice\_particle\_number\_per\_volume\_of\_plume()* (in module *pycontrails.models.cocip.contrail\_properties*), 292  
*ice\_particle\_survival\_fraction()* (in module *pycontrails.models.cocip.contrail\_properties*), 293  
*ice\_particle\_terminal\_fall\_speed()* (in module *pycontrails.models.cocip.contrail\_properties*), 293  
*ice\_particle\_volume\_mean\_radius()* (in module *pycontrails.models.cocip.contrail\_properties*), 293  
 IFS (class in *pycontrails.datalib.ecmwf*), 235  
*in\_memory* (*pycontrails.core.met.MetaDataArray* property), 485  
*in\_memory* (*pycontrails.MetaDataArray* property), 163  
*indexes* (*pycontrails.core.met.MetaBase* property), 482  
*initial\_aircraft\_mass()* (in module *pycontrails.physics.jet*), 402  
*initial\_contrail\_depth()* (in module *pycontrails.models.cocip.wake\_vortex*), 317  
*initial\_contrail\_width()* (in module *pycontrails.models.cocip.wake\_vortex*), 317  
*initial\_iwc()* (in module *pycontrails.models.cocip.contrail\_properties*), 294  
*initial\_persistent()* (in module *pycontrails.models.cocip.contrail\_properties*), 294  
*initial\_wake\_vortex\_depth* (*pycontrails.models.cocip.CocipParams* attribute), 285  
*interp()* (in module *pycontrails.core.interpolation*), 479  
*interp()* (*pycontrails.core.interpolation.EmissionsProfileInterpolator* method), 478  
*interp\_kwargs* (*pycontrails.core.models.Model* property), 502  
*interp\_kwargs* (*pycontrails.Model* property), 256  
*interpolate()* (*pycontrails.core.met.MetaDataArray* method), 485  
*interpolate()* (*pycontrails.MetaDataArray* method), 163  
*interpolate\_gridded\_specific\_humidity()* (in module *pycontrails.core.models*), 506  
*interpolate\_met()* (in module *pycontrails.core.models*), 506  
*interpolation\_bounds\_error* (*pycontrails.core.models.ModelParams* attribute), 505  
*interpolation\_bounds\_error* (*pycontrails.ModelParams* attribute), 259  
*interpolation\_fill\_value* (*pycontrails.core.models.ModelParams* attribute), 505  
*interpolation\_fill\_value* (*pycontrails.ModelParams* attribute), 259  
*interpolation\_localize* (*pycontrails.core.models.ModelParams* attribute), 505  
*interpolation\_localize* (*pycontrails.ModelParams* attribute), 259  
*interpolation\_method* (*pycontrails.core.models.ModelParams* attribute), 505  
*interpolation\_method* (*pycontrails.ModelParams* attribute), 259  
*interpolation\_q\_method* (*pycontrails.core.models.ModelParams* attribute), 505  
*interpolation\_q\_method* (*pycontrails.ModelParams* attribute), 259  
*interpolation\_use\_indices* (*pycontrails.core.models.ModelParams* attribute), 505  
*interpolation\_use\_indices* (*pycontrails.ModelParams* attribute), 259  
*intersect\_domain()* (in module *pycontrails.core.coordinates*), 442  
*intersect\_met()* (*pycontrails.core.vector.GeoVectorDataset* method), 512  
*intersect\_met()* (*pycontrails.GeoVectorDataset* method), 182  
*is\_datafile\_cached()* (*pycontrails.core.datalib.MetaDataSource* method), 446  
*is\_single\_level* (*pycontrails.core.datalib.MetaDataSource* property), 446  
*is\_single\_level* (*pycontrails.core.met.MetaBase* property), 482  
*is\_within\_thrust\_limits()* (*pycontrails.ext.bada.BADA3* method), 541  
*is\_within\_thrust\_limits()* (*pycontrails.ext.bada.BADA4* method), 546  
*is\_wrapped* (*pycontrails.core.met.MetaBase* property), 483  
*is\_zarr* (*pycontrails.core.met.MetaBase* property), 483  
 ISSR (class in *pycontrails.models.issr*), 260  
*issr()* (in module *pycontrails.models.issr*), 262

- issr\_rhi\_threshold (pycontrails.models.accf.ACCFParams attribute), 341
- issr\_temp\_threshold (pycontrails.models.accf.ACCFParams attribute), 341
- ISSRParams (class in pycontrails.models.issr), 262
- iwc\_adiabatic\_heating() (in module pycontrails.models.cocip.contrail\_properties), 295
- iwc\_post\_wake\_vortex() (in module pycontrails.models.cocip.contrail\_properties), 295
- ## J
- j\_1 (pycontrails.models.ps\_model.PSAircraftEngineParams attribute), 360
- j\_2 (pycontrails.models.ps\_model.PSAircraftEngineParams attribute), 360
- j\_3 (pycontrails.models.ps\_model.PSAircraftEngineParams attribute), 360
- JetA (class in pycontrails), 212
- JetA (class in pycontrails.core.fuel), 475
- ## K
- k\_t (pycontrails.models.cocip.radiative\_forcing.RFConstants attribute), 307
- kappa (in module pycontrails.physics.constants), 392
- kelvin\_to\_celsius() (in module pycontrails.physics.units), 418
- key (pycontrails.datalib.ecmwf.ERA5 attribute), 220
- key (pycontrails.datalib.ecmwf.HRES attribute), 228
- knots\_to\_m\_per\_s() (in module pycontrails.physics.units), 418
- ## L
- lambda\_light (in module pycontrails.physics.constants), 392
- lat\_bound (pycontrails.models.accf.ACCFParams attribute), 341
- latitude\_distance\_to\_m() (in module pycontrails.physics.units), 418
- lbs\_to\_kg() (in module pycontrails.physics.units), 418
- length (pycontrails.core.flight.Flight property), 462
- length (pycontrails.Flight property), 192
- length\_met() (pycontrails.core.flight.Flight method), 463
- length\_met() (pycontrails.Flight method), 192
- level (pycontrails.core.vector.GeoVectorDataset property), 513
- level (pycontrails.GeoVectorDataset property), 183
- LEVEL\_FLIGHT (pycontrails.core.flight.FlightPhase attribute), 471
- LEVEL\_FLIGHT (pycontrails.FlightPhase attribute), 210
- level\_type (pycontrails.core.met\_var.MetVariable attribute), 500
- level\_type (pycontrails.models.humidity\_scaling.HistogramMatchingParams attribute), 382
- light\_wave\_phase\_delay() (in module pycontrails.models.cocip.contrail\_properties), 296
- list\_from\_mars() (pycontrails.datalib.ecmwf.HRES method), 228
- list\_timesteps\_cached() (pycontrails.core.datalib.MetDataSource method), 446
- list\_timesteps\_not\_cached() (pycontrails.core.datalib.MetDataSource method), 446
- listdir() (pycontrails.core.cache.CacheStore method), 434
- listdir() (pycontrails.core.cache.DiskCacheStore method), 437
- listdir() (pycontrails.core.cache.GCPCacheStore method), 441
- listdir() (pycontrails.DiskCacheStore method), 424
- listdir() (pycontrails.GCPCacheStore method), 429
- load() (pycontrails.core.met.MetdataArray class method), 487
- load() (pycontrails.core.met.MetDataset class method), 496
- load() (pycontrails.MetdataArray class method), 165
- load() (pycontrails.MetDataset class method), 158
- log\_applied (pycontrails.models.humidity\_scaling.HistogramMatchingParams attribute), 385
- log\_interp() (pycontrails.core.interpolation.EmissionsProfileInterpolator method), 478
- lon\_bound (pycontrails.models.accf.ACCFParams attribute), 341
- long\_name (pycontrails.core.met\_var.MetVariable attribute), 500
- long\_name (pycontrails.core.models.Model property), 502
- long\_name (pycontrails.ext.bada.BADA3 attribute), 542
- long\_name (pycontrails.ext.bada.BADA4 attribute), 546
- long\_name (pycontrails.ext.bada.BADAFlight attribute), 531
- long\_name (pycontrails.ext.bada.BADAGrid attribute), 535
- long\_name (pycontrails.Model property), 256
- long\_name (pycontrails.models.accf.ACCF attribute), 336
- long\_name (pycontrails.models.cocip.Cocip attribute), 277
- long\_name (pycontrails.models.cocipgrid.CocipGrid attribute), 325
- long\_name (pycontrails.models.emissions.Emissions attribute), 364

- long\_name (pycontrails.models.humidity\_scaling.ConstantHumidityScaling attribute), 376
- long\_name (pycontrails.models.humidity\_scaling.ExponentialBoostHumidityScaling attribute), 378
- long\_name (pycontrails.models.humidity\_scaling.ExponentialBoostHumidityScaling attribute), 380
- long\_name (pycontrails.models.humidity\_scaling.HistogramMatching attribute), 381
- long\_name (pycontrails.models.humidity\_scaling.HistogramMatchingWithEckert attribute), 383
- long\_name (pycontrails.models.humidity\_scaling.HumidityScaling attribute), 387
- long\_name (pycontrails.models.issr.ISSR attribute), 261
- long\_name (pycontrails.models.pcc.PCC attribute), 271
- long\_name (pycontrails.models.pcr.PCR attribute), 268
- long\_name (pycontrails.models.ps\_model.PSFlight attribute), 353
- long\_name (pycontrails.models.ps\_model.PSGrid attribute), 355
- long\_name (pycontrails.models.sac.SAC attribute), 264
- longitude\_distance\_to\_m() (in module pycontrails.physics.units), 418
- longitudinal\_angle() (in module pycontrails.physics.geo), 412
- longwave\_radiative\_forcing() (in module pycontrails.models.cocip.radiative\_forcing), 312
- M**
- M1 (pycontrails.datalib.goes.GOESRegion attribute), 251
- M2 (pycontrails.datalib.goes.GOESRegion attribute), 251
- M\_d (in module pycontrails.physics.constants), 391
- m\_des (pycontrails.models.ps\_model.PSAircraftEngineParams attribute), 360
- m\_ec (pycontrails.models.ps\_model.PSAircraftEngineParams attribute), 360
- m\_per\_s\_to\_knots() (in module pycontrails.physics.units), 419
- m\_to\_ft() (in module pycontrails.physics.units), 419
- m\_to\_latitude\_distance() (in module pycontrails.physics.units), 419
- m\_to\_longitude\_distance() (in module pycontrails.physics.units), 419
- m\_to\_pl() (in module pycontrails.physics.units), 420
- m\_to\_T\_isa() (in module pycontrails.physics.units), 419
- M\_v (in module pycontrails.physics.constants), 391
- mach\_number (pycontrails.core.aircraft\_performance.AircraftPerformance attribute), 347
- mach\_number\_to\_tas() (in module pycontrails.physics.units), 420
- manufacturer (pycontrails.models.ps\_model.PSAircraftEngineParams attribute), 360
- mars\_request() (pycontrails.datalib.ecmwf.era5\_model\_level.ERA5ModelLevel attribute), 376
- max\_altitude\_m (pycontrails.models.cocip.CocipParams attribute), 285
- max\_depth (pycontrails.models.cocip.CocipParams attribute), 285
- max\_distance\_gap (pycontrails.core.fleet.Fleet property), 452
- max\_distance\_gap (pycontrails.core.flight.Flight property), 464
- max\_distance\_gap (pycontrails.Fleet property), 205
- max\_distance\_gap (pycontrails.Flight property), 193
- max\_downward\_displacement() (in module pycontrails.models.cocip.wake\_vortex), 317
- max\_mach\_num (pycontrails.models.ps\_model.PSAircraftEngineParams attribute), 360
- max\_n\_ice\_per\_m3 (pycontrails.models.cocip.CocipParams attribute), 285
- MAX\_ON\_GROUND\_SPEED (in module pycontrails.core.flight), 472
- max\_seg\_length\_m (pycontrails.models.cocip.CocipParams attribute), 285
- max\_tau (pycontrails.models.cocip.CocipParams attribute), 285
- max\_time\_gap (pycontrails.core.flight.Flight property), 464
- max\_time\_gap (pycontrails.Flight property), 194
- mean\_energy\_flux\_per\_m() (in module pycontrails.models.cocip.contrail\_properties), 296
- mean\_radiative\_flux\_per\_m() (in module pycontrails.models.cocip.contrail\_properties), 296
- member (pycontrails.models.humidity\_scaling.HistogramMatchingParams attribute), 382
- member (pycontrails.models.humidity\_scaling.HistogramMatchingWithEckert attribute), 385
- merged (pycontrails.models.accf.ACCFParams attribute), 341
- met (pycontrails.core.aircraft\_performance.AircraftPerformance attribute), 344
- met (pycontrails.core.aircraft\_performance.AircraftPerformanceGrid attribute), 344

- attribute), 346
- met (*pycontrails.core.models.Model* attribute), 502
- met (*pycontrails.ext.bada.BADAFlight* attribute), 531
- met (*pycontrails.ext.bada.BADAGrid* attribute), 535
- met (*pycontrails.Model* attribute), 256
- met (*pycontrails.models.accf.ACCF* attribute), 336
- met (*pycontrails.models.emissions.Emissions* attribute), 364
- met (*pycontrails.models.humidity\_scaling.ConstantHumidityScaling* attribute), 376
- met (*pycontrails.models.humidity\_scaling.ExponentialBoosting* attribute), 378
- met (*pycontrails.models.humidity\_scaling.ExponentialBoosting* attribute), 380
- met (*pycontrails.models.humidity\_scaling.HistogramMatching* attribute), 381
- met (*pycontrails.models.humidity\_scaling.HistogramMatching* attribute), 383
- met (*pycontrails.models.humidity\_scaling.HumidityScaling* attribute), 385
- met (*pycontrails.models.humidity\_scaling.HumidityScalingByLevel* attribute), 387
- met (*pycontrails.models.issr.ISSR* attribute), 261
- met (*pycontrails.models.pcr.PCR* attribute), 268
- met (*pycontrails.models.ps\_model.PSFlight* attribute), 353
- met (*pycontrails.models.ps\_model.PSGrid* attribute), 355
- met (*pycontrails.models.sac.SAC* attribute), 264
- met\_latitude\_buffer (*pycontrails.core.models.ModelParams* attribute), 505
- met\_latitude\_buffer (*pycontrails.ModelParams* attribute), 259
- met\_latitude\_buffer (*pycontrails.models.cocip.CocipParams* attribute), 285
- met\_level\_buffer (*pycontrails.core.models.ModelParams* attribute), 505
- met\_level\_buffer (*pycontrails.ModelParams* attribute), 259
- met\_level\_buffer (*pycontrails.models.cocip.CocipParams* attribute), 285
- met\_longitude\_buffer (*pycontrails.core.models.ModelParams* attribute), 505
- met\_longitude\_buffer (*pycontrails.ModelParams* attribute), 259
- met\_longitude\_buffer (*pycontrails.models.cocip.CocipParams* attribute), 285
- met\_required (*pycontrails.core.models.Model* attribute), 502
- met\_required (*pycontrails.Model* attribute), 256
- met\_required (*pycontrails.models.cocip.Cocip* attribute), 277
- met\_required (*pycontrails.models.cocipgrid.CocipGrid* attribute), 325
- met\_time\_buffer (*pycontrails.core.models.ModelParams* attribute), 505
- met\_time\_buffer (*pycontrails.ModelParams* attribute), 259
- met\_variables (*pycontrails.core.models.Model* attribute), 503
- met\_variables (*pycontrails.ext.bada.BADAFlight* attribute), 531
- met\_variables (*pycontrails.ext.bada.BADAGrid* attribute), 535
- met\_variables (*pycontrails.Model* attribute), 256
- met\_variables (*pycontrails.models.accf.ACCF* attribute), 336
- met\_variables (*pycontrails.models.cocip.Cocip* attribute), 277
- met\_variables (*pycontrails.models.cocipgrid.CocipGrid* attribute), 325
- met\_variables (*pycontrails.models.emissions.Emissions* attribute), 364
- met\_variables (*pycontrails.models.issr.ISSR* attribute), 261
- met\_variables (*pycontrails.models.pcc.PCC* attribute), 271
- met\_variables (*pycontrails.models.pcr.PCR* attribute), 268
- met\_variables (*pycontrails.models.ps\_model.PSFlight* attribute), 353
- met\_variables (*pycontrails.models.ps\_model.PSGrid* attribute), 355
- met\_variables (*pycontrails.models.sac.SAC* attribute), 264
- MetBase (class in *pycontrails.core.met*), 480
- MetdataArray (class in *pycontrails*), 160
- MetdataArray (class in *pycontrails.core.met*), 483
- MetDataset (class in *pycontrails*), 153
- MetDataset (class in *pycontrails.core.met*), 492
- MetDataSource (class in *pycontrails.core.datalib*), 445
- MetVariable (class in *pycontrails.core.met\_var*), 499
- mid\_troposphere\_threshold (*pycontrails.models.humidity\_scaling.HumidityScalingByLevelParams* attribute), 388
- min\_altitude\_m (*pycontrails.models.cocip.CocipParams* attribute), 285
- MIN\_CRUISE\_ALTITUDE (in module *pycontrails.core.flight*), 472

- min\_ice\_particle\_number\_nvpm\_ei\_n (*pycontrails.models.cocip.CocipParams* attribute), 286
  - min\_n\_ice\_per\_m3 (*pycontrails.models.cocip.CocipParams* attribute), 286
  - min\_tau (*pycontrails.models.cocip.CocipParams* attribute), 286
  - Model (class in *pycontrails*), 254
  - Model (class in *pycontrails.core.models*), 501
  - ModelInput (in module *pycontrails.core.models*), 504
  - ModelOutput (in module *pycontrails.core.models*), 504
  - ModelParams (class in *pycontrails*), 258
  - ModelParams (class in *pycontrails.core.models*), 504
  - module
    - pycontrails.core.aircraft\_performance*, 342
    - pycontrails.core.airports*, 431
    - pycontrails.core.cache*, 433
    - pycontrails.core.coordinates*, 442
    - pycontrails.core.datalib*, 444
    - pycontrails.core.fleet*, 450
    - pycontrails.core.flight*, 457
    - pycontrails.core.fuel*, 474
    - pycontrails.core.interpolation*, 477
    - pycontrails.core.met*, 480
    - pycontrails.core.met\_var*, 499
    - pycontrails.core.models*, 500
    - pycontrails.core.polygon*, 507
    - pycontrails.core.vector*, 509
    - pycontrails.datalib.ecmwf.arco\_era5*, 243
    - pycontrails.datalib.ecmwf.era5\_model\_level*, 221
    - pycontrails.datalib.ecmwf.hres\_model\_level*, 230
    - pycontrails.datalib.ecmwf.model\_levels*, 234
    - pycontrails.datalib.ecmwf.variables*, 238
    - pycontrails.datalib.gfs.variables*, 243
    - pycontrails.datalib.goes*, 247
    - pycontrails.ext.bada.bada\_model*, 527
    - pycontrails.models.cocip.contrail\_properties*, 287
    - pycontrails.models.cocip.radiative\_forcing*, 304
    - pycontrails.models.cocip.wake\_vortex*, 314
    - pycontrails.models.cocip.wind\_shear*, 320
    - pycontrails.models.emissions.black\_carbon*, 365
    - pycontrails.models.emissions.ffm2*, 372
    - pycontrails.models.humidity\_scaling*, 376
    - pycontrails.models.issr*, 260
    - pycontrails.models.pcc*, 269
    - pycontrails.models.pcr*, 267
    - pycontrails.models.sac*, 263
    - pycontrails.models.tau\_cirrus*, 374
    - pycontrails.physics.constants*, 390
    - pycontrails.physics.geo*, 407
    - pycontrails.physics.jet*, 398
    - pycontrails.physics.thermo*, 393
    - pycontrails.physics.units*, 416
    - pycontrails.utils.iteration*, 524
    - pycontrails.utils.json*, 525
    - pycontrails.utils.temp*, 525
    - pycontrails.utils.types*, 522
  - mu\_ice (in module *pycontrails.physics.constants*), 392
  - multipolygon\_to\_geojson() (in module *pycontrails.core.polygon*), 508
- ## N
- n\_engine (*pycontrails.models.ps\_model.PSAircraftEngineParams* attribute), 360
  - n\_flights (*pycontrails.core.fleet.Fleet* property), 452
  - n\_flights (*pycontrails.Fleet* property), 205
  - n\_iter (*pycontrails.core.aircraft\_performance.AircraftPerformanceParams* attribute), 348
  - n\_members (*pycontrails.models.humidity\_scaling.HistogramMatchingWithEckel* attribute), 383
  - name (*pycontrails.core.met.MetDataArray* property), 487
  - name (*pycontrails.core.models.Model* property), 503
  - name (*pycontrails.ext.bada.BADA3* attribute), 542
  - name (*pycontrails.ext.bada.BADA4* attribute), 546
  - name (*pycontrails.ext.bada.BADAFlight* attribute), 531
  - name (*pycontrails.ext.bada.BADAGrid* attribute), 535
  - name (*pycontrails.MetDataArray* property), 165
  - name (*pycontrails.Model* property), 256
  - name (*pycontrails.models.accf.ACCF* attribute), 337
  - name (*pycontrails.models.cocip.Cocip* attribute), 278
  - name (*pycontrails.models.cocipgrid.CocipGrid* attribute), 326
  - name (*pycontrails.models.emissions.Emissions* attribute), 364
  - name (*pycontrails.models.humidity\_scaling.ConstantHumidityScaling* attribute), 376
  - name (*pycontrails.models.humidity\_scaling.ExponentialBoostHumidityScaling* attribute), 378
  - name (*pycontrails.models.humidity\_scaling.ExponentialBoostLatitudeCorrection* attribute), 380
  - name (*pycontrails.models.humidity\_scaling.HistogramMatching* attribute), 381
  - name (*pycontrails.models.humidity\_scaling.HistogramMatchingWithEckel* attribute), 383
  - name (*pycontrails.models.humidity\_scaling.HumidityScalingByLevel* attribute), 387
  - name (*pycontrails.models.issr.ISSR* attribute), 261
  - name (*pycontrails.models.pcc.PCC* attribute), 271
  - name (*pycontrails.models.pcr.PCR* attribute), 268

- name (*pycontrails.models.ps\_model.PSFlight* attribute), 353
- name (*pycontrails.models.ps\_model.PSGrid* attribute), 355
- name (*pycontrails.models.sac.SAC* attribute), 264
- NAN (*pycontrails.core.flight.FlightPhase* attribute), 471
- NAN (*pycontrails.FlightPhase* attribute), 210
- net\_radiative\_forcing() (in module *pycontrails.models.cocip.radiative\_forcing*), 313
- NETCDF\_ENGINE (in module *pycontrails.core.datalib*), 448
- new\_contrail\_dimensions() (in module *pycontrails.models.cocip.contrail\_properties*), 297
- new\_effective\_area\_from\_sigma() (in module *pycontrails.models.cocip.contrail\_properties*), 297
- new\_ice\_particle\_number() (in module *pycontrails.models.cocip.contrail\_properties*), 297
- new\_ice\_water\_content() (in module *pycontrails.models.cocip.contrail\_properties*), 298
- nitrogen\_oxide\_emissions\_index\_profile() (in module *pycontrails.models.emissions.ffm2*), 373
- nominal\_bpr (*pycontrails.models.ps\_model.PSAircraftEngineParams* attribute), 360
- nominal\_fpr (*pycontrails.models.ps\_model.PSAircraftEngineParams* attribute), 360
- nominal\_opr (*pycontrails.models.ps\_model.PSAircraftEngineParams* attribute), 360
- nominal\_rocd (in module *pycontrails.physics.constants*), 392
- norm\_distances (in module *pycontrails.core.interpolation.RGIArtifacts* attribute), 479
- normalized\_dissipation\_rate() (in module *pycontrails.models.cocip.wake\_vortex*), 318
- nox\_ei (*pycontrails.models.accf.ACCFParams* attribute), 341
- number\_emissions\_index\_fractal\_aggregates() (in module *pycontrails.models.emissions.black\_carbon*), 370
- NumpyEncoder (class in *pycontrails.utils.json*), 526
- nvpm\_ei\_n\_enhancement\_factor (*pycontrails.models.cocip.CocipParams* attribute), 286
- nvpm\_mass\_ei\_pct\_reduction\_due\_to\_saf() (in module *pycontrails.models.emissions.black\_carbon*), 370
- nvpm\_number\_ei\_pct\_reduction\_due\_to\_saf() (in module *pycontrails.models.emissions.black\_carbon*), 371
- O
- o3\_scaling (*pycontrails.models.accf.ACCFParams* attribute), 341
- olr\_reduction\_natural\_cirrus() (in module *pycontrails.models.cocip.radiative\_forcing*), 313
- open\_arco\_era5\_model\_level\_data() (in module *pycontrails.datalib.ecmwf.arco\_era5*), 246
- open\_arco\_era5\_single\_level() (in module *pycontrails.datalib.ecmwf.arco\_era5*), 247
- open\_dataset() (in module *pycontrails.core.datalib.MetaDataSource* method), 446
- OPEN\_IN\_PARALLEL (in module *pycontrails.core.datalib*), 448
- open\_metdataset() (in module *pycontrails.core.datalib.MetaDataSource* method), 447
- open\_metdataset() (in module *pycontrails.datalib.ecmwf.arco\_era5.ARCOERA5* method), 245
- open\_metdataset() (in module *pycontrails.datalib.ecmwf.ERA5* method), 220
- open\_metdataset() (in module *pycontrails.datalib.ecmwf.era5\_model\_level.ERA5ModelLevel* method), 223
- open\_metdataset() (in module *pycontrails.datalib.ecmwf.HRES* method), 228
- open\_metdataset() (in module *pycontrails.datalib.ecmwf.hres\_model\_level.HRESModelLevel* method), 232
- open\_metdataset() (in module *pycontrails.datalib.ecmwf.IFS* method), 237
- open\_metdataset() (in module *pycontrails.datalib.gfs.GFSForecast* method), 242
- OPEN\_WITH\_LOCK (in module *pycontrails.core.datalib*), 448
- optional\_met\_variables (in module *pycontrails.core.models.Model* attribute), 503
- optional\_met\_variables (in module *pycontrails.ext.bada.BADAFlight* attribute), 531
- optional\_met\_variables (in module *pycontrails.ext.bada.BADAGrid* attribute), 535
- optional\_met\_variables (in module *pycontrails.Model* attribute), 256
- optional\_met\_variables (in module *pycontrails.models.cocip.Cocip* attribute), 278
- optional\_met\_variables (in module *pycontrails.models.ps\_model.PSFlight* attribute), 353
- orbital\_correction\_for\_solar\_hour\_angle() (in module *pycontrails.physics.geo*), 412
- orbital\_position() (in module *pycontrails.physics.geo*), 412

- originates\_from\_ecmwf() (in module *pycontrails.core.met*), 498  
 OURAIRPORTS\_DATABASE\_URL (in module *pycontrails.core.airports*), 431  
 out\_of\_bounds (in module *pycontrails.core.interpolation.RGIArtifacts* attribute), 479  
 overall\_propulsion\_efficiency() (in module *pycontrails.physics.jet*), 403
- ## P
- p\_i\_max (in module *pycontrails.models.ps\_model.PSAircraftEngineParams* attribute), 360  
 p\_inf\_co (in module *pycontrails.models.ps\_model.PSAircraftEngineParams* attribute), 360  
 p\_surface (in module *pycontrails.physics.constants*), 392  
 p\_vapor() (in module *pycontrails.physics.thermo*), 395  
 params (in module *pycontrails.core.aircraft\_performance.AircraftPerformance* attribute), 344  
 params (in module *pycontrails.core.aircraft\_performance.AircraftPerformance* attribute), 346  
 params (in module *pycontrails.core.models.Model* attribute), 503  
 params (in module *pycontrails.ext.bada.BADAFlight* attribute), 531  
 params (in module *pycontrails.ext.bada.BADAGrid* attribute), 536  
 params (in module *pycontrails.Model* attribute), 256  
 params (in module *pycontrails.models.accf.ACCF* attribute), 338  
 params (in module *pycontrails.models.emissions.Emissions* attribute), 364  
 params (in module *pycontrails.models.humidity\_scaling.ConstantHumidityScaling* attribute), 376  
 params (in module *pycontrails.models.humidity\_scaling.ExponentialBoostHumidityScaling* attribute), 378  
 params (in module *pycontrails.models.humidity\_scaling.ExponentialBoostLatitudeCorrectionHumidityScaling* attribute), 381  
 params (in module *pycontrails.models.humidity\_scaling.HistogramMatching* attribute), 381  
 params (in module *pycontrails.models.humidity\_scaling.HistogramMatchingWithEckert* attribute), 383  
 params (in module *pycontrails.models.humidity\_scaling.HumidityScaling* attribute), 385  
 params (in module *pycontrails.models.humidity\_scaling.HumidityScalingByLevel* attribute), 387  
 params (in module *pycontrails.models.issr.ISSR* attribute), 262  
 params (in module *pycontrails.models.pcr.PCR* attribute), 268  
 params (in module *pycontrails.models.ps\_model.PSFlight* attribute), 353  
 params (in module *pycontrails.models.ps\_model.PSGrid* attribute), 355  
 params (in module *pycontrails.models.sac.SAC* attribute), 264  
 parse\_grid() (in module *pycontrails.core.datalib*), 448  
 parse\_pressure\_levels() (in module *pycontrails.core.datalib*), 448  
 parse\_timesteps() (in module *pycontrails.core.datalib*), 449  
 parse\_variables() (in module *pycontrails.core.datalib*), 449  
 particle\_losses\_aggregation() (in module *pycontrails.models.cocip.contrail\_properties*), 298  
 particle\_losses\_turbulence() (in module *pycontrails.models.cocip.contrail\_properties*), 299  
 path (in module *pycontrails.ext.bada.BADA3* attribute), 542  
 path (in module *pycontrails.ext.bada.BADA4* attribute), 546  
 path() (in module *pycontrails.core.cache.CacheStore* method), 434  
 path() (in module *pycontrails.core.cache.DiskCacheStore* method), 437  
 path() (in module *pycontrails.core.cache.GPCCacheStore* method), 441  
 path() (in module *pycontrails.DiskCacheStore* method), 424  
 path() (in module *pycontrails.GPCCacheStore* method), 429  
 path\_lib (in module *pycontrails.models.accf.ACCF* attribute), 338  
 paths (in module *pycontrails.core.datalib.MetDataSource* attribute), 447  
 paths (in module *pycontrails.datalib.ecmwf.arco\_era5.ARCOERA5* attribute), 245  
 paths (in module *pycontrails.datalib.ecmwf.era5\_model\_level.ERA5ModelLevel* attribute), 223  
 paths (in module *pycontrails.datalib.ecmwf.hres\_model\_level.HRESModelLevel* attribute), 232  
 PCC (class in *pycontrails.models.pcc*), 269  
 PCCParams (class in *pycontrails.models.pcc*), 272  
 PCR (class in *pycontrails.models.pcr*), 267  
 pcr() (in module *pycontrails.models.pcr*), 268  
 PCRParams (class in *pycontrails.models.pcr*), 268  
 persistent\_buffer (in module *pycontrails.models.cocip.CocipParams* attribute), 300  
 pfca (in module *pycontrails.models.accf.ACCFParams* attribute), 341  
 pl\_to\_ft() (in module *pycontrails.physics.units*), 420  
 pl\_to\_m() (in module *pycontrails.physics.units*), 421  
 plot() (in module *pycontrails.core.flight.Flight* method), 465  
 plot() (in module *pycontrails.Flight* method), 194  
 plume\_effective\_cross\_sectional\_area() (in module *pycontrails.models.cocip.contrail\_properties*), 300  
 plume\_effective\_depth() (in module *pycontrails.models.cocip.contrail\_properties*), 300  
 plume\_mass\_per\_distance() (in module *pycontrails.models.cocip.contrail\_properties*), 300  
 plume\_temporal\_evolution() (in module *pycontrails.models.cocip.contrail\_properties*), 300  
 PMO (in module *pycontrails.models.accf.ACCFParams* attribute), 340  
 pressure\_dz() (in module *pycontrails.physics.thermo*),



- 395
- pressure\_level\_variables (pycontrails.core.datalib.MetDataSource property), 447
- pressure\_level\_variables (pycontrails.datalib.ecmwf.arco\_era5.ARCOERA5 property), 245
- pressure\_level\_variables (pycontrails.datalib.ecmwf.ERA5 property), 220
- pressure\_level\_variables (pycontrails.datalib.ecmwf.era5\_model\_level.ERA5ModelLevel property), 223
- pressure\_level\_variables (pycontrails.datalib.ecmwf.HRES property), 229
- pressure\_level\_variables (pycontrails.datalib.ecmwf.hres\_model\_level.HRESModelLevel property), 232
- pressure\_level\_variables (pycontrails.datalib.gfs.GFSForecast property), 242
- pressure\_levels (pycontrails.core.datalib.MetDataSource attribute), 447
- pressure\_levels (pycontrails.datalib.ecmwf.arco\_era5.ARCOERA5 attribute), 245
- pressure\_levels (pycontrails.datalib.ecmwf.era5\_model\_level.ERA5ModelLevel attribute), 223
- pressure\_levels (pycontrails.datalib.ecmwf.hres\_model\_level.HRESModelLevel attribute), 233
- pressure\_levels\_at\_model\_levels() (in module pycontrails.datalib.ecmwf.model\_levels), 234
- pressure\_ratio() (in module pycontrails.physics.jet), 404
- process\_emissions (pycontrails.models.cocip.CocipParams attribute), 286
- processed\_met\_variables (pycontrails.core.models.Model attribute), 503
- processed\_met\_variables (pycontrails.Model attribute), 256
- processed\_met\_variables (pycontrails.models.cocip.Cocip attribute), 278
- processed\_met\_variables (pycontrails.models.cocipgrid.CocipGrid attribute), 326
- product\_attr (pycontrails.core.met.MetDataset property), 496
- product\_attr (pycontrails.MetDataset property), 158
- product\_type (pycontrails.datalib.ecmwf.ERA5 attribute), 220
- product\_type (pycontrails.models.humidity\_scaling.HistogramMatchingParams attribute), 383
- project (pycontrails.core.cache.GPCCacheStore attribute), 441
- project (pycontrails.GPCCacheStore attribute), 430
- proportion (pycontrails.core.met.MetdataArray property), 488
- proportion (pycontrails.MetdataArray property), 166
- proportion\_met() (pycontrails.core.flight.Flight method), 465
- proportion\_met() (pycontrails.Flight method), 194
- provider\_attr (pycontrails.core.met.MetDataset property), 496
- provider\_attr (pycontrails.MetDataset property), 158
- ps\_nominal\_grid() (in module pycontrails.models.ps\_model), 361
- PSAircraftEngineParams (class in pycontrails.models.ps\_model), 355
- PSFlight (class in pycontrails.models.ps\_model), 350
- PSFlightParams (class in pycontrails.models.ps\_model), 348
- PSGrid (class in pycontrails.models.ps\_model), 353
- psi\_0 (pycontrails.models.ps\_model.PSAircraftEngineParams attribute), 360
- ptf\_params\_dict (pycontrails.ext.bada.BADA3 attribute), 542
- ptf\_params\_dict (pycontrails.ext.bada.BADA4 attribute), 546
- put() (pycontrails.core.cache.CacheStore method), 434
- put() (pycontrails.core.cache.DiskCacheStore method), 437
- put() (pycontrails.core.cache.GPCCacheStore method), 441
- put() (pycontrails.DiskCacheStore method), 425
- put() (pycontrails.GPCCacheStore method), 430
- put\_multiple() (pycontrails.core.cache.CacheStore method), 434
- pycontrails.core.aircraft\_performance module, 342
- pycontrails.core.airports module, 431
- pycontrails.core.cache module, 433
- pycontrails.core.coordinates module, 442
- pycontrails.core.datalib module, 444
- pycontrails.core.fleet module, 450
- pycontrails.core.flight module, 457
- pycontrails.core.fuel module, 474
- pycontrails.core.interpolation

module, 477  
 pycontrails.core.met  
   module, 480  
 pycontrails.core.met\_var  
   module, 499  
 pycontrails.core.models  
   module, 500  
 pycontrails.core.polygon  
   module, 507  
 pycontrails.core.vector  
   module, 509  
 pycontrails.datalib.ecmwf.arco\_era5  
   module, 243  
 pycontrails.datalib.ecmwf.era5\_model\_level  
   module, 221  
 pycontrails.datalib.ecmwf.hres\_model\_level  
   module, 230  
 pycontrails.datalib.ecmwf.model\_levels  
   module, 234  
 pycontrails.datalib.ecmwf.variables  
   module, 238  
 pycontrails.datalib.gfs.variables  
   module, 243  
 pycontrails.datalib.goes  
   module, 247  
 pycontrails.ext.bada.bada\_model  
   module, 527  
 pycontrails.models.cocip.contrail\_properties  
   module, 287  
 pycontrails.models.cocip.radiative\_forcing  
   module, 304  
 pycontrails.models.cocip.wake\_vortex  
   module, 314  
 pycontrails.models.cocip.wind\_shear  
   module, 320  
 pycontrails.models.emissions.black\_carbon  
   module, 365  
 pycontrails.models.emissions.ffm2  
   module, 372  
 pycontrails.models.humidity\_scaling  
   module, 376  
 pycontrails.models.issr  
   module, 260  
 pycontrails.models.pcc  
   module, 269  
 pycontrails.models.pcr  
   module, 267  
 pycontrails.models.sac  
   module, 263  
 pycontrails.models.tau\_cirrus  
   module, 374  
 pycontrails.physics.constants  
   module, 390  
 pycontrails.physics.geo

module, 407  
 pycontrails.physics.jet  
   module, 398  
 pycontrails.physics.thermo  
   module, 393  
 pycontrails.physics.units  
   module, 416  
 pycontrails.utils.iteration  
   module, 524  
 pycontrails.utils.json  
   module, 525  
 pycontrails.utils.temp  
   module, 525  
 pycontrails.utils.types  
   module, 522  
 PycontrailsRegularGridInterpolator (*class in py-*  
*contrails.core.interpolation*), 478

## Q

q\_exhaust() (in module *pycon-*  
*trails.models.cocip.contrail\_properties*),  
 301  
 q\_fuel (*pycontrails.core.fuel.Fuel* attribute), 474  
 q\_fuel (*pycontrails.core.fuel.HydrogenFuel* attribute),  
 475  
 q\_fuel (*pycontrails.core.fuel.JetA* attribute), 476  
 q\_fuel (*pycontrails.core.fuel.SAFBlend* attribute), 476  
 q\_fuel (*pycontrails.Fuel* attribute), 212  
 q\_fuel (*pycontrails.HydrogenFuel* attribute), 216  
 q\_fuel (*pycontrails.JetA* attribute), 213  
 q\_sat() (in module *pycontrails.physics.thermo*), 396  
 q\_sat\_ice() (in module *pycontrails.physics.thermo*),  
 396  
 q\_sat\_liquid() (in module *pycon-*  
*trails.physics.thermo*), 396

## R

R (in module *pycontrails.physics.constants*), 391  
 R\_d (in module *pycontrails.physics.constants*), 391  
 R\_v (in module *pycontrails.physics.constants*), 391  
 rad (*pycontrails.models.cocip.Cocip* attribute), 279  
 rad (*pycontrails.models.cocipgrid.CocipGrid* attribute),  
 327  
 rad\_variables (*pycontrails.models.cocip.Cocip* at-  
 tribute), 279  
 rad\_variables (pycon-  
*trails.models.cocipgrid.CocipGrid* attribute),  
 327  
 radians\_to\_degrees() (in module *pycon-*  
*trails.physics.units*), 421  
 radiative\_heating\_effects (pycon-  
*trails.models.cocip.CocipParams* attribute),  
 286

- radius\_earth (in module *pycontrails.physics.constants*), 392
- radius\_threshold\_um (pycontrails.models.cocip.CocipParams attribute), 286
- raise\_invalid\_q\_method\_error() (in module *pycontrails.core.models*), 506
- read\_only (pycontrails.core.cache.GCPCacheStore attribute), 442
- read\_only (pycontrails.GCPCacheStore attribute), 430
- remove\_tempfile() (in module *pycontrails.utils.temp*), 525
- require\_met() (pycontrails.core.models.Model method), 503
- require\_met() (pycontrails.Model method), 256
- require\_source\_type() (pycontrails.core.models.Model method), 503
- require\_source\_type() (pycontrails.Model method), 256
- required\_keys (pycontrails.core.vector.GeoVectorDataset attribute), 513
- required\_keys (pycontrails.GeoVectorDataset attribute), 183
- resample\_and\_fill() (pycontrails.core.fleet.Fleet method), 452
- resample\_and\_fill() (pycontrails.core.flight.Flight method), 465
- resample\_and\_fill() (pycontrails.Fleet method), 205
- resample\_and\_fill() (pycontrails.Flight method), 194
- reserve\_fuel\_requirements() (in module *pycontrails.physics.jet*), 404
- rf\_lw\_enhancement\_factor (pycontrails.models.cocip.CocipParams attribute), 286
- rf\_sw\_enhancement\_factor (pycontrails.models.cocip.CocipParams attribute), 286
- RFConstants (class in *pycontrails.models.cocip.radiative\_forcing*), 305
- RGIArtifacts (class in *pycontrails.core.interpolation*), 479
- rh() (in module *pycontrails.physics.thermo*), 397
- rh\_crit\_factor (pycontrails.models.pcc.PCCParams attribute), 272
- rh\_critical\_sac() (in module *pycontrails.models.sac*), 266
- rhi() (in module *pycontrails.physics.thermo*), 397
- rhi\_adj (pycontrails.models.humidity\_scaling.ConstantHumidityScalingParams attribute), 377
- rhi\_adj\_mid\_troposphere (pycontrails.models.humidity\_scaling.HumidityScalingByLevelParams attribute), 388
- rhi\_adj\_stratosphere (pycontrails.models.humidity\_scaling.HumidityScalingByLevelParams attribute), 388
- rhi\_boost\_exponent (pycontrails.models.humidity\_scaling.ExponentialBoostHumidityScaling attribute), 379
- rhi\_threshold (pycontrails.models.issr.ISSRParams attribute), 262
- rho\_d() (in module *pycontrails.physics.thermo*), 397
- rho\_ice (in module *pycontrails.physics.constants*), 392
- rho\_msl (in module *pycontrails.physics.constants*), 393
- rho\_v() (in module *pycontrails.physics.thermo*), 397
- rocd (pycontrails.core.aircraft\_performance.AircraftPerformanceData attribute), 345
- round\_hour() (in module *pycontrails.core.datalib*), 449
- ## S
- SAC (class in *pycontrails.models.sac*), 263
- sac() (in module *pycontrails.models.sac*), 266
- sac\_ei\_h2o (pycontrails.models.accf.ACCEParams attribute), 341
- sac\_eta (pycontrails.models.accf.ACCEParams attribute), 341
- sac\_q (pycontrails.models.accf.ACCEParams attribute), 341
- SACParams (class in *pycontrails.models.sac*), 264
- SAFBlend (class in *pycontrails*), 214
- SAFBlend (class in *pycontrails.core.fuel*), 476
- save() (pycontrails.core.met.MetdataArray method), 488
- save() (pycontrails.core.met.MetDataset method), 496
- save() (pycontrails.MetdataArray method), 166
- save() (pycontrails.MetDataset method), 159
- scale() (pycontrails.models.humidity\_scaling.ConstantHumidityScaling method), 376
- scale() (pycontrails.models.humidity\_scaling.ExponentialBoostHumidityScaling method), 378
- scale() (pycontrails.models.humidity\_scaling.ExponentialBoostLatitudeC method), 381
- scale() (pycontrails.models.humidity\_scaling.HistogramMatching method), 381
- scale() (pycontrails.models.humidity\_scaling.HistogramMatchingWithEck method), 383
- scale() (pycontrails.models.humidity\_scaling.HumidityScaling method), 385
- scale() (pycontrails.models.humidity\_scaling.HumidityScalingByLevel method), 387
- scaler\_specific\_keys (pycontrails.models.humidity\_scaling.ConstantHumidityScaling attribute), 377
- scaler\_specific\_keys (pycontrails.models.humidity\_scaling.ExponentialBoostHumidityScaling attribute), 378

*scaler\_specific\_keys* (*pycontrails.models.humidity\_scaling.ExponentialBoostScaler* attribute), 334  
*scaler\_specific\_keys* (*pycontrails.models.humidity\_scaling.HumidityScaling* attribute), 381  
*scaler\_specific\_keys* (*pycontrails.models.humidity\_scaling.HumidityScalingBoostScaler* attribute), 387  
*scattering\_extinction\_efficiency()* (in module *pycontrails.models.cocip.contrail\_properties*), 302  
*seconds\_per\_year* (in module *pycontrails.physics.constants*), 393  
*sedimentation\_impact\_factor* (*pycontrails.models.cocip.CocipParams* attribute), 286  
*segment\_angle()* (in module *pycontrails.physics.geo*), 412  
*segment\_angle()* (*pycontrails.core.fleet.Fleet* method), 454  
*segment\_angle()* (*pycontrails.core.flight.Flight* method), 466  
*segment\_angle()* (*pycontrails.Fleet* method), 207  
*segment\_angle()* (*pycontrails.Flight* method), 196  
*segment\_azimuth()* (in module *pycontrails.physics.geo*), 413  
*segment\_azimuth()* (*pycontrails.core.fleet.Fleet* method), 455  
*segment\_azimuth()* (*pycontrails.core.flight.Flight* method), 467  
*segment\_azimuth()* (*pycontrails.Fleet* method), 208  
*segment\_azimuth()* (*pycontrails.Flight* method), 197  
*segment\_duration()* (in module *pycontrails.core.flight*), 472  
*segment\_duration()* (*pycontrails.core.flight.Flight* method), 468  
*segment\_duration()* (*pycontrails.Flight* method), 197  
*segment\_groundspeed()* (*pycontrails.core.fleet.Fleet* method), 455  
*segment\_groundspeed()* (*pycontrails.core.flight.Flight* method), 468  
*segment\_groundspeed()* (*pycontrails.Fleet* method), 208  
*segment\_groundspeed()* (*pycontrails.Flight* method), 197  
*segment\_haversine()* (in module *pycontrails.physics.geo*), 413  
*segment\_haversine()* (*pycontrails.core.flight.Flight* method), 468  
*segment\_haversine()* (*pycontrails.Flight* method), 197  
*segment\_length* (*pycontrails.models.cocipgrid.CocipGridParams* attribute), 334  
*segment\_length()* (*pycontrails.core.fleet.Fleet* method), 455  
*segment\_length()* (*pycontrails.core.flight.Flight* method), 469  
*segment\_length()* (*pycontrails.Fleet* method), 208  
*segment\_length()* (*pycontrails.Flight* method), 198  
*segment\_length\_ratio()* (in module *pycontrails.models.cocip.contrail\_properties*), 302  
*segment\_mach\_number()* (*pycontrails.core.flight.Flight* method), 469  
*segment\_mach\_number()* (*pycontrails.Flight* method), 199  
*segment\_phase()* (in module *pycontrails.core.flight*), 472  
*segment\_phase()* (*pycontrails.core.flight.Flight* method), 469  
*segment\_phase()* (*pycontrails.Flight* method), 199  
*segment\_rocd()* (in module *pycontrails.core.flight*), 473  
*segment\_rocd()* (*pycontrails.core.flight.Flight* method), 470  
*segment\_rocd()* (*pycontrails.Flight* method), 199  
*segment\_true\_airspeed()* (*pycontrails.core.fleet.Fleet* method), 456  
*segment\_true\_airspeed()* (*pycontrails.core.flight.Flight* method), 470  
*segment\_true\_airspeed()* (*pycontrails.Fleet* method), 209  
*segment\_true\_airspeed()* (*pycontrails.Flight* method), 199  
*select()* (*pycontrails.core.vector.VectorDataset* method), 518  
*select()* (*pycontrails.VectorDataset* method), 174  
*sep\_ri\_rw* (*pycontrails.models.accf.ACCFParams* attribute), 341  
*server* (*pycontrails.datalib.ecmwf.HRES* attribute), 229  
*set\_metadata()* (*pycontrails.core.datalib.MetaDataSource* method), 447  
*set\_metadata()* (*pycontrails.datalib.ecmwf.arco\_era5.ARCOERA5* method), 246  
*set\_metadata()* (*pycontrails.datalib.ecmwf.ERA5* method), 220  
*set\_metadata()* (*pycontrails.datalib.ecmwf.era5\_model\_level.ERA5ModelLevel* method), 224  
*set\_metadata()* (*pycontrails.datalib.ecmwf.HRES* method), 229  
*set\_metadata()* (*pycontrails.datalib.ecmwf.hres\_model\_level.HRESModelLevel* method), 229

- method), 233
- set\_metadata() (pycontrails.datalib.ecmwf.IFS method), 237
- set\_metadata() (pycontrails.datalib.gfs.GFSForecast method), 242
- set\_source() (pycontrails.core.models.Model method), 503
- set\_source() (pycontrails.Model method), 257
- set\_source\_met() (pycontrails.core.models.Model method), 503
- set\_source\_met() (pycontrails.Model method), 257
- setdefault() (pycontrails.core.vector.AttrDict method), 509
- setdefault() (pycontrails.core.vector.VectorDataDict method), 514
- setdefault() (pycontrails.core.vector.VectorDataset method), 518
- setdefault() (pycontrails.VectorDataset method), 175
- shape (pycontrails.core.met.MetBase property), 483
- shape (pycontrails.core.met.MetDataArray property), 488
- shape (pycontrails.core.met.MetDataset property), 496
- shape (pycontrails.core.vector.VectorDataset property), 518
- shape (pycontrails.MetDataArray property), 166
- shape (pycontrails.MetDataset property), 159
- shape (pycontrails.VectorDataset property), 175
- shift\_longitude() (in module pycontrails.core.met), 498
- SHORT\_HAUL\_DURATION (in module pycontrails.core.flight), 472
- short\_name (pycontrails.core.met\_var.MetVariable attribute), 500
- short\_vars (pycontrails.models.accf.ACCF attribute), 338
- shortwave\_radiative\_forcing() (in module pycontrails.models.cocip.radiative\_forcing), 313
- show\_progress (pycontrails.core.cache.GCPCacheStore attribute), 442
- show\_progress (pycontrails.datalib.gfs.GFSForecast attribute), 242
- show\_progress (pycontrails.GCPCacheStore attribute), 430
- show\_progress (pycontrails.models.cocipgrid.CocipGridParams attribute), 334
- simulate\_fuel\_and\_performance() (pycontrails.core.aircraft\_performance.AircraftPerformance method), 344
- single\_level\_variables (pycontrails.core.datalib.MetDataSource property), 447
- single\_level\_variables (pycontrails.datalib.ecmwf.arco\_era5.ARCOERA5 property), 246
- single\_level\_variables (pycontrails.datalib.ecmwf.ERA5 property), 220
- single\_level\_variables (pycontrails.datalib.ecmwf.era5\_model\_level.ERA5ModelLevel property), 224
- single\_level\_variables (pycontrails.datalib.ecmwf.HRES property), 229
- single\_level\_variables (pycontrails.datalib.ecmwf.hres\_model\_level.HRESModelLevel property), 233
- single\_level\_variables (pycontrails.datalib.gfs.GFSForecast property), 242
- size (pycontrails.core.cache.CacheStore property), 434
- size (pycontrails.core.cache.DiskCacheStore property), 438
- size (pycontrails.core.cache.GCPCacheStore property), 442
- size (pycontrails.core.met.MetBase property), 483
- size (pycontrails.core.met.MetDataArray property), 488
- size (pycontrails.core.met.MetDataset property), 496
- size (pycontrails.core.vector.VectorDataset property), 519
- size (pycontrails.DiskCacheStore property), 425
- size (pycontrails.GCPCacheStore property), 430
- size (pycontrails.MetDataArray property), 166
- size (pycontrails.MetDataset property), 159
- size (pycontrails.VectorDataset property), 175
- slice\_domain() (in module pycontrails.core.coordinates), 443
- Slingo1980() (pycontrails.models.pcc.PCC method), 270
- slope\_mixing\_line() (in module pycontrails.models.sac), 266
- Smith1990() (pycontrails.models.pcc.PCC method), 270
- smooth\_true\_airspeed (pycontrails.models.cocip.CocipParams attribute), 286
- smooth\_true\_airspeed\_polyorder (pycontrails.models.cocip.CocipParams attribute), 286
- smooth\_true\_airspeed\_window\_length (pycontrails.models.cocip.CocipParams attribute), 286
- solar\_constant (in module pycontrails.physics.constants), 393
- solar\_constant() (in module pycontrails.physics.geo), 414
- solar\_declination\_angle() (in module pycontrails.physics.geo), 415
- solar\_direct\_radiation() (in module pycon-

- `trails.physics.geo`), 415
  - `solar_hour_angle()` (in module `pycontrails.physics.geo`), 415
  - `sort()` (`pycontrails.core.fleet.Fleet` method), 456
  - `sort()` (`pycontrails.core.flight.Flight` method), 470
  - `sort()` (`pycontrails.core.vector.VectorDataset` method), 519
  - `sort()` (`pycontrails.Fleet` method), 209
  - `sort()` (`pycontrails.Flight` method), 200
  - `sort()` (`pycontrails.VectorDataset` method), 175
  - `source` (`pycontrails.core.aircraft_performance.AircraftPerformance` attribute), 388
  - `source` (`pycontrails.core.aircraft_performance.AircraftPerformance` attribute), 345
  - `source` (`pycontrails.core.aircraft_performance.AircraftPerformance` attribute), 346
  - `source` (`pycontrails.core.models.Model` attribute), 504
  - `source` (`pycontrails.ext.bada.BADAFlight` attribute), 531
  - `source` (`pycontrails.ext.bada.BADAGrid` attribute), 536
  - `source` (`pycontrails.Model` attribute), 257
  - `source` (`pycontrails.models.acf.ACCF` attribute), 338
  - `source` (`pycontrails.models.emissions.Emissions` attribute), 364
  - `source` (`pycontrails.models.humidity_scaling.ConstantHumidityScaling` attribute), 377
  - `source` (`pycontrails.models.humidity_scaling.ExponentialBoostHumidityScaling` attribute), 379
  - `source` (`pycontrails.models.humidity_scaling.ExponentialBoostLatitudeCoordinateHumidityScaling` attribute), 381
  - `source` (`pycontrails.models.humidity_scaling.HistogramMatching` attribute), 382
  - `source` (`pycontrails.models.humidity_scaling.HistogramMatchingWithFicks` attribute), 384
  - `source` (`pycontrails.models.humidity_scaling.HumidityScaling` attribute), 386
  - `source` (`pycontrails.models.humidity_scaling.HumidityScalingByLevel` attribute), 387
  - `source` (`pycontrails.models.issr.ISSR` attribute), 262
  - `source` (`pycontrails.models.pcr.PCR` attribute), 268
  - `source` (`pycontrails.models.ps_model.PSFlight` attribute), 353
  - `source` (`pycontrails.models.ps_model.PSGrid` attribute), 355
  - `source` (`pycontrails.models.sac.SAC` attribute), 264
  - `source_time` (`pycontrails.models.cocipgrid.CocipGrid` property), 328
  - `SourceType` (in module `pycontrails.core.models`), 505
  - `spatial_bounding_box()` (in module `pycontrails.physics.geo`), 416
  - `standard_name` (`pycontrails.core.met_var.MetVariable` attribute), 500
  - `standardize_variables()` (in module `pycontrails.core.met`), 498
  - `standardize_variables()` (`pycontrails.core.met.MetDataset` method), 496
  - `standardize_variables()` (`pycontrails.MetDataset` method), 159
  - `step_offset` (`pycontrails.datalib.ecmwf.HRES` property), 229
  - `step_offset` (`pycontrails.datalib.ecmwf.hres_model_level.HRESModelLevel` property), 233
  - `steps` (`pycontrails.datalib.ecmwf.HRES` property), 229
  - `steps` (`pycontrails.datalib.ecmwf.hres_model_level.HRESModelLevel` property), 233
  - `stratosphere_threshold` (`pycontrails.models.humidity_scaling.HumidityScalingByLevelParams` attribute), 388
  - `stream` (`pycontrails.datalib.ecmwf.HRES` attribute), 229
  - `sum()` (`pycontrails.core.vector.VectorDataset` class method), 519
  - `sum()` (`pycontrails.VectorDataset` class method), 175
  - `Sundqvist1989()` (`pycontrails.models.pcc.PCC` method), 270
  - `support_arraylike()` (in module `pycontrails.utils.types`), 524
  - `supported_pressure_levels` (`pycontrails.core.datalib.MetDataSource` property), 447
  - `supported_pressure_levels` (`pycontrails.datalib.ecmwf.ERA5` property), 220
  - `supported_pressure_levels` (`pycontrails.datalib.ecmwf.HRES` property), 230
  - `supported_pressure_levels` (`pycontrails.datalib.ecmwf.IFS` property), 237
  - `supported_pressure_levels` (`pycontrails.datalib.gfs.GFSForecast` property), 242
  - `supported_variables` (`pycontrails.core.datalib.MetDataSource` property), 448
  - `supported_variables` (`pycontrails.datalib.ecmwf.IFS` property), 237
  - `sur_variables` (`pycontrails.models.acf.ACCF` attribute), 338
  - `surface` (`pycontrails.models.pcc.PCC` attribute), 272
  - `surface_area_earth` (in module `pycontrails.physics.constants`), 393
  - `synonym_dict` (`pycontrails.ext.bada.BADA3` attribute), 542
  - `synonym_dict` (`pycontrails.ext.bada.BADA4` attribute), 546
- ## T
- `T_0` (`pycontrails.models.cocip.radiative_forcing.RFConstants` attribute), 306
  - `t_a` (`pycontrails.models.cocip.radiative_forcing.RFConstants` attribute), 307
  - `T_critical_sac()` (in module `pycontrails.models.sac`), 264

- `T_isa()` (*pycontrails.core.vector.GeoVectorDataset method*), 510
- `T_isa()` (*pycontrails.GeoVectorDataset method*), 180
- `T_lapse_rate` (in module *pycontrails.physics.constants*), 392
- `T_ms1` (in module *pycontrails.physics.constants*), 392
- `T_potential()` (in module *pycontrails.physics.thermo*), 393
- `T_potential_gradient()` (in module *pycontrails.physics.thermo*), 394
- `T_sat_liquid()` (in module *pycontrails.models.sac*), 265
- `T_sat_liquid_high_accuracy()` (in module *pycontrails.models.sac*), 265
- `target_split_size` (*pycontrails.models.cocipgrid.CocipGridParams attribute*), 334
- `target_split_size_pre_SAC_boost` (*pycontrails.models.cocipgrid.CocipGridParams attribute*), 334
- `tas_to_mach_number()` (in module *pycontrails.physics.units*), 421
- `tau_cirrus()` (in module *pycontrails.models.tau\_cirrus*), 375
- `temp_file()` (in module *pycontrails.utils.temp*), 525
- `temp_filename()` (in module *pycontrails.utils.temp*), 525
- `temperature_adiabatic_heating()` (in module *pycontrails.models.cocip.contrail\_properties*), 302
- `temperature_ratio()` (in module *pycontrails.physics.jet*), 404
- `tet_mcc` (*pycontrails.models.ps\_model.PSAircraftEngineParams attribute*), 360
- `tet_mto` (*pycontrails.models.ps\_model.PSAircraftEngineParams attribute*), 360
- `thrust` (*pycontrails.core.aircraft\_performance.AircraftPerformance attribute*), 345
- `thrust_force()` (in module *pycontrails.physics.jet*), 404
- `thrust_setting_nd()` (in module *pycontrails.physics.jet*), 405
- `time_end` (*pycontrails.core.flight.Flight property*), 470
- `time_end` (*pycontrails.Flight property*), 200
- `time_horizon` (*pycontrails.models.accf.ACcfParams attribute*), 341
- `time_start` (*pycontrails.core.flight.Flight property*), 470
- `time_start` (*pycontrails.Flight property*), 200
- `timeout` (*pycontrails.core.cache.GCPCacheStore attribute*), 442
- `timeout` (*pycontrails.GCPCacheStore attribute*), 431
- `timesteps` (*pycontrails.core.datalib.MetDataSource attribute*), 448
- `timesteps` (*pycontrails.datalib.ecmwf.arco\_era5.ARCOERA5 attribute*), 246
- `timesteps` (*pycontrails.datalib.ecmwf.era5\_model\_level.ERA5ModelLevel attribute*), 224
- `timesteps` (*pycontrails.datalib.ecmwf.hres\_model\_level.HRESModelLevel attribute*), 233
- `timesteps` (*pycontrails.models.cocip.Cocip attribute*), 280
- `timesteps` (*pycontrails.models.cocipgrid.CocipGrid attribute*), 328
- `to_ash()` (in module *pycontrails.datalib.goes*), 252
- `to_dataframe()` (*pycontrails.core.vector.VectorDataset method*), 520
- `to_dataframe()` (*pycontrails.VectorDataset method*), 176
- `to_dict()` (*pycontrails.core.vector.VectorDataset method*), 520
- `to_dict()` (*pycontrails.VectorDataset method*), 176
- `to_flight_list()` (*pycontrails.core.fleet.Fleet method*), 456
- `to_flight_list()` (*pycontrails.Fleet method*), 209
- `to_geojson_linestring()` (*pycontrails.core.flight.Flight method*), 470
- `to_geojson_linestring()` (*pycontrails.Flight method*), 200
- `to_geojson_multilinestring()` (*pycontrails.core.flight.Flight method*), 471
- `to_geojson_multilinestring()` (*pycontrails.Flight method*), 200
- `to_geojson_points()` (*pycontrails.core.vector.GeoVectorDataset method*), 513
- `to_geojson_points()` (*pycontrails.GeoVectorDataset method*), 183
- `to_geojson` (*pycontrails.models.humidity\_scaling.HumidityScaling property*), 386
- `to_line_data_grid()` (*pycontrails.core.vector.GeoVectorDataset method*), 514
- `to_lon_lat_grid()` (*pycontrails.GeoVectorDataset method*), 183
- `to_polygon_feature()` (*pycontrails.core.met.MetdataArray method*), 488
- `to_polygon_feature()` (*pycontrails.MetdataArray method*), 166
- `to_polygon_feature_collection()` (*pycontrails.core.met.MetdataArray method*), 490
- `to_polygon_feature_collection()` (*pycontrails.MetdataArray method*), 168
- `to_polyhedra()` (*pycontrails.core.met.MetdataArray method*), 490
- `to_polyhedra()` (*pycontrails.MetdataArray method*), 168
- `to_pseudo_mercator()` (*pycon-*

- `trails.core.vector.GeoVectorDataset` (method), 514
  - `to_pseudo_mercator()` (`pycontrails.GeoVectorDataset` method), 184
  - `to_traffic()` (`pycontrails.core.flight.Flight` method), 471
  - `to_traffic()` (`pycontrails.Flight` method), 200
  - `to_true_color()` (in module `pycontrails.datalib.goes`), 253
  - `to_vector()` (`pycontrails.core.met.MetDataset` method), 497
  - `to_vector()` (`pycontrails.MetDataset` method), 159
  - `tr_ec` (`pycontrails.models.ps_model.PSAircraftEngineParams` attribute), 360
  - `transfer_met_source_attrs()` (`pycontrails.core.models.Model` method), 504
  - `transfer_met_source_attrs()` (`pycontrails.Model` method), 257
  - `transform_crs()` (`pycontrails.core.vector.GeoVectorDataset` method), 514
  - `transform_crs()` (`pycontrails.GeoVectorDataset` method), 184
  - `true_airspeed` (`pycontrails.core.aircraft_performance.AircraftPerformanceData` attribute), 346
  - `true_airspeed` (`pycontrails.models.cocipgrid.CocipGridParams` attribute), 334
  - `turbine_inlet_temperature()` (in module `pycontrails.physics.jet`), 406
  - `turbine_inlet_temperature_imfox()` (in module `pycontrails.models.emissions.black_carbon`), 371
  - `turbulent_kinetic_energy_dissipation_rate()` (in module `pycontrails.models.cocip.wake_vortex`), 319
  - `type_guard()` (in module `pycontrails.utils.types`), 524
- ## U
- `units` (`pycontrails.core.met_var.MetVariable` attribute), 500
  - `unterstrasser_ice_survival_fraction` (`pycontrails.models.cocip.CocipParams` attribute), 286
  - `update()` (`pycontrails.core.met.MetDataset` method), 497
  - `update()` (`pycontrails.core.vector.VectorDataDict` method), 514
  - `update()` (`pycontrails.core.vector.VectorDataset` method), 521
  - `update()` (`pycontrails.MetDataset` method), 160
  - `update()` (`pycontrails.VectorDataset` method), 177
  - `update_aircraft_mass()` (in module `pycontrails.physics.jet`), 406
  - `update_param_dict()` (in module `pycontrails.core.models`), 506
  - `update_params()` (`pycontrails.core.models.Model` method), 504
  - `update_params()` (`pycontrails.Model` method), 257
  - `url` (`pycontrails.datalib.ecmwf.ERA5` attribute), 221
  - `url` (`pycontrails.datalib.ecmwf.HRES` attribute), 230
- ## V
- `validate_timestep_freq()` (in module `pycontrails.core.datalib`), 450
  - `values` (`pycontrails.core.met.MetdataArray` property), 491
  - `values` (`pycontrails.MetdataArray` property), 169
  - `variable_shortnames` (`pycontrails.core.datalib.MetDataSource` property), 448
  - `variable_standardnames` (`pycontrails.core.datalib.MetDataSource` property), 448
  - `variables` (`pycontrails.core.datalib.MetDataSource` attribute), 448
  - `variables` (`pycontrails.core.met.MetBase` property), 483
  - `variables` (`pycontrails.datalib.ecmwf.arco_era5.ARCOERA5` attribute), 246
  - `variables` (`pycontrails.datalib.ecmwf.era5_model_level.ERA5ModelLevel` attribute), 224
  - `variables` (`pycontrails.datalib.ecmwf.hres_model_level.HRESModelLevel` attribute), 233
  - `vector_to_lon_lat_grid()` (in module `pycontrails.core.vector`), 521
  - `VectorDataDict` (class in `pycontrails.core.vector`), 514
  - `VectorDataset` (class in `pycontrails`), 170
  - `VectorDataset` (class in `pycontrails.core.vector`), 515
  - `VectorDatasetType` (class in `pycontrails.core.vector`), 521
  - `verbose_outputs` (`pycontrails.models.cocip.CocipParams` attribute), 287
  - `verbose_outputs_evolution` (`pycontrails.models.cocipgrid.CocipGridParams` attribute), 334
  - `verbose_outputs_formation` (`pycontrails.models.cocipgrid.CocipGridParams` attribute), 334
  - `verify_met` (`pycontrails.core.models.ModelParams` attribute), 505
  - `verify_met` (`pycontrails.ModelParams` attribute), 259
  - `version` (`pycontrails.ext.bada.BADA3` attribute), 542
  - `version` (`pycontrails.ext.bada.BADA4` attribute), 546
  - `vertical_diffusivity()` (in module `pycontrails.models.cocip.contrail_properties`),



303  
 vertical\_keys (pycontrails.core.vector.GeoVectorDataset attribute), 514  
 vertical\_keys (pycontrails.GeoVectorDataset attribute), 184

## W

wake\_vortex\_separation() (in module pycontrails.models.cocip.wake\_vortex), 319  
 wind\_shear() (in module pycontrails.models.cocip.wind\_shear), 320  
 wind\_shear\_enhancement\_exponent (pycontrails.models.cocip.CocipParams attribute), 287  
 wind\_shear\_enhancement\_factor() (in module pycontrails.models.cocip.wind\_shear), 320  
 wind\_shear\_normal() (in module pycontrails.models.cocip.wind\_shear), 321  
 wing\_aspect\_ratio (pycontrails.models.ps\_model.PSAircraftEngineParams attribute), 360  
 wing\_constant (pycontrails.models.ps\_model.PSAircraftEngineParams attribute), 360  
 wing\_span (pycontrails.models.ps\_model.PSAircraftEngineParams attribute), 360  
 wing\_surface\_area (pycontrails.models.ps\_model.PSAircraftEngineParams attribute), 360  
 winglets (pycontrails.models.ps\_model.PSAircraftEngineParams attribute), 360  
 wingspan (pycontrails.models.cocipgrid.CocipGridParams attribute), 334  
 wrap\_longitude() (pycontrails.core.met.MetadataArray method), 491  
 wrap\_longitude() (pycontrails.core.met.MetadataSet method), 497  
 wrap\_longitude() (pycontrails.MetadataArray method), 169  
 wrap\_longitude() (pycontrails.MetadataSet method), 160

## X

x\_ref (pycontrails.models.ps\_model.PSAircraftEngineParams attribute), 361  
 xi\_indices (pycontrails.core.interpolation.RGIArtifacts attribute), 479
